# Supplementary material
Source: MDPI journal article supplement (https://www.mdpi.com/2304-6740/5/3/53)
Supplement: s1 [file s1]

Archive with 11 entries (10 files):
- New folder/
- New folder/1-Br123K.cif
- New folder/1-Br_123K_checkcif.pdf
- New folder/1-Cl123K.cif
- New folder/1-Cl300K.cif
- New folder/1-Cl_123K_checkcif.pdf
- New folder/1-Cl_300K_checkcif.pdf
- New folder/2-Br123K.cif
- New folder/2-Br_123K_checkcif.pdf
- New folder/2-Cl123K.cif
- New folder/2-Cl_123K_checkcif.pdf
