# Supplementary material
Source: MDPI journal article supplement (https://www.mdpi.com/2304-6740/5/3/53)
Supplement: s1 [file s1 › New folder/1-Br123K.cif]

data_global
_audit_creation_date                               2017-03-26
_audit_creation_method                            'by CrystalStructure 4.2.2'
_audit_update_record                               ?

#==============================================================================
# PROCESSING SUMMARY (IUCr Office Use Only)

_journal_date_recd_electronic                      ?
_journal_date_from_coeditor                        ?
_journal_date_accepted                             ?
_journal_coeditor_code                             ?

#==============================================================================
# SUBMISSION DETAILS

_publ_contact_author_name                         'ENTER NAME'
_publ_contact_author_email                        'ENTER EMAIL ADDRESS'
_publ_contact_author_fax                          'ENTER FAX NUMBER'
_publ_contact_author_phone                        'ENTER PHONE NUMBER'
_publ_contact_letter
;
    ENTER TEXT OF LETTER
;
_publ_requested_journal                           'ENTER JOURNAL NAME HERE'
_publ_requested_category
                                               'CHOOSE FI FM FO CI CM CO or AD'
_publ_requested_coeditor_name                      ?

#==============================================================================
# TITLE AND AUTHOR LIST

_publ_section_title
;
    ENTER SECTION TITLE
;
_publ_section_title_footnote
;
    ENTER FOOTNOTE TO TITLE OF PAPER
;
loop_
_publ_author_name
_publ_author_footnote
_publ_author_address
' FIRST AUTHORS NAME '
;
  FIRST AUTHORS FOOTNOTES
;
;
  FIRST AUTHORS ADDRESS
;
_publ_section_synopsis
;
    ENTER SYNOPSIS
;

#==============================================================================
# TEXT

_publ_section_abstract
;
    ENTER ABSTRACT
;
_publ_section_comment
;
    ENTER TEXT
;
_publ_section_references
;
    ENTER OTHER REFERENCES

    Rigaku (2016). CrystalStructure. Version 4.2.2. 
    Rigaku Corporation, Tokyo, Japan.

    Altomare, A., Burla, M. C., Camalli, M., Cascarano, G. L., 
    Giacovazzo, C., Guagliardi, A., Moliterni, A. G. G., 
    Polidori, G. and Spagna, R. 
    (1999). J. Appl. Cryst. 32, 115-119.
    SIR97

    Sheldrick, G.M. (2008) SHELXL Version 2014/7, Acta Cryst. A64, 112-122.

    Rigaku (1998). REQAB. 
    Rigaku Corporation, Tokyo, Japan.

;
_publ_section_figure_captions
;
    ENTER FIGURE CAPTIONS
;
_publ_section_exptl_prep
;
    ENTER COMPOUND PREPARATION DETAILS
;
_publ_section_exptl_refinement
;
    ENTER SPECIAL DETAILS OF THE REFINEMENT
;

#==============================================================================
data_1-Br123K

#==============================================================================
# CHEMICAL DATA

_chemical_formula_sum                             'C34 H21 Br4 Cl2 Fe N8 O10'
_chemical_formula_moiety                          'C34 H21 Br4 Cl2 Fe N8 O10'
_chemical_formula_weight                           1147.96
_chemical_melting_point                            ?

#==============================================================================
# CRYSTAL DATA
_space_group_crystal_system                        monoclinic
_space_group_name_H-M_alt                         'C 1 2/c 1'
_space_group_name_Hall                            '-C 2yc'
_space_group_IT_number                             15
loop_
 _space_group_symop_operation_xyz
 'x, y, z'
 '-x, y, -z+1/2'
 'x+1/2, y+1/2, z'
 '-x+1/2, y+1/2, -z+1/2'
 '-x, -y, -z'
 'x, -y, z-1/2'
 '-x+1/2, -y+1/2, -z'
 'x+1/2, -y+1/2, z-1/2'
#------------------------------------------------------------------------------
_cell_length_a                                     12.595(3)
_cell_length_b                                     30.851(7)
_cell_length_c                                     9.607(2)
_cell_angle_alpha                                  90.0000
_cell_angle_beta                                   95.945(5)
_cell_angle_gamma                                  90.0000
_cell_volume                                       3713.2(16)
_cell_formula_units_Z                              4
_cell_measurement_reflns_used                      7238
_cell_measurement_theta_min                        1.75
_cell_measurement_theta_max                        30.62
_cell_measurement_temperature                      123
#------------------------------------------------------------------------------
_exptl_crystal_description                         prism
_exptl_crystal_colour                              colorless
_exptl_crystal_size_max                            0.200
_exptl_crystal_size_mid                            0.200
_exptl_crystal_size_min                            0.200
_exptl_crystal_density_diffrn                      2.053
_exptl_crystal_density_meas                        ?
_exptl_crystal_density_method                     'not measured'
_exptl_crystal_F_000                               2244.00
_exptl_absorpt_coefficient_mu                      4.939
_exptl_absorpt_correction_type                     multi-scan
_exptl_absorpt_process_details                    'REQAB (Rigaku, 1998)'
_exptl_absorpt_correction_T_min                    0.282
_exptl_absorpt_correction_T_max                    0.372

#==============================================================================
# EXPERIMENTAL DATA

_diffrn_ambient_temperature                        123
_diffrn_radiation_type                            'Mo K\a'
_diffrn_radiation_wavelength                       0.71075
_diffrn_measurement_device_type                   'Rigaku Saturn724'
_diffrn_measurement_method                         \w
_diffrn_detector_area_resol_mean                   14.222
_diffrn_reflns_number                              16626
_diffrn_reflns_av_R_equivalents                    0.0699
_diffrn_reflns_theta_max                           27.485
_diffrn_reflns_theta_min                           3.224
_diffrn_reflns_theta_full                          25.242
_diffrn_measured_fraction_theta_max                0.991
_diffrn_measured_fraction_theta_full               0.996
_diffrn_reflns_Laue_measured_fraction_max          0.991
_diffrn_reflns_Laue_measured_fraction_full         0.996
_diffrn_reflns_point_group_measured_fraction_max   0.991
_diffrn_reflns_point_group_measured_fraction_full  0.996
_diffrn_reflns_limit_h_min                        -16
_diffrn_reflns_limit_h_max                         16
_diffrn_reflns_limit_k_min                        -40
_diffrn_reflns_limit_k_max                         40
_diffrn_reflns_limit_l_min                        -12
_diffrn_reflns_limit_l_max                         12
_diffrn_standards_number                           0
_diffrn_standards_interval_count                   .
_diffrn_standards_decay_%                          ?
_reflns_number_total                               4242
_reflns_number_gt                                  3785
_reflns_threshold_expression                       F^2^>2.0\s(F^2^)
_reflns_Friedel_coverage          0.000
_reflns_Friedel_fraction_max      .
_reflns_Friedel_fraction_full     .

#==============================================================================
# REFINEMENT DATA

_refine_special_details
;
    Refinement was performed using all reflections. The weighted 
    R-factor (wR) and goodness of fit (S) are based on F^2^.
    R-factor (gt) are based on F. The threshold expression of
    F^2^ > 2.0 sigma(F^2^) is used only for calculating R-factor (gt).
;
_refine_ls_structure_factor_coef                   Fsqd
_refine_ls_R_factor_all                            0.0598
_refine_ls_R_factor_gt                             0.0513
_refine_ls_wR_factor_ref                           0.0932
_refine_ls_wR_factor_gt                            0.0887
_refine_ls_number_restraints                       0
_refine_ls_hydrogen_treatment                      mixed
_refine_ls_number_reflns                           4242
_refine_ls_number_parameters                       274
_refine_ls_goodness_of_fit_ref                     1.128
_refine_ls_weighting_scheme                        calc
_refine_ls_weighting_details
          'w = 1/[\s^2^(Fo^2^)+(0.0096P)^2^+30.9250P] where P=(Fo^2^+2Fc^2^)/3'
_atom_sites_solution_hydrogens                     geom
_atom_sites_solution_primary                       direct
_atom_sites_solution_secondary                     difmap
_refine_ls_shift/su_max                            0.000
_refine_diff_density_max                           0.68
_refine_diff_density_min                          -0.66
_refine_ls_extinction_method                       none
_refine_ls_extinction_coef                         ?

loop_
_atom_type_symbol
_atom_type_description
_atom_type_scat_dispersion_real
_atom_type_scat_dispersion_imag
_atom_type_scat_source
  'C' 'C'  0.0033 0.0016 
;
International Tables for Crystallography
(Vol. C, Tables 4.2.6.8 and 6.1.1.4)
;
  'H' 'H'  0.0000 0.0000 
;
International Tables for Crystallography
(Vol. C, Table 6.1.1.4)
;
  'N' 'N'  0.0061 0.0033 
;
International Tables for Crystallography
(Vol. C, Tables 4.2.6.8 and 6.1.1.4)
;
  'O' 'O'  0.0106 0.0060 
;
International Tables for Crystallography
(Vol. C, Tables 4.2.6.8 and 6.1.1.4)
;
  'Fe' 'Fe'  0.3463 0.8444 
;
International Tables for Crystallography
(Vol. C, Tables 4.2.6.8 and 6.1.1.4)
;
  'Cl' 'Cl'  0.1484 0.1585 
;
International Tables for Crystallography
(Vol. C, Tables 4.2.6.8 and 6.1.1.4)
;
  'Br' 'Br'  -0.2901 2.4595 
;
International Tables for Crystallography
(Vol. C, Tables 4.2.6.8 and 6.1.1.4)
;

#==============================================================================
# ATOMIC COORDINATES AND THERMAL PARAMETERS

loop_
 _atom_site_label
 _atom_site_type_symbol
 _atom_site_fract_x
 _atom_site_fract_y
 _atom_site_fract_z
 _atom_site_U_iso_or_equiv
 _atom_site_adp_type
 _atom_site_occupancy
 _atom_site_site_symmetry_order  
 _atom_site_calc_flag
 _atom_site_refinement_flags_posn
 _atom_site_refinement_flags_adp
 _atom_site_refinement_flags_occupancy
 _atom_site_disorder_assembly
 _atom_site_disorder_group
Br1 Br 0.81283(4) 0.02243(2) -0.25323(5) 0.01866(12) Uani 1 1 d . . . . .
Br2 Br 0.94708(4) 0.10172(2) -0.07579(5) 0.01754(12) Uani 1 1 d . . . . .
Fe1 Fe 0.5000 0.15565(3) -0.2500 0.01358(19) Uani 1 2 d S T P . .
Cl1 Cl 0.85958(10) 0.33346(4) -0.25463(13) 0.0252(3) Uani 1 1 d . . . . .
O1 O 0.5599(2) 0.19695(10) -0.1249(3) 0.0180(7) Uani 1 1 d . . . . .
O2 O 0.4583(3) 0.26139(12) -0.0200(4) 0.0370(10) Uani 1 1 d . . . . .
O3 O 0.5729(3) 0.30438(10) 0.0921(3) 0.0223(7) Uani 1 1 d . . . . .
O4 O 0.7818(2) -0.07453(10) -0.0899(3) 0.0205(7) Uani 1 1 d . . . . .
O5 O 0.9046(2) -0.09227(10) -0.2320(3) 0.0210(7) Uani 1 1 d . . . . .
N1 N 0.4563(3) 0.10967(12) -0.3873(4) 0.0162(8) Uani 1 1 d . . . . .
N2 N 0.6358(3) 0.11383(12) -0.4136(4) 0.0169(8) Uani 1 1 d . . . . .
N3 N 0.6289(3) 0.15294(11) -0.3415(4) 0.0135(7) Uani 1 1 d . . . . .
N4 N 0.5462(3) 0.27834(12) -0.0032(4) 0.0201(8) Uani 1 1 d . . . . .
C1 C 0.5389(3) 0.09493(14) -0.4529(5) 0.0159(9) Uani 1 1 d . . . . .
C2 C 0.5268(4) 0.06207(15) -0.5528(5) 0.0226(10) Uani 1 1 d . . . . .
H1 H 0.5864 0.0508 -0.5939 0.027 Uiso 1 1 calc R U . . .
C3 C 0.4251(4) 0.04653(16) -0.5900(5) 0.0266(11) Uani 1 1 d . . . . .
H2 H 0.4141 0.0243 -0.6585 0.032 Uiso 1 1 calc R U . . .
C4 C 0.3381(4) 0.06309(16) -0.5279(5) 0.0237(11) Uani 1 1 d . . . . .
H3 H 0.2678 0.0531 -0.5554 0.028 Uiso 1 1 calc R U . . .
C5 C 0.3568(3) 0.09411(15) -0.4266(5) 0.0194(10) Uani 1 1 d . . . . .
H4 H 0.2984 0.1051 -0.3824 0.023 Uiso 1 1 calc R U . . .
C6 C 0.7115(3) 0.17841(14) -0.3306(4) 0.0146(9) Uani 1 1 d . . . . .
C7 C 0.8115(3) 0.16547(15) -0.3905(5) 0.0187(10) Uani 1 1 d . . . . .
H7B H 0.8022 0.1694 -0.4923 0.022 Uiso 1 1 calc R U . . .
H8C H 0.8272 0.1350 -0.3687 0.022 Uiso 1 1 calc R U . . .
H9A H 0.8708 0.1835 -0.3500 0.022 Uiso 1 1 calc R U . . .
C8 C 0.7035(3) 0.21990(14) -0.2584(4) 0.0151(9) Uani 1 1 d . . . . .
C9 C 0.7743(3) 0.25313(14) -0.2844(5) 0.0168(9) Uani 1 1 d . . . . .
H10 H 0.8263 0.2483 -0.3476 0.020 Uiso 1 1 calc R U . . .
C10 C 0.7697(4) 0.29296(15) -0.2196(5) 0.0189(10) Uani 1 1 d . . . . .
C11 C 0.6950(4) 0.30110(14) -0.1272(5) 0.0190(10) Uani 1 1 d . . . . .
H11 H 0.6919 0.3285 -0.0826 0.023 Uiso 1 1 calc R U . . .
C12 C 0.6247(3) 0.26833(14) -0.1015(5) 0.0149(9) Uani 1 1 d . . . . .
C13 C 0.6248(3) 0.22694(14) -0.1634(5) 0.0156(9) Uani 1 1 d . . . . .
C14 C 0.8695(3) -0.06968(14) -0.1346(5) 0.0155(9) Uani 1 1 d . . . . .
C15 C 0.9404(3) -0.03336(14) -0.0703(4) 0.0139(9) Uani 1 1 d . . . . .
C16 C 0.9184(3) 0.00964(14) -0.1038(4) 0.0145(9) Uani 1 1 d . . . . .
C17 C 0.9767(4) 0.04272(14) -0.0336(4) 0.0160(9) Uani 1 1 d . . . . .
H6 H 0.682(4) 0.1097(16) -0.460(5) 0.018(14) Uiso 1 1 d . . . . .
H12 H 1.0000 -0.089(5) -0.2500 0.15(6) Uiso 1 2 d S . P . .

loop_
 _atom_site_aniso_label
 _atom_site_aniso_U_11
 _atom_site_aniso_U_22
 _atom_site_aniso_U_33
 _atom_site_aniso_U_23
 _atom_site_aniso_U_13
 _atom_site_aniso_U_12
Br1 0.0174(2) 0.0205(2) 0.0172(2) -0.00040(18) -0.00271(18) 0.00084(17)
Br2 0.0183(2) 0.0148(2) 0.0192(2) 0.00137(18) 0.00059(18) -0.00032(17)
Fe1 0.0118(4) 0.0140(4) 0.0152(4) 0.000 0.0024(4) 0.000
Cl1 0.0225(6) 0.0215(5) 0.0321(7) 0.0008(5) 0.0047(5) -0.0075(5)
O1 0.0159(16) 0.0206(16) 0.0180(16) -0.0034(13) 0.0043(13) -0.0044(13)
O2 0.0194(18) 0.040(2) 0.054(3) -0.024(2) 0.0147(18) -0.0093(16)
O3 0.0272(18) 0.0196(16) 0.0198(17) -0.0055(14) 0.0009(14) 0.0024(14)
O4 0.0132(15) 0.0253(17) 0.0239(17) -0.0020(14) 0.0056(13) -0.0053(13)
O5 0.0184(17) 0.0236(17) 0.0213(17) -0.0072(14) 0.0038(14) -0.0031(14)
N1 0.0176(19) 0.0189(18) 0.0123(18) 0.0022(15) 0.0027(15) -0.0005(15)
N2 0.0140(19) 0.0164(19) 0.021(2) -0.0048(16) 0.0047(17) -0.0025(15)
N3 0.0148(18) 0.0123(17) 0.0134(18) 0.0020(14) 0.0014(15) 0.0022(14)
N4 0.021(2) 0.0178(19) 0.021(2) -0.0038(16) 0.0017(17) 0.0021(16)
C1 0.014(2) 0.017(2) 0.017(2) 0.0015(18) 0.0038(18) -0.0003(17)
C2 0.021(2) 0.023(2) 0.025(3) -0.005(2) 0.006(2) -0.0037(19)
C3 0.031(3) 0.030(3) 0.019(2) -0.012(2) 0.005(2) -0.009(2)
C4 0.015(2) 0.032(3) 0.024(3) -0.004(2) 0.001(2) -0.008(2)
C5 0.009(2) 0.029(2) 0.020(2) 0.001(2) 0.0009(18) -0.0065(18)
C6 0.014(2) 0.018(2) 0.012(2) 0.0015(17) 0.0015(17) 0.0002(17)
C7 0.015(2) 0.021(2) 0.019(2) -0.0019(19) 0.0005(19) 0.0010(18)
C8 0.014(2) 0.016(2) 0.014(2) 0.0008(17) -0.0005(18) 0.0013(17)
C9 0.015(2) 0.018(2) 0.017(2) 0.0018(18) 0.0002(18) -0.0017(17)
C10 0.016(2) 0.021(2) 0.020(2) 0.0004(19) -0.0007(19) -0.0003(18)
C11 0.018(2) 0.016(2) 0.023(2) -0.0010(19) -0.0002(19) 0.0007(18)
C12 0.010(2) 0.020(2) 0.015(2) -0.0022(18) 0.0032(17) 0.0021(17)
C13 0.015(2) 0.019(2) 0.014(2) 0.0002(18) 0.0008(18) -0.0008(17)
C14 0.016(2) 0.014(2) 0.015(2) 0.0012(18) -0.0018(18) -0.0005(17)
C15 0.0118(19) 0.019(2) 0.012(2) -0.0018(17) 0.0041(17) -0.0039(17)
C16 0.010(2) 0.018(2) 0.015(2) 0.0030(18) -0.0021(17) -0.0016(16)
C17 0.022(2) 0.016(2) 0.011(2) 0.0018(17) 0.0051(18) 0.0006(18)

#==============================================================================
_computing_data_collection
                                             'CrystalClear (Rigaku Inc., 2008)'
_computing_cell_refinement                         CrystalClear
_computing_data_reduction                          CrystalClear
_computing_structure_solution                      SIR97
_computing_structure_refinement
                                      'SHELXL Version 2014/7 (Sheldrick, 2008)'
_computing_publication_material
                                        'CrystalStructure 4.2.2 (Rigaku, 2016)'
_computing_molecular_graphics                     'CrystalStructure 4.2.2'

#==============================================================================
# MOLECULAR GEOMETRY

_geom_special_details
;
 All esds (except the esd in the dihedral angle between two l.s. planes)
 are estimated using the full covariance matrix.  The cell esds are taken
 into account individually in the estimation of esds in distances, angles
 and torsion angles; correlations between esds in cell parameters are only
 used when they are defined by crystal symmetry.  An approximate (isotropic)
 treatment of cell esds is used for estimating esds involving l.s. planes.
;

loop_
 _geom_bond_atom_site_label_1
 _geom_bond_atom_site_label_2
 _geom_bond_distance
 _geom_bond_site_symmetry_2
 _geom_bond_publ_flag
Br1 C16 1.894(4) . ?
Br2 C17 1.894(4) . ?
Fe1 O1 1.857(3) . ?
Fe1 O1 1.857(3) 2_654 ?
Fe1 N3 1.926(3) 2_654 ?
Fe1 N3 1.926(3) . ?
Fe1 N1 1.976(4) 2_654 ?
Fe1 N1 1.976(4) . ?
Cl1 C10 1.742(5) . ?
O1 C13 1.313(5) . ?
O2 N4 1.220(5) . ?
O3 N4 1.238(5) . ?
O4 C14 1.235(5) . ?
O5 C14 1.282(5) . ?
O5 H12 1.236(13) . ?
N1 C1 1.351(5) . ?
N1 C5 1.358(5) . ?
N2 C1 1.370(6) . ?
N2 N3 1.398(5) . ?
N2 H6 0.77(5) . ?
N3 C6 1.300(5) . ?
N4 C12 1.470(5) . ?
C1 C2 1.394(6) . ?
C2 C3 1.379(6) . ?
C2 H1 0.9500 . ?
C3 C4 1.397(7) . ?
C3 H2 0.9500 . ?
C4 C5 1.368(6) . ?
C4 H3 0.9500 . ?
C5 H4 0.9500 . ?
C6 C8 1.465(6) . ?
C6 C7 1.493(6) . ?
C7 H7B 0.9800 . ?
C7 H8C 0.9800 . ?
C7 H9A 0.9800 . ?
C8 C9 1.398(6) . ?
C8 C13 1.432(6) . ?
C9 C10 1.382(6) . ?
C9 H10 0.9500 . ?
C10 C11 1.381(6) . ?
C11 C12 1.382(6) . ?
C11 H11 0.9500 . ?
C12 C13 1.408(6) . ?
C14 C15 1.524(6) . ?
C15 C16 1.386(6) . ?
C15 C17 1.398(6) 5_755 ?
C16 C17 1.391(6) . ?
C17 C15 1.398(6) 5_755 ?

loop_
 _geom_angle_atom_site_label_1
 _geom_angle_atom_site_label_2
 _geom_angle_atom_site_label_3
 _geom_angle
 _geom_angle_site_symmetry_1
 _geom_angle_site_symmetry_3
 _geom_angle_publ_flag
O1 Fe1 O1 93.4(2) . 2_654 ?
O1 Fe1 N3 92.27(14) . 2_654 ?
O1 Fe1 N3 91.15(14) 2_654 2_654 ?
O1 Fe1 N3 91.15(14) . . ?
O1 Fe1 N3 92.27(14) 2_654 . ?
N3 Fe1 N3 175.0(2) 2_654 . ?
O1 Fe1 N1 89.65(14) . 2_654 ?
O1 Fe1 N1 172.27(14) 2_654 2_654 ?
N3 Fe1 N1 81.61(15) 2_654 2_654 ?
N3 Fe1 N1 94.78(15) . 2_654 ?
O1 Fe1 N1 172.27(14) . . ?
O1 Fe1 N1 89.66(14) 2_654 . ?
N3 Fe1 N1 94.78(15) 2_654 . ?
N3 Fe1 N1 81.61(15) . . ?
N1 Fe1 N1 88.2(2) 2_654 . ?
C13 O1 Fe1 121.6(3) . . ?
C14 O5 H12 118(4) . . ?
C1 N1 C5 119.0(4) . . ?
C1 N1 Fe1 112.2(3) . . ?
C5 N1 Fe1 128.7(3) . . ?
C1 N2 N3 113.8(4) . . ?
C1 N2 H6 118(4) . . ?
N3 N2 H6 121(4) . . ?
C6 N3 N2 118.1(4) . . ?
C6 N3 Fe1 130.0(3) . . ?
N2 N3 Fe1 111.2(3) . . ?
O2 N4 O3 123.4(4) . . ?
O2 N4 C12 119.1(4) . . ?
O3 N4 C12 117.5(4) . . ?
N1 C1 N2 115.9(4) . . ?
N1 C1 C2 122.1(4) . . ?
N2 C1 C2 122.0(4) . . ?
C3 C2 C1 117.6(4) . . ?
C3 C2 H1 121.2 . . ?
C1 C2 H1 121.2 . . ?
C2 C3 C4 120.7(4) . . ?
C2 C3 H2 119.7 . . ?
C4 C3 H2 119.7 . . ?
C5 C4 C3 118.3(4) . . ?
C5 C4 H3 120.8 . . ?
C3 C4 H3 120.8 . . ?
N1 C5 C4 122.1(4) . . ?
N1 C5 H4 118.9 . . ?
C4 C5 H4 118.9 . . ?
N3 C6 C8 118.2(4) . . ?
N3 C6 C7 120.5(4) . . ?
C8 C6 C7 121.3(4) . . ?
C6 C7 H7B 109.5 . . ?
C6 C7 H8C 109.5 . . ?
H7B C7 H8C 109.5 . . ?
C6 C7 H9A 109.5 . . ?
H7B C7 H9A 109.5 . . ?
H8C C7 H9A 109.5 . . ?
C9 C8 C13 120.0(4) . . ?
C9 C8 C6 118.6(4) . . ?
C13 C8 C6 121.4(4) . . ?
C10 C9 C8 120.9(4) . . ?
C10 C9 H10 119.5 . . ?
C8 C9 H10 119.5 . . ?
C11 C10 C9 121.0(4) . . ?
C11 C10 Cl1 119.6(4) . . ?
C9 C10 Cl1 119.5(3) . . ?
C10 C11 C12 118.2(4) . . ?
C10 C11 H11 120.9 . . ?
C12 C11 H11 120.9 . . ?
C11 C12 C13 124.0(4) . . ?
C11 C12 N4 116.5(4) . . ?
C13 C12 N4 119.4(4) . . ?
O1 C13 C12 119.5(4) . . ?
O1 C13 C8 124.4(4) . . ?
C12 C13 C8 115.9(4) . . ?
O4 C14 O5 125.2(4) . . ?
O4 C14 C15 117.2(4) . . ?
O5 C14 C15 117.6(4) . . ?
C16 C15 C17 118.7(4) . 5_755 ?
C16 C15 C14 120.9(4) . . ?
C17 C15 C14 120.1(4) 5_755 . ?
C15 C16 C17 120.4(4) . . ?
C15 C16 Br1 118.9(3) . . ?
C17 C16 Br1 120.6(3) . . ?
C16 C17 C15 120.9(4) . 5_755 ?
C16 C17 Br2 121.3(3) . . ?
C15 C17 Br2 117.9(3) 5_755 . ?

loop_
 _geom_torsion_atom_site_label_1
 _geom_torsion_atom_site_label_2
 _geom_torsion_atom_site_label_3
 _geom_torsion_atom_site_label_4
 _geom_torsion
 _geom_torsion_site_symmetry_1
 _geom_torsion_site_symmetry_2
 _geom_torsion_site_symmetry_3
 _geom_torsion_site_symmetry_4
 _geom_torsion_publ_flag
O1 Fe1 O1 C13 -56.1(3) 2_654 . . . ?
N3 Fe1 O1 C13 -147.4(3) 2_654 . . . ?
N3 Fe1 O1 C13 36.2(3) . . . . ?
N1 Fe1 O1 C13 131.0(3) 2_654 . . . ?
C1 N2 N3 C6 -163.2(4) . . . . ?
C1 N2 N3 Fe1 25.2(4) . . . . ?
C5 N1 C1 N2 176.3(4) . . . . ?
Fe1 N1 C1 N2 0.2(5) . . . . ?
C5 N1 C1 C2 -4.6(6) . . . . ?
Fe1 N1 C1 C2 179.2(4) . . . . ?
N3 N2 C1 N1 -16.7(5) . . . . ?
N3 N2 C1 C2 164.3(4) . . . . ?
N1 C1 C2 C3 4.0(7) . . . . ?
N2 C1 C2 C3 -177.0(4) . . . . ?
C1 C2 C3 C4 -0.6(7) . . . . ?
C2 C3 C4 C5 -1.9(8) . . . . ?
C1 N1 C5 C4 1.9(7) . . . . ?
Fe1 N1 C5 C4 177.3(3) . . . . ?
C3 C4 C5 N1 1.3(7) . . . . ?
N2 N3 C6 C8 178.4(4) . . . . ?
Fe1 N3 C6 C8 -11.9(6) . . . . ?
N2 N3 C6 C7 -1.5(6) . . . . ?
Fe1 N3 C6 C7 168.2(3) . . . . ?
N3 C6 C8 C9 -159.1(4) . . . . ?
C7 C6 C8 C9 20.8(6) . . . . ?
N3 C6 C8 C13 20.5(6) . . . . ?
C7 C6 C8 C13 -159.6(4) . . . . ?
C13 C8 C9 C10 0.0(7) . . . . ?
C6 C8 C9 C10 179.7(4) . . . . ?
C8 C9 C10 C11 0.0(7) . . . . ?
C8 C9 C10 Cl1 179.9(3) . . . . ?
C9 C10 C11 C12 -0.1(7) . . . . ?
Cl1 C10 C11 C12 180.0(3) . . . . ?
C10 C11 C12 C13 0.3(7) . . . . ?
C10 C11 C12 N4 -179.7(4) . . . . ?
O2 N4 C12 C11 147.8(4) . . . . ?
O3 N4 C12 C11 -31.1(6) . . . . ?
O2 N4 C12 C13 -32.2(6) . . . . ?
O3 N4 C12 C13 148.9(4) . . . . ?
Fe1 O1 C13 C12 146.6(3) . . . . ?
Fe1 O1 C13 C8 -38.3(6) . . . . ?
C11 C12 C13 O1 175.2(4) . . . . ?
N4 C12 C13 O1 -4.8(6) . . . . ?
C11 C12 C13 C8 -0.3(7) . . . . ?
N4 C12 C13 C8 179.7(4) . . . . ?
C9 C8 C13 O1 -175.1(4) . . . . ?
C6 C8 C13 O1 5.3(7) . . . . ?
C9 C8 C13 C12 0.2(6) . . . . ?
C6 C8 C13 C12 -179.5(4) . . . . ?
O4 C14 C15 C16 -74.6(5) . . . . ?
O5 C14 C15 C16 104.3(5) . . . . ?
O4 C14 C15 C17 99.5(5) . . . 5_755 ?
O5 C14 C15 C17 -81.6(5) . . . 5_755 ?
C17 C15 C16 C17 -1.0(7) 5_755 . . . ?
C14 C15 C16 C17 173.1(4) . . . . ?
C17 C15 C16 Br1 175.7(3) 5_755 . . . ?
C14 C15 C16 Br1 -10.2(5) . . . . ?
C15 C16 C17 C15 1.0(7) . . . 5_755 ?
Br1 C16 C17 C15 -175.6(3) . . . 5_755 ?
C15 C16 C17 Br2 -179.2(3) . . . . ?
Br1 C16 C17 Br2 4.1(5) . . . . ?

#==============================================================================
loop_
_geom_hbond_atom_site_label_D
_geom_hbond_atom_site_label_H
_geom_hbond_atom_site_label_A
_geom_hbond_site_symmetry_D
_geom_hbond_site_symmetry_H
_geom_hbond_site_symmetry_A
_geom_hbond_distance_DA
_geom_hbond_distance_DH
_geom_hbond_distance_HA
_geom_hbond_angle_DHA
_geom_hbond_publ_flag
N2 H6 O4 . . 6_555 2.892(5) 0.77(5) 2.16(5) 158(5) no
N2 H6 N3 . . . 1.398(5) 0.77(5) 1.91(5) 39(3) no

#==============================================================================
# Additional structures and associated data_? identifiers
# should be added at this point if there is more than one 
# structure analysis in the CIF.

_shelx_res_file
;

    shelxl.res created by SHELXL-2014/7

TITL fr1372
CELL  0.71075 12.59540 30.85080 9.60750 90.00000 95.94480 90.00000
ZERR  4 0.00310 0.00740 0.00240 0.00000 0.00520 0.00000
LATT 7
SYMM    -X,    +Y, .50-Z
SFAC C H N O FE CL BR
UNIT 136 84 32 40 4 8 16
L.S. 10
FMAP 2
PLAN 50
WPDB -2
HTAB
BOND $H
CONF
LIST 4
TEMP -149.8
ACTA
SIZE 0.200 0.200 0.200
WGHT    0.009600   30.924999
FVAR       0.43676
BR1   7    0.812827    0.022433   -0.253228    11.00000    0.01744    0.02045 =
         0.01715   -0.00040   -0.00271    0.00084
BR2   7    0.947079    0.101723   -0.075794    11.00000    0.01826    0.01485 =
         0.01924    0.00137    0.00059   -0.00032
FE1   5    0.500000    0.155653   -0.250000    10.50000    0.01179    0.01400 =
         0.01515    0.00000    0.00243    0.00000
CL1   6    0.859582    0.333460   -0.254634    11.00000    0.02255    0.02149 =
         0.03207    0.00077    0.00471   -0.00751
O1    4    0.559892    0.196946   -0.124863    11.00000    0.01591    0.02055 =
         0.01805   -0.00341    0.00431   -0.00442
O2    4    0.458276    0.261389   -0.019998    11.00000    0.01937    0.03976 =
         0.05419   -0.02381    0.01468   -0.00929
O3    4    0.572895    0.304378    0.092087    11.00000    0.02717    0.01957 =
         0.01981   -0.00546    0.00094    0.00243
O4    4    0.781763   -0.074529   -0.089940    11.00000    0.01316    0.02534 =
         0.02385   -0.00204    0.00555   -0.00531
O5    4    0.904607   -0.092265   -0.232022    11.00000    0.01841    0.02365 =
         0.02130   -0.00718    0.00384   -0.00310
N1    3    0.456268    0.109668   -0.387255    11.00000    0.01764    0.01886 =
         0.01232    0.00217    0.00267   -0.00050
N2    3    0.635823    0.113826   -0.413578    11.00000    0.01404    0.01642 =
         0.02095   -0.00482    0.00467   -0.00252
N3    3    0.628910    0.152936   -0.341477    11.00000    0.01475    0.01230 =
         0.01342    0.00199    0.00137    0.00224
N4    3    0.546163    0.278343   -0.003159    11.00000    0.02089    0.01779 =
         0.02142   -0.00382    0.00174    0.00206
C1    1    0.538941    0.094929   -0.452861    11.00000    0.01398    0.01702 =
         0.01720    0.00150    0.00378   -0.00033
C2    1    0.526785    0.062067   -0.552822    11.00000    0.02055    0.02263 =
         0.02521   -0.00477    0.00559   -0.00369
AFIX  43
H1    2    0.586416    0.050774   -0.593883    11.00000   -1.20000
AFIX   0
C3    1    0.425107    0.046527   -0.590014    11.00000    0.03119    0.02996 =
         0.01921   -0.01208    0.00509   -0.00868
AFIX  43
H2    2    0.414100    0.024336   -0.658547    11.00000   -1.20000
AFIX   0
C4    1    0.338145    0.063089   -0.527916    11.00000    0.01482    0.03216 =
         0.02385   -0.00368    0.00111   -0.00792
AFIX  43
H3    2    0.267776    0.053059   -0.555372    11.00000   -1.20000
AFIX   0
C5    1    0.356848    0.094106   -0.426611    11.00000    0.00925    0.02934 =
         0.01962    0.00064    0.00090   -0.00655
AFIX  43
H4    2    0.298409    0.105111   -0.382375    11.00000   -1.20000
AFIX   0
C6    1    0.711550    0.178406   -0.330605    11.00000    0.01434    0.01790 =
         0.01157    0.00149    0.00153    0.00021
C7    1    0.811547    0.165467   -0.390548    11.00000    0.01520    0.02142 =
         0.01935   -0.00194    0.00055    0.00096
AFIX 137
H7B   2    0.802247    0.169400   -0.492300    11.00000   -1.20000
H8C   2    0.827207    0.134957   -0.368683    11.00000   -1.20000
H9A   2    0.870846    0.183548   -0.350018    11.00000   -1.20000
AFIX   0
C8    1    0.703472    0.219903   -0.258421    11.00000    0.01424    0.01639 =
         0.01412    0.00084   -0.00054    0.00133
C9    1    0.774285    0.253128   -0.284446    11.00000    0.01463    0.01821 =
         0.01736    0.00182    0.00024   -0.00166
AFIX  43
H10   2    0.826297    0.248250   -0.347615    11.00000   -1.20000
AFIX   0
C10   1    0.769674    0.292962   -0.219570    11.00000    0.01574    0.02092 =
         0.01956    0.00044   -0.00066   -0.00034
C11   1    0.694965    0.301103   -0.127244    11.00000    0.01796    0.01573 =
         0.02283   -0.00104   -0.00017    0.00066
AFIX  43
H11   2    0.691941    0.328487   -0.082604    11.00000   -1.20000
AFIX   0
C12   1    0.624719    0.268332   -0.101548    11.00000    0.01017    0.02010 =
         0.01482   -0.00219    0.00321    0.00214
C13   1    0.624778    0.226937   -0.163377    11.00000    0.01454    0.01854 =
         0.01364    0.00018    0.00079   -0.00078
C14   1    0.869467   -0.069677   -0.134611    11.00000    0.01592    0.01444 =
         0.01538    0.00121   -0.00178   -0.00049
C15   1    0.940429   -0.033362   -0.070279    11.00000    0.01178    0.01888 =
         0.01176   -0.00176    0.00407   -0.00386
C16   1    0.918377    0.009637   -0.103827    11.00000    0.00995    0.01815 =
         0.01464    0.00305   -0.00215   -0.00162
C17   1    0.976703    0.042718   -0.033609    11.00000    0.02193    0.01573 =
         0.01109    0.00183    0.00510    0.00063
H6    2    0.681641    0.109692   -0.459538    11.00000    0.01792
H12   2    1.000000   -0.088847   -0.250000    10.50000    0.14864
HKLF 4

REM  fr1372
REM R1 =  0.0513 for    3785 Fo > 4sig(Fo)  and  0.0598 for all    4242 data
REM    274 parameters refined using      0 restraints

END

WGHT      0.0096     30.9412

REM Instructions for potential hydrogen bonds
EQIV $1 x, -y, z-1/2
HTAB C2 O4_$1
EQIV $2 -x+1, -y, -z-1
HTAB C4 Br1_$2
EQIV $3 -x+1, y, -z-1/2
HTAB C5 Br2_$3
EQIV $4 -x+2, y, -z-1/2
HTAB C7 Br2_$4
EQIV $5 -x+3/2, -y+1/2, -z
HTAB C7 O3_$5
EQIV $6 x+1/2, -y+1/2, z-1/2
HTAB C9 O2_$6
HTAB N2 O4_$1
HTAB O5 O5_$4

REM Highest difference peak  0.683,  deepest hole -0.660,  1-sigma level  0.152
Q1    1   0.8789  0.1310 -0.0405  11.00000  0.05    0.68
Q2    1   0.7436 -0.0075 -0.2186  11.00000  0.05    0.65
Q3    1   0.8248  0.0200 -0.3785  11.00000  0.05    0.62
Q4    1   0.7421 -0.0413 -0.2050  11.00000  0.05    0.57
Q5    1   0.8541  0.1090 -0.1308  11.00000  0.05    0.55
Q6    1   0.9328  0.1017 -0.2103  11.00000  0.05    0.54
Q7    1   0.6349  0.2192 -0.2492  11.00000  0.05    0.52
Q8    1   0.7082  0.0223 -0.6401  11.00000  0.05    0.52
Q9    1   0.8204  0.0599 -0.1852  11.00000  0.05    0.51
Q10   1   0.8654  0.1997 -0.5190  11.00000  0.05    0.51
Q11   1   0.8374  0.0217 -0.1182  11.00000  0.05    0.51
Q12   1   0.9032  0.0215 -0.3424  11.00000  0.05    0.50
Q13   1   0.3988  0.0194 -0.7226  11.00000  0.05    0.50
Q14   1   0.4108  0.1031 -0.4285  11.00000  0.05    0.50
Q15   1   1.0174  0.1223 -0.1374  11.00000  0.05    0.49
Q16   1   0.5749  0.1876 -0.1834  11.00000  0.05    0.49
Q17   1   0.2657  0.0310 -0.5915  11.00000  0.05    0.48
Q18   1   0.6758  0.1512 -0.2646  11.00000  0.05    0.48
Q19   1   0.7985  0.0526 -0.1345  11.00000  0.05    0.48
Q20   1   1.0000 -0.1593 -0.2500  10.50000  0.05    0.48
Q21   1   0.4761  0.2279 -0.0914  11.00000  0.05    0.48
Q22   1   1.0034  0.0886 -0.2049  11.00000  0.05    0.47
Q23   1   1.0422  0.0627 -0.2122  11.00000  0.05    0.47
Q24   1   0.2860  0.0299 -0.6966  11.00000  0.05    0.47
Q25   1   0.7230  0.2233 -0.4151  11.00000  0.05    0.47
Q26   1   1.0000  0.1423 -0.2500  10.50000  0.05    0.47
Q27   1   0.7579  0.3503 -0.1303  11.00000  0.05    0.47
Q28   1   0.2266  0.0008 -0.4552  11.00000  0.05    0.47
Q29   1   0.3204  0.0183 -0.7540  11.00000  0.05    0.46
Q30   1   0.9309  0.0284 -0.0589  11.00000  0.05    0.46
Q31   1   0.1815  0.0594 -0.4837  11.00000  0.05    0.46
Q32   1   0.8204 -0.0412 -0.0166  11.00000  0.05    0.46
Q33   1   0.9681  0.2988 -0.2817  11.00000  0.05    0.46
Q34   1   0.8785  0.0782 -0.0238  11.00000  0.05    0.46
Q35   1   0.2204  0.1200 -0.4152  11.00000  0.05    0.46
Q36   1   0.6805  0.0578 -0.3574  11.00000  0.05    0.46
Q37   1   0.6017  0.3623 -0.1180  11.00000  0.05    0.46
Q38   1   0.5584  0.3211 -0.2395  11.00000  0.05    0.45
Q39   1   0.6334  0.2307 -0.0743  11.00000  0.05    0.45
Q40   1   0.4238  0.1317 -0.2504  11.00000  0.05    0.45
Q41   1   0.3388  0.2793 -0.0185  11.00000  0.05    0.45
Q42   1   0.5815 -0.0103 -0.6383  11.00000  0.05    0.44
Q43   1   0.4395  0.1200 -0.6139  11.00000  0.05    0.44
Q44   1   1.0168  0.0721 -0.1206  11.00000  0.05    0.44
Q45   1   0.2168  0.0346 -0.4507  11.00000  0.05    0.44
Q46   1   0.8145 -0.1023 -0.3352  11.00000  0.05    0.44
Q47   1   0.5000  0.0475 -0.2500  10.50000  0.05    0.44
Q48   1   0.8307  0.3455 -0.0457  11.00000  0.05    0.44
Q49   1   0.9343  0.1457 -0.5854  11.00000  0.05    0.44
Q50   1   0.7462  0.0734 -0.4234  11.00000  0.05    0.44
;

_shelx_res_checksum   42134

_shelx_hkl_file
;
   0   0  -2 3279.33   84.06
   0   0   2 2922.53   78.94
   0   0   2 3105.83   66.62
   0   0  -2 3035.33   62.49
   0   0  -3    5.61   18.63
   0   0   3   33.82   18.29
   0   0   3   27.90   11.50
   0   0  -3   32.42   17.53
   0   0   4 4570.99  217.42
   0   0  -4 3869.99  127.61
   0   0   4 4536.89  144.92
   0   0  -4 4400.59  134.18
   0   0  -5   46.39   26.89
   0   0  -5   16.67   23.09
   0   0  -5   43.42   23.81
   0   0  -652927.15 1675.08
   0   0  -656253.58 1765.94
   0   0  -657084.29 6259.71
   0   0  -7   13.05   21.57
   0   0  -8 5266.49  244.57
   0   0  -8 4885.37  230.77
   0   0  -9   58.63   41.80
   0   0 -10 3461.99  218.23
   0   0 -11   16.40   32.27
   0   0 -12 5838.31  667.45
   0   2  -2  690.44   96.83
   0   2   2  638.84   72.97
   0   2  -2  552.66   39.78
   0   2  -2  511.23   34.15
   0  -2  -2  522.33   39.03
   0  -2  -2  583.89   71.65
   0  -2   2  456.68   30.31
   0   2   316480.95  304.96
   0   2  -315608.06  293.05
   0   2  -316005.16  277.55
   0   2  -315381.99  275.99
   0  -2  -316505.19  291.38
   0  -2   316396.79  285.12
   0  -2  -315230.24  274.21
   0   2  -4 1913.77  154.16
   0   2   4 1650.70  135.96
   0   2  -4 1674.23  123.62
   0   2  -4 1550.55  115.71
   0  -2   4 1634.60  131.70
   0  -2  -4 1789.86  132.57
   0  -2  -4 1446.87  109.08
   0   2  -5 1984.59  300.97
   0   2   5 2057.52  209.09
   0   2  -5 1992.85  173.21
   0   2  -5 1922.60  167.42
   0  -2   5 1892.68  172.52
   0  -2  -5 2007.74   78.13
   0  -2  -5 2004.38  116.55
   0   2  -610198.94  334.12
   0   2  -6 8193.92  286.74
   0   2  -6 9577.75  321.91
   0  -2  -6 9306.40  308.93
   0  -2  -610410.63  351.71
   0   2  -7  471.38  137.12
   0   2  -7  989.35   99.97
   0   2  -7  648.95  124.73
   0  -2  -7  843.97   66.25
   0  -2  -7  884.41   77.58
   0   2  -8   28.89   45.00
   0   2  -8   59.81   32.54
   0  -2  -8   23.48   27.60
   0  -2  -8  102.84   39.01
   0  -2  -8   39.45   29.02
   0   2  -9  750.50   89.97
   0   2  -9  690.78   80.27
   0  -2  -9  847.97  110.55
   0   2 -10 1202.88  145.90
   0  -2 -10 1214.26   67.66
   0  -2 -10 1342.41  120.91
   0   2 -11 2173.30  180.48
   0  -2 -11 2140.37  176.88
   0  -2 -12  204.11  121.38
   0   4   1   84.42   12.72
   0   4  -1   33.62   14.20
   0   4  -1   64.29   20.16
   0  -4   1   52.68   11.06
   0  -4   1   40.90    8.90
   0  -4  -1   44.25    5.74
   0   4   2 6576.62  124.34
   0   4  -2 6324.98  121.21
   0   4  -2 6184.82  109.08
   0  -4  -2 5648.77  114.20
   0  -4   2 5752.51  102.70
   0   4  -3 3308.35   97.01
   0   4   3 2952.65   95.94
   0   4  -3 3472.08   70.14
   0   4  -3 3612.44  103.03
   0  -4  -3 3322.12   82.51
   0  -4   3 3331.37   71.51
   0  -4  -3 3148.20   70.21
   0   4  -4 8764.80  276.02
   0   4   4 9070.77  299.75
   0   4  -4 8135.60  232.92
   0   4  -4 8854.80  260.84
   0  -4  -4 8698.35  264.78
   0  -4   4 8619.60  248.52
   0  -4  -4 9819.19  288.21
   0   4   5 7979.85  261.30
   0   4  -5 8201.54  298.85
   0   4  -5 8258.07  237.40
   0   4  -5 7838.67  218.81
   0  -4   5 7936.54  224.43
   0  -4  -5 7862.44  228.47
   0   4   6 1897.44  208.22
   0   4  -6 1818.62  120.11
   0   4  -6 1680.63   89.85
   0   4  -6 1627.94   84.34
   0  -4  -6 1576.14   84.77
   0  -4   6 1507.76  206.39
   0  -4  -6 2207.67  115.15
   0   4  -7  730.73  112.80
   0   4  -7  573.41  114.74
   0   4  -7  550.94  100.90
   0  -4  -7  747.37   77.12
   0  -4  -7  724.01   67.92
   0  -4  -7  634.89   78.70
   0   4  -8 4887.68  231.29
   0   4  -8 4394.58  205.14
   0  -4  -8 3991.38  192.10
   0  -4  -8 4743.79  218.28
   0   4  -9   12.42   28.47
   0   4  -9   21.57   18.94
   0  -4  -9   -5.59   21.07
   0  -4  -9   72.03   36.94
   0   4 -10  221.54   70.17
   0  -4 -10  129.83   36.98
   0  -4 -10  159.63   52.12
   0   4 -11  503.05  169.04
   0  -4 -11  399.12  163.15
   0  -4 -11  319.30  140.17
   0   4 -12   80.43   33.40
   0  -4 -12   99.38   45.88
   0   6   0 1795.11  103.65
   0   6   0 1861.64  107.53
   0  -6   0 1726.12  100.36
   0  -6   0 1850.69  106.24
   0   6   1   37.18   13.42
   0   6  -1   45.69   14.74
   0   6  -1   83.45   26.05
   0  -6   1   36.36   26.81
   0  -6   1   28.97   12.48
   0  -6  -1   30.12   12.53
   0  -6  -1   28.68   13.17
   0   6   261936.91 4280.18
   0   6  -253946.90 3727.56
   0   6  -256516.36 3907.36
   0  -6   252677.98 3641.86
   0  -6   250789.02 3509.62
   0  -6  -257607.75 3980.44
   0   6   335946.91  612.16
   0   6  -334833.23  584.24
   0   6  -337459.56  638.95
   0  -6  -334513.74  595.30
   0  -6   337478.04  630.78
   0  -6  -345589.15 3151.79
   0   6  -4 6507.43  217.74
   0   6   4 7490.83  234.57
   0   6  -4 7112.96  203.38
   0   6  -4 7300.60  221.78
   0  -6  -4 6636.21  206.81
   0  -6   4 6548.34  188.56
   0  -6  -4 7380.31  216.00
   0   6   5   60.98   26.11
   0   6  -5   63.67   49.81
   0   6  -5   59.35   15.63
   0   6  -5  159.32   34.27
   0  -6   5   70.50   19.60
   0  -6  -5   20.14   25.06
   0  -6  -5   19.53   17.24
   0   6   6  412.36   62.69
   0   6  -6  309.39   92.29
   0   6  -6  353.16   61.62
   0   6  -6  422.33   60.78
   0  -6  -6  242.46   41.46
   0  -6   6  288.78   65.83
   0  -6  -6  415.15   55.03
   0   6  -7  840.40   70.53
   0   6  -7  801.79   72.01
   0  -6   7  650.48  116.20
   0  -6  -7  779.18   78.05
   0  -6  -7  729.28   66.06
   0   6  -810811.81  487.73
   0   6  -810335.44  458.14
   0  -6  -8 9254.31  416.40
   0  -6  -8 9381.46  415.67
   0   6  -9 4625.75  280.11
   0   6  -9 4521.02  266.81
   0  -6  -9 4271.76  253.22
   0  -6  -9 4846.01  308.26
   0   6 -10 2679.06  175.02
   0  -6 -10 2609.57  161.17
   0  -6 -10 2793.79  173.45
   0   6 -11   22.15   37.68
   0  -6 -11   31.45   32.81
   0   6 -12  439.55  121.82
   0  -6 -12  257.10  100.59
   0   8   0  240.87   38.02
   0   8   0  202.33   26.27
   0  -8   0   68.32   21.42
   0  -8   0  147.48   25.85
   0   8   1 4353.32   81.30
   0   8  -1 4427.02   85.52
   0   8  -1 4298.87   91.93
   0  -8   1 4374.84   90.79
   0  -8   1 4326.73   85.16
   0  -8  -1 4484.13   85.62
   0  -8  -1 4248.48   95.06
   0   8   2  455.78   45.52
   0   8  -2  422.14   39.42
   0   8  -2  560.22   77.97
   0  -8   2  465.85   72.18
   0  -8   2  402.42   29.35
   0  -8  -2  404.64   27.11
   0  -8  -2  367.05   36.78
   0   8   337683.83  636.25
   0   8  -340651.43  680.45
   0   8  -342364.38 2931.73
   0  -8  -338310.28  661.52
   0  -8   340861.44 2824.82
   0  -8  -343542.79 3009.72
   0   8  -4 1741.59  264.46
   0   8   4 1462.35  110.71
   0   8  -4 1606.24  114.81
   0   8  -4 1742.82  131.55
   0  -8  -4 1471.46  124.38
   0  -8   4 1505.59  109.56
   0  -8  -4 1608.08  114.66
   0   8   5  177.30   44.07
   0   8  -5  187.83   56.91
   0   8  -5  117.25   21.27
   0   8  -5   64.31   27.74
   0  -8  -5   71.69   33.45
   0  -8   5  110.61   21.93
   0  -8  -5  192.16   35.88
   0   8   6 1346.83  203.90
   0   8  -6  883.11  206.05
   0   8  -6 1340.10  151.16
   0   8  -6 1132.67  134.52
   0  -8  -6  872.30  158.59
   0  -8   6 1078.07  140.06
   0  -8  -6 1678.17  119.82
   0   8   7 2082.21  241.87
   0   8  -7 2081.15  175.36
   0   8  -7 2022.61  154.50
   0  -8  -7 2357.84  231.34
   0  -8   7 2026.21  163.67
   0   8  -8   45.79   45.57
   0   8  -8   19.01   18.03
   0  -8  -8   13.98    9.57
   0  -8  -8   13.81   13.78
   0  -8  -8    2.13   23.93
   0   8  -9 9900.07  651.89
   0  -8  -910614.43  695.92
   0  -8  -9 9415.31  612.12
   0  -8  -910074.97  662.37
   0   8 -10   88.40   51.04
   0  -8 -10   21.96   29.01
   0  -8 -10  103.93   51.81
   0   8 -11  160.62   75.21
   0  -8 -11   65.55   42.89
   0  10   0 9041.63  166.73
   0  10   0 8893.50  164.14
   0 -10   0 8317.94  156.85
   0 -10   0 8882.33  163.72
   0  10   121756.20  371.23
   0  10  -122252.66  389.37
   0  10  -121690.89  371.40
   0 -10  -122170.80  378.97
   0 -10   121857.82  380.09
   0 -10   121707.93  372.57
   0 -10  -122480.12  392.57
   0  10   2 3935.22   76.67
   0  10  -2 3614.33   71.43
   0  10  -2 3496.09   83.16
   0 -10   2 3729.26   86.76
   0 -10   2 3614.90   73.97
   0 -10  -2 3748.82   73.14
   0 -10  -2 3809.19   91.16
   0  10   3 9758.10  277.77
   0  10  -3 8520.17  240.10
   0  10  -3 8977.94  269.34
   0 -10   3 8291.91  243.13
   0 -10   3 9139.72  259.44
   0 -10  -3 8780.27  250.44
   0 -10  -3 9073.01  269.42
   0  10  -4 6718.21  359.24
   0  10   4 8661.23  245.59
   0  10  -4 7595.85  206.97
   0  10  -4 7739.11  226.05
   0 -10  -4 7200.25  214.67
   0 -10   4 7370.59  203.37
   0 -10  -4 8301.93  225.79
   0 -10  -4 8230.52  239.19
   0  10  -5 8525.39  351.02
   0  10   5 9023.71  298.96
   0  10  -510592.15  338.00
   0  10  -5 9395.09  315.75
   0 -10  -5 8947.59  304.64
   0 -10   5 9354.91  301.31
   0 -10  -510374.63  331.17
   0 -10  -510336.41  344.38
   0  10   6 6789.50  339.41
   0  10  -6 6310.20  263.41
   0  10  -6 6080.71  242.94
   0 -10  -6 5961.88  238.38
   0 -10   6 5871.07  237.34
   0 -10  -6 6207.99  260.24
   0  10   7 6983.34  374.73
   0  10  -7 6607.18  249.96
   0  10  -7 6615.87  230.94
   0 -10  -7 6311.80  222.24
   0 -10   7 6239.47  221.05
   0 -10  -7 6520.50  246.23
   0  10  -8 1757.43  217.14
   0  10  -8 1651.99  197.69
   0 -10  -8 1677.96  188.60
   0 -10  -8 1832.04  248.36
   0  10  -9 3257.47  351.09
   0 -10  -9 3050.19  205.34
   0 -10  -9 3536.98  249.81
   0  10 -10  630.10  110.88
   0 -10 -10  380.38   85.15
   0 -10 -10  418.02  117.68
   0  10 -11 1909.80  311.65
   0 -10 -11 2132.05  345.75
   0  10 -12  142.73   55.20
   0  12   0 4995.45  104.50
   0  12   0 5202.32  107.83
   0 -12   0 5209.56  111.65
   0 -12   0 5147.90  105.01
   0  12   118507.56  320.00
   0  12  -119223.01  333.96
   0 -12   119466.28  343.12
   0 -12  -118469.71  328.37
   0 -12   118676.90  326.29
   0 -12  -119486.81  342.74
   0  12   2 3328.51  107.38
   0  12  -2 3238.71   98.84
   0  12  -2 3648.53  151.34
   0 -12   2 3350.63  110.36
   0 -12   2 3206.68  105.06
   0 -12  -2 3325.18  100.66
   0 -12  -2 3492.82  120.22
   0  12   315834.52  442.80
   0  12  -317709.52  493.64
   0  12  -316738.59  479.38
   0 -12   315740.52  450.29
   0 -12   317142.81  479.31
   0 -12  -318593.19  517.72
   0 -12  -318316.78  524.54
   0  12  -4 1292.72  311.07
   0  12   4 1287.81  145.64
   0  12  -4 1280.37  145.78
   0  12  -4 1533.37  101.25
   0 -12  -4 1055.79  140.11
   0 -12   4 1343.18   54.72
   0 -12  -4 1357.98   57.23
   0 -12  -4 1580.42  128.25
   0  12  -511184.70  490.98
   0  12   512885.74  528.38
   0  12  -513796.08  556.95
   0  12  -513512.06  560.50
   0 -12  -512407.98  516.68
   0 -12   514385.91  583.29
   0 -12  -513660.48  552.67
   0 -12  -514019.42  577.51
   0  12   6  981.71  145.77
   0  12  -6 1258.01  111.22
   0  12  -6 1134.81   82.45
   0 -12  -6 1222.83   89.09
   0 -12   6 1081.76   81.71
   0 -12  -6 1237.27  139.11
   0  12   7 4142.54  250.49
   0  12  -7 4284.41  185.18
   0  12  -7 4688.08  167.15
   0 -12  -7 4446.31  161.62
   0 -12   7 4081.85  156.50
   0 -12  -7 4579.36  181.16
   0  12  -8  205.53   72.86
   0  12  -8   92.18   31.07
   0 -12  -8  168.54   46.12
   0 -12   8   50.49   27.43
   0 -12  -8  346.35  102.69
   0  12  -9  346.29   80.96
   0 -12  -9  208.96   52.94
   0 -12  -9  189.36   65.45
   0  12 -10  237.07   67.50
   0 -12 -10  282.43   88.47
   0  12 -11  751.26  287.87
   0 -12 -11  622.83  229.46
   0  14   014483.66  414.86
   0  14   016740.18  473.83
   0 -14   016082.35  457.86
   0 -14   016170.87  457.83
   0  14   1 8467.65  243.69
   0  14  -1 8694.87  257.15
   0  14  -1 9079.51  262.24
   0 -14   1 9062.63  265.21
   0 -14   1 8868.34  260.60
   0 -14  -1 9124.21  269.59
   0 -14  -1 9255.51  266.40
   0  14   2  586.71   46.44
   0  14  -2  506.70   62.85
   0  14  -2  637.56   62.61
   0 -14   2  622.34   56.65
   0 -14   2  710.79   86.09
   0 -14  -2  633.27   52.15
   0 -14  -2  690.52   85.15
   0  14   3  853.51   63.72
   0  14  -3  905.56   82.06
   0  14  -3  975.36   85.45
   0 -14   3  937.28   96.72
   0 -14   3  971.87   73.72
   0 -14  -3  981.98   74.00
   0 -14  -3 1136.26  147.79
   0  14  -4    5.53   28.54
   0  14   4   53.65   17.53
   0  14  -4    6.25    7.89
   0  14  -4  102.50   40.06
   0 -14  -4   40.69   23.96
   0 -14   4    7.13    9.90
   0 -14  -4   83.50   18.56
   0 -14  -4   46.98   32.50
   0  14   5 5431.32  224.68
   0  14  -5 5060.56  217.07
   0  14  -5 4922.16  196.02
   0 -14  -5 5110.94  202.85
   0 -14   5 5271.55  212.48
   0 -14  -5 5659.62  297.46
   0  14   6 6680.58  349.30
   0  14  -6 7709.84  407.12
   0  14  -6 7590.17  386.80
   0 -14  -6 7587.14  390.05
   0 -14   6 7178.73  367.71
   0 -14  -6 7258.68  385.77
   0  14   7 1396.27  252.01
   0  14  -7 1595.05  203.50
   0  14  -7 1493.44  185.08
   0 -14  -7 1687.76  460.84
   0 -14   7 1685.00  459.26
   0 -14  -7 1717.91  472.26
   0  14   8  604.43  168.75
   0  14  -8  900.31  151.74
   0  14  -8  990.93  104.42
   0 -14   8  892.20   95.73
   0 -14  -8 1278.83  198.18
   0  14  -9  732.67   84.92
   0 -14  -9  615.93  124.97
   0 -14  -9  821.75  130.99
   0  14 -10  101.82   47.52
   0 -14 -10   75.09   44.21
   0  14 -11 2293.94  344.56
   0 -14 -11 2817.68  341.59
   0  16   027797.74  748.14
   0  16   027791.89  747.62
   0 -16   027605.75  743.53
   0 -16   026231.73  705.75
   0  16   1 1257.84  111.41
   0  16  -1 1681.07  140.24
   0  16  -1 1433.44  141.57
   0 -16   1 1420.88  109.01
   0 -16   1 1507.22  126.95
   0 -16  -1 1822.45  210.09
   0 -16  -1 1645.16  138.23
   0  16   2 5974.65  169.70
   0  16  -2 5652.24  172.73
   0  16  -2 5661.71  162.57
   0 -16  -2 5808.47  166.53
   0 -16   2 5946.33  177.79
   0 -16  -2 5853.52  180.31
   0 -16   2 5761.45  166.83
   0  16   317498.34  554.34
   0  16  -316751.59  531.09
   0  16  -317254.62  558.07
   0 -16   315148.40  489.15
   0 -16   318546.17  589.15
   0 -16  -316086.00  510.50
   0 -16  -317104.57  554.51
   0  16   410251.62  419.92
   0  16  -4 8896.26  375.68
   0  16  -4 8999.85  366.81
   0 -16  -4 9853.01  400.70
   0 -16   4 8653.64  354.38
   0 -16  -4 9101.45  384.17
   0  16   5 2198.58  162.27
   0  16  -5 1995.07  217.93
   0  16  -5 1860.62  131.66
   0 -16  -5 1845.94  134.97
   0 -16   5 1732.05  124.94
   0 -16  -5 1961.71  234.02
   0  16  -611601.19  413.93
   0  16  -612034.59  407.87
   0 -16  -612741.44  430.79
   0 -16   611776.83  402.21
   0 -16  -612154.82  431.68
   0  16   7 2323.98  307.58
   0  16  -7 2711.02  156.27
   0  16  -7 2693.06  617.82
   0 -16  -7 2888.14  168.35
   0 -16  -7 3112.84  202.58
   0  16   8  422.36  106.13
   0  16  -8  633.03  116.27
   0 -16   8  407.79   92.91
   0 -16  -8  682.98  123.16
   0  16  -9 4151.93  264.03
   0 -16  -9 4160.46  255.54
   0  16 -10 2461.04  339.63
   0 -16 -10 2382.49  207.87
   0  16 -11   77.17   50.43
   0 -16 -11  112.47   56.19
   0  18   0 1034.31  122.98
   0 -18   0  786.14   81.14
   0 -18   0  841.65   81.92
   0  18   1  304.23   56.55
   0  18  -1  386.15   68.47
   0  18  -1  283.46   44.07
   0 -18   1  236.04   50.62
   0 -18  -1  207.73   43.60
   0 -18   1  257.77   39.87
   0 -18  -1  292.22   34.95
   0  18   2 3461.95  121.33
   0  18  -2 3976.87  148.61
   0  18  -2 3825.55  133.88
   0 -18  -2 3891.37  135.27
   0 -18   2 3535.33  135.38
   0 -18  -2 3567.92  135.57
   0 -18   2 3732.90  137.74
   0  18   4  554.38  117.24
   0  18  -4  666.45   70.13
   0  18  -4  577.11  138.02
   0 -18  -4  628.16   83.59
   0 -18   4  612.81   78.94
   0 -18  -4  855.31  120.88
   0  18   5  992.57   84.66
   0  18  -5 1030.82  123.06
   0  18  -5  972.57   76.29
   0 -18  -5 1165.59   89.82
   0 -18   5  915.36   78.73
   0 -18  -5  824.97   85.36
   0  18   6   61.84   26.87
   0  18  -6   72.90   43.02
   0  18  -6    4.67    7.60
   0 -18  -6   10.11    9.43
   0 -18   6   84.84   32.32
   0 -18  -6   12.34   19.08
   0  18   7  163.75   51.29
   0  18  -7   88.44   54.29
   0  18  -7  135.97   31.74
   0 -18  -7  141.53   47.21
   0 -18   7  176.46   46.11
   0 -18  -7  215.48   77.06
   0  18   8  300.72  103.59
   0  18  -8  738.45  158.02
   0 -18  -8  913.71  133.08
   0  18  -9  748.92  189.45
   0 -18  -9  584.59  170.86
   0  18 -10  289.91   87.89
   0 -18 -10  185.41   68.18
   0  18 -11  174.01   86.56
   0 -18 -11  125.63   58.06
   0  20   0 1339.48  179.67
   0 -20   0 1157.49  134.88
   0 -20   0 1503.32  195.76
   0  20   1 1508.09  197.37
   0  20  -1 1566.01  126.24
   0  20  -1 1469.83  188.14
   0 -20  -1 1313.30  150.44
   0 -20   1 1730.99  140.45
   0 -20  -1 1404.05  168.05
   0 -20   1 1242.50  143.58
   0  20   2 7816.54  312.13
   0  20  -2 8636.56  353.60
   0  20  -2 8244.07  329.35
   0 -20   2 8164.77  331.85
   0 -20   2 7472.38  303.25
   0 -20  -2 8217.43  338.14
   0 -20  -2 8975.22  358.39
   0  20   3   15.90    6.19
   0  20  -3   66.44   34.60
   0  20  -3   45.24   21.13
   0 -20  -3   19.61   14.07
   0 -20  -3   38.10   26.83
   0 -20   3    3.30   15.40
   0  20   4 5207.92  269.82
   0  20  -4 5675.82  314.28
   0  20  -4 5262.91  272.47
   0 -20  -4 5856.62  302.64
   0 -20  -4 5486.09  296.78
   0 -20   4 5715.79  295.95
   0  20   5  367.60   84.12
   0  20  -5  676.08   82.63
   0  20  -5  438.01   93.11
   0 -20   5  361.19   92.02
   0 -20  -5  371.24   91.98
   0 -20  -5  480.73   75.60
   0  20   6  154.00   57.45
   0  20  -6  256.94   60.77
   0  20  -6  158.07   55.36
   0 -20  -6  193.34   47.36
   0 -20   6  261.07   46.94
   0 -20  -6  100.66   48.52
   0  20   7 1756.25  173.44
   0  20  -7 1803.42  182.40
   0 -20   7 1638.79  153.97
   0 -20  -7 1755.05  224.76
   0  20  -8 4121.01  260.09
   0 -20  -8 4298.95  271.75
   0  20  -9   65.98   47.69
   0 -20  -9   19.48   38.95
   0  20 -10  380.17  222.57
   0 -20 -10  775.42  183.21
   0  22   011016.14  440.78
   0 -22   010312.77  412.81
   0 -22   010739.69  432.24
   0  22   1 5526.61  226.97
   0  22  -1 6131.89  259.52
   0 -22   1 5496.47  229.25
   0 -22   1 6140.65  292.18
   0 -22  -1 5729.88  243.47
   0  22   2 8688.59  455.94
   0  22  -2 9818.72  510.90
   0  22  -2 9832.08  504.67
   0 -22  -2 9946.44  510.49
   0 -22  -2 9493.38  499.50
   0 -22   2 8691.64  450.93
   0  22   3 3153.66  171.42
   0  22  -3 3116.06  202.84
   0  22  -3 3332.43  178.40
   0 -22  -3 3250.57  174.32
   0 -22  -3 3032.60  227.49
   0 -22   3 2880.92  159.19
   0  22   4 3049.03  114.53
   0  22  -4 3168.16  141.22
   0  22  -4 3316.69  125.33
   0 -22  -4 3408.50  128.33
   0 -22  -4 3208.26  140.58
   0 -22   4 3311.43  126.47
   0  22   5 2812.16  181.50
   0  22  -5 3047.41  194.06
   0 -22  -5 3208.96  186.39
   0 -22   5 3157.41  187.44
   0 -22  -5 2797.59  179.99
   0  22   6 5286.22  310.44
   0  22  -6 5195.17  355.60
   0 -22  -6 5238.65  301.21
   0 -22   6 4388.86  257.40
   0 -22  -6 4760.83  291.00
   0  22  -7 1796.33  135.65
   0 -22   7 1540.40  152.25
   0 -22  -7 1434.79  189.00
   0  22  -8 4233.38  308.31
   0 -22  -8 4557.00  268.84
   0  22  -9  676.63  211.12
   0 -22  -9  547.84  159.37
   0  22 -10 1385.41  178.98
   0 -22 -10 1507.15  197.68
   0  24   012295.50  631.76
   0 -24   010949.78  563.51
   0 -24   011760.00  610.81
   0  24   1  364.86   97.15
   0  24  -1  354.69   96.20
   0 -24  -1  182.37   60.28
   0 -24   1  369.78   86.46
   0 -24  -1  456.21   64.32
   0  24   2  111.44   40.97
   0  24  -2   98.35   41.26
   0  24  -2  110.09   33.82
   0 -24  -2   45.43   15.07
   0 -24  -2  119.63   46.69
   0 -24   2   66.14   37.90
   0  24   3 3267.42  155.68
   0  24  -3 3628.56  184.06
   0  24  -3 3209.47  152.37
   0 -24  -3 3209.78  152.56
   0 -24  -3 3490.16  180.52
   0 -24   3 2959.02  162.19
   0  24   4   57.91   23.06
   0  24  -4   85.61   46.69
   0  24  -4   69.84   30.33
   0 -24  -4   57.33   28.37
   0 -24  -4   60.22   34.21
   0 -24   4    5.70   16.02
   0  24   5   91.32   27.69
   0  24  -5   21.75   48.37
   0  24  -5   19.07   13.79
   0 -24  -5   86.95   31.89
   0 -24  -5   61.98   31.46
   0 -24   5  102.37   40.54
   0  24   6 4341.33  293.40
   0  24  -6 3759.77  264.19
   0 -24   6 3395.17  225.85
   0 -24  -6 3451.58  243.19
   0  24  -7  956.57   74.51
   0 -24  -7  864.65   80.71
   0  24  -8   93.49   49.17
   0 -24  -8   86.16   67.32
   0  24  -9  732.72  179.93
   0 -24  -9  727.77  205.07
   0  26   0 3166.61  265.87
   0 -26   0 3017.19  265.93
   0  26   1 4906.17  254.03
   0  26  -1 5934.18  284.10
   0 -26   1 5581.51  260.87
   0 -26  -1 5398.87  256.16
   0  26   2 1065.78  135.37
   0  26  -2 1461.53  232.13
   0 -26  -2  667.72  111.51
   0 -26   2 1025.04  169.13
   0 -26  -2 1343.67  212.74
   0  26   3  383.92   92.85
   0  26  -3  713.69  125.11
   0 -26  -3  296.47   89.58
   0 -26   3  597.14  120.31
   0 -26  -3  496.78   92.58
   0  26   4 3046.17  183.25
   0  26  -4 3967.48  376.34
   0  26  -4 3269.35  194.74
   0 -26  -4 3257.61  232.30
   0 -26  -4 3504.33  222.96
   0 -26   4 3196.98  191.78
   0  26   5 2358.73  186.54
   0  26  -5 3543.01  424.08
   0 -26   5 2866.62  194.90
   0 -26  -5 3258.56  250.94
   0  26  -6 2832.68  188.62
   0 -26   6 2433.09  148.24
   0 -26  -6 2267.45  203.37
   0  26  -7 1378.86  208.85
   0 -26  -7 1061.68  165.41
   0  26  -8   71.86   47.32
   0 -26  -8   23.33   37.29
   0  26  -9   -2.25   49.84
   0 -26  -9   85.53   41.07
   0  28   0  886.52  121.06
   0 -28   0  932.08  148.93
   0  28   1   12.71   21.37
   0  28  -1   20.91   30.12
   0 -28   1   29.12   18.46
   0 -28  -1   41.79   30.69
   0  28   2 4735.56  280.50
   0  28  -2 5065.65  303.92
   0 -28   2 4930.61  293.36
   0 -28  -2 4799.66  291.10
   0  28   3 1139.37  162.63
   0  28  -3 2144.44  287.05
   0 -28   3 1250.54  140.25
   0 -28  -3 1579.57  178.09
   0  28   4 1993.56  189.97
   0  28  -4 2540.07  289.75
   0 -28   4 2041.81  197.23
   0 -28  -4 2580.09  192.29
   0  28   5  580.37  124.02
   0  28  -5  589.56  163.08
   0 -28   5  405.83  113.40
   0 -28  -5  390.32  111.94
   0  28  -6  626.89  124.04
   0 -28  -6  602.63  115.92
   0  28  -7  260.23  114.44
   0 -28  -7   91.84   46.38
   0  28  -8 2875.80  429.46
   0 -28  -8 3635.07  433.13
   0  30   0 3116.47  285.57
   0 -30   0 3039.73  327.74
   0  30   1 3329.37  231.25
   0  30  -1 3363.55  259.63
   0 -30   1 3236.20  260.50
   0 -30  -1 3342.82  297.93
   0  30   2 2782.92  193.96
   0  30  -2 3066.94  218.61
   0 -30   2 3103.62  217.14
   0 -30  -2 2714.20  196.46
   0  30   3 4051.57  250.77
   0  30  -3 4404.16  279.59
   0 -30   3 3805.31  237.08
   0 -30  -3 3821.49  245.30
   0  30   4  930.26  118.01
   0  30  -4 1846.37  247.62
   0 -30   4 1336.27   71.13
   0 -30  -4 1503.39  172.87
   0  30  -5 1117.20  168.96
   0 -30  -5 1229.92  188.70
   0  30  -6  616.44  225.76
   0 -30  -6 1139.33  223.49
   0  30  -7 1079.22  376.76
   0 -30  -7 1486.72  253.19
   0  30  -8  766.15  249.18
   0 -30  -8 1172.29  209.29
   0  32   0   33.33   33.06
   0 -32   0   10.54   20.93
   0  32   1  699.94  184.80
   0  32  -1  771.87  136.20
   0 -32   1  753.98  119.75
   0 -32  -1  856.56  143.45
   0  32   2   84.63   24.51
   0  32  -2   96.80   42.04
   0 -32   2   84.57   38.43
   0 -32  -2   94.84   54.03
   0  32   3 8454.89  462.65
   0  32  -3 9495.66  537.87
   0 -32   3 8818.66  482.13
   0 -32  -3 8925.49  498.41
   0  32   4  222.28   90.94
   0  32  -4  700.38  122.19
   0 -32   4  473.98   83.83
   0 -32  -4  547.02  104.32
   0  32  -5  149.76   74.91
   0 -32  -5  210.79   73.86
   0  32  -6  110.12   52.65
   0 -32  -6  165.30   65.25
   0  32  -7  320.11   98.79
   0 -32  -7  839.66  216.48
   0  34   0 3432.53  204.02
   0 -34   0 3502.04  212.50
   0  34  -1  266.98   80.74
   0  34   1  229.73   57.95
   0 -34   1  146.77   57.47
   0 -34  -1  201.96   59.12
   0  34   2  119.86   39.10
   0  34  -2  290.26  109.14
   0 -34   2  262.71   80.74
   0 -34  -2  391.52  103.31
   0  34   3  161.32   62.45
   0  34  -3  368.66   89.54
   0 -34   3  240.10   87.00
   0 -34  -3  343.88   98.33
   0  34  -4   90.40   36.95
   0 -34  -4   31.14   38.98
   0  34  -5  155.38   58.99
   0 -34  -5   18.25   45.19
   0  34  -6 1274.34  371.23
   0 -34  -6 1252.59  308.44
   0  36   0  101.03   53.17
   0 -36   0   23.82   29.06
   0  36   1 2106.29  251.86
   0  36  -1 3076.53  239.67
   0 -36   1 2377.04  331.92
   0 -36  -1 2576.83  296.35
   0  36   2  382.57  143.84
   0  36  -2  733.77  171.56
   0 -36   2  738.64  174.38
   0 -36  -2  537.30  117.02
   0  36  -3  140.97   35.37
   0 -36   3   86.04   41.80
   0 -36  -3   97.67   47.82
   0  36  -4  261.18   81.69
   0 -36  -4  269.30   83.19
   0  36  -5 4185.35  719.87
   0 -36  -5 3901.53  635.23
   0  38   0  159.35   54.37
   0 -38   0  165.74   66.92
   0  38  -1 1894.91  312.88
   0  38   1 2098.53  250.13
   0 -38  -1 1501.16  320.58
   0 -38   1 2352.54  284.94
   0  38  -2   86.68   41.75
   0  38   2  102.39   47.76
   0 -38   2  113.83   47.97
   0 -38  -2   98.32   63.43
   0  38  -3  232.93   78.84
   0 -38  -3  297.16  118.65
   0  40   0 2893.59  472.25
   0 -40   0 3418.40  556.29
   1   1 -12  206.67   78.14
   1   1 -12  343.03   85.98
   1  -1 -12  296.33   90.86
   1   1 -11  297.74   85.00
   1  -1 -11  287.71   71.14
   1   1 -10  287.21   71.21
   1  -1 -10  287.88   66.46
   1   1  -9 1575.91  208.25
   1  -1  -9 1242.76  149.09
   1  -1  -9 1506.82  163.82
   1   1  -8  819.71  150.66
   1   1  -8 1083.17  159.92
   1   1  -8 1151.12  145.84
   1  -1  -8 1076.48  146.71
   1  -1  -8 1083.12  155.20
   1  -1  -8  610.32  179.05
   1   1  -7   27.40   20.82
   1   1  -7   10.78   23.77
   1  -1  -7   76.25   31.97
   1  -1  -7   31.09   20.27
  -1  -1   7   51.08   23.24
   1  -1  -7   83.02   30.50
   1   1  -6 5134.41  204.16
   1   1  -6 4512.50  157.32
  -1   1   6 4417.81  169.12
   1   1  -6 4486.06  162.09
   1  -1  -6 3749.89  182.18
   1  -1  -6 4511.45  156.15
  -1  -1   6 4766.86  172.21
   1  -1  -6 4589.74  164.83
   1   1  -5 5773.03  187.98
   1   1  -5 4830.28  144.32
  -1   1   5 5010.10  165.49
   1   1  -5 5226.02  154.91
   1  -1  -5 6311.15  205.97
   1  -1  -5 5336.94  153.09
  -1  -1   5 5151.84  157.58
   1  -1  -5 5264.72  157.57
   1   1  -4 1746.24  126.06
   1   1  -4 1914.61  188.56
   1   1  -4 1774.43  130.11
  -1   1   4 2026.90  153.10
   1  -1  -4 2064.28  170.91
   1  -1  -4 1738.08  125.40
  -1  -1   4 1899.02  142.73
   1  -1  -4 1770.22  129.45
   1   1  -3  225.09   36.09
  -1   1   3  186.74   41.15
   1   1  -3  233.02   37.64
   1  -1  -3  254.90   45.30
   1  -1  -3  345.37   57.09
   1  -1  -3  208.20   35.13
  -1  -1   3  227.98   28.15
   1   1  -2 2994.05   62.32
   1   1  -2 3145.45   65.90
  -1   1   2 2986.19   68.53
  -1   1   2 2904.32   55.16
  -1  -1   2 3147.22   63.41
   1  -1  -2 2816.01  196.54
   1  -1  -2 2817.34  199.30
  -1  -1   2 3077.24   66.91
  -1   1  -2  126.06   21.93
  -1   1  -2  110.97   14.07
  -1   1  -2   45.45   26.75
   1   1   2  171.08   33.63
   1  -1   2  148.41   54.75
  -1  -1  -2  171.77   24.06
  -1  -1  -2  150.31   29.84
  -1   1  -3 2586.43  185.72
   1   1   3 2662.53  214.46
  -1   1  -3 2111.01  129.40
  -1  -1  -3 2605.90  188.71
   1  -1   3 2741.14  206.14
  -1  -1  -3 2398.43  138.26
  -1   1  -4 1708.51  124.90
   1   1   4 1962.25  221.23
  -1   1  -4 1583.60  125.62
  -1  -1  -4 1648.03  127.66
   1  -1   4 1568.81  133.86
  -1  -1  -4 1725.13  132.07
   1   1   5  171.87   73.42
  -1   1  -5  101.91   22.43
  -1   1  -5  140.05   41.96
  -1  -1  -5   50.66   25.45
  -1  -1  -5   71.44   26.31
   1  -1   5  160.69   56.71
  -1   1  -6 2364.71  126.74
   1   1   6 2859.94  297.94
  -1   1  -6 2662.01  121.30
   1  -1   6 2565.49  192.20
  -1  -1  -6 2878.52  134.42
  -1  -1  -6 2911.94  186.24
   1   1   7  100.39   66.06
  -1   1  -7   -0.72   16.44
  -1   1  -7   43.46   32.80
  -1  -1  -7   31.82   38.01
  -1  -1  -7   55.09   33.11
  -1   1  -8   87.73   40.51
  -1   1  -8   32.32   21.20
  -1   1  -8   56.78   32.76
  -1  -1  -8   63.84   30.29
  -1  -1  -8   41.34   31.90
  -1  -1  -8   -2.22   22.85
  -1   1  -9 1829.17  196.11
  -1   1  -9 1887.93  223.67
  -1  -1  -9 1900.12  216.79
  -1  -1  -9 1598.17  184.29
  -1   1 -10  456.73  136.77
  -1  -1 -10  430.13   97.19
  -1  -1 -10  218.39   87.04
  -1   1 -11  110.34   55.80
  -1   1 -11   83.04   37.87
  -1  -1 -11    0.50   32.96
  -1  -1 -11   14.39   32.65
  -1   1 -12  198.27   99.05
  -1  -1 -12  285.09  107.62
   1   3 -12  337.78  112.09
   1  -3 -12  628.39  150.95
   1   3 -11  643.31  176.32
   1  -3 -11  649.07  136.73
   1   3 -10 2537.39  162.26
   1  -3 -10 2223.10  146.26
   1   3  -9   87.92   45.08
   1  -3  -9   69.07   42.27
   1  -3  -9  137.71   41.45
   1   3  -8 4747.29  235.39
   1   3  -8 5442.86  252.31
   1   3  -8 5902.89  274.90
   1  -3  -8 5686.27  258.76
  -1  -3   8 6101.78  284.83
   1  -3  -8 6362.70  303.89
   1   3  -7  502.69   92.49
   1   3  -7  554.40  125.56
   1   3  -7  401.76   91.77
   1  -3  -7  535.70  120.04
   1  -3  -7  555.58  136.66
   1  -3  -7  556.46  124.41
  -1  -3   7  411.57  100.96
   1   3  -6 3439.02  325.58
   1   3  -6 3343.59  159.59
   1   3  -6 3325.69  145.35
   1  -3  -6 3495.07  161.30
  -1  -3   6 3418.97  161.83
   1  -3  -6 3455.76  158.55
   1  -3  -6 3512.86  151.29
   1   3  -5 1314.68   97.51
   1   3  -5 1353.01  104.83
  -1   3   5 1350.78  140.24
   1  -3  -5 1275.53  114.14
  -1  -3   5 1322.22  101.01
   1  -3  -5 1343.11  103.68
   1  -3  -5 1444.22  103.17
   1   3  -4 3036.13  165.06
   1   3  -4 3253.33  108.03
   1   3  -4 3280.09  106.99
  -1   3   4 3163.32  111.95
   1  -3  -4 2831.26   97.56
   1  -3  -4 3101.63  105.21
  -1  -3   4 3052.92   97.75
   1  -3  -4 3338.27  102.18
   1   3  -3 2062.18  133.40
  -1   3   3 1871.41  136.47
   1   3  -3 1907.56  110.70
   1  -3  -3 1724.72  101.79
   1  -3  -3 2160.24  128.61
   1  -3  -3 1990.16  112.52
  -1  -3   3 1896.45  110.51
  -1  -3   3 1842.97  107.08
  -1   3   2 9204.42  176.37
   1   3  -2 9250.50  163.86
   1   3  -2 9074.45  166.39
   1  -3  -2 9450.16  176.44
   1  -3  -2 9240.75  156.52
  -1  -3   2 9091.20  163.63
  -1  -3   2 9313.55  166.64
   1   3  -1 1664.36   94.48
   1   3  -1 1635.07   93.72
  -1   3   1 1750.86  103.67
   1  -3  -1 1566.22   91.92
  -1  -3   1 1534.91   88.87
  -1  -3   1 1626.22   94.03
   1   3   1  486.50   39.96
  -1   3  -1  426.43   43.62
   1   3   1  358.42   30.69
   1  -3   1  493.31   82.23
  -1  -3  -1  373.05   29.56
  -1  -3  -1  422.70   28.55
  -1   3  -238204.64  666.24
   1   3   233447.61  575.64
  -1   3  -234559.68  575.79
   1  -3   233804.43  596.66
  -1  -3  -237863.86  639.64
  -1  -3  -235926.93  608.03
   1   3   314002.19  261.55
  -1   3  -314708.10  252.29
   1  -3   314309.34  287.79
  -1  -3  -313908.97  249.72
  -1  -3  -315757.55  278.42
   1   3   4 6796.43  229.11
  -1   3  -4 6057.39  175.62
   1  -3   4 5502.18  198.65
  -1  -3  -4 5946.23  179.36
  -1  -3  -4 6729.50  200.97
  -1   3  -5 3304.20   99.69
   1   3   5 3644.89  157.81
  -1  -3  -5 3835.31  130.20
  -1  -3  -5 3349.95  117.97
   1  -3   5 2893.56  177.23
   1   3   6  427.88   92.49
  -1   3  -6  202.54   42.31
  -1   3  -6  350.42   58.62
  -1   3  -6  344.81   49.94
  -1  -3  -6  313.12   47.03
  -1  -3  -6  335.23   56.21
  -1  -3  -6  397.99   56.34
   1   3   7   74.41   49.88
  -1   3  -7   90.91   30.74
  -1   3  -7  115.21   38.93
  -1   3  -7  156.24   41.79
  -1  -3  -7  142.85   41.46
  -1  -3  -7   76.18   30.52
  -1  -3  -7  142.93   39.08
  -1   3  -8 2555.26  127.15
  -1   3  -8 2388.14  125.04
  -1  -3  -8 1986.81  112.69
  -1  -3  -8 2711.96  145.69
  -1   3  -9 1374.76  152.65
  -1   3  -9 1355.09  145.87
  -1   3  -9 1203.69  131.13
  -1  -3  -9 1263.98  136.18
  -1  -3  -9 1198.22  159.73
  -1   3 -10 1539.32   73.99
  -1   3 -10 1651.02   92.73
  -1  -3 -10 1441.30  123.19
  -1  -3 -10 1586.74  173.97
  -1   3 -11  183.05   80.30
  -1   3 -12   99.42   35.67
  -1  -3 -12   17.55   16.53
   1   5 -12   21.85   32.61
   1  -5 -12   29.18   22.22
   1   5 -11  382.46  160.53
   1  -5 -11  355.73  119.91
   1  -5 -11  630.31  130.77
   1   5 -10   78.58   34.73
   1  -5 -10   85.84   32.81
   1   5  -9 1042.96  135.03
   1  -5  -9 1137.10  152.52
   1  -5  -9  976.55  113.14
   1   5  -8 4086.82  195.91
   1   5  -8 3679.84  174.24
   1  -5  -8 4072.50  189.35
  -1  -5   8 4290.58  206.04
   1   5  -7 1145.32  103.12
   1   5  -7 1191.77   96.48
   1  -5  -7 1520.65  128.25
  -1  -5   7 1251.43  104.32
   1  -5  -7 1142.24  103.53
   1  -5  -7 1265.58  101.05
   1   5  -6  574.30  117.44
   1   5  -6  604.41  116.51
   1   5  -6  624.44   83.55
   1  -5  -6  552.13   73.00
   1  -5  -6  662.13  103.21
   1  -5  -6  445.08   58.54
  -1  -5   6  687.46   88.06
   1   5  -5  759.33  146.80
   1   5  -5  931.81   76.62
   1   5  -5  992.90  102.48
   1  -5  -5 1005.60   97.64
   1  -5  -5  814.41   61.07
  -1  -5   5  887.31   69.89
   1  -5  -5  805.81   70.07
  -1   5   4  227.82   38.39
   1   5  -4  245.51   33.06
   1   5  -4  249.00   28.36
   1  -5  -4  266.57   33.58
  -1  -5   4  214.15   25.71
   1  -5  -4  304.63   46.70
  -1   5   3  485.15   47.06
   1   5  -3  393.28   31.42
   1   5  -3  350.27   34.21
  -1   5   3  387.83   64.67
   1  -5  -3  356.10   26.57
   1  -5  -3  408.94   67.17
  -1  -5   3  373.15   33.24
  -1  -5   3  322.37   56.98
   1   5  -2  672.09   50.36
   1   5  -2  684.40   43.34
  -1   5   2  796.47  118.78
   1  -5  -2  801.32  107.96
  -1  -5   2  721.47   48.13
  -1  -5   2  613.34   46.48
  -1   5   1   54.44   29.81
   1   5  -1   65.81   19.86
  -1   5   1  103.65   14.19
   1   5  -1   86.47   15.53
   1  -5  -1   50.49   16.31
  -1  -5   1   97.74   17.95
  -1  -5   1  107.21   19.59
  -1   5   0  217.69   32.79
   1   5   0  158.37   22.69
   1   5   0  224.70   25.84
  -1   5   0  201.86   28.99
   1  -5   0  151.93   24.92
  -1  -5   0  190.20   26.57
  -1  -5   0  257.31   31.07
  -1   5  -1 4765.88  112.10
   1   5   1 5119.81   95.54
   1   5   1 4402.48   87.98
   1  -5   1 4475.85  118.47
  -1  -5  -1 4902.34   88.96
   1  -5   1 4519.12   80.91
  -1  -5  -1 4707.20   95.33
  -1   5  -211381.58  241.65
   1   5   211779.75  210.65
  -1   5  -211372.38  189.81
   1  -5   210034.54  216.54
  -1  -5  -210762.95  188.15
  -1  -5  -211083.98  203.11
   1   5   3 1491.79  120.22
  -1   5  -3 1470.20  116.03
  -1   5  -3 1287.44   73.23
   1  -5   3 1503.50  198.05
   1  -5   3 1271.13   74.95
  -1  -5  -3 1323.32   81.98
  -1  -5  -3 1319.19   91.58
  -1   5  -4  884.67   96.34
   1   5   4  579.90   77.52
  -1   5  -4  526.28   43.38
  -1  -5  -4  607.84   95.50
  -1  -5  -4  583.13   50.31
  -1  -5  -4  672.05   78.41
  -1   5  -5  925.63  162.47
   1   5   5 1262.60  161.19
  -1   5  -5  850.26   81.11
  -1   5  -5  828.05   81.56
  -1  -5  -5  975.25   77.58
  -1  -5  -5  837.46  101.64
  -1  -5  -5  899.01   80.72
   1   5   6 2070.92  217.82
  -1   5  -6 1115.17  256.39
  -1   5  -6 1694.63   77.30
  -1   5  -6 1605.56   84.86
  -1  -5  -6 1577.79   79.41
  -1  -5  -6 1804.28   94.37
   1   5   7  127.10   53.11
  -1   5  -7   44.32   33.98
  -1   5  -7   10.31   10.95
  -1  -5  -7  112.04   38.22
  -1  -5  -7   40.17   22.35
  -1  -5  -7   61.43   21.99
   1   5   8  108.00   78.54
  -1   5  -8  139.26   43.01
  -1   5  -8  181.73   56.71
  -1  -5  -8   73.73   37.80
  -1  -5  -8  221.40   67.60
  -1   5  -9  289.84   94.15
  -1   5  -9  183.66   40.75
  -1   5  -9  180.85   38.22
  -1  -5  -9  200.21   50.82
  -1  -5  -9  155.93   44.93
  -1   5 -10   55.77   40.95
  -1   5 -10   55.50   27.34
  -1  -5 -10   88.82   39.77
  -1  -5 -10   27.45   28.08
  -1   5 -11   15.82   37.43
  -1  -5 -11   23.87   19.30
  -1  -5 -11  -45.10   31.16
  -1   5 -12  865.15  221.97
  -1  -5 -12  309.90  157.25
   1   7 -12   85.94   52.80
   1  -7 -12  126.73   64.96
   1   7 -11 1000.03  194.62
   1  -7 -11 1051.07  206.44
   1   7 -10  165.24   50.21
   1  -7 -10   76.27   28.89
   1   7  -9 1481.28  147.17
   1   7  -9 1562.54  160.02
   1  -7  -9 1340.01  178.85
  -1  -7   9 1617.96  165.29
   1  -7  -9 1406.79  142.02
   1   7  -8   51.35   19.37
   1   7  -8   93.45   50.24
   1  -7  -8  119.82   35.31
  -1  -7   8  104.04   48.46
   1  -7  -8  177.15   54.17
   1   7  -7  854.68   71.53
   1   7  -7  913.90   98.42
   1  -7  -7  958.02  109.09
  -1  -7   7  770.43  140.15
   1  -7  -7  966.18   84.90
   1   7  -6  757.70  134.88
   1   7  -6  769.67   99.72
   1   7  -6  921.83  133.60
   1  -7  -6  942.96  109.64
   1  -7  -6  926.98  106.45
  -1  -7   6  975.80  117.85
   1  -7  -6  848.97  105.43
   1   7  -5   56.11   37.40
   1   7  -5  105.26   25.83
   1   7  -5   68.26   31.14
   1  -7  -5   72.50   37.03
  -1  -7   5   52.06   21.11
   1  -7  -5   42.02   17.87
  -1   7   4 1683.21  167.67
   1   7  -4 1273.47   98.81
   1   7  -4 1079.27   80.03
   1  -7  -4 1550.66  115.23
  -1  -7   4 1122.18   88.25
  -1  -7   4 1206.67   92.54
   1  -7  -4 1229.24  165.04
   1   7  -3 5349.26  102.22
  -1  -7   3 5235.66  114.79
   1  -7  -3 5569.08  120.41
  -1  -7   3 5330.50  104.80
   1  -7  -3 5881.21  101.46
  -1   7   2 1445.60   81.50
   1   7  -2 1474.07  109.20
   1   7  -2 1316.38   77.73
   1  -7  -2 1358.09   76.03
  -1  -7   2 1427.79   91.29
  -1  -7   2 1391.67   82.32
   1  -7  -2 1380.33   98.05
   1   7  -1 4853.26  100.07
  -1   7   1 4822.64   87.99
   1   7  -1 5210.76   97.47
  -1  -7   1 4790.16   96.95
   1  -7  -1 4795.57   99.94
   1  -7  -1 5306.45   95.97
  -1  -7   1 5017.85   96.20
   1   7   0 3752.45   74.77
   1   7   0 3896.09   81.55
  -1   7   0 3938.13   78.66
   1  -7   0 3786.43   74.04
  -1  -7   0 3961.08   82.16
  -1  -7   0 3879.70   83.34
  -1   7  -1 1062.90  130.16
  -1   7  -1  968.77   61.72
   1   7   1  867.14   53.59
   1   7   1  616.95   72.37
  -1  -7  -1  977.22   57.93
   1  -7   1  898.18   68.82
  -1  -7  -1  900.24   65.78
  -1   7  -2 3451.27  105.95
   1   7   2 3631.85   80.65
  -1   7  -2 3599.62   81.08
  -1   7  -2 3659.85   65.21
   1  -7   2 3809.26   68.19
  -1  -7  -2 3929.51   77.60
  -1  -7  -2 3671.35   83.93
  -1   7  -3 2094.73  142.87
   1   7   3 1780.85  106.84
  -1   7  -3 2075.82  125.26
  -1   7  -3 2194.12  121.71
  -1  -7  -3 2039.75  117.28
   1  -7   3 2152.20  120.58
  -1  -7  -3 2292.97  139.81
  -1   7  -4  458.32   88.40
   1   7   4  187.78   34.15
  -1   7  -4  294.03   38.47
  -1   7  -4  315.40   29.83
  -1  -7  -4  348.34   36.10
   1  -7   4  259.55   43.89
  -1  -7  -4  315.55   43.38
  -1   7  -5  933.38  121.67
   1   7   5  917.30  126.13
  -1   7  -5 1095.31  109.38
  -1   7  -5  924.02   80.67
  -1  -7  -5 1087.04   98.37
  -1  -7  -5  758.16  137.89
  -1  -7  -5 1036.56  119.69
  -1   7  -6   89.31   40.76
   1   7   6  148.26   60.92
  -1   7  -6   64.08   27.71
  -1   7  -6   80.40   22.36
  -1  -7  -6   40.33   25.43
  -1  -7  -6   23.84   27.08
  -1  -7  -6  113.41   42.09
   1   7   7   47.94   21.53
  -1   7  -7   78.20   28.29
  -1   7  -7   -4.84   25.97
  -1  -7  -7   23.16   20.47
  -1  -7  -7   84.99   38.15
   1   7   8   75.58   53.05
  -1   7  -8  200.19   58.19
  -1  -7  -8  183.95   40.51
  -1  -7  -8  285.93   65.46
  -1   7  -9 4195.26  284.94
  -1   7  -9 3837.52  253.19
  -1  -7  -9 4004.10  273.36
  -1   7 -10   57.53   22.83
  -1   7 -10  216.19   72.79
  -1  -7 -10  250.35   65.58
  -1  -7 -10   99.49   46.07
  -1   7 -11  410.00  139.12
  -1  -7 -11  299.04  113.46
  -1  -7 -11  282.23  119.70
  -1  -7 -12  415.56  124.07
   1  -9 -12 2420.72  402.51
   1  -9 -11  112.11   50.03
   1   9 -10 1174.99  180.71
   1  -9 -10 1076.28  152.14
   1  -9 -10 1335.81  197.87
   1   9  -9 2598.45  192.97
   1   9  -9 2150.55  203.17
   1  -9  -9 2228.07  213.41
  -1  -9   9 2215.39  246.16
   1   9  -8  167.68   37.24
   1   9  -8  144.93   66.16
   1  -9  -8  227.74   40.20
  -1  -9   8  163.34   51.37
   1  -9  -8  133.33   46.06
   1   9  -7  979.88  116.91
   1   9  -7 1211.50  169.33
   1  -9  -7 1018.67   79.65
  -1  -9   7 1015.06   91.74
   1  -9  -7 1282.41  144.79
   1   9  -6 6503.20  305.81
   1   9  -6 7552.88  311.65
   1   9  -6 7422.98  296.22
  -1  -9   6 7165.53  289.56
   1  -9  -6 6567.86  274.37
  -1   9   5  102.87   24.88
   1   9  -5  121.61   22.38
   1   9  -5  191.01   45.50
   1  -9  -5   57.53   48.29
  -1  -9   5  160.00   30.91
   1  -9  -5  213.54   27.01
  -1   9   4 5704.09  164.96
   1   9  -4 5224.41  183.18
   1   9  -4 5162.10  147.50
   1  -9  -4 5542.29  150.03
  -1  -9   4 4967.17  152.09
  -1  -9   4 4909.42  141.89
   1  -9  -4 5367.32  189.03
  -1   9   3 4258.42  123.07
   1   9  -3 4825.70  152.83
   1   9  -3 4572.73  134.93
   1  -9  -3 5092.34  143.19
  -1  -9   3 4493.31  140.38
  -1  -9   3 4941.84  149.13
   1  -9  -3 4555.81  157.73
  -1   9   2 1254.76   71.52
   1   9  -2 1237.98   74.13
  -1  -9   2 1198.10   76.72
   1  -9  -2 1267.85  145.56
  -1  -9   2 1242.11   75.15
   1  -9  -2 1185.74   68.06
  -1   9   1 3063.25   62.99
   1   9  -1 3120.24   75.95
   1   9  -1 3075.19   66.75
  -1  -9   1 2987.48   71.41
  -1  -9   1 3078.06   68.51
   1  -9  -1 3047.38   63.33
   1   9   027120.83  463.54
  -1   9   027136.20  462.44
   1   9   026686.00  456.23
  -1  -9   026709.94  456.25
   1  -9   027679.97  471.06
  -1  -9   025710.89  441.90
   1  -9   027220.27  464.18
   1   9   1  174.40   33.96
   1   9   1  175.79   27.18
  -1   9  -1  126.52   27.64
  -1  -9  -1  159.01   26.58
   1  -9   1  105.09   19.63
  -1  -9  -1  177.81   30.01
  -1   9  -2 1928.77  225.46
   1   9   2 1822.42  106.26
  -1   9  -2 1768.62  101.09
  -1   9  -2 1499.90   92.10
   1   9   2 1760.10  107.47
   1  -9   2 1847.60  103.86
  -1  -9  -2 1895.00  109.36
  -1  -9  -2 1607.19  124.38
  -1   9  -3 2159.00  242.62
   1   9   3 2631.27   90.26
  -1   9  -3 2734.36  148.42
  -1   9  -3 2539.36   73.71
  -1  -9  -3 2624.28   84.29
   1  -9   3 2429.12   72.32
  -1  -9  -3 2568.27   98.82
  -1   9  -4 1936.07  238.53
   1   9   4 2634.89  135.43
  -1   9  -4 2297.19   92.94
  -1   9  -4 2080.62   59.67
  -1  -9  -4 2214.32   70.98
   1  -9   4 2014.20   60.68
  -1  -9  -4 2201.11   83.04
  -1   9  -5  359.32  100.96
   1   9   5  350.68   50.39
  -1   9  -5  425.24   39.76
  -1   9  -5  685.18  123.02
  -1  -9  -5  312.21   49.13
   1  -9   5  317.54   65.31
  -1  -9  -5  344.64   36.54
  -1  -9  -5  515.51   80.20
   1   9   6 7374.85  388.43
  -1   9  -6 6563.06  276.86
  -1   9  -6 6721.66  265.17
  -1  -9  -6 6332.63  257.35
  -1  -9  -6 5756.29  243.79
  -1  -9  -6 6448.62  267.85
   1   9   7   48.46   27.17
  -1   9  -7   67.68   29.82
  -1   9  -7   16.36   14.11
  -1  -9  -7   56.71   23.70
   1   9   8  122.87   52.32
  -1   9  -8   26.54   16.71
  -1   9  -8  106.36   63.37
  -1  -9  -8  127.69   46.70
  -1  -9  -8  106.41   49.58
  -1   9  -9  998.18  121.37
  -1   9  -9  868.03   86.54
  -1  -9  -9  775.32  205.36
  -1   9 -10  134.44   52.91
  -1  -9 -10   15.30   35.12
  -1   9 -11  487.74  179.87
  -1  -9 -11  449.46  157.79
   1  11 -11 1863.89  316.17
   1 -11 -11 2067.33  376.71
   1  11 -10   48.99   41.18
   1 -11 -10   43.32   42.12
   1  11  -9   50.70   26.22
   1 -11  -9   29.14   19.62
  -1 -11   9   29.04   20.52
   1 -11  -9  100.09   42.05
   1  11  -8 3334.42  194.52
   1  11  -8 3307.10  212.34
   1 -11  -8 3004.91  174.54
  -1 -11   8 3216.63  194.20
   1 -11  -8 3930.50  243.65
   1  11  -7  980.14   79.16
   1  11  -7  883.11  115.82
   1 -11  -7  746.58   59.19
  -1 -11   7  834.09   75.86
   1 -11  -7 1172.34  107.54
   1  11  -6 2867.43  210.10
   1  11  -6 3200.78  135.17
   1 -11  -6 3619.14  146.90
  -1 -11   6 2779.32  197.69
  -1  11   5 6822.86  240.77
   1  11  -5 7365.23  240.54
   1  11  -5 6967.92  241.06
   1 -11  -5 6462.51  264.08
  -1 -11   5 7181.11  237.74
   1 -11  -5 7422.32  236.58
  -1  11   4    4.23   10.35
   1  11  -4   48.47   26.96
   1  11  -4   41.33   18.71
   1 -11  -4   29.33    9.46
  -1 -11   4  104.58   36.44
  -1 -11   4   15.01    8.79
   1 -11  -4   26.45   23.06
  -1  11   3 1306.38   95.31
   1  11  -3 1294.17  150.86
   1  11  -3 1261.25  114.46
   1 -11  -3 1178.97   84.37
  -1 -11   3 1139.02   88.79
  -1 -11   3 1132.71   85.93
   1 -11  -3 1124.75  151.14
  -1  11   2  237.74   27.02
   1  11  -2  167.48   33.21
   1  11  -2  225.38   36.43
   1 -11  -2  241.35   43.67
   1 -11  -2  259.09   52.08
  -1 -11   2  174.65   25.23
  -1 -11   2  268.65   49.94
  -1  11   1    6.01   14.94
   1  11  -1   89.18   28.54
   1  11  -1   50.20   20.46
   1 -11  -1    5.92   11.68
  -1 -11   1   -8.73   15.27
  -1 -11   1   75.96   18.80
   1 -11  -1   82.47   38.20
  -1  11   0 2447.18  141.72
   1  11   0 2636.88  198.84
   1  11   0 2476.46  143.21
  -1 -11   0 2326.35  137.32
  -1 -11   0 2214.36  133.38
   1 -11   0 2547.56  181.79
   1 -11   0 2491.50  145.00
   1  11   115465.92  270.42
   1  11   115090.28  271.23
  -1  11  -115739.66  281.85
   1 -11   115107.28  268.48
   1 -11   115005.51  263.73
  -1 -11  -115713.38  274.74
  -1  11  -2 2627.01  231.77
   1  11   2 3196.60   99.22
   1  11   2 2559.43   88.20
  -1  11  -2 2938.69  102.03
  -1  11  -2 3106.87   95.11
   1 -11   2 2912.94   87.48
  -1 -11  -2 2831.62   86.39
  -1 -11  -2 2776.08  101.38
  -1  11  -3 3663.37  230.86
   1  11   3 4027.63  130.29
  -1  11  -3 3284.90  113.53
  -1  11  -3 3397.67   99.07
  -1 -11  -3 3546.82  107.66
   1 -11   3 3249.34   97.40
  -1 -11  -3 3440.09  119.25
  -1  11  -4 4690.48  292.41
   1  11   4 4535.61  137.89
  -1  11  -4 5388.92  165.23
  -1  11  -4 5239.86  142.83
  -1 -11  -4 5381.16  160.63
   1 -11   4 5230.32  145.15
  -1 -11  -4 5196.66  166.95
  -1  11  -5  754.26  156.34
   1  11   5  659.37   86.79
  -1  11  -5  787.20   89.46
  -1  11  -5 1076.58  181.27
   1 -11   5  917.76  104.55
  -1 -11  -5  767.97  124.77
  -1 -11  -5  821.71   94.52
  -1 -11  -5 1002.85  124.23
   1  11   6 3429.69  159.57
  -1  11  -6 3580.95  143.01
  -1  11  -6 3673.06  235.13
  -1 -11  -6 3656.50  155.65
  -1 -11  -6 4149.82  256.58
   1  11   7 1388.73  127.90
  -1  11  -7 1332.12   99.17
  -1  11  -7 1353.29  118.06
  -1 -11  -7 1318.71  104.72
  -1 -11  -7 1309.60  115.40
   1  11   8   28.09   30.78
  -1  11  -8   34.40   15.98
  -1  11  -8   64.77   42.71
  -1 -11  -8   37.76   22.03
  -1 -11  -8   98.90   48.55
   1  11   9  121.32   58.39
  -1  11  -9  -10.32   36.48
  -1  11  -9   41.87   16.48
  -1 -11  -9   61.70   31.24
  -1  11 -10  110.62   46.27
  -1 -11 -10    7.55   19.47
  -1 -11 -10   30.44   31.01
  -1  11 -11 1632.43  269.71
  -1 -11 -11 1355.24  225.08
   1  13 -11 2460.80  442.42
   1 -13 -11 2968.20  474.84
   1  13 -10 1675.46  289.48
   1 -13 -10 1844.47  188.01
   1  13  -9  137.52   46.69
   1 -13  -9   75.92   25.22
  -1 -13   9   71.13   41.08
   1 -13  -9  147.52   50.62
   1  13  -8  122.87   47.10
   1  13  -8   60.87   22.65
   1 -13  -8   85.36   25.27
   1 -13  -8   93.44   26.13
   1 -13  -8   83.19   39.30
   1  13  -7 1759.46  109.25
   1  13  -7 1776.20  244.74
   1 -13  -7 1441.65  180.39
  -1 -13   7 1618.92  211.28
   1 -13  -7 1721.10  468.04
  -1  13   6 2599.04  238.37
   1  13  -6 2767.63  572.36
   1  13  -6 2898.38  153.90
   1 -13  -6 3053.62  156.80
  -1 -13   6 2807.30  155.58
   1  13  -5 7036.73  303.02
   1  13  -5 6940.52  285.22
   1 -13  -5 7906.59  320.94
  -1 -13   5 6901.62  287.28
  -1  13   4 3458.49  115.94
   1  13  -4 3658.07  137.85
   1  13  -4 3902.52  151.24
   1 -13  -4 4100.94  132.99
  -1 -13   4 3690.57  135.02
  -1 -13   4 4093.73  142.23
   1 -13  -4 3863.75  174.53
  -1  13   3  328.68   52.45
   1  13  -3  158.76   30.33
   1  13  -3  256.49   28.51
   1 -13  -3  301.54   46.32
   1 -13  -3  301.05   54.32
  -1 -13   3  350.68   46.88
  -1 -13   3  186.46   31.55
  -1  13   2 2343.09   73.33
   1  13  -2 2519.29   93.43
   1  13  -2 2468.13   96.46
  -1 -13   2 2428.98   86.36
   1 -13  -2 2062.66  154.18
  -1 -13   2 2630.85   87.76
   1 -13  -2 2454.62   77.85
   1 -13  -2 2621.33   97.95
   1  13  -1 4796.41  150.82
  -1  13   1 4618.60  138.24
   1  13  -1 4901.73  148.87
   1 -13  -1 4683.93  139.94
  -1 -13   1 4611.00  143.38
  -1 -13   1 4670.26  145.44
   1 -13  -1 4998.57  156.46
  -1  13   0 2991.01   98.46
   1  13   0 2515.43   85.80
   1  13   0 2793.80   93.97
   1 -13   0 2907.91   95.03
  -1 -13   0 2792.05  107.77
   1 -13   0 2699.17   92.02
  -1 -13   0 2881.20  121.59
   1  13   1 3269.69  103.28
  -1  13  -1 3373.68  113.46
   1  13   1 3488.66  115.45
  -1 -13  -1 3664.16  114.07
   1 -13   1 3261.55  105.40
  -1 -13  -1 3309.62  112.09
   1 -13   1 3567.18  111.51
  -1  13  -2  948.56  150.64
   1  13   2 1130.11   83.87
  -1  13  -2 1004.22   75.12
  -1  13  -2 1060.23   91.75
   1 -13   2 1029.07   77.33
  -1 -13  -2 1155.54  122.15
  -1 -13  -2  988.36   74.45
  -1  13  -3  577.03   92.01
   1  13   3  781.12   60.68
  -1  13  -3  749.09   72.67
  -1  13  -3  920.15  119.15
   1 -13   3  795.23   58.81
  -1 -13  -3  638.97   70.89
  -1 -13  -3  763.22   62.55
  -1  13  -4  955.12  145.07
   1  13   4 1308.34  151.08
  -1  13  -4 1276.01  150.27
  -1  13  -4 1201.21  107.50
  -1 -13  -4 1190.18  106.78
   1 -13   4 1179.70  102.27
  -1 -13  -4 1259.69  192.15
   1  13   5   75.23   31.04
  -1  13  -5  189.35   50.64
  -1  13  -5   79.28   16.88
  -1 -13  -5   80.52   20.66
   1 -13   5   87.27   16.47
  -1 -13  -5  160.43   39.90
   1  13   6 2187.54  174.66
  -1  13  -6 2459.00  196.07
  -1  13  -6 2202.04  160.69
  -1 -13  -6 2332.04  175.23
   1 -13   6 2055.80  151.50
  -1 -13  -6 2255.84  179.49
   1  13   7 2566.12  224.64
  -1  13  -7 2573.77  115.91
  -1  13  -7 2499.23  251.15
  -1 -13  -7 2698.78  128.93
  -1 -13  -7 2546.47  143.74
   1  13   8  324.35  104.18
  -1  13  -8  123.96   41.38
  -1  13  -8  274.78   86.48
  -1 -13  -8  359.82   97.18
  -1 -13  -8  221.45   79.46
   1  13   9  860.71  158.10
  -1  13  -9  729.45   85.50
  -1 -13  -9  864.07  133.41
  -1  13 -10 1067.10  183.08
  -1 -13 -10  922.26  184.07
  -1 -13 -11  267.05  102.15
   1  15 -11   81.99   45.87
   1 -15 -11    7.85   20.12
   1  15 -10   74.33   33.34
   1 -15 -10   97.15   55.38
   1  15  -9  125.68   36.83
  -1 -15   9   53.68   25.19
   1 -15  -9  123.51   57.71
   1  15  -8 1613.94  170.37
   1 -15  -8 1260.51  118.75
   1 -15  -8 1646.66  152.04
  -1 -15   8 1595.81  156.25
   1 -15  -8 1764.55  211.51
   1  15  -7  306.26   70.35
   1  15  -7  120.55   41.01
   1 -15  -7  249.11   48.73
  -1 -15   7  287.26   51.60
   1 -15  -7  308.18   71.93
  -1  15   6  147.81   37.75
   1  15  -6  186.81   68.69
   1  15  -6   86.30   27.57
   1 -15  -6   90.21   25.11
  -1 -15   6   63.34   24.42
   1 -15  -6   99.49   38.18
  -1  15   5  969.24   97.45
   1  15  -5 1417.22  144.06
   1  15  -5 1082.82   99.20
  -1 -15   5 1147.46   88.25
   1 -15  -5 1368.89   96.29
   1 -15  -5 1478.18  196.60
  -1  15   4    5.23    8.86
   1  15  -4   73.66   26.91
   1  15  -4   25.83   12.38
   1 -15  -4   76.49   17.91
  -1 -15   4   51.90   32.80
  -1 -15   4   -8.67   11.84
   1 -15  -4   12.65   17.93
   1 -15  -4  120.19   39.56
  -1  15   3   68.87   12.68
   1  15  -3   58.17   30.89
   1  15  -3   33.40   17.17
  -1 -15   3   41.44   23.81
   1 -15  -3   31.41   21.80
  -1 -15   3  108.25   23.40
   1 -15  -3   36.16   18.39
   1 -15  -3   52.92   30.72
  -1  15   2 5839.16  162.97
   1  15  -2 5945.95  181.24
   1  15  -2 6185.12  177.43
  -1 -15   2 5914.52  176.22
  -1 -15   2 5257.56  154.90
   1 -15  -2 6055.18  170.34
   1 -15  -2 6073.86  185.83
  -1  15   1  514.84   47.23
   1  15  -1  566.45   76.33
   1  15  -1  320.72   49.48
   1 -15  -1  280.53   58.98
  -1 -15   1  603.78   74.49
  -1 -15   1  412.46   44.45
   1 -15  -1  394.85   47.91
  -1  15   0 5095.69  157.45
   1  15   0 5087.05  157.77
   1  15   0 5032.01  155.69
   1 -15   0 4997.42  152.56
   1 -15   0 5105.53  165.82
  -1 -15   0 4748.42  153.80
  -1 -15   0 4860.23  150.16
   1  15   1  901.06   98.84
  -1  15  -1  792.48   70.62
   1  15   1  873.85   71.69
  -1 -15  -1  996.41  107.45
   1 -15   1  882.72   75.70
  -1 -15  -1  880.52   77.16
   1 -15   1 1122.80  108.36
   1  15   2 6310.28  180.96
  -1  15  -2 6414.81  180.24
  -1  15  -2 6091.15  183.72
   1 -15   2 5723.75  162.43
  -1 -15  -2 5964.83  186.36
  -1 -15  -2 6695.47  189.42
  -1  15  -3  201.57   47.61
   1  15   3  137.52   31.93
  -1  15  -3   58.51   17.40
  -1  15  -3  167.60   26.88
   1 -15   3   65.17   19.68
  -1 -15  -3   89.27   37.13
  -1 -15  -3  132.42   28.98
  -1  15  -4   91.95   34.24
   1  15   4  105.88   23.31
  -1  15  -4  104.58   21.30
  -1  15  -4   75.95   36.37
   1 -15   4  122.54   19.41
  -1 -15  -4  146.68   49.97
  -1 -15  -4  143.98   23.98
   1  15   5   32.66   16.13
  -1  15  -5  197.51   46.62
  -1  15  -5   68.01   13.26
  -1 -15  -5  155.84   27.90
   1 -15   5  128.91   29.58
  -1 -15  -5  176.46   54.21
   1  15   6 4248.39  213.07
  -1  15  -6 4127.57  166.99
  -1  15  -6 4014.31  138.33
  -1 -15  -6 3990.79  142.65
   1 -15   6 3682.62  128.84
  -1 -15  -6 3897.28  194.90
   1  15   7   51.81   32.91
  -1  15  -7   49.89   16.91
  -1  15  -7  208.40   68.75
  -1 -15  -7   72.99   26.42
  -1 -15  -7   90.69   49.11
   1  15   8 1064.22  225.18
  -1  15  -8 1315.85  142.62
  -1 -15  -8 1388.96  141.17
  -1 -15  -8 1357.84  234.41
   1  15   9   65.57   24.41
  -1  15  -9   16.72   40.67
  -1 -15  -9   49.81   31.31
  -1  15 -10  222.03   84.16
  -1 -15 -10  150.79   60.28
  -1  15 -11  211.63  112.65
  -1 -15 -11  335.18   87.37
   1  17 -11   96.43   74.71
   1 -17 -11  150.37   66.37
   1  17 -10  474.04  177.03
   1 -17 -10  396.94  159.36
   1  17  -9  825.52  224.24
   1 -17  -9 1233.95  203.26
   1  17  -8   92.34   53.59
  -1 -17   8   32.54   28.17
   1 -17  -8   58.02   24.66
   1  17  -7 1080.73  136.82
   1  17  -7  728.75  127.55
   1 -17  -7  981.27  108.48
  -1 -17   7  854.91  140.03
   1 -17  -7 1241.43  156.24
   1  17  -6 1495.97  191.51
   1  17  -6 1322.40  101.04
  -1 -17   6 1571.38  124.71
   1 -17  -6 1380.09  104.71
   1 -17  -6 1513.92  176.32
  -1  17   5  169.05   44.08
   1  17  -5  251.90   77.76
   1  17  -5  169.56   43.78
  -1 -17   5  321.92   77.96
   1 -17  -5  108.11   36.77
   1 -17  -5  410.27   96.95
  -1  17   4 1858.43  132.26
   1  17  -4 1313.63  109.70
   1  17  -4 1595.79  126.59
  -1 -17   4 1651.63  120.31
   1 -17  -4 1739.55  122.70
   1 -17  -4 1821.23  216.05
  -1  17   3 6709.92  274.91
   1  17  -3 5947.57  257.48
   1  17  -3 6288.65  261.00
  -1 -17   3 6140.54  262.66
  -1 -17   3 6926.08  289.63
   1 -17  -3 6689.66  274.96
   1 -17  -3 6489.77  293.43
  -1  17   2   36.47   16.90
   1  17  -2  102.26   30.49
   1  17  -2   55.99   19.46
  -1 -17   2   15.59   22.24
  -1 -17   2   65.21   32.65
   1 -17  -2   -1.94   12.68
   1 -17  -2   -0.77   22.99
  -1  17   1 1464.45  106.43
   1  17  -1 1693.72  179.33
   1  17  -1 1464.47  108.65
  -1 -17   1 1529.53  113.98
  -1 -17   1 1493.55  120.73
   1 -17  -1 1545.08  112.98
   1 -17  -1 1583.72  141.83
  -1  17   0 1159.37   93.66
   1  17   0 1185.97   94.82
   1  17   0 1008.05   79.22
  -1 -17   0 1077.63   83.76
  -1 -17   0 1405.51  161.33
   1 -17   0 1179.56  129.87
   1 -17   0  980.08  109.06
   1  17   1  258.19   31.47
  -1  17  -1  322.26   49.68
   1  17   1  221.68   34.57
  -1 -17  -1  259.31   47.61
   1 -17   1  256.35   60.99
   1 -17   1  231.95   33.11
  -1 -17  -1  268.56   51.73
   1  17   2  926.24  135.58
  -1  17  -2  742.83   76.84
  -1 -17  -2  727.76   93.42
   1 -17   2  763.10   86.01
  -1 -17  -2  673.25   74.61
  -1  17  -3 4890.01  329.56
   1  17   3 6692.17  277.57
  -1  17  -3 7029.06  288.49
  -1  17  -3 6511.77  278.58
   1 -17   3 6568.60  270.83
  -1 -17  -3 6786.68  307.55
  -1 -17  -3 6992.04  288.40
   1  17   4  317.67   48.53
  -1  17  -4  265.74   48.84
  -1  17  -4  361.48   83.97
   1 -17   4  273.10   38.59
  -1 -17  -4  377.53   71.40
  -1 -17  -4  267.91   65.21
   1  17   5   20.74   20.70
  -1  17  -5    4.66    7.89
  -1  17  -5  126.83   44.08
   1 -17   5   40.36   15.41
  -1 -17  -5   31.08   29.26
  -1 -17  -5    9.90    7.22
   1  17   6  758.69  108.57
  -1  17  -6  446.78   66.75
  -1  17  -6  765.37  154.03
   1 -17   6  785.97   96.54
  -1 -17  -6  829.36  146.98
  -1 -17  -6  633.47  112.17
   1  17   7  157.96   58.27
  -1  17  -7  133.71   61.84
  -1  17  -7   34.48   11.28
  -1 -17  -7  157.70   67.37
  -1  17  -8   39.11   39.67
  -1 -17  -8  144.27   66.19
  -1  17  -9 2049.42  263.94
  -1 -17  -9 1932.03  141.08
  -1  17 -10  102.84   47.63
  -1 -17 -10  163.99   59.30
  -1 -17 -11   93.55   54.95
   1  19 -10  327.72  102.95
   1 -19 -10  422.94  116.11
   1  19  -9 1874.32  170.48
   1 -19  -9 1957.45  174.73
   1  19  -8 5092.32  319.89
   1 -19  -8 4804.78  302.17
   1  19  -7  981.86  150.45
   1  19  -7  327.61  110.33
  -1 -19   7  455.37  161.25
   1 -19  -7  855.04  158.58
  -1  19   6   86.86   32.91
   1  19  -6  238.41   53.17
   1  19  -6  158.74   54.13
  -1 -19   6  219.17   59.55
   1 -19  -6  134.87   44.94
   1 -19  -6  385.57   80.98
  -1  19   5   96.55   28.53
   1  19  -5    4.63   37.15
   1  19  -5   76.24   31.06
  -1 -19   5   89.37   34.77
   1 -19  -5   36.65   12.89
   1 -19  -5   53.35   32.36
  -1  19   4 2196.52  162.33
   1  19  -4 2460.80  192.00
   1  19  -4 2254.45  181.18
  -1 -19   4 2435.22  183.14
   1 -19  -4 2538.12  187.57
   1 -19  -4 2627.85  214.78
  -1  19   3 4732.81  194.64
   1  19  -3 4944.68  212.80
   1  19  -3 4702.36  192.55
  -1 -19   3 5427.21  227.88
   1 -19  -3 5094.95  205.80
   1 -19  -3 5232.71  234.33
  -1  19   2 4606.02  203.52
   1  19  -2 5386.63  234.67
   1  19  -2 4946.88  237.28
  -1 -19   2 5019.50  217.63
  -1 -19   2 4981.34  213.50
   1 -19  -2 5412.65  226.51
   1 -19  -2 5461.34  262.52
  -1  19   1 3170.68  116.65
   1  19  -1 3113.48  121.15
   1  19  -1 2755.46  127.24
   1 -19  -1 2873.21  147.84
  -1 -19   1 2885.87  139.84
   1 -19  -1 2540.57  142.99
  -1 -19   1 2768.61  107.10
  -1  19   0 1675.11   95.70
   1  19   0 1737.18   78.95
   1  19   0 1634.86   72.77
   1 -19   0 1469.04   64.84
   1 -19   0 1476.45   67.90
  -1 -19   0 1963.80  192.97
  -1 -19   0 1583.44   70.07
   1  19   1   54.85   25.37
  -1  19  -1   21.26   27.68
   1  19   1    4.71   18.16
   1 -19   1   11.31   20.00
   1 -19   1   33.01   25.85
  -1 -19  -1    7.66   24.03
  -1 -19  -1   40.32   22.34
   1  19   2 4842.48  206.55
  -1  19  -2 5157.38  225.11
  -1 -19  -2 5552.11  234.30
   1 -19   2 5100.54  218.11
  -1 -19  -2 5592.09  254.00
   1  19   3 2132.86  152.46
  -1  19  -3 2277.78  177.55
  -1 -19  -3 2457.38  210.91
   1 -19   3 2004.76  150.70
  -1 -19  -3 2341.80  215.55
   1  19   4 3624.85  192.91
  -1  19  -4 4196.46  230.01
  -1  19  -4 4437.14  229.31
  -1 -19  -4 4369.20  228.12
   1 -19   4 3979.07  208.93
   1  19   5 2196.46  167.60
  -1  19  -5 2351.63  171.29
  -1  19  -5 2283.51  255.35
   1 -19   5 2039.82  154.09
  -1 -19  -5 2275.20  178.28
  -1 -19  -5 2380.75  175.52
  -1  19  -6   35.99   42.45
  -1 -19  -6   44.47   20.60
   1 -19   6   49.78   19.59
  -1 -19  -6  221.47   73.89
   1  19   7    7.60   10.63
  -1  19  -7  -11.55   40.04
  -1 -19  -7    8.38    8.01
  -1 -19  -7   66.61   33.88
   1  19   8 2846.67  197.44
  -1  19  -8 2762.66  260.96
  -1 -19  -8 2881.75  192.78
  -1  19  -9  709.04  232.85
  -1 -19  -9 1092.63  194.29
  -1  19 -10  889.84  299.40
  -1 -19 -10 1293.88  220.12
   1  21 -10  123.67   51.18
   1 -21 -10    2.49   40.20
   1  21  -9 1946.40  173.33
   1 -21  -9 1678.30  170.72
   1  21  -8 1569.57  105.09
   1 -21  -8 1454.09  130.16
   1  21  -7  569.18  103.60
  -1 -21   7  108.44   53.88
   1 -21  -7  527.17  107.00
  -1  21   6   50.88   19.02
   1  21  -6   71.15   52.98
   1 -21  -6   91.30   24.22
  -1 -21   6  177.17   55.50
   1 -21  -6  128.10   49.07
  -1  21   5 1856.61  112.91
   1  21  -5 1928.75  182.72
   1  21  -5 2005.16   99.05
  -1 -21   5 2509.33  128.13
   1 -21  -5 2203.42  102.62
   1 -21  -5 2291.63  131.26
  -1  21   4   73.08   24.33
   1  21  -4   86.19   34.66
   1 -21  -4   29.90   16.62
  -1 -21   4   76.41   36.11
   1 -21  -4   68.59   34.42
  -1  21   3 3392.36  178.41
   1  21  -3 4183.81  229.44
   1  21  -3 3742.74  198.40
  -1 -21   3 4450.15  238.35
   1 -21  -3 4087.46  214.71
   1 -21  -3 4093.57  224.57
  -1  21   2 1536.07  119.74
   1  21  -2 1754.40  219.40
   1  21  -2 1369.29  123.53
   1 -21  -2 1688.57  122.98
   1 -21  -2 1560.83  160.98
  -1 -21   2 1587.48  150.18
  -1  21   1  248.73   52.37
   1  21  -1  165.40   39.24
   1  21  -1  164.55   36.49
  -1 -21   1  145.66   32.42
  -1 -21   1  236.22   53.26
   1 -21  -1  314.82   59.73
   1 -21  -1  111.86   26.23
   1  21   0 1740.90  130.24
  -1  21   0 2082.14  169.93
   1 -21   0 1826.05  134.50
  -1 -21   0 1856.50  137.52
  -1 -21   0 2389.64  234.07
   1 -21   0 2117.87  226.73
   1  21   1  948.56   85.62
  -1  21  -1 1024.47  121.67
  -1 -21  -1  873.47   72.65
   1 -21   1 1044.25  113.49
  -1 -21  -1 1052.66  136.43
   1  21   2  115.26   26.53
  -1  21  -2  168.11   39.10
  -1 -21  -2   99.11   24.22
   1 -21   2   75.07   25.76
  -1 -21  -2   70.82   37.23
   1  21   3 3903.30  208.24
  -1  21  -3 4329.72  236.69
  -1 -21  -3 4251.78  224.78
   1 -21   3 3850.86  212.51
  -1 -21  -3 4314.33  238.24
   1  21   4  164.88   43.16
  -1  21  -4   63.98   26.07
   1 -21   4  202.26   50.98
  -1 -21  -4  204.41   66.71
   1  21   5   78.47   29.87
  -1  21  -5  230.20   76.88
  -1 -21  -5  140.98   42.94
   1 -21   5  138.44   46.15
  -1 -21  -5  407.47   78.75
   1  21   6 2697.78  177.45
  -1  21  -6 2256.80  288.64
  -1 -21  -6 2383.46  243.26
   1 -21   6 2191.62  221.65
  -1 -21  -6 2376.64  255.95
   1  21   7   41.74   28.75
  -1  21  -7  129.61   66.72
  -1 -21  -7  -27.22   29.66
  -1  21  -8   86.33   48.07
  -1 -21  -8   62.30   51.24
  -1  21  -9 1509.40  212.57
  -1 -21  -9 1686.67  152.17
  -1  21 -10   45.03   48.89
  -1 -21 -10   16.14   28.81
   1  23 -10  133.66   76.26
   1 -23 -10  131.00   71.96
   1  23  -9  833.48  280.91
   1 -23  -9 1081.09  292.19
   1  23  -8  446.83  130.46
   1 -23  -8  339.85   78.93
   1  23  -7  137.74   46.98
  -1 -23   7   16.97   22.78
   1 -23  -7   39.19   46.49
  -1  23   6  875.36  103.18
   1  23  -6 2059.75  264.87
   1  23  -6 1311.29  163.48
  -1 -23   6 1680.69  168.85
   1 -23  -6 1205.63  204.49
  -1  23   5 2045.55  230.39
   1  23  -5 2755.42  278.30
   1  23  -5 1971.70  220.80
  -1 -23   5 2392.75  278.41
   1 -23  -5 2182.91  241.48
   1 -23  -5 2041.96  271.05
  -1  23   4   74.03   30.18
   1  23  -4  132.07   46.02
   1  23  -4   89.13   35.60
  -1 -23   4  137.38   50.41
   1 -23  -4   12.94   11.47
   1 -23  -4  115.41   50.00
  -1  23   3 4047.24  145.97
   1  23  -3 4145.80  190.71
   1  23  -3 4030.44  151.11
   1 -23  -3 4666.39  169.90
   1 -23  -3 4073.80  163.28
  -1 -23   3 4693.41  180.54
  -1  23   2  195.42   47.68
   1  23  -2  307.25   78.88
   1  23  -2  173.83   46.41
   1 -23  -2  159.14   47.25
   1 -23  -2  313.42   77.91
  -1 -23   2  357.37   86.32
  -1  23   1  920.10  132.15
   1  23  -1  867.27  107.36
   1  23  -1  522.39   73.29
   1 -23  -1  351.48  115.75
   1 -23  -1  821.42   79.40
  -1 -23   1  765.00   73.85
   1  23   0  633.21   86.41
  -1  23   0  664.09   62.81
  -1 -23   0  416.05  109.85
   1 -23   0  502.44   51.30
   1 -23   0  779.20   75.47
  -1 -23   0  558.04   63.07
   1  23   1 3175.51  173.61
  -1  23  -1 3443.25  206.70
  -1 -23  -1 3107.49  171.49
  -1 -23  -1 3171.88  180.05
   1 -23   1 3595.59  233.36
   1  23   2   88.00   37.07
  -1  23  -2   23.88   33.19
  -1 -23  -2    2.81   10.72
   1 -23   2   26.65   21.77
  -1 -23  -2  -16.14   24.73
   1  23   3 3781.12  144.71
  -1  23  -3 3678.75  173.00
  -1 -23  -3 3629.55  192.68
   1 -23   3 3374.42  129.73
  -1 -23  -3 3965.21  250.48
   1  23   4   98.36   30.31
  -1  23  -4  267.87   51.31
  -1 -23  -4  115.37   34.36
   1 -23   4  202.04   53.39
  -1 -23  -4  154.37   66.02
   1  23   5   65.17   33.93
  -1  23  -5   65.11   47.25
  -1 -23  -5  -10.14   17.15
   1 -23   5   67.57   25.68
  -1 -23  -5  231.81   75.29
   1  23   6  626.24  107.72
  -1  23  -6  831.31  197.09
   1 -23   6  752.23  117.44
  -1 -23  -6  803.21  197.20
   1  23   7  332.62  122.84
  -1  23  -7  723.12  101.26
  -1 -23  -7 1026.98  148.70
  -1  23  -8  145.99   62.82
  -1 -23  -8   83.62   39.34
  -1  23  -9  701.72  179.18
  -1 -23  -9  518.46  148.57
  -1  23 -10  211.72   85.03
  -1 -23 -10  150.70   57.95
   1  25  -9  143.18   52.24
   1 -25  -9  169.09   64.98
   1  25  -8   61.42   40.40
   1 -25  -8  153.68   83.69
   1  25  -7  255.12   59.92
   1 -25  -7  322.37   71.99
   1  25  -6 5653.94  364.52
  -1 -25   6 5413.27  327.55
   1 -25  -6 5207.60  335.96
  -1  25   5   36.15   19.13
   1  25  -5   94.28   41.24
   1  25  -5   -8.33   13.60
   1 -25  -5   12.29   12.10
   1 -25  -5  106.40   60.02
  -1 -25   5   46.43   29.61
  -1  25   4  948.18  130.49
   1  25  -4 1531.33  213.24
   1  25  -4  679.83  150.20
   1 -25  -4 1078.96  123.93
   1 -25  -4 1063.92  180.27
  -1 -25   4 1211.72  145.90
  -1  25   3   30.05   16.25
   1  25  -3   36.41   39.59
   1  25  -3  125.69   44.88
   1 -25  -3   15.33   16.14
   1 -25  -3  193.15   74.38
  -1 -25   3   30.05   24.11
  -1  25   2  162.31   47.10
   1  25  -2  184.07   76.35
   1  25  -2  134.08   43.18
   1 -25  -2  103.60   40.96
   1 -25  -2  275.12   61.39
  -1 -25   2  121.46   43.95
  -1  25   1  975.72  108.40
   1  25  -1  975.12  116.44
   1 -25  -1  545.45   51.61
  -1 -25   1  796.16  100.31
   1 -25  -1  771.08   94.34
   1  25   0 6078.27  223.78
  -1  25   0 6381.76  233.93
  -1 -25   0 6187.92  295.55
   1 -25   0 6724.01  250.18
   1  25   1 1016.20  122.31
  -1  25  -1  870.87   80.90
   1 -25   1 1037.93  125.13
  -1 -25  -1  913.17  109.34
   1  25   2 1634.69  203.17
  -1  25  -2 1586.79  222.33
  -1 -25  -2 1422.41  188.99
   1 -25   2 1666.30  479.44
  -1 -25  -2 1388.43  180.75
   1  25   3  -29.10   19.25
  -1  25  -3  147.86   68.17
  -1 -25  -3   25.26   18.73
   1 -25   3   48.19   25.67
  -1 -25  -3   66.50   47.55
   1  25   4   27.02   15.69
  -1  25  -4   68.42   45.03
  -1 -25  -4    6.61   13.72
   1 -25   4   -2.28   15.23
  -1 -25  -4  128.06   55.88
   1  25   5  221.33   66.21
  -1  25  -5  199.66   62.21
  -1 -25  -5   76.19   30.46
   1 -25   5  227.79   47.48
  -1 -25  -5  237.16   73.14
   1  25   6 2873.14  184.49
  -1  25  -6 3112.17  294.60
  -1 -25  -6 3396.25  227.19
  -1  25  -7  334.15   84.08
  -1 -25  -7  372.18   85.88
  -1 -25  -8  143.01   63.82
  -1  25  -9   92.37   52.80
  -1 -25  -9  138.60   79.59
   1  27  -9  154.19   71.71
   1 -27  -9   45.75   40.92
   1  27  -8  208.44   76.84
   1 -27  -8   71.71   50.64
   1  27  -7   61.76   52.03
   1 -27  -7  148.57   83.54
   1  27  -6  -39.47   49.07
  -1 -27   6   65.31   30.55
   1 -27  -6  424.91  102.45
  -1  27   5 2534.36  177.43
   1  27  -5 3191.74  213.94
  -1 -27   5 2707.95  175.41
   1 -27  -5 3022.34  202.37
  -1  27   4    5.40   13.31
   1  27  -4   47.72   27.26
  -1 -27   4    9.53   20.00
   1 -27  -4  117.33   54.06
  -1  27   3   10.72   13.60
   1  27  -3   74.96   33.46
   1 -27  -3   16.31   21.15
  -1 -27   3   67.55   32.70
   1 -27  -3   24.92   30.24
  -1  27   2 1144.26  163.56
   1  27  -2 1382.63  204.84
   1 -27  -2  968.55  116.22
  -1 -27   2 1456.31  237.36
   1 -27  -2 1313.21  159.11
  -1  27   1 2693.11  584.09
   1  27  -1 2865.82  179.41
  -1 -27   1 2786.90  289.98
   1 -27  -1 2845.20  178.08
   1  27   0  127.57   41.36
  -1  27   0  114.89   44.44
  -1 -27   0   90.76   42.14
   1 -27   0  142.11   57.36
   1  27   1 3577.29  214.32
  -1  27  -1 3587.62  217.09
   1 -27   1 3871.77  297.97
  -1 -27  -1 3747.79  268.02
   1  27   2  274.35   54.16
  -1  27  -2  200.19   48.49
   1 -27   2  226.58   50.55
  -1 -27  -2  571.31   99.83
   1  27   3  718.00  159.98
  -1  27  -3 1057.20  204.93
   1 -27   3 1021.43  114.14
  -1 -27  -3 1125.29  197.18
   1  27   4   47.47   16.43
  -1  27  -4   36.30   44.54
   1 -27   4   84.20   42.29
  -1 -27  -4   58.87   35.39
   1  27   5 1058.15  223.21
  -1  27  -5 1813.20  135.06
   1 -27   5 1508.67  151.27
  -1 -27  -5 1628.76  258.69
  -1  27  -6  216.68  100.39
  -1 -27  -6  217.75   55.56
  -1  27  -7  943.77  182.51
  -1 -27  -7  915.23  251.27
  -1  27  -8  187.34   83.80
  -1 -27  -8  111.44   63.10
  -1  27  -9  146.60   57.10
  -1 -27  -9  278.32   91.55
   1  29  -8 1130.91  275.45
   1 -29  -8 1068.39  244.40
   1  29  -7  291.06  108.17
   1 -29  -7  337.59  128.49
   1  29  -6  913.12  200.74
   1 -29  -6  688.58  160.09
   1  29  -5 1060.97  156.10
  -1 -29   5  925.53   58.84
   1 -29  -5 1083.55  164.26
  -1  29   4   32.42   14.12
   1  29  -4   63.60   46.84
  -1 -29   4   86.26   40.23
   1 -29  -4   60.70   38.60
  -1  29   3   92.12   32.77
   1  29  -3  140.53   66.26
  -1 -29   3   78.76   43.07
   1 -29  -3  106.12   54.52
  -1  29   2 1812.05  199.74
   1  29  -2 2218.19  282.11
  -1 -29   2 2028.03  278.08
   1 -29  -2 1979.84  274.61
   1  29  -1  104.00   57.90
  -1  29   1   47.24   18.97
  -1 -29   1   49.11   36.43
   1 -29  -1   19.72   26.97
   1  29   0 3350.35  206.37
  -1  29   0 3346.46  206.45
  -1 -29   0 2960.92  269.14
   1 -29   0 3177.55  243.11
   1  29   1 1752.34  240.69
  -1  29  -1 2214.41  276.70
   1 -29   1 2110.25  279.01
  -1 -29  -1 2024.13  284.19
   1  29   2   44.91   22.10
  -1  29  -2   51.63   40.37
   1 -29   2   -3.96   22.42
  -1 -29  -2  104.37   64.49
   1  29   3  159.48   72.79
  -1  29  -3  239.49   73.29
   1 -29   3  353.07   67.36
  -1 -29  -3  277.65   66.40
   1  29   4  805.92  138.93
  -1  29  -4 1285.99  279.59
   1 -29   4  963.38  153.51
  -1 -29  -4 1376.78  219.09
   1  29   5   35.14   20.90
  -1  29  -5  107.96   33.98
  -1 -29  -5  125.74   83.24
  -1  29  -6 1494.13  147.29
  -1 -29  -6 1422.95  142.36
  -1  29  -7  367.61  102.28
  -1 -29  -7  378.22  135.10
  -1  29  -8  197.38   63.22
  -1 -29  -8  301.91  107.65
   1  31  -7   68.87   55.07
   1 -31  -7   41.68   42.27
   1  31  -6   30.14   50.53
   1 -31  -6  145.02   66.69
   1  31  -5  981.52  259.94
   1 -31  -5 1554.87  149.17
  -1  31   4  169.19   73.58
   1  31  -4  897.74  195.79
  -1 -31   4  681.57  110.39
   1 -31  -4 1210.94  183.50
  -1  31   3  659.71  201.08
   1  31  -3 1287.32  180.29
  -1 -31   3 1032.67  125.72
   1 -31  -3 1040.25  137.49
  -1  31   2 1792.62  152.48
   1  31  -2 2468.50  236.80
  -1 -31   2 1867.92  191.86
   1 -31  -2 1839.60  207.90
   1  31  -1  215.16   67.92
  -1  31   1  114.81   47.87
  -1 -31   1  157.90   61.26
   1 -31  -1  193.51   67.87
   1  31   0  124.71   50.27
  -1  31   0  205.86   66.06
  -1 -31   0  107.77   34.11
   1 -31   0  201.83   69.00
   1  31   1 1804.70  129.07
  -1  31  -1 1734.27  336.03
   1 -31   1 1844.65  128.94
  -1 -31  -1 1942.18  272.25
   1  31   2   61.44   27.87
  -1  31  -2  206.97   81.74
   1 -31   2   96.50   41.91
  -1 -31  -2   65.31   41.94
   1  31   3   78.45   32.34
  -1  31  -3  164.38   58.82
   1 -31   3   83.36   43.08
  -1 -31  -3  250.13   92.50
   1  31   4  571.23  173.88
  -1  31  -4 1130.50  256.97
  -1 -31  -4 1201.08  188.78
  -1  31  -5  819.02  240.86
  -1 -31  -5 1010.71  244.29
  -1  31  -6  398.87  158.67
  -1 -31  -6  532.13  122.54
  -1  31  -7  179.86  118.75
  -1 -31  -7  182.60   68.65
   1 -33  -7  224.45   79.88
   1  33  -6   64.39   52.77
   1 -33  -6  155.47   63.33
   1  33  -5   28.79   36.84
   1 -33  -5  143.17   57.81
   1  33  -4   94.58   45.52
  -1 -33   4  131.72   60.19
   1 -33  -4    3.93   34.45
  -1  33   3 3135.26  179.86
   1  33  -3 3283.99  246.84
  -1 -33   3 3656.84  218.69
   1 -33  -3 3334.70  251.64
   1  33  -2 1746.56  120.76
  -1  33   2 1480.98  210.77
  -1 -33   2 1406.46  280.26
   1 -33  -2 1843.64  130.65
  -1  33   1  294.31   95.76
   1  33  -1  349.91  109.56
  -1 -33   1  384.62  102.71
   1 -33  -1  335.35   77.82
  -1  33   0 1125.70  126.63
   1  33   0 1218.93  184.46
  -1 -33   0 1142.15  183.70
   1 -33   0 1185.11  130.88
   1  33   1   -0.77   29.41
  -1  33  -1   -1.77   37.41
  -1 -33  -1    7.04   37.00
   1 -33   1   32.25   36.65
   1  33   2  176.07   54.66
  -1  33  -2  224.83   62.21
   1 -33   2  191.69   51.47
  -1 -33  -2   31.56   36.33
   1  33   3 4724.97  358.08
  -1  33  -3 5592.41  425.02
   1 -33   3 5249.54  408.12
  -1 -33  -3 5245.07  400.97
   1  33   4    4.15   18.33
  -1  33  -4  238.78  108.05
  -1 -33  -4   32.83   35.70
  -1  33  -5   63.82   80.98
  -1 -33  -5   26.57   35.83
  -1  33  -6  322.09   92.68
  -1 -33  -6  256.87  111.49
   1  35  -6  168.44   74.81
   1 -35  -6  246.70   74.26
   1  35  -5 1821.02  304.60
   1  35  -4   59.64   42.91
   1 -35  -4  145.66   66.00
   1  35  -3   93.95   34.65
  -1 -35   3   83.86   34.05
   1 -35  -3  142.56   66.97
   1  35  -2 2780.84  376.54
  -1  35   2 2891.72  228.03
  -1 -35   2 3134.33  247.11
   1 -35  -2 3211.59  258.07
   1  35  -1 1292.48  216.03
  -1  35   1 1013.13  169.95
  -1 -35   1  962.25  202.46
   1 -35  -1  988.25  217.85
  -1  35   0  623.87  190.32
   1  35   0 1177.05  200.78
  -1 -35   0 1024.51  240.63
   1 -35   0  832.83  221.38
   1  35   1  966.82  249.40
  -1  35  -1 1442.05  206.89
   1 -35   1 1293.56  268.02
  -1 -35  -1 1755.92  158.38
   1  35   2  146.21   54.08
  -1  35  -2  290.62  106.17
   1 -35   2  194.42   61.86
  -1 -35  -2  123.83   61.76
  -1  35  -3   71.25   35.45
   1 -35   3   20.81   26.93
  -1 -35  -3   80.78   41.34
  -1  35  -4 1460.24  244.07
  -1 -35  -4 1026.98  282.82
  -1  35  -5 1150.67  263.86
  -1 -35  -5  892.90  236.73
   1  37  -4   96.38   52.43
   1 -37  -4   69.77   52.59
   1  37  -3  943.27  258.74
  -1 -37   3  683.23  244.33
   1 -37  -3 1418.85  188.77
  -1  37   2   29.00   13.85
   1  37  -2   73.50   39.17
  -1 -37   2  158.44   59.90
   1 -37  -2   44.16   23.81
  -1  37   1   70.88   33.03
   1  37  -1   77.78   56.16
  -1 -37   1   43.72   48.17
   1 -37  -1   41.04   30.80
  -1  37   0  -12.68   28.72
   1  37   0   90.11   43.96
  -1 -37   0  -26.68   31.24
   1 -37   0  112.52   45.12
  -1  37  -1  163.19   62.26
   1  37   1   44.97   21.53
  -1 -37  -1  151.38   53.88
   1 -37   1  159.55   49.87
   1  37   2  -40.04   30.21
  -1  37  -2   46.25   53.49
   1 -37   2   14.45   24.16
  -1 -37  -2   -1.72   36.08
  -1  37  -3 2195.10  269.78
  -1 -37  -3 1548.17  342.66
  -1  37  -4   73.56   53.93
  -1 -37  -4    4.14   43.84
   1  39  -2  208.81   64.11
  -1 -39   2  306.08   92.14
   1 -39  -2  129.42   39.56
   1  39  -1   65.71   42.93
  -1  39   1   87.55   34.67
   1 -39  -1   -3.49   33.74
  -1 -39   1   45.06   44.54
  -1  39   0  340.89  131.23
   1  39   0  764.71  186.33
  -1 -39   0  764.31  221.48
   1 -39   0  685.58  230.23
   1  39   1  148.10   43.97
  -1  39  -1  122.95   49.02
   1 -39   1  175.26   68.14
  -1 -39  -1  141.34   54.83
   1  39   2  130.07   45.03
  -1  39  -2  118.72   65.92
  -1 -39  -2  240.11   72.96
   2   0 -11   86.91   41.38
   2   0 -10  359.86   92.11
   2   0  -9   31.42   25.93
   2   0  -8 4006.25  203.61
   2   0  -8 4147.73  193.08
  -2   0   8 4457.15  218.60
   2   0  -7   46.68   41.04
   2   0  -7   13.90   18.71
  -2   0   7   64.97   31.26
   2   0  -7   90.65   37.57
   2   0  -6    4.43   19.15
   2   0  -6   84.46   15.13
  -2   0   6   52.34   34.33
   2   0  -6   80.10   28.75
   2   0  -5   68.76   32.23
   2   0  -5   25.39   15.75
  -2   0   5   39.68   30.18
   2   0  -5   47.69   19.99
   2   0  -4  885.06   68.13
  -2   0   4  853.12   63.95
  -2   0   4  726.71   65.10
   2   0  -4  822.87   66.75
   2   0  -3   23.48   13.55
  -2   0   3   20.81   14.98
   2   0  -3   47.80   25.99
  -2   0   3  -32.28   19.67
   2   0  -284490.74 5837.75
  -2   0   273702.81 5092.67
  -2   0   283071.93 5741.88
   2   0  -276943.71 5318.20
   2   0  -1    9.90   10.35
  -2   0   1   34.15   14.42
   2   0  -1   24.51   18.27
  -2   0   1   25.33    9.64
  -2   0   0 6104.48  109.97
   2   0   0 6672.21  119.19
  -2   0   0 6362.36  113.99
  -2   0  -1   42.86   17.97
   2   0   1   71.63   26.74
  -2   0  -1    8.05    5.98
   2   0   1   45.81   15.41
   2   0   213682.71  260.07
  -2   0  -214670.10  251.02
  -2   0  -3   35.64   27.58
   2   0   3  -12.71   28.18
  -2   0  -3   22.29    8.53
   2   0   418823.76  555.68
  -2   0  -419281.53  556.88
  -2   0  -416926.60  480.48
  -2   0  -416429.08  461.02
   2   0   5  102.06   26.05
  -2   0  -5   89.94   40.33
  -2   0  -5   19.24   15.16
  -2   0  -5    5.21   14.31
   2   0   6 2381.65  146.07
  -2   0  -6 2513.18  131.30
  -2   0  -6 2389.13  110.97
  -2   0  -6 2241.39  102.23
   2   0   7  120.77   65.71
  -2   0  -7   78.16   56.31
  -2   0  -7  -14.51   15.46
  -2   0  -7   53.73   26.53
   2   0   8 1772.19  253.93
  -2   0  -8 1396.30  174.44
  -2   0  -8 1626.52  200.02
  -2   0  -9   10.31   14.98
  -2   0  -9   -6.84   13.52
  -2   0  -9   41.77   22.32
  -2   0 -10 3140.29  194.37
  -2   0 -10 2576.09  161.18
  -2   0 -11  149.69   67.46
  -2   0 -12   66.53   43.99
   2   2 -12  143.18   61.03
   2   2 -11  648.71  219.80
   2   2 -10  287.99   90.60
   2  -2 -10  273.12   74.17
   2   2  -9   86.99   35.21
   2  -2  -9   24.78   20.07
   2  -2  -9   40.44   31.21
  -2  -2   9    3.86   23.61
   2   2  -8 4998.69  257.53
  -2   2   8 4743.63  236.68
   2   2  -8 4549.83  211.81
   2   2  -8 4606.91  217.44
   2  -2  -8 4845.43  224.18
   2  -2  -8 4838.54  238.45
  -2  -2   8 5099.51  243.19
   2   2  -7   49.67   22.65
   2   2  -7   35.96   24.14
  -2   2   7   43.13   24.44
   2  -2  -7  128.84   37.85
  -2  -2   7   39.01   30.67
   2  -2  -7   36.21   27.56
   2  -2  -7  108.63   29.66
   2   2  -6   34.17   24.46
   2   2  -6   68.14   33.33
  -2   2   6   31.14   23.65
   2   2  -6   28.27   19.45
   2  -2  -6   42.93   15.61
   2  -2  -6   78.94   40.69
   2  -2  -6  121.12   40.92
  -2  -2   6   82.92   34.51
   2   2  -5 5966.11  210.53
   2   2  -5 5982.62  183.61
  -2   2   5 6452.28  198.35
   2   2  -5 5983.39  175.54
   2  -2  -5 6212.35  174.76
   2  -2  -5 7079.57  216.26
  -2  -2   5 6290.46  185.71
   2  -2  -5 6405.01  191.56
  -2   2   4 1600.68  124.14
   2   2  -4 1583.27  125.40
   2   2  -4 1545.12  115.21
   2  -2  -4 1472.06  106.29
   2  -2  -4 1735.51  150.88
   2  -2  -4 1448.81  111.35
  -2  -2   4 1550.82  118.78
  -2  -2   4 1761.54  128.33
   2   2  -3 5129.82  104.29
  -2   2   3 5500.06  100.00
   2   2  -3 5210.65  105.25
  -2   2   3 5263.09  117.30
   2  -2  -3 5179.52   93.69
   2  -2  -3 5139.39  108.40
  -2  -2   3 5109.85  100.67
  -2   2   216674.25  295.39
   2   2  -217429.03  299.85
   2   2  -217502.88  304.16
  -2   2   216225.18  274.47
   2  -2  -216598.26  279.30
   2  -2  -217159.30  302.09
  -2  -2   216561.38  285.19
  -2  -2   216598.33  290.29
  -2   2   1  985.37   63.12
  -2   2   1  939.52   57.05
   2   2  -1  932.35   56.12
   2   2  -1  940.02   62.53
  -2  -2   1  960.03   58.41
   2  -2  -1 1156.67   68.62
  -2  -2   1  952.70   60.10
   2  -2  -1  967.97   60.45
  -2   2   0   38.89   17.28
   2   2   0   21.50   11.37
  -2   2   0   57.48   17.12
   2   2   0   64.33   22.67
   2  -2   0   23.24   12.17
  -2  -2   0   33.71   13.47
   2  -2   0   50.96   14.72
  -2  -2   0   72.90   19.61
   2   2   114304.56  254.24
  -2   2  -114424.15  263.55
   2   2   113888.37  239.36
  -2   2  -113221.08  224.53
   2  -2   113168.74  242.34
  -2  -2  -113656.61  235.46
   2  -2   113655.48  231.00
  -2   2  -2 2921.55   77.43
   2   2   2 2550.97  181.26
  -2   2  -2 2970.41   55.32
  -2  -2  -2 3196.11   76.01
  -2  -2  -2 2950.61   75.44
   2  -2   2 2772.90  209.47
   2  -2   2 2645.02  184.51
   2   2   3 9046.57  188.94
  -2   2  -3 9743.87  198.04
  -2   2  -3 9230.75  163.89
  -2  -2  -3 8606.85  167.01
  -2  -2  -3 8792.29  162.43
  -2   2  -4 9808.62  279.06
  -2   2  -4 8641.10  274.74
   2   2   4 8226.05  257.94
  -2   2  -4 8791.38  251.33
  -2  -2  -4 7865.24  235.05
  -2  -2  -4 8757.48  253.88
   2  -2   4 8821.94  340.06
  -2   2  -5  871.72  122.23
   2   2   5 1073.08  131.34
  -2   2  -5  758.47   60.59
  -2   2  -5  945.86   72.78
   2  -2   5  976.48  208.01
  -2  -2  -5  742.89   64.20
  -2  -2  -5  789.34   95.99
  -2  -2  -5  952.89  119.98
  -2   2  -6 1318.13  231.64
   2   2   6 1655.85  226.98
  -2   2  -6 1401.37  159.21
  -2   2  -6 1229.24  140.40
   2  -2   6 1742.10  229.72
  -2  -2  -6 1129.00  135.66
  -2  -2  -6 1186.11  152.41
  -2  -2  -6 1412.79  161.76
  -2   2  -7 3926.13  209.11
   2   2   7 4253.62  313.81
  -2   2  -7 3553.81  188.93
  -2  -2  -7 3031.80  170.97
   2  -2   7 3785.17  452.92
  -2  -2  -7 3955.39  211.64
  -2  -2  -7 3719.89  212.55
   2   2   8 3280.62  243.88
  -2   2  -8 3156.78  161.86
  -2   2  -8 2802.77  133.97
  -2  -2  -8 2788.30  140.95
  -2   2  -9 1644.36  158.97
  -2   2  -9 1738.91  165.29
  -2  -2  -9 1629.15  194.76
  -2   2 -10  850.99   75.99
  -2   2 -10  633.25  128.67
  -2  -2 -10  734.61   59.42
  -2  -2 -10  635.52  130.87
  -2   2 -11   -1.31   26.83
  -2  -2 -11   21.97   33.88
  -2   2 -12  732.76  186.57
  -2  -2 -12  795.64  200.73
   2   4 -12  110.28   51.46
   2   4 -11   21.46   34.11
   2  -4 -11   84.42   37.27
   2   4 -10 3046.70  208.75
   2  -4 -10 3234.81  193.16
   2   4  -9  590.75  146.95
   2  -4  -9  594.39  152.53
   2  -4  -9  588.18  148.31
  -2  -4   9  477.01  161.09
   2   4  -8   34.26   25.53
   2   4  -8   50.23   25.56
   2   4  -8   40.85   16.39
   2  -4  -8   50.41   28.26
  -2  -4   8   43.32   23.88
   2  -4  -8  119.99   52.24
   2   4  -7 3212.26  225.91
   2   4  -7 3533.58  193.92
   2   4  -7 3288.74  179.84
  -2   4   7 3257.83  201.65
   2  -4  -7 3330.74  216.70
  -2  -4   7 3830.40  211.78
   2  -4  -7 2941.09  157.59
   2   4  -6 9112.02  394.77
   2   4  -6 9381.97  391.77
  -2   4   6 9773.86  426.21
   2   4  -6 9715.27  401.23
   2  -4  -6 8627.62  352.46
   2  -4  -610070.39  417.94
   2  -4  -6 9528.51  398.74
  -2  -4   610021.92  417.29
   2   4  -5  220.52   37.05
  -2   4   5  303.72   63.60
   2   4  -5  205.78   27.57
   2  -4  -5  184.76   33.75
   2  -4  -5  153.46   34.10
   2  -4  -5  238.81   36.93
  -2  -4   5  142.15   32.84
  -2   4   4 4945.69  166.40
   2   4  -4 4655.95  146.84
   2   4  -4 5180.18  156.75
   2  -4  -4 4812.08  138.50
   2  -4  -4 5991.68  183.16
  -2  -4   4 5425.41  168.55
   2  -4  -4 4822.09  153.08
  -2  -4   4 5462.53  167.17
  -2   4   3 7072.68  147.54
   2   4  -3 6731.91  130.33
   2   4  -3 7327.41  139.24
   2  -4  -3 7138.83  122.62
  -2  -4   3 6472.25  126.78
   2  -4  -3 6798.05  137.77
   2  -4  -3 6998.55  136.87
  -2  -4   3 6754.32  132.77
  -2   4   2 3272.09   57.44
  -2   4   2 2592.96  188.90
   2   4  -2 3438.02   74.73
   2   4  -2 3277.59   69.61
  -2  -4   2 3169.93   69.99
  -2  -4   2 3358.41   75.34
   2  -4  -2 3190.28   76.04
  -2   4   1 1530.95   93.42
  -2   4   1 1400.56   83.59
   2   4  -1 1490.85   87.14
   2   4  -1 1545.45   91.18
  -2  -4   1 1465.28   90.73
   2  -4  -1 1272.64   77.78
   2  -4  -1 1364.97   82.46
  -2  -4   1 1374.89   82.95
  -2   4   017800.15  312.21
  -2   4   017204.13  295.21
   2   4   018195.39  311.74
  -2  -4   018063.69  308.66
   2  -4   018458.79  315.29
   2   4   1 8544.11  154.34
   2   4   1 9736.92  174.54
  -2   4  -1 9216.72  158.38
   2  -4   1 9618.83  163.97
  -2  -4  -1 9488.34  170.88
  -2  -4  -1 9438.34  167.94
  -2   4  -317645.20  298.45
   2   4   318037.25  335.32
  -2   4  -316688.95  281.00
   2  -4   316070.77  341.06
  -2  -4  -315285.28  274.69
  -2   4  -4 2607.53   79.85
  -2   4  -4 2327.94  171.85
   2   4   4 2364.61   99.17
  -2   4  -4 2355.32   78.92
  -2  -4  -4 2551.56   91.20
  -2  -4  -4 2329.01  177.94
   2  -4   4 2376.91  188.30
   2   4   5 1499.43  156.17
  -2   4  -5 1592.67   84.48
  -2   4  -5 1491.16   60.06
  -2   4  -5 1635.36   62.02
   2  -4   5 1749.40  245.91
  -2  -4  -5 1421.73   65.25
  -2  -4  -5 1629.19  103.60
  -2  -4  -5 1421.42   70.25
  -2   4  -614627.32  614.80
   2   4   616978.33  715.37
  -2   4  -614801.35  600.77
  -2   4  -615478.83  627.64
   2  -4   613664.83  608.31
  -2  -4  -615606.55  642.09
  -2  -4  -614518.49  595.98
  -2  -4  -614912.60  616.78
   2   4   7 2074.45  213.50
  -2   4  -7 1820.86  139.12
  -2   4  -7 2134.97  164.79
  -2  -4  -7 1837.38  182.89
  -2  -4  -7 2169.31  175.16
  -2  -4  -7 2024.77  163.29
   2   4   8  905.46  155.15
  -2   4  -8  833.05  166.27
  -2   4  -8  785.55  172.65
  -2   4  -8  812.48  100.76
  -2  -4  -8  850.76  176.63
   2   4   9 2931.18  352.30
  -2   4  -9 3573.68  250.04
  -2   4  -9 3231.69  217.69
  -2   4  -9 3279.76  218.67
  -2  -4  -9 3471.70  239.84
  -2   4 -10  420.84   83.08
  -2  -4 -10  344.09   77.64
  -2  -4 -10  333.11   91.55
  -2  -4 -11  439.60  147.28
  -2  -4 -11  494.79  166.96
  -2   4 -12 2063.29  351.48
   2   6 -12  -28.57   30.53
   2  -6 -12  118.05   65.89
   2   6 -11 2594.98  206.69
   2   6 -10   36.19   35.57
   2  -6 -10   14.53   20.10
  -2  -6  10   21.56   32.61
   2   6  -9  510.42  140.89
   2  -6  -9  466.52  113.67
  -2  -6   9  329.18  140.39
   2   6  -8 1047.27  167.59
   2   6  -8 1302.32  170.62
   2  -6  -8 1183.55  174.85
  -2  -6   8 1330.46  219.95
   2  -6  -8 1667.07  457.42
   2   6  -7  146.96   55.50
   2   6  -7  224.72   64.97
   2   6  -7  194.10   53.87
   2  -6  -7  253.50   64.01
  -2  -6   7  309.01   77.69
   2  -6  -7  131.84   38.05
   2   6  -6   89.38   37.18
   2   6  -6   63.22   25.88
  -2   6   6   55.91   27.43
   2   6  -6   24.40   14.04
   2  -6  -6   56.84   19.42
   2  -6  -6   16.95   19.11
   2  -6  -6   53.37   22.76
  -2  -6   6   52.19   27.01
  -2   6   510553.41  320.03
   2   6  -510323.08  293.13
   2   6  -511592.07  320.91
   2  -6  -510121.70  273.87
   2  -6  -512548.93  343.59
  -2  -6   510800.83  304.50
   2  -6  -510340.42  295.56
  -2  -6   510851.86  302.29
   2   6  -4 3119.32   98.23
   2   6  -4 3311.39  112.49
  -2   6   4 3062.90  113.41
   2  -6  -4 3301.86   94.66
  -2  -6   4 3456.27  127.93
   2  -6  -4 3115.79  107.92
  -2  -6   4 3153.21  105.09
   2   6  -3  301.58   51.12
   2   6  -3  174.35   27.70
  -2   6   3  192.85   37.24
   2  -6  -3  170.52   31.14
  -2  -6   3  160.94   33.09
  -2  -6   3  211.94   33.27
   2   6  -2 4454.38   90.02
   2   6  -2 4417.18  104.59
  -2   6   2 4626.47  109.74
   2  -6  -2 4417.13   98.51
  -2  -6   2 4033.96   85.43
   2   6  -1  581.25   57.08
  -2   6   1  497.85   60.84
   2   6  -1  607.41   57.78
  -2   6   1  622.26   91.94
   2  -6  -1  481.78   53.63
   2  -6  -1  564.83   44.80
  -2  -6   1  716.01   80.96
  -2  -6   1  526.44   39.18
   2   6   011511.93  202.87
  -2   6   011633.11  210.77
   2   6   012294.06  217.36
  -2  -6   011353.01  199.80
   2  -6   011423.05  226.92
  -2  -6   012055.39  214.81
   2  -6   010827.80  191.35
  -2   6  -119006.38  351.37
   2   6   117110.09  298.42
   2   6   117810.70  309.35
  -2   6  -117139.88  291.35
   2  -6   116812.77  320.34
   2  -6   116857.10  285.29
  -2  -6  -117529.48  307.26
  -2  -6  -116503.53  285.01
   2   6   2  267.67   27.22
  -2   6  -2  268.86   58.96
   2   6   2  185.71   28.75
   2  -6   2  373.69   71.91
  -2  -6  -2  128.26   20.73
  -2  -6  -2  210.96   18.38
   2   6   3  838.28   71.67
  -2   6  -3 1185.07  109.61
   2  -6   3 1065.38  178.11
  -2  -6  -3  885.79   70.10
  -2  -6  -3  937.36  108.83
  -2   6  -4  429.00   32.38
  -2   6  -4  347.07   50.82
   2   6   4  503.92   61.97
  -2   6  -4  446.88   48.66
  -2  -6  -4  612.86   64.58
  -2  -6  -4  361.78   40.00
   2  -6   4  443.79  125.15
  -2   6  -5 5103.36  168.03
   2   6   5 4726.61  182.96
  -2   6  -5 4206.94  167.35
  -2   6  -5 4795.69  154.73
   2  -6   5 4694.44  198.92
  -2  -6  -5 5540.88  192.73
  -2  -6  -5 4884.82  184.18
   2   6   6 2948.58  238.68
  -2   6  -6 2308.55  183.95
  -2   6  -6 2798.94  195.76
  -2   6  -6 2630.13  183.22
  -2  -6  -6 3120.30  652.37
  -2  -6  -6 2614.18  190.03
  -2  -6  -6 2639.21  193.04
   2   6   7 4417.06  344.11
  -2   6  -7 3533.27  133.26
  -2   6  -7 4025.53  194.95
  -2   6  -7 3566.07  130.11
  -2  -6  -7 3410.30  147.36
  -2  -6  -7 4110.26  164.45
  -2  -6  -7 3849.36  197.76
   2   6   8  129.59   61.11
  -2   6  -8  137.74   45.17
  -2   6  -8  255.47   55.75
  -2   6  -8  150.63   47.59
  -2  -6  -8  256.42   63.86
  -2  -6  -8  140.84   56.10
   2   6   9  117.67   66.87
  -2   6  -9   77.85   39.12
  -2   6  -9   30.74   18.31
  -2  -6  -9  110.95   38.20
  -2   6 -10  558.44  110.16
  -2  -6 -10  517.75  100.93
  -2  -6 -10  343.44  105.65
  -2   6 -11 2342.41  377.20
  -2  -6 -11 2249.18  182.47
  -2   6 -12  358.39  210.76
   2   8 -12   93.02   33.39
   2  -8 -12   80.97   50.27
   2   8 -11 1823.17  158.73
   2   8 -10   73.56   40.16
   2  -8 -10   45.55   26.25
  -2  -8  10   21.34   37.86
   2   8  -9 1016.90  178.72
   2  -8  -9 1039.44  124.61
  -2  -8   9  637.97  199.38
   2   8  -8  426.63   93.06
   2   8  -8  707.87  135.76
   2  -8  -8  622.17  110.56
  -2  -8   8  492.21  132.70
   2  -8  -8  599.18  100.17
   2   8  -7  132.45   39.17
   2  -8  -7  115.32   33.99
   2  -8  -7  196.62   50.47
  -2  -8   7  214.68   58.01
   2   8  -6   26.76   21.81
   2   8  -6   12.41   24.62
   2   8  -6   51.23   20.42
   2  -8  -6   78.81   18.76
   2  -8  -6   31.24   15.98
   2  -8  -6   45.25   30.25
  -2  -8   6  111.39   36.66
   2   8  -5 6641.11  227.57
   2   8  -5 6799.29  224.74
  -2  -8   5 6814.33  231.47
   2  -8  -5 6321.69  218.53
  -2  -8   5 7148.54  240.01
   2  -8  -5 6388.12  202.82
   2   8  -4  152.61   32.24
   2   8  -4  150.81   30.26
  -2   8   4  162.36   41.79
   2  -8  -4  237.89   43.16
  -2  -8   4  233.48   30.45
  -2  -8   4  115.81   24.62
   2   8  -3 2275.04  166.47
   2   8  -3 2542.90   82.88
  -2   8   3 1940.24  167.69
   2  -8  -3 2318.97  169.27
  -2  -8   3 2417.73   83.92
  -2  -8   3 2327.45  167.91
  -2   8   2 2787.58  195.80
  -2   8   2 2727.42  204.29
   2   8  -2 2731.29  195.86
  -2   8   2 2836.02   51.90
   2   8  -2 2834.39  200.32
   2  -8  -2 2971.61   78.60
  -2  -8   2 3030.35   83.23
  -2  -8   2 2578.43  185.14
  -2   8   1  933.98   67.78
   2   8  -1  849.60   54.72
   2   8  -1 1042.91   98.23
  -2   8   1  951.80   67.97
  -2   8   1 1083.75  135.47
   2  -8  -1  894.84  105.21
  -2  -8   1  908.27   70.99
  -2  -8   1  754.17   52.53
  -2   8   0  914.51  102.28
   2   8   0  673.27   81.00
   2   8   0  642.08   43.52
   2  -8   0  696.03   84.73
  -2  -8   0  834.84   92.66
  -2  -8   0  605.87   40.64
  -2   8  -118416.72  347.87
   2   8   117588.28  309.16
   2  -8   118012.33  308.21
  -2  -8  -117953.18  309.53
  -2  -8  -117501.14  308.46
   2   8   2 1780.21  104.62
  -2   8  -2 2388.00  166.96
   2   8   2 2025.88  128.88
  -2  -8  -2 2215.84  127.32
   2  -8   2 1728.90  227.09
  -2  -8  -2 1612.46  101.52
   2  -8   2 2041.22  112.92
  -2   8  -317055.54  509.61
   2   8   315861.10  450.87
   2   8   316902.91  482.12
  -2  -8  -317640.23  494.82
  -2  -8  -316846.78  480.82
   2  -8   315619.95  477.88
  -2   8  -4 3326.73  149.24
   2   8   4 3192.08  150.68
  -2  -8  -4 2748.38   90.33
  -2  -8  -4 2602.80   92.41
  -2   8  -5  229.80   50.72
   2   8   5  122.39   46.17
  -2   8  -5  138.27   14.98
  -2   8  -5   93.14   30.72
  -2   8  -5  147.38   17.52
  -2  -8  -5   85.72   17.63
  -2  -8  -5  211.54   42.77
   2   8   6  124.50   53.06
  -2   8  -6  159.27   38.03
  -2   8  -6  149.32   31.09
  -2   8  -6  106.66   20.15
  -2  -8  -6  100.04   33.35
  -2  -8  -6   73.38   34.74
  -2  -8  -6  155.08   42.74
   2   8   7 5970.05  249.56
  -2   8  -7 6184.82  215.13
  -2   8  -7 5757.38  222.16
  -2   8  -7 5265.40  181.99
  -2  -8  -7 6564.46  243.24
  -2  -8  -7 5423.43  204.04
   2   8   8  173.21   64.65
  -2   8  -8   96.23   32.20
  -2   8  -8  136.33   67.74
  -2   8  -8  107.08   35.28
  -2  -8  -8  122.50   51.07
  -2  -8  -8   92.10   52.03
   2   8   9  761.48  127.22
  -2   8  -9  841.88  183.61
  -2   8  -9  697.62   73.98
  -2  -8  -9  820.45   97.79
  -2   8 -10  625.19  105.81
  -2  -8 -10  686.07  122.41
  -2   8 -11   83.79   42.14
  -2  -8 -11   92.66   56.28
   2  10 -12   72.89   42.93
   2 -10 -12   89.84   66.30
   2  10 -11  400.00  139.30
   2 -10 -11  450.46  156.57
   2  10 -10   22.92   43.78
  -2 -10  10   19.06   23.33
   2  10  -9 2823.50  203.18
   2 -10  -9 2662.41  175.93
  -2 -10   9 2751.49  203.16
   2  10  -8 7012.98  399.10
   2  10  -8 7551.86  438.70
   2 -10  -8 6587.19  370.01
  -2 -10   8 8186.79  471.35
   2 -10  -8 7772.05  436.16
   2  10  -7 2516.21  593.33
   2 -10  -7 2460.36  179.08
   2 -10  -7 2753.18   98.45
  -2 -10   7 2636.30  112.60
   2  10  -6  119.01   39.94
   2  10  -6   52.73   17.19
  -2 -10   6   30.80   27.62
   2 -10  -6   65.05   14.12
   2  10  -5 2186.01   94.24
   2  10  -5 2196.01   83.33
  -2 -10   5 2148.56   94.37
  -2 -10   5 2387.80   97.69
   2 -10  -5 2042.56   92.17
   2  10  -4 1021.08   82.90
   2  10  -4 1130.48  106.62
  -2 -10   4  912.48  157.19
  -2 -10   4 1031.05   80.20
   2 -10  -4  806.21   68.44
   2  10  -3 2415.61   89.00
   2  10  -3 2323.07  162.73
  -2 -10   3 2285.92  167.39
  -2 -10   3 2087.91  154.39
   2 -10  -3 2144.58  188.37
  -2  10   2 8939.15  170.61
   2  10  -2 8862.14  174.16
  -2  10   2 8841.00  153.22
   2  10  -2 8871.26  163.96
  -2 -10   2 8657.69  167.45
  -2 -10   2 9269.14  174.77
   2 -10  -2 8754.77  174.66
  -2  10   111999.31  245.00
   2  10  -112088.11  222.58
  -2  10   112563.84  221.59
   2  10  -112489.64  222.81
  -2 -10   112562.20  228.68
   2 -10  -112559.80  237.07
  -2  10   0 2538.76  255.96
   2  10   0 2210.79  130.86
   2  10   0 2370.19  144.00
  -2  10   0 2105.07  122.87
   2 -10   0 2145.14  137.94
  -2 -10   0 2190.49  153.42
  -2 -10   0 2377.34  137.37
  -2  10  -1 2278.33  228.26
   2  10   1 1871.49  114.24
  -2  10  -1 2039.08  119.66
   2  10   1 1780.58  106.97
  -2 -10  -1 1802.96  110.77
   2 -10   1 1950.37  124.36
  -2 -10  -1 1999.47  141.71
   2 -10   1 1926.33  119.12
  -2  10  -2 1231.55  135.67
   2  10   2  920.39   70.86
  -2  10  -2 1137.97   89.64
   2  10   2  914.57   74.19
  -2 -10  -2  993.36   73.71
   2 -10   2 1029.50   83.17
   2 -10   2 1123.61   91.75
  -2 -10  -2 1071.03   98.72
  -2  10  -3 6210.22  223.99
   2  10   3 7080.42  213.99
  -2  10  -3 5775.25  177.67
   2  10   3 5721.29  176.60
  -2 -10  -3 6483.68  194.72
  -2 -10  -3 6084.62  190.27
  -2  10  -414986.64  455.91
  -2  10  -414186.96  394.34
  -2 -10  -414650.04  398.95
  -2 -10  -413829.10  387.89
   2  10   511780.88  496.85
  -2  10  -510846.19  451.40
  -2 -10  -510775.02  440.80
  -2 -10  -5 9857.98  412.79
   2  10   6 2408.13  209.47
  -2  10  -6 2865.16  145.65
  -2  10  -6 3247.61  239.21
  -2  10  -6 2714.77  196.49
  -2 -10  -6 2796.97  151.71
  -2 -10  -6 2625.55  205.84
   2  10   7 3762.00  250.14
  -2  10  -7 2983.90  104.43
  -2  10  -7 3546.18  154.41
  -2  10  -7 3516.77  121.89
  -2 -10  -7 3162.02  211.22
  -2 -10  -7 3081.94  119.23
   2  10   8   37.97   39.68
  -2  10  -8  190.41   73.97
  -2  10  -8   44.96   16.92
  -2  10  -8   34.04   12.76
  -2 -10  -8  150.68   66.80
   2  10   9  910.05  168.60
  -2  10  -9 1006.26  117.54
  -2 -10  -9  743.13  155.01
   2  10  10 1296.12  343.14
  -2  10 -10 2241.37  351.95
  -2 -10 -10 2288.79  186.63
  -2  10 -11 1580.18  291.38
  -2 -10 -11  753.45  287.78
   2  12 -11   17.22   26.15
   2 -12 -11   63.69   32.19
   2  12 -10  226.34   56.67
  -2 -12  10   75.98   48.49
   2  12  -9 1735.59  303.17
  -2 -12   9 1695.61  295.89
   2  12  -8  770.28   89.77
   2  12  -8  712.00  114.74
   2 -12  -8  686.44   82.88
  -2 -12   8  785.31   95.37
   2 -12  -8  866.72  105.48
   2  12  -7 3807.62  160.61
   2  12  -7 3641.86  138.32
  -2 -12   7 3403.75  138.17
   2  12  -6 1005.30   88.62
   2  12  -6 1032.74  120.68
  -2 -12   6  942.66  140.88
   2  12  -5  187.25   47.01
   2  12  -5  248.03   36.46
  -2 -12   5  184.60   58.60
  -2 -12   5  237.76   47.86
   2 -12  -5  154.65   40.91
   2  12  -4 1071.61  173.99
   2  12  -4  747.56   84.72
  -2 -12   4  528.81  130.84
  -2 -12   4  713.01   80.36
   2 -12  -4  751.61  130.99
  -2  12   321180.53  564.89
   2  12  -322930.68  623.91
   2  12  -322027.44  591.08
  -2 -12   321866.39  593.96
  -2 -12   321228.02  573.04
   2 -12  -321895.87  601.97
  -2  12   2  979.48  111.06
   2  12  -2  987.19   83.57
  -2  12   2 1100.34   79.48
   2  12  -2 1090.14  103.04
  -2 -12   2 1027.98   81.97
  -2 -12   2 1255.07  112.15
   2 -12  -2 1103.96  156.37
  -2  12   1 8950.74  280.31
   2  12  -1 9758.27  286.78
   2  12  -1 9756.00  280.94
  -2  12   110043.71  285.87
   2 -12  -1 9199.85  280.20
  -2 -12   1 8614.11  251.45
  -2 -12   1 9236.12  268.59
  -2  12   0   46.63   16.21
   2  12   0   44.02   20.70
   2  12   0   74.82   22.43
  -2  12   0   42.51   25.51
   2 -12   0   27.57   19.19
  -2 -12   0   73.00   25.75
  -2 -12   0   69.27   17.75
   2 -12   0   60.97   23.27
  -2  12  -1  709.50  107.66
   2  12   1  636.77   51.86
   2  12   1  589.44   73.03
  -2  12  -1  626.00   54.18
   2 -12   1  741.40   91.70
  -2 -12  -1  610.98   75.13
  -2 -12  -1  860.63   99.46
   2 -12   1  778.09   92.03
  -2  12  -2 2218.97  324.81
   2  12   2 2519.97   87.48
  -2  12  -2 2284.70  166.90
   2  12   2 2412.84  146.14
  -2 -12  -2 2257.83  161.81
   2 -12   2 2296.72  171.36
  -2 -12  -2 2533.85   97.16
   2 -12   2 2220.17  166.34
  -2  12  -331131.62  872.02
   2  12   337933.77 3160.11
  -2  12  -332782.22 2732.06
  -2 -12  -331049.38  829.24
   2 -12   331272.68  827.52
  -2 -12  -333008.21 2751.50
  -2  12  -4 3055.69  175.05
   2  12   4 3333.33  128.87
  -2  12  -4 3662.87  140.55
  -2 -12  -4 3602.82  124.80
  -2 -12  -4 3079.96  123.09
   2  12   5 4626.86  207.06
  -2  12  -5 4063.79  182.73
  -2 -12  -5 4548.61  187.15
  -2 -12  -5 3864.87  170.60
   2  12   6   61.13   40.58
  -2  12  -6  137.49   46.06
  -2 -12  -6   21.62   10.04
  -2 -12  -6   67.03   48.63
   2  12   7   59.77   32.48
  -2  12  -7  339.16   69.54
  -2 -12  -7   95.27   31.49
  -2 -12  -7  104.86   49.98
   2  12   8   43.65   48.21
  -2  12  -8  150.72   62.57
  -2 -12  -8  -10.99   16.28
  -2 -12  -8   54.03   52.06
   2  12   9 6526.27  522.62
  -2  12  -9 7302.07  434.14
  -2 -12  -9 6892.93  401.78
   2  12  10  350.48  121.25
  -2  12 -10  390.87  138.91
  -2 -12 -10  488.06  116.40
  -2  12 -11  839.40  289.67
  -2 -12 -11  899.45  276.49
   2  14 -11  141.39   65.97
   2 -14 -11  177.19   71.93
   2  14 -10  220.88   77.50
   2 -14 -10  723.09  168.62
   2  14  -9 1382.68   91.25
   2  14  -8 3165.13  201.45
   2  14  -8 3093.97  185.31
  -2 -14   8 3009.78  184.51
   2  14  -7  289.74   59.30
   2  14  -7  190.69   59.50
  -2 -14   7  202.80   86.56
   2  14  -6  236.07   68.66
   2  14  -6  143.11   39.02
  -2 -14   6  247.55   61.12
   2  14  -5  439.50   74.28
   2  14  -5  300.69   60.37
  -2 -14   5  387.72   62.15
   2  14  -4   44.75   26.11
   2  14  -4   50.92   17.46
  -2 -14   4    4.00   26.84
  -2 -14   4   67.61   24.46
   2 -14  -4    9.38   19.39
  -2  14   3 1206.54  132.33
  -2  14   3 1680.47  116.45
   2  14  -3 1577.70  135.41
   2  14  -3 1555.36  115.00
  -2 -14   3 1420.65  109.40
  -2 -14   3 1678.19  126.24
   2 -14  -3 1440.87  200.17
  -2  14   211190.91  302.83
   2  14  -211149.43  314.93
   2  14  -211742.83  323.22
  -2 -14   210650.30  300.07
  -2 -14   210951.69  304.95
   2 -14  -210491.18  304.37
  -2  14   1 2464.02  186.79
  -2  14   1 2821.89   95.04
   2  14  -1 2677.07  103.35
   2  14  -1 2875.94  119.54
  -2 -14   1 2552.35   90.19
  -2 -14   1 2981.63  150.11
   2 -14  -1 2402.61   90.53
  -2  14   0 2749.44  258.16
   2  14   0 2904.68   96.96
   2  14   0 2814.21  101.58
  -2  14   0 2953.37  105.35
   2 -14   0 2691.76  112.78
  -2 -14   0 2862.43  133.81
  -2 -14   0 2746.25   91.70
   2 -14   0 2885.40   97.49
  -2  14  -1  483.54   67.07
   2  14   1  629.15   83.90
  -2  14  -1  398.57   43.61
   2  14   1  475.54   61.03
  -2 -14  -1  479.13   98.70
   2 -14   1  368.98   50.99
   2 -14   1  444.83   52.74
  -2 -14  -1  457.17   75.81
  -2  14  -2 3219.48  312.81
   2  14   2 3747.10  118.98
   2  14   2 3781.07  153.73
  -2  14  -2 3392.14  113.07
  -2 -14  -2 3366.20  151.15
   2 -14   2 3321.77  118.22
  -2 -14  -2 3328.02  106.68
  -2  14  -3 1772.40  137.37
   2  14   3 1612.54   66.99
  -2  14  -3 1814.06   86.96
  -2 -14  -3 1697.89   65.69
   2 -14   3 1757.47   64.69
  -2 -14  -3 1911.20  160.57
  -2  14  -4 8653.18  391.31
   2  14   4 9353.71  388.68
  -2  14  -4 9576.99  401.68
  -2 -14  -4 8897.04  364.91
  -2 -14  -4 9245.81  389.01
   2  14   5  199.13   47.90
  -2  14  -5  189.42   46.74
  -2 -14  -5  134.25   28.49
  -2 -14  -5  220.52   52.21
   2  14   6 2827.05  134.26
  -2  14  -6 2878.40  196.45
  -2 -14  -6 2502.88  595.14
   2  14   7  289.32   83.08
  -2  14  -7  458.63   81.78
  -2 -14  -7  502.29  102.50
   2  14   8 1127.77  212.89
  -2  14  -8 1164.32  151.72
  -2 -14  -8  899.85  155.50
   2  14   9  994.95  226.62
  -2  14  -9 1212.74  242.66
  -2 -14  -9 1421.50   92.16
  -2  14 -10 2290.07  235.70
  -2 -14 -10 2620.62  222.63
  -2  14 -11  103.02   44.05
  -2 -14 -11    8.14   23.82
   2  16 -11  580.97  185.97
   2 -16 -11  664.16  249.18
   2  16 -10  165.05   60.93
   2 -16 -10  166.73   71.92
   2  16  -9  145.63   64.32
  -2 -16   9  141.73   52.90
   2 -16  -9  128.21   56.24
   2  16  -8 1485.31  157.50
  -2 -16   8 1441.23  145.79
   2 -16  -8 1332.74  142.25
   2  16  -7  292.35   76.18
  -2 -16   7  113.69   46.06
   2  16  -6   29.88   28.48
   2  16  -6   20.07   21.89
  -2 -16   6   32.81   30.54
   2  16  -5 5443.77  292.69
   2  16  -5 5762.31  298.33
  -2 -16   5 5773.22  302.99
  -2  16   4   14.82    5.80
   2  16  -4  115.82   38.69
   2  16  -4   20.36   12.35
  -2 -16   4   53.82   23.97
  -2  16   3  784.06   70.02
   2  16  -3  832.97   84.25
   2  16  -3  821.83   93.05
  -2 -16   3  634.34  141.94
  -2 -16   3  991.21   93.41
   2 -16  -3  757.49  115.65
   2  16  -2 3011.42  134.84
  -2  16   2 2935.15  103.42
   2  16  -2 2828.94  102.97
  -2 -16   2 3096.35  119.01
  -2 -16   2 3018.18  112.16
   2 -16  -2 2681.64  160.51
   2 -16  -2 3177.14  122.96
  -2  16   1   46.59   21.68
  -2  16   1   29.46   25.27
   2  16  -1   56.47   27.62
   2  16  -1  107.01   32.83
  -2 -16   1   16.12   28.01
  -2 -16   1   70.75   24.54
   2 -16  -1   63.46   31.39
  -2  16   0 2213.06  253.83
   2  16   0 2195.13   81.01
   2  16   0 2169.14   80.41
  -2  16   0 2410.49  105.14
   2 -16   0 2133.21  142.05
  -2 -16   0 2224.14  152.00
  -2 -16   0 2408.46   83.48
   2 -16   0 2209.66   80.00
  -2  16  -1 3268.75  321.23
   2  16   1 3535.88  110.49
  -2  16  -1 3406.44  111.55
   2  16   1 3388.29  114.09
  -2 -16  -1 3480.05  108.19
   2 -16   1 3184.64  122.95
  -2 -16  -1 3512.23  162.43
   2 -16   1 3654.25  132.48
  -2  16  -2  561.75  110.40
   2  16   2  668.12   69.39
   2  16   2  671.68   82.85
  -2  16  -2  850.61  135.01
  -2 -16  -2  801.78   89.70
   2 -16   2  671.59   79.61
  -2 -16  -2  541.72   88.99
  -2  16  -3  488.08  115.05
   2  16   3  440.09   59.86
  -2  16  -3  466.62   65.54
  -2 -16  -3  410.41   87.35
   2 -16   3  537.64   74.26
  -2 -16  -3  508.03   89.21
   2  16   4  490.25   97.75
  -2  16  -4  475.66   78.52
  -2 -16  -4  347.79   49.25
   2 -16   4  288.30   50.21
   2 -16   4  430.55   54.84
  -2 -16  -4  510.52  119.13
   2  16   5 2402.97  187.61
  -2  16  -5 2703.80  209.70
  -2 -16  -5 2749.36  204.93
  -2 -16  -5 2885.96  266.62
   2  16   6  497.04  134.54
  -2  16  -6  833.42  140.46
  -2 -16  -6  431.98   90.53
  -2 -16  -6  553.25  104.57
   2  16   7 2041.74  271.16
  -2  16  -7 2803.09  251.47
  -2 -16  -7 2950.18  177.07
  -2 -16  -7 3123.27  234.88
   2  16   8  499.04  142.86
  -2  16  -8  716.32  126.90
  -2 -16  -8  775.91  168.50
   2  16   9   41.43   40.58
  -2  16  -9  365.42   84.33
  -2 -16  -9   72.28   30.06
  -2  16 -10  297.93  148.87
  -2 -16 -10  408.68  154.43
  -2  16 -11 1311.81  230.71
  -2 -16 -11  749.74  303.06
   2  18 -11  604.77  240.23
   2 -18 -11  727.70  321.92
   2  18 -10  205.72   83.92
   2 -18 -10  350.30  141.77
   2  18  -9  789.62  258.74
   2 -18  -9 1136.16  257.63
   2  18  -8   81.94   30.52
  -2 -18   8  109.39   43.35
   2 -18  -8  213.41   73.93
   2  18  -7  434.04  131.38
   2  18  -7  184.10   65.24
  -2 -18   7  236.59  109.88
   2 -18  -7  601.30  157.73
   2  18  -6 2122.15  218.42
   2  18  -6 1485.67  193.12
  -2 -18   6 1796.86  104.59
   2 -18  -6 1809.20  161.56
   2  18  -5 6724.86  287.71
  -2 -18   5 6490.95  238.33
   2 -18  -5 6603.44  248.29
  -2  18   4 1990.20  137.78
   2  18  -4 2191.90  166.60
   2  18  -4 2402.21  171.00
  -2 -18   4 2315.55  169.21
   2 -18  -4 2498.23  185.95
  -2  18   3   70.43   15.83
   2  18  -3  113.50   44.17
   2  18  -3   57.81   29.47
  -2 -18   3   85.07   28.70
   2 -18  -3   23.22   14.66
   2 -18  -3   40.60   24.08
   2  18  -2   69.90   45.98
  -2  18   2   92.71   19.82
   2  18  -2   98.28   31.18
  -2 -18   2   15.93   24.82
  -2 -18   2  123.76   36.32
   2 -18  -2   67.23   25.53
   2 -18  -2   40.49   27.97
  -2  18   1 1935.99   76.44
   2  18  -1 2090.00  137.00
   2  18  -1 1934.74  121.48
  -2 -18   1 1886.04   82.13
  -2 -18   1 2120.77  116.42
   2 -18  -1 1763.11  161.65
   2 -18  -1 1908.70  110.07
  -2  18   0 4225.65  311.09
   2  18   0 4708.90  166.03
   2  18   0 4729.86  165.49
  -2  18   0 5386.40  185.34
   2 -18   0 4380.91  230.86
  -2 -18   0 4812.99  208.51
  -2 -18   0 5081.98  176.09
   2 -18   0 5305.45  184.44
   2  18   114216.16  458.87
   2  18   114219.10  461.23
  -2  18  -114154.00  459.83
   2 -18   115021.13  481.68
  -2 -18  -114337.66  469.62
  -2 -18  -114278.88  459.60
  -2  18  -2  838.04  157.92
   2  18   2 1446.28  167.17
   2  18   2 1294.87  152.76
  -2  18  -2 1395.48  199.79
  -2 -18  -2 1001.31  125.04
   2 -18   2 1281.43  146.41
  -2 -18  -2 1036.15  126.13
   2  18   3   37.42   17.35
  -2  18  -3   25.01   26.78
  -2 -18  -3   25.99   12.37
   2 -18   3   18.80   11.96
  -2 -18  -3  -23.69   28.55
   2  18   4  205.18   68.18
  -2  18  -4  319.14   77.43
  -2 -18  -4  213.24   54.20
   2 -18   4  184.45   40.31
  -2 -18  -4  257.01   72.73
   2  18   5 4340.60  172.62
  -2  18  -5 4301.38  237.75
  -2 -18  -5 4140.36  150.69
  -2 -18  -5 4548.43  185.19
   2  18   6 3024.89  193.29
  -2  18  -6 2720.86  254.78
  -2 -18  -6 2601.15  560.48
  -2 -18  -6 2752.09  202.63
   2  18   7  777.80  173.49
  -2  18  -7  772.88  212.23
  -2 -18  -7  440.02  111.16
  -2 -18  -7  686.37  133.92
   2  18   8  107.74   51.59
  -2  18  -8  554.87  141.72
  -2 -18  -8  370.44  122.83
  -2  18  -9   85.91   46.78
  -2 -18  -9   61.59   57.27
  -2  18 -10   51.94   45.49
  -2 -18 -10  244.23   81.48
   2  20 -10 2081.84  410.48
   2 -20 -10 2494.56  424.39
   2  20  -9   17.74   40.99
   2 -20  -9  138.69   74.45
   2  20  -8  147.58   61.29
  -2 -20   8   42.74   26.56
   2 -20  -8  210.80   79.71
   2  20  -7  172.55   50.91
   2  20  -7   37.68   22.91
  -2 -20   7   94.90   43.12
   2 -20  -7   61.11   34.02
   2  20  -6 6868.40  404.67
   2  20  -6 6186.00  352.17
  -2 -20   6 6251.27  359.87
   2 -20  -6 7101.59  417.81
   2  20  -5   35.34   41.35
   2  20  -5   98.29   33.27
  -2 -20   5  116.17   42.15
   2 -20  -5   27.30   27.98
  -2  20   4 1978.35  145.64
   2  20  -4 2556.28  217.93
   2  20  -4 2257.14  192.05
  -2 -20   4 2346.78  193.92
   2 -20  -4 2690.47  290.36
  -2  20   3   37.40   15.38
   2  20  -3   66.76   28.13
  -2 -20   3  -56.69   19.81
   2 -20  -3   -3.67   25.62
  -2  20   2  322.22   57.70
   2  20  -2  394.79   78.21
   2  20  -2  201.85   37.89
  -2 -20   2  356.69   61.05
   2 -20  -2  261.99   49.12
   2 -20  -2  312.68   59.32
   2  20  -1  -10.85   28.05
  -2  20   1   70.66   21.09
   2  20  -1   -8.47   13.08
  -2 -20   1   20.82   31.38
  -2 -20   1    7.72   26.46
   2 -20  -1    3.94   16.22
   2 -20  -1   11.31   28.70
  -2  20   017385.19  728.98
   2  20   021072.70  856.86
  -2  20   022448.54 2781.08
   2  20   021473.68 2660.76
   2 -20   019515.62  800.49
  -2 -20   021805.87 2703.24
   2 -20   021717.53 2690.61
  -2 -20   020938.75  851.03
  -2  20  -1  666.81  147.41
   2  20   1  957.35  129.91
   2  20   1 1002.34  119.65
  -2  20  -1 1116.27  139.18
  -2 -20  -1 1078.22  163.00
   2 -20   1 1146.61  149.10
  -2 -20  -1  817.46  115.85
  -2  20  -2 2834.67  424.13
   2  20   2 3958.11  172.19
  -2  20  -2 3548.14  157.88
  -2 -20  -2 3466.05  147.53
  -2 -20  -2 3993.32  181.10
   2 -20   2 3783.99  189.97
   2  20   3   46.41   22.46
  -2  20  -3   84.07   36.78
  -2 -20  -3   52.07   23.64
   2 -20   3   23.16   12.16
  -2 -20  -3   36.28   30.12
   2  20   4   33.24   14.48
  -2  20  -4  123.02   55.49
   2 -20   4    2.55    7.32
  -2 -20  -4   12.25   31.51
   2  20   5   32.98   22.84
  -2  20  -5   32.97   35.41
  -2 -20  -5   22.07   16.22
  -2 -20  -5   67.07   49.55
   2  20   611904.29  683.34
  -2  20  -612995.76 2608.18
  -2 -20  -612796.05  726.41
  -2 -20  -613637.02 2736.82
   2  20   7  446.12  105.17
  -2  20  -7  613.49  110.05
  -2 -20  -7  758.77  102.80
   2  20   8 1153.17  181.00
  -2  20  -8 1514.18  225.94
  -2 -20  -8 1265.24  188.78
  -2  20  -9  211.11   80.30
  -2 -20  -9   54.93   34.33
  -2  20 -10  235.55   84.56
  -2 -20 -10  176.39   70.02
   2  22 -10  152.49   69.00
   2 -22 -10  154.50   66.52
   2  22  -9  102.12   50.41
   2 -22  -9   79.70   55.11
   2  22  -8   73.26   31.19
  -2 -22   8    7.44   29.34
   2 -22  -8   -0.68   34.32
   2  22  -7  116.31   39.17
  -2 -22   7   69.92   28.34
   2 -22  -7   31.14   45.04
   2  22  -6  411.23  120.29
   2  22  -6  135.19   51.27
  -2 -22   6  243.16   84.17
   2 -22  -6  409.66  118.57
   2  22  -5 4580.19  277.23
   2  22  -5 4974.41  286.29
  -2 -22   5 5564.17  323.08
   2 -22  -5 5365.82  317.08
  -2  22   4  214.83   68.91
  -2  22   4  679.23   89.47
   2  22  -4 1151.47  198.17
   2  22  -4  550.06  103.05
  -2 -22   4  884.58  170.64
   2 -22  -4 1028.81  179.76
  -2  22   3 2844.09  105.80
   2  22  -3 4070.42  218.12
   2  22  -3 3205.56  124.94
  -2 -22   3 3513.77  194.16
   2 -22  -3 3662.58  212.84
   2  22  -2  809.77  107.47
  -2  22   2  695.53  101.73
   2  22  -2  430.78   71.84
  -2 -22   2  590.60   62.31
   2 -22  -2  516.14   95.27
  -2  22   1   -1.96   13.41
   2  22  -1   83.08   36.57
  -2  22   1   28.94   19.01
   2  22  -1   14.29   15.04
   2 -22  -1   25.94   24.78
   2 -22  -1   42.14   20.65
  -2 -22   1   82.50   30.33
  -2  22   0 1936.52  259.12
   2  22   0 2924.75  209.46
  -2  22   0 3082.00  637.96
  -2 -22   0 2886.76  207.22
   2 -22   0 2142.12  252.02
  -2 -22   0 3011.93  219.38
   2 -22   0 2749.55  209.05
   2  22   1 7769.68  403.86
  -2  22  -1 8069.68  420.65
  -2 -22  -1 7684.76  398.73
   2 -22   1 7263.59  379.24
   2 -22   1 8704.34  450.15
  -2 -22  -1 8723.63  511.07
   2  22   2  113.94   39.82
  -2  22  -2  142.57   53.09
   2 -22   2   62.17   31.34
  -2 -22  -2   74.69   44.28
   2  22   3 1856.13  165.06
  -2  22  -3 2163.85  204.87
  -2 -22  -3 1556.33  120.17
   2 -22   3 1623.88  148.45
  -2 -22  -3 2291.32  185.90
   2  22   4 1498.69  185.33
  -2  22  -4 1866.40  185.99
  -2 -22  -4 1526.18  186.82
   2 -22   4 1349.44  193.49
   2 -22   4 1699.89  462.54
  -2 -22  -4 2088.01  210.55
   2  22   5  221.20   51.29
  -2  22  -5  268.51   61.26
  -2 -22  -5   83.03   35.95
   2 -22   5   82.60   29.41
   2 -22   5   56.98   24.84
  -2 -22  -5  234.57   79.47
   2  22   6 1331.26  140.96
  -2  22  -6 1415.89  151.05
  -2 -22  -6  679.22  201.21
  -2 -22  -6 1810.54  270.23
   2  22   7 2280.76  264.21
  -2  22  -7 3084.40  238.32
  -2 -22  -7 3059.71  201.54
  -2  22  -8  477.12  150.85
  -2 -22  -8  996.26  177.63
  -2  22  -9 1020.28  261.58
  -2 -22  -9  694.83  200.24
  -2  22 -10  302.64   94.82
  -2 -22 -10  645.74  170.67
   2  24  -9  271.10   80.77
   2 -24  -9  246.07  105.57
   2  24  -8 2667.31  222.21
   2 -24  -8 2434.01  205.05
   2  24  -7  339.78   87.85
  -2 -24   7  288.26   99.11
   2 -24  -7  388.90  110.73
   2  24  -6   20.70   30.25
  -2 -24   6  104.66   40.22
   2 -24  -6   63.62   37.13
  -2  24   5   93.44   26.70
  -2  24   5   41.08   12.24
   2  24  -5  149.93   68.76
   2  24  -5   18.70   24.02
  -2 -24   5   90.18   33.98
   2 -24  -5  236.35   79.55
  -2  24   4  153.91   58.21
  -2  24   4  248.39   58.84
   2  24  -4  364.83   76.22
   2  24  -4  252.42   55.89
  -2 -24   4  297.76   53.46
   2 -24  -4  455.47   88.06
  -2  24   3  237.66   50.06
   2  24  -3  217.84   64.44
   2  24  -3  197.84   57.48
  -2 -24   3  224.45   75.34
   2 -24  -3  277.77   73.20
  -2  24   2 5757.10  206.30
   2  24  -2 5858.65  222.75
  -2 -24   2 5348.28  203.47
   2 -24  -2 5357.20  232.39
   2  24  -1 2672.39  215.25
  -2  24   1 2832.97  226.01
  -2 -24   1 2291.94  269.71
   2 -24  -1 2195.83  186.59
   2  24   0 1073.29  112.08
  -2  24   0  981.46  107.73
   2 -24   0  571.63   73.06
  -2 -24   0  777.73  100.15
   2 -24   0  923.54   82.46
   2  24   1  267.17   61.80
  -2  24  -1  146.23   53.42
   2 -24   1  140.86   41.40
   2 -24   1  328.39   80.61
  -2 -24  -1  424.89  102.44
   2  24   2  721.93  126.59
  -2  24  -2  826.35  123.04
  -2 -24  -2  452.13  124.73
   2 -24   2  853.01   76.52
  -2 -24  -2  948.84  102.05
   2  24   3 1002.66  163.33
  -2  24  -3 1306.52  252.37
  -2 -24  -3  629.35  144.39
   2 -24   3  802.70  122.13
   2 -24   3 1000.96  145.23
  -2 -24  -3 1273.27  165.36
   2  24   4 4641.16  271.55
  -2  24  -4 5056.82  317.15
  -2 -24  -4 5308.49  305.87
   2 -24   4 4960.94  282.65
  -2 -24  -4 6314.72  412.79
   2  24   5   58.07   37.80
  -2  24  -5   19.88   33.19
   2 -24   5    7.55    6.14
  -2 -24  -5  142.09   57.95
   2  24   6  231.62   61.96
  -2  24  -6  512.72  101.58
  -2 -24  -6  449.34  120.27
   2  24   7  342.05   82.48
  -2  24  -7  585.53  106.26
  -2 -24  -7  555.57  141.05
  -2  24  -8 1164.00  229.07
  -2 -24  -8  986.77  230.67
  -2  24  -9  210.45   88.14
  -2 -24  -9  113.13   73.64
   2  26  -9  841.30  195.09
   2 -26  -9  636.01  215.48
   2  26  -8 2355.00  197.80
   2 -26  -8 2404.46  247.61
   2  26  -7  885.94  143.68
  -2 -26   7  345.46  140.90
   2 -26  -7  646.97  167.61
   2  26  -6  392.61  107.16
  -2 -26   6  256.48   69.34
   2 -26  -6  403.23  104.41
   2  26  -5  -19.00   43.05
  -2 -26   5   37.98   24.85
   2 -26  -5   16.50   18.03
  -2  26   4  570.91  174.25
  -2  26   4 1173.08  121.55
   2  26  -4 2268.38  306.74
  -2 -26   4 2224.15  233.56
   2 -26  -4 1993.55  304.84
  -2  26   3 2116.42  240.23
   2  26  -3 3156.52  303.68
  -2 -26   3 2290.83  319.37
   2 -26  -3 2169.39  251.15
  -2  26   2 3709.62  351.04
  -2  26   2 5634.09  330.06
   2  26  -2 6661.01  389.62
  -2 -26   2 5432.17  318.40
   2 -26  -2 5530.89  327.00
   2  26  -1 2440.62  189.07
  -2  26   1 2443.43  122.91
  -2 -26   1 1999.48  206.60
   2 -26  -1 2169.29  200.87
   2  26   0 1695.09  463.60
  -2  26   0 1839.44  155.92
  -2 -26   0 1751.80  147.27
   2 -26   0 1683.10  484.23
   2  26   1  115.66   44.36
  -2  26  -1  147.03   55.38
   2 -26   1   19.72   14.94
  -2 -26  -1   55.25   32.42
   2 -26   1   43.06   35.09
   2  26   2 3749.92  223.85
  -2  26  -2 4164.03  253.15
   2 -26   2 2885.54  269.13
   2 -26   2 4134.52  242.80
  -2 -26  -2 4032.12  246.84
   2  26   3 5112.38  298.58
  -2  26  -3 5583.39  328.99
   2 -26   3 4748.13  294.92
   2 -26   3 4842.66  282.32
  -2 -26  -3 6368.29  415.36
   2  26   4 2986.34  182.44
  -2  26  -4 3565.35  279.66
   2 -26   4 3260.08  191.71
  -2 -26  -4 3971.32  250.75
   2  26   5  183.64   61.53
  -2  26  -5  353.65   88.78
   2 -26   5  299.60   61.15
  -2 -26  -5  422.06  118.73
   2  26   6  268.43   74.88
  -2  26  -6  410.91  145.25
  -2 -26  -6  197.76   64.12
  -2  26  -7   47.81   48.47
  -2 -26  -7   88.40   40.51
  -2  26  -8 2010.67  359.84
  -2 -26  -8 2412.07  397.00
  -2  26  -9 1992.80  342.44
  -2 -26  -9 1608.76  392.75
   2  28  -8   97.95   50.85
   2 -28  -8  218.89   89.06
   2  28  -7 1343.83  283.57
   2 -28  -7 1067.23  301.92
   2  28  -6  566.22  163.99
  -2 -28   6  290.08  126.09
   2 -28  -6  698.97  132.57
   2  28  -5   60.86   40.90
  -2 -28   5   48.26   29.01
   2 -28  -5  184.94   71.98
  -2  28   4  149.49   61.91
   2  28  -4  396.17   94.21
  -2 -28   4  409.33   90.19
   2 -28  -4  388.70   92.98
  -2  28   3 1835.04  179.14
   2  28  -3 2614.93  282.93
  -2 -28   3 2213.94  217.10
   2 -28  -3 2179.03  268.61
   2  28  -2 1746.78  219.67
  -2  28   2 1479.75  201.48
  -2 -28   2 1769.79  192.56
   2 -28  -2 1709.18  261.39
   2  28  -1  347.96  123.69
  -2  28   1  398.13  121.21
  -2 -28   1  691.49  108.92
   2 -28  -1  363.51   98.19
   2  28   0  456.13  154.17
  -2  28   0  540.66  137.60
  -2 -28   0  402.59  107.05
   2 -28   0  571.10  142.13
   2  28   1  126.00   47.78
  -2  28  -1  176.98   67.84
  -2 -28  -1   65.07   42.87
   2 -28   1   89.97   37.25
   2  28   2  496.35  173.07
  -2  28  -2  609.53  182.16
   2 -28   2  724.92  110.31
  -2 -28  -2  881.03  114.00
   2  28   3 2254.47  214.89
  -2  28  -3 2445.35  179.10
   2 -28   3 2370.12  205.88
  -2 -28  -3 2773.87  304.29
   2  28   4  118.51   38.65
  -2  28  -4  195.07   59.24
   2 -28   4  118.86   37.94
  -2 -28  -4   48.42   42.19
   2  28   5  304.06  120.72
  -2  28  -5  544.90  171.50
  -2 -28  -5  761.39  125.82
   2  28   6  276.83   74.63
  -2  28  -6  615.35  144.24
  -2 -28  -6  606.57  141.87
  -2  28  -7  178.69   60.54
  -2 -28  -7   35.16   40.91
  -2  28  -8   78.94   26.10
  -2 -28  -8  132.15   62.18
   2  30  -8  493.27  167.99
   2 -30  -8  694.10  235.76
   2  30  -7   47.31   42.32
   2 -30  -7  110.47   59.24
   2  30  -6  240.80   93.01
   2 -30  -6  311.96  132.55
   2  30  -5  738.48  122.16
   2 -30  -5  635.78  115.76
  -2  30   4  153.86   49.90
   2  30  -4  558.34  129.72
  -2 -30   4  399.80   89.86
   2 -30  -4  398.08  108.36
  -2  30   3   16.02   11.21
   2  30  -3   76.68   38.64
  -2 -30   3   55.57   29.95
   2 -30  -3    4.77   30.93
  -2  30   2  268.62   87.84
   2  30  -2  491.80   83.84
  -2 -30   2  304.91   75.80
   2 -30  -2  235.53   63.17
   2  30  -1  418.31  119.88
  -2  30   1  365.15   90.74
  -2 -30   1  464.61   92.07
   2 -30  -1  417.53   93.50
   2  30   0 2302.01  515.02
  -2  30   0 2686.51  190.46
  -2 -30   0 2190.65  281.75
   2 -30   0 2397.64  295.74
   2  30   1 1020.05  180.19
  -2  30  -1 1288.95  135.25
  -2 -30  -1 1137.04  160.88
   2 -30   1 1311.74  160.04
   2  30   2   52.19   29.77
  -2  30  -2  -17.96   42.94
   2 -30   2  131.21   50.59
  -2 -30  -2  -18.07   34.41
   2  30   3   84.32   33.28
  -2  30  -3  154.38   65.83
   2 -30   3   36.04   32.14
  -2 -30  -3   50.16   58.95
   2  30   4  530.43  116.32
  -2  30  -4  867.51   77.65
   2 -30   4  321.37   96.08
  -2 -30  -4  761.94  137.11
   2  30   5  443.38  137.57
  -2  30  -5  908.01  159.97
  -2 -30  -5  744.68  161.98
  -2  30  -6 2559.27  213.60
  -2 -30  -6 2874.53  239.29
  -2  30  -7  785.37  206.47
  -2 -30  -7  791.02  234.66
   2  32  -7  106.14   36.23
   2 -32  -7   32.54   42.32
   2  32  -6  525.33  132.86
   2 -32  -6  248.66   79.86
   2  32  -5 3122.43  251.13
  -2 -32   5 2207.20  179.32
   2 -32  -5 2300.08  292.56
   2  32  -4  144.71   68.67
  -2 -32   4   63.40   28.04
   2 -32  -4  107.21   55.57
  -2  32   3   30.16   22.29
   2  32  -3  138.85   66.22
  -2 -32   3   76.20   35.31
   2 -32  -3   28.74   35.83
  -2  32   2   98.64   28.16
   2  32  -2   99.69   35.38
  -2 -32   2  116.66   57.71
   2 -32  -2   38.85   36.29
   2  32  -1  985.82   72.49
  -2  32   1  803.65  150.29
  -2 -32   1 1084.99   75.21
   2 -32  -1 1083.06   76.15
   2  32   0  500.57  133.53
  -2  32   0  723.41  132.29
  -2 -32   0  346.18  107.99
   2 -32   0  600.53  157.31
   2  32   1 5237.24  314.12
  -2  32  -1 5411.08  363.47
   2 -32   1 5566.84  366.85
  -2 -32  -1 5676.14  351.08
   2  32   2  288.93  106.10
  -2  32  -2  401.89  105.96
  -2 -32  -2  364.98  102.17
   2 -32   2  313.36   84.50
   2  32   3  499.42  165.59
  -2  32  -3 1063.99  233.31
   2 -32   3 1063.60  154.08
  -2 -32  -3 1121.79  185.49
  -2  32  -4  580.85  192.83
  -2 -32  -4  511.89  157.49
  -2  32  -5  718.47  175.21
  -2 -32  -5  760.62  184.07
  -2  32  -6  361.00  112.46
  -2 -32  -6  331.36   98.95
  -2  32  -7 2715.60  449.11
  -2 -32  -7 2825.55  521.40
   2  34  -6  317.86   97.50
   2 -34  -6  270.94   76.34
   2  34  -5 2064.89  345.59
   2  34  -4  571.83  139.89
  -2 -34   4  315.11  111.94
   2 -34  -4  592.39  133.12
   2  34  -3  646.69  165.24
  -2 -34   3  467.80  129.82
   2 -34  -3  545.47  141.63
  -2  34   2 1291.23  240.64
   2  34  -2 1182.11  286.63
  -2 -34   2 1447.65  243.18
   2 -34  -2 1259.33  257.98
   2  34  -1  926.16  168.02
  -2  34   1  679.64  162.67
  -2 -34   1  856.72  175.96
   2 -34  -1 1014.86  186.96
   2  34   0 1417.63  204.86
  -2  34   0 1120.47  275.04
  -2 -34   0 1520.46  245.58
   2 -34   0 1252.61  274.04
   2  34   1 1389.57  128.13
  -2  34  -1 1432.69  182.48
  -2 -34  -1 1026.95  233.15
   2 -34   1 1230.09  254.65
   2  34   2   57.24   34.54
  -2  34  -2  -26.78   44.19
   2 -34   2    3.94   19.60
  -2 -34  -2   32.01   32.78
   2  34   3  993.94  280.44
  -2  34  -3 1723.81  203.42
  -2 -34  -3 1639.12  256.80
   2  34   4  596.98  144.40
  -2  34  -4  813.55  271.07
  -2 -34  -4 1334.28  229.01
  -2  34  -5  977.75  327.80
  -2 -34  -5 1170.86  334.97
  -2  34  -6  339.02  107.92
  -2 -34  -6  253.46   82.50
   2  36  -5  187.86   65.66
   2 -36  -5   33.89   37.97
   2  36  -4  397.95  123.06
  -2 -36   4  246.16   76.60
   2 -36  -4  176.61   80.11
   2  36  -3 1123.72  270.82
  -2 -36   3  556.44  252.80
   2 -36  -3 1015.33  268.98
   2  36  -2  178.18   58.48
  -2  36   2  106.04   39.79
  -2 -36   2  132.97   53.24
   2 -36  -2  167.28   56.42
  -2  36   1   87.84   28.34
   2  36  -1   99.20   36.45
  -2 -36   1  107.29   48.91
   2 -36  -1  131.06   48.08
  -2  36   0 1267.70  247.81
   2  36   0 1532.73  140.64
  -2 -36   0 1085.12  269.27
   2 -36   0 1235.40  267.55
   2  36   1  121.94   52.74
  -2  36  -1  136.69   54.65
   2 -36   1  135.38   49.71
  -2 -36  -1  132.67   60.29
   2  36   2  660.33  276.01
  -2  36  -2  852.58  288.22
   2 -36   2 1303.44  215.87
  -2 -36  -2 1054.64  274.37
   2  36   3 1485.91  241.70
  -2  36  -3 2055.40  337.67
  -2 -36  -3 1669.51  391.70
  -2  36  -4  234.51   79.02
  -2 -36  -4  255.04  124.23
  -2  36  -5   84.08   29.76
  -2 -36  -5  152.81   63.48
   2  38  -3  898.06  256.84
  -2 -38   3  784.57  250.71
   2 -38  -3  920.93  166.08
  -2 -38   2  225.33   82.62
   2 -38  -2  167.60   72.13
  -2  38   1   39.88   29.84
   2  38  -1  131.90   63.47
  -2 -38   1  156.96   60.83
   2 -38  -1  289.74   80.42
   2  38   0   86.62   39.49
  -2  38   0  160.19   49.49
  -2 -38   0  130.86   67.98
   2 -38   0   74.48   42.41
   2  38   1  203.41   64.83
  -2  38  -1  -49.64   43.17
   2 -38   1    6.31   25.45
  -2 -38  -1   13.25   29.63
   2  38   2   52.17   34.82
  -2  38  -2  162.90   68.78
  -2 -38  -2  167.13   66.54
  -2  38  -3  957.12  261.06
  -2 -38  -3 1687.21  285.01
   3   1 -11  533.73  133.75
   3   1 -10  444.34  122.38
   3  -1 -10  621.77  169.61
  -3  -1  10  471.08  157.68
  -3   1   9 2252.89  340.82
   3   1  -9 2340.16  273.49
   3  -1  -9 2536.31  511.92
  -3  -1   9 2945.19  189.49
   3  -1  -9 1622.36  257.23
   3   1  -812543.29  575.80
  -3   1   813056.02  587.93
   3   1  -811513.73  517.46
   3  -1  -812498.02  550.73
  -3  -1   813066.98  587.79
   3  -1  -814040.78  639.14
   3   1  -7 3554.71  306.28
  -3   1   7 4065.33  225.67
   3   1  -7 3424.85  186.28
   3   1  -7 3622.83  198.97
  -3  -1   7 3591.58  222.15
   3  -1  -7 3572.77  265.92
   3  -1  -7 3416.81  190.36
   3  -1  -7 3427.12  184.76
   3   1  -6 3686.96  182.37
  -3   1   6 4159.79  197.26
   3   1  -6 3622.02  187.86
   3   1  -6 3828.30  180.86
   3  -1  -6 3768.02  161.05
  -3  -1   6 4346.77  199.00
   3  -1  -6 4256.65  189.78
   3  -1  -6 3780.53  213.05
   3   1  -5  134.54   23.17
  -3   1   5    3.28   25.98
   3   1  -5  109.92   19.58
   3  -1  -5  194.49   31.28
  -3  -1   5   35.35   23.51
   3  -1  -5  100.01   27.12
  -3  -1   5   70.06   18.78
   3   1  -4  341.19   53.09
  -3   1   4  117.85   16.79
  -3   1   4  312.28   45.92
   3   1  -4  211.01   36.95
   3  -1  -4  262.61   47.95
  -3  -1   4  205.80   31.47
  -3  -1   4  244.12   40.31
   3  -1  -4  244.72   37.17
   3   1  -317384.82  301.08
  -3   1   315642.33  270.39
   3   1  -317591.52  312.37
  -3   1   317743.61  319.91
   3  -1  -317471.48  298.51
  -3  -1   318119.07  326.76
  -3  -1   316200.48  283.41
   3  -1  -316616.42  296.56
  -3   1   253128.44 3674.72
  -3   1   250210.80 3470.10
   3   1  -250994.06 3524.66
   3   1  -252758.01 3648.25
  -3  -1   252948.30 3659.84
   3  -1  -237324.60  635.77
   3  -1  -252961.14 3660.19
  -3  -1   248685.17 3367.30
  -3   1   114955.55  258.23
   3   1  -114870.72  258.27
  -3   1   114412.71  255.56
   3   1  -113263.50  233.48
   3  -1  -113328.17  231.37
  -3  -1   115283.56  271.18
   3  -1  -114802.21  260.47
  -3  -1   114463.30  249.57
  -3   1   0 2048.67  122.28
  -3   1   0 2341.51  135.17
   3   1   0 2669.88  192.43
   3   1   0 2250.29  128.74
   3  -1   0 2180.76  128.07
  -3  -1   0 2045.16  118.07
   3  -1   0 2071.72  118.03
  -3  -1   0 2090.93  121.30
   3   1   1 3952.79   97.90
  -3   1  -1 3909.95   93.01
  -3   1  -1 3904.67   77.06
   3   1   1 3781.05   75.26
  -3  -1  -1 3731.27   84.33
  -3  -1  -1 3879.84   78.60
   3  -1   1 3904.37   74.73
   3   1   2 1942.08  128.08
  -3   1  -2 1494.85   86.37
   3   1   2 1431.06   85.80
  -3   1  -2 1209.21   76.95
  -3  -1  -2 1550.14   94.12
   3  -1   2 1532.31  138.69
  -3  -1  -2 1587.92  113.56
   3  -1   2 1509.43   87.02
   3   1   3 7621.21  227.50
   3   1   3 7943.82  257.62
  -3   1  -3 8307.40  235.02
   3  -1   3 7592.47  239.30
  -3  -1  -3 8742.50  249.31
   3  -1   3 8184.57  233.87
  -3  -1  -3 7827.49  235.84
  -3   1  -413261.26  357.85
  -3   1  -414598.25  417.23
  -3  -1  -411801.72  334.54
  -3  -1  -413263.72  361.26
   3  -1   413885.10  415.16
  -3   1  -510971.61  375.53
   3   1   510270.83  380.53
  -3   1  -510153.89  325.48
  -3   1  -5 9770.63  325.35
   3  -1   510429.81  376.52
  -3  -1  -5 8561.16  291.23
  -3  -1  -5 9364.05  305.41
  -3  -1  -5 8227.23  269.79
   3   1   6 1071.79  153.05
  -3   1  -6 1266.14  113.04
  -3   1  -6 1104.19   83.75
  -3   1  -6  896.40   69.81
   3  -1   6 1138.74  208.22
  -3  -1  -6  889.37   80.08
  -3  -1  -6  963.33   76.02
  -3  -1  -6  961.58   78.48
  -3   1  -7  114.46   33.97
   3   1   7  125.71   76.64
  -3   1  -7   94.47   33.16
  -3  -1  -7   76.46   26.25
   3  -1   7  103.53   48.25
   3   1   8 2625.32  597.80
  -3   1  -8 2261.87  253.94
  -3  -1  -8 2387.78  266.29
   3  -1   8 2698.38  387.51
   3   1   9 1823.91  388.73
  -3   1  -9 2017.82  192.04
  -3  -1  -9 1982.74  191.54
  -3   1 -10 2488.09  175.92
  -3  -1 -10 2359.99  147.27
  -3   1 -11  305.76   98.32
  -3  -1 -11  394.64  101.45
   3   3 -11  293.87   92.98
   3   3 -10 1456.00  122.43
   3  -3 -10 1509.36  140.47
  -3  -3  10 1231.74  235.19
  -3   3   9 1015.42  247.97
   3   3  -9 1092.93  146.69
   3  -3  -9 1026.40  152.04
  -3  -3   9 1210.75  205.98
   3  -3  -9  615.60  239.47
   3   3  -8   57.77   35.92
  -3   3   8   -8.50   25.53
   3   3  -8   42.60   28.98
   3  -3  -8   72.27   27.79
  -3  -3   8   18.94   36.68
   3  -3  -8   49.71   29.66
   3   3  -7 4110.29  237.46
   3   3  -7 4357.45  239.71
  -3   3   7 4450.16  247.12
   3  -3  -7 5471.78  299.86
   3  -3  -7 4207.50  221.89
  -3  -3   7 5142.19  280.95
   3   3  -6 3771.99  166.63
   3   3  -6 3500.83  155.62
  -3   3   6 3995.97  191.14
   3  -3  -6 4117.44  223.92
   3  -3  -6 3609.31  167.95
  -3  -3   6 3429.31  159.72
   3  -3  -6 3878.19  163.27
  -3   3   5 3806.53  134.61
   3   3  -5 3957.88  124.38
   3   3  -5 3730.39  118.28
   3  -3  -5 4052.37  121.33
   3  -3  -5 3808.40  186.24
   3  -3  -5 3741.17  123.76
  -3  -3   5 3659.80  121.78
  -3  -3   5 3869.90  121.33
  -3   3   4 8666.14  262.51
   3   3  -4 8459.17  246.03
  -3   3   4 8277.63  233.93
   3   3  -4 8054.06  238.35
   3  -3  -4 8077.04  228.06
   3  -3  -4 8082.95  242.61
  -3  -3   4 8686.67  259.58
  -3  -3   4 7803.28  228.20
  -3   3   3 4952.16   91.02
  -3   3   3 5347.06  118.14
   3   3  -3 5880.34  119.92
  -3  -3   3 4867.63  100.81
   3  -3  -3 5313.94   96.99
  -3  -3   3 5237.97  117.66
   3  -3  -3 5740.66  122.72
  -3   3   2 2027.43  113.73
   3   3  -2 1993.65  114.82
   3   3  -2 2002.42  116.79
  -3   3   2 1856.01  113.22
   3  -3  -2 1903.25  107.46
   3  -3  -2 1895.78  127.76
  -3  -3   2 1919.55  116.12
  -3  -3   2 2027.76  117.13
  -3   3   1 3775.19   87.68
  -3   3   1 3304.68   65.47
   3   3  -1 3447.63   72.05
   3   3  -1 2693.93  191.44
  -3  -3   1 3617.80   73.55
   3  -3  -1 3484.31   76.46
   3  -3  -1 3486.89   75.20
  -3  -3   1 3415.10   76.84
  -3   3   012136.46  218.34
   3   3   012858.33  229.01
   3   3   012424.25  218.34
  -3   3   012493.56  222.68
   3  -3   012799.62  224.15
  -3  -3   013243.22  234.67
  -3  -3   013162.21  231.43
  -3   3  -1 1661.32  106.06
   3   3   1 1731.12  107.31
   3   3   1 1897.75  140.65
  -3   3  -1 1479.12   85.67
   3  -3   1 1575.47  105.12
   3  -3   1 1622.80   93.22
  -3  -3  -1 1575.89   94.57
  -3  -3  -1 1494.34   89.27
  -3   3  -223854.52  431.77
   3   3   222217.49  394.67
  -3   3  -223152.09  389.82
   3   3   222379.96  385.32
   3  -3   223547.90  396.19
  -3  -3  -223547.26  403.25
  -3   3  -318378.34  509.45
  -3   3  -319065.06  555.22
   3   3   319266.78  558.49
  -3  -3  -319828.09  562.87
   3  -3   320535.20  606.23
  -3  -3  -319366.51  543.82
   3  -3   319462.50  539.99
  -3   3  -4 4081.20  120.52
  -3   3  -4 4303.97  152.20
   3   3   4 4242.36  154.38
  -3   3  -4 4255.35  120.78
  -3  -3  -4 4330.23  139.47
  -3  -3  -4 3918.08  120.53
   3  -3   4 4724.77  188.24
  -3   3  -5 2466.35   89.73
  -3   3  -5 2378.65  108.32
   3   3   5 2306.20  121.13
  -3   3  -5 2538.49   89.69
  -3  -3  -5 2163.67   95.08
  -3  -3  -5 2185.05   86.57
   3  -3   5 2865.94  294.65
  -3   3  -6 2622.28  184.96
   3   3   6 2524.98  278.39
  -3   3  -6 2631.94  202.46
  -3   3  -6 2629.14  183.87
   3  -3   6 2384.43  190.91
  -3  -3  -6 2491.77  181.35
  -3  -3  -6 2607.87  188.40
  -3  -3  -6 2549.48  188.35
  -3   3  -7  497.77   80.25
   3   3   7  617.66  133.43
  -3   3  -7  488.49   90.97
  -3  -3  -7  330.90   95.39
   3  -3   7  521.07   90.16
  -3  -3  -7  424.32  124.86
  -3  -3  -7  469.08  119.01
   3   3   8 1501.02  276.81
  -3   3  -8 1476.74  167.39
  -3   3  -8 1587.14  179.47
   3  -3   8 1327.31  283.60
  -3  -3  -8 1542.20  189.70
   3   3   9 3692.10  356.94
  -3   3  -9 3593.22  225.81
  -3   3  -9 3789.17  230.60
  -3  -3  -9 3133.41  242.93
  -3   3 -10 1122.85  164.85
  -3   3 -10  801.55  141.64
  -3  -3 -10  950.72  144.08
  -3   3 -11  300.67   94.59
  -3  -3 -11  380.79   99.93
   3   5 -12   86.74   34.16
   3   5 -11  -29.73   36.74
   3   5 -10 1975.61  168.68
  -3  -5  10 2405.15  162.48
   3   5  -9   62.33   25.19
   3  -5  -9    9.85   21.65
  -3  -5   9   75.53   42.51
  -3   5   8   42.39   32.74
   3   5  -8  133.13   49.74
   3  -5  -8   25.25   20.71
  -3  -5   8  128.80   52.98
   3  -5  -8   80.47   36.86
   3   5  -7  232.81   72.17
  -3   5   7  355.85   99.42
   3   5  -7  162.16   54.25
   3   5  -7  391.44  108.92
  -3  -5   7  280.45   72.22
   3  -5  -7  163.97   47.43
   3  -5  -7  330.17   82.30
  -3   5   6 3805.19  180.70
   3   5  -6 3792.15  170.74
   3   5  -6 3719.23  165.81
   3  -5  -6 4227.71  177.60
   3  -5  -6 3964.67  201.80
   3  -5  -6 4117.86  187.03
  -3  -5   6 4195.27  189.24
  -3  -5   6 3808.10  166.18
  -3   5   5   82.53   38.65
   3   5  -5   14.64   22.95
   3   5  -5   40.34   20.26
   3  -5  -5   20.58    7.14
   3  -5  -5   64.62   26.79
  -3  -5   5    7.33   19.62
   3  -5  -5   62.09   31.03
  -3  -5   5   53.43   22.98
  -3   5   4 2394.63  177.82
   3   5  -4 2510.91   86.26
   3   5  -4 2208.24  160.29
   3  -5  -4 2284.63  159.53
   3  -5  -4 2421.82  110.28
   3  -5  -4 2330.42  169.92
  -3  -5   4 2377.90   90.34
  -3  -5   4 2148.30  157.50
  -3   5   3 1038.29   76.84
  -3   5   3 1063.60   60.63
   3   5  -3 1203.43   76.03
   3   5  -3 1211.24   87.45
   3  -5  -3 1024.84   59.63
  -3  -5   3 1131.28   76.80
  -3  -5   3 1104.32   73.67
   3  -5  -3  870.43  114.74
  -3   5   2  431.65   47.28
  -3   5   2  399.35   38.29
   3   5  -2  415.30   68.11
   3   5  -2  330.25   51.80
   3  -5  -2  256.37   22.79
   3  -5  -2  295.63   33.42
  -3  -5   2  478.92   81.24
  -3  -5   2  295.87   24.77
   3   5  -1  315.24   38.20
  -3   5   1  211.09   22.52
   3   5  -1  297.61   32.99
  -3   5   1  201.83   31.00
   3  -5  -1  248.02   31.74
  -3  -5   1  258.85   42.92
   3  -5  -1  264.64   27.82
  -3  -5   1  347.22   54.83
   3   5   0 6787.60  130.47
   3   5   0 7217.29  138.46
  -3   5   0 6946.43  131.83
   3  -5   0 6499.31  123.52
   3  -5   0 6377.76  137.74
  -3  -5   0 7092.95  136.63
  -3   5  -1 1230.41   93.20
  -3   5  -1 1102.45   75.49
   3   5   1 1119.07   70.94
   3   5   1 1218.98  103.12
   3  -5   1 1007.55   82.23
   3  -5   1 1125.86   67.16
  -3  -5  -1 1211.56   91.74
  -3  -5  -1 1126.72   71.66
  -3   5  -2  118.58   12.24
  -3   5  -2  181.74   32.97
   3   5   2  238.34   39.44
   3   5   2  162.35   24.61
  -3  -5  -2  157.32   20.53
   3  -5   2  144.53   19.99
   3  -5   2  349.52   71.23
  -3  -5  -2  184.37   28.92
  -3   5  -3   93.70   10.05
  -3   5  -3  158.43   34.92
   3   5   3   73.31   24.04
   3   5   3   92.34   26.95
  -3  -5  -3   91.30   19.57
  -3  -5  -3   68.81   26.47
   3  -5   3  141.12   40.36
  -3   5  -4 1297.86   91.25
   3   5   4 1317.24  109.55
  -3   5  -4 1154.07   97.02
  -3   5  -4 1154.72   80.60
   3  -5   4 1399.44  248.66
  -3  -5  -4 1440.86  113.22
  -3  -5  -4 1121.73   89.17
  -3   5  -5   43.55   13.18
  -3   5  -5   24.06   18.44
   3   5   5   -2.50   27.67
  -3   5  -5   50.50   15.04
  -3  -5  -5    9.58   15.33
  -3  -5  -5   23.48   21.54
   3  -5   5  106.80   56.70
  -3   5  -610769.54  422.07
   3   5   6 8891.82  382.42
  -3   5  -610710.70  418.80
  -3  -5  -611057.49  449.80
   3  -5   610077.29  447.37
  -3  -5  -6 9414.06  380.63
  -3  -5  -610123.61  406.74
   3   5   7  520.99  108.45
  -3   5  -7  389.34   96.34
  -3   5  -7  352.87   88.97
   3  -5   7  722.82  126.47
  -3  -5  -7  299.23   91.98
  -3  -5  -7  555.96   78.19
  -3  -5  -7  464.54  114.69
   3   5   8 1045.07  182.64
  -3   5  -8  733.27  105.93
  -3   5  -8  761.12  108.45
   3   5   9  188.90   69.49
  -3   5  -9  169.60   46.40
  -3   5  -9   82.36   33.24
  -3  -5  -9   98.74   37.05
   3   5  10  161.81   66.18
  -3   5 -10  261.69   70.96
  -3  -5 -10  256.16   57.44
  -3   5 -11  110.73   56.48
  -3  -5 -11   46.54   20.20
   3   7 -12   72.38   43.36
   3   7 -11 5256.71  390.36
   3   7 -10  387.27  116.52
  -3  -7  10  415.85  133.69
   3   7  -9 1336.60  188.42
   3  -7  -9 1379.42  161.10
  -3  -7   9 1051.73  196.12
   3   7  -8 1421.72  206.93
   3   7  -8 1113.10  191.69
   3  -7  -8 1478.54  167.42
  -3  -7   8 1899.72  221.95
   3   7  -7 2604.31  233.10
   3   7  -7 2499.00  190.88
  -3   7   7 2598.85  309.50
   3  -7  -7 2991.83  163.87
  -3  -7   7 2225.19  175.15
   3  -7  -7 2641.11  198.09
  -3   7   6 1218.41  215.41
   3   7  -6 1071.19  103.11
   3   7  -6 1326.93  126.08
  -3  -7   6 1263.52   95.88
   3  -7  -6 1208.56  130.66
  -3  -7   6 1177.05   98.52
   3  -7  -6 1425.47   99.85
   3   7  -524597.74  783.96
  -3   7   526017.09  835.47
   3   7  -523988.72  760.80
   3  -7  -524297.25  759.84
  -3  -7   525443.04  809.52
  -3  -7   526687.44  850.19
   3   7  -4 6617.90  192.38
   3   7  -4 7029.03  200.84
  -3   7   4 6851.89  209.41
   3  -7  -4 6911.69  204.81
  -3  -7   4 6460.29  189.36
  -3  -7   4 6803.61  199.56
   3   7  -3 3566.25  116.29
   3   7  -3 3642.41  114.72
  -3   7   3 3386.99  161.86
   3  -7  -3 3209.44  109.21
  -3  -7   3 2940.73  111.69
  -3  -7   3 3366.39  108.66
  -3   7   2   61.78   18.77
  -3   7   2   48.24   10.08
   3   7  -2   82.61   34.16
   3   7  -2   22.89   15.74
  -3  -7   2   48.95   27.17
   3  -7  -2   56.81   23.07
   3  -7  -2   48.64   17.18
  -3  -7   2   57.02   32.23
  -3   7   111619.76  215.90
  -3   7   112503.68  228.75
   3   7  -111355.70  205.85
   3   7  -111518.33  207.53
   3  -7  -112041.45  229.48
   3  -7  -110680.86  196.52
  -3  -7   111882.30  217.63
  -3  -7   111453.43  208.24
  -3   7   0 4551.21  105.74
  -3   7   0 5025.55  103.78
   3  -7   0 4585.79  123.02
  -3  -7   0 4819.63   97.34
   3  -7   0 4528.93   94.40
  -3  -7   0 4736.24   98.94
  -3   7  -136960.77  622.31
  -3   7  -135178.60  614.29
   3   7   137193.10  634.46
   3   7   138016.60  646.16
   3  -7   138025.15  677.68
   3  -7   135563.35  597.56
  -3  -7  -137430.54  636.99
  -3  -7  -136121.46  613.47
  -3   7  -2 6615.12  155.55
  -3   7  -2 7343.76  127.70
   3  -7   2 7224.14  232.12
  -3  -7  -2 7374.76  143.49
   3  -7   2 7595.26  129.92
  -3  -7  -2 7092.97  141.40
   3   7   3 2650.59  100.45
  -3   7  -3 2692.53  113.45
   3   7   3 2655.58   89.97
   3  -7   3 2861.94  147.88
  -3  -7  -3 3061.26  108.06
  -3  -7  -3 2939.03   97.84
  -3   7  -4 9000.04  272.31
   3  -7   4 9438.20  314.58
  -3  -7  -4 9478.75  266.37
  -3  -7  -4 9905.58  281.62
  -3   7  -5 7020.44  282.97
   3   7   5 6952.67  361.52
  -3   7  -5 5717.40  387.66
  -3   7  -5 6392.29  257.16
   3  -7   5 6086.57  287.27
  -3  -7  -5 8010.56  337.90
  -3  -7  -5 6297.46  272.30
  -3   7  -6 2285.80  157.41
   3   7   6 1897.17  157.65
  -3   7  -6 2351.74  162.70
  -3  -7  -6 2656.14  194.21
   3  -7   6 2617.08  349.97
  -3  -7  -6 2248.32  220.95
   3   7   720134.94 4699.73
  -3   7  -720024.17 4667.33
  -3   7  -719906.40 4639.70
  -3  -7  -719072.57  657.79
   3   7   8  732.51  164.18
  -3   7  -8  585.25  172.91
  -3   7  -8  634.86  158.51
  -3   7  -8  656.22  164.75
  -3  -7  -8  593.20  180.25
   3   7   9   24.68   44.84
  -3   7  -9  139.51   62.78
  -3   7  -9    5.24    6.22
  -3  -7  -9  151.25   53.93
   3   7  10  335.39  138.52
  -3   7 -10  436.96  108.01
  -3   7 -11 2265.82  365.29
  -3  -7 -11 2010.93  326.15
  -3  -7 -11 2120.46  340.94
   3   9 -12   36.25   28.60
   3   9 -11 5057.75  380.79
   3   9 -10  163.09   50.66
  -3  -9  10   16.41   18.09
   3   9  -9 2263.58  299.86
   3  -9  -9 2721.34  178.53
  -3  -9   9 2797.32  210.70
   3   9  -8 3355.43  203.01
   3   9  -8 3937.59  241.01
   3  -9  -8 4333.15  244.67
  -3  -9   8 4064.97  247.48
   3  -9  -8 4503.72  255.94
   3   9  -7 4049.24  153.69
   3   9  -7 3994.99  158.20
   3  -9  -7 3828.53  131.15
  -3  -9   7 4205.46  188.85
   3  -9  -7 4713.68  162.97
   3   9  -6  462.76   91.14
  -3   9   6  427.51  114.76
   3   9  -6  332.02   68.37
  -3  -9   6  505.39  116.26
  -3  -9   6  548.40  122.63
   3   9  -521352.21  685.32
   3   9  -521803.97  692.83
  -3   9   521194.44  686.91
   3  -9  -520260.17  654.65
  -3  -9   520751.06  664.12
  -3  -9   520923.77  671.59
   3   9  -4  203.88   43.04
   3   9  -4  111.73   27.07
  -3   9   4   78.86   30.21
   3  -9  -4   24.49   18.26
  -3  -9   4  153.21   29.59
  -3  -9   4   63.41   21.72
   3   9  -3 5414.11  180.83
   3   9  -3 5706.91  171.14
  -3   9   3 5736.23  186.32
   3  -9  -3 5214.08  165.65
  -3  -9   3 5935.36  182.44
  -3  -9   3 5120.24  158.82
  -3   9   215032.17  419.01
   3   9  -216923.99  479.47
  -3   9   217734.03  507.76
  -3   9   216703.25  462.98
   3   9  -217556.01  493.80
  -3  -9   216720.06  485.70
  -3  -9   214980.14  426.37
   3  -9  -216486.06  469.42
  -3   9   1 4683.53  140.36
  -3   9   1 4024.34   94.20
   3   9  -1 4295.81   94.59
   3   9  -1 4382.79   91.80
   3  -9  -1 4167.90  145.51
   3  -9  -1 4132.55   93.18
  -3  -9   1 4448.18   98.95
  -3  -9   1 3773.56   83.83
  -3   9   0 2065.62  132.17
  -3   9   0 1855.97  143.60
   3   9   0 1830.52  107.42
   3   9   0 1971.55  117.22
  -3  -9   0 1939.29  113.58
   3  -9   0 2143.57  226.05
  -3  -9   0 1805.43  112.22
   3  -9   0 1966.41  116.07
   3   9   139489.60  673.30
   3   9   139450.20  672.94
  -3   9  -138174.84  645.08
   3  -9   136640.89  659.38
   3  -9   137148.34  626.11
  -3  -9  -137893.51  647.70
  -3  -9  -137359.37  634.01
   3   9   2  106.16   16.42
  -3   9  -2   54.05   43.11
   3   9   2  120.76   35.37
   3  -9   2  119.54   59.25
   3  -9   2  156.26   21.79
  -3  -9  -2   99.34   18.59
  -3  -9  -2  128.13   37.64
   3   9   3 2072.25   78.60
  -3   9  -3 1676.47  134.40
   3   9   3 1754.39  173.53
   3  -9   3 2558.54  307.45
  -3  -9  -3 2027.04   79.43
  -3  -9  -3 2072.85   72.79
   3   9   4 4616.64  171.26
  -3   9  -4 4476.00  178.16
   3  -9   4 4656.56  304.73
  -3  -9  -4 5041.86  171.14
  -3  -9  -4 5353.60  192.39
   3   9   5 1565.84   96.73
   3  -9   5 1495.04  325.06
  -3  -9  -5 1661.61   84.83
  -3  -9  -5 1364.55  158.85
   3   9   6  772.63   85.79
  -3  -9  -6 1003.94   92.89
   3   9   7 7254.28  348.75
  -3   9  -7 7664.69  358.76
  -3  -9  -7 7119.16  321.98
  -3  -9  -7 8048.84  406.47
   3   9   8   73.81   45.81
  -3   9  -8  118.29   59.10
  -3   9  -8    2.71    4.90
  -3   9  -8    1.43    3.76
  -3  -9  -8   29.67   31.19
   3   9   9   96.05   54.28
  -3   9  -9  149.26   55.01
  -3  -9  -9   81.67   45.66
   3   9  10  967.40  269.67
  -3   9 -10 1322.38  221.58
  -3  -9 -10 1341.73  223.57
  -3   9 -11  695.80  161.84
  -3  -9 -11  319.77  120.94
   3  11 -11   11.61   22.92
   3  11 -10  267.13   77.48
  -3 -11  10  134.57   49.39
   3  11  -9  467.57  121.83
  -3 -11   9  428.66   95.66
   3  11  -8 3717.36  231.54
   3  11  -8 3429.69  203.19
  -3 -11   8 3725.10  230.90
   3  11  -7  364.81   98.43
   3  11  -7  218.55   68.30
  -3 -11   7  360.43   87.55
   3  11  -6 3162.35  181.39
   3  11  -6 3488.31  187.26
  -3 -11   6 3433.59  190.08
   3  11  -5 2696.66  129.99
   3  11  -5 2632.12  141.32
  -3 -11   5 2333.69  112.26
  -3 -11   5 2195.20  107.53
   3  11  -4  413.85   50.59
   3  11  -4  406.24   64.34
  -3  11   4  512.22   73.32
   3 -11  -4  422.38   52.16
  -3 -11   4  514.53   90.10
  -3 -11   4  361.02   78.36
   3  11  -3 1396.77  108.50
   3  11  -3 1485.61  108.93
  -3  11   3 1370.14  110.09
   3 -11  -3 1546.45  119.04
  -3 -11   3 1520.44  114.08
  -3 -11   3 1350.67  139.18
  -3  11   2 3819.58  117.39
  -3  11   2 4065.54  190.52
   3  11  -2 4208.79  138.58
  -3  11   2 4073.02  118.74
   3  11  -2 4057.99  125.28
   3 -11  -2 4165.76  138.09
  -3 -11   2 4323.48  137.75
  -3 -11   2 4104.68  131.42
  -3  11   1 5393.62  167.16
   3  11  -1 6302.74  194.70
  -3  11   1 6352.67  184.73
  -3  11   1 6046.38  188.78
   3  11  -1 6125.38  182.85
  -3 -11   1 6155.14  190.86
   3 -11  -1 6326.14  194.81
  -3 -11   1 6074.03  183.68
  -3  11   0  -17.03   27.22
   3  11   0    3.63   20.69
   3  11   0   43.26   20.95
  -3 -11   0   18.98   16.07
  -3 -11   0   20.82   15.81
   3 -11   0   21.53   19.06
   3  11   1 3152.46  104.18
  -3  11  -1 3298.54  134.79
   3  11   1 2755.75   93.39
  -3 -11  -1 2725.43   88.51
   3 -11   1 2843.56  261.77
  -3 -11  -1 2759.48  126.03
   3 -11   1 2548.55   81.30
  -3  11  -2 9516.37  385.44
   3  11   2 7829.64  232.95
   3  11   2 7730.43  228.43
  -3 -11  -2 8071.39  234.33
   3 -11   2 8144.57  229.60
   3 -11   2 7162.08  277.14
  -3 -11  -2 7820.22  234.78
   3 -11   2 8206.33  230.98
   3  11   3 2462.05  100.20
  -3  11  -3 2389.56  128.67
   3  11   3 1966.48  173.40
   3 -11   3 2023.87  194.40
  -3 -11  -3 2022.17   82.84
  -3 -11  -3 2261.85   81.49
  -3  11  -4 1901.98  113.43
   3  11   4 2411.55  102.27
  -3 -11  -4 2611.49   98.84
  -3 -11  -4 2331.61  100.94
   3  11   5  473.14  118.68
  -3  11  -5  537.31  126.41
  -3 -11  -5  539.93  123.64
  -3 -11  -5  463.74   72.58
   3  11   6 1284.78  126.61
  -3  11  -6 1422.48  130.40
  -3 -11  -6 1369.75  107.86
  -3 -11  -6 1554.15  127.33
   3  11   7   21.46   35.09
  -3  11  -7   42.13   40.88
  -3 -11  -7   30.20   18.78
  -3 -11  -7   70.08   46.08
   3  11   8  747.66  154.43
  -3  11  -8  530.15  102.31
  -3 -11  -8  394.72  107.71
   3  11   9 1112.03  203.79
  -3  11  -9 1397.09   82.17
  -3 -11  -9 1558.69   93.34
  -3  11 -10  490.85  112.23
  -3 -11 -10  286.78  114.79
  -3  11 -11  126.91   52.12
  -3 -11 -11  165.12   70.63
   3  13 -11  130.69   58.13
   3  13 -10   88.34   40.09
  -3 -13  10   42.26   35.60
   3  13  -9 4235.24  268.19
  -3 -13   9 4036.45  258.21
   3  13  -8 2049.30  292.52
  -3 -13   8 1596.50  176.43
   3  13  -711519.99  523.40
   3  13  -711660.25  516.56
  -3 -13   712141.86  543.03
   3  13  -6 1605.38  131.47
   3  13  -6 1693.71  132.11
  -3 -13   6 1758.51  144.19
   3  13  -5  572.63  146.87
   3  13  -5  390.01   71.67
  -3 -13   5  399.26   60.23
   3  13  -4  440.38   67.06
   3  13  -4  286.71   35.17
  -3 -13   4  273.23   66.81
  -3 -13   4  350.37   62.41
   3 -13  -4  383.72   51.34
  -3  13   2 7963.93  225.16
   3  13  -2 9221.67  263.87
  -3  13   2 9243.79  252.84
   3  13  -2 8855.64  250.93
  -3 -13   2 9737.94  276.07
   3 -13  -2 9005.05  263.34
  -3  13   122820.92  654.88
   3  13  -120639.61  584.41
   3  13  -122301.18  626.72
  -3  13   122295.36  622.85
   3 -13  -121758.06  616.85
  -3 -13   120871.24  589.01
  -3 -13   121132.34  599.22
  -3  13   0  190.15   46.12
   3  13   0  313.98   57.24
   3  13   0  196.62   28.76
  -3  13   0  226.38   33.60
   3 -13   0  233.59   31.54
  -3 -13   0  168.44   36.20
  -3 -13   0  344.70   55.72
  -3  13  -1 2815.30  249.40
   3  13   1 2853.65  103.79
   3  13   1 2571.11  151.82
  -3  13  -1 2541.81   88.86
   3 -13   1 2444.40   81.92
  -3 -13  -1 2388.48  111.78
  -3 -13  -1 2292.02  167.05
   3 -13   1 2696.25   92.43
  -3  13  -2  721.93   89.91
   3  13   2  729.60   62.86
  -3  13  -2  986.87  139.83
   3  13   2  758.21   86.60
  -3 -13  -2  725.93   58.20
   3 -13   2  746.40   55.72
  -3 -13  -2  909.47  103.26
   3 -13   2  837.87   62.29
  -3  13  -310622.40  380.40
   3  13   312098.24  397.07
  -3  13  -3 9742.44  321.82
   3  13   3 9812.95  325.02
  -3 -13  -310019.53  323.50
  -3 -13  -3 9983.37  333.63
   3  13   4 2807.57  136.74
  -3  13  -4 2331.16  117.42
  -3 -13  -4 2459.99  127.49
  -3 -13  -4 2533.29  127.46
   3  13   5 8506.92  351.20
  -3  13  -5 9989.04  406.95
  -3 -13  -5 9749.06  391.47
  -3 -13  -5 9227.09  378.82
   3  13   6 1081.71  177.22
  -3  13  -6 1105.27  157.92
  -3 -13  -6  890.23  121.14
  -3 -13  -6  980.34  116.08
   3  13   7  314.45   78.18
  -3  13  -7  494.01   89.77
  -3 -13  -7  295.68   55.97
  -3 -13  -7  404.31   79.21
   3  13   8   65.65   50.92
  -3  13  -8  205.31   61.31
  -3 -13  -8  144.68   50.89
   3  13   9 7579.86  847.10
  -3  13  -9 7925.57  874.42
  -3 -13  -9 6924.37  388.76
   3  13  10  171.01   80.61
  -3  13 -10  412.07  150.01
  -3 -13 -10  382.56  130.36
  -3  13 -11  612.71  273.36
  -3 -13 -11  623.47  198.23
   3  15 -11  784.17  208.58
   3 -15 -11  728.72  273.58
   3  15 -10  819.95  158.61
   3  15  -9 1846.84  266.10
  -3 -15   9 1895.77  135.49
   3  15  -8 3381.53  265.83
  -3 -15   8 3412.28  232.67
   3  15  -7 1424.51  217.06
   3  15  -7  762.32  134.97
  -3 -15   7 1280.61  178.61
   3  15  -6 1232.48  107.07
   3  15  -6  840.45   93.15
  -3 -15   6 1000.77  123.01
   3  15  -5 7107.69  297.35
   3  15  -5 6726.20  271.64
  -3 -15   5 6648.77  276.70
   3  15  -4   44.34   23.69
   3  15  -4   16.02   24.58
  -3 -15   4   48.72   22.13
  -3  15   3 1513.40   58.51
  -3  15   3 1608.87   55.26
   3  15  -3 1853.32   93.63
   3  15  -3 1766.70   81.04
  -3 -15   3 1564.82  133.45
  -3 -15   3 1721.51   83.56
   3 -15  -3 1904.67   88.70
  -3  15   2 7581.35  278.37
   3  15  -2 7256.88  246.72
  -3  15   2 7172.40  232.37
   3  15  -2 7493.01  247.85
  -3 -15   2 7085.60  238.68
  -3 -15   2 7749.79  261.22
   3 -15  -2 6977.12  243.19
  -3  15   1 4324.47  203.52
   3  15  -1 3687.31  120.97
   3  15  -1 4233.39  157.36
  -3  15   1 4153.04  123.70
   3 -15  -1 3913.89  127.65
  -3 -15   1 3617.15  119.30
  -3 -15   1 3810.58  121.22
  -3  15   0 3375.28  307.44
   3  15   0 3068.89  105.83
   3  15   0 2910.84   98.71
  -3  15   0 2822.22   95.44
   3 -15   0 2847.65  152.74
  -3 -15   0 3215.34  163.33
  -3 -15   0 2989.52   98.45
  -3  15  -1 5650.05  279.73
   3  15   1 5798.61  177.48
   3  15   1 5648.95  169.91
  -3  15  -1 6193.90  195.52
   3 -15   1 5848.56  170.30
  -3 -15  -1 5475.16  173.79
  -3 -15  -1 5966.94  173.34
   3 -15   1 5948.86  173.09
  -3  15  -2  393.27   61.95
   3  15   2  529.88   80.73
  -3  15  -2  540.34   60.52
   3  15   2  596.04   65.42
  -3 -15  -2  302.50   42.97
   3 -15   2  414.51   41.86
  -3 -15  -2  294.66   54.40
   3 -15   2  448.09   45.13
  -3  15  -3 6861.95  327.42
   3  15   3 6665.82  280.97
  -3  15  -3 7490.24  342.54
   3  15   3 7264.01  365.41
  -3 -15  -3 6959.29  287.70
   3 -15   3 6890.64  281.07
  -3 -15  -3 6812.59  298.04
   3 -15   3 6941.57  280.48
   3  15   4 8811.44  361.22
  -3  15  -4 7822.52  321.41
  -3 -15  -4 7817.01  311.83
  -3 -15  -4 8411.01  347.71
   3  15   5 5657.53  302.94
  -3  15  -5 4988.23  272.55
  -3 -15  -5 6416.61  332.05
  -3 -15  -5 6752.02  378.88
   3  15   6 1020.64  142.57
  -3  15  -6 1258.30  224.66
  -3 -15  -6  834.57  147.45
  -3 -15  -6 1035.43  140.03
   3  15   7 3137.21  207.28
  -3  15  -7 3278.55  213.97
  -3 -15  -7 3241.09  207.04
   3  15   8  206.17   77.87
  -3  15  -8  320.10   75.46
  -3 -15  -8  231.04   62.46
   3  15   9 1131.61  201.72
  -3  15  -9  984.12  168.53
  -3 -15  -9 1325.95  197.68
  -3  15 -10 1418.29  314.39
  -3 -15 -10 1284.07  443.71
  -3  15 -11 1346.95  273.06
  -3 -15 -11  720.68  291.42
   3  17 -11 1510.28  259.08
   3 -17 -11 1501.18  266.57
   3  17 -10 1275.36  302.90
   3 -17 -10 1599.55  235.07
   3  17  -9   58.47   43.22
  -3 -17   9  175.69   59.34
   3  17  -8 7240.48  442.54
  -3 -17   8 6859.01  417.13
   3  17  -7  503.75  129.56
  -3 -17   7  335.99   98.46
   3  17  -6 2242.46  236.44
   3  17  -6 1837.63   95.25
  -3 -17   6 1927.83  104.02
   3  17  -5 3717.79  266.33
   3  17  -5 3191.67  205.30
  -3 -17   5 3496.63  194.03
   3  17  -4 4940.67  213.12
   3  17  -4 4484.67  225.84
  -3 -17   4 4388.14  186.33
  -3  17   3   64.89   25.50
  -3  17   3   85.17   19.13
   3  17  -3  102.71   36.48
   3 -17  -3   47.89   27.79
  -3 -17   3   51.35   31.23
  -3  17   2 6926.75  275.16
   3  17  -2 6826.22  233.95
  -3  17   2 7402.62  241.16
   3  17  -2 6970.70  234.21
  -3 -17   2 6359.62  217.71
  -3 -17   2 7583.95  259.25
   3 -17  -2 6359.41  234.48
  -3  17   1  292.90   65.88
   3  17  -1  415.17   46.95
   3  17  -1  413.75   47.64
  -3  17   1  493.43   74.23
   3 -17  -1  396.40   52.70
  -3 -17   1  452.36   58.70
  -3 -17   1  431.32   50.14
  -3  17   0 5571.26  292.66
   3  17   0 5857.45  212.08
   3  17   0 5996.00  206.02
  -3  17   0 6201.88  209.93
   3 -17   0 5639.51  210.27
  -3 -17   0 6189.19  270.82
  -3 -17   0 5540.61  190.07
   3 -17   0 6220.33  210.82
  -3  17  -1 5752.31  398.42
   3  17   1 5523.22  193.96
   3  17   1 5097.24  177.68
  -3  17  -1 5589.90  197.75
   3 -17   1 5270.49  183.63
  -3 -17  -1 5523.56  243.82
  -3 -17  -1 5320.06  181.21
   3 -17   1 5518.44  189.31
  -3  17  -2 2901.84  376.85
   3  17   2 3669.98  163.17
  -3  17  -2 3285.46  149.97
   3  17   2 3244.61  148.86
  -3 -17  -2 3455.07  150.19
   3 -17   2 3488.88  150.91
  -3 -17  -2 3873.63  248.29
   3 -17   2 3600.84  153.40
   3  17   3 1824.69  137.32
  -3  17  -3 1891.04  151.98
  -3 -17  -3 1527.86  111.51
   3 -17   3 1567.56  111.09
   3 -17   3 1813.45  142.23
  -3 -17  -3 2063.53  225.26
   3  17   4 8951.91  466.49
  -3  17  -4 8044.43  422.37
  -3 -17  -4 7672.68  396.25
  -3 -17  -4 8274.71  434.48
   3  17   5   82.30   43.80
  -3  17  -5  112.03   54.32
  -3 -17  -5   86.27   28.71
  -3 -17  -5   51.72   30.12
   3  17   6 1192.47  156.04
  -3  17  -6 1464.89  202.82
  -3 -17  -6  825.67  119.34
  -3 -17  -6 1478.97  227.93
   3  17   7  265.68   79.44
  -3  17  -7  444.62   93.20
  -3 -17  -7  379.67   93.53
   3  17   8  355.77  109.35
  -3  17  -8  275.52   77.76
  -3 -17  -8  362.82   95.30
   3  17   9  436.65  121.40
  -3  17  -9  705.70  234.46
  -3 -17  -9  704.44  209.51
  -3  17 -10 1099.61  252.40
  -3 -17 -10 1090.52  262.55
   3  19 -10 1236.98  285.33
   3 -19 -10 1589.39  265.00
   3  19  -9  315.58  110.61
   3 -19  -9  553.30  193.33
   3  19  -8  455.95  115.26
   3  19  -7  -23.12   37.27
  -3 -19   7   68.31   37.83
   3  19  -6 2884.62  250.29
   3  19  -6 2688.41  579.72
  -3 -19   6 3254.13  202.38
   3  19  -5 5233.91  205.53
   3  19  -5 4831.22  177.15
  -3 -19   5 5171.52  197.64
   3  19  -4 5570.04  299.84
   3  19  -4 5056.02  265.33
  -3 -19   4 5273.66  279.66
  -3  19   3  505.78  115.18
  -3  19   3  639.71   52.51
   3  19  -3  615.83   83.51
   3  19  -3  507.94  121.37
  -3 -19   3  660.81   67.87
  -3  19   2  149.05   31.70
   3  19  -2  246.82   48.40
  -3  19   2  336.73   56.19
   3  19  -2  244.54   42.29
  -3 -19   2  300.96   54.89
   3 -19  -2   62.67   24.55
   3 -19  -2  291.08   53.52
  -3  19   1  284.01   69.87
   3  19  -1  341.55   50.74
  -3  19   1  562.61   90.86
   3  19  -1  317.00   65.24
  -3 -19   1  371.39   75.54
  -3 -19   1  554.27   87.01
   3 -19  -1  455.87   74.23
   3 -19  -1  395.70   71.95
  -3  19   0 6937.89  390.51
   3  19   0 7137.32  301.31
   3  19   0 6874.78  290.45
  -3  19   0 7274.11  305.09
   3 -19   0 6460.63  324.33
  -3 -19   0 6680.24  291.05
  -3 -19   0 6864.92  289.43
   3 -19   0 7290.71  305.83
  -3  19  -1 1738.39  289.70
   3  19   1 2399.53  116.60
  -3  19  -1 2376.41  144.77
  -3 -19  -1 2115.89   99.43
   3 -19   1 2164.42  142.69
  -3 -19  -1 2478.40  179.66
   3 -19   1 2366.93  109.59
  -3  19  -2 3492.57  401.44
   3  19   2 5023.77  211.92
  -3  19  -2 4700.50  211.58
  -3 -19  -2 4706.37  195.12
   3 -19   2 4801.65  233.65
  -3 -19  -2 4822.41  211.59
   3 -19   2 5180.47  210.18
   3  19   3  298.12   77.49
  -3  19  -3  322.32   90.75
  -3 -19  -3  195.41   60.09
   3 -19   3  222.40   51.41
   3 -19   3  198.71   45.87
  -3 -19  -3  299.21   78.71
   3  19   4  390.29   90.93
  -3  19  -4  422.06  103.34
  -3 -19  -4  199.07   59.51
  -3 -19  -4  515.10   74.92
   3  19   5  177.76   64.31
  -3  19  -5  125.83   56.22
  -3 -19  -5   68.01   24.13
  -3 -19  -5  132.66   61.36
   3  19   6 4078.56  249.22
  -3  19  -6 3946.77  258.59
  -3 -19  -6 4813.38  297.53
   3  19   7 2181.30  167.26
  -3  19  -7 2507.16  217.08
  -3 -19  -7 2387.19  168.03
   3  19   8 1977.61  154.05
  -3  19  -8 1635.87  386.95
  -3 -19  -8 2470.39  189.33
  -3  19  -9   65.06   68.16
  -3 -19  -9   -1.84   37.32
  -3  19 -10  163.16   73.77
   3  21 -10  945.34  300.58
   3 -21 -10  977.88  304.93
   3  21  -9 1266.97  260.82
   3 -21  -9 1090.62  289.55
   3  21  -8   66.98   58.24
  -3 -21   8   12.48   26.81
   3 -21  -8  231.49   74.17
   3  21  -7 3956.81  253.84
  -3 -21   7 3404.40  235.05
   3 -21  -7 4277.99  274.79
   3  21  -6 1840.67  249.99
   3  21  -6  560.63  203.88
  -3 -21   6 1706.89  186.19
   3 -21  -6 1941.76  306.89
   3  21  -5  769.97  134.32
   3  21  -5  791.16  174.96
  -3 -21   5  713.96  147.37
   3 -21  -5  851.44  112.02
  -3  21   4 2184.45  167.95
  -3 -21   4 3454.44  140.40
   3 -21  -4 3690.14  216.65
  -3  21   3 2311.58  291.22
  -3  21   3 3115.13  163.67
   3  21  -3 3589.70  247.19
   3  21  -3 2946.33  161.06
  -3 -21   3 3468.72  193.60
   3 -21  -3 3369.89  191.25
  -3  21   2  218.30   60.76
   3  21  -2  575.72   80.43
  -3  21   2  554.02   71.73
   3  21  -2  341.08   83.66
  -3 -21   2  475.09   60.45
   3 -21  -2  484.91   67.62
   3  21  -1 4062.77  199.26
  -3  21   1 4489.61  188.43
   3 -21  -1 3791.54  231.07
  -3 -21   1 4436.09  262.92
   3 -21  -1 4228.76  182.75
  -3  21   0 3921.49  317.77
   3  21   0 4655.64  200.71
  -3  21   0 4789.04  206.15
   3 -21   0 4173.99  244.49
  -3 -21   0 4475.37  199.96
   3 -21   0 4519.18  191.60
  -3  21  -1  187.22   55.19
   3  21   1   51.47   16.23
  -3  21  -1   16.02   25.84
  -3 -21  -1   30.23   14.87
   3 -21   1   -6.45   15.78
  -3 -21  -1  -13.08   22.12
   3 -21   1   29.10   19.04
   3  21   2 2681.85  207.64
  -3  21  -2 2462.55  216.56
  -3 -21  -2 2382.47  180.73
   3 -21   2 2376.20  232.90
  -3 -21  -2 3027.84  294.39
   3 -21   2 3001.16  161.42
   3  21   3 4944.68  187.33
  -3  21  -3 4507.47  176.41
  -3 -21  -3 4411.72  163.02
   3 -21   3 4685.88  169.86
   3 -21   3 3996.14  157.09
  -3 -21  -3 5055.68  221.77
   3  21   4  438.23   65.26
  -3  21  -4  513.81   88.66
  -3 -21  -4  241.16   66.69
   3 -21   4  407.16   51.37
   3 -21   4  413.54   60.90
  -3 -21  -4  675.86  106.97
   3  21   5 2507.07  543.10
  -3  21  -5 2491.49  322.69
  -3 -21  -5 2610.21  562.53
  -3 -21  -5 3178.23  209.79
   3  21   6 1837.94  182.50
  -3  21  -6 2520.98  314.20
  -3 -21  -6 2729.46  270.04
  -3  21  -7  276.29   75.16
  -3 -21  -7  245.97   72.96
   3  21   8  691.37  169.08
  -3  21  -8  708.96  224.77
  -3 -21  -8 1136.92  199.85
  -3  21  -9  795.52  331.79
  -3 -21  -9 1158.68  269.31
  -3  21 -10  119.19   68.88
   3  23 -10  960.77  238.41
   3 -23 -10  814.15  336.03
   3  23  -9  115.48   49.86
   3 -23  -9  243.21   94.52
   3  23  -8 7081.29  534.71
  -3 -23   8 6431.98  481.49
   3 -23  -8 7195.51  542.68
   3  23  -7   96.88   45.06
  -3 -23   7   16.01   20.90
   3 -23  -7   13.45   31.49
   3  23  -6 2237.89  296.51
  -3 -23   6 1757.14  175.25
   3 -23  -6 1760.56  208.75
   3  23  -5 5537.85  336.89
  -3 -23   5 5087.07  300.67
   3 -23  -5 5482.71  329.44
  -3  23   4  521.72   81.23
  -3  23   4  623.08   87.14
   3  23  -4 1148.54  203.06
  -3 -23   4  866.55  151.71
   3 -23  -4  878.69  154.48
  -3  23   3   38.29   18.60
  -3  23   3   86.56   33.94
   3  23  -3   36.01   39.78
  -3 -23   3   81.05   30.54
   3 -23  -3  160.34   68.61
  -3  23   212895.95  462.83
   3  23  -215949.87  554.23
  -3  23   217039.59  580.44
  -3 -23   214961.57  521.66
   3 -23  -215830.24  551.31
  -3  23   1  119.48   45.32
   3  23  -1  147.72   56.33
  -3  23   1   73.40   29.72
   3 -23  -1   25.82   14.04
  -3 -23   1   87.31   44.59
   3 -23  -1   66.86   35.94
  -3  23   0 3895.31  411.07
   3  23   0 5403.41  288.63
  -3  23   0 5803.64  307.22
   3 -23   0 5071.56  300.92
  -3 -23   0 6147.75  375.32
   3 -23   0 5754.03  304.10
   3  23   110786.35  379.76
  -3  23  -111180.59  395.41
   3 -23   110400.46  366.66
  -3 -23  -111914.00  422.36
   3 -23   112103.67  419.09
   3  23   2 3292.64  140.67
  -3  23  -2 3279.71  205.82
   3 -23   2 2300.85  242.12
  -3 -23  -2 3406.14  148.97
   3 -23   2 3533.86  183.25
   3  23   3  100.69   38.36
  -3  23  -3   49.39   40.60
   3 -23   3   94.59   29.55
   3 -23   3   78.68   26.57
  -3 -23  -3  143.84   55.11
   3  23   4 8851.74  503.56
  -3  23  -411315.60  648.06
  -3 -23  -410453.75  589.94
   3 -23   4 9013.66  503.72
  -3 -23  -412238.05 2630.57
   3  23   5   12.96   16.33
  -3  23  -5  115.94   50.09
  -3 -23  -5   43.88   24.68
  -3 -23  -5  194.61   83.33
   3  23   6 2931.11  195.22
  -3  23  -6 2982.94  318.64
  -3 -23  -6 3133.32  211.79
   3  23   7 3100.33  204.85
  -3  23  -7 2355.43  254.94
  -3 -23  -7 2745.50  222.88
  -3  23  -8 2702.87  221.33
  -3 -23  -8 3009.71  322.81
  -3  23  -9   35.63   53.34
  -3 -23  -9  121.32   54.33
   3  25  -9  265.31  125.12
   3 -25  -9  380.73  122.90
   3  25  -8 2205.24  338.90
   3 -25  -8 2507.40  329.50
   3  25  -7  383.75  111.78
  -3 -25   7  188.02   80.39
   3 -25  -7  276.02   72.14
   3  25  -6  564.35   81.16
  -3 -25   6  504.40  115.45
   3 -25  -6  816.47  117.15
   3  25  -5   67.48   45.16
  -3 -25   5  207.31   49.16
   3 -25  -5  136.14   52.90
  -3  25   4  172.43   58.18
  -3  25   4  322.99   85.22
   3  25  -4  540.52  151.14
  -3 -25   4  605.50  178.73
   3 -25  -4  598.89  172.55
  -3  25   3  319.97  102.51
  -3  25   3  735.58  132.21
   3  25  -3  886.31  160.49
  -3 -25   3  782.78  218.41
   3 -25  -3  701.83  121.97
   3  25  -2 7130.95  329.98
  -3  25   2 7593.99  339.68
  -3 -25   2 6388.88  297.96
   3 -25  -2 7091.35  328.52
  -3  25   1   69.98   40.83
   3  25  -1   84.10   51.93
  -3  25   1   90.65   41.03
  -3 -25   1   39.56   28.67
   3 -25  -1   93.22   47.48
  -3  25   0  -42.09   34.05
   3  25   0   28.48   29.66
  -3  25   0   71.38   44.66
   3 -25   0   -1.45   19.36
  -3 -25   0   65.14   28.35
   3 -25   0   13.17   14.45
   3  25   1  205.69   64.65
  -3  25  -1  249.15   50.05
  -3 -25  -1  118.17   51.85
   3 -25   1  209.40   61.73
   3  25   2  229.60   53.52
  -3  25  -2  201.49   45.23
   3 -25   2   35.94   30.22
  -3 -25  -2  134.61   58.97
   3 -25   2   98.42   43.87
   3  25   3  676.38  157.86
  -3  25  -3  882.90  128.40
   3 -25   3  715.57  118.63
  -3 -25  -3  831.40  141.73
   3  25   4 5895.85  345.68
  -3  25  -4 6410.41  381.49
   3 -25   4 6097.55  350.31
  -3 -25  -4 7593.21  451.50
   3  25   5  294.70   76.69
  -3  25  -5  475.80   97.26
  -3 -25  -5  420.69  118.39
   3  25   6   46.14   25.98
  -3  25  -6  171.57   78.73
  -3 -25  -6  104.68   42.50
   3  25   7  -13.52   31.25
  -3  25  -7   94.95   49.41
  -3 -25  -7  141.02   71.82
  -3  25  -8   61.72   49.56
  -3 -25  -8   78.93   50.39
  -3  25  -9  147.69   43.11
  -3 -25  -9  193.76   78.91
   3  27  -9  122.86   37.60
   3 -27  -9  118.37   55.95
   3  27  -8  390.09  142.89
   3 -27  -8  382.78  108.73
   3  27  -7  892.88  182.99
  -3 -27   7  800.31  136.94
   3 -27  -7 1050.03  187.29
   3  27  -6  161.01   71.62
  -3 -27   6  100.19   46.52
   3 -27  -6   46.91   51.87
   3  27  -5   84.67   47.75
  -3 -27   5  165.34   53.42
   3 -27  -5   43.16   46.57
  -3  27   4  100.77   32.81
   3  27  -4  358.74   79.55
  -3 -27   4  138.99   43.22
   3 -27  -4  322.63   83.13
   3  27  -3  630.49  169.73
  -3  27   3  452.33  111.09
  -3 -27   3  472.47  144.11
   3 -27  -3  486.47  141.53
  -3  27   2  191.21   59.68
   3  27  -2  490.18  135.79
  -3  27   2  508.23  140.29
  -3 -27   2  607.12  160.72
   3 -27  -2  368.05   95.93
  -3  27   1  270.33   61.89
   3  27  -1  527.71   84.93
  -3  27   1  637.34  103.32
  -3 -27   1  501.68   88.19
   3 -27  -1  601.01   96.55
   3  27   0  835.42  137.93
  -3  27   0  807.81  153.83
  -3 -27   0  832.67  125.21
   3 -27   0  844.03  110.35
   3  27   1  363.15   76.63
  -3  27  -1  328.75   61.36
  -3 -27  -1  230.18   53.89
   3 -27   1  301.33   57.40
   3  27   2    1.37   18.16
  -3  27  -2   75.35   30.76
   3 -27   2   12.42   16.10
  -3 -27  -2   87.53   50.16
   3 -27   2   42.82   28.82
   3  27   3  804.74  210.54
  -3  27  -3 1432.41  181.32
   3 -27   3 1254.16  124.61
  -3 -27  -3 1306.43  189.20
   3  27   4  145.86   46.22
  -3  27  -4  252.41   66.06
   3 -27   4  126.32   32.77
  -3 -27  -4  200.49   74.40
   3  27   5  -32.77   22.51
  -3  27  -5   36.75   39.60
  -3 -27  -5   54.73   32.33
   3  27   6   54.55   26.40
  -3  27  -6  104.14   74.81
  -3 -27  -6    1.61   28.69
  -3  27  -7  598.40  157.52
  -3 -27  -7  617.29  160.82
  -3  27  -8   13.22   35.27
  -3 -27  -8  180.23   77.05
   3  29  -8  116.63   56.80
   3 -29  -8  109.47   48.18
   3  29  -7  732.87  196.91
   3 -29  -7  601.33  208.91
   3  29  -6 2378.92  203.27
  -3 -29   6 2267.14  188.06
   3 -29  -6 2101.42  291.73
   3  29  -5  623.59  116.24
  -3 -29   5  526.11   93.86
   3 -29  -5  671.12  140.39
   3  29  -4 7464.20  437.11
  -3 -29   4 5897.53  346.98
   3 -29  -4 5973.72  355.12
   3  29  -3 2836.34  189.49
  -3  29   3 2622.89  163.68
  -3 -29   3 2424.18  270.01
   3 -29  -3 2430.33  167.18
  -3  29   2   73.70   27.61
   3  29  -2  108.24   55.70
  -3 -29   2  123.62   55.58
   3 -29  -2  152.44   49.11
   3  29  -1 3151.66  314.97
  -3  29   1 2801.30  193.57
  -3 -29   1 2576.68  226.23
   3 -29  -1 2719.83  193.41
   3  29   0 4391.16  301.33
  -3  29   0 4056.75  276.87
  -3 -29   0 3936.26  340.51
   3 -29   0 4003.05  272.96
   3  29   1 1708.89  284.89
  -3  29  -1 2105.13  256.92
  -3 -29  -1 2211.28  281.25
   3 -29   1 2218.83  214.13
   3  29   2 4547.57  310.57
  -3  29  -2 4799.73  325.58
  -3 -29  -2 5117.68  351.62
   3 -29   2 5193.74  355.23
   3  29   3 1657.47  300.32
  -3  29  -3 1942.06  186.42
   3 -29   3 2302.28  147.80
  -3 -29  -3 2441.80  252.79
   3  29   4  130.10   43.00
  -3  29  -4   98.28   52.25
  -3 -29  -4   62.38   22.97
   3  29   5 3420.79  210.58
  -3  29  -5 3471.30  214.39
  -3 -29  -5 3415.40  258.15
  -3  29  -6 4245.53  326.07
  -3 -29  -6 4369.00  420.75
  -3  29  -7  531.19  149.49
  -3 -29  -7  797.52  194.16
  -3 -29  -8  631.71  171.09
   3  31  -7   51.19   50.57
   3 -31  -7  217.67   79.21
   3  31  -6  248.74   91.75
   3 -31  -6  361.58  114.69
   3  31  -5 7847.75  589.29
  -3 -31   5 5922.09  446.21
   3 -31  -5 6683.08  504.46
   3  31  -4 1566.75  282.65
  -3 -31   4  802.52  195.83
   3 -31  -4 1246.82  254.55
   3  31  -3  198.31   75.89
  -3  31   3  154.26   46.53
  -3 -31   3   63.38   51.37
   3 -31  -3  130.38   53.56
  -3  31   2  534.13  143.32
   3  31  -2  569.80  137.18
  -3 -31   2  776.41   77.92
   3 -31  -2  654.56  167.88
   3  31  -1  150.23   62.89
  -3  31   1  101.96   41.16
  -3 -31   1  108.69   39.19
   3 -31  -1   68.30   41.53
   3  31   0  306.16   81.44
  -3  31   0  323.78   72.17
  -3 -31   0  246.81   81.13
   3 -31   0  217.49   58.50
   3  31   1 6888.97  418.26
  -3  31  -1 7763.62  470.21
  -3 -31  -1 7633.00  467.10
   3 -31   1 7888.13  478.24
   3  31   2  847.99  222.12
  -3  31  -2 1505.75  171.85
  -3 -31  -2 1668.85   99.78
   3 -31   2 1715.80  195.69
   3  31   3  119.83   53.15
  -3  31  -3  198.19   56.53
   3 -31   3  172.87   46.35
  -3 -31  -3  238.24   84.92
   3  31   4  108.81   44.32
  -3  31  -4  266.45   78.05
  -3 -31  -4  163.62   76.63
   3  31   5    9.71   15.50
  -3  31  -5   38.99   47.38
  -3 -31  -5   81.35   54.43
  -3  31  -6  482.84  130.89
  -3 -31  -6  484.00  173.25
  -3  31  -7 1648.46  402.62
  -3 -31  -7 2337.13  401.91
   3  33  -6  642.22  202.38
   3 -33  -6  670.25  161.19
   3  33  -5 1323.42  410.61
  -3 -33   5 1414.03  235.54
   3 -33  -5 1576.84  367.24
   3  33  -4 1849.12  269.54
  -3 -33   4  996.12  314.24
   3 -33  -4 1816.29  267.26
   3  33  -3  298.54   90.66
  -3 -33   3  221.92   91.60
   3 -33  -3  197.92   71.03
  -3  33   2  247.24   52.19
   3  33  -2  166.76   53.58
  -3 -33   2  176.16   54.47
   3 -33  -2  241.07   63.07
   3  33  -1   71.03   21.90
  -3  33   1   33.86   20.03
  -3 -33   1   50.67   45.26
   3 -33  -1   31.52   37.88
  -3  33   0  421.00   76.52
  -3 -33   0  415.12   84.17
   3 -33   0  313.24   71.51
   3  33   1 4220.12  249.36
  -3  33  -1 4105.12  253.17
  -3 -33  -1 4435.16  270.82
   3 -33   1 4155.50  312.09
   3  33   2 1069.85  198.91
  -3  33  -2 1434.69  194.83
   3 -33   2 1298.30  273.01
  -3 -33  -2 1659.68  151.57
   3  33   3    6.34   18.06
  -3  33  -3   35.56   62.61
  -3 -33  -3   23.95   48.56
   3  33   4   70.70   25.82
  -3  33  -4  179.84   61.63
  -3 -33  -4  126.46   70.88
  -3  33  -5  311.01  103.94
  -3 -33  -5  214.52   81.19
  -3  33  -6  379.52  113.30
  -3 -33  -6  245.01   86.11
   3  35  -5   76.03   49.73
   3 -35  -5    6.65   42.97
   3  35  -4  190.38   70.50
  -3 -35   4  151.94   64.98
   3 -35  -4  207.06   72.84
   3  35  -3 1581.95  264.34
  -3 -35   3  899.01  304.47
   3 -35  -3  906.71  270.45
  -3  35   2  779.54  235.77
   3  35  -2 1049.94  218.33
  -3 -35   2 1054.55  272.64
   3 -35  -2 1243.33  236.90
  -3  35   1 4792.58  365.37
   3  35  -1 4818.16  391.02
  -3 -35   1 5105.35  387.33
   3 -35  -1 4979.98  373.00
   3  35   0  218.60   68.72
  -3  35   0  371.28  130.38
  -3 -35   0   64.34   38.22
   3 -35   0  157.99   46.89
   3  35   1   98.28   57.35
  -3  35  -1  142.88   63.51
   3 -35   1  105.87   42.31
  -3 -35  -1   93.68   52.04
   3  35   2  138.08   53.52
  -3  35  -2   68.63   30.55
  -3 -35  -2  106.30   56.14
   3 -35   2  116.96   36.81
   3  35   3  494.38  226.39
  -3  35  -3 1213.20  371.02
  -3 -35  -3 1641.03  275.55
   3  35   4  629.88  146.25
  -3  35  -4 1014.63  370.04
  -3 -35  -4 1315.33  264.79
  -3  35  -5  160.36   70.66
  -3 -35  -5  320.49  109.77
   3  37  -4  119.36   67.38
   3 -37  -4  110.30   55.18
   3  37  -3 1601.66  215.82
  -3 -37   3 1411.40  310.85
   3 -37  -3 1277.77  231.90
   3  37  -2  133.21   55.96
  -3 -37   2   18.22   26.46
   3 -37  -2   26.49   29.43
  -3  37   1 1026.50  303.89
   3  37  -1 1881.66  311.14
  -3 -37   1 1770.55  292.78
   3 -37  -1 1764.78  291.13
   3  37   0   59.20   40.49
  -3  37   0   58.23   29.99
  -3 -37   0   18.12   36.89
   3 -37   0   15.50   23.98
   3  37   1   48.48   34.17
  -3  37  -1   -7.15   42.65
   3 -37   1   71.72   38.26
  -3 -37  -1   46.23   41.13
   3  37   2   36.36   36.44
  -3  37  -2  117.84   49.92
  -3 -37  -2   71.60   52.81
  -3  37  -3 3376.58  561.37
  -3 -37  -3 3896.50  634.82
   3  39  -1  119.29   29.86
  -3 -39   1  170.78   52.36
   3 -39  -1   99.50   52.73
   3  39   0  232.06  123.58
  -3 -39   0  205.55  115.03
   3 -39   0  358.60  123.35
   3  39   1  182.94   77.29
  -3  39  -1  138.05   48.19
  -3 -39  -1  190.92   71.89
   4   0 -11    9.96   11.76
   4   0 -10  803.06  163.73
  -4   0  10  856.64  280.15
   4   0  -9   20.21   19.67
  -4   0   9   76.29   38.83
   4   0  -8 4140.11  214.16
   4   0  -8 4687.42  215.10
  -4   0   8 4477.37  244.25
   4   0  -7   84.39   34.26
   4   0  -7   33.31   17.53
  -4   0   7   55.15   32.87
   4   0  -6  795.30  128.53
  -4   0   6  753.38   90.42
  -4   0   6  807.00  102.71
   4   0  -6  554.03  111.12
   4   0  -5    6.33   15.58
  -4   0   5   -3.97   13.54
  -4   0   5   81.76   40.15
   4   0  -5   11.71   12.86
   4   0  -422723.35  633.29
  -4   0   420057.02  561.66
  -4   0   421943.98  625.87
   4   0  -421406.96  606.05
   4   0  -3   16.15    8.92
  -4   0   3   61.69   14.84
  -4   0   3    3.85   24.71
   4   0  -3   15.28   19.03
   4   0  -220013.84  344.69
  -4   0   219309.57  331.73
  -4   0   219135.34  340.62
   4   0  -220308.77  358.43
  -4   0   1   49.50   15.60
   4   0  -1   49.64   14.71
  -4   0   1   -4.47   19.54
   4   0  -1   27.81   13.80
   4   0   0   43.14   23.62
  -4   0   0   36.65   17.59
  -4   0   0   42.70   17.89
   4   0   0   47.08   19.51
  -4   0  -1   19.65   13.17
   4   0   1   25.83   25.08
  -4   0  -1   49.02   22.54
   4   0   1   25.09   14.29
   4   0   2 5605.82  148.36
  -4   0  -2 5286.60  121.30
  -4   0  -2 4692.04   91.91
   4   0   2 5204.99  102.65
   4   0   3   62.11   27.17
  -4   0  -3   26.94   21.48
  -4   0  -3   84.78   13.23
   4   0   3   41.66   18.74
   4   0   4 2334.54  114.21
  -4   0  -4 2184.57   89.25
  -4   0  -4 2358.05  100.21
   4   0   4 2518.88   81.17
   4   0   5   74.83   49.78
  -4   0  -5   15.56   23.13
  -4   0  -5   39.90   18.24
   4   0   6 2513.45  212.47
  -4   0  -6 2090.37  150.21
  -4   0  -6 2347.53  167.38
   4   0   7  112.68   67.22
  -4   0  -7   25.51   21.88
  -4   0  -7   35.30   20.22
   4   0   8 2089.82  442.53
  -4   0  -8 1912.08  198.16
   4   0   9    6.41   45.95
  -4   0  -9   -0.28   14.83
   4   0  10  448.56  209.35
  -4   0 -10  867.00  147.71
  -4   0 -11   64.25   36.22
   4   2 -11  756.92  215.81
  -4  -2  11  276.02  210.53
   4   2 -10   72.12   26.73
  -4   2  10   93.71   54.15
  -4  -2  10  153.15   71.59
   4  -2 -10  194.27   49.80
  -4   2   9 3367.25  261.10
   4   2  -9 3547.72  239.55
   4  -2  -9 3513.06  248.07
  -4  -2   9 3583.83  294.41
   4  -2  -9 2147.85  241.93
  -4   2   8 1157.15  190.44
   4   2  -8  580.51  208.91
   4   2  -8 1299.30  194.77
   4  -2  -8 1398.89  173.88
   4  -2  -8  692.95  219.00
  -4  -2   8 1525.68  200.64
  -4   2   7  626.22  146.99
   4   2  -7  654.94  128.41
   4  -2  -7  674.44  115.53
  -4  -2   7  550.59   75.06
   4  -2  -7  451.80   99.13
  -4   2   6  113.09   49.15
   4   2  -6   56.84   16.94
   4   2  -6  107.58   31.77
  -4  -2   6   85.94   29.75
   4  -2  -6   86.08   28.42
  -4  -2   6   51.85   27.63
   4  -2  -6   71.12   21.18
   4  -2  -6   36.43   20.11
  -4   2   511110.82  371.19
   4   2  -512324.72  399.40
   4   2  -511538.64  377.44
  -4   2   511978.96  381.64
   4  -2  -512165.93  387.05
  -4  -2   511682.11  387.33
  -4  -2   511151.28  361.53
   4  -2  -510884.27  358.36
   4   2  -4  605.82   50.74
  -4   2   4  637.72   73.62
   4   2  -4  653.34   57.44
  -4   2   4  713.20   76.67
  -4  -2   4  609.62   87.93
   4  -2  -4  710.90   53.36
  -4  -2   4  646.99  108.64
   4  -2  -4  604.38   97.15
  -4   2   314984.35  432.44
   4   2  -315502.50  435.88
  -4   2   315205.90  425.00
   4   2  -315403.39  438.91
  -4  -2   315401.15  434.04
   4  -2  -314889.90  425.40
   4  -2  -315424.58  431.23
  -4  -2   314410.77  413.71
  -4   2   2 2612.17  190.73
   4   2  -2 2514.03  143.88
  -4   2   2 2719.82  191.16
   4   2  -2 2528.74  150.58
   4  -2  -2 2448.51  139.17
  -4  -2   2 2590.91  188.07
   4  -2  -2 2492.06  145.74
  -4  -2   2 2396.61  147.08
   4   2  -1 1100.65   68.67
  -4   2   1  983.99   60.34
   4   2  -1  909.49   63.17
  -4   2   1 1179.81  114.70
   4  -2  -1 1091.45   70.18
  -4  -2   1 1240.81  115.57
   4  -2  -1 1123.40   72.19
  -4  -2   1 1047.95   76.46
  -4   2   0   35.60   16.28
   4   2   0   58.57   14.35
  -4   2   0   33.32   16.10
   4   2   0   86.56   17.62
   4  -2   0   37.03   28.43
  -4  -2   0   72.10   20.62
   4  -2   0   24.02   13.38
  -4  -2   0   91.19   19.75
   4   2   125817.38  453.91
  -4   2  -128001.44  488.31
  -4   2  -129093.24  497.84
   4   2   128127.18  479.39
   4  -2   129557.44  503.38
  -4  -2  -129605.02  505.73
  -4   2  -2   47.12   15.02
  -4   2  -2   34.76   22.11
   4   2   2  106.22   36.22
   4   2   2   69.13   29.42
   4  -2   2   51.02   41.75
  -4  -2  -2  115.80   27.96
  -4  -2  -2   17.36   14.20
   4  -2   2   60.41   19.79
  -4   2  -3  258.15   37.23
   4   2   3  239.56   42.55
   4   2   3  282.79   44.67
  -4   2  -3  259.80   26.57
   4  -2   3  255.33   70.85
  -4  -2  -3  353.78   48.89
   4  -2   3  246.55   24.51
  -4  -2  -3  224.71   38.47
   4   2   4 1050.72  101.48
  -4   2  -4 1282.27  111.85
  -4   2  -4 1058.82   77.48
   4   2   4 1132.85  100.87
   4  -2   4  913.71   93.21
  -4  -2  -4 1092.19   89.35
  -4  -2  -4 1067.39   82.04
  -4   2  -5  121.86   29.61
   4   2   5  170.06   43.05
  -4   2  -5  123.35   38.94
  -4  -2  -5   89.68   25.98
   4  -2   5  101.86   52.55
  -4  -2  -5  123.76   25.05
   4   2   6  427.95   90.31
  -4   2  -6  300.83   45.69
  -4   2  -6  288.10   41.10
   4  -2   6  549.77  152.91
  -4  -2  -6  253.34   44.81
  -4  -2  -6  284.79   46.72
  -4  -2  -6  334.06   67.52
   4   2   7 9607.30  376.40
  -4   2  -7 9299.65  319.27
   4  -2   7 8963.05  370.32
  -4  -2  -7 9252.48  323.59
  -4  -2  -7 7742.32  276.10
   4   2   8   60.02   65.27
  -4   2  -8   53.29   28.89
  -4   2  -8   13.50   14.20
   4  -2   8    9.12   41.95
  -4  -2  -8   11.82   17.99
  -4  -2  -8   -0.38   20.21
   4   2   9  235.34  117.67
  -4   2  -9  148.78   52.51
  -4  -2  -9  150.40   51.82
   4  -2   9  179.24  102.59
   4   2  10  107.39   56.76
  -4   2 -11   97.53   60.77
  -4  -2 -11   41.62   33.79
   4   4 -11  460.87  202.56
  -4  -4  11  691.21  240.56
   4   4 -10  933.43  188.70
  -4   4  10 1323.80  111.75
  -4  -4  10  891.65  287.57
  -4   4   9   89.54   43.45
   4   4  -9  195.62   53.17
   4  -4  -9   40.69   19.52
  -4  -4   9   46.17   49.58
   4  -4  -9   -2.27   20.68
   4   4  -8  210.35   79.00
  -4   4   8  215.05   78.94
   4   4  -8  370.27   60.43
   4  -4  -8  232.51   45.90
  -4  -4   8  354.72   68.25
   4  -4  -8  216.13   66.47
  -4   4   7 3741.02  211.74
   4   4  -7 3638.83  206.25
   4  -4  -7 4076.65  211.39
  -4  -4   7 3734.89  210.34
  -4   4   6   31.58   33.49
   4   4  -6   15.23   21.26
   4   4  -6    7.46   14.65
   4  -4  -6   17.71    8.85
  -4  -4   6  -19.04   20.68
  -4  -4   6   65.13   46.34
   4  -4  -6    4.73   11.80
  -4   4   5  779.17   85.73
   4   4  -5  627.50   85.71
  -4   4   5  639.78   63.45
   4   4  -5  658.07   95.78
  -4  -4   5  602.17   70.68
   4  -4  -5  587.62   63.59
  -4  -4   5  671.38   76.08
   4  -4  -5  618.47  107.93
  -4   4   4  177.37   28.95
   4   4  -4  288.82   50.53
  -4   4   4   94.33   37.20
   4   4  -4  174.75   30.13
   4  -4  -4  190.23   28.08
   4  -4  -4  126.34   32.40
  -4  -4   4  182.42   43.44
  -4  -4   4  248.30   45.52
   4   4  -3 1961.37  142.32
  -4   4   3 2239.00  159.05
  -4   4   3 1891.76  151.46
   4   4  -3 2045.62  149.11
   4  -4  -3 2220.06  156.91
  -4  -4   3 2321.46  169.71
   4  -4  -3 2327.07  169.29
  -4  -4   3 2068.15  153.31
  -4   4   2 1098.19   78.03
  -4   4   2 1105.33   65.43
   4   4  -2 1013.28   64.57
   4   4  -2  967.12   64.05
   4  -4  -2 1327.54  118.80
   4  -4  -2 1053.96   68.40
  -4  -4   2 1145.07   97.76
  -4  -4   2 1034.43   64.81
   4   4  -1 9758.37  180.79
  -4   4   1 9344.77  179.16
   4   4  -1 9338.38  174.96
   4  -4  -1 8599.47  164.05
  -4  -4   1 9017.73  165.48
   4  -4  -1 9581.46  178.53
  -4  -4   1 9028.04  170.75
  -4   4   0  337.16   33.19
  -4   4   0  272.22   44.14
   4   4   0  220.89   31.86
   4   4   0  238.24   35.27
   4  -4   0  303.70   55.63
   4  -4   0  235.55   41.16
  -4  -4   0  213.69   30.69
  -4  -4   0  189.60   28.55
  -4   4  -1 2311.20  135.43
   4   4   1 2434.13  147.28
  -4   4  -1 1923.73  118.22
   4   4   1 2180.64  126.26
  -4  -4  -1 2213.33  128.74
   4  -4   1 2158.59  125.04
   4  -4   1 2159.05  164.46
  -4  -4  -1 2094.81  122.62
  -4   4  -2  152.80   24.94
  -4   4  -2   46.45   31.93
   4   4   2   91.32   21.78
   4   4   2  156.27   24.25
   4  -4   2   65.77   38.54
   4  -4   2  145.01   21.91
  -4  -4  -2  138.47   26.56
  -4  -4  -2   88.44   17.11
  -4   4  -3 1619.48  115.48
  -4   4  -3 1908.09  154.02
   4   4   3 1320.52  109.33
   4   4   3 1306.15   99.80
  -4  -4  -3 1820.34  134.97
   4  -4   3 1335.79  121.19
   4  -4   3 1312.67   94.88
  -4  -4  -3 1515.43  113.15
  -4   4  -4 5461.87  149.66
   4   4   4 5929.92  200.06
  -4   4  -4 5983.73  201.41
   4   4   4 5174.91  154.55
  -4  -4  -4 6478.80  194.44
  -4  -4  -4 5803.04  172.65
   4  -4   4 5704.85  212.31
  -4   4  -5 3144.24  133.55
   4   4   5 2917.12  151.32
  -4   4  -5 2971.75  159.78
  -4   4  -5 3199.74  133.30
   4  -4   5 2812.38  163.39
  -4  -4  -5 3050.24  146.02
  -4  -4  -5 3266.85  144.90
  -4   4  -6 1001.83   76.06
   4   4   6 1062.70  204.64
  -4   4  -6 1167.45   90.86
  -4  -4  -6  855.99  127.94
   4  -4   6  978.66  209.99
  -4  -4  -6 1055.90   89.08
   4   4   7  277.49   85.26
  -4   4  -7  146.37   49.36
  -4  -4  -7  120.42   45.33
   4  -4   7  353.34  112.17
  -4  -4  -7  203.14   62.79
   4   4   8   62.29   50.30
  -4   4  -8  123.80   32.17
  -4   4  -8  105.77   30.23
   4  -4   8  167.99   78.24
  -4  -4  -8  193.27   60.66
   4   4   9  779.78  185.24
  -4   4  -9  492.74   89.69
   4  -4   9  463.74  207.20
  -4  -4  -9  559.96  128.29
  -4   4 -10 1051.12  181.59
  -4  -4 -10 1111.02  181.92
  -4   4 -11   41.15   25.85
   4   6 -11  189.13   73.60
   4   6 -10  647.85  149.14
  -4  -6  10  503.50  206.53
   4   6  -9  572.39  128.91
  -4   6   9  715.18  135.98
   4  -6  -9  544.03  110.90
  -4  -6   9 1057.75  135.97
   4   6  -8   86.94   36.08
  -4   6   8  130.33   71.06
   4  -6  -8  115.35   46.19
  -4  -6   8  240.38   61.39
  -4   6   7  265.74   84.22
   4   6  -7  372.45   86.07
   4   6  -7  122.51   33.71
   4  -6  -7  229.26   62.74
  -4  -6   7  192.54   70.83
  -4  -6   7  283.56   75.73
   4  -6  -7  184.28   50.45
  -4   6   6  608.82  117.38
   4   6  -6  608.52  105.76
   4   6  -6  562.83  121.89
   4  -6  -6  461.55   70.69
  -4  -6   6  358.70   82.34
  -4  -6   6  424.65   68.52
   4  -6  -6  267.30   73.34
  -4   6   5 4598.32  179.45
   4   6  -5 4539.00  157.92
   4   6  -5 4950.34  173.23
   4  -6  -5 4967.17  159.37
   4  -6  -5 5261.62  178.01
  -4  -6   5 5117.05  188.01
   4  -6  -5 4888.95  176.95
  -4  -6   5 4421.44  154.85
  -4   6   4 1327.22  110.24
   4   6  -4 1337.48  125.51
  -4   6   4 1094.92   76.84
   4   6  -4 1002.76   77.96
   4  -6  -4 1036.22   73.08
   4  -6  -4 1138.59   93.09
  -4  -6   4 1180.85  128.11
  -4  -6   4  911.73   76.18
  -4   6   3   31.96   28.44
   4   6  -3  146.51   27.24
  -4   6   3   56.75    9.72
   4   6  -3   28.80   23.75
   4  -6  -3   38.11   11.80
   4  -6  -3   64.54   19.15
  -4  -6   3   89.98   33.42
  -4  -6   3   27.10   19.66
   4   6  -2 1928.79  115.13
  -4   6   2 1825.07  103.93
   4   6  -2 1954.33  116.59
  -4   6   2 1770.66  112.95
   4  -6  -2 2439.35  173.92
  -4  -6   2 1649.58   98.22
   4  -6  -2 1837.47  111.35
  -4  -6   2 1760.97  106.89
  -4   6   1  362.00   48.49
   4   6  -1  376.50   69.10
  -4   6   1  216.75   30.03
   4   6  -1  280.01   31.80
   4  -6  -1  255.71   37.63
  -4  -6   1  316.07   48.97
   4  -6  -1  333.10   33.53
  -4  -6   1  381.60   47.36
  -4   6   0  803.23   55.28
  -4   6   0  690.81   50.76
   4   6   0  869.56   73.35
   4   6   0  795.63   53.53
   4  -6   0  800.24   74.42
   4  -6   0  859.73   56.95
  -4  -6   0  819.45   69.36
  -4  -6   0  717.94   50.05
  -4   6  -1 4159.72  110.20
   4   6   1 3424.12   83.63
   4   6   1 3854.64   85.25
  -4   6  -1 3914.04   83.87
   4  -6   1 3943.36   82.95
  -4  -6  -1 3703.45   93.42
  -4  -6  -1 3804.17   82.28
  -4   6  -2   56.13   17.98
  -4   6  -2   -7.69   29.45
   4   6   2   64.88   38.61
   4   6   2   26.41   15.19
   4  -6   2  110.37   48.93
   4  -6   2   49.76   15.50
  -4  -6  -2   45.07   21.19
  -4  -6  -2   51.25   20.49
  -4   6  -3 1021.36   72.12
  -4   6  -3  959.16   99.14
   4   6   3  862.50   77.51
   4   6   3  855.54   85.83
  -4  -6  -3  925.43   72.86
  -4  -6  -3 1043.56  120.89
   4  -6   3  917.40   91.87
   4  -6   3  799.34   56.77
  -4   6  -4  565.55   49.55
  -4   6  -4  436.04   59.04
   4   6   4  748.83   98.58
   4   6   4  473.89   60.12
  -4  -6  -4  759.93   90.25
  -4  -6  -4  749.76  103.85
   4  -6   4  724.39  116.66
  -4   6  -5  703.59   79.21
   4   6   5  856.10  197.43
  -4   6  -5  648.99   73.69
  -4  -6  -5  817.03  143.48
   4  -6   5  805.18  203.10
  -4  -6  -5  654.97   95.80
  -4   6  -6 1243.19   92.34
   4   6   6 1244.83  120.59
  -4   6  -6 1198.48   91.06
  -4  -6  -6 1131.21  157.28
   4  -6   6 1258.87  269.78
  -4  -6  -6 1249.14  108.48
  -4   6  -7 1183.26  144.14
   4   6   7 1149.30  232.89
  -4   6  -7 1161.31  140.27
   4  -6   7 1230.67  245.80
  -4  -6  -7 1245.67  242.64
  -4   6  -8   68.92   23.53
   4   6   8   87.04   58.12
  -4   6  -8   87.81   23.03
   4  -6   8   39.22   62.52
  -4  -6  -8  160.57   62.10
   4   6   9  736.67  123.01
  -4   6  -9  670.89  142.59
  -4  -6  -9  510.80  161.87
   4   6  10 1179.81  263.80
  -4   6 -10 1424.34  133.43
  -4  -6 -10 1632.02  145.40
  -4   6 -11   21.89   41.38
  -4  -6 -11  -18.90   23.77
   4   8 -12  110.37   34.94
   4   8 -11  273.34  109.38
  -4  -8  11  157.07   60.90
   4   8 -10  180.13   61.37
  -4  -8  10  197.10   54.26
   4   8  -9  250.76   72.67
   4  -8  -9  159.40   46.91
  -4  -8   9  138.05   47.88
   4   8  -8  183.50   54.44
  -4   8   8  114.75   54.00
   4  -8  -8  144.99   43.83
   4  -8  -8  121.62   47.00
  -4  -8   8  179.44   44.16
   4   8  -7 5615.09  205.99
   4   8  -7 6432.80  236.73
   4  -8  -7 4817.09  163.30
   4   8  -6  336.57   79.32
  -4   8   6  334.38  102.49
   4   8  -6  307.89   49.56
  -4  -8   6  185.21   47.99
  -4  -8   6  413.68   70.18
   4   8  -5   76.03   50.72
   4   8  -5  147.02   36.18
  -4   8   5   61.15   32.34
   4  -8  -5   25.24   21.93
  -4  -8   5   46.64   23.04
  -4  -8   5   42.72   26.54
   4   8  -4 2124.67   81.10
   4   8  -4 1827.54  132.19
  -4   8   4 1729.85  204.69
   4  -8  -4 1872.66  184.81
  -4  -8   4 1827.79  138.40
  -4  -8   4 1625.44  179.19
  -4   8   3  601.24   92.62
   4   8  -3  537.17   85.60
  -4   8   3  528.51   42.72
   4   8  -3  494.30   44.99
   4  -8  -3  367.71   32.70
   4  -8  -3  448.70   74.86
  -4  -8   3  586.19   57.68
  -4  -8   3  559.93   95.42
  -4   8   2  370.72   52.21
  -4   8   2  447.60   51.37
   4   8  -2  477.87   89.67
   4   8  -2  293.99   54.70
   4  -8  -2  244.10   35.69
   4  -8  -2  265.46   35.79
  -4  -8   2  294.74   39.18
  -4  -8   2  346.64   68.37
  -4   8   117467.50  497.94
  -4   8   115490.75  437.67
   4   8  -117296.51  494.81
   4   8  -117061.29  481.10
   4  -8  -115138.59  434.91
   4  -8  -116651.80  472.51
  -4  -8   117225.48  488.62
  -4  -8   116288.96  459.65
  -4   8   0   96.50   27.09
  -4   8   0   27.72   37.60
   4   8   0   81.33   31.42
   4   8   0   59.87   23.93
  -4  -8   0   41.67   19.50
   4  -8   0   27.96   18.43
   4  -8   0   39.83   31.11
  -4  -8   0   53.21   29.69
  -4   8  -1 1142.63   86.50
  -4   8  -1 1136.97   97.04
   4   8   1 1076.86   82.86
   4   8   1 1157.60  120.87
   4  -8   1 1260.23  127.52
   4  -8   1 1271.76   94.54
  -4  -8  -1 1375.63  133.77
  -4  -8  -1  963.82   76.37
  -4   8  -2 3132.97   94.33
  -4   8  -2 3182.51  141.16
   4   8   2 3536.42  128.10
   4   8   2 3098.81  103.22
   4  -8   2 3495.82  383.53
   4  -8   2 2968.79   87.43
  -4  -8  -2 3265.15  135.71
  -4  -8  -2 3264.35  108.02
   4   8   3 7914.84  239.13
  -4   8  -3 7421.90  232.90
   4   8   3 7619.77  222.78
   4  -8   3 7936.77  275.91
  -4  -8  -3 7784.38  224.89
  -4  -8  -3 7631.23  220.65
   4   8   4  197.03   43.09
  -4   8  -4   89.37   26.79
   4   8   4  122.32   23.46
   4  -8   4  209.04   57.27
  -4  -8  -4  268.85   61.53
  -4  -8  -4  117.71   21.49
   4   8   5 7925.84  340.80
   4  -8   5 6416.21  307.56
  -4  -8  -5 6859.10  282.27
  -4  -8  -5 7466.46  308.28
   4   8   6  669.04   82.96
   4  -8   6  748.53  163.06
  -4  -8  -6  531.36  105.67
  -4  -8  -6  794.06   76.65
   4   8   7  657.82  158.19
   4  -8   7  700.63  173.52
  -4  -8  -7  996.81  173.44
   4   8   8  608.86  137.50
  -4   8  -8  271.60   45.87
  -4  -8  -8  344.22   67.52
   4   8   9 3897.44  484.45
  -4   8  -9 3344.77  208.30
  -4  -8  -9 3643.61  230.86
   4   8  10    2.93   40.36
  -4   8 -10  129.21   55.74
  -4  -8 -10   -3.48   31.26
  -4   8 -11 1959.43  243.68
   4  10 -11  190.03   69.24
  -4 -10  11  146.62   56.86
   4  10 -10 1176.20  202.05
  -4 -10  10 1336.35  238.74
   4  10  -9  958.59  116.86
  -4 -10   9 1203.88  148.35
   4  10  -8 1412.73  160.61
  -4 -10   8 1658.12  184.59
   4  10  -7  179.53   62.71
  -4  10   7  153.84   54.19
   4  10  -7   57.16   22.45
  -4 -10   7   55.06   26.96
   4  10  -6 1523.59  181.55
  -4  10   6 1757.39  212.50
   4  10  -6 1559.77  160.54
  -4 -10   6 1763.68  151.69
   4  10  -5 2140.20  105.22
  -4  10   5 2191.12  154.85
   4  10  -5 2306.90  108.75
  -4 -10   5 1995.23  101.17
  -4 -10   5 2110.74  204.41
   4  10  -4 1397.26   68.82
   4  10  -4 1283.67  170.37
  -4  10   4 1486.72  136.43
   4 -10  -4 1180.22  111.56
  -4 -10   4 1227.87  116.57
  -4 -10   4  962.94  149.05
  -4  10   3 4574.37  124.12
   4  10  -3 4458.23  154.03
   4  10  -3 4654.07  139.23
  -4  10   3 5019.61  225.21
   4 -10  -3 4505.27  142.97
  -4 -10   3 4486.77  145.66
  -4 -10   3 4394.47  134.71
  -4  10   2 4398.06  223.63
  -4  10   2 4007.65  120.75
   4  10  -2 4196.98  134.09
   4  10  -2 4025.61  126.30
   4 -10  -2 4282.47  201.56
   4 -10  -2 3814.42  127.70
  -4 -10   2 4078.52  134.82
  -4 -10   2 3980.09  127.21
  -4  10   1  808.25   97.15
  -4  10   1  756.30   93.73
   4  10  -1  783.00   66.88
   4  10  -1  701.76   70.69
   4 -10  -1  660.92   79.81
   4 -10  -1  582.84   70.33
  -4 -10   1  769.95   75.54
  -4 -10   1  907.19  122.99
  -4  10   0   13.13   18.41
  -4  10   0   10.05   19.76
   4  10   0   16.03   24.72
   4  10   0    1.32    7.40
   4 -10   0    6.27   13.20
   4 -10   0  110.73   27.94
  -4 -10   0   43.87   40.80
  -4 -10   0   15.03   14.91
  -4  10  -1 6675.69  199.27
  -4  10  -1 6182.15  199.03
   4  10   1 6442.53  197.81
   4  10   1 6535.25  195.83
   4 -10   1 6585.19  234.77
   4 -10   1 5942.94  172.46
  -4 -10  -1 6408.17  196.02
  -4 -10  -1 6057.17  179.74
   4  10   2 1976.96  172.78
  -4  10  -2 2126.32   97.44
   4  10   2 2344.93   84.40
  -4 -10  -2 1964.04  168.65
   4 -10   2 2365.26  217.38
  -4 -10  -2 2374.37   96.87
   4 -10   2 2278.62   66.95
   4  10   3 1494.97   78.41
  -4  10  -3 1132.84  148.94
   4  10   3 1298.08  208.59
   4 -10   3 1606.91  189.88
  -4 -10  -3 1366.15   68.29
  -4 -10  -3 1504.01   66.93
   4  10   411253.42  469.97
  -4  10  -410904.01  471.43
   4  10   411263.25  466.29
   4 -10   411227.21  513.22
  -4 -10  -411945.84  495.12
  -4 -10  -411676.18  479.87
   4  10   5  232.74   62.21
   4 -10   5  160.04   54.70
  -4 -10  -5  120.79   26.56
  -4 -10  -5  175.33   41.11
   4  10   6   31.62   23.75
   4 -10   6  122.48   63.56
  -4 -10  -6   31.50   19.29
  -4 -10  -6  161.27   57.65
   4  10   7  122.51   66.67
  -4 -10  -7  261.33   67.66
   4  10   8  110.87   39.66
  -4  10  -8  347.11   79.46
  -4 -10  -8  150.55   46.06
   4  10   9  250.51  109.51
  -4  10  -9  257.29   74.34
  -4 -10  -9  103.92   51.50
   4  10  10 1327.68  345.85
  -4  10 -10 1791.38  205.25
  -4 -10 -10 1912.41  168.16
  -4  10 -11   58.80   33.46
  -4 -10 -11  238.32   79.99
   4  12 -11  230.77   65.77
   4  12 -10  486.20  128.19
  -4 -12  10  426.25  105.83
   4  12  -9   46.36   29.40
  -4 -12   9   36.11   32.32
   4  12  -8  651.01  161.98
  -4 -12   8  808.35  107.81
   4  12  -710974.83  494.65
  -4 -12   711586.07  522.12
   4  12  -6   70.70   30.64
  -4  12   6   11.18   31.87
   4  12  -6   31.87   16.84
  -4 -12   6   12.27   21.93
   4  12  -5  583.47  127.75
  -4  12   5  430.49   99.56
   4  12  -5  477.29  105.37
  -4 -12   5  475.20   76.97
   4  12  -4  346.72   58.08
   4  12  -4  216.24   49.06
  -4  12   4  305.63   68.93
   4 -12  -4  215.21   40.63
  -4 -12   4  244.81   44.10
  -4 -12   4  166.13   30.85
  -4  12   3   19.49    6.68
   4  12  -3   64.79   22.47
  -4  12   3   16.63   19.79
  -4  12   3   28.91    8.18
   4  12  -3   12.85   23.47
  -4 -12   3   60.38   29.82
  -4 -12   3   -8.13   22.34
   4 -12  -3   84.50   28.20
  -4  12   2 1669.65  122.28
   4  12  -2 1535.01  135.68
  -4  12   2 1721.88  176.60
  -4  12   2 1506.87  124.16
   4  12  -2 1916.46  172.13
  -4 -12   2 1740.32  183.69
  -4 -12   2 1617.82  122.21
   4 -12  -2 1437.24  110.11
  -4  12   1 2184.00  149.00
  -4  12   1 2025.79  140.50
   4  12  -1 1941.30  175.87
   4  12  -1 2013.04   91.73
   4 -12  -1 1904.24  259.51
   4 -12  -1 1752.79  129.97
  -4 -12   1 2131.94   89.86
  -4 -12   1 1997.06   73.26
  -4  12   0  733.61   92.38
  -4  12   0  555.25   61.52
   4  12   0  696.06  107.57
   4  12   0  517.70   75.54
  -4 -12   0  613.10  105.54
   4 -12   0  699.10  104.09
  -4 -12   0  557.92   69.57
   4 -12   0  520.10   47.98
   4  12   1 1787.58  134.81
  -4  12  -1 1435.75  116.66
   4  12   1 1800.04  182.81
  -4 -12  -1 1698.03  122.43
   4 -12   1 2012.49  245.56
  -4 -12  -1 1732.03  131.13
   4 -12   1 1593.76  114.46
   4  12   2   76.52   30.37
  -4  12  -2   82.97   38.10
   4  12   2   84.98   16.33
  -4 -12  -2  124.29   23.07
   4 -12   2   51.50   23.88
  -4 -12  -2  109.93   41.82
   4 -12   2   83.37   13.71
   4  12   3 1542.92   74.18
  -4  12  -3 1108.02  135.44
   4  12   3 1366.61   67.36
   4 -12   3 1663.81  279.47
  -4 -12  -3 1394.34  140.72
  -4 -12  -3 1365.15   61.55
   4  12   4  250.84   40.61
   4  12   4  163.44   44.32
  -4 -12  -4  180.19   33.56
  -4 -12  -4  140.77   27.20
   4 -12   4  220.44   79.74
   4  12   5 2021.24  166.21
   4 -12   5 1945.31  370.50
  -4 -12  -5 2336.57  182.99
   4  12   6   81.58   63.90
  -4  12  -6   82.67   52.12
  -4 -12  -6    7.38   17.35
  -4 -12  -6  116.21   53.63
   4  12   7 1353.80  174.81
  -4  12  -7 1424.19  265.81
  -4 -12  -7 1489.43  272.67
   4  12   8   45.75   45.06
  -4  12  -8   75.91   39.98
  -4 -12  -8   19.56   19.68
   4  12   9  674.95  201.46
  -4  12  -9  773.41  132.01
  -4 -12  -9  772.83  131.59
   4  12  10   80.98   48.74
  -4  12 -10  129.16   65.10
  -4 -12 -10   91.94   53.91
  -4  12 -11   64.56   52.58
   4  14 -11  347.14  105.15
   4  14 -10  423.84  121.18
  -4 -14  10  516.50  134.77
   4  14  -9   84.25   40.76
  -4 -14   9  185.40   65.83
   4  14  -8 2360.71  213.73
  -4 -14   8 2514.66  178.60
   4  14  -7 1089.37  222.82
  -4 -14   7 1196.14  145.82
   4  14  -6 6601.86  249.34
   4  14  -6 6253.11  227.08
  -4 -14   6 6085.68  228.84
   4  14  -511632.54  601.77
   4  14  -510804.95  554.13
  -4 -14   511470.07  592.67
   4  14  -4 1527.69   84.90
   4  14  -4 1421.38  178.93
  -4 -14   4 1662.33  156.89
  -4  14   3  796.16   69.16
   4  14  -3  733.39   73.78
   4  14  -3  905.94   83.87
  -4  14   3  951.70   81.81
   4 -14  -3  846.87   84.17
  -4 -14   3  933.29   91.27
  -4 -14   3  742.20  147.17
  -4  14   211011.65  358.64
   4  14  -210351.00  341.61
   4  14  -210786.12  350.53
  -4  14   211256.68  359.23
   4 -14  -210132.06  336.30
  -4 -14   210732.73  355.11
  -4 -14   2 9654.85  318.55
  -4  14   1  -12.55   16.76
   4  14  -1   37.96   23.13
   4  14  -1   87.83   26.81
  -4  14   1   34.35   12.83
   4 -14  -1   96.66   27.29
  -4 -14   1  113.31   39.58
  -4 -14   1   48.85   13.11
  -4  14   0   55.00   25.94
   4  14   0  -13.34   24.00
   4  14   0   85.13   30.24
  -4  14   0    6.03   18.61
   4 -14   0   35.60   20.70
  -4 -14   0   17.13   21.75
  -4 -14   0   53.71   21.46
  -4  14  -1 8289.91  256.81
   4  14   110793.93  304.92
   4  14   1 9126.18  261.52
  -4 -14  -1 9694.42  270.15
  -4 -14  -1 9896.17  331.85
   4 -14   1 9865.54  318.58
  -4  14  -2 1038.59  110.69
   4  14   2 1532.68   75.56
   4  14   2 1305.50  151.61
  -4 -14  -2 1206.55  168.16
  -4 -14  -2 1371.63  135.66
   4 -14   2 1438.54   55.09
   4 -14   2 1537.61   75.80
  -4  14  -3 2482.28  272.63
   4  14   3 3842.19  174.07
   4  14   3 3241.61  150.34
  -4 -14  -3 3400.38  182.89
  -4 -14  -3 3204.48  142.55
   4  14   410273.96  419.40
  -4  14  -4 9977.21  432.03
  -4 -14  -4 9762.56  388.45
  -4 -14  -410846.15  438.56
   4  14   5  145.47   43.84
  -4  14  -5  385.24   93.99
  -4 -14  -5  177.36   44.76
  -4 -14  -5  361.99   82.45
   4  14   6  273.05   74.38
  -4  14  -6  142.37   65.51
  -4 -14  -6   89.04   30.85
  -4 -14  -6   87.45   37.69
   4  14   7 3014.21  226.18
  -4  14  -7 3509.65  236.12
  -4 -14  -7 3759.52  235.90
   4  14   8  330.96  103.57
  -4  14  -8  236.10   65.28
  -4 -14  -8  218.44   67.30
   4  14   9  424.99  144.52
  -4  14  -9  355.47   89.26
  -4 -14  -9  447.33  111.97
   4  14  10  519.03  202.94
  -4  14 -10  654.37  160.33
  -4 -14 -10  629.26  156.24
   4  16 -11   55.99   42.59
   4  16 -10  420.29  156.20
  -4 -16  10  641.52  137.92
   4  16  -9  387.04  127.55
  -4 -16   9  464.94   97.38
   4  16  -8  155.04   51.08
  -4 -16   8  -28.51   29.54
   4  16  -7  279.83   92.26
  -4 -16   7  147.39   60.42
   4  16  -6   50.17   50.65
  -4 -16   6   84.21   42.10
   4  16  -5 2696.26  210.68
  -4 -16   5 2820.03  170.54
   4  16  -4 4848.24  210.88
   4  16  -4 4432.26  185.54
  -4 -16   4 4456.88  191.99
  -4  16   3   57.40   19.88
   4  16  -3   79.60   31.79
  -4  16   3   50.86   13.94
   4  16  -3   28.40   24.22
  -4 -16   3   58.40   36.34
   4 -16  -3   78.23   29.87
  -4  16   2 5211.48  239.60
   4  16  -2 5591.05  242.08
   4  16  -2 5589.88  237.48
  -4  16   2 5945.09  246.14
   4 -16  -2 5428.30  238.40
  -4 -16   2 5774.52  249.94
  -4 -16   2 5068.21  218.29
  -4  16   1  333.48   47.81
   4  16  -1  521.35   89.16
   4  16  -1  308.27   51.72
  -4  16   1  411.41   45.11
   4 -16  -1  576.00   64.11
  -4 -16   1  353.36   52.27
  -4 -16   1  328.64   61.30
  -4  16   0   55.19   24.23
   4  16   0   98.24   20.10
   4  16   0  102.40   37.50
  -4  16   0   80.15   28.34
   4 -16   0   53.92   23.86
  -4 -16   0   49.63   38.52
  -4 -16   0   94.18   25.78
  -4  16  -1 3655.36  307.60
   4  16   1 3867.41  146.49
   4  16   1 3551.17  162.14
  -4  16  -1 3932.39  155.41
   4 -16   1 3514.21  124.27
  -4 -16  -1 3824.35  191.13
  -4 -16  -1 3377.23  121.33
   4 -16   1 3603.21  125.83
  -4  16  -2 2055.16  318.35
   4  16   2 2321.05  114.72
  -4  16  -2 2130.36  101.93
  -4 -16  -2 2085.39   96.28
   4 -16   2 2039.87   90.79
  -4 -16  -2 2317.73  151.65
   4 -16   2 2150.07  115.81
   4  16   3  249.00   47.72
  -4  16  -3  285.69   50.36
  -4 -16  -3  264.87   48.65
   4 -16   3  269.39   39.42
   4 -16   3  212.96   28.95
  -4 -16  -3  377.89   67.84
   4  16   4 1750.64  202.47
  -4  16  -4 1840.00  152.96
  -4 -16  -4 1428.35  180.52
  -4 -16  -4 1847.73  223.24
   4  16   5   -2.91   26.20
  -4  16  -5   60.11   27.59
  -4 -16  -5   54.20   32.61
   4  16   6 1652.78  321.95
  -4  16  -6 2066.66  240.09
  -4 -16  -6 1847.01  236.92
   4  16   7  887.42  115.60
  -4  16  -7 1165.78  145.88
  -4 -16  -7  951.78  109.05
   4  16   8  686.09  157.07
  -4  16  -8  799.69  143.83
  -4 -16  -8  633.32  167.81
   4  16   9  210.02  112.80
  -4  16  -9  532.23  121.63
  -4 -16  -9  498.55  144.84
  -4  16 -10  357.11  109.51
  -4 -16 -10  415.41  110.36
   4  18 -10  313.83   97.92
   4  18  -9  952.88  200.91
  -4 -18   9  608.40  174.54
   4  18  -8  249.52   88.80
  -4 -18   8  119.08   40.64
   4  18  -7  311.67   66.26
  -4 -18   7  258.73   61.06
   4  18  -6   95.93   51.20
  -4 -18   6   75.07   50.06
   4  18  -5 4645.33  209.98
   4  18  -5 4014.32  151.98
  -4 -18   5 4614.59  180.85
   4  18  -4  423.27   74.57
   4  18  -4  253.31   66.85
  -4 -18   4  363.56   83.52
  -4  18   3  416.87   72.90
   4  18  -3  724.30   73.88
  -4  18   3  718.09   77.59
   4  18  -3  460.34   99.90
  -4 -18   3  672.61   98.78
  -4  18   2  728.91   65.05
   4  18  -2 1106.87  125.55
  -4  18   2 1040.82   87.93
   4  18  -2  956.71  105.66
  -4 -18   2 1080.84  151.59
   4 -18  -2  745.35   73.14
  -4  18   1  292.01   52.74
   4  18  -1  386.67   60.84
   4  18  -1  419.04   72.18
  -4  18   1  530.94   78.24
   4 -18  -1  354.70   54.44
  -4 -18   1  509.14   88.78
  -4 -18   1  298.80   58.49
  -4  18   0  292.37   58.40
   4  18   0  506.04   73.55
   4  18   0  346.59   53.76
  -4  18   0  379.45   53.59
   4 -18   0  316.28   48.93
  -4 -18   0  342.62   57.45
  -4 -18   0  403.47   74.37
  -4  18  -1 4704.31  230.90
   4  18   1 5230.56  228.75
  -4  18  -1 4971.11  244.33
  -4 -18  -1 4706.19  202.28
   4 -18   1 4547.64  194.37
  -4 -18  -1 4861.84  254.79
   4 -18   1 4716.64  199.91
  -4  18  -2   93.96   46.17
   4  18   2   60.66   34.19
  -4  18  -2   87.15   32.06
  -4 -18  -2   33.48   13.16
   4 -18   2   44.32   18.50
  -4 -18  -2   84.36   43.89
   4 -18   2   88.91   22.94
   4  18   3  195.89   51.45
  -4  18  -3  258.80   66.21
  -4 -18  -3  157.10   41.30
   4 -18   3  174.35   39.43
   4 -18   3  159.99   37.13
  -4 -18  -3  192.88   57.56
   4  18   4  786.69  145.02
  -4  18  -4  886.87   87.13
  -4 -18  -4  530.09   78.36
  -4 -18  -4  993.57  131.67
   4  18   5  781.10  111.35
  -4  18  -5  857.11  154.23
  -4 -18  -5 1001.20  141.89
   4  18   6  156.20   52.46
  -4  18  -6  220.82   84.29
  -4 -18  -6  185.42   71.98
   4  18   7 1674.00  444.79
  -4  18  -7 2315.53  174.58
  -4 -18  -7 2457.40  172.46
   4  18   8    2.83   33.60
  -4  18  -8   71.91   47.59
  -4 -18  -8   -4.61   31.87
   4  18   9  144.29  102.12
  -4  18  -9  317.19  137.16
  -4 -18  -9  321.15  115.48
  -4  18 -10  300.21  106.78
  -4 -18 -10  284.58  100.17
   4  20 -10 2777.90  380.38
   4 -20 -10 3281.63  389.00
   4  20  -9  317.47  117.05
  -4 -20   9  242.62   92.69
   4  20  -8  126.37   52.63
  -4 -20   8  158.70   66.03
   4  20  -7  146.83   39.96
  -4 -20   7   61.33   32.60
   4  20  -6  107.28   50.58
  -4 -20   6  159.34   63.05
   4  20  -5  609.46  108.76
  -4 -20   5  495.01   88.06
   4  20  -4 8616.15  316.97
  -4 -20   4 7453.46  271.90
  -4  20   3  834.95  123.85
   4  20  -3 1373.60  158.73
  -4  20   3 1504.07  119.60
  -4 -20   3 1516.20  128.24
  -4  20   2 1136.81  164.74
   4  20  -2 2188.80  261.18
  -4  20   2 1790.24  136.23
  -4 -20   2 2008.04  192.21
   4  20  -1   40.16   34.55
  -4  20   1   18.94   15.74
   4 -20  -1   71.72   32.24
  -4 -20   1  118.87   47.69
   4 -20  -1   43.17   30.40
  -4  20   0 2235.30  184.48
   4  20   0 2100.51  157.25
  -4  20   0 2086.85  153.46
   4 -20   0 2094.80  154.93
  -4 -20   0 2296.44  227.17
   4 -20   0 2025.83  153.91
  -4  20  -1 3030.12  238.22
   4  20   1 3431.48  161.32
  -4  20  -1 3474.00  171.34
   4 -20   1 3241.21  142.29
  -4 -20  -1 2966.22  235.42
   4 -20   1 3144.20  181.81
   4  20   2 7852.78  413.24
  -4  20  -2 7123.21  374.23
  -4 -20  -2 6898.12  358.01
   4 -20   2 6821.12  352.51
  -4 -20  -2 7306.25  385.96
   4 -20   2 8155.92  417.59
   4  20   3  687.41   73.09
  -4  20  -3  867.70  129.41
  -4 -20  -3  490.57  111.33
   4 -20   3  695.91   55.57
   4 -20   3  653.22   67.61
  -4 -20  -3  678.27   74.75
   4  20   4 1678.95  462.19
  -4  20  -4 1804.24  201.86
  -4 -20  -4 1769.78  193.36
   4  20   5  246.17   55.02
  -4  20  -5  292.39   66.61
  -4 -20  -5  401.34   99.40
   4  20   6 1456.29  158.22
  -4  20  -6 1617.79  166.46
  -4 -20  -6 1463.93  157.19
   4  20   7  701.57  156.50
  -4  20  -7  837.56   75.86
  -4 -20  -7  806.96  123.47
  -4  20  -8 1081.92  190.77
  -4 -20  -8 1458.95  159.83
  -4  20  -9  351.02  131.94
  -4 -20  -9  204.25   80.09
  -4  20 -10  653.08  183.78
  -4 -20 -10  473.20  133.42
   4  22 -10   60.96   37.85
   4 -22 -10  176.17   71.93
   4  22  -9  114.72   50.39
   4 -22  -9  217.51   76.93
   4  22  -8   73.75   25.78
  -4 -22   8   41.83   30.34
   4 -22  -8   39.94   37.70
   4  22  -7 3523.87  272.19
  -4 -22   7 2971.71  184.14
   4  22  -6  653.77  116.62
  -4 -22   6  575.92  125.22
   4  22  -5 1998.72  245.62
  -4 -22   5 1966.25  269.00
  -4  22   4  192.72   48.40
   4  22  -4  297.21   57.59
  -4 -22   4  466.19   76.14
  -4  22   3   79.48   36.35
   4  22  -3  170.20   58.13
  -4  22   3  110.03   27.73
  -4 -22   3  109.01   43.94
  -4  22   2 1491.55  131.54
   4  22  -2 1925.35  191.73
  -4  22   2 1941.67  187.91
  -4 -22   2 1738.32  144.71
   4 -22  -2 1817.94  246.34
  -4  22   1 2681.25  216.85
   4  22  -1 2982.03  169.14
  -4  22   1 2941.71  162.11
   4 -22  -1 2875.54  165.02
  -4 -22   1 3122.23  213.01
   4 -22  -1 3103.55  175.15
  -4  22   0  219.96   65.93
   4  22   0  300.72   74.33
  -4  22   0  361.14   83.86
   4 -22   0  229.86   59.12
  -4 -22   0  332.63   84.35
   4 -22   0  274.40   67.71
   4  22   1 1482.93  131.40
  -4  22  -1 1697.79  164.03
   4 -22   1 1463.43  120.37
  -4 -22  -1 1427.68  186.59
   4 -22   1 1356.93  146.41
   4  22   2   12.04   15.48
  -4  22  -2   54.83   36.02
   4 -22   2   41.41   22.91
  -4 -22  -2  183.81   57.49
   4 -22   2   29.96   14.84
   4  22   3  972.27  131.25
  -4  22  -3 1187.91  165.18
   4 -22   3  781.41  122.98
   4 -22   3  958.35  130.85
  -4 -22  -3 1221.38  193.13
   4  22   4 1365.37  168.17
  -4  22  -4 1170.88  142.71
  -4 -22  -4 1356.77  167.82
   4  22   5  727.39  167.99
  -4  22  -5 1154.09  135.25
  -4 -22  -5 1100.94  197.32
   4  22   6  284.27   66.73
  -4  22  -6  376.48   97.41
  -4 -22  -6  303.76   87.09
   4  22   7 3410.29  225.43
  -4  22  -7 3613.54  231.90
  -4 -22  -7 3577.41  223.70
   4  22   8   64.53   29.40
  -4  22  -8   10.85   42.91
  -4 -22  -8  244.61   97.28
  -4  22  -9 1384.22  339.92
  -4 -22  -9 1648.66  213.15
   4  24  -9  167.94   47.42
   4 -24  -9  229.14  100.75
   4  24  -8  446.83  174.64
  -4 -24   8  289.52  118.61
   4 -24  -8  399.20  144.15
   4  24  -7  204.13   55.77
  -4 -24   7  220.07   61.27
   4 -24  -7  215.60   66.87
   4  24  -6  240.93   65.99
  -4 -24   6   34.20   36.38
   4 -24  -6  266.81   68.43
   4  24  -5  186.71   46.20
  -4 -24   5  158.01   50.67
   4 -24  -5  367.05   94.15
  -4  24   4 1724.59  182.35
   4  24  -4 2954.23  294.12
  -4 -24   4 2535.89  557.40
  -4  24   3    0.61   15.48
  -4  24   3   45.82   21.02
   4  24  -3   81.84   34.77
  -4 -24   3  110.18   48.32
   4 -24  -3  151.02   60.79
  -4  24   2  225.75   74.35
   4  24  -2  488.99   83.70
  -4  24   2  428.38   77.85
  -4 -24   2  362.38   80.87
   4 -24  -2  249.26   58.28
   4  24  -1 1854.90  196.25
  -4  24   1 1963.19  103.91
  -4 -24   1 1951.56  182.54
   4 -24  -1 1825.61  206.07
  -4  24   0   73.97   54.43
   4  24   0   81.54   39.79
  -4  24   0  167.86   49.45
   4 -24   0   91.42   34.86
  -4 -24   0  207.80   71.59
   4 -24   0   93.47   37.61
   4  24   1 1318.51  195.58
  -4  24  -1 1579.80  212.00
   4 -24   1 1152.79  146.60
  -4 -24  -1 1416.17  193.01
   4 -24   1 1564.82  244.25
   4  24   2 1200.86  220.66
  -4  24  -2 1445.47  227.25
   4 -24   2 1140.76  143.56
  -4 -24  -2 1462.05  219.84
   4 -24   2 1343.07  166.35
   4  24   3  862.06  107.97
  -4  24  -3  972.01  145.62
   4 -24   3  720.42  114.38
   4 -24   3  698.24  119.33
  -4 -24  -3  968.89  144.03
   4  24   4   94.59   45.06
  -4  24  -4  272.13   84.39
   4 -24   4  171.52   46.85
   4 -24   4  264.74   63.65
  -4 -24  -4  304.80  105.14
   4  24   5  319.80   89.03
  -4  24  -5  375.48   93.94
  -4 -24  -5  613.99  109.63
   4  24   6 2140.94  154.42
  -4  24  -6 1953.62  151.68
  -4 -24  -6 2087.14  281.08
   4  24   7   59.10   31.82
  -4  24  -7  260.76   99.55
  -4 -24  -7   85.04   53.07
  -4  24  -8  540.82  139.51
  -4 -24  -8  733.27  251.48
  -4  24  -9  243.31  106.12
  -4 -24  -9  132.49   61.71
   4  26  -9   46.55   39.02
   4 -26  -9  154.62   67.60
   4  26  -8 2646.44  460.36
   4 -26  -8 2681.76  482.46
   4  26  -7  788.65  253.96
  -4 -26   7  899.03  159.32
   4 -26  -7 1146.30  214.14
   4  26  -6  632.99  166.71
  -4 -26   6  280.12  110.67
   4 -26  -6  451.13  160.08
   4  26  -5  153.77   54.58
  -4 -26   5   46.32   26.27
   4 -26  -5  117.16   68.81
  -4  26   4   92.73   25.62
   4  26  -4  254.78   64.40
  -4 -26   4  200.33   56.55
   4 -26  -4  329.70   71.58
  -4  26   3   59.86   35.46
  -4  26   3  156.67   44.00
   4  26  -3  258.76   87.62
  -4 -26   3   37.43   30.90
   4 -26  -3  151.78   54.13
   4  26  -2 2949.55  185.63
  -4  26   2 3260.34  191.72
  -4 -26   2 2895.49  258.06
   4 -26  -2 3021.27  189.01
  -4  26   1 2248.87  271.85
   4  26  -1 2778.03  176.49
  -4  26   1 3087.52  229.35
  -4 -26   1 3423.12  310.21
   4 -26  -1 2624.47  606.43
   4  26   0   65.77   38.51
  -4  26   0   60.69   33.68
  -4 -26   0    7.53   33.07
   4 -26   0   73.92   41.51
   4  26   1  803.89  190.58
  -4  26  -1 1096.02  181.94
   4 -26   1  668.88  105.02
  -4 -26  -1  869.60  125.78
   4 -26   1  930.70  113.97
   4  26   2   74.61   47.73
  -4  26  -2   33.47   30.10
  -4 -26  -2   75.83   36.34
   4 -26   2   95.45   36.93
   4  26   3 1195.18  222.32
  -4  26  -3 1648.39  170.96
  -4 -26  -3 1778.92  186.91
   4 -26   3 1438.82  181.00
   4  26   4 2625.79  177.52
  -4  26  -4 2771.93  218.00
  -4 -26  -4 3144.97  314.87
   4  26   5  513.62  136.72
  -4  26  -5  716.50  161.55
  -4 -26  -5  916.52   81.40
   4  26   6   47.31   28.03
  -4  26  -6  129.25   51.75
  -4 -26  -6  261.29   79.60
   4  26   7  119.65   60.04
  -4  26  -7  131.54   60.70
  -4 -26  -7  112.41   33.12
  -4  26  -8   88.19   69.68
  -4 -26  -8  121.39   58.50
   4  28  -8  205.81   88.37
   4 -28  -8  -34.68   40.63
   4  28  -7 1305.70  344.03
   4 -28  -7 1409.49  321.70
   4  28  -6   51.33   40.74
  -4 -28   6   -6.64   28.70
   4 -28  -6   81.63   39.78
   4  28  -5  552.93  142.22
  -4 -28   5  273.38   78.95
   4 -28  -5  475.15  109.83
   4  28  -4  315.80  112.08
  -4 -28   4  248.34   78.25
   4 -28  -4  227.60   63.80
   4  28  -3   96.49   34.38
  -4  28   3  156.00   40.31
  -4 -28   3  254.92   68.03
   4 -28  -3  252.79   70.28
  -4  28   2  -16.40   30.70
   4  28  -2   63.11   46.02
  -4  28   2    3.84   19.35
  -4 -28   2  124.67   59.45
   4 -28  -2  111.10   47.52
   4  28  -1  649.35  116.52
  -4  28   1  535.03  141.43
  -4 -28   1  623.46  124.37
   4 -28  -1  598.74  130.85
   4  28   0  648.48  142.65
  -4  28   0  614.37  104.75
  -4 -28   0  777.65  172.30
   4 -28   0  584.02  125.16
   4  28   1 1809.55  205.57
  -4  28  -1 1969.15  192.75
  -4 -28  -1 1867.92  190.65
   4 -28   1 1489.70  235.16
   4  28   2   52.91   41.49
  -4  28  -2  -10.18   41.28
  -4 -28  -2   53.60   27.93
   4 -28   2   65.66   38.51
   4  28   3   80.87   31.77
  -4  28  -3   35.87   40.92
  -4 -28  -3  291.93   80.09
   4 -28   3  127.77   36.21
   4  28   4  505.66  116.44
  -4  28  -4  710.26  154.71
  -4 -28  -4  538.05  142.63
   4  28   5 1221.29  184.25
  -4  28  -5 1239.46  186.78
  -4 -28  -5 1128.59  290.31
  -4  28  -6  288.71  112.65
  -4 -28  -6  422.96  148.84
  -4  28  -7 1504.77  254.86
  -4 -28  -7 1059.38  317.34
  -4  28  -8   44.70   45.43
  -4 -28  -8   61.12   46.22
   4  30  -7  969.18  253.54
   4 -30  -7  790.44  223.66
   4  30  -6  370.06  151.16
  -4 -30   6  258.10  104.84
   4 -30  -6  257.80  101.39
   4  30  -5  137.63   54.92
  -4 -30   5   66.61   39.32
   4 -30  -5   10.36   30.84
   4  30  -4  292.31   62.14
  -4 -30   4  164.28   48.26
   4 -30  -4  313.94   79.26
   4  30  -3  802.80  149.40
  -4  30   3  566.52  159.03
  -4 -30   3  691.56  152.06
   4 -30  -3  719.29   99.38
   4  30  -2 6228.20  385.32
  -4  30   2 6389.64  398.39
  -4 -30   2 6185.88  383.49
   4 -30  -2 5532.04  341.33
   4  30  -1  275.31   76.13
  -4  30   1  191.29   58.66
  -4 -30   1  249.28   75.49
   4 -30  -1  170.87   61.27
   4  30   0  187.17   47.82
  -4  30   0  209.23   59.16
  -4 -30   0  274.67   75.67
   4 -30   0  131.76   43.16
   4  30   1  208.60   70.04
  -4  30  -1  257.07   71.95
  -4 -30  -1   96.98   47.38
   4 -30   1  102.70   38.47
   4  30   2  172.47   58.99
  -4  30  -2  234.87   86.88
   4 -30   2  120.82   40.99
  -4 -30  -2   46.67   36.18
  -4  30  -3  493.76  113.23
   4 -30   3  215.72   58.03
  -4 -30  -3  157.64   66.80
   4  30   4 3668.46  216.58
  -4  30  -4 4795.98  315.65
  -4 -30  -4 4282.87  342.90
   4  30   5  563.36  182.83
  -4  30  -5 1129.61  256.12
  -4 -30  -5  946.07  242.73
  -4  30  -6   60.19   51.45
  -4 -30  -6   40.51   36.83
  -4  30  -7    0.49   48.10
  -4 -30  -7  203.31   74.88
   4  32  -7  140.59   67.60
   4 -32  -7  264.23   94.84
   4  32  -6  169.83   76.34
  -4 -32   6  465.03  114.22
   4 -32  -6  465.47  136.69
   4  32  -5 2475.26  204.85
  -4 -32   5 1905.49  159.81
   4 -32  -5 2143.64  255.46
   4  32  -4  237.78   91.00
  -4 -32   4  113.25   52.38
   4 -32  -4  312.72   91.94
   4  32  -3  157.53   74.75
  -4 -32   3  124.12   60.30
   4 -32  -3   63.79   44.98
  -4  32   2  114.50   40.51
   4  32  -2  254.79   80.59
  -4 -32   2  184.38   67.77
   4 -32  -2  240.36   64.77
   4  32  -1  907.56  151.04
  -4  32   1  686.89  165.46
  -4 -32   1  935.76  152.09
   4 -32  -1  792.56  121.91
   4  32   0  261.50   71.66
  -4  32   0  180.44   57.87
  -4 -32   0  358.82   92.36
   4 -32   0  164.74   54.99
   4  32   1 5200.06  301.27
  -4  32  -1 4786.48  283.25
  -4 -32  -1 4918.29  317.35
   4 -32   1 4998.18  311.66
   4  32   2  275.16   63.23
  -4  32  -2  274.40   58.28
   4 -32   2  209.82   69.85
  -4 -32  -2  306.54  107.06
   4  32   3   36.63   28.18
  -4  32  -3   88.17   47.93
  -4 -32  -3  201.05   77.58
  -4  32  -4  364.58  131.15
  -4 -32  -4  316.76  119.08
   4  32   5  177.97   75.01
  -4  32  -5   97.90   40.23
  -4 -32  -5  164.68   78.01
  -4  32  -6  213.16   88.40
  -4 -32  -6  374.61  143.14
   4  34  -6   94.76   47.84
   4 -34  -6  200.45   91.04
   4  34  -5  339.24   89.39
  -4 -34   5  168.69   61.54
   4 -34  -5  266.29   95.17
   4  34  -4  762.58  215.32
  -4 -34   4  615.06  210.15
   4 -34  -4  568.45  217.59
   4  34  -3   34.27   45.89
  -4 -34   3  129.76   79.13
   4 -34  -3   55.78   32.37
   4  34  -2 2193.36  266.41
  -4 -34   2 2754.05  233.44
   4 -34  -2 2289.42  223.98
   4  34  -1  143.76   82.42
  -4  34   1  197.22   67.31
  -4 -34   1  158.41   67.01
   4 -34  -1  193.96   68.32
   4  34   0  118.52   44.28
  -4  34   0  260.13   86.96
  -4 -34   0  183.98   74.72
   4 -34   0  178.44   63.78
   4  34   1  223.13   92.91
  -4  34  -1  384.16   99.99
  -4 -34  -1  252.41   87.95
   4 -34   1  320.47   86.38
   4  34   2  478.97  179.99
  -4  34  -2  365.19  141.87
  -4 -34  -2  277.83  126.36
   4  34   3   74.23   50.66
  -4  34  -3   50.01   45.04
  -4 -34  -3  107.64   57.89
   4  34   4  445.99  113.44
  -4  34  -4  892.46  210.28
  -4 -34  -4  918.97  265.50
  -4  34  -5  222.86   82.68
  -4 -34  -5  121.49   57.79
   4  36  -4 2455.68  445.14
  -4 -36   4 1378.15  349.34
   4 -36  -4 1980.48  430.96
   4  36  -3   84.66   43.67
  -4 -36   3   37.50   28.77
   4 -36  -3   60.73   58.44
   4  36  -2   19.25   45.79
  -4 -36   2   35.18   35.14
   4 -36  -2   -8.79   29.14
   4  36  -1  152.18   37.92
  -4 -36   1  162.36   77.58
   4 -36  -1  189.81   79.40
   4  36   0  382.63  152.66
  -4  36   0  459.66  116.65
  -4 -36   0  373.03  105.17
   4 -36   0  410.31  129.26
   4  36   1  718.84  297.27
  -4  36  -1 1345.63  276.94
   4 -36   1 1101.47  308.64
  -4 -36  -1 1562.72  310.32
   4  36   2  463.84  177.66
  -4  36  -2  643.38  164.21
  -4 -36  -2  774.47  217.32
   4  36   3   25.55   23.36
  -4 -36  -3   28.64   32.23
  -4  36  -4   52.33   37.68
  -4 -36  -4  155.11   73.24
   4  38  -2  195.54   83.65
  -4 -38   2   70.40   42.30
   4 -38  -2   90.05   52.32
   4  38  -1  388.21  135.67
  -4 -38   1  474.63  166.85
   4 -38  -1  334.85   98.99
   4  38   0  248.86   83.49
  -4  38   0  453.03  125.82
  -4 -38   0  681.82  177.17
   4 -38   0  415.36  125.50
  -4  38  -1  425.90  142.15
  -4 -38  -1  752.33  209.94
   4  38   2  176.06   79.42
  -4  38  -2  279.94   84.39
  -4 -38  -2  415.43  135.52
  -5  -1  12  104.81   68.63
  -5   1  11   31.21   34.52
  -5  -1  11   81.71   40.41
   5   1 -10 2279.86  166.66
   5  -1 -10 2112.43  147.53
  -5  -1  10 2256.31  157.11
   5   1  -9  236.76   69.90
  -5   1   9  247.78   72.58
   5  -1  -9  317.02   84.53
  -5  -1   9  257.74   93.32
   5   1  -8   89.37   42.09
   5   1  -8   33.22   23.94
  -5   1   8  151.85   58.08
   5  -1  -8    4.85   21.35
  -5  -1   8   -1.59   34.63
   5  -1  -8   53.52   20.54
   5   1  -7 1741.87  136.65
  -5   1   7 1912.57  159.62
  -5  -1   7 1367.18  147.33
   5  -1  -7 1806.18  136.66
  -5  -1   7 1712.78  146.69
   5   1  -6  713.02   67.13
  -5   1   6  675.93   64.22
  -5   1   6  856.53   91.64
   5  -1  -6  794.01   84.26
  -5  -1   6  705.18   59.19
  -5  -1   6  752.15   77.87
   5   1  -5  637.40   98.12
  -5   1   5  542.36   70.65
  -5   1   5  589.48   57.50
   5   1  -5  584.43   94.06
  -5  -1   5  613.95   72.95
   5  -1  -5  571.34   66.10
   5  -1  -5  440.47   55.24
  -5  -1   5  489.93   93.45
   5   1  -413595.85  372.45
  -5   1   414378.73  405.46
  -5   1   413466.17  367.72
   5   1  -414447.78  400.98
  -5  -1   413530.05  373.44
   5  -1  -414336.15  387.30
  -5  -1   415144.25  425.69
   5  -1  -414367.67  399.85
   5   1  -3 1201.12   90.60
   5   1  -3 1114.93   90.65
  -5   1   3 1214.11   96.00
  -5   1   3 1157.29   99.70
  -5  -1   3 1293.42   95.58
   5  -1  -3 1112.68   92.43
   5  -1  -3 1176.65   92.76
  -5  -1   3 1118.31   95.00
  -5   1   2 2531.37   93.32
   5   1  -2 2711.31   89.98
  -5   1   2 2821.58   88.38
   5   1  -2 2771.81   94.92
  -5  -1   2 2739.94   88.31
   5  -1  -2 2627.45   86.41
  -5  -1   2 2710.28  100.66
   5  -1  -2 2937.12  100.84
   5   1  -1 4911.83  104.59
   5   1  -1 5496.60  112.37
  -5   1   1 5405.44  108.11
  -5   1   1 5233.59  115.63
  -5  -1   1 5506.54  123.35
  -5  -1   1 5552.19  111.68
   5  -1  -1 4980.56  103.64
   5   1   0 3233.87   94.62
   5   1   0 3049.73   70.32
  -5   1   0 2587.48  184.76
  -5   1   0 2967.77   78.38
   5  -1   0 2497.38  154.73
   5  -1   0 2797.60  199.48
  -5  -1   0 2677.10  192.19
  -5  -1   0 2874.14   67.01
  -5   1  -1 2255.44  166.45
   5   1   1 2251.25  172.64
   5   1   1 2163.27  156.53
  -5   1  -1 2093.25  158.43
  -5  -1  -1 2403.73   97.71
  -5  -1  -1 1967.34  144.15
   5  -1   1 2100.97  163.53
   5  -1   1 2021.87  144.58
  -5   1  -221335.97  597.72
   5   1   221329.41  596.97
  -5   1  -221327.51  606.61
  -5  -1  -221789.89  610.95
   5  -1   222602.09  656.00
  -5  -1  -224509.97  694.01
   5  -1   221118.57  589.31
  -5   1  -3   60.67   12.64
   5   1   3  178.31   61.32
  -5   1  -3   98.29   25.60
   5   1   3  108.52   27.54
   5  -1   3  178.49   55.54
  -5  -1  -3   98.09   19.93
   5  -1   3   90.00   16.24
  -5  -1  -3   62.92   34.59
  -5   1  -4 1246.74  110.22
   5   1   4 1373.27   97.72
   5   1   4 1016.15  102.21
  -5   1  -4 1258.69  149.48
   5  -1   4 1207.38  129.37
  -5  -1  -4 1197.42  107.78
  -5  -1  -4 1438.83  120.06
   5  -1   4 1093.92  106.38
   5   1   5 3574.79  177.23
  -5   1  -5 4168.76  175.84
  -5  -1  -5 3968.25  179.54
   5  -1   5 3162.99  240.95
  -5  -1  -5 4012.67  172.29
   5   1   6 3208.81  236.17
  -5   1  -6 2736.97  204.92
   5  -1   6 2965.01  207.29
  -5  -1  -6 2916.91  159.78
   5   1   7   26.95   58.48
  -5   1  -7   20.94   24.63
  -5   1  -7   89.17   29.35
   5  -1   7  227.94  105.02
  -5  -1  -7   50.35   27.41
  -5  -1  -7   71.09   29.65
   5   1   8 4671.05  341.96
  -5   1  -8 4840.61  317.70
  -5  -1  -8 4771.98  319.93
   5  -1   8 4659.09  373.56
   5   1   9  170.20   94.43
  -5   1  -9    1.52    9.48
   5  -1   9  204.77   86.64
  -5  -1  -9   21.27    9.48
   5   1  10    5.77   92.88
   5  -1  10  123.34   56.43
  -5   1 -11  444.78  104.17
  -5  -3  12  286.69  233.69
   5   3 -11  460.91  215.40
  -5   3  11  984.64  199.24
   5   3 -10  519.42  124.45
  -5   3  10  412.58  190.64
   5  -3 -10  133.79   85.66
  -5  -3  10  536.04  195.72
   5   3  -9 1749.01  168.26
  -5   3   9 1417.09  250.23
   5  -3  -9 1671.82  157.80
  -5  -3   9 2017.32  209.95
  -5   3   8 2869.45  229.11
   5   3  -8 3271.47  211.15
   5  -3  -8 3147.54  182.58
  -5  -3   8 3369.21  215.91
   5  -3  -8 2592.55  573.92
  -5   3   7  959.59  102.28
   5   3  -7  794.05  144.33
   5  -3  -7  708.79   80.79
  -5  -3   7  884.43   80.31
   5  -3  -7  310.89  101.70
  -5  -3   7  883.80   93.50
   5   3  -6 2026.21  149.43
  -5   3   6 1915.24  136.34
  -5   3   6 2113.24  168.83
   5  -3  -6 1975.39  139.29
  -5  -3   6 1921.56  142.15
  -5  -3   6 1812.57  143.29
  -5   3   5 7016.43  287.39
   5   3  -5 7652.72  316.50
   5   3  -5 7613.22  321.43
  -5   3   5 7196.23  310.79
   5  -3  -5 7432.34  303.77
  -5  -3   5 6557.72  274.75
  -5  -3   5 7566.23  323.39
   5  -3  -5 6978.05  296.90
   5   3  -4 6498.39  193.85
   5   3  -4 6187.02  178.35
  -5   3   4 5663.78  159.34
  -5   3   4 6170.16  192.62
   5  -3  -4 6238.78  173.80
  -5  -3   4 6534.06  201.88
  -5  -3   4 5938.57  174.15
   5  -3  -4 5710.05  176.65
  -5   3   3  679.90   74.31
  -5   3   3  667.80   53.59
   5   3  -3  679.03   74.05
   5   3  -3  663.55   57.86
   5  -3  -3  595.31   47.56
   5  -3  -3  634.73   59.12
  -5  -3   3  842.65  133.80
  -5  -3   3  708.59   58.94
  -5   3   226922.73 1832.86
  -5   3   227477.02 1865.95
   5   3  -227194.65 1848.37
   5   3  -224161.07  677.90
   5  -3  -230661.39 2083.45
  -5  -3   225576.37  722.42
   5  -3  -226320.58  739.74
  -5  -3   225348.88  707.12
   5   3  -1 1037.70   99.88
  -5   3   1  934.19   71.48
  -5   3   1  841.32   65.08
   5   3  -1 1098.55   84.72
   5  -3  -1 1070.56   87.62
   5  -3  -1  920.20  100.52
  -5  -3   1 1288.51  137.46
  -5  -3   1  991.19   75.05
   5   3   0 7665.14  153.09
   5   3   0 7435.70  142.78
  -5   3   0 8441.49  162.73
  -5  -3   0 8540.74  168.39
   5  -3   0 8034.76  151.36
  -5  -3   0 8664.87  164.74
  -5   3  -1 9786.89  280.95
   5   3   110094.87  309.60
  -5   3  -1 9491.78  280.25
   5   3   1 9717.61  278.68
   5  -3   110595.24  327.77
   5  -3   1 9536.15  272.44
  -5  -3  -1 9457.81  275.00
  -5  -3  -1 9129.42  265.36
  -5   3  -2 2553.54   81.12
  -5   3  -2 2447.58   90.08
   5   3   2 2670.84  110.56
   5   3   2 2789.88   91.38
   5  -3   2 2991.39  130.85
  -5  -3  -2 2864.89  105.69
   5  -3   2 2746.93   85.78
  -5  -3  -2 2527.49   87.37
   5   3   3 5054.57  225.68
  -5   3  -3 3693.67  124.88
   5   3   3 4495.39  133.57
  -5   3  -3 4291.93  123.50
   5  -3   3 3980.76  151.65
  -5  -3  -3 4175.34  127.30
  -5  -3  -3 4931.32  179.60
   5  -3   3 4384.63  126.03
  -5   3  -418323.15  581.62
   5   3   417164.26  574.17
  -5   3  -415514.64  508.44
   5   3   415181.82  488.01
  -5  -3  -419322.02  624.66
   5  -3   415041.98  510.02
   5  -3   417267.36  547.33
  -5  -3  -416776.54  535.94
  -5   3  -5  229.21   34.68
   5   3   5  310.03   78.54
  -5  -3  -5  332.06   63.76
  -5  -3  -5  222.43   50.77
   5  -3   5  417.65   93.81
  -5   3  -610116.38  516.29
   5   3   6 9689.15  521.68
  -5   3  -6 9983.89  511.13
  -5  -3  -610439.85  536.14
   5  -3   611555.33  623.95
   5   3   7 3347.16  203.79
  -5   3  -7 2556.78  119.98
   5  -3   7 2796.94  439.66
  -5  -3  -7 2272.75  117.62
  -5  -3  -7 2983.72  145.37
   5   3   8 1693.29  285.67
  -5   3  -8 1359.76  128.12
  -5   3  -8 1106.99  108.42
   5  -3   8 1163.90  249.34
  -5  -3  -8 1141.64  137.51
   5   3   9  649.17  185.28
   5  -3   9  622.91  194.73
  -5  -3  -9  587.42  141.57
   5   3  10 3690.19  319.62
   5  -3  10 3772.02  326.24
   5   3  11   27.77   54.54
  -5   3 -11   -3.35   40.75
  -5  -5  12  149.61   52.32
   5   5 -11  532.27  172.36
  -5  -5  11  636.84  219.93
   5   5 -10  103.63   37.51
  -5   5  10  -19.31   39.76
  -5  -5  10   18.46   28.54
   5   5  -9 2050.84  203.17
  -5   5   9 2087.57  260.67
   5  -5  -9 2245.25  207.39
  -5  -5   9 2473.70  192.91
   5   5  -8 5713.71  331.01
  -5   5   8 5272.05  450.05
   5  -5  -8 4382.47  256.68
   5  -5  -8 5002.42  282.90
  -5  -5   8 5613.25  337.58
  -5   5   7 3005.57  142.28
   5   5  -7 3020.33  139.41
   5  -5  -7 2841.06  103.08
  -5  -5   7 2826.16  114.01
   5  -5  -7 3000.82  154.94
  -5  -5   7 2770.12  129.04
   5   5  -6 2858.80  208.67
  -5   5   6 2972.04  224.71
   5  -5  -6 2902.92  200.59
  -5  -5   6 2805.95  201.63
  -5  -5   6 3070.82  637.73
  -5   5   5 5003.73  231.69
   5   5  -5 5272.61  223.41
  -5   5   5 5224.43  214.74
   5   5  -5 4771.07  206.28
   5  -5  -5 5372.93  221.02
   5  -5  -5 5123.31  226.09
  -5  -5   5 5443.19  239.07
  -5  -5   5 4515.62  196.70
  -5   5   4   67.29   25.11
   5   5  -4  123.87   30.75
  -5   5   4  110.21   21.87
   5   5  -4  125.60   28.27
   5  -5  -4   77.05   15.13
  -5  -5   4  167.23   52.13
   5  -5  -4   58.89   20.26
  -5  -5   4  169.26   34.13
  -5   5   3 9688.73  280.86
  -5   5   3 9267.66  250.92
   5   5  -3 9704.73  270.05
   5   5  -3 9426.44  265.30
   5  -5  -310715.92  294.57
  -5  -5   3 9395.35  274.96
   5  -5  -3 8936.21  263.16
  -5  -5   310077.80  281.76
  -5   5   210102.16  300.72
  -5   5   210326.03  293.30
   5   5  -210313.33  300.38
   5   5  -210398.32  301.54
  -5  -5   2 9951.25  285.34
   5  -5  -210325.34  297.57
  -5  -5   210599.90  312.85
   5  -5  -2 8735.20  261.97
  -5   5   123489.14  663.39
  -5   5   128137.61 1912.89
   5   5  -123828.91  669.68
   5   5  -124732.22  694.23
  -5  -5   122985.07  643.22
   5  -5  -122817.86  641.27
   5  -5  -130173.91 2054.14
  -5  -5   123153.01  652.71
  -5   5   0 4788.04  148.93
  -5   5   0 4548.84  144.49
   5   5   0 4371.13  140.12
   5   5   0 4599.36  145.41
   5  -5   0 5372.93  180.22
   5  -5   0 4872.45  148.03
  -5  -5   0 4736.12  150.38
  -5  -5   0 4753.75  162.04
  -5   5  -1 2064.40  150.78
   5   5   1 2365.38  101.17
  -5   5  -1 1952.14  145.04
   5   5   1 2232.21  160.70
   5  -5   1 2186.46  183.47
  -5  -5  -1 2393.54  102.30
   5  -5   1 2059.00  147.58
  -5  -5  -1 2124.38  155.36
  -5   5  -2  244.47   33.57
   5   5   2   96.50   32.36
  -5   5  -2   49.98   25.88
   5   5   2  152.09   35.40
   5  -5   2  195.50   51.58
  -5  -5  -2  133.70   23.96
   5  -5   2  142.14   19.35
  -5  -5  -2  148.92   22.65
   5   5   3 6223.50  199.82
  -5   5  -3 7941.73  218.33
   5   5   3 7021.50  204.62
   5  -5   3 6824.48  226.01
  -5  -5  -3 6764.85  198.90
  -5  -5  -3 7115.47  205.82
   5  -5   3 7231.39  198.63
  -5   5  -4 9761.38  310.58
  -5   5  -410599.16  373.11
   5   5   411105.85  385.45
   5   5   4 8813.48  299.96
   5  -5   411116.28  409.21
  -5  -5  -4 9533.14  312.63
   5  -5   410505.97  334.54
  -5  -5  -411563.99  383.24
   5   5   5 6067.71  280.42
  -5   5  -5 6563.67  258.81
   5   5   5 5915.64  247.82
   5  -5   5 6664.62  319.09
  -5  -5  -5 7111.29  297.19
  -5  -5  -5 6414.14  266.19
  -5   5  -6    6.79    8.63
   5   5   6  112.22   76.02
  -5   5  -6   65.73   18.86
   5  -5   6  236.89   86.62
  -5  -5  -6  176.13   50.05
  -5   5  -7  546.15   83.77
   5   5   7  739.44  126.13
  -5   5  -7  633.71   94.47
   5  -5   7  790.38  244.14
  -5  -5  -7  684.25  109.61
  -5   5  -8  143.96   41.26
   5   5   8  167.21   66.63
   5  -5   8  178.13   72.60
  -5  -5  -8  187.24   47.00
   5   5   9 2780.31  298.05
   5  -5   9 2560.79  542.77
  -5  -5  -9 2851.52  182.65
   5   5  10 5087.96  422.08
  -5   5 -10 5214.29  388.81
  -5  -5 -10 5621.36 1020.27
   5   5  11  645.57  285.16
  -5   5 -11 1363.20  235.35
  -5  -7  12   34.38   30.07
   5   7 -11   97.76   34.30
  -5  -7  11   67.45   48.50
   5   7 -10  190.65   45.28
  -5   7  10  160.07   64.58
  -5  -7  10  109.59   75.34
   5   7  -9   84.56   35.49
  -5   7   9   36.57   29.50
   5  -7  -9   37.63   10.93
  -5  -7   9   28.08   38.98
   5   7  -8  559.77  121.59
  -5   7   8  601.50  141.40
   5  -7  -8  356.19   59.22
   5  -7  -8  450.35   69.89
  -5  -7   8  638.08  102.51
   5   7  -7 3570.55  152.21
  -5   7   7 4007.64  184.42
   5  -7  -7 2736.57  104.22
   5  -7  -7 3101.60  108.48
  -5  -7   7 3539.11  155.15
  -5   7   6  975.70  193.46
   5   7  -6 1143.84  144.16
   5   7  -6  661.99  105.60
   5  -7  -6  765.06   58.18
  -5  -7   6  760.43   78.77
  -5  -7   6  767.46  162.04
   5  -7  -6  411.73  114.67
  -5   7   5  315.46   68.34
   5   7  -5  427.12   81.38
   5   7  -5  298.17   42.31
  -5   7   5  235.85   37.12
   5  -7  -5  281.27   52.40
  -5  -7   5  247.53   46.24
  -5  -7   5  276.70   40.08
  -5   7   4   38.82   41.27
   5   7  -4   45.94   24.79
  -5   7   4   14.94    8.06
   5   7  -4   -6.08   15.16
   5  -7  -4   25.66   10.26
   5  -7  -4    4.84   19.29
  -5  -7   4  -11.06   27.28
  -5  -7   4   84.67   28.98
  -5   7   3   52.28    8.36
   5   7  -3  182.54   36.84
   5   7  -3  -14.23   16.86
  -5   7   3   37.09   35.31
   5  -7  -3   67.37   18.79
   5  -7  -3   22.40   18.77
  -5  -7   3   33.96   15.64
  -5  -7   3   19.87   13.27
   5   7  -2 2983.49  101.50
  -5   7   2 2699.35   84.31
   5   7  -2 3113.86  102.92
  -5   7   2 3022.13  109.44
   5  -7  -2 3590.75  157.09
  -5  -7   2 2914.65  109.40
   5  -7  -2 2905.14  102.67
  -5  -7   2 2929.23  151.40
  -5   7   1 2425.45   90.72
  -5   7   1 2418.04  103.40
   5   7  -1 2515.85  101.39
   5   7  -1 2392.78   90.67
   5  -7  -1 2741.41  204.98
   5  -7  -1 2431.28   87.22
  -5  -7   1 2204.37  177.73
  -5  -7   1 2462.87   83.39
  -5   7   0 2255.63  170.17
  -5   7   0 2076.64  153.46
   5   7   0 1898.55  166.41
   5   7   0 1973.48  143.76
   5  -7   0 1847.00  146.95
   5  -7   0 2188.40  158.07
  -5  -7   0 2387.95  121.44
  -5  -7   0 2220.13  160.79
  -5   7  -1  969.62   76.43
  -5   7  -1  650.67   60.09
   5   7   1  747.33   67.10
   5   7   1  902.65  101.56
  -5  -7  -1  974.28   77.71
   5  -7   1  799.83   80.85
   5  -7   1  952.69   90.60
  -5  -7  -1  887.77   81.96
  -5   7  -2 1017.07   76.20
  -5   7  -2 1210.63  105.80
   5   7   2 1009.19   96.00
   5   7   2  935.05   76.40
   5  -7   2 1029.75  137.86
   5  -7   2  957.86   74.54
  -5  -7  -2  949.87   93.38
  -5  -7  -2 1008.02   82.23
  -5   7  -3 1732.72   60.99
  -5   7  -3 1833.08   98.53
   5   7   3 1613.92   88.97
   5   7   3 1733.86  132.70
   5  -7   3 2042.29  134.11
  -5  -7  -3 1702.36  117.48
   5  -7   3 1633.14   57.07
  -5  -7  -3 1566.21   65.45
  -5   7  -4 6108.85  247.91
  -5   7  -4 4287.79  210.26
   5   7   4 4836.07  218.28
   5   7   4 5430.85  234.64
  -5  -7  -4 5378.45  230.75
  -5  -7  -4 5707.32  242.86
   5  -7   4 5796.14  284.15
  -5   7  -5 9925.51  385.05
   5   7   510183.77  434.35
   5   7   5 8055.14  330.73
  -5   7  -5 9994.28  388.35
   5  -7   5 8859.84  402.39
  -5  -7  -5 9128.20  377.85
  -5  -7  -5 8074.29  328.03
  -5   7  -6  320.56   66.30
   5   7   6  221.72   71.63
  -5   7  -6  283.15   61.25
   5  -7   6  386.19  120.28
  -5  -7  -6  477.72  139.00
  -5   7  -7  496.48   69.23
   5   7   7  268.67   64.60
   5  -7   7  439.51  101.66
  -5  -7  -7  494.97   99.65
  -5   7  -8   40.50   12.68
   5   7   8  200.09   87.23
   5  -7   8  197.80   87.62
  -5  -7  -8   49.89   27.98
   5   7   9 3029.83  509.51
  -5  -7  -9 3078.83  190.67
   5   7  10  506.99  221.22
  -5   7 -10  348.96  130.70
  -5  -7 -10  345.62  156.56
   5   7  11 1171.81  397.31
  -5   7 -11 1709.62  287.76
   5   9 -11  120.74   43.24
  -5  -9  11  -21.61   38.54
   5   9 -10 2463.26  203.57
  -5  -9  10 2906.58  241.68
   5   9  -9  510.75  107.61
  -5   9   9  688.93  104.67
  -5  -9   9  718.67  105.02
   5   9  -8 1659.55  261.11
  -5   9   8 1316.16  246.42
  -5  -9   8 1566.41  246.69
   5   9  -7 2751.99  143.39
  -5   9   7 2689.05  302.80
  -5  -9   7 2544.43  147.88
   5   9  -6   50.61   29.97
  -5   9   6   25.90   15.56
  -5  -9   6   34.59   26.77
   5   9  -5  198.91   42.14
  -5   9   5   76.84   28.22
  -5  -9   5   49.49   34.53
  -5  -9   5   59.36   38.60
  -5   9   4 8348.08  291.11
   5   9  -4 8159.50  284.35
  -5   9   4 7484.72  236.29
   5   9  -4 8025.19  267.37
   5  -9  -4 7009.06  225.38
   5  -9  -4 7892.53  271.14
  -5  -9   4 8305.60  288.23
  -5  -9   4 7697.55  257.96
  -5   9   3  557.84   67.00
  -5   9   3  645.57   67.69
   5   9  -3  792.62  109.95
   5   9  -3  526.49   71.78
   5  -9  -3  397.73   46.72
   5  -9  -3  562.88  122.86
  -5  -9   3  489.93   61.73
  -5  -9   3  472.28   54.64
  -5   9   2 1548.02  121.50
  -5   9   2 1654.49  118.74
   5   9  -2 1438.41  108.39
   5   9  -2 1518.16  133.96
   5  -9  -2 1457.63  137.57
   5  -9  -2 1379.46  147.25
  -5  -9   2 1631.27  172.53
  -5  -9   2 1543.56  113.98
  -5   9   113448.37  389.52
  -5   9   112555.30  360.60
   5   9  -114402.23  414.27
   5   9  -113140.46  376.48
   5  -9  -111665.53  345.27
   5  -9  -112815.23  369.95
  -5  -9   112781.95  371.75
  -5  -9   112403.66  354.92
  -5   9   0  124.59   34.26
  -5   9   0   19.17   20.02
   5   9   0  211.81   32.86
   5   9   0   48.90   18.32
   5  -9   0   82.59   30.84
   5  -9   0   74.76   15.88
  -5  -9   0   34.64   22.16
  -5  -9   0  113.09   25.15
  -5   9  -1  815.61   63.41
  -5   9  -1  966.15   84.63
   5   9   1  908.58   78.03
   5   9   1 1017.24   81.10
   5  -9   1 1274.70  176.45
   5  -9   1  977.19   87.23
  -5  -9  -1  694.45   61.11
  -5  -9  -1 1072.83  116.10
   5   9   2 9309.34  263.49
  -5   9  -2 9663.46  292.13
  -5   9  -2 9041.95  247.65
   5  -9   210079.53  322.15
   5  -9   2 9543.54  258.68
  -5  -9  -2 9471.08  269.96
  -5  -9  -2 9500.98  267.51
  -5   9  -3  227.17   24.59
  -5   9  -3  232.38   46.60
   5   9   3  322.51   53.33
   5   9   3  219.36   34.78
   5  -9   3  305.34   77.63
   5  -9   3  217.39   33.70
  -5  -9  -3  302.28   55.72
  -5  -9  -3  254.35   34.09
   5   9   4  459.02   61.91
   5   9   4  420.92   63.30
  -5  -9  -4  469.51   65.30
  -5  -9  -4  582.57   93.67
   5  -9   4  552.29  101.80
   5   9   5 3511.95  196.93
   5   9   5 4213.92  253.27
  -5  -9  -5 3849.18  209.64
  -5  -9  -5 4210.59  252.12
   5  -9   5 3988.18  254.84
   5   9   6  103.96   60.89
   5  -9   6  315.80   98.94
  -5  -9  -6  187.18   51.94
   5   9   7   -2.03   36.43
   5  -9   7  295.99  122.42
  -5  -9  -7  183.07   43.85
   5   9   8 3663.42  464.03
   5  -9   8 2630.55  441.44
  -5  -9  -8 3141.18  200.61
   5   9   9  185.32  120.44
  -5   9  -9  313.91   67.03
  -5  -9  -9  267.66   98.30
   5   9  10  117.49   53.12
  -5   9 -10  116.69   63.42
  -5  -9 -10   24.80   31.20
   5   9  11  720.36  356.51
  -5   9 -11 1005.80  181.96
  -5  -9 -11 1062.86  183.91
   5  11 -11 3011.62  386.39
  -5 -11  11 3815.48  451.69
   5  11 -10  505.08  147.15
  -5 -11  10 1037.75  186.30
   5  11  -9 1363.14  175.07
  -5 -11   9 1397.70  104.37
   5  11  -8  391.95  116.91
  -5  11   8  288.80   98.40
  -5 -11   8  275.20  116.98
   5  11  -7  632.69  127.03
  -5  11   7  404.21   88.08
  -5 -11   7  391.34   71.91
   5  11  -6 1365.82  173.58
  -5  11   6 1405.42  188.84
  -5 -11   6 1162.65  101.05
   5  11  -516534.95  653.94
  -5  11   517696.59 3644.40
   5  11  -517044.47 3507.57
  -5 -11   516382.35  651.10
   5  11  -4 1606.30   84.98
   5  11  -4 1765.57   86.83
  -5  11   4 1732.45  164.68
   5 -11  -4 1526.11   85.13
  -5 -11   4 1812.62  170.62
  -5 -11   4 1459.18  169.01
  -5  11   317418.09  583.61
  -5  11   316328.91  514.15
   5  11  -317195.92  553.93
   5  11  -316769.05  537.82
   5 -11  -317925.01  579.51
   5 -11  -315918.86  517.42
  -5 -11   316089.47  520.78
  -5 -11   317148.74  551.68
  -5  11   2  973.08  136.80
  -5  11   2 1116.01  100.45
   5  11  -2  929.68   85.12
   5  11  -2  876.93   70.01
   5 -11  -2 1207.02  121.88
   5 -11  -2  910.91   93.20
  -5 -11   2 1155.88  114.79
  -5 -11   2 1071.97   83.63
  -5  11   1  504.94   76.47
  -5  11   1  300.08   34.39
   5  11  -1  378.69   70.10
   5  11  -1  399.43   40.84
  -5 -11   1  426.18   70.35
   5 -11  -1  425.98   62.59
  -5 -11   1  366.35   50.18
   5 -11  -1  266.84   39.63
  -5  11   0  423.98   64.26
  -5  11   0  331.98   47.41
   5  11   0  396.17   68.19
   5  11   0  293.47   67.40
  -5 -11   0  420.45   55.61
   5 -11   0  249.12   30.98
   5 -11   0  294.00   60.44
  -5 -11   0  173.09   38.74
  -5  11  -132982.45 2747.45
  -5  11  -132085.74  877.44
   5  11   131108.23  838.53
   5  11   132606.78 2717.12
   5 -11   132183.50  894.48
   5 -11   130612.42  817.09
  -5 -11  -131249.22  841.80
  -5 -11  -130397.95  815.67
  -5  11  -2 3327.59  125.80
  -5  11  -2 3337.96  169.75
   5  11   2 2658.89  103.33
   5  11   2 3116.69  115.77
   5 -11   2 3531.90  379.87
   5 -11   2 2878.37   97.24
  -5 -11  -2 2958.02  116.93
  -5 -11  -2 2828.47  107.14
   5  11   3 9949.91  420.49
  -5  11  -3 8501.83  382.84
   5  11   3 8771.06  365.81
  -5 -11  -3 9471.83  391.70
   5 -11   3 9665.90  533.45
  -5 -11  -3 9372.95  391.90
   5 -11   3 7886.49  317.29
   5  11   4  478.09   80.01
   5  11   4  333.56   63.15
  -5 -11  -4  342.46   64.24
  -5 -11  -4  402.37   71.34
   5 -11   4  525.48  142.35
   5  11   5 3574.91  220.51
   5 -11   5 2689.07  434.70
  -5 -11  -5 2684.15  229.50
   5  11   6   87.21   66.23
   5 -11   6   47.07   23.77
  -5 -11  -6   73.03   31.78
   5  11   710081.98  600.63
   5 -11   7 9821.94  618.45
  -5 -11  -710941.57  639.48
   5  11   8 1491.48  367.96
  -5  11  -8 1878.37  165.27
  -5 -11  -8 2346.63  170.28
   5  11   9 2810.32  325.85
  -5  11  -9 2782.08  178.48
  -5 -11  -9 2690.87  279.35
   5  11  10  289.26  118.26
  -5  11 -10  751.84  181.32
  -5 -11 -10  318.52  143.03
   5  13 -11  606.50  173.89
  -5 -13  11  249.37  155.70
   5  13 -10 1059.01  200.75
  -5 -13  10 1120.91  220.50
   5  13  -9 1466.75  249.79
  -5 -13   9 1582.89   98.17
   5  13  -8  374.71   95.70
  -5 -13   8  471.70   94.33
   5  13  -7  242.81   67.05
  -5  13   7   79.35   41.91
  -5 -13   7  167.89   63.03
   5  13  -6 1730.32  202.94
  -5  13   6 1550.75  194.78
  -5 -13   6 1673.61  204.68
   5  13  -5 9447.83  490.08
  -5  13   5 9925.99  528.65
   5  13  -5 9872.45  509.03
  -5 -13   5 9768.51  515.73
   5  13  -4 6383.41  266.13
  -5  13   4 6774.37  293.70
  -5 -13   4 6724.56  283.38
  -5  13   3 4460.14  183.10
   5  13  -3 4926.97  214.59
  -5  13   3 5159.79  324.12
  -5  13   3 5498.62  225.07
   5  13  -3 5007.41  214.15
  -5 -13   3 4731.30  205.29
  -5 -13   3 4914.14  215.24
   5 -13  -3 5191.78  228.39
  -5  13   2   76.96   34.40
  -5  13   2   24.30    9.47
   5  13  -2   41.65   32.18
   5  13  -2   37.39   29.03
   5 -13  -2   13.05   23.56
   5 -13  -2   28.44   16.49
  -5 -13   2   59.65   46.93
  -5 -13   2  111.63   34.20
  -5  13   1  738.03  102.99
  -5  13   1  650.87   70.67
   5  13  -1  698.17   86.29
   5  13  -1  781.39   88.59
   5 -13  -1  835.85  119.45
   5 -13  -1  687.25   70.97
  -5 -13   1  845.38  126.05
  -5 -13   1  680.65  105.44
  -5  13   0 2242.42  158.09
  -5  13   0 1747.41   85.73
   5  13   0 2187.86   93.00
   5  13   0 1796.00   92.67
   5 -13   0 2036.30  221.01
   5 -13   0 1827.40  112.10
  -5 -13   0 1817.60  103.16
  -5 -13   0 1551.60   64.09
  -5  13  -1 9955.97  331.73
  -5  13  -110035.77  419.59
   5  13   110081.00  333.84
   5  13   1 9800.75  323.68
   5 -13   1 9308.40  366.92
   5 -13   1 9110.18  295.13
  -5 -13  -1 9579.28  320.34
  -5 -13  -1 9225.13  301.70
   5  13   2 7251.30  248.47
  -5  13  -2 8238.46  295.14
   5  13   2 7679.32  258.39
  -5 -13  -2 7809.07  257.84
   5 -13   2 8050.03  308.93
  -5 -13  -2 7974.03  296.14
   5 -13   2 8211.34  266.20
   5  13   3 5228.60  235.85
   5 -13   3 3937.85  220.82
  -5 -13  -3 4102.75  177.84
  -5 -13  -3 4573.82  209.90
   5 -13   3 4051.65  163.59
   5  13   4   33.41   26.26
   5 -13   4   78.16   63.55
  -5 -13  -4  163.84   43.64
  -5 -13  -4  178.52   49.42
   5  13   5   20.22   29.50
   5 -13   5  125.63   74.15
  -5 -13  -5   66.08   38.12
   5  13   6  966.63  221.71
  -5 -13  -6 1290.22  208.61
   5  13   710090.07  679.06
  -5  13  -710701.48  706.02
  -5 -13  -710077.40  663.56
   5  13   8 2307.25  294.93
  -5  13  -8 2491.87  163.26
  -5 -13  -8 2664.42  182.28
   5  13   9  648.03  175.16
  -5  13  -9  441.58  130.90
  -5 -13  -9  379.65  122.43
   5  13  10   16.39   51.10
  -5  13 -10   10.68   32.38
  -5 -13 -10  156.99   60.61
   5  15 -11   96.21   38.90
   5  15 -10 1336.93  277.65
  -5 -15  10 1398.12  133.67
   5  15  -9    8.97   36.63
  -5 -15   9  186.34   73.86
   5  15  -8  281.62   74.92
  -5 -15   8  274.01   73.43
   5  15  -7 1389.90  269.55
  -5 -15   7 1540.45  171.23
   5  15  -6   25.61   40.77
  -5 -15   6   76.18   40.48
   5  15  -5 1241.65  167.10
  -5  15   5  944.49   97.08
  -5 -15   5 1017.49   90.90
   5  15  -4 5450.18  243.66
  -5  15   4 5636.89  247.75
   5  15  -4 5063.22  210.53
  -5 -15   4 5388.90  231.86
  -5  15   3 1311.65   94.81
   5  15  -3 1128.04  106.38
  -5  15   3 1541.76  124.03
  -5  15   3 1495.48  145.52
   5  15  -3 1137.12   88.59
  -5 -15   3 1290.53  129.84
  -5  15   2  598.24   72.38
   5  15  -2  781.81  100.53
  -5  15   2  883.74  147.65
  -5  15   2 1097.21  139.39
   5  15  -2  816.94  140.18
  -5 -15   2  827.02   99.23
  -5 -15   2  929.86  115.14
   5 -15  -2  827.91  101.70
  -5  15   1 4369.66  227.75
   5  15  -1 4043.58  169.73
   5  15  -1 4261.54  151.60
  -5  15   1 4169.31  157.42
   5 -15  -1 4116.20  150.66
  -5 -15   1 4326.30  162.19
  -5 -15   1 3676.04  134.25
   5  15   0  891.01  112.67
  -5  15   0  622.51   74.49
   5  15   0  718.12   74.66
  -5 -15   0  487.96   73.45
   5 -15   0  555.17  102.65
  -5 -15   0  538.66   65.00
   5 -15   0  571.20   59.78
   5  15   1  561.31   73.07
  -5  15  -1  413.93   70.76
   5  15   1  454.78   63.22
  -5 -15  -1  454.41   57.47
   5 -15   1  507.21  127.86
  -5 -15  -1  392.89   69.90
   5 -15   1  444.99   55.51
   5  15   2 3343.84  156.46
  -5  15  -2 2737.16  204.18
   5 -15   2 2920.64  278.90
  -5 -15  -2 3141.37  144.59
   5 -15   2 3219.69  136.90
  -5 -15  -2 3154.86  182.24
   5  15   3 1767.83  258.42
   5 -15   3 1337.03  244.98
  -5 -15  -3 1185.48  136.24
   5 -15   3 1192.19   83.23
  -5 -15  -3 1150.08  112.36
   5  15   4  430.94   82.07
  -5 -15  -4  541.20   70.14
   5  15   5 2494.22  145.37
  -5  15  -5 2573.18  135.37
  -5 -15  -5 2719.58  208.46
   5  15   6  525.93  153.68
  -5  15  -6  590.33   97.72
  -5 -15  -6  449.41   98.40
   5  15   7   -1.81   38.29
  -5  15  -7  -23.71   36.95
  -5 -15  -7  196.60   61.90
   5  15   8 1770.41  179.19
  -5  15  -8 2147.86  159.01
  -5 -15  -8 1752.32  189.18
   5  15   9  610.43  189.05
  -5  15  -9  783.49  180.54
  -5 -15  -9  495.76  190.54
   5  15  10  154.89  115.70
  -5  15 -10  140.80   65.28
  -5 -15 -10  169.16   73.41
   5  17 -10  358.66  108.23
  -5 -17  10  345.64   96.26
   5  17  -9 1083.13  241.33
  -5 -17   9 1305.12  219.20
   5  17  -8  228.38   60.97
  -5 -17   8  268.63   78.06
   5  17  -7 8113.39  537.30
  -5 -17   7 7625.60  508.10
   5  17  -6  428.38  113.94
  -5 -17   6  413.69   75.82
   5  17  -5 1783.81  102.09
  -5 -17   5 1874.21  116.53
   5  17  -4  405.64  135.70
  -5 -17   4  368.82   91.95
  -5  17   3 3106.39  640.67
   5  17  -3 3153.84  144.29
  -5  17   3 3081.15  635.47
  -5 -17   3 3150.58  146.91
  -5  17   2  186.79   36.55
   5  17  -2  197.44   41.89
  -5  17   2  236.75   39.69
   5  17  -2   59.86   19.64
  -5 -17   2  215.37   54.08
   5 -17  -2  266.77   50.02
  -5  17   115682.51  625.99
   5  17  -116059.26  636.33
  -5  17   116802.31  658.83
   5 -17  -115304.06  606.28
  -5 -17   116024.83  636.66
  -5  17   0  621.30   85.38
   5  17   0 1041.18  148.70
  -5  17   0  786.83   95.71
   5 -17   0  791.85   95.96
  -5 -17   0  852.48  109.42
   5  17   1  272.85   55.49
  -5  17  -1  108.72   27.30
  -5 -17  -1  116.28   27.94
   5 -17   1  131.23   25.44
  -5 -17  -1  158.35   40.20
   5  17   2  374.70   63.17
  -5  17  -2  390.96   64.17
  -5 -17  -2  248.15   58.78
   5 -17   2  368.53   51.78
  -5 -17  -2  396.03   71.14
   5 -17   2  354.02   61.51
   5  17   3 9584.42  497.00
  -5  17  -310411.64  546.19
  -5 -17  -310296.42  541.70
   5 -17   310771.89  544.72
   5  17   4  503.15  142.60
  -5  17  -4  537.22   70.57
  -5 -17  -4  537.89   82.33
   5  17   5 6604.96  387.63
  -5  17  -5 6732.30  394.87
  -5 -17  -5 7161.02  417.43
   5  17   6    5.97   42.54
  -5  17  -6    9.37   44.63
  -5 -17  -6   62.16   49.69
   5  17   7   79.10   62.92
  -5  17  -7  283.34   89.68
  -5 -17  -7   69.18   32.07
   5  17   8  196.87   73.10
  -5  17  -8  181.44   73.10
  -5 -17  -8  174.13   56.26
  -5  17  -9 2149.22  351.56
  -5 -17  -9 1834.22  312.42
  -5  17 -10  155.53   71.91
  -5 -17 -10  -14.32   36.31
   5  19 -10   40.52   26.42
   5  19  -9   -5.08   38.29
  -5 -19   9   25.31   24.47
   5  19  -8 2555.34  302.93
  -5 -19   8 2762.69  181.58
   5  19  -7  478.59  136.54
  -5 -19   7  546.49  130.30
   5  19  -6 4117.41  254.60
  -5 -19   6 3531.18  222.60
   5  19  -5  119.63   54.50
  -5 -19   5  220.74   51.16
   5  19  -4 1107.63  156.35
  -5 -19   4  933.57   90.34
  -5  19   3   32.86   17.15
   5  19  -3  -40.38   31.17
  -5  19   3   28.23   18.03
  -5 -19   3   96.15   49.09
  -5  19   213446.81  691.70
   5  19  -213117.16  675.32
  -5  19   213580.41  693.75
  -5 -19   213954.71  720.30
  -5  19   1  835.52   84.63
   5  19  -1 1208.63  160.69
  -5  19   1  975.33   80.93
   5 -19  -1  796.56   70.45
  -5 -19   1 1181.26  160.82
  -5  19   0 4368.50  235.92
   5  19   0 5047.21  218.32
  -5  19   0 5210.18  218.41
   5 -19   0 4051.59  207.12
  -5 -19   0 5415.23  302.98
  -5  19  -1   14.67   24.01
   5  19   1  105.03   57.76
  -5  19  -1   75.17   35.80
   5 -19   1   53.67   19.00
  -5 -19  -1   14.12   27.09
   5 -19   1   61.90   22.07
   5  19   2  382.11   95.47
  -5  19  -2  382.43   91.83
   5 -19   2  244.07   56.44
  -5 -19  -2  287.27   82.59
   5 -19   2  264.07   69.32
   5  19   3  188.81   50.42
  -5  19  -3  193.55   53.89
   5 -19   3  164.55   36.64
  -5 -19  -3  238.07   67.00
   5 -19   3  112.70   27.00
   5  19   413740.51  617.89
  -5  19  -413068.87  587.67
  -5 -19  -411903.92  537.69
   5  19   5  949.34  115.16
  -5  19  -5 1139.92  136.64
  -5 -19  -5 1053.33  131.20
   5  19   6 3287.55  235.43
  -5  19  -6 4703.84  350.76
  -5 -19  -6 4084.96  283.22
   5  19   7   67.76   44.68
  -5  19  -7   43.41   43.49
  -5 -19  -7  262.27   81.76
   5  19   8 1064.75  198.59
  -5  19  -8 1104.09  204.86
  -5 -19  -8 1050.30  239.89
  -5  19  -9  920.78  223.44
  -5 -19  -9  488.29  171.38
   5  21 -10   74.31   34.50
   5  21  -9   68.84   27.67
  -5 -21   9   39.49   35.06
   5  21  -8 1805.13  165.27
  -5 -21   8 1827.48  160.56
   5  21  -7 2738.82  179.10
  -5 -21   7 2644.56  170.59
   5  21  -6 4233.08  314.42
  -5 -21   6 4324.39  298.39
   5  21  -5 2209.59  236.57
  -5 -21   5 2406.07  254.90
   5  21  -4  697.98   98.06
  -5 -21   4  854.30  115.84
  -5  21   3  391.61   59.53
   5  21  -3  439.66   74.04
  -5  21   3  576.62   89.66
  -5 -21   3  496.05  106.67
  -5  21   2 6423.30  278.63
   5  21  -2 7018.64  261.01
  -5  21   2 7160.30  252.23
  -5 -21   2 7654.67  283.00
  -5  21   1 3654.32  154.95
   5  21  -1 4062.36  162.03
  -5  21   1 4607.31  209.77
   5 -21  -1 3593.55  148.04
  -5 -21   1 4416.95  243.02
  -5  21   0 3253.53  281.54
   5  21   0 4187.30  165.11
  -5  21   0 4267.38  164.11
   5 -21   0 3826.99  150.93
  -5 -21   0 4783.62  307.72
   5 -21   0 4422.28  166.41
   5  21   1 3004.45  137.07
  -5  21  -1 3071.51  209.02
   5 -21   1 2401.18  181.64
  -5 -21  -1 2493.12  587.40
   5 -21   1 2505.26  588.13
   5  21   2  430.98  111.52
  -5  21  -2  633.70   65.69
   5 -21   2  442.73   94.86
  -5 -21  -2  591.88   88.11
   5 -21   2  454.80  109.99
   5  21   3 1101.44  146.66
  -5  21  -3  989.45  133.34
   5 -21   3  798.02  114.50
  -5 -21  -3 1297.57  209.14
   5 -21   3 1038.79  126.48
   5  21   4 3651.62  232.17
  -5  21  -4 3520.90  220.63
  -5 -21  -4 3509.02  219.08
   5  21   5 3268.82  235.59
  -5  21  -5 3020.02  257.74
  -5 -21  -5 3555.93  260.33
   5  21   6 2004.23  142.48
  -5  21  -6 2888.86  238.49
  -5 -21  -6 2906.91  214.16
   5  21   7   64.84   39.94
  -5  21  -7  207.36   50.73
  -5 -21  -7  164.87   58.62
   5  21   8  231.30  113.93
  -5  21  -8  703.67  149.56
  -5 -21  -8  421.19  179.02
  -5  21  -9  193.85   84.09
  -5 -21  -9  191.67   87.27
   5  23  -9  257.16  106.41
   5 -23  -9  438.40  117.94
   5  23  -8   80.48   32.49
  -5 -23   8   52.31   36.13
   5  23  -7  540.08  160.73
  -5 -23   7  465.77   85.72
   5  23  -6    7.31   34.41
  -5 -23   6  -15.44   33.60
   5  23  -5 1326.23  242.07
  -5 -23   5 1126.39  268.91
  -5  23   4 3242.75  190.75
   5  23  -4 4065.33  251.69
  -5 -23   4 4232.40  334.76
  -5  23   3  450.92  107.78
   5  23  -3 1139.20  203.32
  -5  23   3  985.00  134.44
  -5 -23   3  864.68  112.15
  -5  23   2   51.87   31.73
   5  23  -2  106.53   47.11
  -5  23   2  161.06   46.89
  -5 -23   2  180.88   74.55
  -5  23   1  370.07   71.77
   5  23  -1  870.29  126.71
  -5  23   1  997.80  159.50
  -5 -23   1  877.46  124.22
   5 -23  -1  793.18  148.12
  -5  23   0  596.04   97.91
   5  23   0  730.38  186.30
  -5  23   0  840.32  126.11
   5 -23   0  645.19   88.95
  -5 -23   0  790.16  132.56
   5 -23   0  862.91  113.94
   5  23   1  946.96  146.89
  -5  23  -1 1083.58  174.31
   5 -23   1  990.22  128.82
  -5 -23  -1  939.26  126.60
   5 -23   1  882.72  149.51
   5  23   212016.64 2582.15
  -5  23  -211564.52  657.62
   5 -23   210943.98  616.51
  -5 -23  -211396.27  652.03
   5 -23   212323.60 2645.48
   5  23   3    7.40   21.00
  -5  23  -3   86.27   54.13
   5 -23   3   -6.58    7.51
  -5 -23  -3  128.43   66.13
   5  23   4   99.08   49.35
  -5  23  -4   76.68   41.22
  -5 -23  -4   98.67   43.39
   5  23   5  458.10  119.02
  -5  23  -5  637.00   91.80
  -5 -23  -5  665.17  108.60
   5  23   6  278.53   80.76
  -5  23  -6  644.21  149.14
  -5 -23  -6  731.49   80.83
   5  23   7  499.37  193.66
  -5  23  -7 1123.13  198.40
  -5 -23  -7  873.30  203.37
   5  23   8 1459.69  266.64
  -5  23  -8 2208.63  383.24
  -5 -23  -8 2309.88  376.15
  -5  23  -9  -39.55   53.76
  -5 -23  -9   59.15   45.18
   5  25  -9   19.09   44.82
   5 -25  -9  130.70   60.67
   5  25  -8  197.80   78.97
  -5 -25   8  -10.51   31.74
   5 -25  -8   87.29   34.61
   5  25  -7   72.73   46.42
  -5 -25   7   36.02   29.36
   5 -25  -7   40.42   38.22
   5  25  -6  249.85   70.96
  -5 -25   6  423.20  102.84
   5  25  -5  212.47   72.33
  -5 -25   5  147.14   55.64
   5  25  -4 7620.25  507.28
  -5 -25   4 7141.41  475.11
   5 -25  -4 8187.81  543.82
  -5  25   3   -1.57   13.16
   5  25  -3   54.59   47.28
  -5  25   3   19.24   10.12
  -5 -25   3   89.50   54.16
   5 -25  -3   63.05   43.04
   5  25  -2 1692.96  265.50
  -5  25   2 1731.13  217.30
  -5 -25   2 1792.04  254.36
   5 -25  -2 1551.15  193.10
  -5  25   1   -2.28   16.97
   5  25  -1  140.56   46.85
  -5  25   1  228.30   47.66
  -5 -25   1  227.46   71.35
   5 -25  -1   37.04   32.74
   5  25   0  451.00  104.17
  -5  25   0  490.43   96.25
   5 -25   0  320.89   59.56
  -5 -25   0  468.17   83.80
   5 -25   0  641.46  116.30
   5  25   1  603.47  106.72
  -5  25  -1  748.40  124.19
  -5 -25  -1  850.48  114.47
   5 -25   1  687.37  104.84
   5  25   2 5376.52  343.54
  -5  25  -2 6025.76  356.57
  -5 -25  -2 5819.65  419.71
   5  25   3   42.86   41.39
  -5  25  -3   98.30   40.91
   5 -25   3   -1.75    8.57
  -5 -25  -3    6.26   34.27
   5  25   4  391.52   96.62
  -5  25  -4  376.71  104.03
  -5 -25  -4  516.54   86.83
   5  25   5  107.06   41.20
  -5  25  -5  163.46   79.70
  -5 -25  -5  264.38   85.79
   5  25   6 2482.01  204.28
  -5  25  -6 2643.39  304.64
  -5 -25  -6 2828.07  254.31
   5  25   7   77.59   52.11
  -5  25  -7   35.00   46.65
  -5 -25  -7  100.99   53.03
  -5  25  -8 3424.71  466.92
  -5 -25  -8 3197.51  426.93
   5  27  -8  959.86  361.44
   5 -27  -8 1636.97  376.53
   5  27  -7  105.77   56.10
  -5 -27   7   50.58   34.41
   5 -27  -7   92.45   28.76
   5  27  -6 1421.89  301.85
  -5 -27   6 1100.23  263.38
   5 -27  -6 1607.91  150.16
   5  27  -5 3590.76  296.17
  -5 -27   5 3381.16  214.33
   5 -27  -5 3861.72  245.04
   5  27  -4  328.74  100.70
  -5 -27   4  367.11  103.22
   5 -27  -4  330.64   81.36
   5  27  -3 1665.26  216.58
  -5  27   3 1712.66  161.20
  -5 -27   3 1670.18  180.47
   5 -27  -3 1386.05  150.14
   5  27  -2 2524.31  186.08
  -5  27   2 2678.44  186.93
  -5 -27   2 2507.95  244.77
   5 -27  -2 2410.26  230.73
  -5  27   1   73.76   42.37
   5  27  -1  225.16   54.88
  -5  27   1   74.38   33.24
  -5 -27   1  198.62   65.31
   5 -27  -1  138.75   57.39
   5  27   0 1103.86  290.94
  -5  27   0 1515.39  191.63
  -5 -27   0 1470.25  203.90
   5 -27   0 1397.34  185.65
   5  27   1 4133.68  290.70
  -5  27  -1 3886.93  304.89
   5 -27   1 2448.95  266.04
  -5 -27  -1 4317.79  393.28
   5 -27   1 4032.85  269.51
   5  27   2  750.81  174.89
  -5  27  -2 1014.80  117.73
  -5 -27  -2 1157.76  126.09
   5 -27   2 1294.49  128.68
   5  27   3  830.62  101.69
  -5  27  -3 1200.68  158.68
   5 -27   3  739.68  111.52
  -5 -27  -3 1134.89  133.56
   5  27   4 1655.60  287.85
  -5  27  -4 1387.28  233.67
  -5 -27  -4 1987.66  246.09
   5  27   5   52.15   32.55
  -5  27  -5  141.39   43.36
  -5 -27  -5  227.64   58.75
   5  27   6  426.30  154.15
  -5  27  -6  599.67  184.88
  -5 -27  -6  784.68  172.77
  -5  27  -7 4465.00  523.50
  -5 -27  -7 4297.49  545.96
   5 -29  -8  264.49   97.81
   5  29  -7  302.73   95.79
  -5 -29   7  192.30   71.56
   5 -29  -7  340.69  107.96
   5  29  -6  101.38   48.98
  -5 -29   6  139.06   53.32
   5 -29  -6  165.67   59.96
   5  29  -5  720.24  183.66
  -5 -29   5  762.77  140.22
   5 -29  -5  735.30  164.23
   5  29  -4 3050.36  192.75
  -5 -29   4 2841.44  180.92
   5 -29  -4 2730.82  219.37
  -5  29   3  126.70   33.24
   5  29  -3  102.88   39.59
  -5 -29   3   34.73   45.12
   5 -29  -3  162.61   64.79
   5  29  -2 1409.84  198.53
  -5  29   2 1220.49  171.82
  -5 -29   2 1094.43  194.84
   5 -29  -2 1095.77  195.08
   5  29  -1 2390.22  170.36
  -5  29   1 2502.19  175.91
  -5 -29   1 2241.76  158.52
   5 -29  -1 2187.15  196.41
   5  29   0  159.77   59.00
  -5  29   0  115.96   41.53
  -5 -29   0  324.15  101.18
   5 -29   0  215.79   65.68
   5  29   1  815.12  109.44
  -5  29  -1  744.36  130.68
  -5 -29  -1  883.72  138.91
   5 -29   1  678.01  109.47
   5  29   2  738.39   95.78
  -5  29  -2  841.93  175.61
  -5 -29  -2 1015.02  134.88
   5 -29   2  772.08  120.32
   5  29   3 1229.62   81.91
  -5  29  -3 1215.36  155.96
  -5 -29  -3 1223.67  213.46
   5  29   4 1408.26  202.61
  -5  29  -4 1710.03  125.44
  -5 -29  -4 1945.79  142.13
   5  29   5  255.01  117.89
  -5  29  -5  707.06  159.57
  -5 -29  -5  316.37  161.21
   5  29   6  -11.04   35.00
  -5  29  -6  188.17   82.12
  -5 -29  -6   43.89   60.13
  -5  29  -7 1676.34  290.74
  -5 -29  -7 1105.74  260.59
   5  31  -7 2550.84  454.53
   5 -31  -7 2259.24  402.24
   5  31  -6  570.89  239.37
  -5 -31   6  591.19  149.20
   5 -31  -6  783.65  245.97
   5  31  -5  143.59   54.60
  -5 -31   5   48.33   28.74
   5 -31  -5   23.14   36.24
   5  31  -4   88.39   24.62
  -5 -31   4  119.39   56.50
   5 -31  -4   25.29   32.13
   5  31  -3  236.46   83.26
  -5 -31   3  324.87   82.36
   5 -31  -3  133.35   49.72
   5  31  -2  794.38  139.24
  -5  31   2  631.61  102.22
  -5 -31   2  543.04  137.58
   5 -31  -2  491.35  116.36
   5  31  -1 5161.88  302.91
  -5  31   1 5023.05  281.71
  -5 -31   1 5237.38  306.68
   5 -31  -1 4689.72  267.91
   5  31   0  478.84  118.50
  -5  31   0  722.87   86.12
  -5 -31   0  569.81  106.01
   5 -31   0  460.57  113.96
   5  31   1   59.47   38.12
  -5  31  -1   60.24   37.04
  -5 -31  -1   36.46   38.74
   5 -31   1   27.55   26.07
   5  31   2  105.49   56.94
  -5  31  -2  240.61   82.34
  -5 -31  -2   84.05   42.27
   5 -31   2  120.71   37.68
   5  31   3  161.65   73.25
  -5 -31  -3  430.24  116.26
   5  31   4  595.92  269.21
  -5  31  -4 1209.60  370.47
  -5 -31  -4 1530.60  286.93
   5  31   5 1854.53  308.52
  -5  31  -5 1271.86  403.12
  -5 -31  -5 2044.46  358.80
  -5  31  -6  410.81  138.09
  -5 -31  -6  596.00  166.23
   5  33  -6  227.44   70.38
  -5 -33   6  126.57   70.83
   5 -33  -6  229.44   96.46
   5  33  -5  418.87  147.46
  -5 -33   5  549.96  140.46
   5 -33  -5  428.27  140.68
   5  33  -4 2218.98  448.31
  -5 -33   4 1729.50  312.47
   5 -33  -4 1950.80  370.23
   5  33  -3  775.15  178.04
  -5 -33   3  930.21  187.53
   5 -33  -3  904.20  210.50
   5  33  -2   -4.99   49.08
  -5 -33   2   74.59   43.34
   5 -33  -2   10.68   29.60
   5  33  -1 4817.67  378.02
  -5  33   1 5110.47  383.84
  -5 -33   1 4730.12  379.21
   5 -33  -1 4426.44  400.05
   5  33   0 1023.41  175.39
  -5  33   0  745.35  203.05
  -5 -33   0  925.80  195.19
   5 -33   0  554.53  161.47
   5  33   1  238.71   87.94
  -5  33  -1  279.11   74.55
  -5 -33  -1  289.83   93.63
   5 -33   1  121.52   51.58
   5  33   2 2085.59  194.94
  -5  33  -2 1758.07  180.36
  -5 -33  -2 1775.50  220.83
   5  33   3 1655.30  283.12
  -5  33  -3 1432.97  373.05
  -5 -33  -3 1538.01  389.03
   5  33   4   91.62   42.34
  -5  33  -4  300.40   96.56
  -5 -33  -4  191.17   77.31
  -5  33  -5 3839.39  624.81
  -5 -33  -5 4164.75  695.52
   5  35  -5  342.14  147.28
  -5 -35   5  333.61  127.64
   5 -35  -5  629.68  193.32
   5  35  -4   46.22   50.60
  -5 -35   4  124.66   59.93
   5 -35  -4  -24.10   29.78
  -5 -35   3 2020.68  251.82
   5 -35  -3 1734.00  217.63
   5  35  -2 1412.10  376.64
  -5 -35   2 1629.70  387.61
   5 -35  -2 1584.55  319.40
   5  35  -1   92.48   40.02
  -5  35   1  150.52   45.36
  -5 -35   1  157.08   66.29
   5 -35  -1   80.16   44.02
   5  35   0  427.05  142.89
  -5  35   0  743.63  175.76
  -5 -35   0  755.98  188.03
   5 -35   0  509.98  164.83
  -5  35  -1 2823.78  498.11
  -5 -35  -1 3229.59  558.50
   5  35   2   83.55   41.19
  -5  35  -2   61.23   44.08
  -5 -35  -2  108.81   76.84
   5  35   3  181.63   71.42
  -5 -35  -3  202.98   90.93
  -5  35  -4  540.17  186.43
  -5 -35  -4  533.81  188.50
  -5 -37   3  222.13   76.27
   5 -37  -3  234.39   76.18
   5  37  -2   64.72   36.83
  -5 -37   2  -27.04   40.17
   5 -37  -2   10.62   33.83
   5  37  -1  136.04   65.06
  -5 -37   1  136.57   62.32
   5 -37  -1  102.93   51.80
   5  37   0  158.09   52.83
  -5  37   0  115.08   47.43
  -5 -37   0  201.15  100.61
   5 -37   0   45.61   27.06
   5  37   1  615.34  263.43
  -5  37  -1 1109.14  238.95
  -5 -37  -1 1393.88  270.14
   5  37   2  180.50   74.99
  -5  37  -2  309.51  111.12
  -5 -37  -2  323.94  111.15
  -6   0  12   11.35   30.19
  -6   0  11   70.02   53.50
   6   0 -1014024.78  749.17
  -6   0  1015073.60  216.24
   6   0  -9   44.17   24.64
  -6   0   9   -9.30   38.79
   6   0  -8 1020.71  175.99
   6   0  -8 2579.05  519.81
  -6   0   8 2364.84  257.62
   6   0  -7   46.87   17.91
  -6   0   7   68.01   33.48
  -6   0   7   79.87   50.03
   6   0  -6  641.84  103.16
  -6   0   6  568.33   97.10
  -6   0   6  720.94   88.93
   6   0  -5   33.32   15.19
  -6   0   5   30.39   17.07
  -6   0   5   33.13   20.43
   6   0  -443454.84 1366.09
  -6   0   440076.56 1260.81
  -6   0   441995.06 1332.43
   6   0  -440950.82 1295.42
   6   0  -3   54.24   25.60
  -6   0   3   12.30    8.16
  -6   0   3   57.06   26.50
   6   0  -3   56.45   19.49
   6   0  -2 1535.62  114.14
  -6   0   2 1522.27  111.38
  -6   0   2 1746.41  162.50
   6   0  -2 1540.73  121.51
   6   0  -1   23.60   32.09
  -6   0   1   70.88   33.95
   6   0  -1    3.91   20.93
   6   0   0 1847.93  155.57
  -6   0   0 1465.80  109.22
  -6   0   0 1866.19  139.67
   6   0   0 1681.32  124.25
   6   0   1   46.01   26.02
  -6   0  -1   15.89   14.37
  -6   0  -1   26.60   15.63
   6   0   1    8.74   13.62
   6   0   224842.07  718.03
  -6   0  -224171.15  660.88
  -6   0  -220560.03  556.35
   6   0   220947.87  563.87
   6   0   3   31.91   39.84
  -6   0  -3   50.58   23.98
  -6   0  -3   62.24   21.72
   6   0   3    2.54   12.21
   6   0   4  611.01   97.63
  -6   0  -4  693.71   88.56
   6   0   4  540.22   68.28
   6   0   5   49.35   41.80
  -6   0  -5   31.92   15.16
   6   0   5   12.10   12.36
   6   0   6 3904.35  186.81
  -6   0  -6 5069.29  195.36
   6   0   7  159.72   71.26
  -6   0  -7   24.38   23.49
  -6   0  -7   58.55   31.75
   6   0   8 8068.50  528.43
  -6   0  -8 8081.55  480.55
   6   0   9   58.25   41.45
  -6   0  -9   41.53   20.91
   6   0  10  168.18   89.55
   6   0  11   12.86   56.14
  -6   2  11  128.75   41.29
  -6  -2  11  107.82   82.21
   6   2 -10 1190.40  168.98
  -6   2  10 1103.98  264.63
  -6  -2  10  594.91  260.85
   6  -2 -10 1024.49  144.31
   6   2  -9 3742.66  231.38
  -6   2   9 3929.41  262.59
   6  -2  -9 3851.15  233.54
  -6  -2   9 3944.93  259.12
  -6   2   8  214.32   73.53
   6   2  -8  325.15   87.73
   6  -2  -8  233.78   63.72
  -6  -2   8  162.67   55.50
   6  -2  -8   40.95   29.07
  -6  -2   8  256.92   79.95
   6   2  -7  347.02   70.75
  -6   2   7  278.68   42.02
  -6   2   7  243.11   64.55
   6  -2  -7  334.95   79.92
  -6  -2   7  271.10   46.22
  -6  -2   7  410.20   79.94
   6   2  -6  227.08   54.29
  -6   2   6  231.96   67.19
  -6   2   6  157.10   46.80
  -6  -2   6  171.29   45.96
  -6  -2   6  258.97   74.25
   6  -2  -6  157.49   41.47
  -6   2   5  972.23  111.64
   6   2  -5 1282.18  146.00
  -6   2   5 1159.12  143.07
   6  -2  -5 1092.18  124.18
  -6  -2   5 1101.60  136.29
  -6  -2   5  907.23  161.57
   6   2  -4 8113.03  273.68
   6   2  -4 7654.40  251.33
  -6   2   4 8008.21  260.32
  -6   2   4 7924.96  274.19
   6  -2  -4 8252.48  269.25
  -6  -2   4 8677.21  297.44
  -6  -2   4 7982.26  265.27
   6  -2  -4 7919.32  267.52
  -6   2   3 9601.68  280.54
   6   2  -3 9630.56  269.05
  -6   2   3 8807.92  243.50
   6   2  -3 8370.74  239.12
  -6  -2   3 9005.64  250.12
   6  -2  -3 8409.01  235.12
  -6  -2   3 8833.88  259.01
   6  -2  -3 9167.52  263.94
  -6   2   2  416.63   51.45
   6   2  -2  425.36   70.40
  -6   2   2  352.52   50.96
   6   2  -2  224.66   48.27
  -6  -2   2  332.73   33.69
   6  -2  -2  352.52   61.85
  -6  -2   2  457.99   58.16
   6  -2  -2  324.35   36.16
   6   2  -1  383.24   40.43
   6   2  -1  362.53   40.77
  -6   2   1  421.19   68.37
  -6   2   1  463.23   61.90
   6  -2  -1  431.44   50.98
  -6  -2   1  514.49   57.13
  -6  -2   1  352.31   64.66
   6  -2  -1  311.23   33.80
   6   2   0 1318.34  107.24
   6   2   0 1203.31   92.86
  -6   2   0 1001.81   77.67
  -6   2   0 1206.22  116.99
  -6  -2   0  986.59   87.40
   6  -2   0  974.38   84.80
   6  -2   0 1188.92  127.14
  -6  -2   0 1074.34   84.30
  -6   2  -1 7631.28  224.88
   6   2   1 7615.79  231.03
   6   2   1 7582.40  213.63
  -6   2  -1 7029.32  202.45
   6  -2   1 8075.01  227.69
  -6  -2  -1 7545.61  215.68
  -6  -2  -1 7385.02  213.31
  -6   2  -2 2519.69   82.68
  -6   2  -2 2654.38  101.00
   6   2   2 2317.72   90.69
   6   2   2 2572.28   85.66
   6  -2   2 2990.18  131.44
  -6  -2  -2 2709.27   93.59
   6  -2   2 2739.32   84.75
  -6  -2  -2 1845.23  161.07
   6   2   3  989.39   91.53
   6   2   3  787.31   86.13
  -6   2  -3  735.40   85.42
  -6   2  -3  966.37   98.53
   6  -2   3 1292.98  247.27
  -6  -2  -3  985.00   94.28
  -6  -2  -3 1040.97  152.22
   6  -2   3  836.87   87.06
   6   2   4   97.52   44.98
   6   2   4  129.97   34.40
  -6   2  -4  249.98   36.32
  -6  -2  -4  221.37   45.22
  -6  -2  -4  217.29   39.07
   6  -2   4   74.69   41.84
   6  -2   4  199.39   31.17
   6   2   5  244.49   91.90
   6   2   5   73.81   36.69
  -6   2  -5   49.32   24.92
  -6  -2  -5   23.33   22.35
   6  -2   5   48.14   18.86
   6  -2   5   99.04   44.31
   6   2   6   81.00   48.64
  -6   2  -6  103.33   28.28
   6  -2   6  426.39  145.38
  -6  -2  -6   22.44   17.80
   6   2   7 3911.48  297.82
   6  -2   7 3545.68  307.79
  -6  -2  -7 3726.14  224.47
   6   2   8 1112.17  152.38
  -6   2  -8  951.88   96.45
  -6  -2  -8  781.43  109.48
   6  -2   8 1090.66  248.51
   6   2   9   78.05   68.05
   6  -2   9  217.20   88.29
  -6  -2  -9  106.10   44.49
   6   2  10  -22.14   77.08
   6  -2  10   78.98   46.24
   6   2  11  108.65   46.58
   6   4 -11   86.59   40.09
  -6   4  11   54.50   30.17
  -6  -4  11   74.73   52.59
   6   4 -10   83.16   35.47
  -6   4  10   50.75   39.21
  -6  -4  10  180.49   83.52
   6   4  -9  410.68  116.88
  -6   4   9  417.09  133.66
  -6  -4   9  457.99  109.28
   6  -4  -9  385.77  115.50
   6   4  -8  520.34  173.68
  -6   4   8  404.54  173.89
   6  -4  -8  247.55  104.01
   6  -4  -8  642.99  168.45
  -6  -4   8  715.74   99.28
   6   4  -7   59.37   24.82
  -6   4   7    6.43   36.23
   6  -4  -7   41.13   18.82
  -6  -4   7   89.90   42.30
  -6  -4   7   81.14   38.19
  -6   4   6 2539.16  187.86
   6   4  -6 2553.51  201.36
  -6   4   6 2733.33  219.37
   6  -4  -6 2667.45  197.27
  -6  -4   6 2604.40  210.77
  -6   4   5  755.98   96.04
   6   4  -5  886.65  118.80
  -6   4   5  833.14   85.30
   6  -4  -5  708.26   82.27
  -6  -4   5  964.37   93.48
  -6  -4   5  610.99   94.35
  -6   4   4  135.47   44.34
   6   4  -4   85.90   20.02
  -6   4   4  168.36   31.04
   6   4  -4  187.32   30.42
  -6  -4   4  161.17   27.29
   6  -4  -4  143.53   26.48
  -6  -4   4  165.58   40.13
   6  -4  -4  166.00   28.09
  -6   4   3  615.69   77.91
   6   4  -3  581.87   86.06
  -6   4   3  612.45   71.61
   6   4  -3  479.12   47.20
   6  -4  -3  602.38   54.93
   6  -4  -3  515.24   52.92
  -6  -4   3  528.40   57.23
  -6  -4   3  534.68   89.26
  -6   4   2  567.78   59.21
  -6   4   2  502.84   42.41
   6   4  -2  560.55   71.35
   6   4  -2  508.22   51.39
   6  -4  -2  446.96   48.78
  -6  -4   2  455.23   49.10
   6  -4  -2  493.81   48.02
  -6  -4   2  537.58   78.47
  -6   4   1   29.65   31.39
   6   4  -1   29.97   18.70
  -6   4   1   34.84   15.02
   6   4  -1   28.93   12.12
  -6  -4   1   -3.56   13.57
   6  -4  -1   -1.62   17.20
   6  -4  -1   -6.29   19.14
  -6  -4   1   58.22   31.03
  -6   4   0  118.28   30.91
  -6   4   0  136.14   26.29
   6   4   0  102.02   25.26
   6   4   0   77.65   19.22
   6  -4   0  122.09   46.10
  -6  -4   0  154.72   31.51
   6  -4   0  139.94   22.56
  -6  -4   0  196.70   32.15
  -6   4  -1 7176.94  205.56
   6   4   1 7467.51  227.25
  -6   4  -1 7066.23  210.46
   6   4   1 6894.63  196.92
   6  -4   1 7317.02  236.79
   6  -4   1 6870.42  195.30
  -6  -4  -1 7172.73  208.25
  -6  -4  -1 6799.56  196.94
  -6   4  -2   75.05   19.07
  -6   4  -2   50.25   32.24
   6   4   2   33.85   26.98
   6   4   2   91.77   23.31
   6  -4   2  106.54   45.40
  -6  -4  -2   68.30   27.36
   6  -4   2   55.05   15.25
  -6  -4  -2   39.53   28.41
  -6   4  -3   41.28   19.91
  -6   4  -3  119.45   30.23
   6   4   3  127.04   41.08
   6   4   3   -7.41   16.87
  -6  -4  -3   83.26   26.55
  -6  -4  -3   64.19   33.45
   6  -4   3   55.76   37.65
   6  -4   3   -1.35   10.82
   6   4   4 3866.90  165.68
   6   4   4 4644.60  227.51
  -6   4  -4 4314.09  174.87
  -6  -4  -4 4015.54  171.74
   6  -4   4 3995.47  204.76
   6  -4   4 3544.70  145.19
  -6   4  -5   27.51   12.90
   6   4   5   50.61   45.31
   6  -4   5   30.58   48.80
  -6  -4  -5   79.24   35.84
  -6   4  -6    1.66   10.77
   6   4   6   43.39   40.51
  -6   4  -6   49.06   18.48
   6  -4   6  182.49  119.95
  -6  -4  -6   31.55   18.80
  -6   4  -7 2732.92  163.39
   6   4   7 1962.29  224.93
   6  -4   7 2797.98  450.04
  -6  -4  -7 2559.97  516.63
   6   4   8  335.28   92.07
  -6   4  -8  331.52   65.91
   6  -4   8  378.79  135.27
  -6  -4  -8  341.87   87.95
   6   4   9  192.20   81.47
   6  -4   9  248.51  132.29
  -6  -4  -9  103.76   44.70
   6   4  10 1231.99  410.00
   6  -4  10 1355.39  343.84
   6   4  11   82.02   87.13
  -6   4 -11  231.25   68.12
   6   6 -11  172.17   67.71
  -6   6  11  292.86  104.91
   6   6 -10   74.32   31.89
  -6   6  10   47.70   49.25
  -6  -6  10   40.91   45.27
  -6   6   9  -24.09   41.00
   6   6  -9   32.93   17.35
   6  -6  -9   16.85   13.03
  -6  -6   9  163.77   73.13
   6   6  -8 3120.01  190.11
  -6   6   8 3073.33  281.94
   6  -6  -8 2546.98  514.88
   6  -6  -8 3011.16  174.38
  -6  -6   8 3306.63  218.40
   6   6  -7 4585.37  213.94
  -6   6   7 4719.62  250.25
   6  -6  -7 3687.90  177.78
   6  -6  -7 4252.57  189.58
  -6  -6   7 4434.77  220.31
  -6   6   6 7169.89  388.78
   6   6  -6 7395.01  383.70
  -6   6   6 7465.31  380.18
  -6  -6   6 6242.86  328.36
   6  -6  -6 6785.56  346.50
  -6  -6   6 7443.95  395.54
  -6   6   5  314.04   69.54
   6   6  -5  300.25   86.97
  -6   6   5  241.76   34.64
  -6  -6   5  270.59   65.35
   6  -6  -5  320.20   46.70
  -6  -6   5  170.31   52.02
  -6   6   4  128.20   46.07
   6   6  -4  109.65   26.50
  -6   6   4   78.00   16.94
   6   6  -4   85.47   27.73
  -6  -6   4   58.80   22.62
   6  -6  -4   84.31   19.79
   6  -6  -4   -1.71   17.96
  -6  -6   4   44.71   28.25
  -6   6   3   86.78   30.01
  -6   6   3  218.39   30.95
   6   6  -3  247.88   46.78
   6   6  -3  166.55   32.09
   6  -6  -3  193.43   31.70
  -6  -6   3  197.06   33.65
   6  -6  -3  119.28   33.06
  -6  -6   3  149.69   25.26
  -6   6   226224.22  713.78
   6   6  -227692.75  749.56
  -6   6   225802.32  690.37
   6   6  -224073.18  651.13
   6  -6  -224733.15  669.01
  -6  -6   228741.74  779.52
   6  -6  -225961.49  702.98
  -6  -6   226245.10  705.42
  -6   6   1 2527.14   93.79
  -6   6   1 2115.08   83.83
   6   6  -1 2420.08   97.38
   6   6  -1 2149.51   80.08
   6  -6  -1 2676.24  120.47
   6  -6  -1 2389.45   83.63
  -6  -6   1 2064.83   80.25
  -6  -6   1 2492.66   89.38
  -6   6   010299.39  291.07
  -6   6   010155.19  289.89
   6   6   0 9515.22  270.28
   6   6   0 9524.97  266.81
   6  -6   0 9710.26  291.11
   6  -6   010381.65  293.35
  -6  -6   010357.19  308.61
  -6  -6   0 9439.34  264.67
  -6   6  -1  247.36   35.01
   6   6   1  336.68   55.68
  -6   6  -1  299.33   43.47
   6   6   1  264.98   43.08
   6  -6   1   85.63   37.05
  -6  -6  -1  235.65   40.40
   6  -6   1  235.15   38.06
  -6  -6  -1  225.99   30.61
  -6   6  -2  877.36  106.77
   6   6   2  932.29   99.98
  -6   6  -2  795.11   80.85
   6   6   2  755.33  103.84
   6  -6   2  748.86   93.85
   6  -6   2  824.61   74.01
  -6  -6  -2  835.24   81.90
  -6  -6  -2  748.58  100.10
  -6   6  -3 1877.57   71.72
   6   6   3 1632.94   86.10
  -6   6  -3 1381.46   71.78
   6   6   3 1777.32   76.36
   6  -6   3 1570.63  104.44
   6  -6   3 1990.43   74.59
  -6  -6  -3 1767.49   78.80
  -6  -6  -3 1685.73   74.24
   6   6   416068.94  633.75
   6   6   420387.79 4200.25
  -6   6  -419919.52 4097.39
  -6  -6  -417838.94 3670.72
   6  -6   419717.30 4063.71
   6  -6   416475.35  640.82
   6   6   5 4455.47  239.27
   6   6   5 5046.11  297.67
  -6   6  -5 5831.13  298.13
  -6  -6  -5 4938.02  281.39
   6  -6   5 4991.20  317.05
  -6   6  -6 4203.44  187.91
   6   6   6 3971.14  226.46
   6  -6   6 4258.30  243.27
  -6  -6  -6 4153.56  212.75
  -6   6  -7  856.38   88.87
   6   6   7 1026.41  142.64
  -6   6  -7  965.09   99.33
   6  -6   7 1232.67  316.58
  -6  -6  -7  974.57  179.59
   6   6   8  425.74  171.58
   6  -6   8  368.82  119.91
  -6  -6  -8  508.25   66.05
   6   6   9   82.52   88.34
   6  -6   9  163.99   83.98
   6   6  10 3954.70  651.30
  -6  -6 -10 3266.16  524.03
   6   8 -11  588.77  202.01
  -6  -8  11  528.94  225.76
   6   8 -10   94.76   23.16
  -6   8  10   -0.21   40.22
  -6  -8  10  339.27   96.98
   6   8  -9   28.18   19.69
  -6   8   9   56.38   50.46
  -6  -8   9   -7.81   37.37
   6   8  -8  551.44  163.04
  -6   8   8  470.33  190.03
  -6  -8   8  495.41  130.39
  -6   8   6  592.14  127.17
   6   8  -6  533.26   84.47
   6  -8  -6  267.79   72.32
  -6  -8   6  617.07   75.25
  -6   8   5 1360.62  118.44
   6   8  -5 1344.91  136.07
  -6   8   5 1319.85   93.19
  -6  -8   5 1184.07   97.34
   6  -8  -5 1185.44   85.95
  -6  -8   5 1547.92  177.09
  -6   8   4  798.95  106.18
  -6   8   4  738.49   83.97
   6   8  -4 1097.19  175.84
   6   8  -4  741.55   90.98
   6  -8  -4  847.73  101.63
   6  -8  -4  741.84   92.93
  -6  -8   4 1001.87  164.91
  -6  -8   4  664.35  139.40
  -6   8   3   32.15   35.61
  -6   8   3   36.32   13.03
   6   8  -3   37.82   20.93
   6   8  -3   57.65   26.04
   6  -8  -3    2.62   14.77
  -6  -8   3   78.96   37.41
   6  -8  -3   72.03   28.58
  -6  -8   3    8.90   18.70
  -6   8   2  138.97   42.04
  -6   8   2  127.14   19.34
   6   8  -2  166.43   34.56
   6   8  -2  190.70   31.84
   6  -8  -2  103.37   34.58
   6  -8  -2  165.07   38.50
  -6  -8   2  167.91   33.04
  -6  -8   2  181.27   29.72
  -6   8   119073.72  522.78
  -6   8   121561.77  587.25
   6   8  -120272.13  560.36
   6   8  -119793.68  537.75
   6  -8  -120391.27  576.07
   6  -8  -119173.83  522.43
  -6  -8   120455.35  559.53
  -6  -8   119040.52  518.99
  -6   8   0  119.20   41.05
  -6   8   0   86.08   27.80
   6   8   0  185.89   37.97
   6   8   0  117.36   23.54
   6  -8   0  111.26   41.33
   6  -8   0   96.31   26.08
  -6  -8   0  143.79   36.73
  -6  -8   0  107.92   18.94
  -6   8  -1   -8.86   14.52
  -6   8  -1   37.38   17.79
   6   8   1   32.45   23.07
   6   8   1   48.30   19.99
   6  -8   1  128.33   50.30
  -6  -8  -1   10.78   23.86
   6  -8   1   57.32   22.21
  -6  -8  -1    4.24   19.58
   6   8   2 1684.73   88.88
   6   8   2 2018.61  101.29
  -6   8  -2 1913.43   74.46
   6  -8   2 1858.18  212.52
   6  -8   2 1845.84   67.95
  -6  -8  -2 1904.42   82.79
  -6  -8  -2 1567.19  103.18
   6   8   3  120.90   35.34
   6   8   3    6.55   29.82
  -6   8  -3   65.87   21.04
   6  -8   3   18.81   49.17
   6  -8   3   88.90   15.46
  -6  -8  -3  120.48   42.54
  -6  -8  -3   72.79   24.95
   6   8   4  482.93   72.92
   6   8   4  636.80   76.50
  -6   8  -4  442.09   75.47
  -6  -8  -4  637.09   90.72
   6  -8   4  710.17  102.93
   6  -8   4  430.45   69.33
  -6   8  -5 4976.13  168.12
   6   8   5 5815.54  250.90
   6  -8   5 5448.00  456.73
  -6  -8  -5 5440.00  200.77
   6   8   6  124.84   86.38
   6  -8   6  115.51   43.59
  -6  -8  -6   68.14   34.24
   6   8   7   39.63   45.02
   6  -8   7  243.63  100.08
  -6  -8  -7   47.97   31.42
   6   8   8   29.42   41.53
   6  -8   8   65.40   66.54
  -6  -8  -8   14.79   33.86
   6   8   9 1261.95  246.26
   6  -8   9  497.48  269.45
  -6  -8  -9 1414.69  128.06
   6   8  10   50.51   86.16
  -6   8 -10   32.58   24.40
  -6  -8 -10   53.23   35.09
   6  10 -11  396.64  133.55
  -6 -10  11  681.69  169.86
   6  10 -10  735.15  216.73
  -6 -10  10 1107.32  201.04
   6  10  -9  745.76  146.30
  -6  10   9  777.22  171.23
  -6 -10   9  796.93  137.32
   6  10  -8 1003.16  131.63
  -6  10   8  721.23  226.02
  -6 -10   8  957.41  109.36
   6  10  -7 1006.53  148.64
  -6  10   7  789.98  239.66
  -6 -10   7  975.78  196.77
   6  10  -6 5528.05  207.49
  -6  10   6 5343.99  242.02
  -6 -10   6 5083.72  197.39
   6  10  -5 1839.73  159.37
  -6  10   5 1900.48  239.97
  -6 -10   5 1681.24  175.17
  -6  10   4 1010.50  131.45
  -6  10   4  690.95   57.65
   6  10  -4  817.66  108.98
   6  10  -4  782.24   91.39
  -6 -10   4  648.37  112.46
  -6 -10   4  895.06   87.84
   6 -10  -4  667.23   93.98
  -6  10   3 3203.48  158.98
  -6  10   3 2962.50  125.64
   6  10  -3 3010.82  138.41
   6  10  -3 2625.82  169.89
   6 -10  -3 2748.42  129.05
   6 -10  -3 3068.72  145.24
  -6 -10   3 3296.90  220.52
  -6 -10   3 2778.76  126.77
   6  10  -2 3073.91  113.63
   6  10  -2 3214.01  122.13
  -6  10   2 3506.09  142.43
   6 -10  -2 3421.07  217.40
   6 -10  -2 3186.10  120.80
  -6 -10   2 3158.57  123.39
  -6 -10   2 3041.42  113.87
  -6  10   1 5465.61  193.97
  -6  10   1 5282.12  183.51
   6  10  -1 5302.44  202.75
   6  10  -1 4371.64  153.79
   6 -10  -1 4803.66  271.28
   6 -10  -1 5173.45  178.93
  -6 -10   1 5233.29  195.99
  -6 -10   1 4887.26  168.15
  -6  10   0 7379.48  246.68
  -6  10   0 7556.48  256.15
   6  10   0 8522.96  291.45
   6  10   0 8245.54  276.05
   6 -10   0 9779.61  350.59
   6 -10   0 8488.69  279.11
  -6 -10   0 8669.24  291.67
  -6 -10   0 7791.89  258.36
  -6  10  -1 2031.33   83.14
  -6  10  -1 1807.22   81.08
   6  10   1 2043.01   87.78
   6  10   1 2350.31   96.75
   6 -10   1 2891.34  301.51
   6 -10   1 2186.52   81.00
  -6 -10  -1 2015.24   96.39
  -6 -10  -1 2121.08   82.20
  -6  10  -2 1224.62  109.18
  -6  10  -2 1263.40  156.12
   6  10   2 1408.27  189.19
   6  10   2 1201.11  138.62
   6 -10   2 1591.39  193.73
   6 -10   2 1168.16  130.98
  -6 -10  -2 1542.16  143.07
  -6 -10  -2 1207.07  143.97
   6  10   3 1338.58  153.76
   6  10   3 1486.46  120.31
  -6  10  -3 1608.38  114.39
   6 -10   3 2024.43  301.85
   6 -10   3 1436.60  100.88
  -6 -10  -3 1546.45  121.43
  -6 -10  -3 1519.43  115.81
   6  10   4 2842.63  175.73
   6 -10   4 4014.97  434.51
  -6 -10  -4 3714.14  250.48
   6  10   5 3695.49  188.20
   6 -10   5 3389.25  478.68
  -6 -10  -5 3487.10  146.88
   6  10   6  112.33   69.71
   6 -10   6   -3.79   48.71
  -6 -10  -6   41.23   29.35
   6  10   7  574.86  128.39
   6 -10   7  381.62  108.62
  -6 -10  -7  526.11   94.85
   6  10   8  113.10   66.89
   6 -10   8   99.16   72.83
  -6 -10  -8  193.91   60.10
   6  10   9  819.72  325.24
  -6 -10  -9  784.60  226.48
   6  10  10 1681.52  455.73
  -6  10 -10 2095.97  257.14
  -6 -10 -10 2060.76  248.31
   6  12 -11  470.96  132.77
  -6 -12  11  971.47  234.45
   6  12 -10  138.98   59.22
  -6 -12  10  168.15   61.93
   6  12  -9 3921.29  232.13
  -6 -12   9 4129.75  254.96
   6  12  -8   33.27   25.16
  -6  12   8   86.11   37.25
  -6 -12   8  154.16   59.15
   6  12  -7 1786.13  259.12
  -6  12   7 1931.98  279.08
  -6 -12   7 1562.74  266.12
   6  12  -6  754.71  111.68
  -6  12   6  775.16  178.13
  -6 -12   6  521.65  126.87
   6  12  -5 4754.00  256.14
  -6  12   5 4834.54  297.54
  -6 -12   5 5023.18  276.97
  -6  12   4  984.19   69.78
   6  12  -4 1126.10  158.74
  -6  12   4 1049.93  156.26
  -6 -12   4 1179.50  120.17
   6  12  -3 6980.92  296.80
  -6  12   3 6487.11  265.85
   6  12  -3 6282.08  265.34
  -6  12   3 6788.90  304.73
   6 -12  -3 7678.53  420.67
  -6 -12   3 6289.44  272.71
   6 -12  -3 6071.13  264.08
  -6  12   2   44.32   27.41
  -6  12   2   46.75   15.35
   6  12  -2  112.94   33.60
   6  12  -2   18.65   19.35
   6 -12  -2   -1.12   17.50
   6 -12  -2   49.26   19.84
  -6 -12   2   50.94   39.47
  -6 -12   2   82.75   27.54
  -6  12   1 2197.09  138.71
  -6  12   1 1772.34   78.45
   6  12  -1 2123.59  185.51
   6  12  -1 1655.51  136.85
   6 -12  -1 2104.35  113.55
   6 -12  -1 1961.02   82.85
  -6 -12   1 2071.62   93.38
  -6 -12   1 1835.33   75.31
  -6  12   0 1154.98  150.79
  -6  12   0  612.42   64.64
   6  12   0  999.82  105.09
   6  12   0  888.63   83.81
   6 -12   0 1138.10  151.63
   6 -12   0  841.86  101.37
  -6 -12   0  916.72   97.22
  -6 -12   0  890.52   85.68
  -6  12  -1 4894.16  210.42
  -6  12  -1 4727.94  219.15
   6  12   1 4445.11  195.73
   6  12   1 4812.06  207.39
   6 -12   1 5360.40  468.08
   6 -12   1 4691.46  197.93
  -6 -12  -1 4638.95  207.64
  -6 -12  -1 4343.27  187.12
  -6  12  -2 1366.16  169.99
  -6  12  -2 1140.32  142.21
   6  12   2 2032.68  242.75
   6  12   2 1216.01  141.79
   6 -12   2 1536.13  177.87
   6 -12   2 1216.92  136.83
  -6 -12  -2 1544.03  147.69
  -6 -12  -2 1243.79  145.31
   6  12   3 3555.52  216.25
   6 -12   3 3266.96  276.97
  -6 -12  -3 3432.13  210.02
   6 -12   3 3072.62  632.66
   6  12   4  152.59   58.89
   6 -12   4  261.51  101.91
  -6 -12  -4  206.08   52.31
   6  12   5  182.79   56.69
   6 -12   5  218.22   76.60
  -6 -12  -5  169.15   55.12
   6  12   6  179.45   78.50
   6 -12   6  201.39   91.31
  -6 -12  -6  173.91   55.18
   6  12   7 2507.84  302.88
   6 -12   7 1874.00  490.75
  -6 -12  -7 2213.70  289.48
   6  12   8  341.92  104.09
  -6 -12  -8  195.44   76.67
   6  12   9   55.80   55.65
  -6  12  -9   75.20   42.21
  -6 -12  -9  221.96   91.58
   6  12  10   20.50   35.26
  -6  12 -10  104.61   62.06
  -6 -12 -10   -5.56   26.79
   6  14 -11  609.52  203.47
   6  14 -10  737.98  195.68
  -6 -14  10 1151.58  265.78
   6  14  -9 3099.90  188.17
  -6 -14   9 3464.31  224.18
   6  14  -8 1213.53  196.54
  -6 -14   8 1362.23  163.38
   6  14  -7  393.87  122.65
  -6  14   7  326.75  109.85
  -6 -14   7  562.63  148.83
   6  14  -6  775.16  179.60
  -6  14   6  757.00  173.11
  -6 -14   6  760.15  170.17
   6  14  -5 3139.52  142.18
  -6  14   5 3185.86  177.90
  -6 -14   5 3080.37  138.15
  -6  14   4 3258.91  166.43
   6  14  -4 4273.54  231.86
  -6  14   4 4505.66  342.37
  -6 -14   4 4556.47  308.92
  -6  14   3 2985.60  207.08
   6  14  -3 3279.71  147.73
  -6  14   3 3620.26  252.23
  -6 -14   3 3171.80  150.22
   6  14  -2  509.75   72.13
  -6  14   2  502.13   66.61
  -6  14   2  636.36  100.01
   6 -14  -2  351.08   66.98
   6 -14  -2  328.25   86.43
  -6 -14   2  679.03  119.54
  -6  14   1 2911.67  214.70
   6  14  -1 3075.64  185.77
   6 -14  -1 3030.31  284.99
   6 -14  -1 2649.14  124.60
  -6 -14   1 2911.59  161.38
  -6  14   0  166.41   35.42
  -6  14   0   79.30   30.36
   6  14   0  203.84   43.71
  -6 -14   0  193.55   32.31
   6 -14   0  262.40   59.75
   6 -14   0  180.51   33.14
  -6 -14   0  105.80   41.89
   6  14   1 6693.38  287.47
  -6  14  -1 7424.16  329.06
  -6  14  -1 7019.61  317.88
   6 -14   1 6861.38  322.56
   6 -14   1 7093.27  293.64
  -6 -14  -1 6942.27  298.13
   6  14   2 3781.24  168.95
   6 -14   2 4449.86  328.79
   6 -14   2 4574.34  186.36
  -6 -14  -2 4216.10  183.46
   6  14   3 2815.60  326.17
   6 -14   3 3230.58  437.83
  -6 -14  -3 2889.60  240.84
   6 -14   3 2224.97  162.48
   6  14   4 1098.78  110.38
   6 -14   4 1190.49  230.32
  -6 -14  -4 1053.26  131.60
   6  14   5  732.20  112.26
   6 -14   5 1023.45  201.93
  -6 -14  -5  930.41  173.40
   6  14   6   85.00   47.96
   6 -14   6  195.54   99.80
  -6 -14  -6  136.00   55.30
   6  14   7 3308.22  294.96
  -6 -14  -7 3562.23  253.68
   6  14   8  260.91   82.37
  -6  14  -8  367.47   78.80
  -6 -14  -8  284.98   72.36
   6  14   9  863.33  184.67
  -6  14  -9 1031.58  198.59
  -6 -14  -9  571.95  180.59
   6  14  10  645.29  257.22
  -6  14 -10  927.46  169.38
  -6 -14 -10  428.56  175.42
   6  16 -10 1017.17  303.65
  -6 -16  10 1635.09  280.23
   6  16  -9   93.80   38.12
  -6 -16   9   47.93   43.11
   6  16  -8  758.02  137.14
  -6 -16   8  442.08  188.65
   6  16  -7 2432.24  186.96
  -6 -16   7 2893.02  210.63
   6  16  -6  393.40   78.85
  -6  16   6  191.98   67.71
  -6 -16   6  406.05   76.90
   6  16  -5 2707.72  265.47
  -6  16   5 2536.74  284.60
  -6 -16   5 2705.66  145.50
   6  16  -4 9202.66  331.10
  -6  16   4 9806.96  432.90
  -6  16   3 4410.00  279.92
   6  16  -3 3525.24  197.48
  -6  16   3 3551.87  189.88
  -6  16   3 3377.21  280.80
  -6 -16   3 3214.81  184.34
  -6  16   2  218.08   38.04
   6  16  -2  231.45   50.42
  -6  16   2  243.14   38.52
  -6  16   2  437.40   90.79
   6 -16  -2  311.43   57.21
  -6 -16   2  349.23   68.31
   6  16  -1 4464.24  192.88
  -6  16   1 4713.12  349.51
  -6  16   1 4700.58  217.60
   6 -16  -1 4861.46  400.30
   6 -16  -1 4465.24  190.79
  -6 -16   1 5204.52  290.98
   6  16   0 1980.11  158.36
  -6  16   0 1853.44  147.12
  -6  16   0 2015.89  199.30
   6 -16   0 2009.31  268.74
   6 -16   0 1820.66  134.68
  -6 -16   0 2156.24  195.52
   6  16   1  241.11   61.97
  -6  16  -1  276.96   57.55
   6 -16   1  463.16   86.89
   6 -16   1  222.38   46.47
  -6 -16  -1  350.29   78.52
   6  16   213310.08  685.01
   6 -16   213222.60  717.46
   6 -16   214116.11  717.07
  -6 -16  -213519.79  696.60
   6  16   3 3833.32  173.49
   6 -16   3 2885.68  271.64
  -6 -16  -3 3035.29  131.11
   6 -16   3 2984.66  109.27
   6  16   4   90.63   46.85
   6 -16   4  265.08  100.76
  -6 -16  -4  299.56   67.91
   6  16   5 1931.71  231.25
  -6 -16  -5 2541.00  602.42
   6  16   6 3068.29  236.28
  -6  16  -6 2801.58  201.84
  -6 -16  -6 2535.81  211.80
   6  16   7   80.39   39.49
  -6  16  -7   82.54   55.41
  -6 -16  -7   92.92   31.76
   6  16   8 3180.17  275.02
  -6  16  -8 3940.32  309.52
  -6 -16  -8 3758.98  305.85
   6  16   9  586.73  255.69
  -6  16  -9 1998.93  328.39
  -6 -16  -9 1167.01  309.55
   6  18 -10   76.79   33.31
  -6 -18  10   -5.79   38.44
   6  18  -9  229.11   85.87
  -6 -18   9   26.67   23.17
   6  18  -8  110.74   39.04
  -6 -18   8  103.42   28.89
   6  18  -7 2737.71  239.05
  -6 -18   7 2867.62  218.90
   6  18  -6  496.23  157.96
  -6 -18   6  387.23  130.12
   6  18  -5 1243.91  178.62
  -6 -18   5 1155.54  234.24
  -6  18   4  368.59   51.41
   6  18  -4  549.23   92.47
  -6 -18   4  601.72   96.54
  -6  18   3 2202.83  197.24
   6  18  -3 2057.82  164.19
  -6  18   3 2464.35  209.30
  -6 -18   3 2102.82  165.75
  -6  18   2  416.48   90.48
   6  18  -2  580.69   96.00
  -6  18   2  694.58   75.81
  -6 -18   2  565.85   65.36
  -6  18   1 3137.12  183.07
   6  18  -1 3259.64  287.34
  -6  18   1 2709.37  203.99
   6 -18  -1 2683.62  206.74
  -6 -18   1 3279.94  257.95
  -6  18   0   60.78   40.03
   6  18   0  149.96   49.69
  -6  18   0   40.30   36.15
   6 -18   0   23.68   11.61
  -6 -18   0  125.30   39.63
  -6  18  -1 3159.31  226.62
   6  18   1 3679.21  206.34
   6 -18   1 3475.80  185.96
  -6 -18  -1 3469.97  262.05
   6  18   2   67.61   44.52
   6 -18   2   53.00   21.58
  -6 -18  -2   93.63   55.51
   6 -18   2   27.59   14.61
   6  18   3  831.14  188.37
  -6  18  -3  735.92  102.86
   6 -18   3  593.87   75.39
  -6 -18  -3  599.12   89.42
   6 -18   3  701.39   86.23
   6  18   4  -19.40   32.38
  -6  18  -4   87.31   65.50
  -6 -18  -4   48.65   38.28
   6  18   5 1414.41  170.46
  -6  18  -5 1650.61  189.17
  -6 -18  -5 1573.62  221.38
   6  18   6   83.47   45.20
  -6  18  -6   46.82   41.41
  -6 -18  -6   60.14   44.70
   6  18   7 1568.68  245.10
  -6  18  -7 1445.56  265.24
  -6 -18  -7 1286.11  251.85
   6  18   8   46.83   46.11
  -6  18  -8  109.86   61.86
  -6 -18  -8   -8.09   31.91
  -6  18  -9  217.70   84.80
  -6 -18  -9   60.57   50.29
   6  20 -10  154.34   43.79
   6  20  -9   69.77   26.30
  -6 -20   9  173.68   82.42
   6  20  -8  978.08  216.94
  -6 -20   8 1221.90  213.95
   6  20  -7  362.71   87.05
  -6 -20   7  253.84   84.43
   6  20  -6 5735.08  385.99
  -6 -20   6 5730.77  411.07
   6  20  -5   52.26   34.54
  -6 -20   5  110.62   54.03
   6  20  -4 2613.38  616.40
  -6 -20   4 2341.53  323.70
  -6  20   3 1752.35   89.06
   6  20  -3 1524.43  196.28
  -6  20   3 1919.62  131.83
  -6 -20   3 1967.07  206.67
  -6  20   2 1584.63  182.34
   6  20  -2 1745.11  189.79
  -6  20   2 1920.64  178.75
  -6 -20   2 1603.83  137.28
  -6  20   1   77.89   38.89
   6  20  -1   66.07   29.87
  -6  20   1   23.39   17.41
   6 -20  -1   34.01   28.40
  -6 -20   1   90.14   60.41
  -6  20   0 3455.53  315.78
   6  20   0 4634.49  205.74
  -6  20   0 4348.31  164.83
   6 -20   0 4248.74  165.75
  -6 -20   0 4562.00  260.57
   6  20   1  286.76   71.56
  -6  20  -1  199.84   52.81
   6 -20   1  223.96   55.47
  -6 -20  -1  227.70   63.20
   6  20   2   80.99   47.97
  -6  20  -2   47.72   27.15
   6 -20   2   31.18   14.65
  -6 -20  -2  109.94   42.37
   6 -20   2  102.12   30.56
   6  20   3  112.99   39.79
  -6  20  -3   65.27   34.97
   6 -20   3   23.85   10.20
  -6 -20  -3  104.40   58.30
   6 -20   3   28.10   12.82
   6  20   4 5618.71  345.66
  -6  20  -4 5117.04  308.59
  -6 -20  -4 4624.91  283.63
   6  20   5   36.82   28.40
  -6  20  -5  112.84   49.56
  -6 -20  -5  149.49   58.11
   6  20   6  451.03  101.80
  -6  20  -6  763.26   84.32
  -6 -20  -6  558.29  161.81
   6  20   7  192.96   85.84
  -6  20  -7  217.64   74.13
  -6 -20  -7  440.96  113.00
   6  20   8   78.21   78.17
  -6  20  -8  212.01   95.04
  -6 -20  -8   31.08   44.67
  -6  20  -9   49.41   39.20
  -6 -20  -9   67.19   36.11
   6  22  -9 1219.85  208.13
  -6 -22   9 1519.67  194.88
   6  22  -8 1150.06  333.97
  -6 -22   8 1740.56  155.04
   6  22  -7 3280.72  201.93
  -6 -22   7 3082.35  191.51
   6  22  -6 2454.82  166.92
  -6 -22   6 2372.05  250.63
   6  22  -5 1568.22  234.97
  -6 -22   5 1908.69  192.21
  -6  22   4 1582.87  160.74
   6  22  -4 2080.93  349.89
  -6 -22   4 1828.29  239.91
  -6  22   3 4194.88  242.31
   6  22  -3 4892.75  333.84
  -6  22   3 4720.41  269.20
  -6 -22   3 4641.00  280.93
  -6  22   211801.84  531.16
   6  22  -211316.01  509.63
  -6  22   212074.30  533.38
  -6 -22   211886.37  540.16
   6  22  -1 2178.43  215.45
  -6  22   1 2944.99  217.18
  -6 -22   1 2417.91  228.08
  -6  22   0 4090.71  359.57
   6  22   0 5626.80  272.31
  -6  22   0 5355.75  248.75
   6 -22   0 5025.37  235.73
  -6 -22   0 4798.95  256.89
   6  22   1 1929.41  160.55
  -6  22  -1 1596.22  198.73
   6 -22   1 1592.12  196.76
  -6 -22  -1 1604.49  255.86
   6 -22   1 1358.78  207.00
   6  22   2  210.09   60.13
  -6  22  -2  145.75   62.79
  -6 -22  -2  109.19   58.89
   6 -22   2  109.55   39.29
   6  22   3 1982.67  218.07
  -6  22  -3 2395.78  259.80
   6 -22   3 2036.82  209.42
  -6 -22  -3 2342.63  252.59
   6 -22   3 2447.40  247.79
   6  22   4 4043.34  286.58
  -6  22  -4 3507.44  305.83
  -6 -22  -4 3603.80  262.21
   6  22   5 1445.93  167.69
  -6  22  -5 1395.64  191.82
  -6 -22  -5 1829.08  237.68
   6  22   6 2467.01  174.75
  -6  22  -6 3069.29  201.60
  -6 -22  -6 2743.39  335.44
   6  22   7 3308.11  273.61
  -6  22  -7 3033.20  273.78
  -6 -22  -7 3189.27  320.94
   6  22   8 1613.28  235.53
  -6  22  -8 2115.17  260.10
  -6 -22  -8 1935.80  238.40
   6  24  -9   67.43   26.32
   6  24  -8  120.17   45.59
  -6 -24   8   85.55   49.79
   6  24  -7  615.56  213.14
  -6 -24   7  877.71  153.44
   6  24  -6  107.57   28.52
  -6 -24   6  146.87   63.53
   6  24  -5  102.00   43.86
  -6 -24   5  180.55   69.46
   6  24  -4 4852.82  330.96
  -6 -24   4 5209.16  356.14
  -6  24   3  108.44   32.58
   6  24  -3  112.65   55.74
  -6  24   3  175.12   49.01
  -6 -24   3  195.06   72.00
  -6  24   2   20.79   17.04
   6  24  -2  152.18   51.09
  -6  24   2  104.13   33.53
  -6 -24   2  151.05   62.36
  -6  24   1 4328.69  362.45
   6  24  -1 5318.67  315.30
  -6  24   1 5817.46  336.56
  -6 -24   1 5521.79  330.66
   6  24   0  124.87   49.73
  -6  24   0  270.85   53.27
   6 -24   0   49.30   24.92
  -6 -24   0  136.23   58.57
   6 -24   0  203.78   44.50
   6  24   1  914.67  176.99
  -6  24  -1 1280.01  155.31
   6 -24   1  720.86  102.89
  -6 -24  -1 1054.76  128.02
   6 -24   1 1037.79  145.32
   6  24   2 5075.83  308.81
  -6  24  -2 5406.50  321.28
  -6 -24  -2 5114.38  392.05
   6 -24   2 5103.43  296.01
   6  24   3  238.58   49.21
  -6  24  -3  477.92  124.64
  -6 -24  -3  510.97  105.13
   6 -24   3  260.46   61.63
   6  24   4   84.67   38.96
  -6  24  -4   50.68   39.64
  -6 -24  -4   54.78   45.15
   6  24   5 1003.25   95.15
  -6  24  -5 1102.18   86.94
  -6 -24  -5 1253.87   96.93
   6  24   6  148.66   70.53
  -6  24  -6  257.26   91.83
  -6 -24  -6  161.26   82.61
   6  24   7   88.40   45.39
  -6  24  -7    4.28   45.66
  -6 -24  -7   38.51   37.48
  -6  24  -8 1569.82  268.71
  -6 -24  -8 1295.69  280.86
   6  26  -8   94.20   47.78
  -6 -26   8   31.18   35.19
   6 -26  -8  129.99   86.22
   6  26  -7   -4.90   46.49
  -6 -26   7   56.82   40.99
   6  26  -6  266.84   84.48
  -6 -26   6   72.93   38.91
   6  26  -5  138.76   66.73
  -6 -26   5  163.52   64.12
   6  26  -4  744.36  101.75
  -6 -26   4  363.08  111.81
   6  26  -3 1124.78  140.80
  -6  26   3 1139.03  142.34
  -6 -26   3  818.45  184.27
   6  26  -2  362.84  110.27
  -6  26   2  417.10   75.19
  -6 -26   2  387.64   83.70
   6 -26  -2  295.70   76.49
  -6  26   1  426.14  101.04
   6  26  -1  733.01  144.39
  -6  26   1  660.60  111.72
  -6 -26   1  763.47  216.01
   6 -26  -1  625.15  148.42
   6  26   0   38.23   41.83
  -6  26   0  124.18   50.26
  -6 -26   0  106.69   48.83
   6 -26   0   57.84   34.64
   6  26   1 2120.32  292.12
  -6  26  -1 2541.57  228.26
  -6 -26  -1 2410.45  277.41
   6 -26   1 2176.30  234.21
   6  26   2  815.00  203.82
  -6  26  -2 1054.43  154.41
  -6 -26  -2 1066.72  162.25
   6 -26   2 1184.44  121.94
   6  26   3  601.25   82.43
  -6  26  -3  593.53   91.21
  -6 -26  -3  657.27  125.62
   6  26   4  200.58   75.03
  -6  26  -4   55.19   41.64
  -6 -26  -4   84.45   45.46
   6  26   5   68.66   39.87
  -6  26  -5  141.16   68.94
  -6 -26  -5   34.53   17.35
   6  26   6   -2.80   32.78
  -6  26  -6   35.86   41.23
  -6 -26  -6   55.76   34.95
   6  26   7  679.17  187.71
  -6  26  -7  722.33  241.38
  -6 -26  -7 1331.07  176.01
   6  28  -8  433.79  130.86
   6 -28  -8  268.74   83.85
   6  28  -7  266.11  125.20
  -6 -28   7  597.38  154.95
   6 -28  -7  511.56  131.08
   6  28  -6  986.12  368.55
  -6 -28   6  989.73  325.46
   6 -28  -6 1818.10  165.30
   6  28  -5  866.13  247.85
  -6 -28   5  928.47  164.02
   6 -28  -5  953.49  168.66
   6  28  -4  413.90   92.98
  -6 -28   4  174.37   46.03
   6 -28  -4  388.34   90.43
   6  28  -3  265.73   94.67
  -6  28   3  330.22   92.23
  -6 -28   3  230.49   71.28
   6 -28  -3  469.31  122.93
   6  28  -2 2037.05  343.04
  -6  28   2 2197.03  191.70
  -6 -28   2 2295.93  273.69
   6 -28  -2 2044.69  257.85
   6  28  -1  893.28  202.32
  -6  28   1 1020.00  158.77
  -6 -28   1  898.80  162.04
   6 -28  -1  958.79  157.98
   6  28   0 2050.89  155.55
  -6  28   0 1878.38  131.64
  -6 -28   0 1918.90  235.24
   6 -28   0 1507.93  245.95
   6  28   1 1062.46  242.37
  -6  28  -1 1516.48  194.91
  -6 -28  -1 1326.21  165.19
   6 -28   1 1207.94  163.45
   6  28   2   95.64   36.45
  -6  28  -2  167.42   67.75
  -6 -28  -2  186.19   66.63
   6 -28   2   88.54   32.84
   6  28   3  703.24  130.38
  -6  28  -3  517.19   98.64
  -6 -28  -3  689.27  155.30
   6  28   4 2323.46  206.38
  -6  28  -4 2033.38  290.58
  -6 -28  -4 2227.41  271.99
   6  28   5  931.42  351.85
  -6  28  -5 1609.39  335.23
  -6 -28  -5 2124.37  234.60
   6  28   6  361.58  106.06
  -6  28  -6  741.98  185.87
  -6 -28  -6  721.15  179.32
  -6  28  -7  983.42  282.04
  -6 -28  -7  942.36  304.49
   6  30  -7  665.24  209.58
  -6 -30   7  880.70  224.62
   6 -30  -7 1346.52  237.19
   6  30  -6 1932.95  373.19
  -6 -30   6 1957.90  324.66
   6 -30  -6 2089.21  362.74
   6  30  -5  736.62  179.04
  -6 -30   5  505.41  195.28
   6 -30  -5  599.70  147.19
   6  30  -4 1268.06  216.31
  -6 -30   4  923.13  204.27
   6 -30  -4  931.40  220.39
   6  30  -3 1543.02  230.36
  -6 -30   3 1608.96  235.65
   6 -30  -3 1899.52  226.27
   6  30  -2 1060.60  289.93
  -6  30   2 1451.76  264.04
  -6 -30   2 1375.05  258.37
   6 -30  -2 1423.09  207.32
   6  30  -1  725.09  188.17
  -6  30   1  831.10  126.51
  -6 -30   1 1128.59  178.60
   6 -30  -1  540.64  162.00
   6  30   0  633.50  114.53
  -6  30   0  489.63  105.42
  -6 -30   0  553.76  144.38
   6 -30   0  458.85   79.27
   6  30   1 1470.42  321.58
  -6  30  -1 1756.65  164.55
  -6 -30  -1 1408.21  271.93
   6 -30   1 1841.74  118.81
   6  30   2  473.03  138.56
  -6  30  -2  706.97  178.11
  -6 -30  -2 1019.25  162.32
   6  30   3  493.97  114.82
  -6  30  -3  784.39  145.70
  -6 -30  -3  767.64  197.29
   6  30   4 1471.82  228.50
  -6  30  -4 1939.44  193.50
  -6 -30  -4  996.44  289.32
   6  30   5  396.05  106.69
  -6  30  -5  869.07  206.79
  -6 -30  -5  884.13  284.48
   6  30   6   44.95   43.31
  -6  30  -6   -6.27   54.82
  -6 -30  -6  149.24   55.07
   6  32  -6  228.15   65.22
  -6 -32   6  156.23   71.87
   6 -32  -6   17.72   48.34
   6  32  -5  349.87   96.44
  -6 -32   5  341.09  105.12
   6 -32  -5  245.86  115.02
   6  32  -4  107.52   35.43
  -6 -32   4   65.44   39.43
   6 -32  -4  107.96   59.16
   6  32  -3   48.52   51.50
  -6 -32   3  131.44   72.18
   6 -32  -3   23.38   20.22
   6  32  -2   84.08   29.66
  -6 -32   2  220.96   93.64
   6 -32  -2    3.87   28.12
   6  32  -1 8504.39  637.29
  -6  32   1 8573.97  633.67
  -6 -32   1 9772.10  183.96
   6 -32  -1 7862.49  583.45
   6  32   0   99.29   48.86
  -6  32   0  193.58   68.24
  -6 -32   0  275.06   78.71
   6 -32   0  148.98   61.30
   6  32   1  149.94   67.52
  -6  32  -1   50.71   37.04
  -6 -32  -1   50.90   47.00
   6 -32   1   95.69   32.10
   6  32   2  -25.48   41.56
  -6  32  -2   63.65   29.07
  -6 -32  -2  105.68   42.15
   6  32   3  165.32   48.78
  -6  32  -3  216.97   99.90
  -6 -32  -3  409.96  121.91
   6  32   4  124.51   64.04
  -6  32  -4  196.52   86.57
  -6 -32  -4  159.10   80.56
   6  32   5 1766.44  310.64
  -6  32  -5 2536.19  419.16
  -6 -32  -5 2272.09  436.91
   6  34  -5   81.07   48.81
  -6 -34   5  114.18   59.76
   6 -34  -5   79.75   59.05
   6  34  -4 2039.87  330.61
  -6 -34   4 2264.66  304.68
   6 -34  -4 2193.34  325.34
   6  34  -3   75.35   34.66
  -6 -34   3  153.60   68.24
   6 -34  -3   86.45   60.14
   6  34  -2  171.20   91.56
  -6 -34   2  177.38   66.30
   6 -34  -2   10.22   37.29
   6  34  -1  153.94   45.91
  -6  34   1  335.30  106.44
  -6 -34   1  345.24  116.03
   6 -34  -1  180.92   68.31
   6  34   0   63.23   32.64
  -6  34   0  101.49   58.62
  -6 -34   0  106.11   38.05
   6 -34   0   61.57   43.21
   6  34   1  294.77   85.72
  -6  34  -1  246.69   73.89
  -6 -34  -1   44.08   66.74
   6  34   2  748.69  367.59
  -6  34  -2 1386.17  370.44
  -6 -34  -2 1852.80  431.70
   6  34   3   43.06   43.19
  -6 -34  -3   43.11   34.53
   6  34   4  144.94   54.49
  -6  34  -4  241.44   82.82
  -6 -34  -4  283.55   66.18
   6  36  -3  665.61  292.99
  -6 -36   3  974.10  214.92
   6 -36  -3 1042.69  185.90
   6  36  -2  619.23  214.48
  -6 -36   2  901.05  288.44
   6 -36  -2  696.87  238.19
   6  36  -1   43.79   37.25
  -6 -36   1  157.00   82.16
   6 -36  -1  142.33   50.31
   6  36   0  143.03   62.45
  -6  36   0  103.75   41.89
  -6 -36   0  163.32   67.97
   6  36   1 1120.77  230.28
  -6  36  -1 1181.20  241.89
  -6 -36  -1 1534.08  263.78
   6  36   2  213.61   63.88
  -6  36  -2  171.09   50.97
  -6 -36  -2  240.31   74.43
  -7   1  11   60.17   44.76
  -7  -1  11   -2.05   52.14
   7   1 -10  129.60   46.80
  -7   1  10  184.21   79.62
  -7  -1  10   60.77   26.36
   7  -1 -10   77.24   21.30
   7   1  -9  748.10  144.77
  -7   1   9  935.20   85.54
  -7  -1   9  909.71   99.43
   7  -1  -9  709.28  166.75
   7   1  -8   67.44   22.49
  -7   1   8  103.43   32.19
  -7   1   8  212.86   87.26
   7  -1  -8  152.31   44.99
  -7  -1   8   91.04   32.85
  -7  -1   8  109.48   45.53
   7   1  -7  475.60   76.26
  -7   1   7  697.48  118.94
  -7   1   7  574.97   88.76
  -7  -1   7  554.77   87.94
  -7  -1   7  551.47   98.59
   7  -1  -7  477.53  118.75
  -7   1   6 8740.64  304.97
   7   1  -610255.48  355.58
  -7   1   6 9502.01  350.40
   7  -1  -610667.28  369.65
  -7  -1   610536.45  384.43
  -7  -1   6 8340.53  293.34
   7   1  -5   18.70    8.83
  -7   1   5  128.96   54.03
  -7   1   5   32.11   13.09
  -7  -1   5   -2.52   16.02
  -7  -1   5   21.71   31.15
   7  -1  -5  -17.13   14.09
   7   1  -4  226.74   43.84
  -7   1   4  285.76   56.80
  -7   1   4  261.11   47.23
  -7  -1   4  306.67   54.62
  -7  -1   4  328.96   67.34
   7  -1  -4  292.58   56.81
  -7   1   3  938.26  100.05
   7   1  -3  746.79   79.06
  -7   1   3  901.38   81.56
   7   1  -3  895.71  110.03
  -7  -1   3  841.93  113.54
   7  -1  -3  722.32   69.55
  -7  -1   3  946.99  111.69
   7  -1  -3  900.97  113.08
   7   1  -2 2280.80   90.95
   7   1  -2 2068.62   83.71
  -7   1   2 2321.12   86.39
  -7   1   2 2594.23  174.68
   7  -1  -2 2588.05  104.60
  -7  -1   2 2132.82   96.29
  -7  -1   2 2088.60   90.42
   7  -1  -2 1948.27   79.55
   7   1  -1 3071.32  199.18
  -7   1   1 2427.19   92.36
  -7   1   1 2392.90   82.29
   7   1  -1 2485.95   85.65
  -7  -1   1 2487.61   83.61
  -7  -1   1 2515.87   96.38
   7  -1  -1 2304.90   81.31
   7  -1  -1 2369.33   91.60
   7   1   019185.06  533.91
  -7   1   018415.25  505.51
  -7   1   017134.36  467.91
   7   1   019779.44  537.91
  -7  -1   018351.48  500.23
   7  -1   017459.97  487.46
  -7  -1   019040.95  522.82
   7  -1   018938.45  515.37
   7   1   1   77.60   43.25
  -7   1  -1    5.07   15.23
   7   1   1    4.06   12.84
  -7   1  -1   10.14   17.48
   7  -1   1   19.38   28.55
  -7  -1  -1   38.81   28.53
  -7  -1  -1   14.32   16.40
   7  -1   1  -16.35   16.52
   7   1   2  448.87   70.87
  -7   1  -2  458.68   87.74
   7   1   2  393.69   52.34
  -7   1  -2  411.20   47.65
   7  -1   2  423.69   80.47
  -7  -1  -2  281.40   37.45
  -7  -1  -2  512.84   79.40
   7  -1   2  430.73   56.66
   7   1   3 1341.33  194.40
   7   1   3 1601.54  235.77
  -7   1  -3 1324.32  150.13
  -7  -1  -3 1299.36  149.03
   7  -1   3 1715.37  237.32
   7  -1   3 1478.74  192.63
   7   1   4 5898.85  270.86
  -7   1  -4 5984.01  242.95
  -7  -1  -4 6249.10  254.33
   7  -1   4 5822.10  281.48
   7  -1   4 5032.18  214.03
   7   1   5 1396.65  149.45
   7   1   5 1164.67  146.59
  -7   1  -5 1509.52  153.73
  -7  -1  -5 1460.04  113.73
   7  -1   5 1454.71  111.87
   7  -1   5 1378.12  167.40
   7   1   6 7195.06  438.81
  -7   1  -6 7876.03  445.72
   7  -1   6 6749.74  416.22
  -7  -1  -6 7136.87  412.91
   7   1   7  -31.95   70.62
  -7   1  -7    3.82    8.38
   7  -1   7   10.12   64.19
  -7  -1  -7   96.19   33.34
   7   1   8   18.64   60.83
   7  -1   8    4.38   44.89
  -7  -1  -8   30.42   16.92
   7   1   9  558.65  149.71
   7  -1   9  549.41  245.99
   7   1  10 2468.11  326.35
   7  -1  10 1744.06  642.60
  -7   3  11   67.05   83.39
  -7  -3  11  124.05   57.71
   7   3 -10  106.34   52.56
  -7   3  10  140.29   67.96
  -7  -3  10  274.71   89.79
   7   3  -9  140.17   46.16
  -7   3   9  178.41   82.41
   7  -3  -9  119.56   41.75
  -7  -3   9  309.34   93.24
  -7   3   8  950.32  128.87
   7   3  -8  515.41  130.79
   7  -3  -8  418.35   94.95
  -7  -3   8  747.99  134.11
   7   3  -7 2444.79  273.88
  -7   3   7 2734.56  192.38
   7  -3  -7 2610.63  562.56
  -7  -3   7 2291.72  256.80
  -7  -3   7 2410.49  280.27
  -7   3   6  867.67  134.23
   7   3  -6 1142.72  113.92
  -7   3   6 1112.59  110.17
   7  -3  -6 1236.53  102.46
  -7  -3   6 1163.92  111.69
  -7  -3   6  955.73  106.27
   7   3  -5   96.43   27.43
  -7   3   5   77.64   22.46
  -7   3   5  101.68   48.06
   7  -3  -5   33.14   17.81
  -7  -3   5   -1.44   18.91
  -7  -3   5  137.05   47.33
  -7   3   4  186.00   50.28
   7   3  -4  227.05   45.72
  -7   3   4  196.09   42.12
  -7  -3   4  247.05   40.45
   7  -3  -4  164.54   30.07
  -7  -3   4  191.33   48.01
  -7   3   3  850.43   93.91
   7   3  -3  738.95   98.97
  -7   3   3  755.55   68.88
   7   3  -3  782.46   78.04
  -7  -3   3  931.57  106.61
   7  -3  -3  979.06  126.39
  -7  -3   3  666.62   85.82
   7  -3  -3  649.25  155.35
  -7   3   2  720.25   81.12
   7   3  -2  593.46   62.23
  -7   3   2  869.79  105.05
   7   3  -2  470.58   89.76
   7  -3  -2  827.81   99.78
   7  -3  -2  614.57   63.91
  -7  -3   2  698.02  125.40
  -7  -3   2  734.15  110.83
  -7   3   1 8224.09  232.95
   7   3  -1 7381.29  216.10
   7   3  -1 8068.48  231.40
  -7   3   1 8014.46  243.44
   7  -3  -1 8039.06  238.41
  -7  -3   1 7997.62  226.47
  -7  -3   1 8844.02  260.59
   7  -3  -1 7972.86  228.68
   7   3   0 3014.21  114.77
   7   3   0 2630.26   99.74
  -7   3   0 2350.46   80.68
  -7   3   0 2564.64   92.48
   7  -3   0 2477.22  106.82
   7  -3   0 2530.25   83.94
  -7  -3   0 2310.29   87.41
  -7  -3   0 2591.02   90.69
  -7   3  -1 1024.76  131.71
  -7   3  -1  819.64  155.90
   7   3   1  816.48   89.93
   7   3   1  755.58   96.30
   7  -3   1  930.95  125.23
   7  -3   1  832.01   77.64
  -7  -3  -1  808.71   96.08
  -7  -3  -1  777.35  122.46
  -7   3  -2  106.69   21.67
  -7   3  -2  133.38   29.73
   7   3   2  213.40   50.71
   7   3   2  153.04   36.44
  -7  -3  -2   72.12   21.02
  -7  -3  -2  187.74   33.34
   7  -3   2   33.21   41.55
   7  -3   2  150.50   29.61
   7   3   3 1331.31  151.95
   7   3   3 1743.55  144.93
  -7   3  -3 1368.81  156.80
  -7  -3  -3 1553.67  113.76
   7  -3   3 1680.71  123.60
   7  -3   3 1398.34  158.12
   7   3   4  181.28   51.77
   7   3   4  288.12   89.33
  -7   3  -4  218.92   54.16
  -7  -3  -4  289.96   70.76
   7  -3   4  294.61   86.64
   7  -3   4  134.31   33.90
   7   3   5 3069.57  186.25
   7   3   5 2395.50  181.67
  -7   3  -5 3201.11  120.75
  -7  -3  -5 2882.61  112.21
   7  -3   5 3211.55  120.38
   7  -3   5 2916.59  162.35
  -7   3  -6  485.48   72.71
   7   3   6  630.32  111.83
   7  -3   6  771.57  153.50
  -7  -3  -6  600.46  116.88
  -7   3  -7   25.59   12.37
   7   3   7   43.45   43.51
   7  -3   7   24.07   68.72
  -7  -3  -7   34.72   25.28
   7   3   8  422.55  152.24
  -7   3  -8  135.06   41.93
   7  -3   8  271.32  107.00
  -7  -3  -8  220.97   57.83
   7   3   9  123.45   92.24
   7  -3   9  233.26   96.45
   7   3  10  232.89  116.35
   7  -3  10  205.13  126.15
   7   5 -11    7.85   19.89
  -7   5  11  102.92   50.92
  -7  -5  11  145.45   60.81
   7   5 -10  944.37  281.70
  -7   5  10  834.33  350.82
  -7  -5  10 1992.59  191.98
  -7   5   9   77.63   47.39
   7   5  -9   84.70   26.92
   7  -5  -9   34.47   13.07
  -7  -5   9  216.23   79.27
   7   5  -8  340.39   96.16
  -7   5   8  401.90  135.18
   7  -5  -8  201.90   70.15
   7  -5  -8  244.03   66.93
  -7  -5   8  662.25  128.50
  -7   5   7   51.58   23.00
   7   5  -7   56.67   39.98
  -7   5   7  147.73   64.74
   7  -5  -7   46.40   16.60
  -7  -5   7   96.43   49.44
  -7   5   6  250.48   77.67
   7   5  -6  364.19   88.76
  -7   5   6  210.34   66.92
  -7  -5   6  278.68   65.19
   7  -5  -6  204.47   64.44
  -7  -5   6  346.49   91.12
   7   5  -5   59.46   20.18
  -7   5   5   64.76   26.67
  -7   5   5   63.33   40.83
   7  -5  -5   65.73   27.51
  -7  -5   5   55.16   28.30
  -7  -5   5  161.52   60.65
  -7   5   4 6366.00  271.60
   7   5  -4 6545.69  268.00
  -7   5   4 5779.24  229.92
  -7  -5   4 6107.95  249.34
   7  -5  -4 7047.74  284.97
  -7  -5   4 5928.30  253.29
  -7   5   3  480.22   95.22
   7   5  -3  615.76  107.46
  -7   5   3  469.66   82.03
   7   5  -3  301.49   77.38
  -7  -5   3  341.37   57.23
   7  -5  -3  401.35   60.01
  -7  -5   3  496.99   86.03
   7  -5  -3  374.25   74.75
  -7   5   2   42.57   28.79
  -7   5   2   11.37   12.12
   7   5  -2   52.62   26.43
   7   5  -2   20.25   23.66
   7  -5  -2   -5.38   18.46
  -7  -5   2   71.50   35.23
   7  -5  -2   16.08   16.82
  -7  -5   2  148.30   49.09
  -7   5   1   71.89   26.92
  -7   5   1   52.60   14.80
   7   5  -1   39.91   36.22
   7   5  -1   16.89   27.40
  -7  -5   1   60.59   21.76
   7  -5  -1   21.43   25.37
   7  -5  -1   93.48   31.81
  -7  -5   1   59.99   34.35
  -7   5   0 1085.44  102.75
   7   5   0 1312.10  157.65
  -7   5   0 1199.31  112.69
   7   5   0 1000.96  123.57
   7  -5   0 1353.40   91.36
  -7  -5   0 1072.70  132.92
   7  -5   0 1019.90  112.62
  -7  -5   0 1226.82  111.26
  -7   5  -1 1192.30  145.35
  -7   5  -1 1034.41  100.20
   7   5   1 1159.76  116.04
   7   5   1  956.33  108.57
   7  -5   1 1197.07  201.02
   7  -5   1 1074.15   97.55
  -7  -5  -1 1121.51  109.59
  -7  -5  -1 1147.50  104.79
  -7   5  -210038.88  416.60
  -7   5  -2 9147.66  386.23
   7   5   2 9284.19  400.10
   7   5   2 9454.81  393.21
   7  -5   2 9067.40  395.87
  -7  -5  -2 9649.34  426.05
   7  -5   2 9368.25  382.67
  -7  -5  -2 9201.34  382.71
  -7   5  -3 1400.32  103.66
   7   5   3 1154.89  106.82
   7   5   3 1304.80  101.36
   7  -5   3 1225.14  127.39
   7  -5   3 1251.31   90.17
  -7  -5  -3 1334.27  107.59
   7   5   4    3.97   17.02
   7   5   4   -9.82   43.29
  -7   5  -4   42.49   16.27
  -7  -5  -4   -8.91   19.98
   7  -5   4   47.92   38.24
   7  -5   4   39.49   21.11
  -7   5  -5  148.10   35.62
   7   5   5   99.70   65.95
   7   5   5  144.01   41.15
   7  -5   5  176.84   70.74
   7  -5   5  111.15   31.88
  -7  -5  -5   79.62   28.03
  -7   5  -6  457.54   68.59
   7   5   6  430.18   86.21
   7  -5   6  609.08  144.68
  -7  -5  -6  373.57   92.60
  -7   5  -7  564.56   89.85
   7   5   7  543.38  125.31
   7  -5   7  753.72  185.65
  -7  -5  -7  597.50  101.18
   7   5   8 6825.34  450.70
   7  -5   8 5595.39  373.91
  -7  -5  -8 5716.76  332.23
   7   5   9    1.18   65.57
   7  -5   9  -14.76   73.44
  -7  -5  -9   32.70   23.34
   7   5  10  294.38  111.13
   7  -5  10   44.79   54.77
  -7   7  11  132.70   58.18
  -7  -7  11   81.98   68.99
   7   7 -10  627.12  178.30
  -7   7  10  499.45  259.89
   7   7  -9  647.83  206.35
  -7   7   9  255.31  159.51
  -7  -7   9  753.58   77.92
  -7   7   8  755.84  261.23
   7   7  -8  775.56  208.83
   7  -7  -8  690.39  109.26
  -7  -7   8 1112.93  130.34
  -7   7   7 1635.38  280.19
   7   7  -7 1435.32  249.35
   7  -7  -7 1397.89  156.87
  -7  -7   7 1705.29  332.83
  -7   7   6  455.71  111.30
   7   7  -6  558.46  101.44
  -7   7   6  851.08   95.00
   7  -7  -6  547.91   80.25
  -7  -7   6  711.27  116.11
  -7   7   5  469.18   66.41
   7   7  -5  557.08  114.99
  -7   7   5  298.02   85.70
  -7  -7   5  389.43   88.05
   7  -7  -5  391.09   85.25
  -7  -7   5  398.80   95.48
  -7   7   4 3786.63  178.07
  -7   7   4 3259.99  137.05
   7   7  -4 3599.23  155.44
  -7  -7   4 3379.80  147.71
   7  -7  -4 3764.52  160.98
  -7  -7   4 3475.93  164.57
  -7   7   3 3044.74  151.54
   7   7  -3 3108.96  165.41
  -7   7   3 2674.92  116.48
   7   7  -3 2992.17  138.19
   7  -7  -3 2773.80  128.46
  -7  -7   3 3388.22  240.11
   7  -7  -3 2692.41  127.69
  -7  -7   3 2995.08  135.75
   7   7  -2 5281.82  185.45
  -7   7   2 5296.40  178.17
  -7   7   2 5474.61  197.45
   7   7  -2 5838.02  200.65
  -7  -7   2 5403.32  184.80
   7  -7  -2 5506.45  194.19
  -7   7   1 3405.14  133.28
  -7   7   1 2817.81  103.04
   7   7  -1 3445.21  133.19
   7   7  -1 3428.81  191.24
   7  -7  -1 3681.71  152.34
   7  -7  -1 3278.16  122.14
  -7  -7   1 3329.20  137.39
  -7  -7   1 3032.70  113.00
  -7   7   0 2302.79   96.74
  -7   7   0 2145.40   91.13
   7   7   0 1936.70   83.98
   7   7   0 2136.11   83.57
   7  -7   0 2763.60  309.52
  -7  -7   0 2005.73   88.23
   7  -7   0 2019.67  136.00
  -7  -7   0 2239.27  166.50
  -7   7  -1  351.06   51.25
   7   7   1  423.82   71.68
  -7   7  -1  284.72   44.75
   7   7   1  244.45   45.74
   7  -7   1  235.50   74.11
  -7  -7  -1  233.27   48.31
   7  -7   1  231.10   55.50
  -7  -7  -1  318.69   53.56
  -7   7  -2 7445.51  321.27
   7   7   2 8143.57  355.20
   7   7   2 7821.01  326.76
  -7   7  -2 8478.77  351.59
   7  -7   2 6613.17  304.11
   7  -7   2 7225.70  296.31
  -7  -7  -2 7971.65  335.94
  -7   7  -3 5876.78  237.58
   7   7   3 5093.37  229.32
   7   7   3 5606.43  232.87
   7  -7   3 5119.66  381.29
  -7  -7  -3 5625.28  235.40
   7  -7   3 5507.35  219.88
   7   7   4  253.81   71.13
   7   7   4  246.51   64.82
  -7   7  -4  301.28   65.98
  -7  -7  -4  414.17  103.69
   7  -7   4  577.43  120.97
   7  -7   4  164.24   52.22
  -7   7  -5 2225.13  105.12
   7   7   5 1975.69  140.95
   7  -7   5 2113.76  302.56
  -7  -7  -5 1917.86  103.47
  -7   7  -6 1115.46  124.27
   7   7   6 1402.64  192.10
   7  -7   6 1383.97  281.55
  -7  -7  -6 1210.33  177.11
  -7   7  -7 3123.81  201.76
   7   7   7 4205.63  329.44
   7  -7   7 4521.89  481.77
  -7  -7  -7 4618.94  312.47
   7   7   8 3421.13  241.25
   7  -7   8 3264.21  401.52
  -7  -7  -8 3919.23  237.24
   7   7   9 1614.59  216.65
   7  -7   9 1375.93  425.03
  -7  -7  -9 1806.34  147.79
   7   7  10  645.72  212.39
   7  -7  10  419.97  108.80
   7   9 -11   -0.28   28.30
  -7   9  11   45.42   49.99
  -7  -9  11   56.63   50.77
   7   9 -10 1376.16  255.80
  -7   9  10 1118.99  264.69
  -7  -9  10 1652.73  155.25
   7   9  -9  562.38  107.18
  -7  -9   9  816.46  139.16
   7   9  -8  374.76  106.26
  -7   9   8  358.33  132.24
  -7  -9   8  358.09  128.99
   7   9  -7  369.24  102.62
  -7   9   7  320.67  119.00
  -7  -9   7  321.24  117.33
  -7   9   6   72.08   44.33
   7   9  -6  297.58   60.83
   7  -9  -6  140.04   39.34
  -7  -9   6  308.89   64.44
  -7   9   5  353.04   97.57
   7   9  -5  614.14  109.15
  -7   9   5  697.28   91.53
   7  -9  -5  359.72  105.16
  -7  -9   5  633.81  134.47
  -7   9   411146.03  458.85
   7   9  -410772.69  431.72
   7  -9  -412658.06  503.75
  -7  -9   411153.92  456.73
  -7   9   3 2484.71  126.51
  -7   9   3 2683.91  115.90
   7   9  -3 2604.82  122.52
  -7  -9   3 2779.71  190.03
   7  -9  -3 2828.41  136.43
  -7  -9   3 2909.51  150.92
   7  -9  -3 2235.22  127.35
  -7   9   2  959.45  120.66
  -7   9   2  973.69  111.94
   7   9  -2 1168.67  152.90
   7   9  -2  844.38  115.31
   7  -9  -2 1190.03  170.42
   7  -9  -2  923.91  110.34
  -7  -9   2  924.66  133.99
  -7  -9   2  971.76  142.74
  -7   9   1  110.21   33.54
  -7   9   1  152.22   29.73
   7   9  -1  267.77   48.30
   7   9  -1  193.23   37.46
   7  -9  -1  215.90   45.26
   7  -9  -1  201.23   40.38
  -7  -9   1  124.57   39.46
  -7  -9   1  204.79   29.68
  -7   9   0  116.37   34.30
  -7   9   0   44.76   22.45
   7   9   0   75.82   28.24
   7   9   0   95.37   23.24
   7  -9   0   18.12   30.19
   7  -9   0   86.96   29.50
  -7  -9   0  159.79   40.12
  -7  -9   0   66.40   19.51
  -7   9  -1 8807.15  365.78
   7   9   110853.06  458.98
  -7   9  -1 7924.14  336.83
   7   9   1 8926.51  370.79
   7  -9   1 7738.93  344.60
  -7  -9  -1 9014.29  381.26
   7  -9   1 8523.65  350.21
  -7  -9  -1 7955.61  331.28
  -7   9  -213216.70  520.33
   7   9   214277.37  577.97
   7   9   212998.54  516.05
   7  -9   210895.22  456.58
  -7  -9  -212277.30  489.47
   7  -9   212939.06  506.59
  -7   9  -3 4389.00  180.08
   7   9   3 3918.28  183.57
   7  -9   3 5141.04  622.52
  -7  -9  -3 4207.63  182.31
  -7   9  -4  130.67   34.26
   7   9   4  128.69   43.06
   7  -9   4  218.43   90.18
  -7  -9  -4  274.02   66.50
   7  -9   4  120.74   28.28
   7   9   5  401.60   78.77
   7  -9   5  112.52   69.23
  -7  -9  -5  182.12   57.70
   7   9   6  225.18   99.24
   7  -9   6  154.39   77.80
  -7  -9  -6   87.57   39.25
   7   9   7 1651.18  306.94
   7  -9   7 1584.07  279.59
  -7  -9  -7 1557.87  219.52
   7   9   8 4575.52  302.22
   7  -9   8 4009.42  332.00
  -7  -9  -8 4440.21  270.15
   7   9   9 1851.77  468.36
   7  -9   9 1325.91  442.44
  -7  -9  -9 1971.41  170.42
  -7  -9 -10   39.15   23.41
   7  11 -11  -15.28   30.24
  -7 -11  11   69.03   61.12
   7  11 -10  814.49  201.64
  -7  11  10 1245.73  248.18
  -7 -11  10 1338.52  258.68
   7  11  -9  659.19  175.75
  -7  11   9  669.91  218.75
  -7 -11   9  924.89  154.42
   7  11  -8  103.91   50.42
  -7  11   8   87.49   49.28
  -7 -11   8   78.20   52.14
   7  11  -7  659.45  165.00
  -7  11   7  466.44  143.57
  -7 -11   7  899.62  119.07
   7  11  -6 3939.56  192.36
  -7  11   6 3644.65  248.92
  -7 -11   6 3659.88  227.80
  -7  11   5  352.49  109.05
   7  11  -5  338.74   95.87
   7 -11  -5  227.66   54.22
  -7 -11   5  556.85   78.98
   7  11  -4  324.29   95.28
  -7  11   4  218.88   47.20
  -7  11   4  241.93   87.96
   7 -11  -4  199.79   52.22
  -7 -11   4  221.27   63.31
   7  11  -3 1395.37  135.11
  -7  11   3 1501.95  132.12
  -7  11   3 1169.01  104.05
   7 -11  -3 1262.44  148.59
  -7 -11   3 1508.04  150.16
   7  11  -2   32.00   27.91
  -7  11   2   39.72   15.41
  -7  11   2   49.72   25.63
   7 -11  -2   -8.19   20.60
   7 -11  -2   27.04   18.35
  -7 -11   2   11.44   27.26
   7  11  -1 6015.23  260.84
  -7  11   1 6012.92  286.72
  -7  11   1 5910.51  256.61
   7 -11  -1 5426.14  246.58
   7 -11  -1 5402.90  232.01
  -7 -11   1 5248.31  233.18
   7  11   0 3219.68  151.14
  -7  11   0 3323.60  153.49
  -7  11   0 3212.07  145.12
   7 -11   0 4611.83  414.27
   7 -11   0 3475.11  153.45
  -7 -11   0 3711.56  171.47
   7  11   1  560.80  125.49
  -7  11  -1  336.93   60.05
  -7  11  -1  239.63   44.20
   7 -11   1  352.27   95.61
   7 -11   1  408.32   65.41
  -7 -11  -1  415.53   75.09
  -7  11  -2  625.41   53.52
   7  11   2  598.21   70.06
   7 -11   2  618.94  107.86
   7 -11   2  522.88  110.79
  -7 -11  -2  720.70   88.20
  -7  11  -3   86.90   28.86
   7  11   3  112.00   51.76
   7 -11   3  177.10   74.28
   7 -11   3   44.31   14.96
  -7 -11  -3   42.23   26.43
  -7  11  -4   12.04    7.74
   7  11   4   97.90   39.30
   7 -11   4  179.83   71.73
  -7 -11  -4   84.06   38.63
   7 -11   4   15.70    8.24
   7  11   5 9833.02  583.94
   7 -11   5 9595.29  729.42
  -7 -11  -5 8516.02  489.36
   7  11   6 4981.69  328.39
   7 -11   6 4151.98  517.11
  -7 -11  -6 4322.94  279.86
   7  11   7   23.51   38.31
   7 -11   7  183.91   86.75
  -7 -11  -7   86.20   43.01
   7  11   8  396.17  108.28
   7 -11   8  299.81  164.29
  -7 -11  -8  393.86   94.33
   7  11   9  165.74   87.04
  -7 -11  -9  113.40   58.55
   7  11  10  103.78   88.73
  -7  11 -10  310.01  105.35
  -7 -11 -10   87.42   47.55
   7  13 -11   20.78   35.29
  -7 -13  11   49.53   38.74
   7  13  -9  906.58  165.10
  -7  13   9 1067.33  194.07
  -7 -13   9  419.87  209.88
   7  13  -8  336.74   82.69
  -7  13   8  410.75  176.76
  -7 -13   8  489.88  125.65
   7  13  -7 3265.76  239.00
  -7  13   7 3250.77  265.61
  -7 -13   7 3459.99  270.47
   7  13  -6  124.20   48.79
  -7  13   6  187.61   56.00
  -7 -13   6   82.19   38.64
   7  13  -5  156.35   59.69
  -7  13   5   72.98   65.58
  -7 -13   5   91.90   51.01
   7  13  -4 2674.39  116.52
  -7  13   4 2396.71  174.31
  -7  13   4 2926.46  235.28
   7 -13  -4 2650.89  211.14
  -7 -13   4 2819.58  191.63
   7  13  -3 1130.57  102.57
  -7  13   3 1449.92  125.90
  -7  13   3 1182.08  176.87
   7 -13  -3 1134.07  132.87
  -7 -13   3 1099.94   96.99
   7  13  -2   38.42   26.95
  -7  13   2   60.07   20.15
  -7  13   2   59.63   29.04
   7 -13  -2   89.84   32.53
   7 -13  -2   41.32   18.35
  -7 -13   2  123.64   42.96
   7  13  -1 1530.79  130.56
  -7  13   1 1133.91  100.01
  -7  13   1 1455.65  164.70
   7 -13  -1 1372.39  152.14
   7 -13  -1 1288.25  113.16
  -7 -13   1 1442.33  117.73
   7  13   0 1053.75  123.25
  -7  13   0  906.20   77.83
  -7  13   0 1188.67   95.84
   7 -13   0 1317.50  176.49
   7 -13   0 1133.28   88.27
  -7 -13   0 1438.18  193.25
   7  13   1  164.92   43.27
  -7  13  -1   83.66   38.42
  -7  13  -1   35.90   26.84
   7 -13   1  139.89   44.96
   7 -13   1  118.97   22.64
  -7 -13  -1   68.61   39.81
  -7  13  -2 4692.45  265.95
   7  13   2 5681.95  309.90
   7 -13   2 5817.29  606.69
   7 -13   2 4469.38  231.61
  -7 -13  -2 4437.44  241.83
  -7  13  -3 1937.05  151.78
   7  13   3 2329.29  194.34
   7 -13   3 2107.67  272.61
  -7 -13  -3 2120.99  193.85
   7 -13   3 1901.83  138.49
   7  13   4   11.22   35.00
   7 -13   4   65.06   47.08
  -7 -13  -4   70.87   32.49
   7  13   5 3526.59  232.46
   7 -13   5 4495.12  632.05
  -7 -13  -5 3935.62  254.99
   7  13   6  197.11   88.90
   7 -13   6   78.76   49.54
  -7 -13  -6   97.46   37.40
   7  13   7  282.58  115.64
   7 -13   7  371.00  129.40
  -7 -13  -7  293.30  104.44
   7  13   8  557.46  303.81
  -7 -13  -8 1168.95  217.04
  -7  13  -9  104.96   45.86
  -7 -13  -9   32.26   28.99
   7  15 -10    3.37   30.97
  -7 -15  10   77.94   40.16
   7  15  -9  844.76  144.64
  -7 -15   9  684.10  204.30
   7  15  -8  402.67  107.33
  -7  15   8  475.08  123.49
  -7 -15   8  173.76  100.88
   7  15  -7   99.94   35.63
  -7  15   7   52.89   42.69
  -7 -15   7   86.77   50.25
   7  15  -6 3216.88  201.81
  -7  15   6 3267.08  319.08
  -7 -15   6 2988.11  199.28
   7  15  -5  376.45   79.17
  -7  15   5  263.20   89.40
  -7 -15   5  350.69   72.24
   7  15  -4  541.33  104.00
  -7  15   4  408.79   88.12
  -7  15   4  315.85   71.61
  -7  15   4  467.39  156.73
  -7 -15   4  479.85  115.29
   7  15  -3  844.48   92.75
  -7  15   3  680.47   56.73
  -7  15   3  839.12  130.54
   7 -15  -3 1003.68  119.08
  -7 -15   3  736.13   73.43
   7  15  -2 4832.23  282.25
  -7  15   2 5317.18  313.83
  -7  15   2 5541.90  309.98
   7 -15  -2 6195.67  474.32
  -7 -15   2 5022.99  277.16
   7  15  -1  963.89  165.07
  -7  15   1  578.46   55.59
  -7  15   1  716.78  122.08
   7 -15  -1  867.94  114.06
   7 -15  -1  648.49   63.39
  -7 -15   1  909.17   88.34
  -7  15   0 8388.37  442.07
   7  15   0 7949.71  416.44
   7 -15   0 9048.04  579.35
   7 -15   0 7856.95  406.43
  -7 -15   0 8550.16  452.45
  -7  15  -1 2367.76  212.68
   7  15   1 2157.66  175.20
   7 -15   1 2781.65  671.91
   7 -15   1 2210.52  166.89
  -7 -15  -1 2571.70  248.52
  -7  15  -2   76.89   28.20
   7  15   2   25.68   23.86
   7 -15   2  117.21   66.01
   7 -15   2   51.36   20.09
  -7 -15  -2   67.91   31.32
   7  15   3 2712.98  139.50
   7 -15   3 2614.19  401.46
  -7 -15  -3 2525.22  603.08
   7 -15   3 2078.79  150.82
   7  15   4 6066.01  373.26
   7 -15   4 5900.72  433.06
  -7 -15  -4 6051.04  359.18
   7  15   5   96.34   59.86
   7 -15   5  130.51   60.47
  -7 -15  -5  145.99   59.13
   7  15   6 3439.06  282.11
   7 -15   6 2979.83  538.21
  -7 -15  -6 3012.86  238.58
   7  15   7  566.33  128.17
  -7 -15  -7  868.71  143.79
   7  15   8  192.06   84.86
  -7  15  -8   93.27   39.77
  -7 -15  -8   88.64   49.06
   7  15   9 1654.67  235.74
  -7  15  -9 1652.46  207.66
  -7 -15  -9 1353.36  224.41
   7  17 -10   68.53   45.37
  -7 -17  10    9.18   35.95
   7  17  -9 1393.82  123.32
  -7 -17   9 1552.93  150.69
   7  17  -8   78.09   45.41
  -7 -17   8  113.92   69.52
   7  17  -7  494.89   74.84
  -7 -17   7  312.41  111.34
   7  17  -6  332.22   70.10
  -7  17   6   14.50   37.20
  -7 -17   6  251.33   65.36
   7  17  -5  342.71   68.80
  -7  17   5  143.82   67.12
  -7 -17   5  155.55   58.75
   7  17  -4   63.23   39.66
  -7  17   4   59.01   15.70
  -7  17   4   95.37   27.21
  -7  17   4   98.34   57.59
  -7 -17   4  205.82   63.46
  -7  17   3 7586.73  263.18
   7  17  -3 9060.23  327.10
  -7  17   3 8525.26  293.44
  -7  17   3 8663.24  330.64
  -7 -17   3 8365.79  309.42
  -7  17   2  520.57   56.85
   7  17  -2  497.91   80.52
  -7  17   2  377.39   93.22
  -7 -17   2  744.63  112.65
   7  17  -1 2123.37  170.43
  -7  17   1 1811.13  144.90
  -7  17   1 1988.88  205.71
   7 -17  -1 2218.36  283.55
   7 -17  -1 1913.66  151.58
  -7 -17   1 2311.85  251.33
   7  17   0 1315.40  190.44
  -7  17   0 1202.71  140.44
  -7  17   0 1274.03  180.48
   7 -17   0 1353.31  254.18
   7 -17   0  985.08   95.87
  -7 -17   0 1394.37  200.92
   7  17   1 1238.12  110.41
   7 -17   1 1180.42  184.98
   7 -17   1 1167.68   93.53
  -7 -17  -1 1452.92  143.13
   7  17   2  368.66   87.96
   7 -17   2  296.66  124.05
   7 -17   2  341.08   96.81
  -7 -17  -2  611.60   90.92
   7  17   3 3365.93  184.99
   7 -17   3 2734.68  459.85
   7 -17   3 2753.58  124.40
  -7 -17  -3 3002.68  279.89
   7 -17   3 2769.47  131.86
   7  17   4   31.92   35.27
   7 -17   4  258.90   75.49
  -7 -17  -4   92.20   52.21
   7  17   5  148.67   57.51
   7 -17   5  289.52   89.45
  -7 -17  -5   91.81   32.20
   7  17   6  889.06  131.42
  -7 -17  -6  714.58  144.43
   7  17   7 1469.43  230.37
  -7  17  -7 1069.35  245.59
  -7 -17  -7 1373.94  212.40
   7  17   8  141.29   85.64
  -7  17  -8  114.58   60.95
  -7 -17  -8  222.68   87.43
  -7  17  -9  568.16  254.90
  -7 -17  -9  594.46  209.30
   7  19 -10   68.65   38.20
  -7 -19  10  206.40   92.72
   7  19  -9   80.15   39.85
  -7 -19   9  226.27   92.05
   7  19  -8  149.52   71.29
  -7 -19   8  174.37   73.74
   7  19  -7  426.16  102.65
  -7 -19   7  308.02  143.63
   7  19  -6 1171.41  181.67
  -7 -19   6 1246.28  142.14
   7  19  -5  484.22  129.51
  -7 -19   5  549.13  152.85
  -7  19   4  657.93   98.80
   7  19  -4  479.09   94.76
  -7  19   4  691.54  104.56
  -7 -19   4  701.83  110.37
  -7  19   3  581.05   89.48
   7  19  -3  676.89  102.74
  -7  19   3  652.62   83.79
  -7  19   3  862.56  128.58
  -7 -19   3  599.74  107.76
  -7  19   2 1140.96  142.80
   7  19  -2 1209.98  205.72
  -7  19   2 1279.34  186.18
  -7 -19   2 1210.88  194.34
   7  19  -1 1333.35  176.57
  -7  19   1 1386.81  147.76
   7 -19  -1 1171.66  102.27
  -7 -19   1 1509.70  213.68
  -7  19   0 2325.56  192.70
   7  19   0 2334.82  187.05
   7 -19   0 2434.53  186.01
  -7 -19   0 2733.02  129.22
   7  19   1   55.03   34.79
   7 -19   1   20.38   16.71
  -7 -19  -1   57.46   44.98
   7  19   2 1685.59  465.32
   7 -19   2 1335.07  177.15
  -7 -19  -2 1752.28  151.55
   7  19   3  200.05   55.61
   7 -19   3  141.03   41.22
  -7 -19  -3  260.79   77.90
   7 -19   3   89.59   29.77
   7  19   4  142.14   65.79
  -7  19  -4  154.09   70.70
  -7 -19  -4  125.50   59.84
   7  19   5 1998.81  168.90
  -7  19  -5 2177.49  187.83
  -7 -19  -5 1796.79  212.10
   7  19   6   36.14   37.94
  -7  19  -6   17.06   42.16
  -7 -19  -6   26.12   40.45
   7  19   7   16.84   55.42
  -7  19  -7   60.77   44.72
  -7 -19  -7  113.10   56.92
   7  19   8  795.08  204.28
  -7  19  -8  689.85  179.48
  -7 -19  -8  615.98  183.69
   7  21  -9  323.71   88.42
  -7 -21   9  390.97  104.07
   7  21  -8  496.26  179.72
  -7 -21   8  712.26  160.82
   7  21  -7 1418.11  272.18
  -7 -21   7 1319.85  295.96
   7  21  -6  124.85   45.47
  -7 -21   6  270.81   90.60
   7  21  -5  175.82   49.98
  -7 -21   5  166.87   62.64
   7  21  -4 3946.87  247.45
  -7  21   4 3932.25  226.30
  -7 -21   4 3509.98  222.81
  -7  21   3  132.53   43.62
   7  21  -3   99.22   46.36
  -7  21   3   96.10   37.83
  -7 -21   3  122.08   47.64
  -7  21   2   26.22   16.42
   7  21  -2   85.36   31.56
  -7  21   2   76.33   31.04
  -7 -21   2  167.91   49.89
   7  21  -1 7818.39  454.31
  -7  21   1 7746.50  442.13
  -7 -21   1 8108.82  472.71
   7  21   0  404.83   85.83
  -7  21   0  472.52   80.05
   7 -21   0  351.66   62.47
  -7 -21   0  522.16   95.45
   7  21   1  283.68   59.94
  -7  21  -1  409.46   67.54
  -7 -21  -1  270.36   81.11
   7  21   2 3866.93  242.11
  -7  21  -2 4081.76  247.89
   7 -21   2 3744.97  226.09
  -7 -21  -2 3955.23  335.48
   7 -21   2 4311.97  249.91
   7  21   3  514.04  140.39
  -7  21  -3  223.38   68.97
   7 -21   3   71.23   28.01
  -7 -21  -3  200.15   69.61
   7 -21   3   96.98   29.43
   7  21   4  263.60   83.76
  -7  21  -4  178.41   59.81
  -7 -21  -4  117.72   34.01
   7  21   5 4804.45  299.93
  -7  21  -5 5329.13  325.38
  -7 -21  -5 4559.53  279.95
   7  21   6  245.34   66.49
  -7  21  -6  275.14   76.94
  -7 -21  -6  374.32   93.75
   7  21   7   75.25   81.30
  -7  21  -7   93.87   43.99
  -7 -21  -7   98.23   42.82
   7  21   8 1304.69  204.99
  -7  21  -8 1219.97  204.68
  -7 -21  -8 1016.61  348.68
  -7 -23   9  187.78   82.22
   7  23  -8   19.35   30.40
  -7 -23   8  102.50   53.98
   7  23  -7 1330.27  295.79
  -7 -23   7 1499.44  140.45
   7  23  -6  958.00  210.62
  -7 -23   6 1333.43  204.30
   7  23  -5   97.42   38.80
   7  23  -4   80.26   42.68
  -7  23   4   12.85    7.84
  -7 -23   4   90.49   62.45
   7  23  -3 3030.52  239.29
  -7  23   3 3131.56  218.66
  -7 -23   3 2744.26  221.61
   7  23  -2 1203.16  208.38
  -7  23   2 1420.32  162.07
  -7 -23   2 1118.75  134.81
  -7  23   1 1095.35  132.59
   7  23  -1 1561.99  248.41
  -7  23   1 1380.67  148.10
  -7 -23   1 1503.34  297.79
   7  23   0 3554.52  225.80
  -7  23   0 3325.59  204.08
   7 -23   0 2952.70  184.02
  -7 -23   0 3343.04  296.18
   7  23   1   -7.78   37.80
  -7  23  -1   40.82   34.05
  -7 -23  -1   15.28   31.96
   7 -23   1   27.98   26.44
   7  23   2  174.89   64.76
  -7  23  -2  306.98   68.82
  -7 -23  -2  230.35   70.79
   7 -23   2  176.18   48.11
   7  23   3  801.87  193.68
  -7  23  -3 1236.81  138.55
  -7 -23  -3  997.49  120.26
   7 -23   3 1128.04  121.02
   7  23   4 1614.09  121.74
  -7  23  -4 1461.75   94.95
  -7 -23  -4 1498.07  208.75
   7  23   5  588.22  117.99
  -7  23  -5  997.35  158.82
  -7 -23  -5  683.79  124.06
   7  23   6 1328.90  235.06
  -7  23  -6 1179.29  306.81
  -7 -23  -6  982.62  261.03
   7  23   7   82.26   37.86
  -7  23  -7  126.87   71.61
  -7 -23  -7   -3.87   33.44
  -7  23  -8  123.13   59.75
  -7 -23  -8   16.25   58.26
   7  25  -8  118.11   67.47
  -7 -25   8   59.05   50.88
   7  25  -7  105.54   46.02
  -7 -25   7  169.96   67.18
   7  25  -6  159.57   76.97
  -7 -25   6   69.99   51.96
   7  25  -5  138.92   63.84
  -7 -25   5   55.45   40.74
   7  25  -4 1027.85   75.65
  -7 -25   4 1266.45  148.86
   7  25  -3  506.64   78.03
  -7  25   3  883.20   94.05
  -7 -25   3  991.19  138.29
   7  25  -2  142.61   59.83
  -7 -25   2   81.16   42.65
   7  25  -1 3007.95  229.28
  -7  25   1 2810.98  251.41
  -7 -25   1 2629.25  343.86
   7  25   0  424.78   84.58
  -7  25   0  345.00   68.76
  -7 -25   0  278.75   66.71
   7 -25   0  220.84   56.05
   7  25   1  186.36   69.51
  -7  25  -1   76.35   31.04
  -7 -25  -1  125.66   55.44
   7 -25   1  183.94   39.62
   7  25   2 2438.45  173.43
  -7  25  -2 2267.91  220.45
  -7 -25  -2 2083.38  177.67
   7 -25   2 2323.61  146.35
   7  25   3  479.67  108.81
  -7  25  -3  678.16  146.87
  -7 -25  -3  602.48  135.05
   7  25   4  512.77  158.70
  -7  25  -4  683.81  120.02
  -7 -25  -4  588.31  155.90
   7  25   5  917.83  165.82
  -7  25  -5 1067.15  189.67
  -7 -25  -5 1338.46  230.94
   7  25   6  228.19   78.83
  -7  25  -6  146.89   89.02
  -7 -25  -6  501.88  136.19
   7  25   7  106.28   59.96
  -7  25  -7  188.10   67.45
  -7 -25  -7  176.58   63.32
   7  27  -8  271.67   89.10
  -7 -27   8   85.97   29.10
   7  27  -7  245.95   82.41
  -7 -27   7  323.41   88.91
   7  27  -6  265.41  106.52
  -7 -27   6  125.73   70.54
   7  27  -5  231.13   87.78
  -7 -27   5  204.48   81.17
   7  27  -4  750.09  121.88
  -7 -27   4  652.41  159.92
   7  27  -3  598.94  143.83
  -7  27   3  391.05  100.94
  -7 -27   3  539.09  151.36
   7  27  -2  193.47   72.00
  -7  27   2  245.50   58.57
  -7 -27   2  268.71   86.90
   7 -27  -2  142.42   52.29
   7  27  -1  775.08  115.13
  -7  27   1  763.51  125.85
  -7 -27   1  701.71  165.08
   7 -27  -1  930.57  108.82
   7  27   0  565.39  100.52
  -7  27   0  532.81   96.77
  -7 -27   0  343.46  103.02
   7 -27   0  449.93  109.51
   7  27   1  442.85  143.18
  -7  27  -1  694.64  174.35
  -7 -27  -1  871.18   99.01
   7 -27   1  469.24  127.40
   7  27   2 1416.16  101.07
  -7  27  -2 1223.80   80.25
  -7 -27  -2 1106.55  113.50
   7 -27   2 1327.63   66.48
   7  27   3  222.83   59.05
  -7  27  -3  190.00   55.11
  -7 -27  -3  464.59  101.65
   7  27   4  297.57   96.97
  -7  27  -4  320.27   85.98
  -7 -27  -4  180.80   75.89
   7  27   5 1232.01  239.90
  -7  27  -5 1170.33  256.64
  -7 -27  -5 1269.61  321.79
   7  27   6  135.35   54.54
  -7  27  -6  391.38  105.13
  -7 -27  -6  295.56   86.32
   7  29  -7   95.82   30.58
  -7 -29   7  153.13   46.53
   7 -29  -7   41.58   40.51
   7  29  -6  691.93  246.26
  -7 -29   6  448.48  199.52
   7 -29  -6  978.77  232.24
   7  29  -5  -64.36   45.79
  -7 -29   5   15.56   41.89
   7 -29  -5   96.82   66.45
   7  29  -4 2180.37  312.63
  -7 -29   4 1804.32  338.30
   7 -29  -4 2143.63  183.74
   7  29  -3  135.27   72.32
  -7 -29   3   51.23   36.49
   7 -29  -3   56.73   50.88
   7  29  -2  170.78   47.88
  -7  29   2  236.35   51.63
  -7 -29   2  161.77   62.11
   7 -29  -2  178.99   64.22
   7  29  -1   90.79   64.65
  -7  29   1   33.69   27.45
  -7 -29   1    7.90   30.03
   7 -29  -1   19.96   18.37
   7  29   0    5.45   36.60
  -7  29   0   61.29   26.08
  -7 -29   0  119.74   65.43
   7 -29   0   20.99   15.83
   7  29   1  161.40   66.20
  -7  29  -1   53.80   15.38
  -7 -29  -1  157.63   62.27
   7 -29   1   40.74   28.57
   7  29   2 3748.22  295.12
  -7  29  -2 4063.08  366.79
  -7 -29  -2 4084.27  323.10
   7  29   3   16.69   41.04
  -7  29  -3  269.73   84.66
  -7 -29  -3  151.74   73.61
   7  29   4  -36.37   38.62
  -7  29  -4  114.60   46.23
  -7 -29  -4  132.64   61.01
   7  29   5   69.15   48.51
  -7  29  -5  285.92   89.40
  -7 -29  -5   81.99   60.24
   7  29   6   69.09   54.85
  -7  29  -6   -6.57   53.04
  -7 -29  -6   50.34   42.12
   7  31  -6  423.81  123.66
  -7 -31   6  328.83  120.96
   7 -31  -6  284.29   73.20
   7  31  -5  984.24  276.07
  -7 -31   5  728.83  195.84
   7 -31  -5  742.26  235.19
   7  31  -4  150.18   59.20
  -7 -31   4    6.77   38.38
   7 -31  -4   73.28   46.17
   7  31  -3 2368.11  307.40
  -7 -31   3 2386.69  319.30
   7 -31  -3 3004.20  239.96
   7  31  -2   75.40   25.72
  -7 -31   2   36.45   43.67
   7 -31  -2   72.26   29.24
   7  31  -1   54.93   21.24
  -7  31   1   36.93   29.46
  -7 -31   1   84.29   29.04
   7 -31  -1   52.90   32.64
   7  31   0 1113.00  348.50
  -7  31   0 1521.93  194.93
  -7 -31   0 1624.29  150.98
   7 -31   0 1397.64  177.20
   7  31   1 1056.28  361.51
  -7  31  -1 1852.31  221.53
  -7 -31  -1 1609.02  239.83
   7  31   2   98.88   60.13
  -7  31  -2   90.92   41.70
  -7 -31  -2   59.24   45.07
   7  31   3 1917.60  316.06
  -7  31  -3 2286.51  371.64
  -7 -31  -3 1628.42  363.93
   7  31   4  109.75   86.62
  -7  31  -4  251.75   97.56
  -7 -31  -4  421.82  107.92
   7  31   5   -9.82   46.71
  -7  31  -5   81.39   54.08
  -7 -31  -5  141.49   73.06
   7  33  -5   71.41   48.97
   7 -33  -5   68.31   27.04
  -7 -33   4  369.81  109.06
   7 -33  -4  219.98   77.40
   7  33  -3  643.43  153.12
  -7 -33   3  495.76  152.73
   7 -33  -3  490.63  133.14
   7  33  -2   82.42   60.63
  -7 -33   2   55.21   57.98
   7 -33  -2   31.37   31.71
   7  33  -1  619.32  152.21
  -7 -33   1  712.10  206.60
   7 -33  -1  620.88  150.70
   7  33   0  282.85   86.08
  -7  33   0  141.18   52.27
  -7 -33   0  337.12  121.67
   7 -33   0  168.58   63.76
   7  33   1  142.66   63.14
  -7  33  -1   86.38   36.70
  -7 -33  -1  127.77   61.73
   7  33   2   87.05   46.23
  -7  33  -2   52.09   37.67
  -7 -33  -2  106.51   58.42
   7  33   3  173.93   56.93
  -7  33  -3  250.21   85.24
  -7 -33  -3  300.51   95.91
   7  33   4  106.56   46.73
  -7  33  -4  199.43   92.79
  -7 -33  -4   85.04   53.33
   7  35  -3  178.50   57.67
   7 -35  -3  218.99   96.80
   7  35  -2   18.93   34.87
  -7 -35   2   17.30   43.34
   7 -35  -2   69.43   39.04
  -7 -35   1  292.30   92.21
   7 -35  -1  117.08   46.98
   7  35   0  150.71   70.30
  -7  35   0  148.23   71.35
  -7 -35   0  301.34   97.93
   7  35   1  152.43   50.62
  -7  35  -1  238.58   68.06
  -7 -35  -1  178.65   74.47
   7  35   2  338.13  112.89
  -7  35  -2  331.77  118.98
  -7 -35  -2  169.16   69.22
  -8   0  11  -47.05   54.45
  -8   0  10  169.93   76.23
   8   0  -9   15.59   11.77
  -8   0   9   50.16   44.87
   8   0  -8  308.16   80.72
  -8   0   8  282.14   79.53
   8   0  -7   28.77   17.60
  -8   0   7   18.61   14.61
  -8   0   7   31.29   38.50
   8   0  -610348.41  459.69
  -8   0   6 7452.31  334.71
  -8   0   6 9678.97  446.42
   8   0  -5  -10.27   17.66
  -8   0   5   16.55   19.33
  -8   0   5  133.90   54.24
   8   0  -4 1093.89   89.18
  -8   0   4 1075.57   82.57
  -8   0   4 1315.78  154.79
   8   0  -3   22.59   17.72
  -8   0   3   12.75   14.25
  -8   0   3    7.77   28.34
   8   0  -2 2189.95  111.98
  -8   0   2 1861.31   89.84
  -8   0   2 1892.03  105.51
   8   0  -2 1785.67   89.88
   8   0  -1   77.28   36.45
  -8   0   1   -6.92    9.31
  -8   0   1   71.22   34.04
   8   0  -1   82.45   28.32
   8   0   013289.33  555.41
  -8   0   013149.73  539.41
  -8   0   014045.61  578.76
   8   0   013951.75  570.89
   8   0   1   83.60   44.07
  -8   0  -1   54.81   29.12
  -8   0  -1    4.07   21.95
   8   0   1   31.30   21.95
   8   0   2  957.59  107.89
  -8   0  -2  924.89   76.59
   8   0   2  868.28   83.97
   8   0   3   78.99   61.56
  -8   0  -3   63.33   31.28
   8   0   3   10.04   13.68
   8   0   4  927.44  112.58
  -8   0  -4  989.66   82.90
   8   0   4 1029.91   86.82
   8   0   5   25.64   42.60
  -8   0  -5   -0.06   15.84
   8   0   5   32.08   22.91
   8   0   6 3675.13  248.71
  -8   0  -6 4229.17  249.79
   8   0   7   78.18   38.62
  -8   0  -7   68.09   34.94
   8   0   8  515.21  141.45
  -8   0  -8  756.51  114.51
   8   0   9  308.75  146.18
   8   0  10  370.38  134.59
  -8   2  11  122.21   70.30
  -8  -2  11   17.83   50.10
   8   2 -10  890.98  200.40
  -8   2  10  252.18  219.60
  -8  -2  10 1616.92  176.38
   8   2  -9  404.92  103.84
  -8   2   9  532.10  115.81
   8  -2  -9  371.27   67.05
  -8  -2   9  547.20  113.55
  -8   2   8  377.39  104.11
   8   2  -8  226.21   55.52
   8  -2  -8  249.72   64.38
  -8  -2   8  432.78  109.04
   8   2  -7 5081.76  299.33
  -8   2   7 3763.03  220.47
  -8   2   7 4564.08  285.84
   8  -2  -7 4519.36  265.07
  -8  -2   7 4495.89  280.13
   8   2  -6 9239.33  413.72
  -8   2   6 8463.15  393.44
  -8   2   6 6688.78  300.18
  -8  -2   6 6438.67  291.74
  -8  -2   6 9041.39  420.93
   8  -2  -6 8497.98  378.49
  -8   2   5  799.61   90.61
   8   2  -5  830.52  144.92
  -8  -2   5  486.99   76.90
  -8  -2   5  565.47   73.54
   8  -2  -5  560.49   55.21
  -8   2   4 4509.51  202.55
   8   2  -4 4384.22  185.90
  -8  -2   4 4430.12  184.40
  -8  -2   4 4666.48  209.59
   8  -2  -4 3975.06  167.10
  -8   2   3 3363.12  158.79
   8   2  -3 2791.92  200.36
  -8   2   3 3059.00  631.18
  -8  -2   3 2989.68  213.21
   8  -2  -3 3677.03  162.06
  -8  -2   3 3362.47  225.09
  -8   2   2 6921.13  289.14
   8   2  -2 5988.97  255.19
   8   2  -2 6811.63  288.29
  -8   2   2 6405.35  278.65
   8  -2  -2 7354.60  314.71
  -8  -2   2 6418.52  273.38
  -8  -2   2 6762.08  292.81
   8  -2  -2 6380.24  270.93
   8   2  -1 7385.97  317.58
  -8   2   1 6464.52  287.26
   8   2  -1 6997.04  295.38
  -8   2   1 6611.25  277.68
  -8  -2   1 6935.16  298.41
   8  -2  -1 6378.20  278.44
  -8  -2   1 6918.29  290.05
   8  -2  -1 6733.16  284.91
   8   2   0 8671.73  371.30
  -8   2   0 8325.96  350.78
  -8   2   0 7923.94  330.74
   8   2   0 8345.37  347.16
  -8  -2   0 8767.76  370.24
   8  -2   0 7877.01  338.79
   8  -2   0 8585.99  356.97
  -8  -2   0 8244.72  343.93
  -8   2  -1   66.39   31.11
   8   2   1  153.18   58.52
  -8   2  -1   58.98   23.44
   8   2   1  138.98   34.29
  -8  -2  -1   95.85   24.12
  -8  -2  -1  187.91   38.27
   8  -2   1  259.87   69.17
   8  -2   1  118.21   27.74
   8   2   2 7327.17  296.09
   8   2   2 6780.44  291.86
  -8   2  -2 7387.32  300.13
  -8  -2  -2 7029.44  287.64
   8  -2   2 8387.03  445.05
   8  -2   2 7341.80  294.61
   8   2   3  859.64   73.78
   8   2   3 1101.24  116.62
  -8   2  -3  955.76  104.65
  -8  -2  -3  947.99  118.21
   8  -2   3 1027.57  144.14
   8  -2   3  619.71  120.02
   8   2   4 4441.98  209.31
  -8   2  -4 4262.42  159.46
   8   2   4 3969.18  151.68
   8  -2   4 4222.85  207.50
  -8  -2  -4 4297.59  163.81
   8  -2   4 3821.71  143.00
   8   2   5 2478.71  179.99
  -8   2  -5 2311.85  113.06
   8   2   5 1676.65  460.31
   8  -2   5 2035.47  260.34
  -8  -2  -5 2242.11  118.17
   8  -2   5 1900.11   97.38
   8   2   6 5018.09  338.68
  -8   2  -6 5081.99  295.67
  -8  -2  -6 5634.11  328.92
   8  -2   6 3736.06  434.81
  -8   2  -7    0.09   11.77
   8   2   7   36.30   51.40
   8  -2   7  140.22   75.81
  -8  -2  -7    2.46   11.73
   8   2   8 1298.86  232.43
   8  -2   8 1656.28  369.45
  -8  -2  -8 1309.15  185.43
   8   2   9   67.71   46.48
   8  -2   9   48.72   74.74
   8   2  10 1210.57  337.45
   8  -2  10 1116.40  258.03
   8   4 -10 3568.40  266.77
  -8   4  10 3773.27  302.89
  -8  -4  10 4293.90  347.88
   8   4  -9   42.04   24.24
  -8   4   9   35.36   40.49
  -8  -4   9   17.03   41.72
  -8   4   8 5640.42  359.93
   8   4  -8 5071.10  308.57
   8  -4  -8 4265.07  256.68
  -8  -4   8 4642.32  301.57
  -8   4   7 1541.61  179.42
   8   4  -7 1292.94  159.09
   8  -4  -7 1484.09  156.22
  -8  -4   7 1517.34  173.55
  -8   4   6 1103.41  152.72
   8   4  -6 1220.42  152.69
  -8  -4   6  606.70  136.85
  -8  -4   6 1391.56  203.51
   8  -4  -6 1153.39  143.14
   8   4  -5  242.78   62.83
  -8   4   5   31.34   17.89
  -8   4   5  196.15   70.75
   8  -4  -5  112.81   41.75
  -8  -4   5   96.18   38.97
  -8  -4   5  124.78   67.55
  -8   4   413999.76  724.35
   8   4  -415316.62 3121.80
  -8   4   412317.11  627.66
  -8  -4   413548.05  691.79
   8  -4  -416190.16 3299.74
  -8  -4   413893.60  717.77
  -8   4   3  822.65  101.10
   8   4  -3  663.30   90.08
  -8   4   3  567.59  131.28
  -8  -4   3  517.43  140.80
   8  -4  -3  727.31  115.24
  -8  -4   3  611.17   71.16
  -8   4   2 7370.05  318.90
   8   4  -2 6419.51  272.98
  -8   4   2 7373.83  306.94
  -8  -4   2 6534.18  274.45
   8  -4  -2 6929.47  297.80
   8  -4  -2 7362.87  312.20
  -8  -4   2 7178.42  309.59
  -8   4   1 6592.52  287.03
   8   4  -1 5224.28  226.71
  -8   4   1 6047.82  254.78
   8   4  -1 6305.09  268.30
  -8  -4   1 5571.77  235.71
  -8  -4   1 6391.05  277.04
   8  -4  -1 5526.66  244.55
   8  -4  -1 5842.70  247.78
  -8   4   0 2908.14  137.27
   8   4   0 3326.21  162.39
  -8   4   0 2465.67  115.12
   8   4   0 2832.43  128.37
   8  -4   0 3695.33  188.85
   8  -4   0 2912.82  132.28
  -8  -4   0 2734.74  131.92
  -8  -4   0 3111.01  141.68
   8   4   1   35.66   32.36
  -8   4  -1   39.33   23.31
   8   4   1   18.56   19.96
  -8   4  -1   31.56   27.23
   8  -4   1  233.99   63.98
  -8  -4  -1   48.56   26.29
   8  -4   1   62.18   22.36
  -8   4  -213713.12  542.59
   8   4   212688.73  501.91
   8  -4   213594.31  608.19
  -8  -4  -212827.01  510.09
   8  -4   213051.40  513.21
  -8   4  -3  404.70  118.45
   8   4   3  289.49   72.95
   8   4   3  309.44   95.60
   8  -4   3  476.69   80.41
   8  -4   3  119.70   61.22
  -8  -4  -3  348.44   80.72
   8   4   4 3698.33  142.31
   8   4   4 4437.93  213.65
  -8   4  -4 4434.40  166.14
  -8  -4  -4 3877.41  149.04
   8  -4   4 3660.10  252.75
   8  -4   4 3341.29  124.38
   8   4   5 2820.02  198.02
  -8   4  -5 2546.75  550.43
   8   4   5 1974.13  222.28
   8  -4   5 2750.04  207.80
  -8  -4  -5 3083.25  189.06
  -8   4  -6  777.13  107.26
   8   4   6  723.61  115.05
   8  -4   6 1108.04  306.70
  -8  -4  -6  914.76  146.82
  -8   4  -7    7.90    6.25
   8   4   7  111.08   67.36
   8  -4   7  218.09  111.72
  -8  -4  -7   96.48   37.41
   8   4   8 7326.03  463.73
   8  -4   8 6304.12  393.52
  -8  -4  -8 6744.90  371.90
   8   4   9  754.10  418.99
   8  -4   9  942.91  334.14
   8  -4  10  640.54  236.05
  -8   6  11  128.53   61.93
  -8  -6  11  135.83   50.65
  -8   6  10   89.79   53.19
  -8  -6  10   27.92   46.85
   8   6  -9 3485.28  204.04
  -8   6   9 3628.87  238.71
  -8  -6   9 3649.30  238.08
  -8   6   8  642.55  194.54
   8   6  -8  604.21  155.52
   8  -6  -8  679.04   75.99
  -8  -6   8  952.66  122.22
  -8   6   7 1227.34  139.83
   8   6  -7 1462.81  156.41
  -8   6   7 1684.71  200.78
   8  -6  -7 1582.40  194.05
  -8  -6   7 1390.94  162.62
  -8   6   6  695.80   88.26
   8   6  -6  765.16  140.27
  -8   6   6  888.50  126.39
   8  -6  -6  569.04  135.77
  -8  -6   6  854.28  124.70
  -8   6   5 1024.20   96.89
   8   6  -5 1540.65  145.26
  -8   6   5 1415.70  126.26
   8  -6  -5 1436.35  173.59
  -8  -6   5 1439.27  130.59
  -8   6   4   36.69   31.24
   8   6  -4   34.08   18.09
  -8   6   4   44.75   14.62
  -8  -6   4   68.32   30.53
   8  -6  -4  139.24   42.43
  -8  -6   4   22.38   30.00
  -8   6   3 7830.75  327.92
   8   6  -3 8086.71  329.71
  -8   6   3 7183.80  286.65
  -8  -6   3 6970.75  282.11
   8  -6  -3 7454.00  305.37
  -8  -6   3 7700.82  322.29
  -8   6   2   12.08   24.99
  -8   6   2   92.73   24.74
   8   6  -2   58.03   24.62
  -8  -6   2   85.05   28.94
   8  -6  -2  102.26   30.03
   8  -6  -2   63.06   24.03
  -8  -6   2  170.74   56.01
  -8   6   1 2005.74  148.47
  -8   6   1 1801.68   86.88
   8   6  -1 1831.82   96.58
  -8  -6   1 1849.33  104.76
   8  -6  -1 2163.26  127.26
   8  -6  -1 1858.26   91.04
  -8  -6   1 2114.73  167.86
   8   6   0  161.78   51.87
  -8   6   0  175.01   37.13
   8   6   0  137.22   31.16
  -8   6   0  142.47   34.47
   8  -6   0  124.29   52.41
  -8  -6   0   47.58   24.98
   8  -6   0  160.72   32.02
   8   6   1 6027.20  264.71
  -8   6  -1 5477.09  234.87
   8   6   1 4996.74  208.88
  -8   6  -1 5223.31  217.28
   8  -6   1 5519.37  326.51
  -8  -6  -1 4897.58  207.48
   8  -6   1 5310.11  218.30
  -8   6  -2 2713.16  194.43
   8   6   2 2572.01  194.16
   8   6   2 2351.10  169.25
   8  -6   2 2643.26  213.41
   8  -6   2 2432.14  171.75
  -8  -6  -2 2559.19  185.92
  -8   6  -3 9792.87  502.80
   8   6   3 8342.22  450.47
   8   6   3 8533.94  444.77
   8  -6   3 8215.92  449.21
   8  -6   3 8764.29  447.59
  -8  -6  -3 9423.40  490.82
  -8   6  -4  364.29   93.65
   8   6   4  461.13  143.03
   8  -6   4  330.02  100.42
  -8  -6  -4  401.99  107.49
   8  -6   4  359.16   78.61
  -8   6  -5  224.23   50.35
   8   6   5  170.77   65.82
   8  -6   5  209.33  102.91
  -8  -6  -5  234.27   58.42
   8  -6   5   65.73   28.02
  -8   6  -6    1.29    6.86
   8   6   6  197.15   95.95
   8  -6   6   72.77   66.21
  -8  -6  -6  181.33   65.24
   8   6   7 3651.99  272.22
   8  -6   7 4216.86  472.83
  -8  -6  -7 3872.30  242.75
   8   6   8  952.68  179.64
   8  -6   8  843.56  208.55
  -8  -6  -8 1042.85  177.18
   8   6   9 2023.56  356.21
   8  -6   9 1786.43  543.16
  -8  -6  -9 1938.53  312.18
   8   6  10    6.12   48.42
   8  -6  10  -58.99   78.10
   8   8 -11   74.65   35.25
  -8   8  11  -83.21   42.77
  -8  -8  11   84.75   70.23
  -8   8  10   25.62   26.31
  -8  -8  10  162.43   70.29
  -8   8   9 2384.01  359.39
  -8  -8   9 3241.18  210.38
   8   8  -8  804.35  121.92
  -8   8   8  495.14  163.38
  -8  -8   8  658.39  198.79
  -8   8   7   85.69   62.11
   8   8  -7   21.60   14.88
   8  -8  -7   10.82   11.20
  -8  -8   7   35.57   38.31
   8   8  -6 2630.40  569.52
  -8   8   6 1840.61  203.28
  -8   8   6 2531.01  553.61
  -8  -8   6 2328.36  276.27
  -8   8   5  170.50   43.26
   8   8  -5  137.26   44.42
  -8   8   5  291.91   83.18
   8  -8  -5  131.04   34.73
  -8  -8   5   94.90   63.14
  -8   8   4 1308.51  117.49
   8   8  -4 1453.91  131.69
  -8   8   4 1280.15  114.62
   8  -8  -4 1785.56  151.40
  -8  -8   4 1461.04  129.51
   8   8  -311092.61  445.76
  -8   8   310739.22  423.57
  -8   8   310616.75  435.05
   8  -8  -312772.52  518.29
  -8  -8   311168.80  457.95
  -8   8   2 2146.25  153.60
   8   8  -2 2338.43  178.72
  -8   8   2 2488.62  187.96
   8  -8  -2 2724.14  205.53
  -8  -8   2 2439.99  184.42
   8  -8  -2 2110.58  156.73
  -8   8   1  218.04   38.14
   8   8  -1  145.58   40.45
  -8   8   1  163.15   45.41
   8  -8  -1  250.58   59.25
   8  -8  -1  221.14   56.51
  -8  -8   1  195.84   46.35
   8   8   0 1197.03  102.36
  -8   8   0 1358.02  151.70
  -8   8   0 1322.28  121.43
   8  -8   0 1082.06  106.83
  -8  -8   0 1461.26  151.32
   8  -8   0 1008.56   78.70
  -8   8  -1 1116.90   94.51
   8   8   1 1294.87  156.21
  -8   8  -1 1166.05   92.98
   8  -8   1 1170.04  213.02
  -8  -8  -1 1125.87   92.38
   8  -8   1 1003.69  100.00
  -8   8  -2   35.89   25.33
   8   8   2  106.48   57.36
   8  -8   2  313.58  107.03
  -8  -8  -2   22.97   16.48
   8  -8   2   33.69   15.96
  -8   8  -3 8554.23  440.73
   8   8   3 8283.14  446.52
   8  -8   3 7855.76  436.82
  -8  -8  -3 8754.68  456.87
   8  -8   3 7874.31  401.93
  -8   8  -4 3430.14  160.77
   8   8   4 2531.89  149.48
   8  -8   4 2953.05  200.16
  -8  -8  -4 2974.33  153.04
   8  -8   4 2268.29  106.97
   8   8   5  144.53   80.76
   8  -8   5   99.36   73.31
  -8  -8  -5   -0.39   26.04
   8  -8   5    2.02    7.35
   8   8   6  375.83   90.17
   8  -8   6  453.07  106.13
  -8  -8  -6  284.08   67.14
   8   8   7 1520.14  127.56
   8  -8   7 2875.21  354.50
  -8  -8  -7 1750.78  132.97
   8   8   8  105.74   79.98
   8  -8   8   49.65   86.58
  -8  -8  -8   35.03   27.06
   8   8   9 1211.18  627.23
   8  -8   9 1320.65  497.31
  -8  -8  -9 2195.66  351.24
   8  10 -10  101.31   47.40
  -8  10  10  -22.00   44.94
   8  10  -9  276.62  118.75
  -8  10   9  317.35   89.66
  -8 -10   9  482.56  119.73
   8  10  -8  163.36   60.88
  -8  10   8  198.23   84.80
  -8 -10   8  309.17   92.96
   8  10  -7 1322.77  193.13
  -8  10   7 1073.47  292.51
  -8 -10   7 1293.67  145.17
  -8  10   6 3275.83  184.79
   8  10  -6 4052.45  244.28
  -8  10   6 3836.92  249.21
   8 -10  -6 2902.46  170.38
  -8 -10   6 4037.77  249.45
  -8  10   5 4088.42  211.61
   8  10  -5 4200.89  202.69
   8 -10  -5 4306.07  202.59
  -8 -10   5 3955.06  199.78
   8  10  -4 1016.89  159.36
  -8  10   4  933.02   86.60
  -8  10   4 1324.39  124.00
   8 -10  -4 1175.89  105.24
  -8 -10   4 1121.23  222.18
  -8  10   3 3765.48  197.84
   8  10  -3 3779.59  211.65
  -8  10   3 3480.11  202.41
   8 -10  -3 4158.83  233.07
  -8 -10   3 3711.14  212.34
  -8  10   2  449.79   76.01
   8  10  -2  485.34  109.58
   8 -10  -2  252.07   62.90
   8 -10  -2  171.58   55.52
  -8 -10   2  298.49   57.54
   8  10  -1 2137.05  190.36
  -8  10   1 2447.48  230.50
  -8  10   1 2036.65  156.94
   8 -10  -1 2053.02  255.83
   8 -10  -1 2267.42  166.01
  -8 -10   1 2411.45  234.00
   8  10   015274.47  608.17
  -8  10   016152.64  642.44
  -8  10   013250.07  527.50
   8 -10   015472.00  657.81
   8 -10   016149.18  636.86
  -8 -10   016396.18  652.65
  -8  10  -1 2618.35  189.39
   8  10   1 3022.97  226.83
   8 -10   1 2445.12  315.63
  -8 -10  -1 2851.67  251.48
  -8  10  -2   35.67   19.87
   8  10   2  101.34   46.35
   8 -10   2  345.63  120.65
  -8 -10  -2   75.22   37.91
   8 -10   2   26.25   15.85
  -8  10  -3 4655.98  174.73
   8  10   3 4527.50  196.27
   8 -10   3 4586.46  227.92
   8 -10   3 4093.41  144.93
  -8 -10  -3 3797.50  151.47
  -8  10  -4  752.57   95.48
   8  10   4  616.45  103.14
   8 -10   4 1162.96  182.22
  -8 -10  -4  664.68  110.68
   8 -10   4  503.63   71.18
   8  10   5 2564.87  597.11
   8 -10   5 2532.73  663.41
  -8 -10  -5 2292.65  252.51
   8  10   6 3948.01  295.96
   8 -10   6 3069.49  312.98
  -8 -10  -6 3485.60  255.77
   8  10   7 3554.80  263.23
   8 -10   7 3112.35  585.61
  -8 -10  -7 3380.92  207.68
   8  10   8  218.56   95.94
   8 -10   8   98.91   82.45
  -8 -10  -8   68.21   43.25
   8  10   9  701.09  490.69
   8 -10   9  980.03  532.73
  -8 -10  -9 1334.56  186.13
   8  12 -10  220.65   83.76
  -8  12  10  356.73  118.95
  -8 -12  10  356.62  101.48
   8  12  -9  231.09   80.55
  -8  12   9   91.85   59.57
  -8 -12   9   44.56   46.21
   8  12  -8  913.29  158.88
  -8  12   8  771.27  239.77
  -8 -12   8 1380.84  116.01
   8  12  -7 5417.79  333.04
  -8  12   7 5303.93  341.16
  -8 -12   7 5541.21  351.56
   8  12  -6  682.30  136.86
  -8  12   6  592.22  211.21
  -8 -12   6  573.51  157.45
  -8  12   5 8058.26  403.73
   8  12  -5 7943.80  364.05
   8 -12  -5 7613.13  345.08
  -8 -12   5 8072.48  377.38
   8  12  -4  501.35  118.55
  -8  12   4  584.46   74.05
  -8  12   4  673.71   82.32
   8 -12  -4  341.16   93.15
  -8 -12   4  556.80   78.77
  -8  12   3   65.89   19.34
   8  12  -3   88.41   43.76
  -8  12   3  157.06   62.52
   8 -12  -3   29.10   27.89
  -8 -12   3  123.79   56.32
   8  12  -2 2798.41  175.54
  -8  12   2 2204.98  200.65
  -8  12   2 2715.52  212.81
   8 -12  -2 2369.98  285.80
  -8 -12   2 2338.27  185.09
   8  12  -114965.30 3051.23
  -8  12   116582.30 3380.15
  -8  12   115731.72 3207.38
   8 -12  -113658.37  713.69
   8 -12  -114213.98  727.90
  -8 -12   114678.93 2993.25
   8  12   0 2290.80  184.01
  -8  12   0 2191.93  237.96
  -8  12   0 2275.59  179.05
   8 -12   0 2707.58  316.41
  -8 -12   0 2418.19  189.70
  -8  12  -1 9415.75  486.66
   8  12   1 8529.64  447.89
   8 -12   111163.30  828.83
  -8 -12  -110259.02  534.81
   8 -12   1 9012.56  462.83
  -8  12  -2 1928.14  149.07
   8  12   2 2080.95  179.88
   8 -12   2 2350.25  267.38
  -8 -12  -2 1859.63  150.00
   8 -12   2 1764.27  133.06
  -8  12  -3 1199.58  147.36
   8  12   3 1202.68  170.41
   8 -12   3 1681.60  496.92
   8 -12   3 1175.25  143.23
  -8 -12  -3 1432.99  246.83
   8  12   4  734.41  123.19
   8 -12   4  894.38  188.03
  -8 -12  -4  816.67  112.33
   8 -12   4  719.68  100.24
   8  12   5 6334.58  390.15
   8 -12   5 7531.32  731.32
  -8 -12  -5 6991.91  408.97
   8  12   6  844.17  121.91
   8 -12   6  747.26  132.95
  -8 -12  -6  662.00  105.25
   8  12   7  745.86  198.09
   8 -12   7 1024.81  309.52
  -8 -12  -7  934.34  204.74
   8  12   8  944.31  200.59
   8 -12   8  639.86  278.52
  -8 -12  -8  960.51  185.07
   8  12   9  716.65  196.00
  -8 -12  -9  256.38  118.31
   8  14 -10  114.33   42.77
  -8 -14  10  138.31   85.48
   8  14  -9   73.15   29.05
  -8  14   9  103.07   64.67
  -8 -14   9  106.75   68.41
   8  14  -8   -4.91   30.85
  -8  14   8   77.65   43.92
  -8 -14   8   83.01   47.31
   8  14  -7 2643.64  176.22
  -8  14   7 2751.23  315.59
  -8 -14   7 2577.48  177.95
   8  14  -6 4855.36  327.06
  -8  14   6 4702.96  332.20
  -8 -14   6 5020.84  343.92
   8  14  -4 2133.93  254.90
  -8  14   4 1951.29  109.23
  -8  14   4 2240.40  265.85
   8 -14  -4 1916.28  229.20
  -8 -14   4 1956.51  168.16
  -8  14   3  679.12   68.36
   8  14  -3  732.25  180.30
  -8  14   3  643.04  119.57
   8 -14  -3  742.95  103.11
  -8 -14   3  664.22   91.96
   8  14  -2  713.87  141.96
  -8  14   2  658.27   65.97
  -8  14   2  713.88  112.60
   8 -14  -2  757.22  129.34
  -8 -14   2  738.25   91.65
   8  14  -1 4143.21  228.93
  -8  14   1 3678.11  312.53
  -8  14   1 4362.83  309.13
   8 -14  -1 4625.26  485.13
   8 -14  -1 3677.24  201.80
  -8 -14   1 4111.15  235.02
   8  14   0 6831.36  362.14
  -8  14   0 6255.39  406.57
  -8  14   0 7352.24  386.99
   8 -14   0 9026.81  678.78
   8 -14   0 6886.70  359.30
  -8 -14   0 7398.55  393.67
  -8  14  -1 1886.48  201.74
   8  14   1 1715.23  144.04
   8 -14   1 2065.85  210.22
   8 -14   1 1594.42  143.52
  -8 -14  -1 2169.62  240.49
  -8  14  -2  507.12   95.09
   8  14   2  862.27  134.72
   8 -14   2  801.13  124.35
   8 -14   2  556.06   47.81
  -8 -14  -2  589.87  112.73
  -8  14  -3  171.85   73.45
   8  14   3  404.52   98.43
   8 -14   3  407.92  109.61
   8 -14   3  273.08   47.81
  -8 -14  -3  315.63   64.80
   8  14   4  915.36  151.04
   8 -14   4  646.71  190.03
  -8 -14  -4  764.49  124.29
   8  14   5 3546.47  265.09
   8 -14   5 3695.62  587.07
  -8 -14  -5 3986.59  283.25
   8  14   6  765.15  270.22
   8 -14   6 1005.42  169.61
  -8 -14  -6  827.39  145.86
   8  14   7 2472.94  208.37
   8 -14   7 1035.41  306.63
  -8 -14  -7 2181.02  145.74
   8  14   8  905.28  209.11
   8 -14   8  485.61  277.59
  -8 -14  -8  536.73  138.36
   8  14   9  123.40   70.59
  -8  14  -9  178.70   66.27
  -8 -14  -9  129.58   56.45
   8  16 -10  272.95   73.37
  -8 -16  10  224.34   75.49
   8  16  -9 1661.81  271.50
  -8 -16   9 1460.94  244.23
   8  16  -8  137.79   66.23
  -8  16   8  169.18  104.38
  -8 -16   8  472.39  114.85
   8  16  -7   63.71   26.66
  -8  16   7   39.92   33.12
  -8 -16   7   19.95   33.96
   8  16  -6 1392.18  147.42
  -8  16   6 1103.60  244.84
  -8 -16   6 1540.00  167.41
   8  16  -5  455.23  133.45
  -8  16   5  611.83  186.58
  -8 -16   5  698.31   97.87
   8  16  -4  278.93   89.16
  -8  16   4  245.65   41.01
  -8  16   4  204.15   70.73
  -8 -16   4  323.87   65.36
   8  16  -3 3917.59  192.69
  -8  16   3 3424.47  158.94
  -8  16   3 4029.89  275.05
   8 -16  -3 4101.09  354.47
  -8 -16   3 3682.39  192.08
  -8  16   2   52.67   22.11
   8  16  -2  123.67   48.09
   8 -16  -2    7.17   21.89
  -8 -16   2   40.97   30.65
   8  16  -1   34.71   30.14
  -8  16   1   -9.57   16.91
  -8  16   1    0.01   14.60
   8 -16  -1  -24.68   36.07
   8 -16  -1   29.83   13.46
  -8 -16   1  101.84   41.33
   8  16   0 1448.32  122.09
  -8  16   0 1180.51  103.81
  -8  16   0 1497.07  217.49
   8 -16   0 1881.05  230.75
   8 -16   0 1424.33  116.09
  -8 -16   0 1890.93  251.63
  -8  16  -1 1397.46  230.83
   8  16   1 1392.31  184.50
   8 -16   1 1303.90  204.72
   8 -16   1 1265.65  157.92
  -8 -16  -1 1534.84  197.35
  -8  16  -2  969.96  168.79
   8  16   2 1553.45  204.61
   8 -16   2 1594.46  262.61
   8 -16   2 1004.31  146.99
  -8 -16  -2 1393.24  182.59
   8  16   3 2464.88  300.64
   8 -16   3 2560.99  616.39
  -8 -16  -3 2077.50  242.35
   8 -16   3 1837.72  202.92
   8  16   4 1848.18  206.10
   8 -16   4 1696.45  296.44
  -8 -16  -4 1578.97  177.71
   8  16   5   47.92   41.65
   8 -16   5  235.68   94.33
  -8 -16  -5   88.03   38.77
   8  16   6 2545.79  223.28
   8 -16   6 1520.81  334.35
  -8 -16  -6 2000.16  136.38
  -8 -16  -7  712.46  195.97
   8  16   8   53.68   59.11
  -8  16  -8  173.07   84.05
  -8 -16  -8   37.40   29.06
   8  18  -9 2477.45  296.28
  -8 -18   9 2814.10  347.83
   8  18  -8 1279.93  399.76
  -8 -18   8 1519.80  258.53
   8  18  -7  257.99   77.97
  -8  18   7  316.67   90.45
  -8 -18   7  233.28   95.91
   8  18  -6 1096.65  126.02
  -8  18   6  795.10  237.38
  -8 -18   6 1143.37  134.85
   8  18  -5   52.80   34.27
  -8  18   5  -16.71   36.51
  -8 -18   5   59.12   34.27
  -8  18   4 3666.24  224.70
   8  18  -4 3753.82  234.38
  -8  18   4 4256.16  244.45
  -8  18   4 4022.22  346.07
  -8 -18   4 4059.66  256.83
  -8  18   3 4763.55  272.60
   8  18  -3 5186.92  320.55
  -8  18   3 5268.10  300.16
  -8  18   3 6019.71  360.76
  -8 -18   3 5544.66  329.02
   8  18  -2 4716.68  278.56
  -8  18   2 3806.89  268.66
  -8  18   2 4119.77  276.25
   8 -18  -2 3953.86  403.51
  -8 -18   2 4052.73  203.98
   8  18  -1   15.02   29.34
  -8  18   1   97.07   36.93
  -8  18   1   82.18   41.27
   8 -18  -1  102.73   47.52
  -8 -18   1  107.59   49.34
  -8  18   0 2357.44  193.26
   8  18   0 2762.21  255.38
   8 -18   0 2828.61  334.37
   8 -18   0 2471.67  125.49
  -8 -18   0 2612.17  242.57
   8  18   1 5357.27  320.18
   8 -18   1 6018.94  619.85
   8 -18   1 5212.19  300.29
  -8 -18  -1 5836.41  346.52
   8  18   2 5675.02  340.17
   8 -18   2 6104.99  577.86
  -8 -18  -2 5973.65  357.99
   8  18   3 5452.24  340.93
   8 -18   3 3660.15  505.50
   8 -18   3 4051.59  235.53
  -8 -18  -3 4537.25  305.73
   8  18   4  902.96  134.48
   8 -18   4  713.11  149.40
  -8 -18  -4  894.98  143.88
   8  18   5  160.52   48.58
   8 -18   5  198.03   68.70
  -8 -18  -5  353.76   84.90
   8  18   6 1136.91  188.65
  -8 -18  -6 1300.29  192.83
   8  18   7 2146.38  214.02
  -8  18  -7 2288.63  257.49
  -8 -18  -7 1891.89  240.12
   8  18   8 1436.32  350.36
  -8  18  -8 2383.62  289.80
  -8 -18  -8 1505.97  260.84
   8  20  -9   69.91   34.72
  -8 -20   9   14.85   45.57
   8  20  -8 1462.18  356.89
  -8 -20   8 2467.39  209.44
   8  20  -7  309.68   79.00
  -8 -20   7  216.39  118.72
   8  20  -6  177.29   68.36
  -8 -20   6  168.80   65.64
   8  20  -5  437.49  114.34
  -8 -20   5  542.69  135.40
   8  20  -410782.26  707.87
  -8  20   4 9165.59  591.50
  -8  20   411323.67 2286.21
  -8 -20   412033.87 2433.40
  -8  20   3   22.41   17.29
   8  20  -3   -6.45   35.47
  -8  20   3  -10.88   14.31
  -8  20   3   57.29   36.10
  -8 -20   3   75.69   38.17
  -8  20   2 2733.88  240.10
   8  20  -2 3340.25  276.36
  -8  20   2 3542.58  210.12
  -8  20   2 3360.01  219.56
  -8 -20   2 3552.88  231.32
  -8  20   1  977.36  120.83
   8  20  -1 1450.34  176.83
  -8  20   1 1003.14  124.44
  -8 -20   1 1374.06  168.40
   8  20   0   24.32   35.29
   8 -20   0   34.31   18.52
  -8 -20   0   36.82   33.75
   8  20   1  325.30   86.12
   8 -20   1  198.82  101.86
  -8 -20  -1  320.33   97.69
   8  20   2 9312.79  545.21
   8 -20   210413.65  650.04
   8 -20   2 9833.90  560.84
  -8 -20  -210487.75  612.34
   8  20   3  -61.99   40.59
  -8 -20  -3  -28.20   30.96
   8 -20   3    1.89    4.62
   8  20   4 5193.75  339.96
  -8 -20  -4 4718.35  298.49
   8  20   5  392.21   99.60
  -8  20  -5  314.34   79.13
  -8 -20  -5  402.59   86.73
   8  20   6  206.54   72.15
  -8  20  -6  403.65   98.44
  -8 -20  -6  276.17  127.17
   8  20   7  308.83  123.73
  -8  20  -7  136.83   72.53
  -8 -20  -7   48.53   39.95
   8  20   8 1164.75  504.35
  -8  20  -8 2972.49  516.90
  -8 -20  -8 1869.74  412.63
   8  22  -9 3306.03  577.99
  -8 -22   9 4541.95  740.08
   8  22  -8  327.62  113.46
  -8 -22   8  171.61   82.53
   8  22  -7  330.91  120.06
  -8 -22   7  234.77  100.53
   8  22  -6  192.28   67.62
  -8 -22   6  242.60   69.67
   8  22  -5   24.37   25.69
  -8 -22   5   37.90   53.68
   8  22  -4  448.34  100.95
  -8 -22   4  645.74   90.34
   8  22  -3 5706.99  397.24
  -8  22   3 6000.21  402.10
  -8 -22   3 5457.20  371.31
  -8  22   2  405.89   77.27
   8  22  -2  414.09   99.94
  -8  22   2  481.36   82.94
  -8 -22   2  570.11  115.53
   8  22  -1  166.79   61.66
  -8  22   1   80.12   38.90
  -8 -22   1   15.71   34.93
   8  22   0  411.49  128.18
  -8  22   0  639.78  156.45
  -8 -22   0  600.88  171.95
   8  22   1  130.58   47.22
  -8  22  -1   52.98   27.10
   8 -22   1   43.74   19.00
  -8 -22  -1  134.27   55.37
   8  22   2  436.85   92.79
  -8  22  -2  466.89  100.34
  -8 -22  -2  577.75  129.46
   8 -22   2  375.68  101.11
   8  22   3 5653.79  372.71
  -8  22  -3 4532.56  315.63
  -8 -22  -3 4921.44  309.57
   8  22   4   23.65   43.20
  -8  22  -4  132.30   73.32
  -8 -22  -4   13.10   36.57
   8  22   5  366.53  138.98
  -8  22  -5  677.34  147.03
  -8 -22  -5  742.25   79.04
   8  22   6  325.04  125.31
  -8  22  -6  495.31  178.91
  -8 -22  -6  574.06  147.34
   8  22   7  242.46  103.84
  -8  22  -7   83.64   56.67
  -8 -22  -7  154.94   92.55
   8  24  -8  250.04   94.62
  -8 -24   8  302.30  165.66
   8  24  -7  176.78   82.72
  -8 -24   7  -37.00   39.30
   8  24  -6 3931.51  305.60
  -8 -24   6 5244.85  403.93
   8  24  -5  515.39  155.68
  -8 -24   5  450.27  191.11
   8  24  -4 1467.23   85.69
  -8 -24   4 1613.32  113.55
   8  24  -3  194.81   69.11
  -8  24   3  193.72   51.00
  -8 -24   3  108.76   65.86
   8  24  -2 2127.19  259.96
  -8  24   2 2015.71  206.78
  -8 -24   2 1886.26  164.63
   8  24  -1  855.91  106.45
  -8  24   1  838.52  116.38
  -8 -24   1  716.63  113.49
   8  24   0 7947.79  486.54
  -8  24   0 7621.72  472.19
  -8 -24   0 7348.23  459.15
   8  24   1   50.96   31.33
  -8  24  -1  -10.40   29.49
  -8 -24  -1   47.49   15.75
   8 -24   1   31.82   16.48
   8  24   2  265.11   83.98
  -8  24  -2  133.44   56.54
  -8 -24  -2  332.92   86.21
   8 -24   2  169.21   52.92
   8  24   3   48.10   43.11
  -8  24  -3   55.42   40.66
  -8 -24  -3  162.33   58.85
   8  24   4 4326.79  279.72
  -8  24  -4 4798.97  279.25
  -8 -24  -4 4606.61  275.58
   8  24   5  175.63   73.28
  -8  24  -5  244.43   97.19
  -8 -24  -5  179.99   75.32
   8  24   6 3561.02  572.09
  -8  24  -6 3932.26  652.95
  -8 -24  -6 3998.92  635.69
   8  24   7  152.73   87.05
  -8  24  -7   53.25   50.07
  -8 -24  -7   70.79   41.96
   8  26  -7  231.98  107.09
  -8 -26   7  246.79  126.18
   8  26  -6 1300.03  228.38
  -8 -26   6 1504.06  257.01
   8  26  -5  271.65   87.78
  -8 -26   5  298.78   97.91
   8  26  -4   51.11   48.95
  -8 -26   4  205.29   60.53
   8  26  -3  252.28   90.98
  -8 -26   3  284.90   72.54
   8  26  -2 1758.87  167.09
  -8  26   2 1506.12  133.58
  -8 -26   2 1403.66  114.97
   8  26  -1 1934.40  155.09
  -8  26   1 1987.56  228.14
  -8 -26   1 2181.09  158.50
   8  26   0 5199.19  321.78
  -8  26   0 5002.93  295.60
  -8 -26   0 4369.14  298.08
   8 -26   0 5034.25  293.02
   8  26   1  169.38   71.53
  -8  26  -1   50.71   24.96
  -8 -26  -1  132.37   64.75
   8 -26   1   18.06   25.35
   8  26   2  555.29  108.72
  -8  26  -2  592.88  125.21
  -8 -26  -2  634.01  126.89
   8  26   3  210.39   85.15
  -8  26  -3  107.10   60.70
  -8 -26  -3   18.93   34.77
   8  26   4 1823.38  182.78
  -8  26  -4 1726.13  292.46
  -8 -26  -4 2013.79  217.44
   8  26   5 1886.93  319.60
  -8  26  -5 2442.60  395.16
  -8 -26  -5 2280.47  369.49
   8  26   6 1982.08  282.66
  -8  26  -6 1862.37  336.65
  -8 -26  -6 2377.63  291.34
  -8 -28   7 3209.98  532.91
   8  28  -6  162.29   62.35
  -8 -28   6  170.62   75.51
   8  28  -5 1251.31  433.91
  -8 -28   5 1842.07  307.42
   8  28  -4  192.22   59.33
  -8 -28   4  284.07  115.51
   8  28  -3  317.66  105.31
  -8 -28   3  276.29   79.34
   8  28  -2  332.55   79.99
  -8  28   2  366.38   69.39
  -8 -28   2  566.36  117.88
   8  28  -1 6011.97  348.91
  -8  28   1 6169.63  342.61
  -8 -28   1 5929.25  373.88
   8 -28  -1 6113.57  340.34
   8  28   0   59.81   27.93
  -8  28   0   -4.45   26.95
  -8 -28   0  206.79   83.82
   8 -28   0   26.48   20.12
   8  28   1 4343.95  342.54
  -8  28  -1 4296.12  363.03
  -8 -28  -1 4143.18  424.21
   8 -28   1 4010.37  302.14
   8  28   2  868.31  157.38
  -8  28  -2  874.58  154.53
  -8 -28  -2  829.44  183.10
   8  28   3  181.06   73.37
  -8  28  -3   33.93   41.19
  -8 -28  -3  142.66   66.70
  -8  28  -4   82.45   61.13
  -8 -28  -4   56.73   50.33
   8  28   5 2484.40  391.61
  -8  28  -5 4341.76  508.97
  -8 -28  -5 4117.87  501.13
   8  30  -6   99.07   65.09
  -8 -30   6    6.30   44.25
   8 -30  -6   89.70   55.24
   8  30  -5  432.81  163.65
  -8 -30   5  669.21  179.87
   8 -30  -5 1011.38  240.91
   8  30  -4 2440.82  472.98
  -8 -30   4 2791.41  459.33
   8 -30  -4 3430.87  548.63
   8  30  -3  378.38  173.03
  -8 -30   3  804.60  163.89
   8 -30  -3  560.81  157.55
   8  30  -2  493.08  189.59
  -8 -30   2  900.90  185.74
   8 -30  -2  590.31  166.02
   8  30  -1  120.71   57.63
  -8 -30   1   31.01   22.04
   8 -30  -1   27.56   22.36
   8  30   0  508.75  181.72
  -8  30   0  347.90  117.40
  -8 -30   0  335.21  132.67
   8 -30   0  403.87  148.01
   8  30   1  114.49   53.61
  -8  30  -1   80.58   38.14
  -8 -30  -1   25.68   27.22
   8  30   2 2013.21  354.39
  -8  30  -2 3247.67  321.03
  -8 -30  -2 3596.60  290.10
   8  30   3  303.41   95.26
  -8  30  -3  290.38  101.98
  -8 -30  -3  213.10   84.41
   8  30   4   92.16   61.80
  -8  30  -4  187.31   86.07
  -8 -30  -4  342.56  103.33
   8  32  -4  -31.26   49.64
  -8 -32   4   74.64   58.33
   8 -32  -4  -13.02   34.25
   8  32  -3 4990.28  580.29
  -8 -32   3 5349.47  623.44
   8 -32  -3 5388.42  621.87
   8  32  -2   27.63   22.26
  -8 -32   2  120.61   64.33
   8 -32  -2   50.26   33.57
  -8 -32   1  388.88  124.77
   8 -32  -1   66.99   33.91
   8  32   0  151.72   68.58
  -8  32   0  164.68   47.74
  -8 -32   0  153.71   69.14
   8 -32   0   69.89   22.41
   8  32   1  291.58   89.40
  -8  32  -1  212.10   82.28
  -8 -32  -1  230.25   88.27
   8  32   2  148.77   71.08
  -8  32  -2  510.76  125.70
  -8 -32  -2  235.89  110.34
   8  32   3  870.74  436.95
  -8  32  -3 2777.23  513.07
  -8 -32  -3 3357.79  549.87
   8  34  -3  782.64  373.32
  -8 -34   3 1974.08  332.86
   8 -34  -3 2052.85  342.04
   8  34  -2  122.79   54.67
  -8 -34   2  172.67   72.74
   8 -34  -2   60.40   38.14
   8  34  -1 1707.44  319.78
  -8 -34   1 2067.95  347.31
   8  34   0  605.89  230.56
  -8  34   0  529.83  168.69
  -8 -34   0  962.76  258.34
   8  34   1 2307.09  390.51
  -8  34  -1 1930.17  350.99
  -8 -34  -1 2159.12  477.12
  -9   1  10  770.81  212.33
  -9  -1  10  523.86  151.41
   9   1  -9   82.75   31.35
  -9   1   9  170.68   81.50
  -9  -1   9  222.83   89.14
   9  -1  -9   70.20   23.12
  -9   1   8  261.47   82.11
  -9  -1   8   23.70   39.26
   9  -1  -8   52.88   29.80
   9   1  -7  739.90  170.00
  -9   1   7  982.02  122.27
  -9  -1   7  806.08  181.23
   9  -1  -7  852.98  117.92
   9   1  -6 4999.37  291.98
  -9   1   6 3314.66  207.20
  -9   1   6 4318.70  268.13
   9  -1  -6 4731.80  276.35
  -9  -1   6 3680.88  216.19
  -9  -1   6 4292.61  280.58
  -9   1   5 1153.29  191.38
   9   1  -5 1297.30  188.25
  -9  -1   5  829.44  173.86
  -9  -1   5 1501.78  193.16
   9  -1  -5 1261.18  157.11
   9   1  -4  121.60   33.97
  -9   1   4  242.72   63.93
  -9   1   4  324.89   84.90
   9  -1  -4  207.10   65.35
  -9  -1   4  182.96   42.06
  -9  -1   4  209.11   69.27
  -9   1   3  384.43  101.69
   9   1  -3  205.11   52.25
  -9   1   3  193.36   53.53
  -9  -1   3  240.66   64.78
   9  -1  -3  321.25   84.98
  -9  -1   3  392.66   99.22
   9   1  -2  828.96  131.15
  -9   1   2  641.10  105.64
  -9   1   2  492.08  107.83
  -9  -1   2  597.49   60.25
  -9  -1   2  633.82   82.76
   9  -1  -2  652.14  116.51
   9   1  -1 2436.69  277.69
  -9   1   1 1843.32  149.96
  -9   1   1 2026.29  155.32
   9  -1  -1 1771.36  141.13
  -9  -1   1 2251.28  214.97
   9   1   0 4793.25  215.38
   9   1   0 4432.30  185.32
  -9   1   0 5257.64  225.33
  -9  -1   0 5480.37  259.76
   9  -1   0 4876.36  203.65
   9  -1   0 4913.85  221.55
   9   1   1 2179.96  179.39
  -9   1  -1 2659.88  205.59
   9   1   1 2308.80  175.44
   9  -1   1 2140.41  174.78
  -9  -1  -1 2446.46  191.57
   9  -1   1 2411.08  182.12
   9   1   2   86.61   51.19
  -9   1  -2   20.41   24.40
   9   1   2   24.51   14.13
   9  -1   2   14.18   44.84
  -9  -1  -2   18.15   15.10
   9  -1   2   17.99   12.50
   9   1   3  156.16   57.95
   9   1   3  426.94  119.79
  -9   1  -3  420.71  100.09
  -9  -1  -3  391.52  101.03
   9  -1   3  514.27   91.26
   9  -1   3  216.81   72.15
   9   1   4  709.07  122.71
  -9   1  -4  518.19  107.70
   9   1   4  238.38   78.88
   9  -1   4  355.85   76.87
  -9  -1  -4  468.09   67.33
   9  -1   4  175.30   72.23
   9   1   5  848.68  142.93
   9   1   5  203.86   73.48
  -9   1  -5  661.05  188.05
  -9  -1  -5  728.44  123.15
   9  -1   5  165.17   62.43
   9  -1   5  705.42  123.32
   9   1   6 2189.24  187.10
  -9   1  -6 2312.24  147.16
  -9  -1  -6 2526.95  163.89
   9  -1   6 1582.06  378.57
   9   1   7  251.05  113.32
  -9   1  -7  147.15   54.77
   9  -1   7  523.51  165.99
  -9  -1  -7  244.35   58.81
   9   1   8  107.09   76.40
   9  -1   8  146.18  116.54
   9   1   9  113.04   84.46
   9  -1   9   98.66   57.87
[truncated: 119,313 more chars]
