# Supplementary material
Source: MDPI journal article supplement (https://www.mdpi.com/2304-6740/5/3/53)
Supplement: s1 [file s1 › New folder/1-Cl123K.cif]

data_global
_audit_creation_date                               2017-03-26
_audit_creation_method                            'by CrystalStructure 4.2.2'
_audit_update_record                               ?

#==============================================================================
# PROCESSING SUMMARY (IUCr Office Use Only)

_journal_date_recd_electronic                      ?
_journal_date_from_coeditor                        ?
_journal_date_accepted                             ?
_journal_coeditor_code                             ?

#==============================================================================
# SUBMISSION DETAILS

_publ_contact_author_name                         'ENTER NAME'
_publ_contact_author_email                        'ENTER EMAIL ADDRESS'
_publ_contact_author_fax                          'ENTER FAX NUMBER'
_publ_contact_author_phone                        'ENTER PHONE NUMBER'
_publ_contact_letter
;
    ENTER TEXT OF LETTER
;
_publ_requested_journal                           'ENTER JOURNAL NAME HERE'
_publ_requested_category
                                               'CHOOSE FI FM FO CI CM CO or AD'
_publ_requested_coeditor_name                      ?

#==============================================================================
# TITLE AND AUTHOR LIST

_publ_section_title
;
    ENTER SECTION TITLE
;
_publ_section_title_footnote
;
    ENTER FOOTNOTE TO TITLE OF PAPER
;
loop_
_publ_author_name
_publ_author_footnote
_publ_author_address
' FIRST AUTHORS NAME '
;
  FIRST AUTHORS FOOTNOTES
;
;
  FIRST AUTHORS ADDRESS
;
_publ_section_synopsis
;
    ENTER SYNOPSIS
;

#==============================================================================
# TEXT

_publ_section_abstract
;
    ENTER ABSTRACT
;
_publ_section_comment
;
    ENTER TEXT
;
_publ_section_references
;
    ENTER OTHER REFERENCES

    Rigaku (2016). CrystalStructure. Version 4.2.2. 
    Rigaku Corporation, Tokyo, Japan.

    Altomare, A., Burla, M. C., Camalli, M., Cascarano, G. L., 
    Giacovazzo, C., Guagliardi, A., Moliterni, A. G. G., 
    Polidori, G. and Spagna, R. 
    (1999). J. Appl. Cryst. 32, 115-119.
    SIR97

    Sheldrick, G.M. (2008) SHELXL Version 2014/7, Acta Cryst. A64, 112-122.

    Rigaku (1998). REQAB. 
    Rigaku Corporation, Tokyo, Japan.

;
_publ_section_figure_captions
;
    ENTER FIGURE CAPTIONS
;
_publ_section_exptl_prep
;
    ENTER COMPOUND PREPARATION DETAILS
;
_publ_section_exptl_refinement
;
    ENTER SPECIAL DETAILS OF THE REFINEMENT
;

#==============================================================================
data_1-Cl123K

#==============================================================================
# CHEMICAL DATA

_chemical_formula_sum                             'C34 H21 Cl6 Fe N8 O10'
_chemical_formula_moiety                          'C34 H21 Cl6 Fe N8 O10'
_chemical_formula_weight                           970.15
_chemical_melting_point                            ?

#==============================================================================
# CRYSTAL DATA
_space_group_crystal_system                        monoclinic
_space_group_name_H-M_alt                         'C 1 2/c 1'
_space_group_name_Hall                            '-C 2yc'
_space_group_IT_number                             15
loop_
 _space_group_symop_operation_xyz
 'x, y, z'
 '-x, y, -z+1/2'
 'x+1/2, y+1/2, z'
 '-x+1/2, y+1/2, -z+1/2'
 '-x, -y, -z'
 'x, -y, z-1/2'
 '-x+1/2, -y+1/2, -z'
 'x+1/2, -y+1/2, z-1/2'
#------------------------------------------------------------------------------
_cell_length_a                                     12.479(5)
_cell_length_b                                     30.593(11)
_cell_length_c                                     9.469(3)
_cell_angle_alpha                                  90.0000
_cell_angle_beta                                   96.795(8)
_cell_angle_gamma                                  90.0000
_cell_volume                                       3590(2)
_cell_formula_units_Z                              4
_cell_measurement_reflns_used                      6818
_cell_measurement_theta_min                        1.77
_cell_measurement_theta_max                        30.60
_cell_measurement_temperature                      123
#------------------------------------------------------------------------------
_exptl_crystal_description                         prism
_exptl_crystal_colour                              colorless
_exptl_crystal_size_max                            0.200
_exptl_crystal_size_mid                            0.200
_exptl_crystal_size_min                            0.200
_exptl_crystal_density_diffrn                      1.795
_exptl_crystal_density_meas                        ?
_exptl_crystal_density_method                     'not measured'
_exptl_crystal_F_000                               1956.00
_exptl_absorpt_coefficient_mu                      0.940
_exptl_absorpt_correction_type                     multi-scan
_exptl_absorpt_process_details                    'REQAB (Rigaku, 1998)'
_exptl_absorpt_correction_T_min                    0.679
_exptl_absorpt_correction_T_max                    0.829

#==============================================================================
# EXPERIMENTAL DATA

_diffrn_ambient_temperature                        123
_diffrn_radiation_type                            'Mo K\a'
_diffrn_radiation_wavelength                       0.71075
_diffrn_measurement_device_type                   'Rigaku Saturn724'
_diffrn_measurement_method                         \w
_diffrn_detector_area_resol_mean                   14.222
_diffrn_reflns_number                              15405
_diffrn_reflns_av_R_equivalents                    0.0699
_diffrn_reflns_theta_max                           27.483
_diffrn_reflns_theta_min                           3.247
_diffrn_reflns_theta_full                          25.242
_diffrn_measured_fraction_theta_max                0.987
_diffrn_measured_fraction_theta_full               0.994
_diffrn_reflns_Laue_measured_fraction_max          0.987
_diffrn_reflns_Laue_measured_fraction_full         0.994
_diffrn_reflns_point_group_measured_fraction_max   0.987
_diffrn_reflns_point_group_measured_fraction_full  0.994
_diffrn_reflns_limit_h_min                        -16
_diffrn_reflns_limit_h_max                         16
_diffrn_reflns_limit_k_min                        -39
_diffrn_reflns_limit_k_max                         39
_diffrn_reflns_limit_l_min                        -12
_diffrn_reflns_limit_l_max                         12
_diffrn_standards_number                           0
_diffrn_standards_interval_count                   .
_diffrn_standards_decay_%                          ?
_reflns_number_total                               4069
_reflns_number_gt                                  3586
_reflns_threshold_expression                       F^2^>2.0\s(F^2^)
_reflns_Friedel_coverage          0.000
_reflns_Friedel_fraction_max      .
_reflns_Friedel_fraction_full     .

#==============================================================================
# REFINEMENT DATA

_refine_special_details
;
    Refinement was performed using all reflections. The weighted 
    R-factor (wR) and goodness of fit (S) are based on F^2^.
    R-factor (gt) are based on F. The threshold expression of
    F^2^ > 2.0 sigma(F^2^) is used only for calculating R-factor (gt).
;
_refine_ls_structure_factor_coef                   Fsqd
_refine_ls_R_factor_all                            0.0692
_refine_ls_R_factor_gt                             0.0581
_refine_ls_wR_factor_ref                           0.1048
_refine_ls_wR_factor_gt                            0.0993
_refine_ls_number_restraints                       0
_refine_ls_hydrogen_treatment                      mixed
_refine_ls_number_reflns                           4069
_refine_ls_number_parameters                       274
_refine_ls_goodness_of_fit_ref                     1.115
_refine_ls_weighting_scheme                        calc
_refine_ls_weighting_details
          'w = 1/[\s^2^(Fo^2^)+(0.0070P)^2^+17.9884P] where P=(Fo^2^+2Fc^2^)/3'
_atom_sites_solution_hydrogens                     geom
_atom_sites_solution_primary                       direct
_atom_sites_solution_secondary                     difmap
_refine_ls_shift/su_max                            0.000
_refine_diff_density_max                           0.47
_refine_diff_density_min                          -0.53
_refine_ls_extinction_method                       none
_refine_ls_extinction_coef                         ?

loop_
_atom_type_symbol
_atom_type_description
_atom_type_scat_dispersion_real
_atom_type_scat_dispersion_imag
_atom_type_scat_source
  'C' 'C'  0.0033 0.0016 
;
International Tables for Crystallography
(Vol. C, Tables 4.2.6.8 and 6.1.1.4)
;
  'H' 'H'  0.0000 0.0000 
;
International Tables for Crystallography
(Vol. C, Table 6.1.1.4)
;
  'N' 'N'  0.0061 0.0033 
;
International Tables for Crystallography
(Vol. C, Tables 4.2.6.8 and 6.1.1.4)
;
  'O' 'O'  0.0106 0.0060 
;
International Tables for Crystallography
(Vol. C, Tables 4.2.6.8 and 6.1.1.4)
;
  'Cl' 'Cl'  0.1484 0.1585 
;
International Tables for Crystallography
(Vol. C, Tables 4.2.6.8 and 6.1.1.4)
;
  'Fe' 'Fe'  0.3463 0.8444 
;
International Tables for Crystallography
(Vol. C, Tables 4.2.6.8 and 6.1.1.4)
;

#==============================================================================
# ATOMIC COORDINATES AND THERMAL PARAMETERS

loop_
 _atom_site_label
 _atom_site_type_symbol
 _atom_site_fract_x
 _atom_site_fract_y
 _atom_site_fract_z
 _atom_site_U_iso_or_equiv
 _atom_site_adp_type
 _atom_site_occupancy
 _atom_site_site_symmetry_order  
 _atom_site_calc_flag
 _atom_site_refinement_flags_posn
 _atom_site_refinement_flags_adp
 _atom_site_refinement_flags_occupancy
 _atom_site_disorder_assembly
 _atom_site_disorder_group
Fe1 Fe 0.5000 0.15513(2) 0.2500 0.01540(16) Uani 1 2 d S T P . .
Cl1 Cl 0.86252(7) 0.33414(3) 0.24483(10) 0.0264(2) Uani 1 1 d . . . . .
Cl2 Cl 0.82030(6) 0.02209(3) 0.25291(8) 0.02119(19) Uani 1 1 d . . . . .
Cl3 Cl 0.95129(6) 0.09733(3) 0.42060(9) 0.02119(19) Uani 1 1 d . . . . .
O1 O 0.56206(18) 0.19676(7) 0.3771(2) 0.0183(5) Uani 1 1 d . . . . .
O2 O 0.4598(2) 0.26117(9) 0.4827(3) 0.0385(7) Uani 1 1 d . . . . .
O3 O 0.57202(19) 0.30833(8) 0.5862(2) 0.0240(5) Uani 1 1 d . . . . .
O4 O 0.77821(18) -0.07389(8) 0.4022(3) 0.0234(5) Uani 1 1 d . . . . .
O5 O 0.90357(18) -0.09351(8) 0.2654(2) 0.0233(5) Uani 1 1 d . . . . .
N1 N 0.4540(2) 0.10854(9) 0.1116(3) 0.0169(6) Uani 1 1 d . . . . .
N2 N 0.6337(2) 0.11275(9) 0.0840(3) 0.0185(6) Uani 1 1 d . . . . .
N3 N 0.6287(2) 0.15218(8) 0.1567(3) 0.0162(6) Uani 1 1 d . . . . .
N4 N 0.5474(2) 0.27991(9) 0.4955(3) 0.0201(6) Uani 1 1 d . . . . .
C1 C 0.5355(3) 0.09345(10) 0.0445(3) 0.0168(6) Uani 1 1 d . . . . .
C2 C 0.5214(3) 0.06026(11) -0.0565(4) 0.0247(8) Uani 1 1 d . . . . .
H1 H 0.5806 0.0492 -0.1001 0.030 Uiso 1 1 calc R U . . .
C3 C 0.4187(3) 0.04393(12) -0.0912(4) 0.0261(8) Uani 1 1 d . . . . .
H2 H 0.4064 0.0213 -0.1597 0.031 Uiso 1 1 calc R U . . .
C4 C 0.3331(3) 0.06051(12) -0.0262(4) 0.0258(8) Uani 1 1 d . . . . .
H3 H 0.2618 0.0499 -0.0511 0.031 Uiso 1 1 calc R U . . .
C5 C 0.3537(3) 0.09245(11) 0.0743(4) 0.0213(7) Uani 1 1 d . . . . .
H4 H 0.2956 0.1037 0.1195 0.026 Uiso 1 1 calc R U . . .
C6 C 0.7129(3) 0.17760(10) 0.1694(3) 0.0166(7) Uani 1 1 d . . . . .
C7 C 0.8137(3) 0.16422(11) 0.1103(4) 0.0203(7) Uani 1 1 d . . . . .
H29A H 0.8735 0.1829 0.1501 0.024 Uiso 1 1 calc R U . . .
H29B H 0.8034 0.1673 0.0066 0.024 Uiso 1 1 calc R U . . .
H29C H 0.8303 0.1337 0.1355 0.024 Uiso 1 1 calc R U . . .
C8 C 0.7047(3) 0.21963(10) 0.2421(3) 0.0168(7) Uani 1 1 d . . . . .
C9 C 0.7764(3) 0.25316(11) 0.2150(3) 0.0190(7) Uani 1 1 d . . . . .
H6 H 0.8286 0.2480 0.1516 0.023 Uiso 1 1 calc R U . . .
C10 C 0.7721(3) 0.29357(11) 0.2796(4) 0.0191(7) Uani 1 1 d . . . . .
C11 C 0.6964(3) 0.30232(11) 0.3703(4) 0.0197(7) Uani 1 1 d . . . . .
H7 H 0.6925 0.3303 0.4128 0.024 Uiso 1 1 calc R U . . .
C12 C 0.6258(2) 0.26921(11) 0.3982(3) 0.0177(7) Uani 1 1 d . . . . .
C13 C 0.6264(2) 0.22710(10) 0.3371(3) 0.0165(7) Uani 1 1 d . . . . .
C14 C 0.8671(3) -0.07008(10) 0.3606(3) 0.0176(7) Uani 1 1 d . . . . .
C15 C 0.9394(3) -0.03376(11) 0.4278(3) 0.0170(7) Uani 1 1 d . . . . .
C16 C 0.9188(3) 0.00976(11) 0.3917(3) 0.0180(7) Uani 1 1 d . . . . .
C17 C 0.9777(3) 0.04314(10) 0.4640(3) 0.0168(6) Uani 1 1 d . . . . .
H5 H 0.678(3) 0.1099(11) 0.032(4) 0.015(10) Uiso 1 1 d . . . . .
H13 H 1.0000 -0.091(3) 0.2500 0.13(4) Uiso 1 2 d S . P . .

loop_
 _atom_site_aniso_label
 _atom_site_aniso_U_11
 _atom_site_aniso_U_22
 _atom_site_aniso_U_33
 _atom_site_aniso_U_23
 _atom_site_aniso_U_13
 _atom_site_aniso_U_12
Fe1 0.0123(3) 0.0173(3) 0.0169(3) 0.000 0.0027(2) 0.000
Cl1 0.0225(4) 0.0246(4) 0.0324(5) 0.0023(4) 0.0038(4) -0.0077(3)
Cl2 0.0177(4) 0.0244(4) 0.0201(4) 0.0009(3) -0.0030(3) 0.0007(3)
Cl3 0.0211(4) 0.0178(4) 0.0241(4) 0.0022(3) -0.0001(3) -0.0001(3)
O1 0.0167(12) 0.0208(12) 0.0184(11) -0.0007(10) 0.0057(9) -0.0022(9)
O2 0.0246(14) 0.0400(16) 0.0544(18) -0.0264(14) 0.0182(13) -0.0116(12)
O3 0.0236(13) 0.0246(13) 0.0233(13) -0.0078(11) -0.0001(10) 0.0020(10)
O4 0.0173(12) 0.0266(13) 0.0270(13) 0.0012(11) 0.0053(10) -0.0040(10)
O5 0.0181(12) 0.0272(13) 0.0249(13) -0.0069(11) 0.0037(10) -0.0032(10)
N1 0.0142(13) 0.0201(14) 0.0165(13) 0.0019(11) 0.0018(10) -0.0006(11)
N2 0.0132(14) 0.0214(14) 0.0222(15) -0.0024(12) 0.0073(12) -0.0007(11)
N3 0.0164(14) 0.0165(13) 0.0161(13) -0.0028(11) 0.0033(11) -0.0009(11)
N4 0.0189(14) 0.0186(14) 0.0230(15) -0.0050(12) 0.0031(12) -0.0002(11)
C1 0.0169(16) 0.0167(15) 0.0172(16) -0.0001(13) 0.0033(12) -0.0020(12)
C2 0.0262(19) 0.0259(18) 0.0230(18) -0.0035(15) 0.0070(14) 0.0008(15)
C3 0.031(2) 0.0265(19) 0.0203(18) -0.0068(15) 0.0023(15) -0.0067(15)
C4 0.0202(18) 0.033(2) 0.0237(18) -0.0032(16) 0.0012(14) -0.0087(15)
C5 0.0153(16) 0.0264(18) 0.0220(17) -0.0024(15) 0.0019(13) -0.0029(14)
C6 0.0153(16) 0.0198(16) 0.0153(15) 0.0031(13) 0.0041(12) 0.0001(13)
C7 0.0136(16) 0.0238(17) 0.0239(17) -0.0025(14) 0.0034(13) -0.0013(13)
C8 0.0145(15) 0.0175(16) 0.0181(16) -0.0024(13) 0.0005(12) 0.0012(12)
C9 0.0117(15) 0.0257(17) 0.0198(16) 0.0001(14) 0.0031(12) 0.0000(13)
C10 0.0141(16) 0.0187(16) 0.0237(17) 0.0025(14) -0.0015(13) -0.0046(13)
C11 0.0179(16) 0.0173(16) 0.0231(17) -0.0024(14) -0.0010(13) 0.0009(13)
C12 0.0121(15) 0.0237(17) 0.0173(16) -0.0028(14) 0.0018(12) -0.0005(13)
C13 0.0139(15) 0.0184(16) 0.0168(16) 0.0006(13) -0.0003(12) 0.0017(12)
C14 0.0174(16) 0.0183(16) 0.0169(16) 0.0029(13) 0.0007(13) -0.0012(13)
C15 0.0145(15) 0.0199(16) 0.0168(15) -0.0021(13) 0.0031(12) -0.0043(13)
C16 0.0132(15) 0.0241(17) 0.0164(15) 0.0018(14) 0.0004(12) -0.0001(13)
C17 0.0155(15) 0.0172(15) 0.0190(16) 0.0009(13) 0.0069(12) 0.0016(12)

#==============================================================================
_computing_data_collection
                                             'CrystalClear (Rigaku Inc., 2008)'
_computing_cell_refinement                         CrystalClear
_computing_data_reduction                          CrystalClear
_computing_structure_solution                      SIR97
_computing_structure_refinement
                                      'SHELXL Version 2014/7 (Sheldrick, 2008)'
_computing_publication_material
                                        'CrystalStructure 4.2.2 (Rigaku, 2016)'
_computing_molecular_graphics                     'CrystalStructure 4.2.2'

#==============================================================================
# MOLECULAR GEOMETRY

_geom_special_details
;
 All esds (except the esd in the dihedral angle between two l.s. planes)
 are estimated using the full covariance matrix.  The cell esds are taken
 into account individually in the estimation of esds in distances, angles
 and torsion angles; correlations between esds in cell parameters are only
 used when they are defined by crystal symmetry.  An approximate (isotropic)
 treatment of cell esds is used for estimating esds involving l.s. planes.
;

loop_
 _geom_bond_atom_site_label_1
 _geom_bond_atom_site_label_2
 _geom_bond_distance
 _geom_bond_site_symmetry_2
 _geom_bond_publ_flag
Fe1 O1 1.858(2) . ?
Fe1 O1 1.858(2) 2_655 ?
Fe1 N3 1.924(3) 2_655 ?
Fe1 N3 1.924(3) . ?
Fe1 N1 1.975(3) 2_655 ?
Fe1 N1 1.975(3) . ?
Cl1 C10 1.735(3) . ?
Cl2 C16 1.732(3) . ?
Cl3 C17 1.730(3) . ?
O1 C13 1.312(4) . ?
O2 N4 1.227(4) . ?
O3 N4 1.235(3) . ?
O4 C14 1.226(4) . ?
O5 C14 1.277(4) . ?
O5 H13 1.232(7) . ?
N1 C1 1.343(4) . ?
N1 C5 1.352(4) . ?
N2 C1 1.373(4) . ?
N2 N3 1.394(4) . ?
N2 H5 0.79(4) . ?
N3 C6 1.302(4) . ?
N4 C12 1.458(4) . ?
C1 C2 1.391(5) . ?
C2 C3 1.379(5) . ?
C2 H1 0.9500 . ?
C3 C4 1.390(5) . ?
C3 H2 0.9500 . ?
C4 C5 1.367(5) . ?
C4 H3 0.9500 . ?
C5 H4 0.9500 . ?
C6 C8 1.468(4) . ?
C6 C7 1.493(4) . ?
C7 H29A 0.9800 . ?
C7 H29B 0.9800 . ?
C7 H29C 0.9800 . ?
C8 C9 1.405(4) . ?
C8 C13 1.422(4) . ?
C9 C10 1.383(5) . ?
C9 H6 0.9500 . ?
C10 C11 1.376(5) . ?
C11 C12 1.388(4) . ?
C11 H7 0.9500 . ?
C12 C13 1.413(4) . ?
C14 C15 1.522(4) . ?
C15 C16 1.391(4) . ?
C15 C17 1.397(4) 5_756 ?
C16 C17 1.390(4) . ?
C17 C15 1.397(4) 5_756 ?

loop_
 _geom_angle_atom_site_label_1
 _geom_angle_atom_site_label_2
 _geom_angle_atom_site_label_3
 _geom_angle
 _geom_angle_site_symmetry_1
 _geom_angle_site_symmetry_3
 _geom_angle_publ_flag
O1 Fe1 O1 93.42(14) . 2_655 ?
O1 Fe1 N3 92.36(11) . 2_655 ?
O1 Fe1 N3 91.32(10) 2_655 2_655 ?
O1 Fe1 N3 91.32(10) . . ?
O1 Fe1 N3 92.36(11) 2_655 . ?
N3 Fe1 N3 174.63(16) 2_655 . ?
O1 Fe1 N1 89.93(10) . 2_655 ?
O1 Fe1 N1 172.31(10) 2_655 2_655 ?
N3 Fe1 N1 81.62(11) 2_655 2_655 ?
N3 Fe1 N1 94.48(11) . 2_655 ?
O1 Fe1 N1 172.31(10) . . ?
O1 Fe1 N1 89.93(11) 2_655 . ?
N3 Fe1 N1 94.48(11) 2_655 . ?
N3 Fe1 N1 81.62(11) . . ?
N1 Fe1 N1 87.60(15) 2_655 . ?
C13 O1 Fe1 121.3(2) . . ?
C14 O5 H13 119(3) . . ?
C1 N1 C5 118.7(3) . . ?
C1 N1 Fe1 112.7(2) . . ?
C5 N1 Fe1 128.6(2) . . ?
C1 N2 N3 114.6(3) . . ?
C1 N2 H5 117(3) . . ?
N3 N2 H5 119(3) . . ?
C6 N3 N2 118.6(3) . . ?
C6 N3 Fe1 129.7(2) . . ?
N2 N3 Fe1 110.9(2) . . ?
O2 N4 O3 122.9(3) . . ?
O2 N4 C12 119.3(3) . . ?
O3 N4 C12 117.8(3) . . ?
N1 C1 N2 115.1(3) . . ?
N1 C1 C2 122.4(3) . . ?
N2 C1 C2 122.5(3) . . ?
C3 C2 C1 117.8(3) . . ?
C3 C2 H1 121.1 . . ?
C1 C2 H1 121.1 . . ?
C2 C3 C4 120.3(3) . . ?
C2 C3 H2 119.9 . . ?
C4 C3 H2 119.9 . . ?
C5 C4 C3 118.5(3) . . ?
C5 C4 H3 120.7 . . ?
C3 C4 H3 120.7 . . ?
N1 C5 C4 122.3(3) . . ?
N1 C5 H4 118.8 . . ?
C4 C5 H4 118.8 . . ?
N3 C6 C8 117.8(3) . . ?
N3 C6 C7 120.6(3) . . ?
C8 C6 C7 121.7(3) . . ?
C6 C7 H29A 109.5 . . ?
C6 C7 H29B 109.5 . . ?
H29A C7 H29B 109.5 . . ?
C6 C7 H29C 109.5 . . ?
H29A C7 H29C 109.5 . . ?
H29B C7 H29C 109.5 . . ?
C9 C8 C13 119.9(3) . . ?
C9 C8 C6 118.2(3) . . ?
C13 C8 C6 121.9(3) . . ?
C10 C9 C8 120.8(3) . . ?
C10 C9 H6 119.6 . . ?
C8 C9 H6 119.6 . . ?
C11 C10 C9 121.1(3) . . ?
C11 C10 Cl1 119.3(3) . . ?
C9 C10 Cl1 119.6(3) . . ?
C10 C11 C12 118.3(3) . . ?
C10 C11 H7 120.8 . . ?
C12 C11 H7 120.8 . . ?
C11 C12 C13 123.6(3) . . ?
C11 C12 N4 116.4(3) . . ?
C13 C12 N4 120.0(3) . . ?
O1 C13 C12 119.5(3) . . ?
O1 C13 C8 124.0(3) . . ?
C12 C13 C8 116.3(3) . . ?
O4 C14 O5 125.8(3) . . ?
O4 C14 C15 116.7(3) . . ?
O5 C14 C15 117.5(3) . . ?
C16 C15 C17 118.4(3) . 5_756 ?
C16 C15 C14 120.9(3) . . ?
C17 C15 C14 120.5(3) 5_756 . ?
C17 C16 C15 120.7(3) . . ?
C17 C16 Cl2 120.0(3) . . ?
C15 C16 Cl2 119.3(2) . . ?
C16 C17 C15 120.9(3) . 5_756 ?
C16 C17 Cl3 120.8(3) . . ?
C15 C17 Cl3 118.4(2) 5_756 . ?

loop_
 _geom_torsion_atom_site_label_1
 _geom_torsion_atom_site_label_2
 _geom_torsion_atom_site_label_3
 _geom_torsion_atom_site_label_4
 _geom_torsion
 _geom_torsion_site_symmetry_1
 _geom_torsion_site_symmetry_2
 _geom_torsion_site_symmetry_3
 _geom_torsion_site_symmetry_4
 _geom_torsion_publ_flag
O1 Fe1 O1 C13 -55.7(2) 2_655 . . . ?
N3 Fe1 O1 C13 -147.1(2) 2_655 . . . ?
N3 Fe1 O1 C13 36.8(2) . . . . ?
N1 Fe1 O1 C13 131.3(2) 2_655 . . . ?
C1 N2 N3 C6 -164.3(3) . . . . ?
C1 N2 N3 Fe1 25.1(3) . . . . ?
C5 N1 C1 N2 177.3(3) . . . . ?
Fe1 N1 C1 N2 0.2(4) . . . . ?
C5 N1 C1 C2 -3.5(5) . . . . ?
Fe1 N1 C1 C2 179.4(3) . . . . ?
N3 N2 C1 N1 -16.7(4) . . . . ?
N3 N2 C1 C2 164.1(3) . . . . ?
N1 C1 C2 C3 2.5(5) . . . . ?
N2 C1 C2 C3 -178.3(3) . . . . ?
C1 C2 C3 C4 0.0(5) . . . . ?
C2 C3 C4 C5 -1.4(5) . . . . ?
C1 N1 C5 C4 2.0(5) . . . . ?
Fe1 N1 C5 C4 178.6(3) . . . . ?
C3 C4 C5 N1 0.4(5) . . . . ?
N2 N3 C6 C8 178.0(3) . . . . ?
Fe1 N3 C6 C8 -13.5(4) . . . . ?
N2 N3 C6 C7 -1.5(4) . . . . ?
Fe1 N3 C6 C7 167.1(2) . . . . ?
N3 C6 C8 C9 -158.3(3) . . . . ?
C7 C6 C8 C9 21.1(5) . . . . ?
N3 C6 C8 C13 21.4(5) . . . . ?
C7 C6 C8 C13 -159.2(3) . . . . ?
C13 C8 C9 C10 -0.1(5) . . . . ?
C6 C8 C9 C10 179.6(3) . . . . ?
C8 C9 C10 C11 -1.0(5) . . . . ?
C8 C9 C10 Cl1 179.5(2) . . . . ?
C9 C10 C11 C12 1.5(5) . . . . ?
Cl1 C10 C11 C12 -179.1(2) . . . . ?
C10 C11 C12 C13 -0.9(5) . . . . ?
C10 C11 C12 N4 179.7(3) . . . . ?
O2 N4 C12 C11 150.8(3) . . . . ?
O3 N4 C12 C11 -27.8(4) . . . . ?
O2 N4 C12 C13 -28.6(5) . . . . ?
O3 N4 C12 C13 152.7(3) . . . . ?
Fe1 O1 C13 C12 145.5(2) . . . . ?
Fe1 O1 C13 C8 -39.6(4) . . . . ?
C11 C12 C13 O1 175.1(3) . . . . ?
N4 C12 C13 O1 -5.5(4) . . . . ?
C11 C12 C13 C8 -0.1(5) . . . . ?
N4 C12 C13 C8 179.3(3) . . . . ?
C9 C8 C13 O1 -174.4(3) . . . . ?
C6 C8 C13 O1 6.0(5) . . . . ?
C9 C8 C13 C12 0.6(4) . . . . ?
C6 C8 C13 C12 -179.0(3) . . . . ?
O4 C14 C15 C16 -74.2(4) . . . . ?
O5 C14 C15 C16 105.1(4) . . . . ?
O4 C14 C15 C17 100.3(4) . . . 5_756 ?
O5 C14 C15 C17 -80.4(4) . . . 5_756 ?
C17 C15 C16 C17 -1.5(5) 5_756 . . . ?
C14 C15 C16 C17 173.1(3) . . . . ?
C17 C15 C16 Cl2 177.3(2) 5_756 . . . ?
C14 C15 C16 Cl2 -8.1(4) . . . . ?
C15 C16 C17 C15 1.6(5) . . . 5_756 ?
Cl2 C16 C17 C15 -177.2(2) . . . 5_756 ?
C15 C16 C17 Cl3 -179.3(3) . . . . ?
Cl2 C16 C17 Cl3 1.9(4) . . . . ?

#==============================================================================
loop_
_geom_hbond_atom_site_label_D
_geom_hbond_atom_site_label_H
_geom_hbond_atom_site_label_A
_geom_hbond_site_symmetry_D
_geom_hbond_site_symmetry_H
_geom_hbond_site_symmetry_A
_geom_hbond_distance_DA
_geom_hbond_distance_DH
_geom_hbond_distance_HA
_geom_hbond_angle_DHA
_geom_hbond_publ_flag
N2 H5 O4 . . 6_555 2.892(4) 0.79(4) 2.16(4) 155(3) no
N2 H5 N3 . . . 1.394(4) 0.79(4) 1.90(4) 40.0(19) no

#==============================================================================
# Additional structures and associated data_? identifiers
# should be added at this point if there is more than one 
# structure analysis in the CIF.

_shelx_res_file
;

    shelxl.res created by SHELXL-2014/7

TITL fr1373
CELL  0.71075 12.47940 30.59340 9.46940 90.00000 96.79460 90.00000
ZERR  4 0.00480 0.01060 0.00330 0.00000 0.00840 0.00000
LATT 7
SYMM    -X,    +Y, .50-Z
SFAC C H N O CL FE
UNIT 136 84 32 40 24 4
L.S. 10
FMAP 2
PLAN 25
WPDB -2
HTAB
BOND $H
CONF
LIST 4
TEMP -149.8
ACTA
SIZE 0.200 0.200 0.200
WGHT    0.007000   17.988400
FVAR       0.61704
FE1   6    0.500000    0.155130    0.250000    10.50000    0.01228    0.01732 =
         0.01686    0.00000    0.00275    0.00000
CL1   5    0.862521    0.334142    0.244834    11.00000    0.02250    0.02455 =
         0.03236    0.00233    0.00382   -0.00774
CL2   5    0.820305    0.022091    0.252905    11.00000    0.01775    0.02445 =
         0.02011    0.00089   -0.00300    0.00066
CL3   5    0.951294    0.097326    0.420597    11.00000    0.02108    0.01775 =
         0.02408    0.00225   -0.00005   -0.00010
O1    4    0.562062    0.196763    0.377129    11.00000    0.01671    0.02079 =
         0.01840   -0.00071    0.00575   -0.00216
O2    4    0.459843    0.261165    0.482711    11.00000    0.02455    0.03996 =
         0.05437   -0.02641    0.01816   -0.01161
O3    4    0.572024    0.308325    0.586226    11.00000    0.02355    0.02457 =
         0.02329   -0.00779   -0.00007    0.00201
O4    4    0.778210   -0.073886    0.402213    11.00000    0.01730    0.02662 =
         0.02702    0.00121    0.00530   -0.00399
O5    4    0.903571   -0.093512    0.265412    11.00000    0.01812    0.02716 =
         0.02488   -0.00688    0.00369   -0.00325
N1    3    0.454023    0.108537    0.111609    11.00000    0.01416    0.02007 =
         0.01651    0.00189    0.00182   -0.00061
N2    3    0.633736    0.112747    0.084048    11.00000    0.01317    0.02138 =
         0.02219   -0.00240    0.00735   -0.00069
N3    3    0.628682    0.152180    0.156710    11.00000    0.01639    0.01655 =
         0.01611   -0.00283    0.00326   -0.00093
N4    3    0.547412    0.279906    0.495544    11.00000    0.01885    0.01864 =
         0.02300   -0.00495    0.00313   -0.00015
C1    1    0.535465    0.093446    0.044460    11.00000    0.01686    0.01669 =
         0.01724   -0.00007    0.00330   -0.00201
C2    1    0.521432    0.060264   -0.056534    11.00000    0.02617    0.02594 =
         0.02305   -0.00350    0.00696    0.00079
AFIX  43
H1    2    0.580636    0.049234   -0.100148    11.00000   -1.20000
AFIX   0
C3    1    0.418698    0.043928   -0.091182    11.00000    0.03135    0.02648 =
         0.02033   -0.00678    0.00228   -0.00673
AFIX  43
H2    2    0.406369    0.021255   -0.159726    11.00000   -1.20000
AFIX   0
C4    1    0.333091    0.060512   -0.026191    11.00000    0.02016    0.03307 =
         0.02374   -0.00316    0.00123   -0.00871
AFIX  43
H3    2    0.261830    0.049882   -0.051055    11.00000   -1.20000
AFIX   0
C5    1    0.353748    0.092451    0.074273    11.00000    0.01530    0.02643 =
         0.02200   -0.00243    0.00192   -0.00289
AFIX  43
H4    2    0.295604    0.103746    0.119464    11.00000   -1.20000
AFIX   0
C6    1    0.712938    0.177599    0.169402    11.00000    0.01533    0.01983 =
         0.01530    0.00311    0.00411    0.00010
C7    1    0.813694    0.164225    0.110315    11.00000    0.01365    0.02377 =
         0.02385   -0.00251    0.00339   -0.00128
AFIX 137
H29A  2    0.873544    0.182919    0.150119    11.00000   -1.20000
H29B  2    0.803406    0.167281    0.006576    11.00000   -1.20000
H29C  2    0.830284    0.133692    0.135458    11.00000   -1.20000
AFIX   0
C8    1    0.704670    0.219631    0.242059    11.00000    0.01453    0.01750 =
         0.01807   -0.00235    0.00051    0.00119
C9    1    0.776446    0.253165    0.215026    11.00000    0.01166    0.02573 =
         0.01979    0.00013    0.00314    0.00002
AFIX  43
H6    2    0.828645    0.248018    0.151595    11.00000   -1.20000
AFIX   0
C10   1    0.772051    0.293569    0.279607    11.00000    0.01410    0.01865 =
         0.02374    0.00247   -0.00148   -0.00461
C11   1    0.696371    0.302323    0.370322    11.00000    0.01792    0.01731 =
         0.02315   -0.00240   -0.00103    0.00090
AFIX  43
H7    2    0.692520    0.330327    0.412778    11.00000   -1.20000
AFIX   0
C12   1    0.625799    0.269213    0.398239    11.00000    0.01211    0.02375 =
         0.01728   -0.00278    0.00176   -0.00051
C13   1    0.626398    0.227101    0.337053    11.00000    0.01390    0.01841 =
         0.01680    0.00063   -0.00031    0.00168
C14   1    0.867128   -0.070078    0.360606    11.00000    0.01741    0.01829 =
         0.01687    0.00292    0.00068   -0.00120
C15   1    0.939375   -0.033760    0.427779    11.00000    0.01451    0.01989 =
         0.01681   -0.00207    0.00312   -0.00429
C16   1    0.918802    0.009757    0.391735    11.00000    0.01321    0.02411 =
         0.01642    0.00181    0.00043   -0.00005
C17   1    0.977702    0.043140    0.464047    11.00000    0.01546    0.01717 =
         0.01898    0.00088    0.00695    0.00157
H5    2    0.677787    0.109929    0.031958    11.00000    0.01518
H13   2    1.000000   -0.090604    0.250000    10.50000    0.12610
HKLF 4

REM  fr1373
REM R1 =  0.0581 for    3586 Fo > 4sig(Fo)  and  0.0692 for all    4069 data
REM    274 parameters refined using      0 restraints

END

WGHT      0.0068     17.9892

REM Instructions for potential hydrogen bonds
EQIV $1 x, -y, z-1/2
HTAB C2 O4_$1
EQIV $2 -x+1, y, -z+1/2
HTAB C5 N3_$2
EQIV $3 x+1/2, -y+1/2, z-1/2
HTAB C7 O2_$3
EQIV $4 -x+3/2, -y+1/2, -z+1
HTAB C7 O3_$4
HTAB C7 O3_$3
EQIV $5 -x+3/2, -y+1/2, -z
HTAB C7 Cl1_$5
HTAB C9 O2_$3
HTAB N2 O4_$1
EQIV $6 -x+2, y, -z+1/2
HTAB O5 O5_$6

REM Highest difference peak  0.468,  deepest hole -0.534,  1-sigma level  0.104
Q1    1   1.0000  0.0188  0.2500  10.50000  0.05    0.47
Q2    1   0.5000  0.0963  0.2500  10.50000  0.05    0.46
Q3    1   0.4836  0.1089  0.0625  11.00000  0.05    0.44
Q4    1   0.5000 -0.0398 -0.2500  10.50000  0.05    0.43
Q5    1   0.4762  0.1287  0.1613  11.00000  0.05    0.41
Q6    1   0.7043  0.1996  0.1957  11.00000  0.05    0.41
Q7    1   0.8744  0.2289  0.0839  11.00000  0.05    0.40
Q8    1   0.7653  0.2288  0.4277  11.00000  0.05    0.40
Q9    1   0.5952  0.1689  0.2134  11.00000  0.05    0.39
Q10   1   0.9374  0.0277  0.4726  11.00000  0.05    0.38
Q11   1   0.4719  0.0526 -0.0878  11.00000  0.05    0.37
Q12   1   0.8852  0.3592  0.3390  11.00000  0.05    0.36
Q13   1   0.5063  0.1859  0.3177  11.00000  0.05    0.36
Q14   1   0.8862  0.0490  0.5481  11.00000  0.05    0.36
Q15   1   0.9144  0.3083  0.2365  11.00000  0.05    0.36
Q16   1   0.5785  0.2105  0.5019  11.00000  0.05    0.35
Q17   1   0.4933 -0.0100 -0.0982  11.00000  0.05    0.35
Q18   1   0.6927  0.1610  0.2213  11.00000  0.05    0.35
Q19   1   0.8862  0.0545  0.2503  11.00000  0.05    0.34
Q20   1   0.6391  0.3029  0.2501  11.00000  0.05    0.34
Q21   1   0.8239  0.3595  0.4341  11.00000  0.05    0.34
Q22   1   0.7187  0.1942  0.2335  11.00000  0.05    0.34
Q23   1   0.4697  0.2464  0.4072  11.00000  0.05    0.33
Q24   1   1.0589  0.0821  0.4096  11.00000  0.05    0.33
Q25   1   0.5960  0.1419  0.2372  11.00000  0.05    0.33
;

_shelx_res_checksum   73004

_shelx_hkl_file
;
   0   0  -2 2392.40  140.44
   0   0   2 2504.83   58.94
   0   0   2 2556.86   70.32
   0   0  -2 2446.51  159.75
   0   0  -3   24.68   23.81
   0   0   3   21.34   14.67
   0   0   3   39.91   12.20
   0   0  -3   26.15   12.30
   0   0  -4 1601.22  112.27
   0   0   4 1660.78  110.54
   0   0   4 1483.11  106.57
   0   0  -4 1821.38  131.29
   0   0  -5   22.09   12.05
   0   0   5   29.16   17.54
   0   0   5   65.58   28.78
   0   0  -5    3.91   20.22
   0   0  -645568.23 2202.89
   0   0   643254.27 1349.42
   0   0   644334.29 1397.37
   0   0  -645717.20 2215.27
   0   0  -7   62.33   29.96
   0   0   7   51.03   17.35
   0   0  -8 8718.88  614.04
   0   0   8 8105.10  571.55
   0   0   8 9349.98  668.99
   0   0  -9   11.44   26.08
   0   0   9  132.08   63.34
   0   0 -10 2362.32  241.49
   0   0  10 1433.59  405.66
   0   0  11   40.83   46.68
   0   0  12 4948.27  818.38
   0   2  -2 8404.31  174.39
   0   2  -2 8270.57  183.66
   0   2   2 8017.93  170.05
   0   2   2 8079.23  175.56
   0  -2  -2 7927.53  168.69
   0  -2   2 8013.60  177.48
   0  -2  -2 8421.55  184.84
   0  -2   2 7846.27  164.20
   0   2  -316654.65  353.95
   0   2  -317843.31  366.65
   0   2   316818.15  350.09
   0   2   317103.74  361.79
   0  -2   317237.62  355.59
   0  -2   317823.00  381.04
   0  -2  -318136.27  380.74
   0  -2  -316830.04  349.94
   0   2  -4  204.06   29.07
   0   2  -4  230.81   35.49
   0   2   4  211.01   31.99
   0   2   4  195.01   33.16
   0  -2   4  212.11   20.50
   0  -2   4  203.27   34.10
   0  -2  -4  206.72   39.29
   0  -2  -4  253.11   52.90
   0   2  -5   44.85   22.90
   0   2  -5   43.07   13.75
   0   2   5   24.01   23.45
   0   2   5  -11.19   26.52
   0  -2   5   25.43   14.58
   0  -2   5   84.27   37.21
   0  -2  -5   14.52   20.66
   0  -2  -5   27.72   13.31
   0   2  -6 4241.18  143.42
   0   2   6 4419.05  166.07
   0   2   6 4236.85  146.01
   0   2  -6 4312.76  159.82
   0  -2   6 4004.63  136.81
   0  -2   6 4189.49  184.83
   0  -2  -6 4094.69  151.29
   0  -2  -6 4384.66  151.54
   0   2  -7  213.63   43.30
   0   2   7  244.50   49.07
   0   2   7  237.15   41.47
   0  -2   7  185.14   30.21
   0  -2  -7  211.91   44.48
   0  -2   7  410.08   96.43
   0  -2  -7  156.67   46.50
   0   2  -8  860.82  143.20
   0   2   8  957.80  178.05
   0  -2  -8  789.75  162.26
   0  -2   8  528.08  138.75
   0  -2   8 1188.72  145.81
   0   2  -9  287.72   73.11
   0   2   9  408.21   81.98
   0  -2  -9  343.45   55.47
   0  -2   9  460.51   84.27
   0   2  10  118.00   46.93
   0  -2 -10  202.76   40.81
   0  -2  10  202.21   74.35
   0   2  11  669.12  211.48
   0  -2  11  664.69  195.77
   0  -2 -12   86.05   40.10
   0  -2  12  118.05   82.43
   0   4  -1 2986.19   65.75
   0   4  -1 2986.95   72.97
   0   4   1 3139.22   73.90
   0   4   1 3127.99   68.45
   0  -4   1 2942.10   62.02
   0  -4   1 3203.91   77.46
   0  -4  -1 3086.56   70.55
   0   4  -2   10.86    4.92
   0   4  -2   43.20   22.37
   0   4   2   26.77   19.53
   0   4   2   80.32   29.75
   0  -4   2   19.16    6.77
   0  -4   2   36.74   24.24
   0  -4  -2   60.24   19.44
   0  -4  -2   33.69   12.75
   0   4  -3 5151.99  109.86
   0   4  -3 5657.58  141.53
   0   4   3 5250.69  119.91
   0   4   3 4990.07  119.21
   0  -4   3 5100.03  111.10
   0  -4   3 5553.11  137.83
   0  -4  -3 5328.90  125.89
   0  -4  -3 5176.51  118.71
   0   4  -4 2529.23   56.32
   0   4   4 2492.29   66.17
   0   4   4 2404.41   70.66
   0   4  -4 2675.75   84.44
   0  -4  -4 2529.71   68.89
   0  -4   4 2658.91   85.15
   0  -4   4 2592.76   57.56
   0  -4  -4 2369.19   63.33
   0   4  -5 4537.24  136.50
   0   4   5 4936.16  165.67
   0   4   5 4676.16  146.43
   0   4  -5 4396.25  148.12
   0  -4  -5 4824.12  153.52
   0  -4   5 4685.18  168.30
   0  -4   5 4346.83  130.95
   0  -4  -5 4212.97  136.51
   0   4  -6 3166.34  108.43
   0   4   6 3261.92  118.94
   0   4  -6 3200.70  126.39
   0   4   6 3298.97  131.01
   0  -4  -6 3182.28  118.23
   0  -4   6 3411.93  145.01
   0  -4   6 3265.45  112.53
   0  -4  -6 2860.30  108.15
   0   4  -7   16.46   13.40
   0   4   7   62.74   30.92
   0   4   7   31.29   24.35
   0  -4   7  101.98   31.08
   0  -4  -7   33.40   17.59
   0  -4   7   64.43   34.51
   0  -4  -7   37.67   19.08
   0   4  -8  341.50   71.95
   0   4   8  355.46   96.08
   0  -4   8  333.41   70.89
   0  -4   8  382.97   79.46
   0  -4  -8  390.92   77.55
   0   4  -9   39.51   17.54
   0   4   9    2.60   37.48
   0  -4   9   21.96   12.63
   0  -4   9   37.72   24.86
   0  -4  -9  111.97   38.66
   0   4  10  202.09   50.41
   0  -4 -10  129.36   46.89
   0  -4  10  139.90   55.95
   0   4  11   69.88   27.88
   0  -4 -11   21.36   16.24
   0  -4  11   82.87   81.25
   0   4  12  173.32   68.67
   0  -4 -12   56.13   29.96
   0  -4  12  169.75   68.70
   0   6   0 2296.28  134.66
   0  -6   0 2277.38  132.34
   0   6  -1 1416.74   95.27
   0   6  -1 1351.17   84.42
   0   6   1 1416.29   86.01
   0   6   1 1394.73   81.72
   0  -6   1 1446.76   93.49
   0  -6   1 1590.68  124.28
   0  -6  -1 1568.02   94.59
   0  -6  -1 1517.64   90.31
   0   6   254171.67 1100.68
   0   6   257049.28 1157.48
   0   6  -252281.05 1069.09
   0  -6   254012.54 1088.05
   0  -6   254777.46 1120.70
   0  -6  -255505.27 1128.06
   0  -6  -255595.04 1124.37
   0   6  -325128.61  509.35
   0   6  -325182.55  539.46
   0   6   324421.50  506.05
   0   6   326597.40  553.00
   0  -6  -323287.79  484.65
   0  -6   322999.72  488.44
   0  -6   324653.18  500.25
   0  -6  -327623.83  568.10
   0   6  -4 3569.27   74.71
   0   6  -4 3709.44   98.85
   0   6   4 3704.64   87.68
   0   6   4 3808.62   93.46
   0  -6  -4 3643.48   88.83
   0  -6   4 3318.15  111.57
   0  -6   4 3580.67   71.78
   0  -6  -4 3764.54   86.20
   0   6  -5  312.91   44.79
   0   6   5  345.47   55.80
   0   6   5  333.47   44.28
   0   6  -5  283.93   57.48
   0  -6  -5  339.87   56.55
   0  -6   5  321.77   42.83
   0  -6   5  364.11   49.13
   0  -6  -5  277.93   37.26
   0   6  -6  876.11   50.58
   0   6   6  720.39   58.72
   0   6   6  897.20   58.54
   0   6  -6  762.34  152.53
   0  -6  -6  862.75   58.09
   0  -6   6  852.46  143.19
   0  -6   6  820.89   46.01
   0  -6  -6  903.82   67.12
   0   6  -7   14.11    8.32
   0   6   7   47.54   29.10
   0  -6   7   20.20   10.50
   0  -6   7   55.89   47.20
   0  -6  -7   57.87   24.01
   0  -6  -7   47.51   22.10
   0   6  -8 6219.49  486.24
   0   6   8 6987.61  559.47
   0  -6   8 5868.89  459.07
   0  -6   8 6643.85  534.86
   0  -6  -8 6536.11  516.09
   0   6  -9 1375.01  112.33
   0   6   9 1396.58  132.56
   0  -6  -9 1152.34  131.95
   0  -6   9 1398.90  193.11
   0   6  10 2158.68  371.03
   0  -6 -10 2692.87  275.63
   0  -6  10 2450.01  474.55
   0   6  11   60.68   46.90
   0  -6 -11   67.77   27.44
   0  -6  11   85.54   54.10
   0   6  12  378.77  107.00
   0  -6 -12  203.79  121.46
   0  -6  12  413.96  128.97
   0   8   0 8136.12  183.12
   0  -8   0 9019.21  189.94
   0   8   1 2709.77   61.75
   0   8   1 2664.74   66.95
   0   8  -1 2922.35   90.11
   0  -8   1 2685.83   60.52
   0  -8   1 3086.77   85.86
   0  -8   1 2595.04   77.84
   0  -8  -1 2771.32   69.86
   0  -8  -1 2811.30   63.87
   0   8  -2  962.08   90.35
   0   8  -2  797.94   59.34
   0   8   2  803.28   60.22
   0   8   2  797.23   50.78
   0  -8   2  760.48   44.74
   0  -8   2  781.80   58.66
   0  -8  -2  853.57   57.93
   0  -8  -2  772.19   47.90
   0   8  -323745.05  417.67
   0   8  -324339.59  453.75
   0   8   323974.09  436.61
   0   8   323432.18  424.89
   0  -8   324758.78  433.77
   0  -8   324920.36  466.22
   0  -8  -325547.93  465.18
   0  -8  -324652.00  439.40
   0   8  -4 1666.88   51.52
   0   8   4 1906.10   70.57
   0   8   4 1853.79   72.28
   0   8  -4 2114.39   94.43
   0  -8  -4 1906.32   88.46
   0  -8   4 1987.46   88.13
   0  -8   4 1763.33   61.39
   0  -8  -4 2130.89   82.13
   0   8  -5   37.76    8.92
   0   8  -5   57.57   29.41
   0   8   5   31.09   23.30
   0   8   5   68.75   28.95
   0  -8  -5   92.99   46.58
   0  -8   5   -1.31   27.87
   0  -8   5   55.33   10.19
   0  -8  -5   92.37   22.05
   0   8  -6   49.47   15.62
   0   8   6   40.44   33.39
   0   8   6   39.52   25.99
   0  -8  -6  -13.08   24.30
   0  -8   6   70.26   21.48
   0  -8   6   17.49    9.64
   0  -8  -6   22.27   19.58
   0   8  -7  469.95   66.97
   0   8   7  562.07  109.27
   0  -8   7  414.13   62.94
   0  -8   7  622.64   89.52
   0  -8  -7  478.76   64.51
   0  -8  -7  367.05   73.57
   0   8  -8   35.65   14.69
   0   8   8   63.90   33.38
   0  -8   8  -37.94   37.55
   0   8  -9 5252.08  474.69
   0   8   9 5209.63  490.80
   0  -8  -9 5768.51  526.27
   0  -8   9 5021.78  716.83
   0   8  10  194.01   64.23
   0  -8 -10  172.25   52.05
   0  -8  10  154.48   59.57
   0   8  11   78.63   48.35
   0  -8 -11   52.11   28.98
   0  -8  11  115.64   81.59
   0  10   0 1392.66   97.75
   0 -10   0 1474.73   99.77
   0 -10   0 1597.06   96.36
   0  10   113822.15  285.49
   0  10   113626.35  286.84
   0  10  -113233.13  287.22
   0 -10   114128.33  323.76
   0 -10   113890.11  302.35
   0 -10  -113108.75  276.88
   0 -10   113603.36  280.63
   0 -10  -113609.81  280.92
   0  10   2 2530.88   62.63
   0  10   2 2498.70   68.93
   0  10  -2 2414.04  179.36
   0 -10   2 2257.45  131.24
   0 -10   2 2215.15  139.89
   0 -10  -2 2603.37   71.02
   0 -10   2 2470.91   54.37
   0 -10  -2 2747.79   63.15
   0  10  -310183.29  189.72
   0  10  -3 9053.87  209.79
   0  10   3 9231.99  182.87
   0  10   3 9604.57  184.92
   0 -10   3 9015.79  159.66
   0 -10   3 9526.86  203.85
   0 -10  -3 9146.63  184.83
   0 -10  -310501.95  195.25
   0  10  -4 9850.22  280.57
   0  10  -410993.54  335.67
   0  10   411455.74  337.78
   0  10   412586.15  369.45
   0 -10  -411087.60  329.13
   0 -10   410914.39  333.96
   0 -10   411082.88  313.66
   0 -10  -411458.77  330.95
   0  10   5 3039.63  115.40
   0  10   5 3031.05  123.04
   0  10  -5 3184.97  129.94
   0 -10  -5 2891.18  110.38
   0 -10   5 2779.54  124.67
   0 -10   5 2829.20   95.05
   0  10  -6 1739.17   91.66
   0  10   6 1646.88  100.12
   0 -10   6 1713.01   90.42
   0 -10   6 1856.32  131.12
   0 -10  -6 1904.08  141.22
   0 -10  -6 1507.24   90.39
   0  10  -7 3503.00  247.40
   0  10   7 3653.61  271.66
   0 -10   7 3099.29  219.98
   0 -10   7 3256.70  251.98
   0 -10  -7 3375.40  253.29
   0  10  -8  459.02   83.33
   0  10   8  666.85  126.54
   0 -10  -8  616.38  163.20
   0 -10   8  748.09  149.05
   0  10  -9 2947.87  268.10
   0  10   9 3063.10  291.61
   0 -10  -9 3038.47  286.90
   0 -10   9 3023.93  412.49
   0  10  10 1237.92  240.56
   0 -10 -10 1274.06  144.95
   0 -10  10 1137.47  123.23
   0  10  11  505.99  134.67
   0 -10 -11  357.77  112.49
   0 -10  11  546.00  162.90
   0  12   012950.29  270.80
   0  12   012655.52  275.93
   0 -12   012892.16  271.54
   0 -12   012986.78  298.35
   0  12   1 7643.63  150.00
   0  12  -1 7728.99  163.05
   0  12   1 7642.58  143.57
   0 -12   1 7823.64  174.70
   0 -12   1 7654.04  144.16
   0 -12  -1 7570.82  149.73
   0  12   2 7661.16  165.42
   0  12  -2 7489.44  162.60
   0  12   2 8828.77  168.53
   0 -12   2 8194.89  188.76
   0 -12  -2 7882.83  158.34
   0 -12   2 7914.35  144.63
   0 -12  -2 8387.88  155.74
   0  12   330367.22  871.77
   0  12   333893.60 2013.28
   0  12  -328862.13  832.64
   0 -12   329907.75  863.02
   0 -12  -330216.65  862.76
   0 -12  -330799.98  869.58
   0  12  -4 2348.90   92.69
   0  12  -4 1921.54  172.61
   0  12   4 1961.20   97.84
   0 -12   4 2148.49  132.93
   0 -12  -4 2133.26  103.25
   0 -12   4 2122.69   67.15
   0 -12  -4 2360.41   82.58
   0  12  -5 3841.16  125.98
   0  12   5 3655.39  133.96
   0 -12  -5 3446.57  128.40
   0 -12  -5 3441.89  123.64
   0  12  -6 2889.49  135.69
   0  12   6 2661.86  168.71
   0 -12  -6 2871.92  152.13
   0 -12   6 2571.81  148.86
   0 -12  -6 2371.69  144.20
   0  12  -7 1365.80  153.23
   0  12   7 1259.12  145.55
   0 -12  -7 1441.99  161.76
   0 -12   7 1253.01  151.84
   0 -12  -7  920.67  102.38
   0  12  -8  299.15  102.19
   0  12  -8  419.71   69.11
   0  12   8  732.14  171.38
   0 -12  -8  739.64  162.69
   0 -12   8  883.36  140.97
   0  12  -9  523.94   31.39
   0  12   9  630.50   97.10
   0 -12  -9  601.71   80.23
   0 -12   9  779.70   96.64
   0  12  10  288.67  128.09
   0 -12  10  444.90   93.83
   0  12  11   55.92   37.11
   0 -12 -11   84.66   41.03
   0  14   0 6616.47  133.32
   0  14   0 6807.05  154.68
   0 -14   0 7000.80  138.90
   0 -14   0 5959.19  156.34
   0  14   1 4789.73  103.08
   0  14  -1 4930.55  133.66
   0  14   1 4892.03   97.93
   0 -14   1 5082.60  132.09
   0 -14  -1 4980.19  109.31
   0 -14   1 4726.16   96.51
   0  14   2  803.32   74.22
   0  14  -2  723.05   72.86
   0  14   2  857.41   76.17
   0 -14  -2  771.86   72.22
   0 -14   2  777.22   68.25
   0 -14   2  927.16  140.51
   0 -14   2  678.95  104.25
   0 -14  -2  770.37   72.59
   0  14   3   81.12   23.38
   0  14   3   36.01   24.85
   0  14  -3  107.91   33.42
   0 -14  -3   22.56   25.57
   0 -14   3   24.21    5.69
   0 -14   3  101.38   37.04
   0 -14   3   62.92   11.03
   0 -14  -3   14.51   10.25
   0  14  -4   34.41   23.94
   0  14   4   26.76   22.38
   0  14   4    5.40   12.97
   0 -14   4   48.56   27.29
   0 -14  -4   53.85   21.17
   0 -14  -4   22.60   13.08
   0  14   5 1178.45  106.04
   0 -14  -5 1059.27   78.48
   0 -14   5 1192.27  101.26
   0  14   6 3099.74  186.96
   0 -14  -6 2968.04  181.21
   0 -14   6 2604.29  194.13
   0 -14  -6 3015.66  175.79
   0  14   7  271.75   82.27
   0 -14  -7  198.85   55.02
   0 -14   7  291.52   68.00
   0 -14  -7  116.31   32.28
   0  14   8 1051.99  102.92
   0 -14  -8 1006.95  167.86
   0 -14   8  947.83  157.32
   0 -14  -8  533.16  107.08
   0  14   9  154.29   43.28
   0 -14  -9  152.24   49.89
   0 -14   9  246.52   59.17
   0 -14 -10   31.59   34.46
   0 -14  10   51.92   59.13
   0 -14 -11 1321.93  237.87
   0 -14  11 1273.31  301.89
   0  16   023996.69  682.25
   0  16   023148.81  668.91
   0 -16   024613.42  701.56
   0 -16   023734.35  710.74
   0  16  -1 1184.30   84.07
   0  16   1 1309.68   83.51
   0 -16  -1 1294.49  100.75
   0 -16  -1 1321.39   88.39
   0 -16   1 1422.24  209.05
   0 -16   1 1287.26   87.22
   0  16   2 7020.84  241.41
   0  16  -2 7528.54  264.17
   0  16   2 7339.08  234.44
   0 -16   2 7069.25  234.19
   0 -16   2 7488.82  237.29
   0 -16  -2 7063.36  233.77
   0  16   3 6275.09  210.55
   0  16  -3 6120.64  216.24
   0  16   3 5863.24  191.33
   0 -16  -3 6165.34  209.38
   0 -16   3 6126.92  219.17
   0 -16   3 5975.34  188.23
   0 -16   3 6976.54  220.46
   0 -16  -3 6500.09  207.81
   0  16   410504.94  535.20
   0 -16  -4 9613.87  494.60
   0 -16   411056.63  575.66
   0 -16  -410537.26  533.22
   0  16   5 3399.52  165.98
   0 -16  -5 3853.95  192.99
   0 -16   5 3531.31  278.87
   0 -16  -5 3672.74  173.60
   0  16   6 9706.31  686.15
   0 -16  -6 9092.57  644.51
   0 -16   6 9708.17  825.32
   0 -16  -6 8387.20  587.89
   0  16   7 1912.10  200.88
   0 -16  -7 2046.19  160.85
   0 -16   7 2479.84  326.43
   0 -16  -7 1904.12  149.68
   0  16   8 1267.37  184.17
   0 -16  -8 1153.16  190.45
   0 -16   8 1279.78  150.36
   0  16   9  940.02  207.17
   0 -16  -9  766.18  266.51
   0 -16   9 1285.33  213.08
   0 -16 -10 2363.45  210.43
   0 -16  10 1861.31  362.78
   0  18   0 1158.87   85.40
   0  18   0 1187.70  133.18
   0 -18   0 1197.01  115.20
   0 -18   0 1160.97  149.25
   0  18   1  818.96   62.68
   0  18   1  861.64  104.90
   0  18  -1  883.70   92.17
   0 -18   1 1004.48  133.93
   0 -18  -1  766.37  150.87
   0 -18   1  836.71   56.94
   0 -18  -1  714.32   74.59
   0  18  -2   95.77   36.11
   0  18   2   19.58   11.59
   0 -18  -2  155.57   59.97
   0 -18  -2   71.22   24.63
   0 -18   2   82.74   28.54
   0 -18   2   28.34    9.34
   0  18   3 5896.16  307.17
   0  18  -3 5876.87  318.48
   0  18   3 5506.70  283.23
   0 -18  -3 6284.89  343.51
   0 -18   3 6561.90  358.80
   0 -18   3 6617.87  334.97
   0 -18   3 6375.44  324.01
   0 -18  -3 6914.22  351.76
   0  18   4  556.87   83.14
   0 -18  -4  755.71  116.86
   0 -18   4  650.35  121.28
   0 -18  -4  619.34  110.70
   0  18   5  812.82  121.48
   0 -18  -5  828.24   97.44
   0 -18   5  781.07  150.18
   0 -18  -5  732.94  101.96
   0  18   6   39.23   22.73
   0 -18  -6   45.45   33.69
   0 -18   6   99.34   38.32
   0 -18  -6    4.51    7.26
   0  18   7   19.57   26.01
   0 -18  -7   39.96   21.67
   0 -18   7  -47.61   51.66
   0 -18  -8  176.67   30.73
   0 -18   8   82.29   38.03
   0 -18  -9   51.27   41.24
   0 -18   9  105.55   61.48
   0 -18 -10   55.02   25.41
   0  20   0 2823.84  106.88
   0  20   0 2777.81  166.20
   0 -20   0 2933.56  118.92
   0 -20   0 2684.90  172.94
   0  20   1  194.54   38.85
   0  20  -1  225.80   37.16
   0  20   1  145.47   30.16
   0 -20  -1  236.30   37.69
   0 -20   1  163.80   43.34
   0 -20   1  256.50   50.06
   0 -20  -1  315.82   73.45
   0  20  -2 1013.68  204.17
   0  20   2 1477.56  106.16
   0 -20  -2  907.92  227.02
   0 -20   2 1476.74   86.75
   0 -20   2 1395.45   86.98
   0 -20  -2 1581.00   93.05
   0  20   3  195.73   37.39
   0 -20   3  220.90   42.48
   0 -20  -3  181.43   39.78
   0 -20   3   93.90   20.85
   0  20   4 1150.91  116.99
   0 -20  -4 1220.99  209.08
   0 -20   4 1175.53  141.45
   0 -20   4  869.25   84.33
   0 -20  -4 1001.10  111.16
   0  20   5   97.79   37.17
   0 -20  -5   47.18   22.56
   0 -20   5   65.69   40.51
   0 -20  -5   46.74   16.40
   0  20   6  607.98  119.20
   0 -20  -6  780.23  130.76
   0 -20   6  399.41  109.23
   0 -20  -6  552.75  101.41
   0  20   7 1312.39  184.44
   0 -20  -7 1893.86  187.03
   0 -20   7 1822.11  293.27
   0 -20  -7 1028.89  126.47
   0 -20  -8  577.84  163.41
   0 -20   8  341.36  101.61
   0 -20  -9   28.45   38.66
   0 -20 -10  123.29   42.31
   0 -20  10    8.32   54.46
   0  22   0 3475.14  169.41
   0  22   0 3351.62  170.01
   0 -22   0 3752.30  181.64
   0 -22   0 3088.79  343.74
   0  22  -1 5278.57  250.02
   0  22  -1 5011.18  273.41
   0  22   1 4944.12  239.06
   0  22   1 5359.95  251.61
   0 -22  -1 4978.34  364.96
   0 -22   1 5306.86  250.46
   0 -22  -1 5392.43  256.88
   0 -22   1 5482.84  277.69
   0  22   2 8906.99  411.62
   0 -22  -2 9940.67  464.91
   0 -22   2 8871.66  409.63
   0 -22   2 8834.10  418.14
   0  22   3  768.40  106.16
   0 -22  -3  663.59  113.48
   0 -22   3  661.77   69.41
   0 -22   3  404.33   64.08
   0  22   4 2129.01  158.32
   0 -22   4 1703.71  304.26
   0 -22  -4 2102.94  164.03
   0 -22  -4 1929.06  140.49
   0  22   5 1040.30  183.96
   0 -22  -5 1284.52  188.05
   0 -22   5 1307.55  301.72
   0  22   6 1614.30  205.62
   0 -22  -6 1835.03  163.61
   0 -22   6 1608.22  296.16
   0 -22  -6 1608.21  148.14
   0  22   7 2611.21  234.38
   0 -22  -7 3126.62  204.40
   0 -22   7 3044.68  312.94
   0  22   8 4997.56  453.96
   0 -22  -8 5289.11  120.88
   0 -22   8 5013.94  604.29
   0 -22  -9   49.00   47.76
   0 -22   9  115.50   49.00
   0 -22 -10  585.82  159.13
   0 -22  10  429.06  145.91
   0  24   0 1863.41  113.24
   0  24   0 1787.02  116.87
   0 -24   0 1939.19  119.51
   0 -24   0 1598.11  386.49
   0  24  -1   96.73   30.31
   0  24  -1   22.96   17.75
   0  24   1   22.09   16.08
   0 -24  -1   11.87   23.09
   0 -24   1   92.03   41.19
   0 -24  -1   70.34   33.02
   0 -24   1   15.61   14.58
   0  24   2  164.76   47.13
   0  24   2  271.16   69.51
   0 -24   2  353.97   71.61
   0 -24   2  174.38   51.62
   0 -24  -2  399.33   82.84
   0  24   3 3685.14  264.22
   0 -24  -3 4111.31  298.19
   0 -24   3 4194.82  296.93
   0  24   4  544.35  110.26
   0 -24   4  350.66   53.53
   0 -24  -4  511.84  124.94
   0  24   5   48.97   20.55
   0 -24  -5   90.35   50.91
   0 -24  -5   21.92   11.00
   0  24   6   29.78   28.64
   0 -24  -6   64.96   35.88
   0 -24   6  168.01   50.66
   0  24   7  489.23  105.05
   0 -24  -7  491.48   65.14
   0 -24   7  383.72   97.36
   0 -24  -8  113.20   47.70
   0 -24   8   30.82   20.12
   0 -24  -9  479.35  218.19
   0 -24   9  553.41  200.50
   0  26   0  139.82   39.19
   0  26   0  162.83   58.05
   0 -26   0  247.66   62.11
   0 -26   0  120.10   41.69
   0  26   1 1882.04  245.04
   0  26   1 2658.40  212.58
   0  26  -1 2467.02  199.13
   0 -26   1 1735.65  379.52
   0 -26  -1 2850.78  230.96
   0 -26   1 2807.34  224.19
   0  26   2  135.41   38.04
   0  26   2  126.12   30.01
   0  26  -2  249.27   53.63
   0 -26   2  125.11   47.29
   0 -26  -2  295.92   61.46
   0 -26   2  245.60   56.51
   0  26   3 3479.58  254.00
   0 -26  -3 3501.73  242.63
   0 -26   3 3668.01  244.87
   0 -26   3 2404.06  177.68
   0  26   4 2590.39  210.25
   0 -26  -4 3417.41  273.15
   0 -26   4 2851.91  216.13
   0 -26   4 2467.57  187.28
   0 -26  -5  925.27  166.38
   0  26   6  381.33   67.32
   0 -26  -6  528.36   69.52
   0 -26  -7  595.05  150.58
   0 -26  -8  137.32   34.15
   0 -26  -9   54.18   65.21
   0  28   0 3316.99  226.28
   0 -28   0 3188.23  235.45
   0  28   1 2095.18  145.78
   0  28  -1 2224.19  155.42
   0 -28   1 1977.41  140.60
   0 -28   1 1387.10  116.91
   0 -28  -1 1821.99  156.85
   0  28  -2 1579.32  130.61
   0  28   2 1285.40  127.98
   0 -28  -2 1447.97  227.97
   0 -28   2 1423.87  113.70
   0  28   3 2560.79  217.77
   0 -28   3 2609.94  200.68
   0 -28  -3 2483.11  201.57
   0 -28  -4 1063.11  154.92
   0  28   5   95.91   29.85
   0 -28  -5  297.80   68.88
   0 -28  -6 2447.55  233.98
   0 -28  -7  118.44   53.88
   0 -28  -8 1613.84  279.71
   0  30   0 1387.01   48.25
   0 -30   0 1329.27   49.56
   0  30   1 2792.27  257.05
   0 -30   1 2943.87  271.65
   0  30   2  447.28   71.19
   0  30  -2  491.27  101.36
   0 -30  -2  594.97  149.89
   0  30  -3  294.49   42.55
   0  30   3  207.84   40.99
   0 -30  -3  223.84   42.80
   0 -30   3  215.97   51.06
   0  30   4  784.10   97.76
   0 -30  -4 1153.50  134.52
   0 -30  -5 1362.59  150.98
   0 -30  -6  548.12  169.59
   0 -30  -7  870.17  279.20
   0 -30  -8  137.75   55.07
   0  32   0  961.59  146.59
   0 -32   0 1297.73   55.99
   0  32  -1 1412.82   95.83
   0  32   1 1082.63   84.48
   0 -32  -1 1401.57  100.93
   0 -32   1 1356.91   90.38
   0  32  -2   13.89   22.00
   0  32   2   10.46   15.27
   0 -32   2    6.51   10.69
   0 -32  -2  107.23   26.27
   0  32   3 2741.91  300.60
   0  32  -3 2667.63  271.86
   0 -32  -3 3146.76  321.30
   0  32   4  458.03   92.09
   0 -32  -4  811.17  131.55
   0 -32  -6  344.41  121.67
   0 -32  -7  695.44  147.91
   0  34   0 1644.22  154.85
   0 -34   0 1279.27  123.51
   0  34   1  158.31   49.83
   0  34  -1   83.93   33.35
   0 -34  -1  242.16   71.10
   0 -34   1  122.71   43.42
   0  34   2   32.50   11.82
   0  34  -2   31.92   20.37
   0 -34  -2  134.88   51.35
   0  34   3   34.76   16.46
   0  34  -3   26.19   26.24
   0 -34  -3  117.34   41.78
   0  34  -4   69.37   28.38
   0 -34  -4   54.43   34.17
   0 -34  -5  250.63   77.41
   0  36   0   86.97   29.83
   0 -36   0  177.14   62.03
   0  36  -1  336.19   95.08
   0 -36  -1  596.83  124.18
   0 -36   1  541.58   79.95
   0  36  -2  143.70   52.64
   0 -36  -2  181.40   51.38
   0  36  -4   52.40   22.45
   0 -36  -4   93.36   40.89
   0  36  -5 1282.62  220.05
   0 -36  -5  579.44  277.99
   0  38   0  580.16  109.76
   0  38  -1  783.72  163.45
   0 -38  -1  663.75  257.11
   0  38  -2  101.96   46.54
   0 -38  -2  309.19  116.50
   0  38  -3  464.07  177.57
   0 -38  -3  481.76  205.82
  -1   1  12   81.41   55.30
   1  -1 -12    4.81   10.32
   1  -1 -11   66.58   24.03
  -1   1  10   73.26   46.77
   1  -1 -10  127.48   39.93
  -1  -1  10  400.74   57.29
   1   1  -9 1562.85  127.02
  -1   1   9 1419.20  255.37
   1  -1  -9 1763.02  143.93
  -1  -1   9 1836.05  163.10
   1   1  -8 1215.96  149.99
   1   1  -8 1801.07  324.34
  -1   1   8 1656.56  303.34
   1  -1  -8 1835.22  138.77
  -1  -1   8 1548.61  179.57
   1   1  -7   63.17   27.23
  -1   1   7    0.93   26.06
  -1   1   7   22.67   20.09
   1   1  -7   36.78   30.99
   1  -1  -7   32.83   33.81
  -1  -1   7  -20.57   27.55
  -1  -1   7   24.60   14.39
   1   1  -6  609.36   98.03
   1   1  -6  539.54  105.05
  -1   1   6  506.24   80.76
  -1   1   6  673.65   77.22
  -1  -1   6  523.93   86.49
   1  -1  -6  639.53   67.57
   1  -1  -6  492.02   66.40
  -1  -1   6  567.38   71.66
   1   1  -5 3587.06  112.78
  -1   1   5 3556.24  156.77
  -1   1   5 3615.86  115.43
   1   1  -5 3529.19  122.58
   1  -1  -5 3623.03  115.01
  -1  -1   5 3879.21  137.72
  -1  -1   5 3342.02  106.15
   1  -1  -5 3683.48  124.32
   1   1  -4  196.89   23.34
   1   1  -4  101.67   17.56
  -1   1   4  170.51   21.97
  -1   1   4  115.03   25.89
  -1  -1   4  222.39   32.58
   1  -1  -4  143.17   19.82
  -1  -1   4  177.98   34.22
   1  -1  -4  150.85   29.40
   1   1  -3  382.60   29.09
   1   1  -3  431.01   37.25
  -1   1   3  447.44   35.50
  -1   1   3  369.43   34.46
   1  -1  -3  496.07   73.01
  -1  -1   3  444.50   68.72
  -1  -1   3  403.48   42.40
   1  -1  -3  442.45   72.15
   1   1  -2 3331.71   86.18
   1   1  -2 3258.71   88.32
   1   1  -2 3411.83   74.86
  -1   1   2 3619.40   86.88
   1  -1  -2 3171.15   90.60
  -1  -1   2 3356.89   95.15
   1  -1  -2 3298.41   76.01
   1  -1  -2 3282.94   78.03
  -1   1  -2  320.95   26.49
  -1   1  -2  302.55   33.04
   1   1   2  333.74   62.11
   1   1   2  320.07   24.30
  -1  -1  -2  278.01   23.23
   1  -1   2  343.24   51.03
   1  -1   2  293.72   37.60
  -1  -1  -2  318.58   64.83
  -1   1  -3  783.04   50.39
  -1   1  -3  633.75   52.46
   1   1   3  810.65   52.30
   1   1   3  757.38   57.43
   1  -1   3  742.20   47.48
   1  -1   3  755.92   57.82
  -1  -1  -3  803.43   52.28
  -1  -1  -3  766.58   54.38
  -1   1  -4  992.84   68.87
   1   1   4 1022.51   71.18
  -1   1  -4 1242.53   95.28
   1   1   4 1040.93   79.75
  -1  -1  -4 1012.52   70.87
  -1  -1  -4 1311.66  148.69
   1  -1   4 1144.96   79.18
   1  -1   4  994.97   79.36
  -1   1  -5   42.80   18.94
   1   1   5   46.56   21.24
  -1   1  -5   61.15   41.28
   1   1   5   52.74   19.57
  -1  -1  -5   38.08   11.47
   1  -1   5   20.37   30.97
   1  -1   5   23.38   23.78
  -1  -1  -5   25.84   16.57
  -1   1  -6  157.14   30.62
   1   1   6  271.75   70.66
   1   1   6  171.72   27.47
  -1   1  -6  109.66   34.10
  -1  -1  -6  105.76   23.18
   1  -1   6  273.82   66.32
   1  -1   6  140.73   23.31
  -1  -1  -6  123.53   27.94
  -1   1  -7   63.74   23.36
   1   1   7  123.04   55.71
   1   1   7   85.67   22.08
   1  -1   7   62.02   38.61
  -1  -1  -7   92.01   25.24
  -1   1  -8  287.67   59.57
   1   1   8  268.84   68.21
  -1  -1  -8  327.96   54.26
   1  -1   8  355.73   72.68
  -1   1  -9 1408.58  118.98
   1   1   9 1390.21  177.20
  -1  -1  -9 1375.11  115.94
   1  -1   9 1326.41  135.05
  -1   1 -10   70.05   33.49
   1   1  10  175.20   73.21
  -1  -1 -10   52.10   22.10
   1  -1  10  171.76   70.79
  -1   1 -11   21.18   13.17
   1   1  11   71.86   51.45
   1  -1  11   43.02   39.60
   1   1  12  202.88   79.32
  -1  -1 -12   48.68   42.17
   1  -1  12  179.45   53.56
   1  -3 -12  229.43   69.29
  -1  -3  12  145.16   80.18
  -1   3  11   90.81   60.58
   1   3 -11    6.39   19.83
  -1  -3  11   21.78   29.87
   1  -3 -11    3.10   23.17
  -1   3  10 1829.31  320.18
   1  -3 -10 2423.37  258.60
  -1  -3  10 2910.67  309.41
   1   3  -9   24.28   21.22
  -1   3   9  -19.50   37.61
   1  -3  -9   15.75   18.94
  -1  -3   9   98.14   44.20
   1   3  -8 3170.00  287.54
   1   3  -8 3891.01  277.49
  -1   3   8 3527.83  264.82
   1  -3  -8 4001.63  287.66
  -1  -3   8 4025.89  301.36
   1   3  -7  983.26  139.76
  -1   3   7  707.65  151.78
  -1   3   7  973.84  146.67
   1  -3  -7  975.14  150.33
  -1  -3   7 1173.78  226.14
   1  -3  -7 1014.55  160.46
   1   3  -6 5094.61  168.70
   1   3  -6 4810.21  173.36
  -1   3   6 4587.11  156.42
  -1   3   6 4856.43  181.27
  -1  -3   6 4565.87  152.75
   1  -3  -6 4692.29  173.02
   1  -3  -6 4733.59  167.63
  -1  -3   6 4767.18  198.37
  -1   3   5  340.39   34.14
   1   3  -5  461.41   78.90
  -1   3   5  390.96   51.05
   1   3  -5  430.18   76.04
  -1  -3   5  397.22   74.74
  -1  -3   5  409.14   56.98
   1  -3  -5  428.10   44.06
   1  -3  -5  424.81   48.50
   1   3  -4 1591.45  104.08
   1   3  -4 1647.14  116.88
  -1   3   4 1545.89  104.16
  -1   3   4 1792.24  125.89
   1  -3  -4 1501.27  106.56
  -1  -3   4 1752.95  127.94
  -1  -3   4 1542.54  100.85
   1  -3  -4 1790.25  120.93
   1   3  -3  354.14   54.82
   1   3  -3  290.97   22.41
   1   3  -3  320.24   65.23
  -1   3   3  397.08   70.92
  -1   3   3  301.08   31.51
  -1  -3   3  418.52   82.22
   1  -3  -3  379.27   64.27
   1  -3  -3  306.87   55.86
   1   3  -2 6506.04  143.57
   1   3  -2 6316.37  143.89
   1   3  -2 6549.09  135.60
  -1   3   2 6170.80  133.16
   1  -3  -2 6622.86  144.55
   1  -3  -2 6571.80  163.95
  -1  -3   2 6513.34  149.17
   1  -3  -2 6773.85  144.72
   1   3  -1 1148.76   66.26
  -1   3   1 1194.36   83.54
   1   3  -1 1338.39   90.22
  -1  -3   1 1102.05   64.19
   1  -3  -1 1241.25   93.84
  -1   3  -1 1490.15   88.34
   1   3   1  992.53   60.19
   1   3   1 1126.30   68.07
  -1   3  -1 1111.92   71.46
   1  -3   1 1107.03   65.27
   1  -3   1 1202.96   76.08
  -1  -3  -1 1148.21   69.56
  -1  -3  -1 1174.01   70.34
  -1   3  -260055.38 3782.72
  -1   3  -256843.34 1158.12
   1   3   256002.28 1135.53
   1   3   256236.49 1142.64
   1  -3   257545.83 3624.66
   1  -3   251293.48 1048.94
  -1  -3  -259352.96 3739.81
  -1  -3  -260897.73 3837.80
  -1   3  -313359.16  276.90
   1   3   313191.88  278.85
   1   3   314873.61  326.66
  -1   3  -313110.12  291.02
  -1  -3  -313562.43  287.33
   1  -3   314048.46  307.49
   1  -3   313284.21  276.23
  -1  -3  -312458.81  266.68
  -1   3  -4 7006.31  135.57
  -1   3  -4 6947.31  154.18
   1   3   4 6827.17  138.37
   1   3   4 7230.81  159.07
   1  -3   4 6748.89  131.31
   1  -3   4 7158.39  162.51
  -1  -3  -4 6888.39  140.15
  -1  -3  -4 6237.69  133.67
  -1   3  -5 1884.46   65.85
  -1   3  -5 2066.48   86.47
   1   3   5 1938.33   70.65
   1   3   5 1954.32   82.23
   1  -3   5 1795.94   63.52
   1  -3   5 1816.28   85.91
  -1  -3  -5 2043.68   86.87
  -1  -3  -5 1864.06  149.83
  -1   3  -6 1604.27   62.49
   1   3   6 1563.46   70.60
  -1   3  -6 1376.92   88.09
   1   3   6 1514.25   84.97
  -1  -3  -6 1592.22   80.62
   1  -3   6 1707.05  121.69
   1  -3   6 1481.59   75.66
  -1  -3  -6 1576.88   97.26
  -1   3  -7   34.20   16.85
   1   3   7    8.00   14.15
   1   3   7   87.38   30.22
  -1  -3  -7   28.84   24.81
   1  -3   7  142.76   55.22
  -1   3  -8 3364.19  267.84
   1   3   8 3529.21  290.81
   1  -3   8 2790.51  222.90
   1  -3   8 3483.04  292.31
  -1  -3  -8 3415.80  273.66
  -1   3  -9  156.52   39.68
   1   3   9  139.65   52.73
  -1  -3  -9  185.30   58.56
   1  -3   9  156.95   73.12
   1   3  10 3077.20  323.66
  -1  -3 -10 3170.99  322.62
   1  -3  10 2966.62  315.91
   1   3  11   24.07   50.52
  -1  -3 -11   28.20   22.00
   1  -3  11   23.92   29.58
   1   3  12  184.28   76.33
   1  -3  12   94.04   83.26
  -1  -5  12   95.52   36.89
  -1   5  11  160.95   58.15
   1  -5 -11  315.20   45.21
  -1  -5  11   82.07   60.16
  -1   5  10   89.87   54.72
   1  -5 -10  193.39   45.03
  -1  -5  10  171.29   71.70
   1   5  -9  239.67   81.36
   1   5  -9  446.77   83.37
  -1   5   9  502.16  113.54
   1  -5  -9  641.66   97.09
  -1  -5   9  462.12  112.52
   1   5  -8  164.40   55.00
   1   5  -8  194.13   64.56
  -1   5   8  227.02   60.44
   1  -5  -8  297.87   67.14
  -1  -5   8  336.30   79.53
   1   5  -7  393.10  129.97
   1   5  -7  450.38   91.13
  -1   5   7  634.20  112.37
  -1   5   7  372.55   74.13
  -1  -5   7  573.83  101.91
   1  -5  -7  541.05   84.10
   1   5  -6  502.37   62.85
  -1   5   6  377.66   50.89
  -1   5   6  507.14   57.20
   1   5  -6  313.88   54.45
   1  -5  -6  481.53   59.01
  -1  -5   6  427.57   54.19
   1  -5  -6  323.06   63.29
   1   5  -5  636.39   59.68
  -1   5   5  726.33  122.04
  -1   5   5  649.46   98.10
   1   5  -5  566.55   60.04
  -1  -5   5  848.53   89.91
   1  -5  -5  565.26   56.45
   1  -5  -5  523.46   63.37
   1   5  -4   21.70   15.13
   1   5  -4   53.24   10.47
   1   5  -4   87.74   25.64
  -1   5   4   24.44   14.53
  -1   5   4   46.00   25.58
  -1  -5   4   38.84   25.68
   1  -5  -4   88.06   25.95
   1  -5  -4   40.39   16.58
   1   5  -3  -15.65   10.31
   1   5  -3   30.25    7.32
   1   5  -3   33.53   23.46
  -1   5   3   21.75   14.95
  -1   5   3   -4.08   14.35
  -1  -5   3   65.53   25.74
   1  -5  -3   28.70   23.23
   1  -5  -3   16.61   13.01
  -1   5   2 2715.95   63.60
   1   5  -2 2565.78   75.71
   1  -5  -2 2790.22   97.59
  -1  -5   2 2730.23  116.65
   1  -5  -2 2798.66   71.99
   1  -5  -2 2921.24   65.64
  -1   5   1  237.72   46.71
   1   5  -1  177.05   32.47
   1   5  -1  142.97   19.21
  -1  -5   1   97.20    8.62
   1  -5  -1  175.97   41.53
  -1   5   0 1457.49  102.07
  -1   5   0 1305.73   79.02
   1   5   0 1322.77   78.37
   1   5   0 1376.81   81.61
   1  -5   0 1195.01   76.75
   1  -5   0 1437.69   88.57
  -1  -5   0 1452.02   85.85
  -1  -5   0 1413.73   83.43
   1   5   1 8478.44  179.40
   1   5   1 8837.07  186.17
  -1   5  -1 8491.16  184.84
   1  -5   1 8887.24  186.22
   1  -5   1 8568.09  188.59
  -1  -5  -1 8531.03  181.42
  -1  -5  -1 8279.51  172.93
  -1   5  -231971.50  648.29
   1   5   233319.29  681.10
  -1   5  -235542.25  733.49
   1  -5   236209.32  733.36
  -1  -5  -234575.78  706.93
   1  -5   236302.28  749.59
  -1  -5  -233061.38  674.07
  -1   5  -3  646.75   43.28
   1   5   3  623.90   48.76
  -1   5  -3  604.75   48.75
   1   5   3  729.30   50.51
   1  -5   3  686.46   46.57
  -1  -5  -3  696.85   84.85
  -1  -5  -3  760.74   85.83
   1  -5   3  615.98   51.86
  -1   5  -4  204.00   28.77
   1   5   4  192.23   39.38
   1   5   4  161.96   27.85
  -1   5  -4  186.74   32.25
  -1  -5  -4  174.02   39.28
   1  -5   4  263.11   52.05
   1  -5   4  178.88   26.34
  -1  -5  -4  161.95   27.13
  -1   5  -5 1487.88   56.20
   1   5   5 1471.07   72.16
   1   5   5 1534.28   66.29
  -1   5  -5 1541.71   92.22
   1  -5   5 1425.63   53.86
   1  -5   5 1701.27   89.53
  -1  -5  -5 1608.45   73.89
  -1  -5  -5 1530.07   67.09
  -1   5  -6   12.99   10.93
   1   5   6   30.11   21.54
   1   5   6   31.96   20.08
  -1   5  -6   15.52   18.65
  -1  -5  -6   23.94   24.84
   1  -5   6   82.55   34.32
   1  -5   6   15.75   14.37
  -1  -5  -6   29.50   22.50
  -1   5  -7   27.05   14.63
   1   5   7   67.09   46.60
   1  -5   7   25.21   18.82
   1  -5   7   80.96   49.91
  -1  -5  -7   21.67   22.70
  -1  -5  -7    6.38   17.23
  -1   5  -8   84.93   35.09
   1   5   8   77.95   27.71
  -1  -5  -8  168.81   45.11
   1  -5   8  108.40   26.31
   1  -5   8  171.32   55.99
   1   5   9  173.93   56.28
  -1   5  -9  136.89   52.43
   1  -5   9  149.74   77.64
  -1  -5  -9  273.88   56.72
  -1   5 -10  155.95   41.22
   1   5  10  159.21   70.77
  -1  -5 -10  176.09   40.65
   1  -5  10  140.86   82.64
  -1  -5 -11   60.73   33.16
   1  -5  11  251.42   91.69
   1   5  12   68.45   56.68
   1  -5  12  196.76   73.86
  -1  -7  12  877.98  206.66
  -1   7  11  544.01  238.83
   1  -7 -11  438.40  187.27
  -1  -7  11  414.79  194.28
  -1   7  10  730.52  137.73
   1  -7 -10  850.51  140.24
  -1  -7  10 1071.38  135.80
   1   7  -9   31.18   25.68
   1   7  -9   32.25   16.23
  -1   7   9   71.03   33.61
   1  -7  -9   28.68   16.65
  -1  -7   9    5.63   46.34
   1   7  -8 1375.57  112.34
  -1   7   8 1346.09  127.04
   1  -7  -8 1299.87  189.47
  -1  -7   8 1193.42  202.05
   1   7  -7   76.79   33.11
   1   7  -7    4.83    4.99
   1  -7  -7   23.74   33.61
  -1  -7   7  -23.33   32.43
   1   7  -6 2632.37  184.22
   1   7  -6 3225.14  166.54
   1   7  -6 2993.56  171.20
  -1   7   6 2998.05  162.30
  -1   7   6 3508.25  192.33
  -1  -7   6 3400.62  201.15
   1  -7  -6 3016.44  163.54
   1  -7  -6 3084.92  166.70
   1   7  -5 1145.89  126.81
   1   7  -5 1275.20   48.62
   1   7  -5 1369.84   70.80
  -1   7   5 1224.71  160.18
  -1   7   5 1309.83   60.52
  -1  -7   5 1387.72  170.46
   1  -7  -5 1322.51   61.64
   1  -7  -5 1351.90  114.26
   1   7  -4 4433.43   96.48
   1   7  -4 4392.16   81.54
   1   7  -4 4432.91  113.39
  -1   7   4 4565.67  101.82
  -1   7   4 4362.54   98.41
  -1  -7   4 4424.41  117.78
   1  -7  -4 4307.16  100.33
   1  -7  -4 4670.03   99.13
   1   7  -3  164.59   26.35
  -1   7   3  212.15   35.43
  -1   7   3  142.33   23.51
  -1  -7   3  163.60   35.45
   1  -7  -3  143.37   27.30
   1  -7  -3   77.79   17.93
   1   7  -2  880.36   94.40
  -1   7   2  891.13   58.16
  -1  -7   2  992.71   81.31
   1  -7  -2  923.20   91.16
   1  -7  -2  685.83   48.53
   1  -7  -2 1047.24   61.94
   1   7  -1 6301.18  145.13
   1   7  -1 6355.14  132.53
  -1   7   1 6455.81  133.20
   1  -7  -1 5941.28  153.53
   1  -7  -1 6296.13  138.63
  -1  -7   1 6574.43  137.64
  -1   7   0 8663.63  223.43
  -1   7   0 8416.70  179.84
   1   7   0 8832.00  186.37
   1   7   0 8730.18  183.43
   1  -7   0 8794.52  189.10
   1  -7   0 9710.67  222.33
  -1  -7   0 8915.28  190.00
  -1   7  -1 7408.47  167.87
  -1   7  -1 7718.04  172.65
   1   7   1 7818.75  168.04
   1  -7   1 8070.25  181.43
  -1  -7  -1 7849.02  169.13
  -1  -7  -1 7962.08  168.55
  -1   7  -210562.12  236.81
   1   7   210476.97  224.97
   1  -7   210198.99  210.89
   1  -7   210436.36  235.12
  -1  -7  -210261.92  220.70
  -1  -7  -211221.07  236.35
  -1   7  -3  499.08   56.51
  -1   7  -3  477.95   47.52
   1   7   3  507.94   76.17
   1   7   3  478.63   62.92
  -1  -7  -3  421.78   35.75
   1  -7   3  433.52   31.11
   1  -7   3  541.50   54.97
  -1  -7  -3  539.05   43.71
  -1   7  -4 1492.36   50.42
  -1   7  -4 1182.99  107.43
   1   7   4 1635.97   65.06
   1   7   4 1733.88   74.71
  -1  -7  -4 1461.48   99.98
   1  -7   4 1634.24   78.43
   1  -7   4 1582.16   62.61
  -1  -7  -4 1733.74   66.16
  -1   7  -5 4595.96  151.46
   1   7   5 4381.51  168.15
  -1   7  -5 4100.56  162.76
   1  -7   5 4112.75  184.00
   1  -7   5 4194.73  141.20
  -1  -7  -5 4078.77  146.27
  -1  -7  -5 4811.09  166.27
  -1   7  -6   17.57    8.96
   1   7   6   60.74   44.08
   1   7   6   16.81   21.28
  -1  -7  -6   26.81   24.47
   1  -7   6   -2.38   34.20
   1  -7   6   27.82   11.06
  -1  -7  -6   13.24    8.94
  -1   7  -7  531.41   90.07
   1   7   7  326.35  104.84
   1  -7   7  431.13   73.45
   1  -7   7  546.42   81.52
  -1  -7  -7  461.13   57.53
  -1  -7  -7  360.53   80.57
  -1   7  -8  532.89   80.08
   1   7   8  558.75   93.54
  -1  -7  -8  562.94  118.83
   1  -7   8  318.04   78.00
   1  -7   8  358.09   75.91
  -1   7  -9 2151.22  198.69
   1   7   9 2353.73  240.84
  -1  -7  -9 2466.13  231.89
   1  -7   9 2156.68  257.70
   1   7  10  321.07   79.06
  -1  -7 -10   65.94   27.95
   1  -7  10   93.25   64.98
  -1  -7 -11   47.83   25.86
   1  -7  11   59.24   43.69
  -1   9  11  275.19   77.12
   1  -9 -11  154.44   94.92
  -1  -9  11  328.52  140.88
  -1   9  10  568.60  142.51
   1  -9 -10  551.86  152.50
  -1  -9  10  731.34  136.23
   1   9  -9 1016.55   82.86
  -1   9   9 1354.06   85.42
   1  -9  -9  880.49  199.06
  -1  -9   9 1070.02  138.13
   1   9  -8 3058.83  240.48
  -1   9   8 3211.29  330.78
   1  -9  -8 2931.76  239.42
  -1  -9   8 3293.15  276.43
   1  -9  -8 2936.12  238.87
   1   9  -7  135.43   38.79
  -1   9   7  154.44   38.09
   1  -9  -7  250.57   64.55
  -1  -9   7  124.27   46.98
   1  -9  -7   94.53   28.07
   1   9  -6 4454.44  226.39
  -1   9   6 4649.43  251.95
   1  -9  -6 4398.87  235.07
  -1  -9   6 4320.82  240.95
   1  -9  -6 4469.34  234.33
   1   9  -5  510.62   73.70
   1   9  -5  680.89   50.70
   1   9  -5  594.67   55.67
  -1   9   5  605.32   84.51
  -1   9   5  689.37   80.38
  -1  -9   5  777.50  125.55
   1  -9  -5  647.87   59.72
   1  -9  -5  765.39   55.01
   1   9  -4 7278.42  230.82
  -1   9   4 7153.66  216.72
  -1   9   4 7477.85  223.55
  -1  -9   4 7381.22  234.86
   1  -9  -4 7355.93  225.19
   1  -9  -4 6853.03  200.52
   1   9  -3 1194.00   89.10
  -1   9   3 1193.50   83.90
  -1   9   3 1223.79   82.83
  -1  -9   3  756.97  100.35
   1  -9  -3 1192.09   88.10
   1  -9  -3 1318.41   86.43
   1   9  -2   29.15   19.45
  -1   9   2   48.85   10.98
   1  -9  -2  133.92   39.96
  -1  -9   2  131.53   34.06
  -1  -9   2   47.86   10.38
   1  -9  -2  138.69   29.76
   1  -9  -2  117.32   17.48
   1   9  -1 3165.24   70.92
  -1   9   1 3013.15   82.84
   1   9  -1 3054.80   98.78
  -1   9   1 3098.86   68.20
  -1  -9   1 3129.72   69.78
   1  -9  -1 3150.87   78.75
   1  -9  -1 3227.03  158.80
  -1   9   021231.98  467.70
  -1   9   020834.83  432.24
   1   9   021137.91  434.37
   1   9   021071.82  432.59
  -1  -9   021518.41  441.83
   1  -9   022067.36  473.97
   1  -9   021409.15  444.58
  -1   9  -1  338.98   63.31
   1   9   1  227.71   29.60
  -1   9  -1  222.06   42.33
   1   9   1  212.16   27.41
   1  -9   1  269.65   44.95
  -1  -9  -1  253.81   27.02
  -1  -9  -1  285.28   43.36
   1  -9   1  324.36   52.72
  -1   9  -2 5839.59  151.02
   1   9   2 6260.53  142.59
  -1   9  -2 6111.32  148.08
   1   9   2 5728.68  128.38
   1  -9   2 5664.92  151.21
  -1  -9  -2 5865.49  127.86
  -1   9  -3  647.50   82.46
  -1   9  -3  640.72   95.11
   1   9   3  616.87   50.75
   1   9   3  653.45   51.59
   1  -9   3  674.31   50.76
   1  -9   3  809.95  145.76
  -1  -9  -3  548.92   47.07
  -1  -9  -3  710.81   51.60
   1   9   4 8880.21  267.13
   1   9   4 9676.76  288.37
   1  -9   4 9587.88  276.18
   1  -9   4 9956.48  307.72
  -1  -9  -4 9818.81  292.75
  -1  -9  -4 9353.82  276.00
   1   9   5  614.43   70.67
   1   9   5  531.87   57.96
  -1   9  -5  526.88   64.68
  -1  -9  -5  611.69  132.70
   1  -9   5  497.40   70.13
   1  -9   5  520.84   62.95
  -1   9  -6 2960.97  154.21
   1   9   6 2871.83  164.13
   1  -9   6 2716.95  144.12
   1  -9   6 2808.98  201.37
  -1  -9  -6 2988.38  166.52
  -1  -9  -6 3111.54  200.58
  -1   9  -7   50.76   41.16
   1   9   7   -0.29   28.64
  -1  -9  -7   23.73   24.61
   1  -9   7   56.11   58.01
  -1  -9  -7   80.46   34.88
   1   9   8  123.28   46.16
   1  -9   8  204.03   43.52
   1  -9   8  392.59   95.28
  -1  -9  -8  215.53   64.37
  -1   9  -9  677.15   96.18
   1   9   9  825.85  230.92
  -1  -9  -9  876.93  145.74
   1  -9   9 1131.00  121.28
  -1  -9 -10   75.01   35.42
   1  -9  10  137.03   61.77
   1   9  11  363.97  176.08
  -1  -9 -11  263.89  142.32
   1  -9  11  384.92  132.66
   1 -11 -11  133.15   32.52
  -1 -11  11  134.91   54.45
   1 -11 -10   69.20   24.35
  -1 -11  10   99.07   45.86
  -1  11   9  342.21   50.15
   1 -11  -9  242.87   62.51
  -1 -11   9  163.31   70.86
   1  11  -8 2194.43  146.96
  -1  11   8 2343.41  170.87
   1 -11  -8 2291.42  166.02
  -1 -11   8 2776.12  282.75
   1 -11  -8 2279.11  227.10
   1  11  -7  169.96   58.17
   1  11  -7  302.81   34.17
  -1  11   7  345.40   88.33
   1 -11  -7  358.39   70.37
  -1 -11   7  350.09   65.98
   1 -11  -7  297.87   58.04
   1  11  -6 2178.65  103.76
   1  11  -6 3230.76  149.28
  -1  11   6 2888.42  149.10
   1 -11  -6 2947.08  151.64
  -1 -11   6 3125.16  232.40
   1 -11  -6 2348.28  115.16
   1  11  -5  921.76   99.38
  -1  11   5  896.22  151.11
  -1  11   5 1145.39  112.28
  -1 -11   5  924.17  189.16
   1 -11  -5  980.77   99.24
   1 -11  -5  996.56   94.90
   1  11  -4   28.11   24.82
  -1  11   4   30.69   14.84
  -1  11   4   28.34   16.65
  -1 -11   4   47.68   37.27
   1 -11  -4    2.63   27.67
   1 -11  -4   21.34    9.48
  -1  11   3 1189.54   89.21
   1  11  -3 1104.08  170.58
   1 -11  -3  956.66   89.48
  -1 -11   3 1442.74  112.79
   1 -11  -3 1227.06   88.78
   1 -11  -3 1128.78   74.09
   1  11  -2  166.80   28.90
  -1  11   2   89.09   12.36
   1 -11  -2  126.02   41.68
   1 -11  -2  214.82   47.75
  -1 -11   2  112.47   19.66
  -1 -11   2  196.00   24.48
   1 -11  -2  144.96   23.26
   1  11  -1 2127.14  124.11
  -1  11   1 2267.61  135.00
   1  11  -1 2247.43  146.78
  -1  11   1 2200.74  128.15
  -1 -11   1 2226.63  130.15
   1 -11  -1 2334.69  139.81
   1 -11  -1 2153.82  154.75
  -1  11   0 1359.35   91.31
   1  11   0 1186.46   73.73
   1  11   0 1175.32   72.41
   1 -11   0 1410.67  131.79
   1 -11   0 1133.29   71.83
  -1 -11   0 1299.98   86.58
  -1  11  -110106.76  237.83
  -1  11  -110086.55  224.93
   1  11   1 9977.87  215.07
   1  11   110095.23  213.43
   1 -11   110096.18  228.18
   1 -11   110352.56  231.71
  -1 -11  -110693.20  229.61
  -1 -11  -110507.44  221.40
  -1  11  -2 9116.50  192.83
  -1  11  -2 8444.47  177.80
   1  11   2 8285.78  168.07
   1  11   2 8736.10  171.20
   1 -11   2 8414.34  159.41
   1 -11   2 8207.99  177.30
  -1 -11  -2 7916.09  157.21
  -1 -11  -2 8750.02  163.86
  -1  11  -315873.06  299.62
  -1  11  -316523.34  325.01
   1  11   315908.97  300.60
   1 -11   315840.92  282.59
   1 -11   315926.52  317.40
  -1 -11  -314559.60  276.47
  -1 -11  -314959.51  272.62
  -1  11  -4 5093.08  166.24
  -1  11  -4 5689.56  202.00
   1  11   4 5871.07  197.81
   1  11   4 5599.01  189.25
   1 -11   4 5686.46  180.66
   1 -11   4 6012.39  227.63
  -1 -11  -4 5813.37  207.12
  -1 -11  -4 6185.37  201.79
  -1  11  -5   46.91   15.44
   1  11   5   74.52   33.09
  -1 -11  -5   52.32   18.73
   1 -11   5  137.63   46.22
   1 -11   5  116.95   16.02
  -1 -11  -5   94.46   20.03
  -1  11  -6 3085.96  149.89
   1  11   6 2385.64  133.80
   1 -11   6 2216.48  106.62
   1 -11   6 2844.91  253.40
  -1 -11  -6 2666.69  139.26
  -1 -11  -6 2103.06  107.15
  -1  11  -7  231.92   49.77
   1  11   7  400.23   66.62
   1 -11   7  268.59   66.60
   1 -11   7  374.25   67.79
  -1 -11  -7  357.54   56.15
  -1 -11  -7  226.42   62.45
  -1  11  -8  365.68   69.22
   1  11   8  394.45   98.06
   1 -11   8  512.98   70.53
   1 -11   8  513.74  109.76
  -1 -11  -8  558.20   84.01
  -1  11  -9 1088.22   85.67
   1  11   9 1432.71  190.05
  -1 -11  -9 1439.49   99.83
   1 -11   9 1473.40  240.15
  -1 -11 -10  107.02   57.94
   1 -11  10   38.19   24.77
   1  11  11 1361.31  244.49
  -1 -11 -11 1246.27  217.04
   1 -13 -11  414.07  141.75
  -1 -13  11  744.34  178.21
   1 -13 -10 2627.62  249.33
  -1 -13  10 2475.34  383.40
  -1  13   9  131.46   39.65
   1 -13  -9   95.57   34.27
  -1 -13   9  193.00   67.50
  -1  13   8   24.18   24.51
   1 -13  -8   70.83   38.61
  -1 -13   8   23.93   28.51
   1 -13  -8   40.97   19.44
  -1  13   7 1745.82  316.77
   1 -13  -7 1399.72  157.18
  -1 -13   7 1754.59  384.03
   1 -13  -7 1272.16  163.97
  -1  13   6 1617.28  338.67
   1 -13  -6 1637.31  337.45
  -1 -13   6 1724.32  158.19
   1 -13  -6 1331.91  151.84
  -1  13   5 2120.32  118.41
   1 -13  -5 1949.56  113.73
  -1 -13   5 2069.26  273.62
   1 -13  -5 2238.71  118.41
   1  13  -4 6457.75  228.37
  -1  13   4 7292.42  237.21
  -1 -13   4 6544.89  262.51
   1 -13  -4 5724.89  228.14
   1 -13  -4 6834.04  231.19
   1 -13  -4 6505.04  206.22
  -1  13   3  898.35   86.15
   1  13  -3  753.01  109.40
   1 -13  -3  868.76  100.03
  -1 -13   3 1029.79  182.33
   1 -13  -3  954.44  148.85
   1 -13  -3  851.03   74.25
   1  13  -210304.43  215.51
  -1 -13   210476.36  188.85
   1 -13  -210474.10  205.01
  -1 -13   210732.66  209.46
   1  13  -1 4300.42   86.52
   1  13  -1 4187.00  111.83
  -1  13   1 4142.86   94.54
  -1  13   1 4196.35   87.27
  -1 -13   1 4317.22   87.90
   1 -13  -1 4086.12   91.43
   1 -13  -1 4581.27  134.60
   1  13   0  776.04   59.73
  -1  13   0  772.85   76.14
   1  13   0  678.64   49.74
   1 -13   0  885.77  117.48
  -1 -13   0  789.91   57.56
   1 -13   0  796.54   56.92
  -1  13  -1  747.90  115.01
  -1  13  -1  715.16   57.97
   1  13   1  751.45   86.59
   1  13   1  785.42   56.49
   1 -13   1  882.40  114.07
   1 -13   1  888.43   69.25
  -1 -13  -1  740.47   54.51
  -1 -13  -1  836.13   58.83
  -1  13  -2 3188.13  146.60
  -1  13  -2 2911.36   86.72
   1  13   2 2841.16  106.30
   1  13   2 3290.81   77.31
   1 -13   2 3141.35  102.14
  -1 -13  -2 2906.21   74.71
  -1 -13  -2 3026.26   66.81
  -1  13  -3   27.50   18.16
  -1  13  -3   42.09   36.04
   1  13   3    6.05   17.61
   1  13   3   13.98   12.79
   1 -13   3    4.25    2.43
   1 -13   3    7.34   27.20
  -1 -13  -3   54.91   30.97
  -1 -13  -3   20.95    8.12
  -1  13  -4 4849.52  163.09
  -1  13  -4 4530.19  170.94
   1  13   4 4300.28  149.98
   1  13   4 5063.50  174.15
   1 -13   4 4669.65  148.27
   1 -13   4 5441.91  201.64
  -1 -13  -4 4769.79  166.97
  -1 -13  -4 4421.19  145.81
  -1  13  -5 2338.62  160.12
   1  13   5 1565.47  150.46
   1 -13   5 1627.39   90.21
   1 -13   5 1852.52  126.48
  -1 -13  -5 1681.78  102.46
  -1 -13  -5 1898.77  139.90
  -1  13  -6 1142.46  131.11
   1  13   6 1131.70  148.77
   1 -13   6 1212.82  118.09
   1 -13   6 1234.56  232.98
  -1 -13  -6 1337.12  136.39
  -1 -13  -6  968.90  142.57
  -1  13  -7 2706.52  214.64
   1  13   7 2449.35  203.75
   1 -13   7 2404.32  189.36
   1 -13   7 2816.92  341.72
  -1 -13  -7 2386.04  209.11
  -1  13  -8    6.10    6.92
   1  13   8   24.49   46.51
  -1 -13  -8   46.20   30.03
   1 -13   8  147.97   58.08
  -1  13  -9   65.57   22.22
   1  13   9  245.18   71.26
  -1 -13  -9  175.87   38.22
   1 -13   9  261.97   80.45
   1  13  10 3049.91  217.63
  -1 -13 -10 2340.22  173.74
   1 -13  10 2707.28  208.89
   1  13  11   62.44   47.75
  -1 -13 -11  143.13   58.93
   1 -13  11  165.97   63.30
  -1 -15  11  123.80   65.08
  -1  15  10  287.23  105.35
   1 -15 -10  501.93   83.45
  -1 -15  10  486.63  152.86
  -1  15   9  347.71   62.49
   1 -15  -9  413.03  104.79
  -1 -15   9  495.80  145.45
  -1  15   8  803.82  194.05
   1 -15  -8  896.23  150.07
  -1 -15   8  928.69  130.63
  -1  15   7   39.57   28.56
   1 -15  -7   24.46   36.17
  -1 -15   7  149.13   47.13
   1 -15  -7   20.02   11.02
  -1  15   6 1398.59  141.24
   1 -15  -6 1743.54  154.07
  -1 -15   6 1909.82  328.64
   1 -15  -6 1526.14  162.26
  -1  15   5 3386.92  165.23
   1 -15  -5 3491.90  177.71
  -1 -15   5 3389.19  220.74
   1 -15  -5 3256.05  153.17
   1  15  -4  274.33   49.76
  -1  15   4  343.24   46.47
  -1 -15   4  459.26   80.70
   1 -15  -4  372.02   76.44
   1 -15  -4  445.82   83.09
   1 -15  -4  338.31   49.59
   1  15  -3  589.68  114.29
  -1  15   3  669.45   63.43
   1 -15  -3  828.60  129.58
   1 -15  -3  637.17  124.47
  -1 -15   3  681.16   43.93
   1 -15  -3  654.25   53.97
   1  15  -2 3751.90  135.62
  -1  15   2 3634.96  109.45
  -1 -15   2 3830.15  139.27
   1 -15  -2 3786.39  126.08
   1 -15  -2 3818.17  238.49
  -1 -15   2 3659.63  108.93
  -1  15   1 1656.45   55.30
  -1  15   1 1757.23   70.20
   1  15  -1 1685.29   75.83
   1  15  -1 1560.10   59.15
   1 -15  -1 2146.16  250.84
  -1 -15   1 1737.32   62.52
   1 -15  -1 1884.41   70.05
  -1 -15   1 1655.38   75.51
  -1  15   0  564.52   99.61
   1  15   0  587.12   54.41
   1  15   0  482.32   46.28
   1 -15   0  717.12  127.66
   1 -15   0  511.78   48.89
  -1 -15   0  521.77   58.87
  -1  15  -1 1711.34  100.87
   1  15   1 1772.05   65.29
   1  15   1 1785.28   63.45
   1 -15   1 1518.79   69.54
   1 -15   1 1664.42   64.67
  -1 -15  -1 1603.24   62.25
  -1  15  -2 8275.45  262.44
  -1  15  -2 8684.03  269.58
   1  15   2 8990.15  270.87
   1  15   2 9604.94  282.42
   1 -15   2 9011.07  302.86
  -1 -15  -2 8862.48  265.53
  -1 -15  -2 9043.33  262.63
  -1  15  -3  219.57   34.38
   1  15   3  161.98   25.56
   1  15   3  176.38   42.65
   1 -15   3  234.45   29.25
   1 -15   3  270.39   44.52
  -1 -15  -3  151.06   27.46
  -1 -15  -3  274.95   39.50
  -1  15  -4  128.73   30.57
  -1  15  -4   31.01   23.13
   1  15   4   77.51   23.81
   1 -15   4  167.49   47.26
   1 -15   4  114.29   14.07
  -1 -15  -4  172.95   42.24
  -1 -15  -4   60.56   11.87
  -1  15  -5  233.69   39.00
   1  15   5  245.30   51.01
  -1 -15  -5  218.17   43.36
   1 -15   5  480.52   87.31
   1 -15   5  269.50   43.04
  -1 -15  -5  213.60   41.92
  -1  15  -6 1513.96  162.67
   1  15   6 1672.57  303.58
   1 -15   6 1583.05  169.15
   1 -15   6 1660.79  377.95
  -1 -15  -6 1730.79  315.37
  -1 -15  -6 1690.11  319.31
  -1  15  -7  597.01  113.70
   1  15   7  638.54  122.48
   1 -15   7  698.89   92.11
   1 -15   7  696.37  193.69
  -1 -15  -7  773.50  121.91
  -1 -15  -7  461.37   79.07
  -1  15  -8  236.66   65.96
   1  15   8  557.88   65.62
  -1 -15  -8  553.29  130.71
   1 -15   8  643.40   89.36
   1  15   9  419.56   64.32
  -1 -15  -9  374.91  109.80
   1  15  10  143.67   67.19
  -1 -15 -10  124.89   41.91
   1 -15  10  204.54   70.36
  -1 -15 -11  247.48   91.02
   1 -15  11  427.09  131.61
   1 -17 -11  -21.66   39.26
  -1 -17  11   54.26   29.68
   1 -17 -10   69.86   50.29
  -1 -17  10  146.96   57.09
  -1  17   9   20.73   13.79
   1 -17  -9  135.30   51.75
  -1 -17   9   96.94   53.48
   1 -17  -8  851.17  102.94
  -1 -17   8  749.89  138.08
  -1  17   7  174.41   47.00
   1 -17  -7  205.33   86.58
  -1 -17   7  228.14   76.44
   1 -17  -7  109.55   26.94
  -1  17   6  828.23  126.62
   1 -17  -6  804.60   97.34
  -1 -17   6  907.94  143.12
   1 -17  -6  730.09  100.20
  -1  17   5  101.81   30.23
   1 -17  -5  133.00   39.58
  -1 -17   5  185.99   64.70
   1 -17  -5   94.97   22.85
  -1  17   4 1221.95   91.77
   1 -17  -4 1139.04   78.50
  -1 -17   4 1296.79  201.66
   1 -17  -4 1308.34   71.14
   1  17  -3 1177.43  234.48
  -1  17   3 1204.28  113.29
   1 -17  -3 1101.19  163.44
   1 -17  -3 1180.00  116.80
  -1 -17   3  850.90   79.34
  -1 -17   3 1260.08  117.54
   1  17  -2  258.64   36.25
  -1  17   2  188.40   26.97
   1 -17  -2  136.27   28.42
   1 -17  -2  226.13   28.69
  -1 -17   2  242.01   37.92
  -1 -17   2  259.66   20.95
   1  17  -1 1888.97   73.46
  -1  17   1 1740.95  119.45
   1  17  -1 2065.95   98.68
  -1  17   1 1863.91   66.72
  -1 -17   1 1639.70   84.45
  -1 -17   1 1929.32   84.85
   1 -17  -1 1881.39   75.51
   1 -17  -1 2008.75  264.08
   1  17   0  686.41   62.78
  -1  17   0  738.65   81.72
   1  17   0  635.11  101.30
   1 -17   0  907.10  125.75
  -1 -17   0  633.54   62.54
   1 -17   0  687.62   63.25
  -1  17  -1  136.46   31.40
   1  17   1  169.88   35.16
   1  17   1  164.54   22.11
   1 -17   1  202.03   52.00
   1 -17   1  301.63   49.69
  -1 -17  -1  346.24   57.42
   1  17   2  264.07   47.28
   1  17   2  243.76   29.65
  -1  17  -2  226.79   60.88
  -1 -17  -2  290.42   34.05
   1 -17   2  209.93   35.43
   1 -17   2  411.56   77.00
   1 -17   2  205.20   20.18
  -1 -17  -2  254.70   42.14
   1  17   3 1632.06   66.06
   1  17   3 1581.90   69.17
  -1  17  -3 1722.29   99.19
  -1 -17  -3 1662.59   73.21
   1 -17   3 1859.40   87.18
   1 -17   3 1656.30  238.58
   1 -17   3 1629.88   64.99
  -1 -17  -3 1681.00   73.12
  -1  17  -4  934.54  102.13
   1  17   4 1245.08  113.08
  -1 -17  -4 1142.25   80.55
   1 -17   4 1242.72  177.51
   1 -17   4 1108.42   67.52
  -1 -17  -4 1033.80   66.09
  -1  17  -5  246.78   56.83
   1  17   5  362.01   60.43
  -1 -17  -5  431.80   57.33
   1 -17   5  275.56   76.30
  -1  17  -6  914.77  157.06
   1  17   6 1417.95  170.98
   1 -17   6 1139.05  159.94
   1 -17   6 1558.00  208.33
  -1 -17  -6 1176.44  201.58
  -1 -17  -6  896.99  159.18
   1  17   7   31.97   26.49
  -1 -17  -7  107.90   52.52
   1 -17   7   92.54   74.81
  -1 -17  -7   36.19   17.37
   1  17   8  141.65   52.26
  -1 -17  -8   64.20   24.54
   1 -17   8  107.84   61.43
   1  17   9  646.07  141.31
  -1 -17  -9  497.71  110.51
   1 -17   9  650.29  162.11
  -1 -17 -10  392.67  100.56
   1 -17  10   71.51   64.14
   1 -19 -10  125.26   89.31
  -1 -19  10  202.29   86.01
   1 -19  -9 2242.79  254.39
  -1 -19   9 1865.39  340.70
  -1  19   8 1001.28  167.00
   1 -19  -8 1122.85  189.51
  -1 -19   8 1432.13  166.64
   1 -19  -7 1137.37  146.34
  -1 -19   7 1022.58  198.98
  -1  19   6 1888.09  218.43
   1 -19  -6 1854.49  181.77
  -1 -19   6 1740.77  235.75
   1 -19  -6 1780.20  142.14
  -1  19   5   89.00   30.64
   1 -19  -5  299.16   46.60
  -1 -19   5  222.86   61.37
   1 -19  -5  230.66   53.52
  -1  19   4 2330.76  143.97
   1 -19  -4 2290.77  122.23
   1 -19  -4 2225.33  106.61
  -1  19   3 6927.62  353.19
  -1 -19   3 6910.48  349.07
   1 -19  -3 6602.02  345.48
  -1 -19   3 8106.32  413.90
  -1  19   2  270.21   40.94
   1  19  -2  260.57   57.84
  -1  19   2  216.40   45.97
  -1 -19   2  352.30   59.14
   1 -19  -2  390.78   59.07
  -1 -19   2  374.60   38.86
   1 -19  -2  395.55   52.44
   1  19  -1 4517.61  157.58
  -1  19   1 4402.44  153.53
   1  19  -1 4174.26  157.71
  -1  19   1 4410.15  145.82
   1 -19  -1 4864.96  440.46
  -1 -19   1 3824.26  129.10
   1 -19  -1 4506.98  156.57
  -1 -19   1 4119.15  220.52
   1  19   0 9964.38  319.72
  -1  19   0 9513.82  314.54
   1  19   0 9521.49  316.80
  -1  19   0 9848.00  315.00
  -1 -19   0 9730.16  339.18
  -1 -19   010151.58  329.73
   1 -19   0 9920.95  321.29
   1 -19   0 9875.90  344.22
   1  19   1    0.69   16.37
  -1  19  -1   33.37   16.71
   1  19   1   18.68   12.66
   1 -19   1   41.92   28.32
  -1 -19  -1   46.54   20.15
   1 -19   1    7.32   14.53
   1  19   2 5005.46  172.58
  -1  19  -2 4996.80  182.67
   1  19   2 6118.45  208.97
   1 -19   2 5824.10  202.62
  -1 -19  -2 5333.05  182.68
   1 -19   2 5601.86  183.31
  -1  19  -3 2484.96  187.05
   1  19   3 2608.22  141.52
   1 -19   3 2983.30  157.22
   1 -19   3 2497.97  224.31
  -1 -19  -3 2622.85  150.12
   1 -19   3 2474.92  129.12
  -1 -19  -3 2657.72  140.35
   1  19   4 1757.88  149.88
   1 -19   4 1470.65   88.17
   1 -19   4 1428.26   70.73
   1 -19   4 1667.69  243.11
  -1 -19  -4 1503.45   88.71
  -1 -19  -4 1463.14  143.51
   1  19   5 3567.45  258.63
  -1 -19  -5 3804.08  279.78
   1 -19   5 4176.35  359.01
   1 -19   5 3552.67  248.51
  -1 -19  -5 3569.30  255.85
   1  19   6 2600.49  202.90
  -1 -19  -6 2074.45  154.14
   1 -19   6 2791.63  398.73
   1  19   7  102.19   28.88
  -1 -19  -7    4.09   41.99
   1 -19   7   82.89   36.06
   1  19   8 2080.61  262.96
  -1 -19  -8 2421.60  252.79
   1 -19   8 2100.06  349.56
  -1 -19  -9 1617.27  142.86
   1 -19   9 1800.45  249.83
  -1 -19 -10 1165.45  263.75
   1 -19  10  971.95  279.95
   1 -21 -10   64.37   42.44
  -1 -21  10  123.00   46.23
   1 -21  -9  601.23  211.78
  -1 -21   9  749.87  221.69
   1 -21  -8  260.63   49.87
  -1 -21   8  501.75  106.19
  -1  21   7  608.36   62.55
   1 -21  -7  613.89   71.86
  -1 -21   7  303.52   85.42
  -1  21   6  733.47  124.29
   1 -21  -6  839.81  199.98
   1 -21  -5  125.20   39.94
   1 -21  -5   69.80   19.96
  -1  21   4 1134.92  132.02
   1 -21  -4 1030.33  114.57
  -1  21   3 1383.40   92.75
  -1 -21   3 1289.87  225.75
   1 -21  -3 1278.99  230.27
  -1 -21   3 1260.38  237.66
  -1  21   2   53.61   16.20
   1  21  -2   45.34   14.70
  -1  21   2   98.26   24.78
   1 -21  -2   55.77   22.70
  -1 -21   2  153.10   41.88
  -1 -21   2  124.41   27.83
   1 -21  -2   99.11   27.30
   1  21  -1  566.29  102.63
  -1  21   1  479.04   66.20
   1  21  -1  527.65   85.04
  -1  21   1  671.49   64.60
   1 -21  -1  684.14  108.72
  -1 -21   1  666.33   43.95
   1 -21  -1  706.61   88.94
  -1 -21   1  657.39   92.00
  -1  21   0 2339.23  125.43
   1  21   0 2299.37  132.57
  -1  21   0 2466.05  139.64
   1  21   0 2531.80  137.29
  -1 -21   0 2360.70  314.69
  -1 -21   0 2500.60  141.69
   1 -21   0 2761.83  149.74
   1 -21   0 2452.94  155.19
   1  21   1   84.75   20.50
  -1  21  -1  141.73   28.59
   1  21   1   72.69   20.34
   1 -21   1  216.89   38.67
  -1 -21  -1  167.67   29.37
   1 -21   1  175.26   37.57
   1  21   2   42.84   29.67
  -1  21  -2   67.43   25.58
   1  21   2   65.65   20.74
   1 -21   2   31.41   19.06
  -1 -21  -2   53.77   34.87
   1 -21   2    7.53    9.64
   1  21   3 1154.63  141.37
   1 -21   3  781.37  105.70
   1 -21   3  999.61  107.65
   1 -21   3 1003.68  162.27
  -1 -21  -3 1055.94  113.40
  -1 -21  -3 1045.54  128.82
   1  21   4   15.96   15.64
   1 -21   4   -0.04    4.21
   1 -21   4   13.55    4.90
   1 -21   4  120.14   45.02
  -1 -21  -4    3.92   29.09
  -1 -21  -4   16.28   16.03
   1  21   5   22.29   23.51
  -1 -21  -5   31.46   40.00
   1 -21   5   78.87   44.57
   1  21   6 2732.52  233.09
  -1 -21  -6 2795.89  226.89
   1 -21   6 3576.11  360.90
  -1 -21  -6 2635.65  205.06
   1  21   7  639.49   56.47
  -1 -21  -7  354.02  150.79
   1 -21   7  478.39   77.95
  -1 -21  -8  106.55   62.98
   1 -21   8   58.66   50.55
   1  21   9  315.16   67.24
  -1 -21  -9  297.26   74.70
   1 -21   9  203.52   63.60
  -1 -21 -10  134.46   43.93
   1 -21  10   19.40   41.45
   1 -23 -10  102.25   43.77
   1 -23  -9  734.16  275.36
   1 -23  -8  359.30   80.99
   1 -23  -7   50.30   33.94
  -1  23   6  -10.65   12.86
   1 -23  -6   42.44   35.48
  -1  23   5 1476.71  135.03
   1 -23  -5 1569.37  236.24
  -1  23   4   52.47   18.82
   1 -23  -4  123.08   49.40
  -1  23   3 3970.42  288.95
  -1  23   3 4549.16  322.10
   1 -23  -3 4633.41  336.20
  -1 -23   3 4758.09  351.62
  -1 -23   3 4527.17  318.05
  -1  23   2   53.13   16.29
   1  23  -2   50.44   22.94
  -1  23   2   56.44   20.71
  -1 -23   2   23.25   14.31
   1 -23  -2  129.11   46.89
   1  23  -1 1306.65  252.66
  -1  23   1 1938.96   97.06
   1  23  -1 2094.71  108.13
   1 -23  -1 1708.77  218.80
  -1 -23   1 2116.12  106.44
   1 -23  -1 2216.08  116.38
  -1  23   0  889.97  126.89
   1  23   0  519.93  152.97
  -1  23   0  816.42  122.24
   1  23   0 1068.82  152.38
   1 -23   0  910.24  141.04
  -1 -23   0  940.83  134.69
   1 -23   0  961.10  137.61
  -1 -23   0  701.25  127.55
   1  23   1 2043.83  199.77
  -1  23  -1 2351.24  147.87
   1  23   1 2576.11  152.18
   1 -23   1 2316.28  208.02
  -1 -23  -1 2437.47  150.71
   1 -23   1 2677.05  158.54
   1  23   2   18.76   17.82
  -1 -23  -2   95.27   42.44
   1 -23   2   20.90   10.77
   1 -23   2   32.60   13.47
   1  23   3 2852.08  208.30
  -1 -23  -3 2961.96  218.37
   1 -23   3 2779.29  198.20
   1 -23   3 2457.01  183.02
   1  23   4   44.04   17.57
   1 -23   4   45.66   14.85
   1 -23   4    7.90   22.00
  -1 -23  -4   52.92   29.85
  -1 -23  -4   22.93   10.77
   1  23   5  536.67   82.73
  -1 -23  -5  488.56   90.33
   1 -23   5  608.80  139.25
  -1 -23  -5  293.65   68.16
   1  23   6   11.10   17.17
  -1 -23  -6   52.82   30.20
   1 -23   6   95.67   41.78
  -1 -23  -7  537.64   66.48
   1 -23   7  323.37   76.27
  -1 -23  -8  140.52   60.13
   1 -23   8   33.61   57.52
  -1 -23  -9  317.79   77.53
   1 -23   9  253.24   79.35
   1 -25  -9  115.31   67.55
   1 -25  -8   98.36   57.97
   1 -25  -7  937.18  253.34
  -1  25   6 3539.54  212.30
   1 -25  -6 3669.08  239.34
  -1  25   5  430.04   78.07
   1 -25  -5  620.24   95.92
  -1  25   4  768.86  145.43
   1 -25  -4  806.45  115.21
  -1  25   3   -4.78    9.86
  -1 -25   3   67.78   18.74
   1 -25  -3   44.89   32.44
  -1 -25   3   13.38   12.83
  -1  25   2  660.50  159.52
  -1  25   2 1197.61  135.24
   1  25  -2 1296.12  144.08
  -1 -25   2  927.43  165.56
  -1 -25   2 1247.13  156.47
   1 -25  -2 1283.11  152.77
  -1  25   1 2189.21  207.86
  -1  25   1 2458.55  177.44
   1  25  -1 2640.00  192.83
  -1 -25   1 2474.61  278.73
  -1 -25   1 2619.60  190.01
   1 -25  -1 2630.00  194.86
  -1  25   0 2705.70  195.82
  -1  25   0 2638.45  214.66
   1  25   0 2676.94  194.48
   1 -25   0 2921.67  234.13
  -1 -25   0 1950.77  307.12
  -1 -25   0 2941.30  214.07
   1 -25   0 2781.91  203.17
  -1  25  -1 4484.60  330.08
   1  25   1 4894.09  348.45
  -1  25  -1 5359.85  379.96
   1 -25   1 3988.55  296.43
  -1 -25  -1 5581.27  397.52
   1 -25   1 5592.24  397.12
   1  25   2 2990.73  215.84
  -1 -25  -2 3170.17  231.68
   1 -25   2 3554.71  254.47
   1 -25   2 3124.43  234.94
   1  25   3  306.20   61.92
  -1 -25  -3  485.42   77.42
   1 -25   3  489.69   72.87
   1  25   4  108.57   35.22
  -1 -25  -4  218.80   48.66
   1 -25   4  251.31   68.64
   1 -25   4  144.79   39.45
   1  25   5  124.93   35.37
  -1 -25  -5   57.89   22.29
   1 -25   5  222.88   49.60
  -1 -25  -6 2104.42  143.17
   1 -25   6 1402.38  328.81
   1  25   7  991.86  226.80
  -1 -25  -7  963.46  201.70
   1 -25   7  872.61  270.78
  -1 -25  -8 1488.97  149.88
   1 -25   8 1115.28  362.75
  -1 -25  -9   84.19   44.32
   1 -27  -9  115.05   51.75
   1 -27  -8   78.47   43.69
   1 -27  -7  191.49   57.26
  -1  27   5  148.92   43.81
   1 -27  -5  274.17   79.92
  -1  27   4  140.54   33.69
   1 -27  -4  268.38   63.09
  -1  27   3 1311.33  146.35
   1  27  -3 1148.61  105.75
  -1  27   3  573.76  149.86
  -1 -27   3 1591.43  136.55
   1 -27  -3 1429.62  130.74
  -1  27   2  254.87   69.71
  -1  27   2  536.29   74.71
   1  27  -2  509.01  111.63
  -1 -27   2  272.23   80.51
  -1 -27   2  540.98   86.43
   1 -27  -2  641.09   94.43
   1  27  -1 2580.93  209.07
  -1  27   1 2234.41  179.92
   1 -27  -1 2396.95  200.90
  -1 -27   1 2449.74  197.49
   1  27   0  234.78   73.48
  -1  27   0  213.15   51.26
  -1  27   0  157.06   42.72
  -1 -27   0  319.05   75.01
   1 -27   0  328.88   63.29
  -1  27  -1  650.20  128.76
   1  27   1  523.44  104.89
   1 -27   1  676.35  122.60
  -1 -27  -1  641.95   98.12
   1  27   2  179.42   44.72
   1  27   2   81.28   29.94
   1 -27   2  239.57   62.63
  -1 -27  -2  142.27   35.51
   1  27   3   54.48   18.12
  -1 -27  -3  110.21   37.31
   1 -27   3   69.61   21.86
   1 -27   3    4.09    9.14
   1  27   4   69.46   20.19
   1 -27   4   76.25   20.72
  -1 -27  -4  123.98   44.58
  -1 -27  -5  867.30  119.44
   1  27   6  624.19  144.15
  -1 -27  -6  904.13  217.40
  -1 -27  -7  224.43  142.61
   1 -27   7  415.02  164.87
  -1 -27  -8  105.74   44.51
   1 -27   8  188.62   40.31
   1 -29  -8   96.89   45.35
   1 -29  -7  321.60   73.14
   1 -29  -6  128.46   41.63
   1 -29  -5  942.18  109.80
  -1  29   4    6.27   12.13
   1 -29  -4   69.10   33.89
   1  29  -3  115.45   25.74
  -1  29   3  128.44   27.68
   1 -29  -3  232.98   46.02
  -1 -29   3   76.77   23.73
  -1  29   2   43.57   17.24
   1  29  -2   68.62   32.28
  -1  29   2   -1.99    9.63
   1 -29  -2   58.08   29.07
  -1 -29   2   48.86   24.07
  -1  29   1   20.10   17.18
   1  29  -1   75.05   34.82
  -1  29   1   21.80   10.19
  -1 -29   1   24.52   14.31
   1 -29  -1   49.46   26.12
  -1  29   0  739.55  100.46
   1  29   0  862.67  137.56
   1 -29   0  975.17   54.62
  -1 -29   0 1055.60  149.70
  -1  29  -1 2275.41  188.99
   1  29   1 2286.35  180.08
   1 -29   1 2465.14  194.74
  -1 -29  -1 2483.10  199.55
   1  29   2   31.99   18.50
  -1  29  -2  148.43   41.77
   1 -29   2  168.95   42.11
   1  29   3  338.06   75.15
  -1 -29  -3  473.79   76.90
   1 -29   3  304.17   81.56
   1  29   4   31.31   13.16
  -1 -29  -4   78.40   31.25
   1  29   5  181.22   45.00
  -1 -29  -5  186.07   62.52
   1  29   6    2.23   17.60
  -1 -29  -6   37.30   18.58
  -1 -29  -7  432.89  102.93
  -1 -29  -8  103.69   60.64
   1 -31  -7  124.23   60.84
   1 -31  -6   39.90   38.28
   1 -31  -5  452.68  155.48
   1  31  -4 1547.95  167.36
   1 -31  -4 1515.05  182.56
  -1  31   3  102.40   18.75
   1  31  -3  203.54   40.48
   1 -31  -3  171.70   47.44
   1  31  -2 1522.79  150.59
  -1 -31   2 1773.04  111.66
   1 -31  -2 2006.73  132.54
  -1  31   1  459.16   75.59
   1  31  -1  432.77   87.18
  -1 -31   1  565.61   41.58
   1  31   0  146.24   31.88
  -1 -31   0  144.65   37.16
   1 -31   0  269.85   50.55
  -1  31  -1  323.33   65.68
   1  31   1  277.60   70.56
   1 -31   1  461.73   39.62
  -1 -31  -1  471.33  101.57
   1 -31   2   14.47   17.00
  -1 -31  -2   14.82   21.14
   1  31   3 1463.28  201.37
   1 -31   3 1763.86  179.44
  -1 -31  -3 1710.31  183.67
   1  31   4 1041.89  196.31
  -1 -31  -4 1484.47  162.47
   1  31   5  504.69  111.75
  -1 -31  -5  597.91  217.99
  -1 -31  -6  324.91  162.11
  -1 -31  -7   61.44   34.89
   1 -33  -6   19.05   45.26
   1  33  -5   71.53   31.11
   1 -33  -5   67.57   37.93
   1  33  -4   41.09   28.47
   1 -33  -4   87.76   51.69
   1  33  -3 1865.31  197.09
   1 -33  -3 2082.77  199.44
   1  33  -2  108.40   38.69
  -1  33   2   59.58   20.63
   1 -33  -2  181.85   44.11
  -1 -33   2   99.43   43.80
   1  33  -1  137.92   40.52
  -1  33   1  133.66   30.82
   1 -33  -1  162.08   42.12
  -1  33   0   33.96   15.99
   1  33   0   34.84   12.39
   1 -33   0   30.94   24.16
  -1 -33   0   14.56   13.98
  -1  33  -1   22.75   16.43
   1  33   1   64.97   23.00
  -1 -33  -1   14.32   23.10
   1 -33   1   11.74   11.21
  -1 -33  -2   16.37   26.15
   1 -33   2   70.37   24.73
  -1  33  -3 4593.28  416.08
  -1 -33  -3 4746.69  431.59
   1  33   4  259.11   38.76
  -1 -33  -4  208.89   62.17
  -1 -33  -5  192.28   52.24
   1  35  -5  460.30  118.63
   1 -35  -5  510.60  125.58
   1  35  -4   44.49   31.49
   1 -35  -4   77.50   39.76
   1  35  -3  645.89  211.40
   1 -35  -3 1021.64  101.81
   1  35  -2 2376.12  163.63
   1 -35  -2 2576.81  177.26
   1  35  -1  676.72  116.59
  -1  35   1  510.50  104.06
   1 -35  -1  921.34  128.27
   1  35   0  407.56   86.14
  -1  35   0  451.40   96.84
   1 -35   0  344.42  118.77
  -1 -35   0  586.94  129.30
  -1  35  -1  411.78   58.53
   1 -35   1  582.83   85.89
  -1 -35  -1  450.82  135.99
   1  35   2  114.25   41.26
  -1  35  -2  145.14   55.14
  -1  35  -3 1101.29  185.05
  -1  35  -4  743.28  140.28
  -1 -35  -4  418.96  214.48
  -1 -35  -5 1352.16  233.61
   1  37  -4   36.68   24.40
   1 -37  -4   80.45   50.91
   1  37  -3  314.62  126.49
   1 -37  -3  508.91  106.00
   1  37  -2   61.06   18.93
   1 -37  -2    9.30   33.02
  -1  37   0  145.92   61.86
   1  37   0  230.94   65.80
  -1  37  -1   79.47   22.26
  -1 -37  -1  117.09   41.26
  -1  37  -2   61.45   28.78
  -1 -37  -2   29.59   33.76
  -1 -37  -3 1423.67  245.50
  -1  37  -4  317.44   84.27
   1  39  -1   26.10   21.04
  -1 -39  -1  102.18   35.56
  -1  39  -2  100.12   33.36
  -2   0  12   12.15   34.69
   2   0 -11   25.07   21.62
  -2   0  11   67.14   38.36
   2   0 -10  269.90   86.93
  -2   0  10  197.07   50.91
   2   0  -9   14.88   18.80
  -2   0   9   76.69   56.36
   2   0  -8  312.41   85.09
   2   0  -8  524.08   66.61
  -2   0   8  544.95   80.83
   2   0  -7   56.98   28.15
  -2   0   7   57.83   29.64
   2   0  -6  109.06   39.37
   2   0  -6   44.37   11.12
  -2   0   6   42.23   24.19
   2   0  -6   25.29   12.08
   2   0  -5    8.91   17.01
   2   0  -5   89.43   25.01
  -2   0   5   69.90   27.49
   2   0  -4 3193.13   94.12
   2   0  -4 3435.73   75.37
  -2   0   4 3324.23  109.62
   2   0  -4 3463.82   94.22
   2   0  -3   29.76   19.40
   2   0  -3   21.24   13.39
  -2   0   3   27.74   16.05
   2   0  -3   32.57   14.41
  -2   0   269433.25 4379.25
   2   0  -259174.28 3730.86
   2   0  -270522.87 4443.64
  -2   0   1   56.12   24.97
   2   0  -1   24.57   11.10
   2   0  -1   -6.38    6.80
  -2   0   1   12.23    7.25
   2   0   012472.32  256.86
  -2   0   014147.11  291.16
   2   0   012895.77  265.51
  -2   0  -1    2.88   15.06
   2   0   1   12.47    8.96
  -2   0  -1   55.97   21.00
   2   0   1   14.38   13.51
   2   0   211397.54  238.61
  -2   0  -211787.23  247.38
   2   0   211887.68  260.40
  -2   0  -211172.79  239.77
  -2   0  -3   -7.39   14.00
   2   0   3   14.11   11.79
   2   0   3   29.38   22.21
  -2   0  -3   69.88   36.51
  -2   0  -4 3234.89   75.06
   2   0   4 3228.47   77.13
   2   0   4 3347.83   93.80
  -2   0  -4 2995.53   83.12
  -2   0  -5   35.76   18.62
   2   0   5   16.93   17.23
   2   0   5    9.63   32.70
  -2   0  -5   23.74   21.55
  -2   0  -6 4867.52  253.22
   2   0   6 5093.41  264.69
   2   0   6 5220.85  285.21
  -2   0  -6 4508.56  242.27
  -2   0  -7    1.60   17.49
   2   0   7   46.60   21.02
   2   0   7   60.85   36.05
  -2   0  -8   26.28   19.60
   2   0   8   85.79   44.04
  -2   0  -9    1.01   16.08
   2   0   9   54.33   36.37
  -2   0 -10  239.57   74.67
   2   0  10  317.23  107.18
  -2   0 -11   46.54   24.80
  -2   2  12  190.13   91.69
   2  -2 -12  188.17   59.02
  -2  -2  12  204.77   64.41
  -2   2  11  321.76   73.23
  -2   2  10  401.58   98.06
   2  -2 -10  363.70   62.59
  -2  -2  10  631.58   84.63
   2   2  -9  393.84  126.30
  -2   2   9  674.73  104.00
   2  -2  -9  510.64  138.14
  -2  -2   9  527.82  100.72
   2   2  -8 3382.19  264.81
   2   2  -8 3874.85  276.71
  -2   2   8 3916.93  288.90
   2  -2  -8 3879.68  279.66
  -2  -2   8 4105.78  304.31
   2   2  -7  476.95  106.16
  -2   2   7  573.57   91.48
   2   2  -7  602.57   88.26
   2   2  -7  385.51  124.05
   2  -2  -7  618.82   98.21
   2  -2  -7  348.48  133.64
  -2  -2   7  525.23   84.59
   2  -2  -7  361.08  117.87
   2   2  -6  813.67  144.97
  -2   2   6 1111.90  183.62
   2   2  -6  911.62  122.88
   2   2  -6  756.34  167.15
   2  -2  -6  870.95  138.10
  -2  -2   6  819.64   88.31
   2  -2  -6  886.09   90.05
   2  -2  -6  690.24   87.51
   2   2  -5 2687.91  146.12
  -2   2   5 2856.90  101.96
   2   2  -5 3086.45   98.75
   2   2  -5 2842.06  117.85
   2  -2  -5 2829.57  120.15
  -2  -2   5 2864.94  105.40
   2  -2  -5 3037.79  102.93
   2  -2  -5 3073.31  104.94
   2   2  -4 1046.38  106.93
  -2   2   4  829.56   61.69
   2   2  -4  847.49   64.49
   2   2  -4  992.11   77.11
   2  -2  -4  992.72   96.75
  -2  -2   4  813.03  103.03
   2  -2  -4  975.43  101.04
   2  -2  -4 1114.90  191.68
   2   2  -3 2090.73  134.53
   2   2  -3 1664.60  102.78
  -2   2   3 1680.10  102.25
   2   2  -3 1661.09   98.01
   2  -2  -3 1620.12  110.02
   2  -2  -3 1795.96  108.22
   2  -2  -3 1757.77  106.67
  -2  -2   3 1835.93  115.58
  -2   2   212407.29  288.31
   2   2  -213187.05  282.36
   2   2  -213834.02  298.06
  -2  -2   213680.74  297.24
   2  -2  -213956.74  310.62
   2  -2  -212836.24  266.54
   2   2  -1 5867.98  124.57
  -2   2   1 5842.25  120.52
  -2  -2   1 5129.13  113.10
   2  -2  -1 5722.67  138.69
  -2  -2   1 5626.37  120.09
   2  -2  -1 5723.37  118.55
  -2   2   0 1601.40   96.08
  -2   2   0 2009.90  118.19
   2   2   0 1806.50  105.72
   2   2   0 1875.55  110.71
  -2  -2   0 1723.18  101.44
   2  -2   0 1764.63  105.82
   2  -2   0 1785.87  105.74
  -2  -2   0 1693.75   99.44
  -2   2  -111778.60  248.84
   2   2   112483.74  259.19
  -2   2  -111539.97  243.22
   2  -2   112803.90  264.62
   2  -2   113098.89  277.32
  -2  -2  -112053.08  252.34
  -2   2  -220955.22  430.69
  -2   2  -221054.31  440.89
   2   2   220284.91  419.80
   2   2   219392.97  407.42
  -2  -2  -219855.13  410.26
   2  -2   219965.04  423.59
  -2  -2  -221276.90  443.06
   2  -2   220030.99  412.10
   2   2   3 3941.07  107.76
  -2   2  -3 3967.41   92.50
   2   2   3 4081.18  110.83
  -2   2  -3 4038.37  107.07
  -2  -2  -3 4117.26   99.37
   2  -2   3 3780.46  104.45
   2  -2   3 3897.31   90.66
  -2  -2  -3 4048.93  101.92
  -2   2  -4 3789.20  101.83
  -2   2  -4 3522.48   79.26
   2   2   4 3545.95   82.03
   2   2   4 3387.86   96.01
  -2  -2  -4 3387.23   79.04
   2  -2   4 3432.65  128.66
   2  -2   4 3528.21   85.91
  -2  -2  -4 3572.97   89.53
   2   2   5 2202.77  101.98
  -2   2  -5 2179.50   80.20
   2   2   5 2252.83   84.60
  -2   2  -5 2086.63  150.66
  -2  -2  -5 2218.66  101.42
   2  -2   5 2633.58  124.99
   2  -2   5 2092.23   78.73
  -2  -2  -5 2090.59  118.63
   2   2   6   96.72   19.75
  -2   2  -6  188.00   35.22
  -2   2  -6  212.13   50.48
   2   2   6   95.15   31.48
   2  -2   6  194.08   44.72
   2  -2   6  201.48   26.81
  -2  -2  -6  191.23   36.73
  -2  -2  -6  178.85   32.41
  -2   2  -7 4656.83  268.95
   2   2   7 4462.86  273.02
  -2  -2  -7 4209.60  244.45
   2  -2   7 4107.68  244.35
   2  -2   7 4589.55  279.31
  -2   2  -8  595.83  155.12
   2   2   8  839.03  171.58
  -2  -2  -8  814.88  122.06
   2  -2   8  669.15  128.95
   2   2   9   21.20   47.55
  -2   2  -9   94.48   25.35
   2  -2   9  116.13   74.00
  -2  -2  -9   81.93   26.48
   2   2  10   44.46   40.90
  -2   2 -10   52.94   27.32
   2  -2  10   69.31   53.89
  -2  -2 -10   64.00   32.63
  -2   2 -11    5.59   17.53
   2   2  11  123.26   70.36
  -2  -2 -11   25.99   21.90
   2  -2  11   96.32   68.74
  -2   4  12   -2.25   40.41
   2  -4 -12   79.18   34.46
  -2  -4  12  144.43   63.01
  -2   4  11  400.97   64.97
   2  -4 -11  199.54   95.99
  -2  -4  11  355.03  104.30
   2   4 -10 2402.12  242.76
  -2   4  10 2252.11  360.86
   2  -4 -10 2874.83  294.61
  -2  -4  10 2481.03  364.83
   2   4  -9   98.50   29.90
  -2   4   9  185.10   58.51
   2  -4  -9  285.12   73.04
  -2  -4   9  394.49   85.27
   2   4  -8  442.18  144.19
  -2   4   8  739.72  159.13
   2   4  -8  906.56  144.50
  -2  -4   8  876.83  144.55
   2  -4  -8  753.42  114.39
   2  -4  -8  453.46  138.96
   2   4  -7 2404.87  118.15
   2   4  -7 1621.46  226.22
  -2   4   7 2347.90  126.89
   2  -4  -7 2128.21  247.00
  -2  -4   7 2687.61  149.16
   2  -4  -7 2512.41  128.79
   2  -4  -7 2250.77  119.52
  -2   4   6 6706.50  231.37
   2   4  -6 7061.14  245.62
   2   4  -6 7076.45  228.05
   2   4  -6 7269.69  251.61
   2  -4  -6 6795.22  259.22
  -2  -4   6 7096.17  249.49
   2  -4  -6 7514.74  249.62
   2  -4  -6 7116.40  242.60
  -2   4   5  974.08   87.97
   2   4  -5  930.03  170.32
   2   4  -5  978.20   84.14
   2   4  -5 1042.01  100.00
   2  -4  -5 1297.89  217.26
  -2  -4   5  956.84  108.04
   2  -4  -5 1026.05   95.17
   2  -4  -5  846.12   91.78
  -2   4   4 1900.86  132.14
   2   4  -4 2154.04  147.04
   2   4  -4 2009.61  135.56
   2   4  -4 1954.00  135.93
   2  -4  -4 2213.98  110.15
  -2  -4   4 1935.77  150.18
   2  -4  -4 1970.40  146.47
   2  -4  -4 2247.57   59.33
  -2   4   3 4661.65  106.25
   2   4  -3 4778.07  114.00
   2   4  -3 4889.21  122.97
   2  -4  -3 4563.94  138.08
  -2  -4   3 4751.89  149.20
   2  -4  -3 4766.27  111.22
   2  -4  -3 4535.94  104.00
   2   4  -210643.74  220.70
  -2   4   211077.33  268.19
   2   4  -211051.54  256.54
  -2  -4   2 9998.86  214.38
   2  -4  -211524.20  268.47
   2  -4  -210819.39  223.07
  -2   4   1   64.89   46.24
  -2   4   1   17.36    6.11
   2   4  -1   31.13    9.59
   2   4  -1   42.90   14.10
   2  -4  -1   60.46   26.37
   2  -4  -1   33.97    7.89
  -2  -4   1   41.45   11.39
   2   4   0 6785.44  145.53
  -2   4   0 7017.97  149.27
   2  -4   0 6971.55  150.60
  -2  -4   0 6959.00  147.46
  -2   4  -117703.26  367.66
   2   4   116498.55  341.06
   2   4   115883.07  329.61
  -2   4  -117071.30  356.66
   2  -4   115083.74  310.66
   2  -4   116532.35  347.20
  -2  -4  -116754.37  346.08
  -2  -4  -118413.49  380.26
  -2   4  -235131.51  716.31
  -2   4  -236779.41  757.90
   2   4   237266.81  761.08
   2   4   238653.89  794.06
  -2  -4  -237035.09  756.31
   2  -4   237894.10  770.19
   2  -4   235566.35  735.09
  -2  -4  -234182.93  698.69
  -2   4  -312425.16  261.01
  -2   4  -312343.36  273.61
   2   4   311648.17  249.51
   2   4   311537.58  254.15
   2  -4   311988.26  255.02
   2  -4   311902.60  268.40
  -2  -4  -312009.47  257.18
  -2  -4  -313105.06  282.74
  -2   4  -4 4803.72   99.38
   2   4   4 4560.76  102.20
   2   4   4 4823.70  118.37
  -2   4  -4 4485.96  114.99
  -2  -4  -4 4647.71  102.86
   2  -4   4 5205.90  132.79
   2  -4   4 4703.14   99.05
  -2  -4  -4 4850.51  117.50
   2   4   5 1118.12   76.20
  -2   4  -5 1014.19   68.31
   2   4   5 1062.42  168.83
  -2   4  -5  807.72  187.32
   2  -4   5  927.25   74.74
   2  -4   5 1029.05   69.49
  -2  -4  -5 1109.17   76.50
  -2  -4  -5 1119.05   81.45
  -2   4  -6 6445.53  331.45
   2   4   6 6447.95  342.57
   2   4   6 6177.57  331.28
  -2  -4  -6 6189.54  324.61
   2  -4   6 6547.76  351.15
   2  -4   6 6185.01  317.78
  -2   4  -7 2397.26  142.58
   2   4   7 2446.48  160.34
  -2  -4  -7 2360.58  143.80
   2  -4   7 2590.01  213.03
  -2   4  -8  147.45   41.13
   2   4   8  294.43   72.60
  -2  -4  -8  179.61   58.90
   2  -4   8  119.09   46.97
  -2   4  -9  986.19  107.91
   2   4   9 1220.88  158.71
  -2  -4  -9 1139.40  103.76
   2  -4   9 1343.19  323.42
  -2   4 -10   47.26   26.14
   2   4  10  118.32   76.40
  -2  -4 -10   74.04   28.16
   2  -4  10  287.42   84.49
  -2   4 -11  164.00   85.34
   2   4  11  369.85  145.44
  -2  -4 -11  322.36   61.46
   2  -4  11  220.74   70.33
  -2   6  11 1627.99  204.29
   2  -6 -11 1688.54  124.00
  -2  -6  11 1681.67  341.38
   2   6 -10  108.48   44.93
  -2   6  10  328.04   49.83
   2  -6 -10  233.48   70.42
  -2  -6  10  273.24   83.80
   2   6  -9  571.72  107.72
  -2   6   9  711.66  104.72
   2  -6  -9  732.27  194.02
  -2  -6   9  422.88  138.42
   2   6  -8  624.18  180.64
   2   6  -8 1004.50  143.52
  -2   6   8  848.26  172.75
   2  -6  -8  890.93  188.15
  -2  -6   8 1139.88  210.81
   2   6  -7  342.81  107.80
  -2   6   7  523.00   62.46
   2   6  -7  576.48   60.66
  -2  -6   7  598.69   94.88
   2  -6  -7  549.90   71.56
   2  -6  -7  352.43   78.16
   2   6  -6  895.62  147.50
   2   6  -6  952.99   62.53
  -2   6   6 1097.72   71.49
   2   6  -6  846.64  183.97
   2  -6  -6  841.43  185.88
  -2  -6   6 1186.13  166.79
   2  -6  -6 1006.93   74.06
  -2   6   5 5305.58  179.95
   2   6  -5 5890.84  201.29
   2   6  -5 5304.55  169.42
   2   6  -5 5197.56  185.42
   2  -6  -5 4750.87  206.65
  -2  -6   5 5393.45  198.36
   2  -6  -5 5145.55  206.10
   2  -6  -5 5726.05  190.36
   2   6  -4  805.86   55.87
   2   6  -4  851.82   63.06
  -2   6   4 1000.03   71.31
   2   6  -4  970.29   77.10
  -2  -6   4  939.44   80.12
   2  -6  -4  824.94   62.30
   2  -6  -4  991.17  186.27
   2  -6  -4  961.08   83.23
   2   6  -3  377.83   24.95
   2   6  -3  338.54   38.01
  -2   6   3  362.19   27.20
   2   6  -3  513.04   74.77
   2  -6  -3  417.86   52.33
  -2  -6   3  429.60   89.02
   2  -6  -3  637.88   96.70
   2  -6  -3  384.12   40.79
   2   6  -2 4807.25  123.56
  -2   6   2 4792.13  147.69
   2   6  -2 5030.84  104.94
   2  -6  -2 5129.50  210.03
  -2   6   1  141.13   46.94
  -2   6   1   25.47    6.77
   2   6  -1   16.62    7.59
   2   6  -1   40.47   18.29
   2  -6  -1   46.03   25.63
   2  -6  -1   18.31    7.53
  -2  -6   1   12.30    7.59
   2   6   0 4423.33   98.41
  -2   6   0 3848.85  108.31
  -2   6   0 4129.72   94.19
   2   6   0 3979.13   90.53
   2  -6   0 4217.06   96.46
  -2  -6   0 4356.08   97.20
   2  -6   0 4737.16  120.74
  -2  -6   0 4144.25   93.76
  -2   6  -1 7830.51  173.84
   2   6   1 7571.27  164.91
   2   6   1 7729.50  168.40
   2  -6   1 7685.56  167.66
   2  -6   1 7796.81  176.54
  -2  -6  -1 7263.21  157.51
  -2  -6  -1 7196.24  154.00
  -2   6  -2 5170.55  118.91
  -2   6  -2 4610.16  114.29
   2   6   2 5335.07  128.61
   2  -6   2 5045.84  156.21
   2  -6   2 4695.06  104.26
  -2  -6  -2 4840.18  120.67
  -2  -6  -2 4812.61  110.69
  -2   6  -3 1716.76  112.94
   2   6   3 1843.04  123.66
   2   6   3 1622.14  112.44
  -2   6  -3 1868.18  130.68
   2  -6   3 1746.06  113.72
   2  -6   3 1847.74  131.41
  -2  -6  -3 2005.23  135.08
  -2  -6  -3 1589.69  107.62
  -2   6  -4  526.51   71.23
   2   6   4  512.21   65.38
  -2   6  -4  371.32   98.28
   2   6   4  537.01  122.75
   2  -6   4  490.40   44.62
   2  -6   4  318.88   46.64
  -2  -6  -4  729.42  126.39
  -2  -6  -4  504.40   84.04
  -2   6  -5 2432.76   87.10
  -2   6  -5 2353.54  100.48
   2   6   5 2067.63   94.33
   2  -6   5 2484.42  109.90
  -2  -6  -5 2398.74   93.54
   2  -6   5 2249.54   80.41
  -2  -6  -5 2341.87   92.15
  -2   6  -6    7.77   10.96
   2   6   6    4.51   22.61
   2   6   6   78.52   31.10
  -2  -6  -6   44.39   23.88
   2  -6   6   47.23   37.88
   2  -6   6   21.17   12.47
  -2  -6  -6   36.95   18.80
  -2   6  -7  640.02   68.65
   2   6   7  549.45   74.29
   2  -6   7  524.78   56.97
   2  -6   7  798.66  108.41
  -2  -6  -7  604.52   77.36
  -2   6  -8   79.46   27.42
   2   6   8   10.17   37.79
   2  -6   8   52.69   23.22
   2  -6   8  136.01   52.95
  -2  -6  -8   85.82   38.74
  -2   6  -9  193.09   44.34
   2   6   9  132.53   40.31
  -2  -6  -9  248.72   70.51
   2  -6   9  295.97   77.61
   2   6  10  534.24  102.42
  -2  -6 -10  226.91  105.98
   2  -6  10  544.13  118.88
   2   6  11  915.88  240.31
  -2  -6 -11  712.01  194.11
   2  -6  11  547.08  245.98
   2  -8 -12   15.34   32.91
  -2  -8  12   38.55   23.58
  -2   8  11  265.49  117.53
   2  -8 -11  238.41  139.75
  -2  -8  11  539.91  151.99
   2   8 -10  219.09   28.75
  -2   8  10  363.41   58.66
   2  -8 -10  285.94   72.83
  -2  -8  10  180.81   74.29
   2   8  -9 2126.09  194.60
  -2   8   9 2142.89  208.20
   2  -8  -9 2432.95  231.39
  -2  -8   9 2297.29  314.46
   2   8  -8   37.82   26.21
   2   8  -8   22.10   14.61
  -2   8   8   12.93   31.78
   2  -8  -8   38.57   23.40
  -2  -8   8   52.25   36.22
   2  -8  -8   19.83   12.50
   2   8  -7  158.13   51.13
   2   8  -7  168.21   49.22
  -2   8   7  151.59   41.35
   2  -8  -7  152.26   35.28
  -2  -8   7  270.15   72.40
   2   8  -6  201.31   32.16
   2   8  -6  285.94   37.88
  -2   8   6  328.12   31.63
   2  -8  -6  197.12   65.44
   2  -8  -6  355.21   62.32
  -2  -8   6  392.36   77.11
   2  -8  -6  201.70   24.63
  -2   8   5  543.98   44.36
   2   8  -5  364.36   72.77
   2   8  -5  615.67   44.96
   2   8  -5  661.70  132.86
   2  -8  -5  453.96   97.70
  -2  -8   5  769.52  119.15
   2  -8  -5  759.25  140.54
  -2   8   4  283.68   55.60
   2   8  -4  196.65   28.89
   2   8  -4  265.40   27.90
   2   8  -4  366.43   80.80
   2  -8  -4  228.00   42.23
  -2  -8   4  449.82   77.44
   2  -8  -4  295.10   37.37
   2  -8  -4  274.24   45.16
   2   8  -3 3618.10   64.88
   2   8  -3 3765.69   68.44
   2   8  -3 3934.79  100.68
  -2   8   3 3664.69   72.90
   2  -8  -3 3695.54  124.82
   2  -8  -3 3787.96   92.08
   2  -8  -3 3654.85   69.39
   2   8  -2  187.19   21.39
  -2   8   2  269.95   69.87
   2   8  -2  143.30   36.08
  -2  -8   2  173.22   18.35
   2  -8  -2  327.62   71.55
   2   8  -1   72.49   12.11
  -2   8   1  -30.21   46.92
   2   8  -1   57.16   20.36
  -2   8   1   60.79   10.88
   2  -8  -1  109.69   33.41
  -2  -8   1   39.72   12.83
  -2   8   0  812.25   76.03
  -2   8   0  755.28   50.38
   2   8   0  761.14   49.36
   2   8   0  677.97   46.09
   2  -8   0  766.61   61.77
   2  -8   0  604.26   42.29
  -2  -8   0  696.51   44.30
  -2  -8   0  732.80   47.44
  -2   8  -1 5416.77  140.96
  -2   8  -1 5312.85  125.30
   2   8   1 5343.88  120.50
   2   8   1 5880.96  137.79
   2  -8   1 5649.71  137.55
  -2  -8  -1 5611.82  132.43
  -2  -8  -1 5446.25  119.83
  -2   8  -2  837.38   57.76
   2   8   2  972.64   64.51
   2   8   2  977.08   68.87
  -2   8  -2  986.83   66.97
  -2  -8  -2 1113.09   71.03
   2  -8   2  935.80   59.28
  -2  -8  -2 1135.56   72.04
   2  -8   2 1198.05   88.14
  -2   8  -331617.42  585.57
   2   8   331849.53  579.66
   2   8   334277.50  619.92
   2  -8   333239.79  588.17
   2  -8   334302.31  633.28
  -2  -8  -335153.46  632.37
  -2  -8  -334522.56  616.97
  -2   8  -4  532.53   73.86
  -2   8  -4  418.89   91.81
   2   8   4  458.52   47.87
   2   8   4  556.89   86.35
   2  -8   4  661.47   77.88
   2  -8   4  569.97   64.92
  -2  -8  -4  594.97   73.88
  -2  -8  -4  523.18   50.69
  -2   8  -5 4461.97  148.11
  -2   8  -5 4423.20  172.66
   2   8   5 4485.51  161.16
   2   8   5 4451.78  164.25
  -2  -8  -5 4376.89  156.49
   2  -8   5 4273.02  172.54
   2  -8   5 4506.54  148.69
  -2  -8  -5 3988.85  138.87
  -2   8  -6  549.83  100.98
   2   8   6  545.18  105.45
   2  -8   6  479.25   70.00
   2  -8   6  736.94  154.59
  -2  -8  -6  516.20   77.88
  -2  -8  -6  541.83  112.97
  -2   8  -7  907.34  126.36
   2   8   7  936.49  135.70
   2  -8   7  761.74  111.52
   2  -8   7  942.73  121.15
  -2  -8  -7  956.26  161.52
  -2   8  -8  261.56   76.11
   2   8   8  356.17   71.17
   2  -8   8  161.03   44.58
   2  -8   8  277.42   57.63
  -2  -8  -8  267.57   49.87
  -2   8  -9 1523.36   97.50
   2   8   9 2028.47  237.96
  -2  -8  -9 1549.74  135.43
   2  -8   9 1497.73  122.61
  -2   8 -10   19.01   21.68
   2   8  10   62.31   41.00
  -2  -8 -10   80.12   34.79
   2  -8  10  109.27   58.29
   2   8  11  339.38  146.10
  -2  -8 -11  882.69  158.98
   2  -8  11  511.31  233.38
   2 -10 -11  223.99  129.60
  -2 -10  11  363.25  132.81
  -2  10  10  348.63   90.98
   2 -10 -10  662.74  112.88
  -2 -10  10  611.78  119.03
   2  10  -9 1971.38  179.77
  -2  10   9 1944.06  190.55
   2 -10  -9 2266.64  214.54
  -2 -10   9 2358.43  305.28
   2  10  -8 4606.24  304.55
  -2  10   8 4761.09  325.13
   2 -10  -8 4804.11  331.02
  -2 -10   8 5261.48  589.39
   2 -10  -8 4468.60  302.96
   2  10  -7 1157.70  116.21
   2  10  -7 1290.74  124.57
  -2  10   7 1108.86  144.43
   2 -10  -7 1402.39  146.10
  -2 -10   7 1209.05  221.38
   2 -10  -7 1121.97  114.80
   2  10  -6  379.33   54.54
  -2  10   6  484.63   74.62
   2 -10  -6  623.67  120.02
  -2 -10   6  446.35  105.08
   2 -10  -6  448.57   85.58
  -2  10   5 2123.71   79.86
   2  10  -5 2026.05  103.73
  -2 -10   5 2100.43  214.95
   2 -10  -5 1638.28  301.95
   2 -10  -5 2187.63   89.36
   2 -10  -5 2288.02   82.01
   2  10  -4 3945.07  138.60
  -2  10   4 4150.00  127.33
  -2 -10   4 4177.82  150.75
   2 -10  -4 4196.51  175.01
   2 -10  -4 3961.81  137.77
   2 -10  -4 4122.31  122.69
  -2  10   3   38.38   13.30
   2  10  -3   27.42   18.60
   2 -10  -3   50.12   23.71
   2 -10  -3   41.39   48.10
   2 -10  -3    4.96    3.73
  -2  10   2 3152.40   61.18
   2  10  -2 3149.64   60.72
   2  10  -2 3221.93   88.60
   2 -10  -2 3496.04  168.97
   2 -10  -2 2999.15   76.41
  -2 -10   2 3304.55   63.00
  -2  10   1 8912.62  238.59
  -2  10   1 8782.38  185.51
   2  10  -1 8712.39  187.95
   2  10  -1 9064.31  190.07
   2 -10  -1 9964.38  244.71
  -2 -10   1 9202.41  193.08
  -2  10   0  495.98   87.64
   2  10   0  440.27   64.86
   2  10   0  365.32   53.39
  -2  10   0  400.34   53.03
   2 -10   0  247.67   34.12
   2 -10   0  391.87   40.33
  -2 -10   0  306.11   23.76
  -2 -10   0  314.17   24.02
   2  10   1 1226.03   76.21
  -2  10  -1 1416.32   96.30
  -2  10  -1 1478.18  104.26
   2  10   1 1380.95   89.36
   2 -10   1 1474.39   93.76
  -2 -10  -1 1646.07  100.36
  -2 -10  -1 1527.37   97.19
   2 -10   1 1949.37  129.34
  -2  10  -2 2363.87   73.53
   2  10   2 2317.85   63.49
  -2  10  -2 2199.86  209.71
   2  10   2 2283.39   61.08
  -2 -10  -2 2427.85   63.95
   2 -10   2 2383.25   84.76
  -2 -10  -2 2170.87  186.74
  -2  10  -3  556.07   52.81
  -2  10  -3  760.51   80.50
   2  10   3  757.35   72.01
   2  10   3  695.63   86.95
   2 -10   3  672.63   59.11
   2 -10   3  867.96  125.14
  -2 -10  -3  741.43   84.39
  -2 -10  -3  849.67  122.90
  -2  10  -410685.68  340.48
  -2  10  -4 9565.72  319.11
   2  10   4 9928.81  322.22
   2  10   4 9589.50  313.53
   2 -10   4 9842.34  310.50
   2 -10   410428.80  377.43
  -2 -10  -410564.25  342.31
  -2 -10  -410167.34  325.55
   2  10   5 7309.10  254.79
  -2 -10  -5 7422.51  250.33
   2 -10   5 6985.30  276.56
   2 -10   5 6944.01  231.07
  -2 -10  -5 6301.40  212.70
  -2  10  -6  807.91  129.64
   2  10   6 1052.00  174.45
  -2 -10  -6 1008.63  147.44
   2 -10   6  790.97  124.07
   2 -10   6  890.09  136.76
  -2  10  -7 2068.15  150.03
   2  10   7 2633.12  339.19
   2 -10   7 1966.76  142.69
   2 -10   7 2069.30  168.37
  -2 -10  -7 2157.86  164.48
  -2  10  -8  196.46   56.06
   2  10   8  201.57   66.94
   2 -10   8  192.86   43.96
   2 -10   8  138.96   57.18
  -2 -10  -8  301.94   56.55
  -2  10  -9    3.31   11.52
  -2 -10  -9   15.00   21.32
   2 -10   9   66.42   45.65
   2  10  10 2149.19  168.49
  -2 -10 -10 1674.96  157.84
   2 -10  10 1516.25  325.63
   2  10  11  266.57  115.80
  -2 -10 -11  314.71   67.30
   2 -10  11  303.64  106.95
   2 -12 -11  101.18   54.52
  -2 -12  11  401.39  109.12
   2 -12 -10  192.75   52.56
  -2 -12  10  298.86   80.79
  -2  12   9  333.77  109.22
   2 -12  -9  734.15   61.42
  -2 -12   9  632.50  105.58
  -2  12   8 1513.78  114.32
   2 -12  -8 1388.44  121.08
  -2 -12   8 1712.46  290.28
  -2  12   7  934.87  137.62
   2 -12  -7 1007.29  175.83
  -2 -12   7 1042.10  175.61
   2 -12  -7  895.51   98.68
  -2  12   6 2152.98  111.38
   2 -12  -6 2280.74  130.31
  -2 -12   6 2432.62  241.22
   2 -12  -6 2042.35  108.62
  -2  12   5   83.37   19.03
   2 -12  -5  111.52   30.56
  -2 -12   5   51.96   32.12
   2 -12  -5   56.71   12.53
  -2  12   4 1106.22   71.02
   2  12  -4 1085.41   82.89
   2 -12  -4 1371.45  195.54
  -2 -12   4 1335.48  205.12
   2 -12  -4 1389.27   80.19
   2 -12  -4 1091.28   67.92
  -2  12   315752.71  446.85
   2 -12  -315166.47  442.16
   2 -12  -314515.45  409.32
  -2  12   2 1275.25   82.66
   2  12  -2  873.06  116.18
   2  12  -2 1103.55   74.53
  -2  12   2 1118.24   81.79
   2 -12  -2 1266.09  215.65
  -2 -12   2 1120.55   78.95
   2 -12  -2 1038.11   75.17
  -2  12   1 5300.09  172.27
  -2  12   1 4999.73  101.62
   2  12  -1 4841.19  101.78
   2  12  -1 5196.43  102.37
   2 -12  -1 5247.10  144.43
  -2 -12   1 5242.78  109.98
  -2  12   0  124.10   45.33
  -2  12   0   70.42   13.85
   2  12   0  105.22   23.63
   2  12   0  111.49   26.04
   2 -12   0  137.33   46.64
   2 -12   0  101.58   31.06
  -2 -12   0   72.86   14.63
  -2  12  -1  504.39   83.82
  -2  12  -1  431.99   42.89
   2  12   1  489.91   61.17
   2  12   1  436.63   47.95
   2 -12   1  735.33   85.10
   2 -12   1  533.02   51.23
  -2 -12  -1  446.78   37.07
  -2 -12  -1  528.62   68.91
  -2  12  -2 2976.54   86.57
  -2  12  -2 3005.89   90.41
   2  12   2 3129.02   83.04
   2  12   2 3395.72   82.60
   2 -12   2 3467.96   79.15
   2 -12   2 3239.37   93.50
  -2 -12  -2 3252.66   79.11
  -2 -12  -2 3509.20   77.46
  -2  12  -319967.93  580.17
  -2  12  -319090.05  561.02
   2  12   318454.72  537.14
   2  12   316683.72  481.76
  -2 -12  -318708.29  541.04
   2 -12   318935.16  537.79
   2 -12   319312.63  567.64
  -2 -12  -318520.69  529.07
  -2  12  -4 4044.50  137.47
  -2  12  -4 4755.36  172.26
   2  12   4 4797.36  166.03
   2  12   4 4748.80  167.41
   2 -12   4 4762.34  207.85
   2 -12   4 4755.17  153.42
  -2 -12  -4 5419.86  180.99
  -2  12  -5 1869.43  154.25
   2  12   5 1518.31   92.01
  -2 -12  -5 1944.39  113.63
   2 -12   5 1886.10  125.27
   2 -12   5 1695.23  102.97
  -2 -12  -5 1737.62   98.28
  -2  12  -6   -0.78    7.94
   2  12   6   -8.27   26.41
  -2 -12  -6   39.36   27.29
   2 -12   6  110.06   42.99
  -2  12  -7   55.11   20.39
   2  12   7   10.77   36.19
   2 -12   7   80.33   23.57
   2 -12   7  244.89   66.87
  -2 -12  -7  190.66   53.81
  -2  12  -8   90.87   37.93
  -2 -12  -8  109.51   35.49
   2 -12   8  105.20   73.44
  -2  12  -9 2076.78  233.53
   2  12   9 2095.01  252.87
  -2 -12  -9 2022.74  211.31
   2 -12   9 2144.99  239.70
   2  12  10  294.81  104.96
  -2 -12 -10  300.97   65.45
   2 -12  10  669.27  124.33
   2  12  11  768.52  144.44
  -2 -12 -11  765.36  143.63
   2 -12  11  623.09  221.04
   2 -14 -11  285.84   58.13
  -2 -14  11  250.92   77.91
  -2  14  10   37.02   23.90
   2 -14 -10  257.54   44.62
  -2 -14  10  247.38   73.23
  -2  14   9 1093.23  112.33
   2 -14  -9 1200.08  181.98
  -2 -14   9 1115.29  225.97
  -2  14   8  728.02  121.45
   2 -14  -8  911.46  126.37
  -2 -14   8 1065.40  188.61
  -2  14   7   80.51   28.97
   2 -14  -7   75.88   25.32
  -2 -14   7   58.10   42.50
  -2  14   6   43.49   20.07
   2 -14  -6   67.65   34.02
  -2 -14   6   82.34   38.22
   2 -14  -6    3.01    7.32
  -2  14   5 1063.63   97.54
   2 -14  -5 1081.71   74.74
  -2 -14   5 1398.31  228.30
   2 -14  -5 1224.31   70.33
  -2  14   4    4.60   14.44
   2  14  -4   61.09   26.65
   2 -14  -4  114.64   34.28
   2 -14  -4   52.56   30.32
   2 -14  -4    6.43    3.14
  -2  14   3  109.14   15.23
   2  14  -3  175.19   30.21
   2 -14  -3  193.31   42.69
   2 -14  -3  100.79   42.48
  -2  14   2 4479.72  130.25
   2  14  -2 4263.76  149.12
   2  14  -2 4736.11  138.60
  -2  14   2 4407.11  131.60
   2 -14  -2 4175.79  172.06
  -2 -14   2 4627.06  134.89
   2 -14  -2 4593.88  147.35
   2  14  -1  782.17   58.36
  -2  14   1  671.92   67.98
   2  14  -1  760.95   56.13
  -2  14   1  710.92   48.37
   2 -14  -1  896.37  191.23
  -2 -14   1  777.07   54.57
   2 -14  -1  803.05   62.12
  -2  14   0 2469.03  314.40
  -2  14   0 2040.14  138.83
   2  14   0 2101.99  138.20
   2  14   0 2147.66  142.40
   2 -14   0 1608.47  119.16
   2 -14   0 2086.34  140.96
  -2 -14   0 2318.64   62.51
  -2  14  -1   66.36   30.34
  -2  14  -1   33.41   22.94
   2  14   1   11.80   20.14
   2  14   1    1.10   15.16
   2 -14   1   98.66   34.57
   2 -14   1   58.80   20.75
  -2 -14  -1   30.02   16.58
  -2 -14  -1   12.41   10.09
  -2  14  -2 3557.28  157.86
  -2  14  -2 3337.90  121.17
   2  14   2 3140.45  107.16
   2  14   2 3358.11  111.07
   2 -14   2 3098.15  100.77
   2 -14   2 3254.76  119.08
  -2 -14  -2 3381.11  113.35
  -2 -14  -2 3270.10  103.77
  -2  14  -3   28.33   18.19
  -2  14  -3   75.60   27.43
   2  14   3   75.41   23.71
   2  14   3  121.16   33.69
   2 -14   3   18.00    7.97
   2 -14   3  145.10   44.12
  -2 -14  -3   30.25   17.40
  -2 -14  -3   23.15   14.49
  -2  14  -4 6063.16  210.73
  -2  14  -4 4978.38  181.60
   2  14   4 5966.18  208.01
   2 -14   4 6015.32  221.12
   2 -14   4 5517.21  177.61
  -2 -14  -4 5512.38  193.97
  -2 -14  -4 5227.63  173.40
  -2  14  -5  754.15  119.80
   2  14   5  394.83   79.85
  -2 -14  -5  619.15  119.05
   2 -14   5  564.83  122.01
  -2 -14  -5  393.60   76.43
  -2  14  -6 1833.53  135.31
   2  14   6 2174.79  167.55
   2 -14   6 1966.78  145.28
   2 -14   6 2381.19  279.92
  -2 -14  -6 2220.74  179.09
  -2 -14  -6 1946.53  144.73
   2  14   7   32.16   32.41
   2 -14   7   11.38   10.06
   2 -14   7  134.61   75.42
  -2 -14  -7   54.29   32.01
  -2  14  -8   52.42   19.43
   2  14   8   74.88   51.80
  -2 -14  -8  143.32   43.57
   2 -14   8   18.47   32.21
   2  14   9   96.47   40.93
  -2 -14  -9   71.01   34.79
   2  14  10 1095.01  337.53
  -2 -14 -10 1601.67  148.20
   2 -14  10 1367.33  359.09
   2  14  11  275.46   98.09
   2 -14  11  184.76   71.49
  -2 -16  11  145.30   60.32
   2 -16 -10   86.11   53.25
  -2 -16  10  137.04   70.38
  -2  16   9   46.69   29.22
   2 -16  -9  158.11   43.50
  -2  16   8  194.79   53.59
   2 -16  -8  256.68   46.79
  -2 -16   8  284.43   65.37
  -2  16   7  219.52   61.76
   2 -16  -7  243.48   62.58
  -2 -16   7  365.82   77.73
   2 -16  -7  161.64   38.98
  -2  16   6   54.17   23.19
   2 -16  -6   83.94   35.05
  -2 -16   6   38.73   23.31
   2 -16  -6   44.39   13.49
  -2  16   5 1506.65  138.02
   2 -16  -5 1424.75   84.96
   2 -16  -5 1330.20   64.60
  -2  16   4   89.70   14.16
   2 -16  -4  208.23   43.78
   2 -16  -4  189.83   24.73
   2  16  -3  862.45  201.43
  -2  16   3 1669.37   67.29
   2 -16  -3 1380.45   81.41
   2 -16  -3 1197.61  198.69
  -2 -16   3 1257.77  120.84
   2  16  -2  129.52   25.23
   2  16  -2  109.37   30.30
  -2  16   2  113.04   32.88
  -2  16   2  195.90   30.91
  -2 -16   2  194.62   27.26
   2 -16  -2  177.47   27.77
   2 -16  -2  188.73   49.88
   2  16  -1  467.18   51.75
   2  16  -1  331.24   66.57
  -2  16   1  454.93   92.19
   2  16  -1  437.19   40.82
  -2  16   1  442.18   43.84
  -2 -16   1  489.95   50.81
   2 -16  -1  468.34   50.24
   2 -16  -1  540.79  113.97
  -2  16   0 5011.68  174.56
   2  16   0 5048.68  158.39
   2  16   0 4803.19  146.89
   2 -16   0 4730.87  165.08
  -2 -16   0 5258.85  161.01
  -2  16  -1  263.49   61.75
  -2  16  -1  146.77   24.74
   2  16   1  147.90   22.06
   2  16   1  160.98   36.13
   2 -16   1   99.32   38.98
   2 -16   1  204.91   35.88
  -2 -16  -1  199.15   46.18
  -2 -16  -1  216.82   37.11
  -2  16  -2   76.51   26.32
  -2  16  -2   23.10   23.80
   2  16   2    7.45   20.10
   2  16   2   11.65   15.86
   2 -16   2   11.97    9.65
   2 -16   2   22.96   28.77
  -2 -16  -2   92.23   22.81
  -2 -16  -2   49.44   20.76
  -2  16  -3 1560.85  189.43
  -2  16  -3  809.45  177.62
   2  16   3 1260.05  126.11
   2  16   3 1255.14  121.49
   2 -16   3 1479.42   57.94
   2 -16   3 1265.28  141.54
  -2 -16  -3 1406.46   68.81
  -2 -16  -3 1184.16  114.91
  -2  16  -4  572.33   66.30
   2  16   4  645.10   49.08
  -2 -16  -4  713.26   52.47
   2 -16   4  703.67  112.52
   2 -16   4  707.48   41.22
  -2 -16  -4  742.38   71.65
  -2  16  -5  596.96   85.43
   2  16   5  591.50   98.29
  -2 -16  -5  732.71   82.16
   2 -16   5  849.35  106.29
   2 -16   5  665.87   77.07
  -2 -16  -5  554.54   76.11
  -2  16  -6 1098.61  153.28
   2  16   6 1190.49  195.71
  -2 -16  -6 1233.26  143.88
   2 -16   6  947.77  121.69
   2 -16   6  989.76  122.71
  -2  16  -7  120.52   37.11
   2  16   7   95.02   41.11
  -2 -16  -7  311.97   77.81
   2 -16   7  316.41   87.40
   2 -16   7  240.17   39.95
   2  16   8   84.29   41.86
  -2 -16  -8   76.23   34.72
   2 -16   8  116.61   46.35
   2  16   9  191.63   55.62
  -2 -16  -9   80.81   44.88
   2 -16   9  149.38   60.97
  -2 -16 -10   45.30   30.70
   2 -16  10   25.10   39.71
   2 -18 -10   71.15   33.95
  -2 -18  10   29.83   23.02
   2 -18  -9 2699.28  262.59
  -2 -18   9 1863.98  322.82
  -2  18   8  457.72   61.86
   2 -18  -8  423.97  105.26
  -2 -18   8  709.27  152.28
  -2  18   7 1205.64  100.22
   2 -18  -7 1415.91  125.25
  -2 -18   7 1045.58  214.58
   2 -18  -7 1174.10  117.97
  -2  18   6  247.99   50.99
   2 -18  -6  367.90   76.99
   2 -18  -6  223.85   47.78
  -2  18   5 2405.29  152.14
   2 -18  -5 2039.95  132.75
   2 -18  -5 2416.35  138.37
  -2  18   4  698.54  110.43
   2 -18  -4  717.01  167.16
  -2  18   3  571.59   84.81
  -2  18   3  566.55   33.10
   2 -18  -3  661.17   50.20
  -2 -18   3  526.94   69.15
  -2 -18   3  720.10   45.77
   2  18  -2  858.40   87.77
  -2  18   2  792.51   93.91
   2  18  -2  671.49  139.51
  -2  18   2  849.41   83.55
  -2 -18   2  830.87  143.46
  -2 -18   2  855.47   80.94
   2 -18  -2  757.55   76.03
   2 -18  -2  844.53  127.40
   2  18  -1 2706.73  111.08
  -2  18   1 2636.18   97.43
   2  18  -1 2659.77   97.46
  -2  18   1 2550.33   91.72
  -2 -18   1 2774.62   95.86
   2 -18  -1 2359.97  103.62
   2 -18  -1 2804.20  191.36
  -2  18   0  358.49   36.58
   2  18   0  460.88   37.55
   2  18   0  446.73   77.55
   2 -18   0  344.65   47.82
   2 -18   0  396.76   33.80
  -2 -18   0  445.54   36.62
  -2  18  -1 7356.85  273.85
  -2  18  -1 6683.55  228.11
   2  18   1 7033.25  232.40
   2  18   1 6801.01  222.90
   2 -18   1 6515.66  223.83
  -2 -18  -1 7499.27  257.83
  -2  18  -2  313.69   52.39
  -2  18  -2  153.46   32.75
   2  18   2  118.45   24.26
   2  18   2  197.64   39.08
   2 -18   2  147.39   26.28
   2 -18   2  124.97   33.71
  -2 -18  -2   72.80   21.85
  -2 -18  -2  154.64   31.15
  -2  18  -3  274.20   73.96
  -2  18  -3  135.85   37.25
   2  18   3  377.01   51.72
   2 -18   3  497.78   84.09
   2 -18   3  323.80   26.42
  -2 -18  -3  401.17   85.40
  -2 -18  -3  279.19   31.89
  -2  18  -4  185.42   41.98
   2  18   4  244.72   45.98
  -2 -18  -4  239.13   56.25
   2 -18   4  318.51   65.37
   2 -18   4  126.51   23.84
  -2 -18  -4  189.35   39.54
  -2  18  -5 5121.63  369.83
   2  18   5 4240.57  317.09
  -2 -18  -5 5042.36  364.45
   2 -18   5 4572.89  356.90
   2 -18   5 4383.38  307.88
  -2 -18  -5 4183.00  297.21
   2  18   6   30.45   30.19
   2 -18   6   18.96    8.61
   2 -18   6   84.37   49.20
  -2 -18  -6   -8.92   25.95
  -2  18  -7   36.21   14.54
   2  18   7  114.13   50.10
  -2 -18  -7   64.25   35.10
   2 -18   7  137.16   72.76
   2  18   8   46.90   21.90
  -2 -18  -8   33.58   17.94
   2 -18   8  -30.09   45.63
   2  18   9   24.95   18.45
  -2 -18  -9  116.40   64.84
   2 -18   9   69.47   61.34
   2  18  10  106.97   66.03
  -2 -18 -10   46.63   20.48
   2 -18  10   90.95   52.03
   2 -20 -10 1364.83  263.36
   2 -20  -9   31.07   40.60
   2 -20  -8  114.29   32.43
  -2  20   7   61.60   20.63
   2 -20  -7   71.75   35.43
  -2  20   6 3537.31  257.98
   2 -20  -6 3798.64  272.46
   2 -20  -6 3690.48  245.25
  -2  20   5    4.35    5.40
   2 -20  -5   51.07   22.28
  -2  20   4  396.00   53.85
   2 -20  -4  423.85   58.50
  -2  20   3  913.63  132.80
  -2  20   3 1130.89  205.73
   2 -20  -3  954.09  138.45
  -2 -20   3  868.96  124.76
  -2 -20   3 1023.33  143.45
   2  20  -2   37.60   23.67
  -2  20   2   13.73   11.84
   2  20  -2   41.18   24.67
  -2  20   2   15.19    6.31
   2 -20  -2   93.68   23.38
  -2 -20   2   53.95   15.43
   2 -20  -2    2.59   20.13
  -2 -20   2   12.35   19.84
   2  20  -1   33.88   19.66
  -2  20   1   20.84   18.80
   2  20  -1  105.05   20.69
  -2  20   1   61.63   10.97
  -2 -20   1  129.51   23.42
   2 -20  -1  110.90   25.77
   2 -20  -1   70.13   37.97
  -2  20   012821.99  654.23
   2  20   014085.60  713.63
   2  20   014250.33  722.27
   2 -20   011884.52  616.35
   2 -20   013496.01  685.51
  -2 -20   014212.56  720.25
  -2  20  -1  351.98   42.83
   2  20   1  443.05   35.96
   2  20   1  432.52   80.98
   2 -20   1  334.12   81.47
   2 -20   1  431.46   33.01
  -2 -20  -1  559.54   41.89
   2  20   2 1682.14   96.61
   2  20   2 1519.24   93.04
  -2  20  -2 1128.75  195.31
  -2 -20  -2 1514.48   89.45
   2 -20   2 1114.45  103.59
   2 -20   2 1754.41  148.30
   2 -20   2 1462.33   81.54
  -2  20  -3  646.77  170.82
   2  20   3  921.05  150.15
  -2 -20  -3  925.33  135.15
   2 -20   3  911.82  165.15
   2 -20   3  881.77  149.00
  -2 -20  -3  900.15  139.47
  -2  20  -4   21.68   23.45
   2  20   4    4.86   19.32
  -2 -20  -4  -10.27   26.35
   2 -20   4   66.15   32.48
   2 -20   4    1.12    6.15
  -2 -20  -4   14.11   11.49
  -2  20  -5   68.98   21.24
   2  20   5  160.28   50.70
  -2 -20  -5   41.20   23.31
   2 -20   5  180.97   57.96
   2 -20   5   42.82   10.64
  -2 -20  -5   62.17   20.62
  -2  20  -6 6696.31  523.66
   2  20   6 6055.30  466.37
   2 -20   6 6325.74  476.87
   2 -20   6 6468.49  603.47
  -2 -20  -6 7170.16  233.25
   2  20   7  660.35   78.83
  -2 -20  -7  624.67   72.39
   2 -20   7  520.11  102.44
   2  20   8  543.68  164.98
  -2 -20  -8  677.60  182.59
   2 -20   8  633.44  164.35
  -2 -20  -9   98.23   40.52
   2 -20   9   55.83   32.17
  -2 -20 -10   50.90   53.24
   2 -20  10   62.27   41.82
   2 -22 -10  138.45   49.45
   2 -22  -9  150.75   53.05
   2 -22  -8  232.49   89.22
   2 -22  -7   90.24   47.09
  -2  22   6  148.80   34.00
   2 -22  -6  322.96   65.75
  -2  22   5 2725.48  215.70
   2 -22  -5 3242.11  265.57
  -2  22   4  195.28   52.00
  -2  22   4  296.42   36.90
   2 -22  -4  277.14   48.90
  -2  22   3 1561.49  154.55
  -2  22   3 1670.64  116.58
   2 -22  -3 1730.28  145.66
  -2 -22   3 1310.00  149.03
  -2 -22   3 1729.59  104.87
  -2  22   2  196.66   57.10
  -2  22   2  287.04   62.21
   2  22  -2  233.79   42.22
  -2 -22   2  269.80   58.55
  -2 -22   2  282.15   42.55
   2 -22  -2  326.14   69.94
   2  22  -1  409.52   87.10
  -2  22   1  231.69   40.30
  -2  22   1  488.58   89.93
  -2 -22   1  407.37   82.98
   2 -22  -1  240.17   61.63
  -2 -22   1  517.52   83.08
   2 -22  -1  553.25  119.91
   2  22   0 2704.69  134.92
   2  22   0 3235.13  158.23
   2 -22   0 3127.99  154.80
   2 -22   0 2611.34  151.29
  -2 -22   0 3162.79  154.64
  -2  22  -1 4792.77  294.53
   2  22   1 4986.65  237.18
   2 -22   1 5321.45  254.81
   2 -22   1 5034.40  259.46
  -2 -22  -1 5192.73  247.79
   2  22   2  506.20   96.12
  -2 -22  -2  750.07  142.01
   2 -22   2  583.73   61.58
   2 -22   2  453.13   98.80
   2  22   3   68.59   24.99
   2 -22   3   82.98   20.88
   2 -22   3  118.84   43.62
  -2 -22  -3   55.18   17.59
  -2 -22  -3   43.28   22.24
   2  22   4   24.30   16.15
   2 -22   4   11.78    4.81
   2 -22   4   29.24   11.27
   2 -22   4   56.05   24.81
  -2 -22  -4   52.06   28.22
  -2 -22  -4   19.97   16.01
   2  22   5  589.33  122.78
   2 -22   5  679.76   89.88
   2 -22   5  721.82  107.19
   2 -22   5  828.65  159.70
  -2 -22  -5  834.58  209.92
   2  22   6  673.76  109.58
  -2 -22  -6  740.90  201.77
   2 -22   6  902.93  154.10
   2  22   7 1722.88  287.09
  -2 -22  -7 1812.02  194.89
   2 -22   7 1517.47  284.75
  -2 -22  -8   76.09   46.22
   2 -22   8   96.40   60.92
  -2 -22  -9  181.32   52.34
   2 -22   9  143.25   45.11
   2 -24  -9 1299.78  230.40
   2 -24  -8  167.53   83.46
   2 -24  -7  661.66  141.69
  -2  24   6   37.45   13.36
   2 -24  -6   57.11   35.82
  -2  24   5   19.44    9.00
  -2  24   5  107.06   25.59
   2 -24  -5  120.65   53.62
  -2  24   4  186.53   51.88
  -2  24   4  298.70   56.71
   2 -24  -4  488.79  117.22
  -2  24   3 1540.11  173.26
   2  24  -3 1659.02  303.33
   2 -24  -3 1690.01  309.57
  -2 -24   3 1068.98  164.45
  -2 -24   3 1557.77  167.30
  -2  24   2  136.55   41.26
  -2  24   2  208.48   53.10
   2  24  -2  225.57   62.66
  -2 -24   2  217.62   64.85
  -2 -24   2  234.04   65.28
   2 -24  -2  263.28   62.18
  -2  24   1 4924.33  286.28
  -2  24   1 5526.85  313.57
   2  24  -1 5608.98  322.10
  -2 -24   1 4573.16  287.28
  -2 -24   1 5668.52  328.40
   2 -24  -1 5490.52  316.72
   2  24   0  648.54  134.71
  -2  24   0  658.85   69.17
  -2  24   0  469.01  103.15
  -2 -24   0  672.30   73.53
   2 -24   0  783.02   86.08
   2  24   1  527.59   88.92
  -2  24  -1  761.63   88.30
   2 -24   1  799.40  123.38
  -2 -24  -1  715.17  144.03
   2  24   2   58.53   19.19
  -2 -24  -2   -9.94   21.85
   2 -24   2   27.71   24.63
   2  24   3 3091.07  249.20
   2 -24   3 2545.82  233.18
   2 -24   3 3053.78  242.15
   2 -24   3 2725.96  269.44
  -2 -24  -3 3021.29  244.87
   2  24   4  408.36   87.99
   2 -24   4  308.99   67.55
   2 -24   4  608.71   95.74
   2 -24   4  787.84  142.66
  -2 -24  -4  542.21   86.60
   2  24   5  103.96   53.68
   2 -24   5   84.64   22.11
   2 -24   5   79.74   39.84
  -2 -24  -5  146.78   44.66
   2  24   6  544.47   82.73
  -2 -24  -6  648.15   61.24
   2 -24   6  817.37  178.12
   2  24   7  841.57  227.35
  -2 -24  -7 1123.04  185.46
   2 -24   7 1095.69  259.22
  -2 -24  -8   42.54   36.01
   2 -24   8   62.70   53.24
  -2 -24  -9  409.83  184.28
   2 -24   9  202.49   87.74
   2 -26  -9  636.63  122.51
   2 -26  -8 1685.95  159.92
   2 -26  -7  194.42   77.72
  -2  26   5  245.46   56.11
   2 -26  -5  452.54   68.69
   2 -26  -4 2903.06  272.35
  -2  26   3  194.04   50.31
   2  26  -3  329.38   56.90
  -2  26   3  125.01   39.67
  -2 -26   3  351.57   48.63
   2 -26  -3  406.11   68.14
  -2  26   2 2980.53  252.66
  -2  26   2 3782.44  296.99
   2  26  -2 3888.58  310.46
  -2 -26   2 3797.01  313.96
  -2 -26   2 4101.75  322.55
   2 -26  -2 4001.21  323.42
  -2  26   1 1644.78  134.01
   2  26  -1 1656.14  138.73
   2 -26  -1 1607.17  135.51
  -2 -26   1  900.00  207.76
  -2 -26   1 1662.28  136.66
  -2  26   0 1173.39  176.44
   2  26   0 1330.71  246.88
   2 -26   0 1334.84  113.20
  -2 -26   0 1310.99  245.92
   2  26   1  534.96  123.30
  -2 -26  -1  666.82  143.04
   2 -26   1  871.22  169.10
   2 -26   1  293.98  112.07
   2  26   2 3636.65  291.83
  -2 -26  -2 3391.80  274.59
   2 -26   2 3344.05  266.62
   2  26   3 1761.29  155.12
  -2 -26  -3 1654.84  125.11
   2 -26   3 1948.52  135.64
   2 -26   3 1631.13  118.98
   2  26   4 1514.62  127.13
   2 -26   4 1683.45  131.86
   2 -26   4 1561.66  255.25
  -2 -26  -4 1914.36  159.58
   2  26   5  277.65   58.63
  -2 -26  -5  273.83   43.68
   2 -26   5  319.21   76.77
   2  26   6  205.94   58.15
  -2 -26  -7   37.00   28.95
   2 -26   7   45.39   30.55
  -2 -26  -8  576.54  250.97
   2 -26   8  691.53  242.13
   2 -28  -8  144.68   65.98
   2 -28  -7  453.30  199.02
   2 -28  -6  106.71   58.76
   2 -28  -5   75.70   47.36
  -2  28   4    5.74    7.50
   2  28  -4   49.59   18.61
   2 -28  -4   67.51   26.78
   2  28  -3  738.49  153.58
  -2  28   3  548.62  104.06
   2 -28  -3  920.69  166.79
  -2 -28   3  826.89  108.40
  -2  28   2 1245.81  108.14
  -2  28   2 1292.26  119.94
   2  28  -2 1337.79  199.16
  -2 -28   2  783.73  199.88
  -2 -28   2 1256.48  101.59
   2 -28  -2 1489.07  125.79
   2  28  -1   19.17   14.57
  -2  28   1   22.75   11.52
  -2  28   1   -0.13    8.86
  -2 -28   1    3.93   19.52
   2 -28  -1   38.46   25.78
  -2  28   0  349.47   77.41
   2  28   0  242.55   74.09
   2 -28   0  276.87   74.01
  -2 -28   0  331.13   56.78
  -2  28  -1  474.87  108.10
   2  28   1  541.75  108.67
   2 -28   1  544.45   88.60
  -2 -28  -1  703.03   99.13
   2  28   2  399.79   93.59
  -2 -28  -2  383.50   60.21
   2 -28   2  252.61   67.02
   2 -28   2   90.83   54.73
   2  28   3  443.37   89.75
  -2 -28  -3  535.81   63.86
   2 -28   3  356.45   73.03
   2  28   4   71.84   24.96
  -2 -28  -4   34.12   39.31
   2 -28   4   17.76   13.41
   2  28   5  114.82   34.85
  -2 -28  -5  376.29   72.63
  -2 -28  -6  263.73   78.98
   2 -28   6  407.98  103.58
   2  28   7   11.92   24.97
  -2 -28  -7   64.51   29.46
   2 -28   7   86.82   23.07
  -2 -28  -8   46.00   25.06
   2 -28   8   29.46   14.89
   2 -30  -8  377.61  109.14
   2 -30  -7  127.43   65.37
   2 -30  -6   -3.34   38.94
   2  30  -5   84.81   30.32
   2 -30  -5  175.72   60.83
   2  30  -4   59.24   34.01
   2 -30  -4  140.57   53.86
   2  30  -3   38.05   23.64
  -2  30   3   13.32   10.07
   2 -30  -3   77.06   26.95
  -2 -30   3   29.39   10.07
   2  30  -2   44.73   21.49
  -2 -30   2   -1.07   12.74
   2 -30  -2  -17.05   30.73
   2  30  -1   74.23   23.61
  -2 -30   1  112.72   25.60
   2 -30  -1  211.31   44.73
  -2  30   0  183.35   58.08
   2  30   0  290.30   73.14
   2 -30   0  249.91   45.78
  -2 -30   0  223.67   42.51
  -2  30  -1   51.37   26.73
   2  30   1   81.39   23.80
   2 -30   1   61.54   29.92
  -2 -30  -1   33.43   21.50
   2  30   2  344.34   56.95
  -2 -30  -2  475.94   87.08
   2 -30   2  375.68   36.28
   2  30   3   47.52   13.84
  -2 -30  -3  135.89   32.70
   2 -30   3  144.24   26.28
   2  30   4  243.38   51.81
  -2 -30  -4  577.44   71.01
  -2 -30  -5  148.52   59.77
   2  30   6  407.24  158.76
  -2 -30  -6  961.48  100.34
  -2 -30  -7   53.83   31.70
   2 -32  -7   43.02   40.57
   2 -32  -6  479.12  234.32
   2  32  -4  254.67   66.36
   2 -32  -4  414.31   92.28
   2  32  -3   28.83   15.04
   2 -32  -3   15.15   31.74
   2  32  -2   87.03   30.56
  -2  32   2   49.78   15.91
   2 -32  -2   44.34   31.76
  -2 -32   2   51.50   20.46
   2  32  -1  591.20  100.21
   2 -32  -1  545.82  106.93
  -2  32   0 2107.61  131.04
   2  32   0 2198.03  139.60
   2 -32   0 2315.02  150.37
  -2 -32   0 2329.63  147.07
  -2  32  -1  655.49  128.58
   2  32   1  753.80   76.32
   2 -32   1  690.09  139.25
  -2 -32  -1  787.87  136.01
  -2  32  -2  360.81   68.39
   2  32   2  412.14  107.01
   2 -32   2  345.80   83.01
  -2 -32  -2  514.06   66.63
  -2 -32  -3 1701.45  165.56
   2  32   4   39.03   27.15
  -2 -32  -4  130.89   42.16
  -2 -32  -5   25.07   36.46
   2  34  -6   -4.17   30.12
   2  34  -5 2039.65  345.09
   2 -34  -5 2433.91  441.31
   2  34  -4   51.94   25.87
   2 -34  -4   82.17   30.81
   2  34  -3    8.00   26.01
   2 -34  -3   68.20   34.53
   2  34  -2  142.14   43.49
   2 -34  -2  220.52   73.58
  -2  34   1  358.60  105.15
   2  34  -1  351.00  106.81
   2 -34  -1  569.84  102.66
   2  34   0   95.39   41.91
  -2  34   0   87.37   23.69
  -2 -34   0  100.03   30.88
  -2  34  -1 1171.46  157.56
   2  34   1  976.36  204.76
   2 -34   1 1528.93  148.87
  -2 -34  -1 1436.20  142.07
  -2  34  -2   39.55   24.85
   2  34   2   60.60   31.35
   2 -34   2   44.79   22.03
  -2 -34  -2   20.64   22.97
  -2 -34  -3  499.39  158.24
   2  34   4  156.96   41.61
  -2 -34  -4  204.35   51.93
  -2 -34  -5  526.66  222.85
   2  36  -5   61.79   46.63
   2 -36  -5  143.46   51.45
   2  36  -4  192.57   76.22
   2 -36  -4  119.69   72.91
   2  36  -3  -18.88   24.54
   2 -36  -3   45.59   18.77
   2  36  -2  380.98   87.32
   2 -36  -2  475.23  105.70
   2  36  -1   32.54   14.31
   2 -36  -1   55.47   21.11
   2  36   0  838.93  180.72
   2 -36   0 1431.19  131.41
   2  36   1   11.35   13.60
   2 -36   1   29.64   18.60
  -2 -36  -1   27.99   21.70
  -2  36  -2 1756.35  153.09
  -2 -36  -2 1894.52  175.47
   2  36   3  171.66   41.61
  -2  36  -3   98.00   43.39
  -2 -36  -3  125.07   49.46
  -2 -36  -4  364.47  171.87
   2 -38  -3  131.92   70.25
   2  38  -2  133.78   63.00
   2 -38  -1   50.28   33.19
   2  38   0   23.66   20.23
  -2  38  -1  201.28   55.21
   2  38   1   92.72   30.95
   2  38   2   84.43   31.19
  -2  38  -3  347.32  108.23
  -2 -38  -3  163.18  100.71
   3  -1 -12   29.07   15.27
  -3  -1  12   -2.30   45.81
  -3   1  10  561.33  143.08
  -3  -1  10  555.53  135.15
   3   1  -9 4411.81  339.60
  -3   1   9 3352.61  394.54
   3  -1  -9 4194.30  324.40
  -3  -1   9 3821.23  390.50
   3   1  -8 5369.10  437.48
  -3   1   8 5933.98  472.50
   3   1  -8 6214.73  487.41
   3  -1  -8 5677.93  446.99
   3  -1  -8 4999.74  439.21
  -3  -1   8 5971.11  479.16
   3   1  -7 2104.36  236.66
  -3   1   7 2349.01  128.67
   3   1  -7 2561.23  129.13
   3   1  -7 2125.15  114.59
   3  -1  -7 2529.08  130.74
   3  -1  -7 1901.17  280.90
  -3  -1   7 2451.58  136.90
   3   1  -6 1398.41   79.65
  -3   1   6 1618.77   83.34
   3   1  -6 1649.16   66.43
   3   1  -6 1468.46   71.98
   3  -1  -6 1090.02  227.81
  -3  -1   6 1649.60   94.87
   3  -1  -6 1628.19  113.12
   3  -1  -6 1272.11  173.67
   3   1  -5  222.86   57.35
   3   1  -5  319.48   51.55
   3   1  -5  348.15   58.94
  -3   1   5  307.06   67.65
   3  -1  -5  237.80   31.28
  -3  -1   5  339.61   70.74
   3  -1  -5  276.37   49.85
   3  -1  -5  237.89   56.64
   3   1  -4   68.16   22.24
   3   1  -4   59.03   28.35
   3   1  -4   48.29   12.62
  -3   1   4   91.14   18.29
   3  -1  -4  165.61   41.44
  -3  -1   4   20.15   10.21
   3  -1  -4   88.89   22.06
   3  -1  -4   85.91   21.22
  -3   1   324336.89  530.14
   3   1  -325542.80  533.29
   3   1  -325085.70  529.02
  -3  -1   325595.09  558.78
   3  -1  -325325.80  524.36
   3  -1  -322602.65  483.06
  -3   1   231317.85  656.94
   3   1  -235015.28  711.16
  -3  -1   234342.80  714.50
   3  -1  -234927.03  708.12
   3   1  -119193.40  398.50
  -3   1   118022.84  367.73
   3   1  -117357.13  356.07
   3  -1  -115492.54  325.09
   3  -1  -116116.63  329.47
  -3  -1   118822.30  385.26
   3   1   0  478.10   33.03
  -3   1   0  546.07   39.55
  -3   1   0  581.60   39.13
   3   1   0  625.93   44.12
   3  -1   0  531.30   38.06
  -3  -1   0  428.20   34.91
   3  -1   0  544.96   44.96
  -3  -1   0  669.34   47.43
   3   1   1 2581.26   63.56
  -3   1  -1 2778.72   73.62
  -3   1  -1 2635.12   66.57
   3   1   1 2905.77   78.96
   3  -1   1 2617.27   65.35
   3  -1   1 2681.43   75.66
  -3  -1  -1 2702.12   85.27
  -3  -1  -1 2498.38   65.83
  -3   1  -2  479.87   43.39
  -3   1  -2  507.35   39.50
   3   1   2  492.32   38.85
   3   1   2  558.84   79.05
   3  -1   2  451.87   33.08
   3  -1   2  518.53   82.14
  -3  -1  -2  410.91   36.11
  -3  -1  -2  501.12   38.19
  -3   1  -3 7702.92  152.01
   3   1   3 8415.44  162.68
   3   1   3 8827.51  192.98
   3  -1   3 8056.63  156.26
   3  -1   3 8667.90  188.02
  -3  -1  -3 8622.87  169.39
  -3  -1  -3 8605.32  174.63
  -3   1  -4 2702.46  104.67
  -3   1  -4 2973.45   96.52
   3   1   4 3248.74  126.33
   3   1   4 2940.39   96.91
   3  -1   4 3023.91  121.30
   3  -1   4 2981.48   97.27
  -3  -1  -4 2981.84  105.18
  -3  -1  -4 2906.60   96.71
  -3   1  -514043.25  454.97
  -3   1  -514802.55 1345.47
   3   1   514331.62  455.13
   3   1   514745.56 1345.70
   3  -1   514636.20 1331.20
   3  -1   514685.82 1339.93
  -3  -1  -514387.21  463.54
  -3  -1  -515114.61 1375.50
  -3   1  -6  883.23  108.34
   3   1   6  652.77   48.26
   3   1   6  886.95  160.85
  -3  -1  -6  909.70   95.70
   3  -1   6  800.61   52.50
   3  -1   6  979.08  122.83
   3   1   7  990.37  208.87
  -3   1  -7  963.74  126.04
   3  -1   7  602.81  111.09
  -3  -1  -7  925.15   96.41
   3  -1   7  848.85  100.40
   3   1   8 1419.54  224.70
  -3   1  -8 1245.33  112.24
   3  -1   8 1273.71  266.72
  -3  -1  -8 1501.91  112.34
   3   1   9 1346.16  201.06
  -3   1  -9 1361.97  149.55
   3  -1   9 1539.60  164.05
  -3  -1  -9 1415.50  137.43
   3   1  10  635.93  232.54
  -3  -1 -10  473.72  155.99
   3  -1  10  540.95  128.18
  -3   1 -11  585.26  111.82
   3  -1  11  442.38  187.25
  -3   3  12  542.48  200.00
  -3  -3  12  381.86  160.76
  -3   3  11  395.30   50.68
  -3  -3  11  333.46   71.78
   3  -3 -10  244.00   61.31
  -3  -3  10  143.09   34.66
   3   3  -9 1543.32  124.28
  -3   3   9 1367.73  166.28
   3  -3  -9 1529.50  191.43
  -3  -3   9 1727.52  262.41
   3   3  -8  224.07   60.73
   3   3  -8  499.85   97.75
  -3   3   8  505.81   89.41
   3  -3  -8  452.39  113.27
  -3  -3   8  517.36   92.90
   3  -3  -8  326.75   59.41
   3   3  -7 1050.51  159.29
   3   3  -7  925.32  140.02
  -3   3   7  992.61  147.42
  -3  -3   7 1268.25  299.44
   3  -3  -7  919.87  159.75
   3  -3  -7  636.16  135.13
   3   3  -6  723.88   72.12
   3   3  -6  615.62  123.03
   3   3  -6  658.40   84.12
  -3   3   6  881.00  160.16
   3  -3  -6  753.50   83.23
  -3  -3   6  642.17  127.63
   3  -3  -6  628.98  118.29
   3  -3  -6  586.00   92.88
   3   3  -5 3162.00  117.57
   3   3  -5 2768.20  107.52
   3   3  -5 2971.50  113.30
  -3   3   5 3080.70  112.21
   3  -3  -5 2989.13  107.60
  -3  -3   5 3014.58  129.04
   3  -3  -5 3372.94  251.55
   3  -3  -5 2940.73  115.99
  -3   3   4 2499.93   66.98
   3   3  -4 2583.01   78.11
   3   3  -4 2397.94   79.33
   3  -3  -4 2457.34   62.68
   3  -3  -4 2619.79   96.86
  -3  -3   4 2567.86   90.00
   3  -3  -4 2535.05   65.75
  -3   3   3 3828.58  138.26
   3   3  -3 3987.81  110.55
  -3  -3   3 3978.93  185.03
   3  -3  -3 3631.82   85.79
  -3   3   2  728.58   74.69
   3   3  -2  780.37   50.05
   3   3  -2  769.26   50.26
  -3  -3   2 1050.58  160.36
   3  -3  -2  756.45   45.42
   3  -3  -2  711.35   65.69
  -3   3   1  204.30   44.54
  -3   3   1  218.07   22.14
   3   3  -1  285.24   45.85
   3   3  -1  305.55   47.76
   3  -3  -1  308.70   44.66
   3  -3  -1  277.64   34.67
  -3  -3   1  297.87   40.51
  -3  -3   1  226.85   27.30
   3   3   0 6159.98  133.56
   3  -3   0 6181.54  138.55
  -3  -3   0 5783.30  127.43
   3  -3   0 5973.22  131.71
  -3  -3   0 5763.84  124.46
  -3   3  -1  252.42   50.29
   3   3   1  174.77   27.20
  -3   3  -1  205.71   25.72
   3   3   1  327.41   58.39
   3  -3   1  285.70   37.73
  -3  -3  -1  246.51   24.88
  -3  -3  -1  236.41   26.68
   3  -3   1  265.93   47.53
  -3   3  -219177.51  397.70
   3   3   219077.84  396.15
   3   3   220823.38  438.71
  -3   3  -218317.36  387.37
   3  -3   220332.80  420.05
   3  -3   220144.46  428.11
  -3  -3  -220282.91  420.88
  -3  -3  -218128.18  379.58
  -3   3  -313366.92  249.64
   3   3   311950.60  236.32
   3   3   313418.02  252.66
  -3   3  -311833.88  232.10
   3  -3   312583.99  233.56
   3  -3   312430.35  257.39
  -3  -3  -312621.28  239.13
  -3  -3  -313691.26  270.38
  -3   3  -4 4205.89  131.27
   3   3   4 3986.96  142.83
   3   3   4 3918.52  125.58
  -3   3  -4 3681.33  128.87
   3  -3   4 3879.14  121.39
   3  -3   4 3536.39  127.42
  -3  -3  -4 4059.44  130.30
  -3  -3  -4 4020.32  133.57
  -3   3  -5 1433.90   58.39
  -3   3  -5 1556.62   76.55
   3   3   5 1490.59   64.71
   3   3   5 1427.07   78.00
   3  -3   5 1485.72  142.75
  -3  -3  -5 1506.98   67.64
  -3  -3  -5 1531.46   76.44
   3  -3   5 1740.36  163.93
  -3   3  -6  281.02   52.30
   3   3   6  216.69   33.26
   3   3   6  297.53   57.39
  -3  -3  -6  287.48   32.82
   3  -3   6  229.79   27.71
   3  -3   6  251.48   49.53
  -3   3  -7   11.75   15.69
   3   3   7    2.42   34.61
  -3  -3  -7   11.20   14.92
   3  -3   7   39.94   17.52
   3  -3   7   15.99   43.80
  -3   3  -8  564.88  131.42
   3   3   8  669.42  109.45
  -3  -3  -8  485.33  114.22
   3  -3   8  751.98  134.15
  -3   3  -9 1369.46   92.58
   3   3   9 1024.87   97.67
  -3  -3  -9  967.06  203.29
   3  -3   9 1289.26  284.37
   3   3  10  868.51  148.05
  -3  -3 -10  884.41  141.89
   3  -3  10  704.41  213.76
  -3   3 -11  270.71   48.56
   3   3  11  238.66   64.50
  -3  -3 -11  175.96   62.66
   3  -3  11  204.03  121.60
   3  -5 -11  203.10   88.79
   3   5 -10   99.11   28.74
  -3   5  10   71.09   29.02
   3  -5 -10  139.10   56.75
  -3  -5  10  109.49   57.46
   3   5  -9   48.65   34.59
   3   5  -9   96.82   37.15
  -3   5   9   59.09   44.21
   3  -5  -9  137.91   41.85
  -3  -5   9   72.51   35.26
   3   5  -8   38.10   31.94
   3   5  -8    8.16    7.70
  -3   5   8   31.83   25.72
   3  -5  -8   18.81   25.35
  -3  -5   8   55.96   27.29
   3  -5  -8    2.29   17.43
   3   5  -7 2058.63  132.00
   3   5  -7 2394.57  139.95
  -3   5   7 2622.92  161.07
   3  -5  -7 2658.23  160.66
  -3  -5   7 2352.59  294.80
   3  -5  -7 2106.43  146.53
   3   5  -6 1455.12   79.48
   3   5  -6 1325.35  137.06
   3   5  -6 1287.31  153.56
  -3   5   6 1448.09   86.27
   3  -5  -6 1529.37   91.16
  -3  -5   6 1547.28  205.31
   3  -5  -6 1333.56  196.04
   3  -5  -6 1698.27  119.84
   3   5  -5 2489.13  102.72
   3   5  -5 2499.43   98.14
   3   5  -5 2488.63   84.98
  -3   5   5 2480.11   91.90
   3  -5  -5 2222.37  136.79
  -3  -5   5 2478.48  116.76
   3  -5  -5 2623.04   99.83
   3  -5  -5 2581.40  144.48
   3   5  -4  690.89  114.99
   3   5  -4  713.70   92.04
  -3   5   4  639.29   64.62
   3  -5  -4  583.37   47.64
   3  -5  -4  591.02   96.38
   3  -5  -4  562.49   44.60
  -3   5   3  289.47   54.11
   3   5  -3  306.14   45.82
   3   5  -3  288.83   45.20
   3  -5  -3  370.13   70.86
  -3  -5   3  407.32   68.54
   3  -5  -3  365.33   46.68
  -3   5   2 2344.11  171.40
   3   5  -2 2132.93  124.18
   3   5  -2 2074.80  128.32
   3  -5  -2 2011.09  146.12
  -3  -5   2 1870.95  120.73
   3  -5  -2 2212.31  128.69
   3  -5  -2 2044.76  117.25
  -3   5   1 4061.04   86.74
   3   5  -1 4115.93   91.71
   3   5  -1 4044.25   93.93
   3  -5  -1 3936.12  109.92
   3  -5  -1 3810.99   83.96
  -3  -5   1 3592.01   81.67
  -3  -5   1 3841.80   87.59
  -3   5   0  810.10   96.78
  -3   5   0  716.67   48.32
   3   5   0  767.69   50.43
   3   5   0  666.61   44.10
   3  -5   0  631.16   45.34
   3  -5   0  801.12   66.61
  -3  -5   0  667.85   43.62
  -3  -5   0  720.74   46.37
  -3   5  -1 8943.34  198.56
   3   5   1 9699.93  207.17
   3   5   1 9256.51  200.23
  -3  -5  -1 9547.54  204.45
   3  -5   1 9529.15  211.56
  -3   5  -2 4247.78  111.65
   3   5   2 4147.10   99.94
   3   5   2 4321.44  110.63
   3  -5   2 3828.31  105.30
   3  -5   2 3795.53   88.54
  -3  -5  -2 3849.60   93.63
  -3   5  -3 2141.46  141.06
  -3   5  -3 2397.03   74.96
   3   5   3 2103.58  139.53
   3   5   3 2134.69  149.85
   3  -5   3 2125.21  138.79
  -3  -5  -3 2184.88  185.81
   3  -5   3 2184.83  191.10
  -3  -5  -3 2032.84  135.94
  -3   5  -4  744.87   81.77
   3   5   4  651.35   68.40
  -3   5  -4  803.22  130.28
   3   5   4  751.67  101.64
  -3  -5  -4  888.90   81.96
   3  -5   4  811.02   72.38
  -3  -5  -4  849.95   82.28
   3  -5   4  978.73  156.46
  -3   5  -5 1071.10  103.56
   3   5   5  990.77   97.27
   3   5   5 1183.82  124.11
  -3   5  -5  871.63  178.06
  -3  -5  -5 1024.18  106.08
   3  -5   5 1053.22  126.50
   3  -5   5 1133.77  138.19
  -3  -5  -5 1055.39  107.42
  -3   5  -6 4521.38  215.52
   3   5   6 4350.60  221.18
   3  -5   6 4151.46  204.98
   3  -5   6 4399.66  230.14
  -3  -5  -6 4496.90  216.99
  -3   5  -7 3274.66  235.68
   3   5   7 3031.22  235.70
   3  -5   7 2954.59  215.31
   3  -5   7 3526.16  363.56
  -3  -5  -7 3203.71  234.07
  -3   5  -8  155.48   38.06
   3   5   8  207.23   58.45
  -3  -5  -8  147.84   43.89
   3  -5   8  111.77   52.20
  -3   5  -9  681.98  122.98
   3   5   9 1056.45  222.82
  -3  -5  -9  934.59   62.97
   3  -5   9 1042.17  100.75
  -3   5 -10   65.68   25.07
   3   5  10  140.01   61.58
   3  -5  10  165.68   66.91
  -3   5 -11    7.32    9.32
   3   5  11   70.59   61.09
  -3  -5 -11   43.54   33.51
   3  -5  11   44.23   58.37
  -3   7  11 1443.28  324.18
   3  -7 -11 2098.42  208.96
  -3  -7  11 1826.53  341.98
  -3   7  10   59.33   26.79
   3  -7 -10  137.12   34.29
   3   7  -9  170.00   42.04
  -3   7   9  243.10   51.98
   3  -7  -9  175.73   59.54
  -3  -7   9  360.65   91.95
   3   7  -8 1227.64  174.42
  -3   7   8  828.72  170.35
   3  -7  -8 1227.53  214.56
  -3  -7   8 1269.23  262.60
   3  -7  -8 1040.46  151.88
   3   7  -7 4169.66  245.14
   3   7  -7 4939.14  279.53
  -3   7   7 4480.63  262.54
   3  -7  -7 4752.38  293.17
  -3  -7   7 5319.55  318.12
   3  -7  -7 4130.06  239.18
   3   7  -6  254.37   37.03
   3   7  -6  330.33   67.33
   3   7  -6  436.80   37.19
  -3   7   6  524.72   72.62
   3  -7  -6  376.23  121.83
  -3  -7   6  504.32   79.18
   3  -7  -6  395.63   40.71
   3  -7  -6  368.89   82.46
   3   7  -514009.94  446.04
   3   7  -511734.34  366.90
  -3   7   511366.69  362.10
   3  -7  -511441.40  397.84
   3  -7  -511332.94  366.82
  -3  -7   511281.42  397.99
   3  -7  -512181.37  386.14
   3   7  -4 6152.45  177.59
   3   7  -4 6187.42  180.90
  -3   7   4 6556.08  193.30
   3   7  -4 6570.18  208.70
   3  -7  -4 6784.71  341.43
   3  -7  -4 6357.53  194.56
   3  -7  -4 6948.85  204.51
  -3   7   3 2298.15  108.65
   3   7  -3 2149.99  147.99
   3   7  -3 2184.29  181.75
  -3  -7   3 2108.62  155.65
   3  -7  -3 2399.24  101.64
   3  -7  -3 2501.91   51.35
   3  -7  -3 2272.26   42.54
  -3   7   2  462.75   68.68
   3   7  -2  284.70   26.35
   3   7  -2  344.05   30.08
  -3  -7   2  520.17   54.08
   3  -7  -2  421.38  103.12
  -3   7   120320.59  455.01
  -3   7   119596.37  399.48
   3   7  -118189.73  373.63
   3   7  -118578.32  384.83
   3  -7  -117528.64  386.25
   3  -7  -117738.02  363.04
  -3  -7   119331.62  397.36
  -3  -7   118137.88  375.90
  -3   7   0 3935.92  142.99
   3   7   0 3968.07   90.40
   3   7   0 3893.75   90.81
  -3   7   0 3631.78   86.02
   3  -7   0 3975.93   95.85
  -3  -7   0 4061.17   93.28
  -3  -7   0 4241.12   97.18
  -3   7  -117433.27  377.82
   3   7   117640.81  367.77
   3   7   117991.72  378.03
  -3  -7  -117511.35  365.21
   3  -7   118306.27  384.28
   3  -7   116561.46  353.72
  -3  -7  -116591.28  344.86
  -3   7  -2 5322.71  115.54
  -3   7  -2 5495.41  124.92
   3   7   2 5328.24  111.98
   3  -7   2 5013.60  101.34
   3  -7   2 5333.58  133.13
  -3  -7  -2 5169.14  108.71
  -3   7  -3 5419.22  132.64
   3   7   3 5406.89  116.91
   3   7   3 5652.09  131.39
   3  -7   3 5572.71  112.40
   3  -7   3 5690.76  139.93
  -3  -7  -3 5311.88  116.56
  -3  -7  -3 5402.05  115.16
  -3   7  -412623.66  364.76
  -3   7  -413039.40  394.00
   3   7   412910.45  378.27
   3   7   412445.70  371.66
   3  -7   412907.98  372.18
   3  -7   413315.15  404.10
  -3  -7  -412931.98  379.61
  -3  -7  -411884.18  379.84
  -3   7  -5 7046.33  229.80
   3   7   5 7291.37  255.73
   3   7   5 6639.79  223.01
  -3   7  -5 6730.04  238.74
  -3  -7  -5 6950.81  233.03
   3  -7   5 6975.66  257.36
   3  -7   5 6702.13  222.20
  -3  -7  -5 6032.51  203.84
  -3   7  -6 1904.92   97.31
   3   7   6 1802.28  109.30
   3  -7   6 1798.09   92.04
   3  -7   6 1829.44  114.09
  -3  -7  -6 1726.52   95.91
  -3   7  -712990.97 2312.12
   3   7   712285.79  875.13
  -3  -7  -712239.46  860.91
   3  -7   712704.45 2267.47
  -3   7  -8  172.07   60.77
   3   7   8  281.49   63.54
   3  -7   8  181.41   43.67
   3  -7   8  317.13   78.93
  -3  -7  -8  209.90   54.37
  -3   7  -9  193.80   44.36
   3   7   9  240.74   63.01
  -3  -7  -9  148.59   35.82
   3  -7   9  183.39   54.74
  -3   7 -10   53.68   27.12
   3   7  10   55.14   46.71
  -3  -7 -10  110.38   32.18
   3  -7  10  107.98   57.40
   3   7  11 1730.78  328.42
  -3  -7 -11 1869.71  317.70
   3  -9 -11 4218.18  363.83
  -3  -9  11 4633.62  151.07
   3  -9 -10  139.90   60.20
  -3  -9  10  146.73   64.46
   3   9  -9  691.33   76.15
  -3   9   9  777.14  114.57
   3  -9  -9  858.43  110.11
  -3  -9   9  732.32  123.72
   3   9  -8 1043.74   73.33
  -3   9   8  998.52  139.08
   3  -9  -8 1305.47  105.56
  -3  -9   8 1186.27  144.02
   3  -9  -8  621.01  127.36
   3   9  -7 3992.43  246.64
   3   9  -7 3602.48  204.02
  -3   9   7 3163.29  197.03
   3  -9  -7 3585.82  215.26
  -3  -9   7 3724.02  236.02
   3  -9  -7 3228.83  189.06
   3   9  -6  786.50  114.66
   3   9  -6 1121.69  196.74
  -3   9   6 1178.42  211.47
   3  -9  -6 1208.86  216.08
  -3  -9   6 1476.14  244.05
   3  -9  -6 1142.40  211.44
   3   9  -515415.93  503.03
   3   9  -517458.96  544.89
   3   9  -515699.05  488.92
  -3   9   515866.19  500.37
   3  -9  -515765.29  540.57
  -3  -9   515597.65  511.72
   3  -9  -515819.01  514.41
   3  -9  -516489.40  517.63
   3   9  -4  254.02   28.50
   3   9  -4  265.52   28.18
  -3   9   4  266.30   41.51
   3   9  -4  280.49   65.32
   3  -9  -4  444.90   81.85
   3  -9  -4  392.85   48.70
   3  -9  -4  253.66   25.05
   3   9  -3 2584.64  113.67
   3   9  -3 2711.70   53.35
  -3  -9   3 2666.82   67.83
   3  -9  -3 3002.64  115.18
  -3   9   2 7728.38  214.48
   3   9  -2 7576.04  139.34
   3   9  -2 7496.33  147.97
  -3   9   1 2441.00  187.17
  -3   9   1 2232.51  129.95
   3   9  -1 2386.14  139.81
   3   9  -1 2523.36   66.92
   3  -9  -1 2588.27   97.93
   3  -9  -1 2274.38  132.34
  -3  -9   1 2501.72   60.93
  -3   9   0 1488.70  113.44
  -3   9   0 1737.87  114.40
   3   9   0 1782.38  107.22
   3   9   0 1565.11   94.91
   3  -9   0 2335.58  189.04
   3  -9   0 1803.40  125.20
  -3  -9   0 1790.21  107.62
  -3  -9   0 1758.99  105.44
  -3   9  -139246.91 3240.98
  -3   9  -137704.22 3110.88
   3   9   137891.96 3124.61
   3   9   140399.56 3331.43
   3  -9   136763.73  658.26
   3  -9   138817.64 3202.62
  -3  -9  -132363.16  664.82
  -3  -9  -138196.56 3149.09
  -3   9  -2   29.83   12.74
  -3   9  -2    6.36   20.71
   3   9   2   46.35   29.87
   3   9   2   37.78   17.13
   3  -9   2   26.09   10.17
   3  -9   2   57.69   29.37
  -3  -9  -2   48.46   24.12
  -3  -9  -2   12.91   15.45
  -3   9  -3  746.69  100.60
  -3   9  -3  755.67   81.00
   3   9   3  569.02   56.80
   3   9   3  656.74   67.98
   3  -9   3  768.36   88.79
   3  -9   3  719.65   73.48
  -3  -9  -3  592.77   55.75
  -3  -9  -3  788.91   93.83
  -3   9  -4  609.75   77.75
  -3   9  -4  414.79   70.20
   3   9   4  473.18   69.94
   3   9   4  527.13   95.59
  -3  -9  -4  561.21   44.17
   3  -9   4  425.75   52.89
   3  -9   4  514.80   36.96
  -3  -9  -4  592.68   87.89
  -3   9  -5  267.60   41.33
   3   9   5  185.59   31.67
  -3  -9  -5  181.47   27.96
   3  -9   5  151.36   39.14
   3  -9   5  235.94   25.34
  -3  -9  -5  214.93   35.79
   3   9   6   76.58   37.67
   3  -9   6   32.50   13.47
   3  -9   6   64.27   26.86
  -3  -9  -6   45.83   31.40
  -3   9  -7 4957.48  389.66
   3   9   7 5453.60  438.18
   3  -9   7 4693.19  368.98
   3  -9   7 5705.43  464.84
  -3  -9  -7 5218.12  414.06
  -3   9  -8   43.65   21.03
   3   9   8   74.41   42.06
   3  -9   8   21.16   16.45
   3  -9   8   78.36   48.65
  -3  -9  -8  122.40   38.05
  -3   9  -9   30.52   20.05
   3   9   9   38.83   27.59
  -3  -9  -9   27.03   25.52
   3  -9   9  120.01   52.26
  -3   9 -10  132.34   46.03
  -3  -9 -10  205.69   36.56
   3  -9  10  292.24   75.88
   3   9  11  172.20   88.04
  -3  -9 -11  168.35   47.59
   3  -9  11  141.88   45.55
   3 -11 -11   84.51   32.60
  -3 -11  11   41.08   18.29
  -3  11  10   44.36   20.46
   3 -11 -10  116.94   42.56
  -3 -11  10   50.41   36.29
   3  11  -9   12.81    7.01
  -3  11   9   37.46   27.37
   3 -11  -9   68.85   36.94
  -3 -11   9  193.14   56.63
   3  11  -8 2948.41  194.94
  -3  11   8 3439.23  238.34
   3 -11  -8 3704.38  258.50
  -3 -11   8 4239.88  468.38
   3 -11  -8 3482.53  237.52
   3  11  -7 1608.09  168.87
   3  11  -7 1830.00  128.61
  -3  11   7 2160.81  169.31
   3 -11  -7 2352.18  217.14
  -3 -11   7 2534.45  318.38
   3 -11  -7 2397.57  184.42
  -3  11   6 5692.22  268.18
   3 -11  -6 6141.25  295.61
  -3 -11   6 5933.27  294.90
   3 -11  -6 6762.04  313.98
  -3  11   5 5086.43  166.19
   3 -11  -5 4812.46  219.51
   3 -11  -5 5099.05  181.64
   3 -11  -5 4899.03  156.64
   3  11  -4   27.89   19.16
   3 -11  -4   62.39   32.90
   3 -11  -4   44.15   28.32
   3 -11  -4   26.88    5.31
   3  11  -3 1003.45  173.16
   3  11  -3 1118.88   94.05
   3 -11  -3 1177.74  171.19
   3 -11  -3  924.10   83.95
  -3 -11   3 1422.24  123.41
  -3  11   2 3464.77  415.69
   3  11  -2 2850.71   70.17
   3  11  -2 3000.23   62.22
  -3 -11   2 2899.58   59.61
   3 -11  -2 3081.35  149.14
  -3  11   1  380.54   90.30
  -3  11   1  266.34   45.09
   3  11  -1  339.00   56.95
   3  11  -1  291.99   53.12
   3 -11  -1  274.50   69.41
   3 -11  -1  288.95   40.35
  -3 -11   1  360.76   49.44
  -3  11   0  304.62   84.38
  -3  11   0  366.05   63.80
   3  11   0  339.83   30.56
   3  11   0  332.66   39.30
   3 -11   0  456.61   53.31
   3 -11   0  377.55   37.07
  -3 -11   0  322.91   28.47
  -3 -11   0  399.27   43.62
  -3  11  -1 4550.41  123.02
  -3  11  -1 4941.08  112.25
   3  11   1 5283.50  111.37
   3  11   1 5659.25  129.32
   3 -11   1 4443.56  116.88
   3 -11   1 4948.50  116.44
  -3 -11  -1 5019.11  106.31
  -3 -11  -1 5392.11  110.73
  -3  11  -213498.77  278.00
  -3  11  -211351.40  339.43
   3  11   211796.04  227.39
   3  11   212123.83  358.62
   3 -11   213269.86  266.41
  -3 -11  -211918.41  237.87
  -3 -11  -211957.91  224.49
  -3  11  -3  456.14   65.66
  -3  11  -3  371.72   88.16
   3  11   3  582.94   80.89
   3  11   3  613.12  104.51
   3 -11   3  541.04   62.69
   3 -11   3  539.40   63.48
  -3 -11  -3  449.54   46.11
  -3 -11  -3  519.37   85.40
  -3  11  -4 1227.21  156.72
  -3  11  -4 1016.84  152.47
   3  11   4 1385.70   63.32
   3  11   4 1355.75   88.70
  -3 -11  -4 1427.72   70.55
   3 -11   4 1270.57  132.31
   3 -11   4 1235.84  124.78
  -3 -11  -4 1205.63  115.71
  -3  11  -5  849.38  151.36
   3  11   5  807.35  114.85
   3 -11   5  766.93   74.75
   3 -11   5  981.82  161.64
  -3 -11  -5  729.79   52.75
  -3 -11  -5  698.73   87.56
   3  11   6  829.06   95.69
   3 -11   6  759.52  111.37
   3 -11   6  959.26  179.40
  -3 -11  -6  794.15   99.78
  -3  11  -7   68.67   26.36
   3  11   7   86.21   42.49
   3 -11   7   11.50   11.48
   3 -11   7   65.85   40.52
  -3 -11  -7   46.67   25.35
  -3  11  -8  597.17  104.90
   3  11   8  803.61  163.73
  -3 -11  -8  518.76  162.26
   3 -11   8  869.72  116.19
   3  11   9  143.48   63.14
  -3 -11  -9   26.86   29.08
   3 -11   9  122.87   77.71
   3  11  10  228.06   66.43
  -3 -11 -10   83.07   56.49
   3 -11  10   54.72   52.46
  -3 -11 -11   15.80   46.32
   3 -11  11  115.71   76.85
   3 -13 -11  122.09   48.21
  -3 -13  11   40.62   40.70
   3 -13 -10   20.12   34.35
  -3 -13  10   33.41   25.85
  -3  13   9 2139.14  172.50
   3 -13  -9 2512.29  180.49
  -3 -13   9 2039.89  337.77
  -3  13   8  416.76   85.49
   3 -13  -8  462.22   75.86
  -3 -13   8  285.19   86.78
   3 -13  -8  221.73   38.70
  -3  13   7 4662.10  370.11
   3 -13  -7 5223.29  417.43
  -3 -13   7 4802.03  476.84
   3 -13  -7 4325.72  338.51
  -3  13   6 3114.51  180.25
   3 -13  -6 3374.59  210.54
   3 -13  -6 3195.68  181.60
  -3  13   5  193.20   24.46
   3 -13  -5  248.05   43.39
   3 -13  -5  184.57   20.37
   3  13  -4  245.80   51.18
   3 -13  -4  417.52  103.44
   3 -13  -4  328.90   43.47
   3  13  -314475.01  448.86
   3 -13  -314447.39  492.35
  -3 -13   313042.33  406.00
   3 -13  -313432.00  429.75
   3  13  -2 5521.86  161.10
  -3  13   2 5842.24  241.97
  -3  13   2 5622.20  160.84
   3  13  -2 5520.75  169.28
   3  13  -2 5408.76  178.59
  -3 -13   2 6030.84  175.38
   3 -13  -2 6110.40  217.83
  -3  13   112557.48  289.98
   3  13  -112300.93  233.71
   3  13  -112458.74  229.67
  -3  13   111504.56  212.54
  -3 -13   113022.84  239.26
  -3  13   0  309.92   64.37
  -3  13   0  279.65   29.75
   3  13   0  241.18   33.79
   3  13   0  211.93   41.43
   3 -13   0  350.39   80.83
   3 -13   0  258.16   41.70
  -3 -13   0  297.71   52.68
  -3 -13   0  203.76   25.65
  -3  13  -1 3844.87  156.41
  -3  13  -1 3295.69  114.48
   3  13   1 3347.29  107.78
   3  13   1 3354.70  108.02
   3 -13   1 3043.48  105.94
  -3 -13  -1 3469.90  111.54
  -3 -13  -1 3485.45  112.85
  -3  13  -2 1427.33  154.92
  -3  13  -2 1470.13  104.47
   3  13   2 1410.84  114.71
   3  13   2 1458.93   96.76
   3 -13   2 1638.68  105.58
   3 -13   2 1351.32   96.49
  -3 -13  -2 1604.66   67.85
  -3 -13  -2 1408.70   90.21
  -3  13  -3 3034.74  174.09
  -3  13  -3 2761.70  110.74
   3  13   3 2975.20  114.54
   3  13   3 2565.27   99.35
   3 -13   3 2579.58  102.97
   3 -13   3 2573.23  115.98
  -3 -13  -3 2894.44  112.34
  -3 -13  -3 2777.13   99.19
  -3  13  -4  432.12   68.54
  -3  13  -4  202.86   64.28
   3  13   4  343.76   56.21
   3 -13   4  311.19   51.35
   3 -13   4  487.40   42.56
  -3 -13  -4  671.04  112.95
  -3 -13  -4  441.74   76.49
  -3  13  -5 5861.43  295.94
   3  13   5 5797.01  280.86
  -3 -13  -5 6686.53  319.20
   3 -13   5 6243.42  314.50
   3 -13   5 5935.61  279.26
  -3  13  -6  586.23  111.63
   3  13   6  915.85  178.55
  -3 -13  -6  718.17   90.51
   3 -13   6  770.09   99.57
  -3  13  -7  392.77   80.85
   3  13   7  445.08   90.11
   3 -13   7  510.20   82.63
   3 -13   7  572.83  105.93
  -3 -13  -7  582.93  126.77
  -3  13  -8   28.67   18.67
   3  13   8  -18.67   36.19
  -3 -13  -8   40.48   34.40
   3 -13   8   69.55   41.86
  -3  13  -9 4482.76  405.37
   3  13   9 3582.61  335.93
  -3 -13  -9 4218.57  385.75
   3 -13   9 4806.58  456.38
  -3 -13 -10   29.51   31.25
   3 -13  10   54.79   51.55
  -3 -13 -11  744.95  141.69
   3 -13  11  703.39  194.45
   3 -15 -11  152.77   51.57
   3 -15 -10  643.32  213.08
  -3 -15  10  522.74  195.59
  -3  15   9 1411.60  149.10
   3 -15  -9 1469.10  172.05
  -3 -15   9 1011.11  291.29
  -3  15   8  535.93   67.74
   3 -15  -8  713.16   77.94
  -3  15   7  454.61   81.42
   3 -15  -7  588.95   99.04
   3 -15  -7  478.27   89.54
  -3  15   6  485.95   79.38
   3 -15  -6  621.01   97.30
   3 -15  -6  481.81   64.29
   3 -15  -5 3472.28  176.24
   3 -15  -5 3430.56  157.06
   3 -15  -4   43.06   28.37
   3  15  -3  778.67   48.75
   3  15  -3  595.54  121.28
   3 -15  -3  853.27   68.45
   3 -15  -3  916.80  154.79
  -3 -15   3  900.23   74.46
   3  15  -2  683.02  109.58
   3  15  -2  850.10   55.89
  -3  15   2  861.16   53.34
   3  15  -2  890.38  115.73
  -3  15   2  798.47   53.55
   3 -15  -2  840.14   64.00
  -3 -15   2  997.66   76.38
  -3  15   1 3438.60  251.20
  -3  15   1 3162.41  100.92
   3  15  -1 2949.71   99.23
   3  15  -1 3012.94   94.26
   3 -15  -1 2766.84  113.46
  -3 -15   1 3101.60   96.86
  -3  15   0 5053.07  240.51
  -3  15   0 5082.73  158.71
   3  15   0 5089.79  155.05
   3  15   0 5112.44  157.63
   3 -15   0 4727.69  166.14
   3 -15   0 4818.86  155.34
  -3 -15   0 5226.54  159.43
  -3 -15   0 5301.63  161.35
  -3  15  -1 1494.89  186.33
   3  15   1 1188.63  113.66
   3  15   1 1346.89   57.89
   3 -15   1 1624.35  145.41
   3 -15   1 1450.50   84.20
  -3 -15  -1 1345.46   56.18
  -3 -15  -1 1377.64   72.40
  -3  15  -2  532.24   74.42
  -3  15  -2  363.66   57.91
   3  15   2  300.46   59.04
   3  15   2  360.25   38.36
   3 -15   2  337.17   35.08
   3 -15   2  547.33  105.35
  -3 -15  -2  369.13   36.80
  -3 -15  -2  401.11   39.83
  -3  15  -3 7717.09  277.18
  -3  15  -3 7764.40  265.16
   3  15   3 6692.22  223.73
   3  15   3 7624.44  253.06
   3 -15   3 7703.26  247.78
   3 -15   3 8495.61  316.75
  -3 -15  -3 8662.76  286.23
  -3 -15  -3 8385.04  271.30
  -3  15  -4 1911.70  232.03
   3  15   4 2049.02  127.07
  -3 -15  -4 2072.02  123.44
   3 -15   4 2064.63  263.16
   3 -15   4 2411.63  161.29
  -3 -15  -4 1960.15  107.35
  -3  15  -5 8029.26  472.50
   3  15   5 6058.18  352.46
  -3 -15  -5 5500.09  320.06
   3 -15   5 6609.55  464.34
   3 -15   5 6508.12  367.04
  -3  15  -6  882.26  156.99
   3  15   6  724.62  135.18
   3 -15   6  609.30   88.75
   3 -15   6  530.85   94.25
  -3 -15  -6  747.40  119.07
  -3  15  -7 1098.80  138.90
   3  15   7 1534.17  276.06
   3 -15   7 1036.39  109.22
   3 -15   7 1534.16  267.70
  -3 -15  -7 1376.66  124.58
  -3  15  -8   44.78   16.60
   3  15   8   82.08   48.08
  -3 -15  -8  138.18   37.20
   3 -15   8  140.21   41.08
   3  15   9 1008.40  168.47
  -3 -15  -9  924.64  195.20
   3 -15   9  847.12  301.41
   3  15  10  274.99   71.82
  -3 -15 -10  333.08   79.24
   3 -15  10  113.93   67.92
   3 -17 -10  449.12  174.16
   3 -17  -9  146.20   59.61
  -3  17   8 6915.95  400.03
   3 -17  -8 7640.47  130.90
  -3  17   7  136.48   35.89
   3 -17  -7  292.52   75.16
  -3  17   6  298.42   57.50
   3 -17  -6  485.44   83.18
   3 -17  -6  332.95   56.39
   3 -17  -5   -1.84   27.97
   3 -17  -4 3246.95  220.19
   3  17  -3   52.33   22.37
  -3  17   3    4.56    3.28
   3 -17  -3    9.12   23.16
  -3 -17   3   10.19    4.84
   3  17  -2 5393.39  182.41
   3  17  -2 5306.09  194.38
   3  17  -2 5514.10  181.66
  -3  17   2 5442.87  172.44
  -3  17   2 5520.41  178.42
  -3 -17   2 5715.00  183.79
   3 -17  -2 5219.21  179.10
   3 -17  -2 5954.39  245.70
  -3  17   1  581.53   74.89
   3  17  -1  627.18   55.79
  -3  17   1  570.56   77.18
  -3 -17   1  726.02   66.33
   3 -17  -1  699.16  160.06
  -3  17   0 3366.48  258.12
  -3  17   0 3200.16  120.99
   3  17   0 3336.78  119.18
   3 -17   0 3206.61  119.58
   3 -17   0 3077.19  179.59
  -3 -17   0 3435.75  118.57
  -3  17  -1  135.40   52.54
  -3  17  -1   10.54   21.20
   3  17   1   53.45   18.39
   3  17   1   31.72   16.44
   3 -17   1   34.46   17.00
   3 -17   1   52.59   16.16
  -3 -17  -1   65.95   22.73
  -3 -17  -1   29.24   13.98
  -3  17  -2 2111.26  305.14
  -3  17  -2 2069.34   89.62
   3  17   2 2066.46   84.47
   3  17   2 2206.99   88.90
   3 -17   2 2061.27  123.46
   3 -17   2 2279.52  160.66
  -3 -17  -2 2184.74   84.98
  -3 -17  -2 2120.03   79.46
  -3  17  -3 2482.04  155.18
  -3  17  -3 1850.21  112.44
   3  17   3 1993.95  114.07
   3 -17   3 1900.70  117.67
   3 -17   3 1921.75  103.19
  -3 -17  -3 2001.27  118.72
  -3 -17  -3 1951.39  108.28
  -3  17  -4 8568.22  411.96
   3  17   410324.66  486.33
  -3 -17  -4 9816.05  461.03
   3 -17   4 9744.71  468.40
   3 -17   4 9372.35  431.78
  -3  17  -5   22.69   18.21
   3  17   5   82.42   35.16
  -3 -17  -5  127.88   39.95
   3 -17   5   68.45   33.91
   3 -17   5   -2.15    8.35
  -3  17  -6  132.41   42.80
   3  17   6  195.38   53.27
  -3 -17  -6  303.03   70.14
   3 -17   6  291.36   82.03
   3 -17   6  191.70   41.92
  -3  17  -7 1080.85  131.22
   3  17   7 1108.18  203.81
  -3 -17  -7 1109.90  104.50
   3 -17   7 1180.31  216.50
   3  17   8   72.21   35.47
  -3 -17  -8  123.52   44.34
   3 -17   8  124.28   53.34
   3  17   9  535.30  149.18
  -3 -17  -9  688.35  108.90
   3 -17   9  700.71  139.69
   3  17  10  811.18  203.14
  -3 -17 -10 1015.21  236.53
   3 -17  10 1051.99  226.94
   3 -19 -10   54.64   28.73
   3 -19  -9  112.34   39.15
   3 -19  -8  560.94   65.06
   3 -19  -7  115.21   53.17
   3 -19  -6  502.77   83.03
   3 -19  -5 4354.77  316.45
   3 -19  -4  518.90   89.48
  -3  19   3   99.25   25.62
  -3  19   3   91.83   17.22
   3  19  -3  204.60   47.63
  -3 -19   3  125.71   29.05
  -3 -19   3  152.22   32.91
   3 -19  -3  194.65   39.55
  -3  19   2   30.40   14.31
   3  19  -2   19.58    9.79
   3  19  -2   25.79   18.88
  -3  19   2   -0.91    3.88
  -3 -19   2   12.91   10.28
   3 -19  -2    6.63   22.26
  -3  19   1  111.43   22.03
  -3  19   1  114.38   21.11
   3  19  -1  122.54   21.36
   3  19  -1  133.61   30.91
   3 -19  -1   54.32   23.35
  -3 -19   1  189.07   30.59
   3 -19  -1  187.15   37.87
  -3  19   0 1506.95  233.26
  -3  19   0 1448.71   86.96
   3  19   0 1533.99   87.50
   3  19   0 1535.29   88.53
   3 -19   0 1472.36  101.30
  -3 -19   0 1596.97   89.49
  -3  19  -1  857.21  143.41
  -3  19  -1 1003.13  117.16
   3  19   1 1022.44   66.55
   3  19   1  914.47   60.18
   3 -19   1 1278.67  196.41
   3 -19   1 1195.58  155.60
  -3 -19  -1  987.88   63.47
  -3 -19  -1  961.47   73.66
  -3  19  -2  705.98  100.57
  -3  19  -2  417.03  120.83
   3  19   2  610.98   50.97
   3  19   2  833.47   85.30
   3 -19   2  528.92   93.20
   3 -19   2  884.91  132.48
  -3 -19  -2  825.89   66.30
  -3 -19  -2  736.59   79.73
  -3  19  -3   51.57   39.01
   3  19   3  122.92   32.55
  -3 -19  -3   36.12   24.24
   3 -19   3   59.38   41.19
   3 -19   3   17.42   10.33
  -3  19  -4   67.73   53.03
   3  19   4   10.40   15.88
  -3 -19  -4   21.88   28.25
   3 -19   4   28.65   30.34
  -3 -19  -4    3.13    7.05
   3  19   5  100.65   40.49
  -3 -19  -5   46.55   27.71
   3 -19   5   71.66   42.13
   3 -19   5    8.79    8.49
  -3  19  -6  508.17   91.81
   3  19   6  520.36  112.31
  -3 -19  -6  640.05  131.77
   3 -19   6  690.23  146.09
  -3  19  -7 1594.36  201.03
   3  19   7 2624.90  228.98
  -3 -19  -7 2478.02  161.47
   3 -19   7 2539.59  177.78
   3  19   8 1345.62  139.39
  -3 -19  -8  956.71  317.62
   3 -19   8 1057.35  220.19
   3  19   9   37.57   34.40
  -3 -19  -9   45.60   33.57
   3 -19   9   80.62   55.53
   3  19  10  283.91   91.52
  -3 -19 -10  243.31   73.43
   3 -19  10  143.21   63.51
   3 -21 -10   59.70   40.21
   3 -21  -9 1761.78  174.65
   3 -21  -8  752.43   96.97
   3 -21  -7 2305.26  161.62
   3 -21  -6  298.64   66.93
   3 -21  -5   79.36   45.95
   3 -21  -4  525.69   71.24
  -3  21   3 2432.86  139.91
  -3  21   3 2369.79  137.11
   3  21  -3 2406.21  145.74
  -3 -21   3 2256.25  170.42
  -3 -21   3 2535.48  147.99
   3 -21  -3 2573.30  159.58
  -3  21   2 3197.23  154.34
  -3  21   2 3101.10  145.22
   3  21  -2 3005.60  142.93
   3  21  -2 3177.43  157.86
  -3 -21   2 3474.45  164.16
   3 -21  -2 2986.96  152.71
   3  21  -1 2915.63  143.90
  -3  21   1 2818.72  139.91
   3  21  -1 2906.67  144.86
  -3  21   1 2948.44  139.81
  -3 -21   1 2942.79  142.62
   3 -21  -1 2857.68  145.85
   3 -21  -1 2392.67  181.99
   3  21   0 1350.13   76.22
  -3  21   0 1387.57   79.89
   3 -21   0 1372.77   75.88
  -3 -21   0 1295.28  228.40
  -3  21  -1 3276.69  255.08
   3  21   1 3418.90  166.65
  -3  21  -1 3649.20  184.23
   3 -21   1 3455.58  200.35
  -3 -21  -1 3556.64  181.18
  -3  21  -2  343.69   85.20
  -3  21  -2  337.24   48.30
   3  21   2  500.82   94.12
   3 -21   2  375.66   62.78
   3 -21   2  240.34   71.80
  -3 -21  -2  440.97   88.62
  -3 -21  -2  364.99   69.33
  -3  21  -3 3183.12  319.77
   3  21   3 2948.84  180.54
  -3 -21  -3 3626.81  215.48
   3 -21   3 3114.29  263.49
   3 -21   3 3710.72  216.07
  -3 -21  -3 2960.15  173.42
  -3  21  -4 2967.92  396.74
   3  21   4 2475.46  233.65
  -3 -21  -4 2617.82  225.94
   3 -21   4 2807.82  266.81
   3 -21   4 2627.04  208.15
   3  21   5 2947.61  321.16
  -3 -21  -5 2668.71  195.71
   3 -21   5 2839.60  268.26
   3 -21   5 2399.04  171.35
  -3  21  -6  194.50   53.11
   3  21   6  281.55   70.98
  -3 -21  -6  337.59   72.83
   3 -21   6  119.20   42.46
   3  21   7  459.37   86.82
  -3 -21  -7  460.64   68.73
   3 -21   7  117.50   48.51
  -3 -21  -8  200.94   36.47
   3 -21   8  284.41   63.85
   3  21   9  204.86   65.19
  -3 -21  -9  232.99   96.80
   3 -21   9  261.15  130.16
   3 -23  -9   53.77   57.97
   3 -23  -8 2261.66  368.40
   3 -23  -7  751.29  100.90
   3 -23  -6 1466.47  160.22
   3 -23  -5 4186.72  290.92
  -3  23   4  310.74   51.05
   3  23  -4  617.52  117.22
   3 -23  -4  609.41  133.44
  -3  23   3   62.49   22.42
  -3  23   3  108.37   26.83
   3  23  -3  300.43   74.95
  -3 -23   3  164.69   50.16
  -3 -23   3  189.93   40.90
   3 -23  -3  213.16   57.92
  -3  23   2 5913.92  332.49
   3  23  -2 6326.58  363.17
  -3  23   2 5893.35  335.45
  -3 -23   2 6442.26  363.22
   3 -23  -2 6189.39  356.34
  -3  23   1  534.53   90.99
   3  23  -1  652.26   71.61
   3  23  -1  433.04  102.72
  -3  23   1  606.01   76.80
  -3 -23   1  576.54   61.97
   3 -23  -1  711.92   86.17
   3  23   0 7805.28  443.72
   3  23   0 7670.33  436.28
   3 -23   0 7831.83  445.74
   3 -23   0 6913.86  410.85
  -3 -23   0 8583.74  485.96
  -3  23  -110747.02  612.75
   3  23   110407.73  587.27
   3 -23   110630.45  599.66
   3 -23   111906.05 2416.82
  -3 -23  -111317.74 2293.83
   3  23   2 2864.39  210.76
  -3 -23  -2 2714.49  204.98
   3 -23   2 2630.22  249.19
   3 -23   2 2137.20  167.59
  -3  23  -3  537.23  173.38
   3  23   3  707.90  149.45
  -3 -23  -3  910.03  191.47
   3 -23   3  775.50  166.42
   3 -23   3  524.74  115.75
   3  23   4 3519.39  243.79
  -3 -23  -4 4110.08  285.21
   3 -23   4 4509.47  468.67
  -3  23  -5  132.06   53.25
   3  23   5  128.93   53.58
  -3 -23  -5  219.29   67.25
   3 -23   5  147.96   50.65
  -3  23  -6 4342.22  312.13
   3  23   6 4885.12  330.45
  -3 -23  -6 5239.05  320.98
   3 -23   6 5087.10  559.44
   3  23   7 2308.31  292.80
  -3 -23  -7 2529.75  242.34
   3 -23   7 3071.69  351.73
   3  23   8 2149.96  162.93
  -3 -23  -8 2458.68  182.68
   3 -23   8 2048.09  393.03
  -3 -23  -9   19.50   38.58
   3 -23   9  109.31   69.15
   3 -25  -9  195.07  100.99
   3 -25  -8  373.86   91.37
   3 -25  -7   82.15   41.77
   3 -25  -6  171.79   55.19
   3 -25  -5  947.82   92.69
   3  25  -4  609.76  130.93
   3 -25  -4  752.43  109.03
  -3  25   3   67.44   20.33
  -3  25   3   33.38   10.45
   3  25  -3  129.60   46.77
  -3 -25   3   69.87   26.75
  -3 -25   3  114.72   31.57
   3 -25  -3  122.15   50.50
  -3  25   2 1162.21  169.89
  -3  25   2 1365.24  110.19
   3  25  -2 1542.00  183.51
  -3 -25   2  959.12  199.10
  -3 -25   2 1511.52  122.27
   3 -25  -2 1404.12  125.86
  -3  25   1   92.02   37.75
   3  25  -1  133.67   39.47
   3  25  -1  108.74   28.27
  -3  25   1  174.76   53.42
  -3 -25   1  267.51   53.46
   3 -25  -1  220.99   55.01
  -3  25   0   -4.39   13.56
   3  25   0    0.51   18.25
   3  25   0   38.40   19.55
   3 -25   0   58.84   22.82
  -3 -25   0   48.71   15.95
   3  25   1  -11.13   16.94
  -3 -25  -1   33.49   23.08
   3 -25   1   50.92   17.02
   3  25   2    4.35   16.79
  -3 -25  -2   35.12   19.61
   3 -25   2   15.02   18.48
   3  25   3   78.64   26.11
   3 -25   3  126.78   33.56
   3 -25   3  195.86   60.10
  -3 -25  -3  126.05   40.26
   3  25   4 1978.05  184.03
   3 -25   4 2325.80  196.00
   3 -25   4 2360.75  359.29
  -3 -25  -4 2951.09  238.16
   3  25   5  355.09   52.92
   3 -25   5  298.05   54.23
   3 -25   5  242.55   90.69
  -3 -25  -5  388.76   85.47
   3  25   6   21.46   25.96
   3 -25   6   26.09   25.70
   3  25   7   28.82   26.40
  -3 -25  -7   54.50   34.04
   3 -25   7  180.38   73.79
   3  25   8   42.84   32.71
  -3 -25  -8  105.95   54.16
   3 -25   8  239.02   66.54
   3 -27  -8  240.69   60.98
   3 -27  -7  172.57   59.42
   3 -27  -6  154.77   46.40
   3  27  -5   35.28   28.25
   3 -27  -5   55.81   19.01
  -3  27   4   46.02   14.43
   3  27  -4  205.71   63.86
   3 -27  -4  243.22   52.31
   3  27  -3  271.97   54.13
  -3  27   3  113.91   28.45
   3 -27  -3  249.54   54.95
  -3 -27   3  119.12   35.71
  -3  27   2  238.50   51.49
   3  27  -2  423.85   90.82
  -3  27   2  179.58   47.95
  -3 -27   2  191.58   45.25
   3 -27  -2  451.99   71.95
  -3  27   1  286.14   57.16
   3  27  -1  350.74   81.60
  -3  27   1   90.42   35.48
  -3 -27   1  214.21   46.21
   3 -27  -1  313.96   59.42
   3  27   0    1.40   10.68
  -3  27   0   40.20   25.00
  -3  27   0    2.29   19.02
  -3 -27   0    5.68   16.73
   3 -27   0   58.21   27.21
   3  27   1   71.29   30.01
  -3 -27  -1   65.06   29.91
   3 -27   1  151.54   46.36
   3  27   2  672.78  145.12
  -3 -27  -2  756.03  138.96
   3 -27   2  712.32  113.04
   3 -27   2  190.39   69.24
   3  27   3   25.18   17.15
  -3 -27  -3   35.15   34.09
   3 -27   3   16.86   19.54
   3  27   4   35.07   12.69
   3 -27   4   88.08   12.57
   3 -27   4  101.83   24.75
  -3 -27  -4  200.42   42.32
   3  27   5  683.59   82.29
  -3 -27  -5  614.28  139.95
   3 -27   5  466.32  106.95
   3  27   6   85.12   27.76
  -3 -27  -6  173.97   64.84
   3 -27   6   90.75   44.42
  -3 -27  -7  240.83   63.62
   3 -27   7  177.40   57.76
  -3 -27  -8  227.89   70.74
   3 -27   8  322.51  103.39
   3 -29  -8  173.88   97.16
   3 -29  -7  183.53   78.45
   3  29  -6 1387.09  128.22
   3 -29  -6 1389.43  113.26
   3  29  -5   64.31   30.51
   3 -29  -5   32.30   43.34
   3  29  -4 2754.05  174.15
   3  29  -3 1996.37  128.70
  -3  29   3 1654.03  109.91
   3 -29  -3 2029.43  136.47
  -3 -29   3 1958.32  116.50
   3  29  -2  716.79  161.80
  -3  29   2  454.34   56.96
   3 -29  -2  645.76  113.35
  -3  29   1 1191.50   98.57
   3  29  -1 1091.88  178.07
   3 -29  -1 1295.86  112.80
  -3 -29   1 1241.70  103.95
  -3  29   0 1438.80  135.27
   3  29   0 1504.39  152.02
   3 -29   0 1477.08  165.40
  -3 -29   0 1501.67  143.11
   3  29   1  971.42  128.17
   3 -29   1 1176.94  104.60
   3  29   2 2300.17  223.03
  -3 -29  -2 2413.90  231.95
   3 -29   2 2392.98  222.21
   3  29   3 1841.60  166.19
  -3 -29  -3 1738.89  117.84
   3 -29   3 1494.49  119.79
   3  29   4 1593.32  196.77
  -3 -29  -4 2156.14  227.56
   3  29   5 3058.75  285.63
  -3 -29  -5 3422.61  343.45
   3 -29   5 2393.52  363.76
  -3 -29  -6 2554.58  226.97
   3 -29   6 1725.85  236.86
  -3 -29  -7   77.48   36.24
   3 -29   7  105.58   35.73
   3  31  -7  219.92   55.01
   3 -31  -7   98.94   65.17
   3  31  -6  351.73  106.79
   3 -31  -6  583.00  128.50
   3  31  -5 2145.72  174.71
   3 -31  -5 2608.59  188.25
   3  31  -4 1019.56  186.55
   3 -31  -4  868.31  260.48
   3  31  -3   79.78   31.61
   3 -31  -3   63.36   33.49
   3  31  -2  667.01   53.65
  -3  31   2  565.57   64.88
   3 -31  -2  931.07   66.78
  -3 -31   2  658.96   73.10
   3  31  -1   52.59   18.82
  -3 -31   1   46.68   19.89
   3 -31  -1   74.04   39.20
  -3  31   0   69.75   16.58
   3  31   0   57.01   23.91
   3 -31   0   74.47   21.60
  -3 -31   0  107.94   32.39
   3  31   1  759.37  128.22
  -3  31  -1  934.69  109.84
   3 -31   1 1394.74   97.63
   3  31   2 2188.31  226.06
  -3 -31  -2 1864.08  228.29
   3  31   3  379.72   95.81
  -3 -31  -3  647.28   83.10
   3 -31   3  495.07   56.78
   3  31   4   31.15   18.33
  -3 -31  -4  157.33   57.68
  -3 -31  -5   29.61   37.26
   3  31   6  229.02   69.62
  -3 -31  -7  251.42   81.02
   3 -31   7   72.12   39.20
   3  33  -6  251.98  146.11
   3 -33  -6  627.89  119.28
   3  33  -5  204.62   82.01
   3 -33  -5  429.63  103.04
   3  33  -4  893.33  220.09
   3 -33  -4 1070.83   72.80
   3  33  -3   44.48   24.08
   3  33  -2  465.07   89.41
   3 -33  -2  333.96  119.48
   3  33  -1  230.99   66.34
   3 -33  -1  229.44   55.63
   3  33   0   21.87   14.89
  -3  33   0   29.58   16.86
   3 -33   0   34.74   28.23
   3  33   1 1361.95  185.19
  -3  33  -1 1836.40  171.41
   3 -33   1 1828.30  174.41
   3  33   2  777.06  221.17
  -3 -33  -2 1239.61  121.73
   3  33   3   29.47   17.19
  -3 -33  -3  142.73   48.85
   3  33   4 2431.81  279.08
  -3 -33  -4 3510.60  297.89
   3  33   5   53.48   33.07
  -3 -33  -6   40.02   36.83
   3  35  -5  165.91   71.66
   3  35  -4   69.63   27.37
   3 -35  -4   41.77   29.64
   3  35  -3   94.88   23.62
   3 -35  -3  156.70   45.95
   3  35  -2  773.84  135.73
   3 -35  -2  600.67  157.96
   3 -35  -1 2238.72  183.18
   3  35   0   22.38   20.09
   3 -35   0   30.56   21.26
  -3 -35  -1  300.48   73.39
   3  35   2  416.08  133.06
  -3  35  -2  437.02  129.59
  -3 -35  -2  783.41   83.54
  -3 -35  -3   48.24   27.42
  -3 -35  -4  588.44  203.20
  -3 -35  -5   89.58   39.57
   3  37  -4  332.49   95.74
   3 -37  -4  229.64   98.17
   3  37  -3  209.99   89.32
   3 -37  -3  474.14  120.47
   3  37  -2  220.19   46.06
   3 -37  -2  542.26  115.27
   3  37  -1  270.57  104.51
   3 -37  -1  556.10  109.07
   3  37   0   45.31   32.95
  -3 -37   0   20.68   19.40
  -3  37  -1   61.83   25.40
   3  37   1   57.72   23.87
   3 -37   1  128.03   44.54
  -3 -37  -1   98.52   57.07
   3  37   2   30.41   15.73
  -3  37  -2    9.58   10.78
  -3 -37  -2    1.13   23.85
  -3  37  -3 1264.35  214.15
  -3 -37  -3 1826.91  308.26
   3 -39   0 1160.31  198.42
  -4   0  12  315.50  115.19
  -4   0  11    7.99   36.19
  -4   0  10  201.75   63.67
   4   0  -9   41.26   16.89
  -4   0   9    6.41   22.98
   4   0  -8 2302.27  187.07
  -4   0   8 1873.53  215.75
   4   0  -7   34.02   27.13
   4   0  -7   -3.13   19.98
  -4   0   7   28.88   20.44
   4   0  -6  207.49   51.34
   4   0  -6  418.05   34.38
  -4   0   6  403.88   57.75
   4   0  -6  414.95   36.53
   4   0  -5   47.07   39.12
   4   0  -5   -4.05   15.44
   4   0  -5   10.09   15.42
  -4   0   419001.36  569.97
   4   0  -423817.96  693.69
   4   0  -422897.73  658.08
  -4   0   3  -36.16   42.70
   4   0  -3   45.83   43.77
   4   0  -3   29.98   14.09
   4   0  -3   18.81    8.05
  -4   0   220466.61  448.95
   4   0  -217484.58  369.61
   4   0  -220810.25  427.08
   4   0  -1    9.12   24.55
  -4   0   1   12.13   19.26
   4   0  -1   15.22   16.86
  -4   0   1   14.86    8.44
  -4   0   0  522.04   47.29
   4   0   0  469.10   38.02
   4   0   0  464.70   37.02
  -4   0   0  508.87   34.96
   4   0   1   43.61   15.44
  -4   0  -1   53.63   13.33
   4   0   1   48.63   25.60
  -4   0  -1    7.81   17.03
  -4   0  -2  813.31   66.53
   4   0   2  793.05   80.84
   4   0   2 1033.42  155.80
  -4   0  -2  978.01   71.94
  -4   0  -3   19.16   17.06
   4   0   3   26.67   13.28
   4   0   3   92.36   56.69
  -4   0  -3   -1.43   26.07
  -4   0  -4  831.41   80.46
   4   0   4  768.65   55.12
   4   0   4  710.78  128.04
  -4   0  -4  793.24   61.59
  -4   0  -5   37.97   12.18
   4   0   5   26.77   13.00
   4   0   5   40.04   28.93
  -4   0  -6  343.21   64.47
   4   0   6  311.35   51.08
   4   0   6  268.48   56.81
  -4   0  -7   42.36   13.23
   4   0   7   32.73   41.18
  -4   0  -8  424.60  135.04
   4   0   8  560.44  102.61
  -4   0  -9   10.20   13.29
   4   0   9  -16.91   48.71
  -4   0 -10  789.07  192.32
   4   0  10 1155.57  126.04
  -4   0 -11   27.57   21.55
   4   0  11  -41.87   48.74
  -4   2  11  751.14  252.32
  -4  -2  11  750.62  180.86
   4   2 -10  255.16   44.77
   4  -2 -10  188.44   33.99
  -4  -2  10  161.66   49.27
   4   2  -9 4413.46  338.91
  -4   2   9 4059.62  415.09
   4  -2  -9 4669.72  366.19
  -4  -2   9 4734.50  374.58
   4   2  -8  424.77   99.27
   4   2  -8  810.53  134.50
  -4   2   8  822.90  151.52
   4  -2  -8  660.69  161.07
  -4  -2   8  864.25  156.05
   4   2  -7  284.49   56.94
   4   2  -7  178.54   50.51
  -4   2   7  347.54   64.14
   4  -2  -7  279.45   57.79
   4  -2  -7  147.11   51.54
  -4  -2   7  281.20   79.98
   4  -2  -7  330.69   44.49
   4   2  -6   41.81   28.27
  -4   2   6   49.27   12.15
   4   2  -6    6.09   11.61
   4   2  -6   21.79   17.98
   4  -2  -6   44.54   12.05
  -4  -2   6    8.49   12.28
   4  -2  -6   40.38   30.64
   4  -2  -6   31.30   19.45
   4   2  -511089.19  366.45
   4   2  -511199.82  365.23
   4   2  -510718.55  340.47
   4  -2  -511119.04  355.81
   4  -2  -5 9410.02  318.74
   4  -2  -510840.44  349.21
  -4   2   4 1878.40  291.45
   4   2  -4 1954.87   75.34
   4   2  -4 2041.99   84.25
   4  -2  -4 1832.90   87.29
  -4  -2   4 1849.17  127.52
   4  -2  -4 1805.32   65.31
  -4   2   327368.76  532.77
   4   2  -328441.87  519.44
   4   2  -329476.06  525.94
   4  -2  -329970.88  538.69
   4  -2  -329920.08  572.38
  -4  -2   327107.79  506.99
   4  -2  -330134.67  531.73
   4   2  -2 4055.42  116.56
  -4   2   2 3608.14  114.67
  -4   2   2 3609.75   80.62
   4   2  -2 3855.47   88.84
   4  -2  -2 4809.98  203.23
   4  -2  -2 3863.44   85.41
  -4  -2   2 4360.34  128.62
  -4   2   1  233.35   44.67
   4   2  -1  185.80   40.17
   4   2  -1  183.08   34.18
  -4   2   1  169.47   32.60
   4  -2  -1  177.38   35.52
  -4  -2   1  189.30   43.19
  -4  -2   1  154.97   17.38
   4  -2  -1  214.59   41.20
   4   2   0  387.35   61.62
  -4   2   0  330.39   55.10
  -4   2   0  388.75   37.92
   4   2   0  511.04   84.08
   4  -2   0  399.94   36.64
  -4  -2   0  430.91   67.77
   4  -2   0  614.96   97.59
  -4  -2   0  356.86   27.49
  -4   2  -128055.38  581.08
  -4  -2  -126765.09  551.83
   4  -2   126432.31  545.60
   4  -2   126691.00  556.96
  -4  -2  -127523.66  568.09
   4   2   2  363.11   54.87
  -4   2  -2  430.76   62.22
  -4   2  -2  416.91   47.08
   4   2   2  548.12   91.99
   4  -2   2  411.10   79.46
  -4  -2  -2  352.20   32.37
   4  -2   2  477.00   69.35
  -4  -2  -2  285.70   32.84
  -4   2  -3 2165.93  184.19
   4   2   3 2099.13  139.68
  -4   2  -3 2303.79   74.11
   4   2   3 2053.85  148.15
   4  -2   3 2012.05  133.62
  -4  -2  -3 2453.97   75.07
  -4  -2  -3 2162.39  144.62
   4  -2   3 2357.92   80.15
  -4   2  -4 3019.74  111.54
   4   2   4 3101.59  124.08
   4   2   4 2871.69  103.87
  -4   2  -4 3196.03  125.99
  -4  -2  -4 2809.21  103.63
   4  -2   4 2879.71  116.78
  -4  -2  -4 3024.57  115.12
   4  -2   4 2688.50  108.01
  -4   2  -5 1728.58   70.78
   4   2   5 1966.46   98.97
   4   2   5 1651.17   68.05
   4  -2   5 1704.13   68.20
  -4  -2  -5 1767.83   99.63
   4  -2   5 1649.01   85.72
  -4  -2  -5 1767.79   80.93
  -4   2  -6   50.46   26.41
   4   2   6  -29.57   32.16
   4  -2   6   -5.22   15.71
   4  -2   6  121.32   54.88
  -4  -2  -6   -0.51   14.46
  -4   2  -7 5980.74  424.43
   4   2   7 5757.67  434.56
  -4  -2  -7 5527.41  397.97
   4  -2   7 5809.80  428.17
  -4   2  -8  212.33   68.72
   4   2   8  158.71   50.78
  -4  -2  -8  163.51   60.21
   4  -2   8  359.63   99.95
  -4   2  -9  774.84   92.09
   4   2   9  902.65  209.63
  -4  -2  -9  857.48  138.55
   4  -2   9  937.73  205.73
  -4   2 -10  204.24   35.48
   4   2  10  180.16   75.65
  -4  -2 -10  132.95   45.54
   4  -2  10  153.69   83.90
  -4   2 -11   30.47   19.28
  -4  -2 -11   64.83   28.90
   4  -2  11   27.43   52.82
   4  -4 -12  163.65   52.36
  -4  -4  11  935.00  229.89
  -4   4  10   68.91   38.71
  -4  -4  10  124.66   38.78
   4   4  -9   20.52   14.26
   4  -4  -9   68.22   35.11
  -4  -4   9  -21.67   36.61
   4   4  -8   -7.97   21.24
   4   4  -8   54.92   22.54
  -4   4   8   54.55   31.59
   4  -4  -8   43.88   26.21
  -4  -4   8   66.04   26.81
   4  -4  -8   31.42   14.02
   4   4  -7 2190.44  142.84
   4   4  -7 2377.47  141.33
  -4   4   7 2298.36  164.19
   4  -4  -7 2509.53  190.97
  -4  -4   7 2230.79  265.87
   4  -4  -7 2102.47  196.40
   4   4  -6   39.38   13.13
   4   4  -6   16.01   14.56
   4   4  -6   12.99   24.29
  -4   4   6   32.90   23.86
   4  -4  -6   67.31   36.82
   4  -4  -6   34.35   24.36
   4   4  -5 2972.67  116.49
   4   4  -5 2371.44   90.98
   4   4  -5 2480.07  100.11
   4  -4  -5 2304.02  113.34
   4  -4  -5 2654.60  104.86
   4  -4  -5 2700.74  105.64
  -4   4   4 1240.59  180.20
   4   4  -4 1185.54   85.08
   4   4  -4  937.45  101.98
   4  -4  -4  931.07   99.31
  -4  -4   4 1426.17  246.21
   4  -4  -4 1132.83  100.41
  -4   4   3 6139.98  343.85
   4   4  -3 5102.96  105.01
   4   4  -3 5253.63  130.89
   4   4  -3 5515.19  113.36
   4  -4  -3 5065.01  141.79
  -4  -4   3 5304.90  126.98
   4  -4  -3 5759.53  108.04
   4  -4  -3 5299.42  113.74
   4   4  -2   98.85   17.99
  -4   4   2  143.90   44.69
   4   4  -2  126.04   27.79
  -4   4   2  122.08   27.47
   4  -4  -2  151.16   44.51
   4  -4  -2   85.29   16.19
  -4  -4   2   97.52   26.14
  -4   4   112097.96  311.08
   4   4  -111827.32  248.76
  -4   4   110999.48  227.38
   4   4  -111829.42  249.46
  -4  -4   111407.25  240.94
   4   4   0  700.03   87.89
  -4   4   0  342.44   35.32
   4   4   0  505.25   39.21
  -4   4   0  411.50   32.23
   4  -4   0  526.03   57.11
  -4  -4   0  529.82   42.59
   4  -4   0  510.05   41.47
  -4  -4   0  479.94   33.84
  -4   4  -1  571.68   98.03
   4   4   1  391.97   36.62
  -4   4  -1  348.88   30.71
   4   4   1  417.50   32.61
   4  -4   1  410.06   65.15
  -4  -4  -1  344.78   31.10
  -4  -4  -1  386.37   31.30
   4  -4   1  489.97   79.33
  -4   4  -2  279.86   37.55
   4   4   2  165.08   25.36
   4   4   2  152.44   44.62
  -4   4  -2  145.55   24.43
   4  -4   2  138.01   19.65
   4  -4   2  117.91   32.26
  -4  -4  -2  122.23   18.10
  -4  -4  -2  135.85   28.46
  -4   4  -3 2523.68   99.17
  -4   4  -3 2259.05   99.96
   4   4   3 2278.51   97.08
   4   4   3 2307.50   92.75
   4  -4   3 2423.84   80.43
   4  -4   3 2515.08   98.93
  -4  -4  -3 2508.77   87.10
  -4  -4  -3 2121.85   77.80
  -4   4  -4 1505.37   81.57
  -4   4  -4 1587.45   78.26
   4   4   4 1325.18   73.28
   4  -4   4 1802.31   86.59
  -4  -4  -4 1728.98   86.07
   4  -4   4 1553.53   60.84
  -4  -4  -4 1346.13   61.42
  -4   4  -5 5619.41  290.95
   4   4   5 4727.88  258.06
   4   4   5 4958.94  270.61
   4  -4   5 4863.54  252.20
   4  -4   5 5011.60  274.60
  -4  -4  -5 5329.49  278.94
  -4  -4  -5 5423.68  286.79
  -4   4  -6 1351.51   77.10
   4   4   6 1395.98  200.23
   4  -4   6 1335.54   73.06
   4  -4   6 1320.10   91.83
  -4  -4  -6 1520.25   87.47
  -4   4  -7 3576.00  257.63
   4   4   7 3468.86  292.92
  -4  -4  -7 3456.93  251.78
   4  -4   7 3714.72  311.52
  -4   4  -8  294.84   56.32
   4   4   8  225.82   45.17
  -4  -4  -8  380.37   63.78
   4  -4   8  290.15   65.32
  -4   4  -9  608.25  102.83
   4   4   9  525.28   73.00
  -4  -4  -9  497.59  136.79
   4  -4   9  646.65  117.40
   4   4  10   98.90   58.35
  -4  -4 -10    4.29   21.05
   4  -4  10   41.89   50.29
  -4   4 -11   57.16   35.38
   4   4  11  127.63   64.07
  -4  -4 -11   53.75   33.35
   4  -4  11  159.49   88.71
   4  -6 -11   72.53   31.94
  -4   6  10   40.06   20.66
   4  -6 -10  128.55   32.64
  -4  -6  10  308.07  145.92
   4   6  -9  233.19   67.73
  -4   6   9  402.88   65.83
   4  -6  -9  275.44   53.39
  -4  -6   9  362.14   64.38
   4   6  -8   30.76   25.91
  -4   6   8   65.92   29.66
   4  -6  -8   68.78   34.06
  -4  -6   8   53.93   23.93
   4  -6  -8   28.43   15.36
   4   6  -7    8.58   21.47
  -4   6   7   54.60   30.79
   4  -6  -7   44.81   51.77
  -4  -6   7   71.88   34.73
   4  -6  -7    6.54   11.07
   4   6  -6  857.99   92.54
   4   6  -6  808.98  140.70
   4   6  -6  859.98   77.34
  -4   6   6  872.23   75.50
   4  -6  -6  739.40   87.68
   4  -6  -6  969.66   99.25
   4  -6  -6  754.14   71.37
   4   6  -5 3035.13  108.80
   4   6  -5 3585.09  118.68
   4   6  -5 3700.43  169.79
   4  -6  -5 3650.44  275.00
   4  -6  -5 3717.36  133.27
   4  -6  -5 3581.58  122.41
  -4   6   4   96.84   24.49
   4   6  -4   52.17   21.02
   4   6  -4   69.59   23.42
   4  -6  -4   42.92   30.99
  -4  -6   4   95.61   36.10
   4  -6  -4   54.78   19.22
  -4   6   3  108.03   28.92
   4   6  -3   78.50   16.38
   4   6  -3   98.32   27.34
   4   6  -3  124.99   17.56
   4  -6  -3   26.09   24.83
  -4  -6   3   80.89   35.56
   4  -6  -3  117.60   19.27
   4  -6  -3  143.79   20.71
  -4   6   2  239.13   57.67
   4   6  -2  277.53   50.05
   4   6  -2  273.80   39.52
  -4   6   2  225.86   16.79
   4  -6  -2  360.82   49.26
   4  -6  -2  210.29   27.28
  -4  -6   2  219.04   35.15
  -4   6   1  779.10   88.70
   4   6  -1  831.53   54.08
   4   6  -1  680.20   46.92
  -4   6   1  785.41   49.12
   4  -6  -1 1066.67   96.98
   4  -6  -1  714.04   49.76
  -4  -6   1  749.57   49.00
  -4  -6   1  774.85   49.92
  -4   6   0 2627.78  115.56
  -4   6   0 2475.81   65.79
   4   6   0 2251.44  132.87
   4   6   0 2138.89  128.04
   4  -6   0 2424.32  172.69
  -4  -6   0 2398.91  156.59
   4  -6   0 2461.06   90.80
  -4   6  -1 1832.78  142.99
   4   6   1 2163.29  129.06
   4   6   1 2033.65  125.07
  -4   6  -1 1952.26  120.47
   4  -6   1 2141.78  132.02
  -4  -6  -1 2067.21  124.47
  -4  -6  -1 2073.72  124.40
  -4   6  -2  814.38  117.85
   4   6   2  763.79   95.92
  -4   6  -2  562.09   49.26
   4   6   2  774.40   66.08
   4  -6   2  767.34   95.90
   4  -6   2  784.22  114.93
  -4  -6  -2  715.72   58.38
  -4  -6  -2  640.53   49.38
   4   6   3 6094.41  199.68
   4   6   3 5663.00  174.55
  -4   6  -3 5116.57  163.81
  -4  -6  -3 5835.66  179.00
   4  -6   3 5631.39  184.75
   4  -6   3 5909.44  177.46
  -4  -6  -3 5799.59  178.40
  -4   6  -4  441.16   64.97
   4   6   4  484.09   81.64
   4   6   4  425.93   52.45
  -4   6  -4  316.02   44.35
   4  -6   4  426.26   35.55
   4  -6   4  378.73   47.96
  -4  -6  -4  528.31  108.09
  -4  -6  -4  438.92   41.95
  -4   6  -5   29.51   20.38
   4   6   5    1.42   32.98
  -4  -6  -5   38.51   24.82
   4  -6   5    9.43   39.32
   4  -6   5   26.75   13.17
  -4  -6  -5   71.88   29.35
  -4   6  -6 2281.96  138.58
   4   6   6 2090.96  143.43
   4  -6   6 2156.34  185.73
   4  -6   6 2351.14  161.25
  -4  -6  -6 2112.79  131.04
  -4   6  -7  799.50  164.07
   4   6   7  805.61  185.11
  -4  -6  -7  845.31  153.34
   4  -6   7  845.55  141.59
  -4   6  -8   41.42   17.73
   4   6   8   64.17   49.62
  -4  -6  -8   44.25   29.79
   4  -6   8    9.46   45.15
   4   6   9   29.50   36.26
  -4  -6  -9   39.67   20.28
   4  -6   9   -2.77   50.36
  -4   6 -10  231.34   89.17
   4   6  10  783.50  131.53
  -4  -6 -10  460.48   48.09
   4  -6  10  388.48   74.92
   4   6  11   66.41   36.15
   4  -6  11  150.67   97.38
   4  -8 -11   68.29   32.21
  -4  -8  10   46.08   21.20
   4   8  -9   32.96   13.82
  -4   8   9   56.88   22.32
   4  -8  -9   68.43   39.77
  -4  -8   9   51.60   26.67
   4   8  -8  784.96  153.38
   4   8  -8 1264.29   89.35
  -4   8   8  560.95  143.37
   4  -8  -8 1322.09  201.72
  -4  -8   8 1157.93  202.79
   4  -8  -8 1101.54   83.75
   4   8  -7 4109.24  291.92
   4   8  -7 5919.74  415.72
  -4   8   7 5501.20  401.56
   4  -8  -7 5543.36  409.90
   4   8  -6   50.02   17.97
   4   8  -6  159.10   42.68
  -4   8   6  108.58   26.14
   4  -8  -6  159.52   34.76
   4  -8  -6  169.61   43.08
   4   8  -5 1980.08   68.41
   4   8  -5 2252.94   84.10
   4   8  -5 2284.36   98.85
   4  -8  -5 2044.90   85.27
   4  -8  -5 2671.10  134.91
   4  -8  -5 2112.29   75.39
   4   8  -4  765.12   60.52
  -4   8   4  719.84   94.85
   4   8  -4  769.98  112.28
   4  -8  -4  773.68  175.48
  -4  -8   4 1026.20  132.17
   4  -8  -4  981.06   68.42
   4  -8  -4  845.03   51.96
  -4   8   3 1619.26  245.76
   4   8  -3 1365.19  107.36
   4   8  -3 1404.92   93.33
   4   8  -3 1491.16   50.18
  -4  -8   3 1789.70  119.76
   4  -8  -3 1125.23  118.75
  -4   8   2  155.46   52.99
   4   8  -2   63.01   16.20
   4   8  -2   34.89   11.35
  -4   8   2   30.12    3.89
   4  -8  -2   21.47   35.13
   4  -8  -2   -1.35    3.30
  -4  -8   2   -8.90   13.50
  -4   8   113554.57  243.03
   4   8  -114765.95  268.71
   4   8  -115055.80  277.85
   4  -8  -114840.81  270.51
  -4  -8   115398.29  281.15
  -4  -8   114786.69  272.27
  -4   8   0  267.99   58.98
  -4   8   0  219.24   40.62
   4   8   0  202.02   38.63
   4   8   0  135.03   23.59
   4  -8   0  177.83   43.36
   4  -8   0  247.77   47.18
  -4  -8   0  265.96   44.38
  -4  -8   0  273.08   46.72
  -4   8  -1   90.85   35.92
  -4   8  -1   17.65   21.06
   4   8   1   48.76   16.01
   4   8   1   52.39   29.12
   4  -8   1   51.99   16.82
   4  -8   1   33.34   20.20
  -4  -8  -1   62.05   16.44
  -4  -8  -1   -0.15   12.14
  -4   8  -2 2053.69  139.60
  -4   8  -2 2537.04  109.49
   4   8   2 2364.72   69.13
   4   8   2 2035.69  139.16
  -4  -8  -2 2341.03   69.69
   4  -8   2 2045.90  134.74
   4  -8   2 1965.63  135.35
  -4  -8  -2 2350.28   64.49
  -4   8  -3 7849.38  240.31
  -4   8  -3 7363.63  232.97
   4   8   3 7237.48  220.40
   4   8   3 7881.42  247.43
   4  -8   3 7112.22  228.91
   4  -8   3 7430.43  219.89
  -4  -8  -3 7683.75  232.57
  -4   8  -4 2581.65  100.43
  -4   8  -4 2057.83  178.97
   4   8   4 2195.85   87.80
   4   8   4 2139.89  119.47
  -4  -8  -4 2246.91   89.99
   4  -8   4 1989.33   98.02
   4  -8   4 2153.16   79.57
  -4  -8  -4 2254.13   87.56
  -4   8  -5 4395.62  229.24
   4   8   5 4678.56  255.26
  -4  -8  -5 4865.02  257.92
   4  -8   5 4947.17  312.03
   4  -8   5 4662.63  246.17
  -4  -8  -5 4112.31  217.55
  -4   8  -6   11.57   12.15
   4   8   6   61.68   36.12
  -4  -8  -6  131.75   35.30
   4  -8   6   99.74   31.36
  -4   8  -7  305.64   77.53
   4   8   7  278.81   81.82
   4  -8   7  205.66   47.98
   4  -8   7  301.49   64.50
  -4  -8  -7  328.35   62.94
  -4   8  -8   67.81   19.95
   4   8   8  120.51   49.63
  -4  -8  -8   90.35   36.93
   4  -8   8  134.84   51.26
  -4   8  -9 1552.31  161.15
   4   8   9 1623.51  183.87
  -4  -8  -9 1387.27  187.41
   4  -8   9 1497.62  297.01
  -4   8 -10   29.94   17.28
   4   8  10  129.81   57.89
  -4  -8 -10  133.45   56.48
   4  -8  10   88.66   43.89
   4   8  11  703.59  347.70
   4  -8  11 1093.99  213.70
   4 -10 -11  465.16  150.49
  -4  10  10  254.66   66.82
   4 -10 -10  364.96   89.83
   4  10  -9  883.32   42.78
   4 -10  -9 1124.03   72.11
   4  10  -8   51.99   17.69
   4  10  -8  135.15   43.62
   4 -10  -8  265.87   62.72
   4 -10  -8  133.47   38.88
   4  10  -7  269.81   50.81
  -4  10   7  285.00   63.76
   4 -10  -7  308.84   57.83
   4 -10  -7  151.48   40.52
   4  10  -6 2576.15  122.31
   4  10  -6 2123.62  100.29
   4 -10  -6 2500.61  222.72
   4 -10  -6 2196.95  106.84
   4  10  -5 5245.13  282.49
   4  10  -5 5145.02  260.75
   4 -10  -5 5644.08  296.53
   4 -10  -5 4939.64  301.58
   4 -10  -5 5380.78  273.07
   4  10  -4   73.76   31.84
   4 -10  -4  110.56   37.99
   4 -10  -4   49.83   18.27
  -4 -10   4  122.45   25.93
  -4  10   3 8290.02  289.35
   4  10  -3 8086.41  259.65
   4  10  -3 8461.42  251.26
   4  10  -3 8845.04  253.69
   4 -10  -3 6526.81  217.95
  -4 -10   3 6588.39  194.28
  -4  10   2  773.53  116.06
   4  10  -2  573.91   47.35
   4  10  -2  640.16   45.38
  -4 -10   2  631.57   61.24
   4 -10  -2  593.95   59.83
  -4  10   1  449.40   83.09
  -4  10   1  376.19   30.51
   4  10  -1  373.63   36.63
   4  10  -1  475.09   64.71
   4 -10  -1  454.80  122.94
   4 -10  -1  357.54   34.44
  -4 -10   1  465.04   47.63
  -4 -10   1  443.34   40.57
  -4  10   0  357.83   58.25
  -4  10   0  243.13   36.27
   4  10   0  338.89   40.00
   4  10   0  327.63   64.92
   4 -10   0  308.50   65.76
   4 -10   0  264.60   35.92
  -4 -10   0  251.21   28.20
  -4 -10   0  308.67   53.04
  -4  10  -119818.77  392.93
  -4  10  -119191.35  359.24
   4  10   119102.00  351.62
   4  10   120154.53  372.56
   4 -10   119018.22  355.03
   4 -10   119902.43  378.57
  -4 -10  -119606.19  361.37
  -4 -10  -119567.18  357.64
  -4  10  -2  448.65   85.32
  -4  10  -2  270.94   49.66
   4  10   2  363.52   48.12
   4  10   2  292.74   36.89
   4 -10   2  328.93   45.19
   4 -10   2  429.21   58.76
  -4 -10  -2  395.22   47.80
  -4 -10  -2  321.38   53.42
  -4  10  -3 3677.20  133.39
  -4  10  -3 4202.36  156.73
   4  10   3 4139.61  147.22
   4  10   3 4624.59  170.33
   4 -10   3 4079.82  140.86
   4 -10   3 4692.56  248.74
  -4 -10  -3 3864.91  150.25
  -4 -10  -3 4578.34  156.97
  -4  10  -4 9144.18  300.69
  -4  10  -4 8324.61  329.58
   4  10   4 9057.25  305.78
   4 -10   4 8919.39  308.02
  -4 -10  -4 8692.51  286.91
   4 -10   4 8411.26  280.84
  -4 -10  -4 9020.69  295.74
  -4  10  -5   91.02   24.68
   4  10   5  178.65   45.99
   4 -10   5   33.62   16.79
   4 -10   5   64.67   38.46
  -4 -10  -5   68.70   33.76
  -4  10  -6  260.11   71.37
   4  10   6  264.96   79.33
   4 -10   6  301.56   49.71
   4 -10   6  229.79   66.48
  -4 -10  -6  325.83   47.29
  -4  10  -7 2128.33  154.86
   4  10   7 1688.62  138.63
   4 -10   7 1530.28  109.17
   4 -10   7 1692.57  141.28
  -4 -10  -7 1893.14  139.29
  -4  10  -8    7.58   11.59
   4  10   8   18.76   36.17
  -4 -10  -8   -1.30   25.17
   4 -10   8   46.78   56.33
  -4  10  -9  932.20  102.90
   4  10   9 1201.11  144.34
  -4 -10  -9 1251.92  208.04
   4 -10   9  950.06  247.60
   4  10  10  716.09  237.95
  -4 -10 -10  788.48  148.65
   4 -10  10  786.69  126.70
   4  10  11  839.47  168.14
  -4 -10 -11  497.58  134.51
   4 -10  11  229.24  102.23
   4 -12 -11  112.86   40.20
   4 -12 -10  767.25  227.92
  -4  12   9   31.71   18.09
   4 -12  -9   50.80   31.51
  -4  12   8 1353.31  177.30
   4 -12  -8 1264.40  226.72
   4 -12  -8 1105.35  133.93
   4  12  -7 2196.74  170.27
   4 -12  -7 8435.54 1541.96
   4 -12  -7 8929.22 1628.71
   4  12  -6   22.17    5.81
   4 -12  -6  174.96   47.14
   4 -12  -6   61.80   14.45
   4  12  -5  192.16   19.78
   4  12  -5  214.82   25.52
   4 -12  -5  210.65   33.87
   4  12  -4  306.23   57.53
   4  12  -4  394.46   46.31
  -4 -12   4  471.02   57.36
   4 -12  -4  382.53   72.28
   4 -12  -4  321.30   60.98
  -4  12   3  -18.36   55.83
   4  12  -3   41.56   11.30
   4  12  -3   36.03   21.50
  -4 -12   3   16.91   10.41
  -4  12   2 4557.23  212.34
   4  12  -2 3699.15  117.92
   4  12  -2 4526.59  135.18
  -4 -12   2 4489.59  142.16
   4 -12  -2 4186.87  195.07
  -4  12   1  193.01   63.09
  -4  12   1  151.31   26.24
   4  12  -1  174.23   30.26
   4  12  -1  100.32   30.57
   4 -12  -1   50.92   34.61
   4 -12  -1  164.53   24.39
  -4 -12   1  172.21   28.80
  -4  12   0  529.83   91.56
  -4  12   0  758.41  102.89
   4  12   0  719.70  106.10
   4  12   0  619.24   61.57
   4 -12   0  794.84   91.48
   4 -12   0  716.94   67.91
  -4 -12   0  769.79   70.80
  -4 -12   0  666.62   63.77
  -4  12  -1  423.41   66.90
   4  12   1  586.66  115.80
   4  12   1  522.34   60.31
   4 -12   1  462.42   70.45
   4 -12   1  660.26  110.75
  -4 -12  -1  507.02   52.89
  -4 -12  -1  538.83   52.86
  -4  12  -2  100.54   40.47
  -4  12  -2   56.94   24.94
   4  12   2  105.18   33.32
   4  12   2   74.87   25.95
   4 -12   2  108.40   20.43
   4 -12   2   67.64   21.99
  -4 -12  -2    8.10   20.56
  -4 -12  -2   31.41   15.12
  -4  12  -3 2890.92  118.90
   4  12   3 2839.36  105.94
   4 -12   3 2911.31  118.87
   4 -12   3 2806.58  119.99
  -4 -12  -3 3240.70  119.55
  -4 -12  -3 2825.83  101.56
  -4  12  -4  618.83   79.57
   4  12   4  840.03  146.47
  -4 -12  -4  911.83  142.21
   4 -12   4  913.16  181.35
   4 -12   4  966.33   95.76
  -4 -12  -4  751.80   72.78
  -4  12  -5 3077.97  217.68
   4  12   5 2569.66  161.14
  -4 -12  -5 3030.55  191.77
   4 -12   5 2873.14  185.67
  -4  12  -6   27.15   23.27
   4  12   6   93.21   31.82
  -4 -12  -6   74.06   41.25
   4 -12   6   88.99   32.92
   4 -12   6   34.20   16.35
  -4  12  -7   72.29   34.21
   4  12   7   94.79   50.31
   4 -12   7   64.17   17.93
   4 -12   7  222.48   80.34
  -4 -12  -7   73.12   42.16
  -4  12  -8   11.44   20.50
   4  12   8   56.29   53.13
  -4 -12  -8   27.41   16.51
   4 -12   8  120.08   65.37
  -4  12  -9  589.54  165.08
   4  12   9 1029.63  170.10
  -4 -12  -9 1108.69  174.19
   4  12  10   46.27   55.79
  -4 -12 -10   85.63   39.81
   4 -12  10  -26.03   57.29
   4 -14 -11 1648.76  280.03
   4 -14 -10   25.32   26.72
   4 -14  -9  117.55   51.37
  -4  14   8 1612.78  152.33
   4 -14  -8 1607.71  213.23
   4 -14  -7 4600.88  317.70
   4 -14  -7 4385.86  289.88
   4 -14  -6 9648.51  683.34
   4 -14  -6 8248.35  574.37
   4 -14  -520788.47 3622.54
   4  14  -4   13.52    5.58
  -4 -14   4   34.79    7.23
   4 -14  -4   76.98   22.14
  -4  14   3 1245.53  155.02
   4  14  -3 1297.49  174.66
   4  14  -3 1117.15  109.30
   4  14  -3 1242.69  116.40
   4 -14  -3 1055.96  120.50
  -4 -14   3 1468.32   83.75
  -4  14   2 7662.30  337.12
   4  14  -2 7092.50  232.52
  -4 -14   2 7663.68  243.61
  -4  14   1  963.22  161.97
  -4  14   1  850.78   57.42
   4  14  -1  830.31   55.66
   4  14  -1  818.31   58.79
   4 -14  -1  705.21   64.26
   4 -14  -1  869.32   58.32
  -4 -14   1  908.61   60.85
  -4  14   0  486.97   80.37
  -4  14   0  365.65   66.83
   4  14   0  343.75   35.68
   4  14   0  394.73   66.88
   4 -14   0  729.69  104.43
   4 -14   0  614.64   82.94
  -4 -14   0  355.49   37.50
  -4 -14   0  433.43   51.82
  -4  14  -111876.96  398.75
  -4  14  -113230.92  424.74
   4  14   112864.53  409.28
   4  14   114502.01  462.44
   4 -14   111520.21  371.30
   4 -14   112673.63  410.27
  -4 -14  -113526.56  429.56
  -4 -14  -114122.20  450.65
  -4  14  -2  223.03   49.36
  -4  14  -2   66.40   28.46
   4  14   2   65.59   24.00
   4  14   2  113.87   29.89
   4 -14   2  101.47   18.99
   4 -14   2   84.87   25.67
  -4 -14  -2   93.93   19.01
  -4 -14  -2   67.37   21.68
  -4  14  -3 6024.11  220.03
  -4  14  -3 5543.17  202.01
   4  14   3 5301.60  183.66
   4 -14   3 5501.99  202.02
   4 -14   3 5431.81  179.50
  -4 -14  -3 5490.86  189.30
  -4 -14  -3 5732.63  190.84
  -4  14  -410204.99  487.13
   4  14   4 9104.99  432.94
  -4 -14  -4 8002.89  377.80
   4 -14   4 8360.78  405.17
  -4 -14  -4 7136.75  335.08
  -4  14  -5  243.34   55.44
   4  14   5  108.08   44.30
  -4 -14  -5  331.00   72.58
   4 -14   5  299.09   77.35
  -4  14  -6  610.15  115.01
   4  14   6  744.22  122.03
  -4 -14  -6  800.21  123.49
   4 -14   6  673.28  146.45
   4 -14   6  489.44   87.42
  -4  14  -7 2085.38  221.84
   4  14   7 2247.19  273.28
  -4 -14  -7 2411.89  198.00
   4 -14   7 2329.42  200.72
   4  14   8   42.49   30.41
  -4 -14  -8   45.78   28.30
   4 -14   8  -34.05   41.24
   4  14   9  420.81   66.96
  -4 -14  -9  215.33   86.65
   4 -14   9  196.57   60.38
   4  14  10  166.51   50.11
  -4 -14 -10  185.10   51.60
   4 -14  10  292.98   93.82
   4 -16 -11  122.33   46.45
   4 -16 -10  344.59  142.88
   4 -16  -9  386.50   85.40
   4 -16  -8  147.91   45.29
   4 -16  -7 1918.94  155.73
   4 -16  -6   50.13   45.81
   4 -16  -5  925.02  116.46
   4  16  -4 4175.76  191.04
   4  16  -4 4248.76  205.97
   4 -16  -4 4215.74  207.70
   4  16  -3  256.49   43.70
   4  16  -3  174.41   16.11
   4 -16  -3  213.75   34.49
  -4 -16   3  179.54   26.43
  -4  16   2 5861.57  571.67
  -4  16   2 5257.93  166.34
   4  16  -2 5604.47  190.17
   4  16  -2 5417.24  176.00
   4 -16  -2 5046.41  262.13
  -4 -16   2 5603.29  182.53
  -4  16   1 5082.13  294.29
  -4  16   1 4982.94  163.63
   4  16  -1 5217.23  175.42
   4  16  -1 4874.19  165.56
   4 -16  -1 4875.91  240.14
  -4 -16   1 5549.79  181.40
  -4  16   0  118.63   60.96
  -4  16   0   38.26   17.62
   4  16   0   12.84   12.99
   4  16   0   44.47   19.56
   4 -16   0  126.33   44.65
   4 -16   0   57.13   23.70
  -4 -16   0   38.87   10.37
  -4 -16   0   76.15   23.95
  -4  16  -1 1522.25  288.37
  -4  16  -1 1253.08  176.40
   4  16   1 1584.33   69.95
   4  16   1 1395.78   59.54
   4 -16   1 1231.76  139.92
   4 -16   1 1666.48   94.33
  -4 -16  -1 1419.24   62.28
  -4 -16  -1 1496.70   75.99
  -4  16  -2  985.79  149.92
  -4  16  -2  648.46  153.04
   4  16   2  922.29   92.50
   4  16   2 1166.24  115.55
   4 -16   2 1019.13  145.04
   4 -16   2 1216.73  205.32
  -4 -16  -2 1082.69  106.23
  -4 -16  -2 1124.63  110.77
  -4  16  -3  101.18   43.13
  -4  16  -3   86.38   37.86
   4  16   3   48.34   18.30
   4 -16   3  160.48   43.12
   4 -16   3   53.41   20.05
  -4 -16  -3    5.84   20.97
  -4 -16  -3    8.92    9.82
  -4  16  -4 1514.77  267.27
   4  16   4 1399.57  147.17
  -4 -16  -4 1420.35  152.71
   4 -16   4 1124.74  123.72
   4 -16   4 1471.80  176.47
  -4  16  -5 1054.39  127.51
   4  16   5  987.22  168.05
   4 -16   5  718.64   79.54
   4 -16   5  880.52  110.32
  -4 -16  -5  908.26  116.15
  -4  16  -6  881.49  179.72
   4  16   6  728.17  131.24
   4 -16   6  622.51   85.01
   4 -16   6  689.07  117.28
  -4 -16  -6  652.59  125.02
  -4  16  -7  282.36   70.93
   4  16   7  433.16   72.62
  -4 -16  -7  469.04   63.78
   4 -16   7  669.24  119.48
   4  16   8  192.46   53.37
  -4 -16  -8  201.18   45.41
   4 -16   8  316.08  107.01
   4  16   9   64.58   44.35
  -4 -16  -9  152.34   61.67
   4 -16   9  152.82   77.29
   4  16  10  299.94   96.19
  -4 -16 -10  326.02   89.89
   4 -16  10  184.09  108.26
   4 -18 -10   79.25   43.62
   4 -18  -9  928.10  155.17
   4 -18  -8  110.03   47.74
   4 -18  -7  228.34   44.46
   4 -18  -6  124.15   52.48
   4 -18  -5 2909.64  216.77
   4  18  -4  334.08   77.54
  -4 -18   4  212.84   50.44
   4 -18  -4  469.98   67.54
   4  18  -3 1297.91  230.37
   4  18  -3 1392.89   68.98
   4 -18  -3 1471.62  105.66
  -4 -18   3 1376.82   73.13
  -4  18   2  103.71   60.23
  -4  18   2    7.11    4.50
   4  18  -2   23.07    7.99
  -4  18   2    9.91    6.19
   4  18  -2   38.03   18.93
  -4 -18   2   44.25   13.73
  -4  18   1  435.13   89.17
  -4  18   1  275.78   56.66
   4  18  -1  424.49   42.01
   4  18  -1  354.60   69.80
   4 -18  -1  351.29   47.71
  -4 -18   1  468.58   57.47
  -4  18   0 1317.77  188.56
  -4  18   0 1250.70   74.39
   4  18   0 1300.36   79.34
   4  18   0 1126.29   85.94
   4 -18   0 1278.71  112.05
   4 -18   0 1516.12  104.74
  -4 -18   0 1319.38   75.90
  -4  18  -1 4782.74  389.97
  -4  18  -1 3830.82  205.17
   4  18   1 3981.81  210.46
   4  18   1 4019.87  218.66
   4 -18   1 3253.98  177.41
   4 -18   1 4306.80  241.01
  -4 -18  -1 4241.74  223.55
  -4 -18  -1 4353.04  227.54
  -4  18  -2 1087.92  244.36
  -4  18  -2  702.02   95.41
   4  18   2 1151.68   75.38
   4 -18   2 1164.63   85.82
   4 -18   2 1023.82  139.41
  -4 -18  -2 1267.85   79.15
  -4 -18  -2 1090.04   91.57
  -4  18  -3   96.43   45.87
   4  18   3   31.43   18.50
  -4 -18  -3   51.97   36.22
   4 -18   3   42.77   29.77
  -4 -18  -3   17.76   12.50
  -4  18  -4  147.84   54.24
   4  18   4  296.23   64.63
  -4 -18  -4  193.65   53.91
   4 -18   4  211.26   59.05
   4 -18   4  125.60   38.70
  -4  18  -5 6026.37  494.89
   4  18   5 6450.09  512.88
  -4 -18  -5 5920.81  470.76
   4 -18   5 5805.93  524.88
  -4  18  -6  742.55  141.58
   4  18   6  697.79  142.10
   4 -18   6  504.87   87.89
   4 -18   6  614.32  132.72
  -4 -18  -6  448.55  146.14
  -4 -18  -7 2299.40  151.02
   4 -18   7 1928.03  322.89
   4  18   8   18.12   26.82
  -4 -18  -8   60.77   30.50
   4 -18   8   73.70   50.46
   4  18   9   88.89   54.25
  -4 -18  -9    3.67   31.91
   4 -18   9  157.88   89.10
  -4 -18 -10   67.32   37.62
   4 -18  10  301.63  107.47
   4 -20 -10  720.60  296.90
   4 -20  -9  398.69   60.56
   4 -20  -8   83.80   44.82
   4 -20  -7 1690.66  167.94
   4 -20  -6  511.42   86.26
   4 -20  -5   -8.02   31.91
   4  20  -4 4157.05  300.62
  -4 -20   4 2524.68  177.54
   4 -20  -4 3790.45  277.14
   4  20  -3 3701.74  218.43
   4  20  -3 3459.55  197.16
   4 -20  -3 3587.53  214.59
  -4 -20   3 3338.40  189.42
  -4  20   2   69.73   18.47
   4  20  -2   82.45   21.05
   4  20  -2   55.91   17.22
  -4  20   2   48.34   12.22
  -4 -20   2   71.11   21.00
   4 -20  -2   63.34   24.37
  -4  20   1  215.86   70.39
   4  20  -1  133.76   31.75
   4  20  -1  129.08   31.58
  -4  20   1   83.52   28.09
  -4 -20   1  221.63   38.88
  -4  20   0 3632.18  257.43
  -4  20   0 3039.68  151.70
   4  20   0 3518.39  173.47
   4 -20   0 3451.28  186.95
   4 -20   0 3834.28  209.31
  -4 -20   0 3799.92  182.97
  -4  20  -1 2377.33  332.42
  -4  20  -1 1842.36  102.09
   4  20   1 1919.09  101.43
   4 -20   1 2034.99  151.14
   4 -20   1 1304.81  120.39
  -4 -20  -1 1915.40  103.35
  -4  20  -2 7586.90  641.04
   4  20   2 6606.96  379.68
  -4  20  -2 5726.72  343.02
   4 -20   2 6408.22  374.29
  -4 -20  -2 6402.70  367.04
  -4  20  -3 2831.67  371.15
   4  20   3 2339.04  144.81
  -4 -20  -3 2490.93  153.50
   4 -20   3 2519.88  200.60
   4 -20   3 2617.87  195.64
  -4  20  -4  143.38   49.56
   4  20   4  136.11   51.58
  -4 -20  -4  156.08   50.27
   4 -20   4  176.65   49.35
   4 -20   4  165.19   36.62
  -4  20  -5  853.44  169.88
   4  20   5  854.98  171.09
   4 -20   5  656.13  102.02
   4 -20   5  890.83  133.51
  -4 -20  -5  918.10  130.36
  -4  20  -6 1662.02  261.98
   4  20   6 1862.47  263.08
  -4 -20  -6 1979.10  205.46
   4 -20   6 1871.90  191.73
   4  20   7   38.40   25.38
  -4 -20  -7   27.70   30.64
   4 -20   7  173.62   52.59
   4  20   8 1584.70  129.60
  -4 -20  -8 1292.17  169.52
   4 -20   8 1166.15  254.38
   4  20   9  666.19  234.10
  -4 -20  -9 1356.74  236.12
   4 -20   9  370.37  194.95
   4 -22 -10   91.32   57.22
   4 -22  -9  109.35   37.47
   4 -22  -8  536.29   97.03
   4 -22  -7 1436.85  117.76
   4 -22  -6  812.73   83.66
   4  22  -5  604.67   98.37
   4 -22  -5  681.44  144.81
   4  22  -4 1558.08  132.09
   4 -22  -4 1575.12  186.16
   4  22  -3    7.47   29.79
  -4 -22   3   45.33   13.16
   4 -22  -3   43.26   19.24
  -4  22   2 4224.79  237.63
   4  22  -2 4399.11  256.98
  -4  22   2 4050.35  230.36
  -4 -22   2 4291.66  244.30
   4 -22  -2 4545.03  266.88
  -4  22   1  641.85  118.19
   4  22  -1  637.70  146.34
  -4  22   1  876.26   86.76
   4  22  -1 1006.47  163.26
  -4 -22   1  959.52   97.40
   4 -22  -1 1020.17  114.22
  -4  22   0  194.12   85.90
   4  22   0  142.88   38.86
   4  22   0   52.23   22.47
  -4  22   0   68.41   28.85
  -4 -22   0  152.90   35.29
  -4  22  -1   36.60   46.22
   4  22   1   60.06   28.56
  -4 -22  -1   18.63   11.14
   4 -22   1   12.46   22.20
  -4  22  -2  239.82   67.03
  -4  22  -2  331.88   56.68
   4  22   2  297.18   66.99
   4 -22   2  299.17   59.14
   4 -22   2  250.73   65.50
  -4 -22  -2  279.45   57.21
  -4  22  -3  437.70  117.40
   4  22   3  406.05   93.02
  -4 -22  -3  347.19   87.21
   4 -22   3  347.70   75.01
   4 -22   3  324.03   90.55
  -4  22  -4 1725.61  267.79
   4  22   4 1744.27  129.82
  -4 -22  -4 1962.43  143.04
   4 -22   4 2080.90  162.30
  -4  22  -5  249.38   59.40
   4  22   5  307.15   68.20
  -4 -22  -5  361.80   75.12
   4 -22   5  414.78   80.57
  -4  22  -6    9.20   21.59
   4  22   6   30.77   35.68
  -4 -22  -6   72.91   35.68
   4 -22   6   45.34   30.43
   4  22   7 1427.37  258.88
  -4 -22  -7 1893.09  190.10
   4 -22   7 1358.75  351.35
   4  22   8  125.84   51.38
  -4 -22  -8   77.16   35.04
   4 -22   8  216.85   83.88
   4  22   9  517.63  249.18
  -4 -22  -9 1173.21  207.03
   4 -22   9 1230.37  226.73
   4 -24  -9  430.70   94.74
   4 -24  -8  149.92   70.08
   4 -24  -7  774.45  144.53
   4 -24  -6  985.42   75.88
   4  24  -5  183.11   46.82
   4 -24  -5  227.71   81.85
   4  24  -4  846.68  185.48
   4 -24  -4  854.35  146.41
   4  24  -3  133.96   38.00
  -4 -24   3  155.92   43.90
   4 -24  -3  222.69   53.09
  -4 -24   3  115.78   33.47
  -4  24   2  506.91   74.37
   4  24  -2  289.25   91.11
  -4  24   2  530.25   82.24
   4  24  -2  500.30   87.70
  -4 -24   2  510.31   83.82
   4 -24  -2  681.62  168.78
   4  24  -1 4038.56  302.06
   4  24  -1 3846.78  275.54
  -4  24   1 3831.46  270.74
   4 -24  -1 3603.68  261.97
  -4 -24   1 3635.55  261.26
   4  24   0   36.94   20.77
   4  24   0    0.63   11.64
   4 -24   0   18.24   15.17
  -4 -24   0   18.00   15.49
  -4  24  -1 3161.74  440.12
  -4  24  -1 3054.32  249.08
   4  24   1 2909.73  234.22
  -4 -24  -1 3402.47  272.48
  -4  24  -2   83.96   39.52
   4  24   2   96.39   28.33
  -4 -24  -2   22.01   22.58
   4 -24   2   24.25   17.54
  -4  24  -3 1670.89  304.79
   4  24   3 2076.32  200.57
  -4 -24  -3 2208.79  159.70
   4 -24   3 2394.49  338.65
  -4  24  -4  185.71   63.77
   4  24   4  276.41   55.75
  -4 -24  -4  282.24   87.60
   4 -24   4  263.15   73.51
   4 -24   4  175.86   50.07
  -4  24  -5  417.79  101.51
   4  24   5  705.02   66.75
  -4 -24  -5  779.83   67.98
   4 -24   5  707.94  122.35
  -4  24  -6  429.60  111.63
   4  24   6  809.40  158.00
  -4 -24  -6  791.01  145.43
   4 -24   6  714.23  182.74
   4  24   7   57.09   26.81
  -4 -24  -7   79.67   38.92
   4 -24   7   48.32   36.34
   4  24   8  118.68   37.89
  -4 -24  -8  109.30   41.50
   4 -24   8  139.95   59.65
   4 -26  -9  171.39   58.47
   4 -26  -8 3777.62  325.09
   4 -26  -7   72.16   68.89
   4 -26  -6  388.57   67.15
   4  26  -5 1411.11  217.62
   4 -26  -5 1708.26  122.47
   4  26  -4 1642.69  160.45
   4 -26  -4 1665.64  165.41
  -4  26   3   27.54    8.18
   4  26  -3  102.52   37.99
   4 -26  -3   81.10   35.51
  -4 -26   3   66.50   23.45
  -4 -26   3   43.87   17.23
   4  26  -2 3264.88  226.31
  -4  26   2 3304.35  219.83
  -4  26   2 2996.52  202.78
  -4 -26   2 3204.11  216.04
   4 -26  -2 3223.11  225.50
  -4  26   1  848.02  132.29
   4  26  -1 1120.94  140.03
   4 -26  -1 1192.65  147.46
  -4 -26   1 1005.22  163.99
   4  26   0   40.44   23.85
  -4  26   0   25.53   20.75
   4 -26   0   16.99   25.81
  -4 -26   0   95.92   35.79
   4  26   1  159.99   44.06
  -4  26  -1  204.62   51.97
   4 -26   1  208.65   51.08
  -4 -26  -1  176.57   43.25
   4  26   2  215.16   60.26
  -4 -26  -2  270.93   67.95
   4 -26   2  248.42   67.39
  -4  26  -3  684.98  238.83
   4  26   3 1104.95  133.26
  -4 -26  -3 1149.73  106.56
   4 -26   3  653.83  168.60
  -4  26  -4 3149.55  377.83
  -4 -26  -4 4381.85  265.56
   4 -26   4 4037.05  403.48
  -4  26  -5  126.88   48.19
   4  26   5  320.98   54.79
  -4 -26  -5  253.07   76.05
   4 -26   5  370.00   94.99
   4  26   6  772.07  240.16
  -4 -26  -6  938.13  199.64
   4 -26   6  728.97  232.76
   4  26   7  310.86   79.15
   4 -26   7  520.17  146.72
  -4 -26  -8   82.14   37.49
   4 -26   8  159.06   50.83
   4 -28  -8  115.03   46.25
   4  28  -7  401.41  170.34
   4 -28  -7  570.12  126.85
   4  28  -6   51.91   25.94
   4  28  -5   68.49   31.89
   4 -28  -5  108.05   62.39
   4  28  -4   46.74   28.02
   4 -28  -4   24.13   33.89
   4  28  -3  373.70   80.51
  -4 -28   3  339.72   48.62
   4 -28  -3  304.41   52.41
   4  28  -2 1175.25  183.67
  -4  28   2 1248.71  109.78
   4 -28  -2 1511.29  152.02
  -4 -28   2 1313.42   38.83
  -4  28   1   73.32   35.19
   4  28  -1   33.22   22.44
   4  28  -1   62.07   27.38
  -4  28   1   68.61   21.10
  -4 -28   1   21.97   13.20
   4 -28  -1   96.30   43.49
  -4  28   0  498.82  101.88
   4  28   0  601.40  159.36
   4 -28   0  927.02   75.42
  -4 -28   0  755.46  125.57
   4  28   1  435.87  122.52
  -4 -28  -1  425.48  107.83
   4 -28   1  517.30   91.78
   4  28   2  103.06   32.58
  -4 -28  -2  119.89   33.15
   4 -28   2   82.33   20.40
  -4 -28  -3  338.74   36.89
   4 -28   3  297.58   59.05
   4 -28   3  311.57   63.10
   4  28   4  118.14   36.94
   4 -28   4  176.00   33.11
   4 -28   4   57.22   47.20
  -4 -28  -4  242.48   44.60
   4  28   5 1644.58  218.87
   4 -28   5 1204.51  322.91
  -4 -28  -6  238.82  124.30
   4 -28   6  297.18  112.83
   4  28   7  245.02   65.03
  -4 -28  -7  327.51   76.86
   4 -28   7  125.12   62.03
   4  30  -7  542.94  113.07
   4 -30  -7  442.10   98.85
   4  30  -6  537.62  117.42
   4 -30  -6  390.34  161.96
   4  30  -5 1820.75  132.81
   4 -30  -5 1892.52  147.74
   4  30  -4   95.93   37.77
   4 -30  -4  157.90   54.76
   4 -30  -3 1462.29  165.56
   4  30  -2 4821.46  288.45
  -4 -30   2 4599.24  268.56
   4 -30  -2 4484.83  293.74
   4  30  -1   81.37   23.41
  -4  30   1   80.85   19.93
   4 -30  -1   82.33   26.51
  -4 -30   1   95.69   27.81
  -4  30   0  393.52  111.00
   4  30   0  541.10  102.82
   4 -30   0  536.39  109.62
  -4 -30   0  656.55   53.29
   4  30   1 2441.80  152.62
  -4 -30  -1 2673.43  166.72
   4 -30   1 2614.26  163.90
   4  30   2  190.12   38.72
  -4 -30  -2  141.67   32.21
   4 -30   2  180.72   44.85
   4  30   3   36.27   21.35
  -4 -30  -3   57.12   20.61
   4 -30   3   39.51   20.58
   4  30   4 2798.43  262.34
  -4 -30  -4 3207.65  297.45
   4 -30   4 2223.22  320.40
   4  30   5  442.66   59.45
   4 -30   5  234.17   84.42
  -4 -30  -6    0.80   25.33
   4 -30   6   54.46   44.82
  -4 -30  -7  532.07  264.90
   4 -30   7  479.37  287.70
   4  32  -6  687.56  173.69
   4 -32  -6 1092.71  197.88
   4  32  -5  644.72  209.46
   4 -32  -5  717.80  180.33
   4  32  -4 1380.22  157.72
   4 -32  -4 1497.68  130.24
   4  32  -3  178.19   48.18
   4 -32  -3   77.52   33.86
   4  32  -2   76.11   23.66
   4 -32  -2  121.19   44.15
  -4  32   1   27.04   12.50
   4  32  -1   82.86   28.90
  -4 -32   1   73.63   27.90
   4  32   0  657.73   69.26
  -4  32   0  692.37   84.35
   4 -32   0  691.13  181.76
  -4  32  -1 1911.82  177.07
   4  32   1 2106.69  198.36
   4 -32   1 2082.82  207.32
  -4 -32  -1 2125.08  199.95
   4  32   2 1806.80  222.42
  -4 -32  -2 1749.91  168.93
   4  32   3   92.81   42.33
   4 -32   3   28.97   14.48
  -4 -32  -4   30.28   20.43
  -4 -32  -5  203.32   55.08
   4 -32   6  402.12  176.68
   4  34  -5 1072.92  218.39
   4 -34  -5 1458.34  252.21
   4  34  -4   49.97   29.15
   4 -34  -4   64.25   24.36
   4  34  -3   65.74   22.02
   4 -34  -3  114.53   49.62
   4  34  -2  666.93  179.27
   4 -34  -2  968.09  137.53
   4  34  -1  202.57   37.06
  -4 -34   1  144.45   76.86
   4 -34  -1  117.64   68.08
   4  34   0    1.47   23.94
  -4  34   0   14.72   13.53
   4 -34   0    0.98   23.20
   4  34   1 1329.03  240.52
  -4 -34  -1 1856.91  132.21
   4 -34   1 1700.44  161.35
   4  34   2    9.92   26.10
  -4 -34  -2   30.16   24.78
   4  34   3   46.74   24.39
  -4 -34  -3   54.61   48.16
   4  34   4   45.60   25.48
  -4 -34  -4   82.63   53.16
   4  36  -4 4058.54  665.88
   4 -36  -4 3993.02  657.41
   4  36  -3  -12.31   30.74
   4 -36  -3   55.79   28.07
   4  36  -2  -33.06   26.27
   4 -36  -2   99.51   49.81
   4  36  -1   33.35   28.43
   4 -36  -1   11.53   34.12
  -4 -36   0 1426.77  130.50
   4 -36   0 1406.84  133.64
   4  36   1   77.56   40.63
  -4  36  -1  113.25   29.24
   4 -36   1  138.92   41.31
   4  36   2 1078.55  245.21
  -4 -36  -2 1341.07  230.55
   4  36   3   38.55   19.15
  -4 -36  -3  118.42   48.92
   4  38  -2 1331.39  229.71
   4 -38  -2 1566.77  273.59
   4  38   0  203.46   54.03
   4 -38   0  172.68   69.63
   4  38   1   41.12   27.49
   5   1 -10  128.04   51.75
   5   1  -9 1834.36  172.89
   5  -1  -9 1722.93  165.06
   5   1  -8  134.13   37.53
   5  -1  -8  162.36   45.02
   5   1  -7  908.35  110.04
   5   1  -7 1253.78  126.04
   5  -1  -7  568.00  184.10
   5  -1  -7 1089.04  145.67
   5   1  -6  426.10   80.62
   5   1  -6  466.31   34.38
   5   1  -6  430.13   67.26
   5  -1  -6  493.45   45.27
   5  -1  -6  514.69   49.08
  -5   1   5   71.19   27.08
   5   1  -5   18.42   17.67
   5   1  -5   15.40   19.25
   5  -1  -5   43.25   26.02
  -5  -1   5  134.26   62.43
   5  -1  -5   30.65   17.00
   5   1  -4 3202.85  101.74
  -5   1   4 4393.19  456.80
   5   1  -4 3088.73  106.09
   5   1  -4 4239.17  155.80
   5  -1  -4 3445.23  114.26
   5  -1  -4 3884.80  143.07
   5  -1  -4 3459.36  105.57
  -5  -1   4 3571.71  283.79
   5   1  -3 4959.72  102.73
   5   1  -3 4462.72  102.28
   5  -1  -3 4191.61  101.91
  -5  -1   3 4784.76  177.57
  -5   1   210017.74  228.22
   5   1  -2 9929.22  185.43
   5   1  -210581.21  207.59
  -5   1   2 9771.32  182.58
  -5  -1   210456.94  245.50
   5  -1  -2 9428.08  181.56
   5  -1  -2 9349.62  190.07
  -5  -1   2 9717.97  182.89
  -5   1   1 5258.55  103.07
   5   1  -1 4827.62  102.97
   5  -1  -1 5341.34  109.40
  -5  -1   1 4831.87  110.48
  -5  -1   1 5545.18  108.94
  -5   1   0  222.95   22.13
  -5   1   0  315.04   58.96
   5   1   0  271.72   41.27
   5   1   0  215.60   31.15
  -5  -1   0  301.43   30.09
   5  -1   0  298.12   44.59
   5  -1   0  294.21   55.90
  -5  -1   0  223.90   21.51
  -5   1  -1  716.56   61.53
   5   1   1  671.06   62.60
   5   1   1  550.20   44.53
  -5   1  -1  585.61   78.30
   5  -1   1  596.07   92.40
   5  -1   1  487.40   52.01
  -5  -1  -1  534.69   46.05
  -5  -1  -1  497.75  104.92
  -5   1  -2 8326.16  167.22
   5   1   2 8701.06  186.41
   5   1   2 8197.21  161.65
   5  -1   2 8608.55  168.39
  -5  -1  -2 8665.83  173.97
   5  -1   2 8628.43  183.37
  -5  -1  -2 7783.18  158.64
  -5   1  -3   50.45   17.43
   5   1   3   44.53   20.24
   5   1   3   36.56   26.45
  -5   1  -3   98.55   21.83
  -5  -1  -3   33.44   18.95
   5  -1   3  119.23   38.54
   5  -1   3   83.54   14.42
  -5  -1  -3  107.79   28.56
  -5   1  -4 5913.30  199.29
  -5   1  -4 6029.63  209.14
   5   1   4 5679.05  191.66
   5   1   4 6372.84  232.74
   5  -1   4 5673.96  190.52
  -5  -1  -4 6118.24  209.52
  -5  -1  -4 6264.76  216.75
   5  -1   4 6273.01  226.69
   5   1   5 4826.49  265.96
  -5   1  -5 4936.89  258.58
   5  -1   5 4800.60  251.52
  -5  -1  -5 5360.43  280.91
   5  -1   5 5007.97  277.81
  -5   1  -6   45.38   21.46
   5   1   6   85.49   51.28
  -5  -1  -6   61.84   24.36
   5  -1   6   86.12   52.53
  -5   1  -7  339.55   64.18
   5   1   7  322.30   73.84
  -5  -1  -7  413.52   98.89
   5  -1   7  378.56   73.73
   5   1   8  752.51  118.77
  -5   1  -8  971.14   89.19
   5  -1   8 1020.55  112.92
  -5  -1  -8 1030.48  148.08
  -5   1  -9  106.71   56.48
   5   1   9   34.32   57.41
  -5  -1  -9   16.66   25.90
  -5   1 -10  189.95   50.41
   5   1  10  192.62   82.46
  -5  -1 -10   35.22   24.53
   5  -1  10  128.66   87.81
   5   1  11  511.48  141.74
   5  -1  11  203.43  193.60
   5  -3 -11 1019.77   99.42
   5  -3 -10  606.22   74.66
   5   3  -9  405.20   62.48
   5  -3  -9  419.03  114.29
   5   3  -8  320.31  112.89
   5   3  -8  971.34  133.95
   5  -3  -8 1107.94  125.48
   5   3  -7  108.34   44.52
   5   3  -7  180.12   41.11
   5   3  -7   80.74   45.40
   5  -3  -7   72.97   35.03
   5  -3  -7   86.85   28.90
   5  -3  -7  132.96   36.27
   5   3  -6  175.80   57.87
   5   3  -6  140.76   25.52
   5   3  -6  120.40   43.31
   5  -3  -6   88.00   41.06
   5  -3  -6  138.00   32.12
   5  -3  -6  113.54   31.09
   5   3  -5 4425.28  158.68
  -5   3   5 4613.41  291.54
   5  -3  -5 4375.57  174.25
  -5  -3   5 4447.48  243.54
   5  -3  -5 4510.27  155.05
   5   3  -4 6283.11  188.40
  -5   3   4 6237.42  246.71
   5   3  -4 5835.17  190.03
   5   3  -4 5405.93  184.81
   5  -3  -4 6361.41  193.63
   5  -3  -4 6395.65  253.45
   5  -3  -4 6052.57  176.55
  -5  -3   4 5659.58  212.74
  -5   3   3  147.28   48.76
   5   3  -3  158.68   30.61
   5   3  -3  125.68   28.86
   5  -3  -3  132.89   28.21
   5  -3  -3  164.20   32.92
  -5  -3   3   72.80   61.58
  -5   3   218883.08  380.62
   5   3  -220419.75  368.64
  -5   3   220671.51  368.04
  -5  -3   219659.41  355.46
  -5   3   1  221.92   40.52
  -5   3   1  193.99   37.35
   5   3  -1  182.69   37.19
   5   3  -1  254.36   42.75
  -5  -3   1  280.91   62.30
   5  -3  -1  262.73   45.64
   5  -3  -1  218.14   31.19
  -5  -3   1  269.85   47.18
  -5   3   0 2695.91   84.76
  -5   3   0 2952.14   69.60
   5   3   0 2921.90   68.39
   5   3   0 2968.72   80.32
   5  -3   0 2900.92   74.46
  -5  -3   0 2702.58   68.26
  -5  -3   0 2828.02   66.89
  -5   3  -1 3261.14   93.46
   5   3   1 3152.35   73.38
   5   3   1 2754.05   80.35
  -5  -3  -1 2949.19   71.63
   5  -3   1 3083.07   73.24
   5  -3   1 2733.67   78.75
  -5  -3  -1 3213.02   82.41
  -5   3  -2 1361.35  128.00
  -5   3  -2 1080.76   81.05
   5   3   2 1050.70  108.81
   5   3   2 1210.64  101.10
   5  -3   2 1231.42  133.52
   5  -3   2 1485.92  218.39
  -5  -3  -2 1097.55   78.69
  -5  -3  -2 1045.99   74.60
  -5   3  -3 3265.00  108.12
   5   3   3 3380.41  111.91
   5   3   3 3286.09  142.77
  -5   3  -3 3565.21  125.21
  -5  -3  -3 3614.62  118.86
   5  -3   3 3372.84  129.96
   5  -3   3 3545.99  115.53
  -5  -3  -3 3001.95  105.31
  -5   3  -410412.18  336.77
  -5   3  -410415.64  346.31
   5   3   410767.75  348.76
   5   3   4 9536.21  320.29
  -5  -3  -410961.17  357.83
   5  -3   410483.96  355.94
   5  -3   410450.95  336.51
  -5  -3  -4 8836.91  300.11
  -5   3  -5    7.12   19.28
   5   3   5   97.25   34.64
   5  -3   5   29.30   15.77
  -5  -3  -5   34.17   17.99
   5  -3   5   66.66   32.90
  -5   3  -6 7592.00  431.85
   5   3   6 7432.77  460.18
  -5  -3  -6 7341.56  419.57
   5  -3   6 7266.53  429.24
  -5   3  -7   58.66   31.15
   5   3   7  110.62   43.86
  -5  -3  -7  114.41   40.51
   5  -3   7  114.78   50.03
  -5   3  -8  135.72   33.55
   5   3   8  177.58   63.27
   5  -3   8  247.49   69.65
  -5   3  -9  335.17  108.84
   5   3   9  475.00  191.92
  -5  -3  -9  285.04  108.94
   5  -3   9  649.15   97.75
  -5   3 -10  789.22  152.44
   5   3  10 1002.26  225.79
  -5  -3 -10 1255.77  118.98
   5  -3  10 1177.82  221.60
   5   3  11  -22.42   58.77
   5  -3  11   68.18   68.20
   5  -5 -10  218.42   65.56
   5   5  -9 2524.08  232.02
   5  -5  -9 2537.77  242.57
   5   5  -8 3954.57  278.75
   5   5  -8 3501.47  245.89
   5  -5  -8 3879.83  267.71
   5  -5  -8 3121.67  216.76
   5   5  -7 1769.98  337.75
   5   5  -7 1583.97  169.39
   5  -5  -7 1777.86  320.97
   5  -5  -7 1480.92  161.28
   5   5  -6   87.47   25.95
   5   5  -6  200.88   41.47
   5   5  -6  172.35   34.83
   5  -5  -6  135.15   54.58
   5  -5  -6  244.80   48.73
  -5   5   5 5819.48  239.89
   5   5  -5 6033.99  227.00
   5   5  -5 5329.24  179.11
   5  -5  -5 5107.82  194.84
  -5  -5   5 5917.09  242.86
   5  -5  -5 5389.33  179.55
   5  -5  -5 5549.67  179.53
  -5   5   4 1707.10  241.70
   5   5  -4 1430.14   58.07
   5   5  -4 1434.13  106.44
   5   5  -4 1668.94   82.97
  -5  -5   4 1720.07  124.01
   5  -5  -4 1465.08   85.27
   5  -5  -4 1447.45   50.75
   5  -5  -4 1438.97   57.69
  -5   5   311180.47  365.24
   5   5  -310074.72  293.17
  -5  -5   311716.69  355.60
   5  -5  -310055.20  286.77
   5  -5  -310958.97  343.24
  -5   5   2 2567.57  180.07
   5   5  -2 2582.27   68.65
   5   5  -2 2512.32   75.43
  -5   5   2 2551.15   53.36
   5  -5  -2 2570.77   57.98
  -5  -5   2 2306.44   66.94
  -5  -5   2 2636.66   71.35
  -5   5   130887.14  591.96
   5   5  -129582.04  528.95
   5   5  -128452.65  509.48
  -5  -5   126850.76  482.01
   5   5   0 1291.98   89.25
  -5   5   0 1056.87  135.02
  -5   5   0 1144.18   78.53
   5   5   0 1385.67   99.76
   5  -5   0 1215.98   98.40
  -5  -5   0 1249.79   86.34
   5  -5   0 1533.97  107.43
  -5  -5   0 1358.33  105.60
  -5   5  -1  751.07  113.03
  -5   5  -1  908.75   71.88
   5   5   1  705.13   51.81
   5   5   1  675.12   60.35
   5  -5   1  785.64   87.28
   5  -5   1  753.51   64.11
  -5  -5  -1  674.04   52.23
  -5  -5  -1  654.06   52.59
  -5   5  -2  435.50   68.55
   5   5   2  334.81   48.72
   5   5   2  233.09   26.10
  -5   5  -2  268.78   76.64
  -5  -5  -2  265.43   31.98
   5  -5   2  377.06   46.98
   5  -5   2  343.77   56.82
  -5  -5  -2  277.06   33.84
   5   5   3 5020.18  173.03
   5   5   3 5321.03  188.19
  -5  -5  -3 5567.86  188.75
   5  -5   3 5467.42  236.63
   5  -5   3 5433.26  185.15
  -5  -5  -3 5200.75  176.87
  -5   5  -4 1344.09   87.65
   5   5   4 1151.24  155.80
  -5  -5  -4 1471.24   71.73
   5  -5   4 1418.54  111.12
   5  -5   4 1290.24   97.62
  -5  -5  -4 1177.32  114.66
  -5   5  -5 5372.82  255.70
   5   5   5 5723.94  288.74
   5  -5   5 5373.85  254.08
  -5  -5  -5 5333.07  257.80
   5  -5   5 5446.63  276.54
  -5   5  -6  266.03   63.32
   5   5   6  443.79   92.00
  -5  -5  -6  273.02   69.78
   5  -5   6  277.34   58.08
   5  -5   6  357.41   80.20
  -5   5  -7   76.26   25.09
   5   5   7   95.54   40.11
  -5  -5  -7   80.17   34.60
   5  -5   7  143.29   76.70
  -5   5  -8   40.39   15.34
   5   5   8   49.10   46.16
  -5  -5  -8   18.53   18.89
   5  -5   8   78.33   49.68
   5   5   9 1699.93  190.92
  -5  -5  -9 1382.17  148.03
   5  -5   9 1466.03  173.63
  -5   5 -10 1536.77  138.06
   5   5  10 1611.56  173.81
  -5  -5 -10 1695.81  153.08
   5  -5  10  970.40  377.14
   5   5  11  481.58  136.77
  -5  -5 -11  327.94  135.38
   5  -5  11  532.90  121.84
   5  -7 -11  305.31  175.78
   5  -7 -10  221.10   58.32
   5   7  -9   42.01   18.63
   5  -7  -9   50.64   32.55
   5  -7  -8  129.03   40.04
   5  -7  -8   81.58   35.32
   5   7  -7    9.79   11.67
   5   7  -7   28.90   10.32
   5  -7  -7   53.63   21.40
   5  -7  -7   15.65   19.69
   5   7  -6   56.68   24.01
   5   7  -6   91.16   19.41
   5  -7  -6  251.86   54.21
   5  -7  -6  103.30   22.90
   5   7  -5 1367.22   92.14
  -5   7   5 1270.42  126.11
   5   7  -5  932.12  145.24
   5  -7  -5  803.69  183.82
  -5  -7   5 1314.66  187.40
   5  -7  -5 1211.33   76.01
   5  -7  -5 1109.89   59.32
  -5   7   4  386.97   75.65
   5   7  -4  156.90   35.92
   5   7  -4  213.62   25.57
   5   7  -4  246.20   49.85
  -5  -7   4  206.63   34.20
   5  -7  -4  175.52   30.83
   5  -7  -4  180.25   28.32
   5  -7  -4  190.68   57.71
  -5   7   3  776.01  169.50
   5   7  -3  698.76   92.41
   5   7  -3  634.67   93.38
   5  -7  -3  657.42  102.53
  -5  -7   3  776.47   79.65
   5  -7  -3  555.83   57.17
   5  -7  -3  577.97   56.70
   5   7  -2 1182.73   79.96
  -5   7   2 1027.02  120.10
   5   7  -2 1190.53   86.41
  -5   7   2 1281.39   84.49
   5  -7  -2 1283.08   93.68
  -5  -7   2 1230.28  132.20
   5  -7  -2 1471.93  116.91
  -5   7   1 3240.89  114.20
   5   7  -1 3238.61   79.46
   5   7  -1 3465.49   76.78
   5  -7  -1 3117.61   73.43
   5  -7  -1 2813.78   77.15
  -5  -7   1 3293.44   76.13
  -5   7   0 1470.29  210.75
  -5   7   0 1172.47   83.02
   5   7   0 1053.03  117.17
   5   7   0 1184.68   86.03
   5  -7   0  884.08   66.84
   5  -7   0 1082.35  132.00
  -5  -7   0  998.10   70.36
  -5  -7   0  979.08   68.14
  -5   7  -1 2194.24  190.70
  -5   7  -1 2737.69   76.91
   5   7   1 2588.60   67.24
   5   7   1 2555.37   75.86
   5  -7   1 2732.17   79.29
  -5  -7  -1 2832.91   71.13
  -5  -7  -1 2583.01   63.74
  -5   7  -2  108.81   36.22
   5   7   2   92.71   25.41
   5   7   2   67.60   17.85
  -5   7  -2   88.12   32.28
  -5  -7  -2  140.22   26.29
   5  -7   2  109.38   17.63
  -5  -7  -2  176.57   32.35
   5  -7   2  125.77   52.44
  -5   7  -3   68.66   23.24
  -5   7  -3   57.18   24.80
   5   7   3   56.80   36.92
   5  -7   3   49.12   29.99
   5  -7   3   15.02   10.86
  -5  -7  -3   -4.81   22.62
  -5  -7  -3   64.46   29.08
   5   7   4 4462.95  165.62
  -5  -7  -4 4587.70  160.49
   5  -7   4 5082.54  191.13
   5  -7   4 4472.36  151.84
  -5  -7  -4 4292.80  150.90
  -5   7  -5 1345.54  129.76
   5   7   5 1296.56  259.54
  -5  -7  -5 1438.85   82.20
   5  -7   5 1746.18  250.45
   5  -7   5 1338.95  129.36
  -5   7  -6   19.46   11.39
   5   7   6   45.11   36.17
   5  -7   6   49.94   19.94
   5  -7   6   73.81   49.88
  -5  -7  -6   32.59   25.08
  -5   7  -7  996.46  178.47
   5   7   7 1075.97  132.57
  -5  -7  -7 1232.22   99.84
   5  -7   7 1194.71  140.58
  -5   7  -8  268.74   84.02
   5   7   8  379.22   88.24
  -5  -7  -8  429.79   54.51
   5  -7   8  458.93   77.44
  -5   7  -9  377.23  142.11
   5   7   9  693.44  127.48
  -5  -7  -9  574.82  120.81
   5  -7   9  727.04  154.67
  -5   7 -10   53.56   20.96
  -5  -7 -10   85.09   44.50
   5  -7  10  115.75   59.31
   5  -9  -9  331.30   42.00
   5   9  -8 2214.00  173.68
   5   9  -8 2220.89  171.13
   5  -9  -8 2400.44  196.99
   5  -9  -8 1885.74  166.84
   5   9  -7   48.31   20.44
   5   9  -7  171.26   51.04
   5  -9  -7  218.80   69.55
   5  -9  -7   79.66   22.19
   5   9  -6   25.79   13.82
   5   9  -6   63.38   16.50
   5  -9  -6   32.53   30.36
   5  -9  -6   68.77   21.11
   5  -9  -6   82.88   23.71
   5   9  -5  567.35   59.78
   5   9  -5  370.80   51.92
   5  -9  -5  731.01  113.57
  -5  -9   5  452.71   59.94
   5  -9  -5  386.38   46.02
   5  -9  -5  443.06   24.62
  -5   9   4 1837.66  324.00
   5   9  -4 1680.08  181.25
   5   9  -4 2048.18   71.32
   5   9  -4 1970.06   80.86
  -5  -9   4 2329.61  156.81
   5  -9  -4 2081.84   68.30
   5  -9  -4 1970.80   63.13
   5  -9  -4 1930.71  267.53
  -5   9   3  249.81   55.23
   5   9  -3  339.44   41.59
   5   9  -3  280.87   45.41
   5  -9  -3  350.53   93.71
  -5  -9   3  311.94   38.08
   5  -9  -3  247.94   17.35
   5  -9  -3  172.60   24.83
  -5   9   2  976.43  112.02
   5   9  -2 1092.76   96.52
   5   9  -2 1121.92  102.88
  -5   9   2 1180.74   73.22
   5  -9  -2 1185.41  101.53
   5  -9  -2 1090.76   93.38
  -5  -9   2 1312.12  103.21
  -5   9   1 4791.91  192.51
  -5   9   1 5304.24  155.28
   5   9  -1 5457.95  163.18
   5   9  -1 5383.47  168.08
   5  -9  -1 5615.64  169.24
  -5  -9   1 5555.85  169.07
  -5  -9   1 5438.75  164.31
  -5   9   0  576.38   82.08
   5   9   0  357.60   72.37
  -5   9   0  391.12   42.31
   5   9   0  382.71   64.63
   5  -9   0  284.23   77.73
  -5  -9   0  504.59   78.41
  -5  -9   0  443.49   47.94
   5  -9   0  437.24   84.24
  -5   9  -1  214.83   44.55
  -5   9  -1   44.63   31.51
   5   9   1  141.68   22.87
   5   9   1  193.14   37.27
   5  -9   1  105.80   24.32
   5  -9   1  186.66   34.25
  -5  -9  -1  207.50   41.63
  -5  -9  -1  125.04   26.07
  -5   9  -2 1906.60   90.08
  -5   9  -2 2145.92  153.09
   5   9   2 2180.78  100.56
   5   9   2 1718.71   68.58
   5  -9   2 2066.15   87.43
   5  -9   2 1863.39   82.06
  -5  -9  -2 2162.97   76.95
  -5  -9  -2 2115.70   74.53
  -5   9  -3 1386.70  121.76
   5   9   3 1437.14   73.47
   5   9   3 1239.87   57.29
  -5   9  -3  803.39  103.39
   5  -9   3 1291.17   84.51
   5  -9   3  987.10   80.11
  -5  -9  -3 1186.74  116.40
  -5  -9  -3 1264.36   83.53
  -5   9  -4   32.63   21.80
   5   9   4   80.54   37.04
   5  -9   4   17.06   13.43
   5  -9   4   62.33   37.28
  -5  -9  -4   27.04   19.98
  -5  -9  -4   21.26   18.14
  -5   9  -5  223.77   54.26
   5   9   5  206.58   58.34
  -5  -9  -5  299.54   70.55
   5  -9   5  362.96   73.07
   5  -9   5  219.17   43.36
  -5   9  -6 1511.68  255.54
   5   9   6 1249.91  153.17
  -5  -9  -6 1241.92  162.37
   5  -9   6 1324.79  219.74
   5  -9   6  837.28  140.66
  -5   9  -7  284.64   82.20
   5   9   7  358.46   68.04
  -5  -9  -7  372.39   61.46
   5  -9   7  390.22  104.16
  -5   9  -8  716.45  143.03
   5   9   8  937.14  196.09
  -5  -9  -8 1081.36   69.20
   5  -9   8  979.88  229.50
  -5   9  -9   52.39   32.48
   5   9   9  188.65   72.46
  -5  -9  -9  276.13   69.07
   5  -9   9  269.29  101.71
  -5   9 -10   69.52   30.84
   5   9  10  229.23   90.61
  -5  -9 -10  288.30   67.46
   5  -9  10  335.61  134.63
   5 -11 -11 2945.08  514.26
   5 -11 -10  208.73   68.38
   5 -11  -9   68.05   33.16
   5  11  -8  102.65   33.08
   5 -11  -8  146.15   61.10
   5  11  -7 1226.57  172.61
   5  11  -7 1130.41  159.27
   5 -11  -7 1344.87  120.50
   5 -11  -7 1236.35  183.37
   5  11  -6 4412.23  248.50
   5  11  -6 4114.21  232.20
   5 -11  -6 4380.52  258.33
   5 -11  -6 4400.80  247.79
   5 -11  -6 4217.32  235.97
   5  11  -5 8972.30  410.69
  -5 -11   511449.88  554.93
   5 -11  -511796.29  550.09
  -5  11   4  578.11  140.84
   5  11  -4  557.03  114.21
   5  11  -4  632.73   86.47
   5  11  -4  798.93   91.20
  -5 -11   4  757.17   92.82
   5 -11  -4  552.10   97.03
  -5  11   312443.91  483.19
   5  11  -313115.43  417.08
  -5 -11   311651.63  370.17
  -5  11   2  310.93   71.66
   5  11  -2  207.00   30.56
   5  11  -2  193.08   18.74
  -5  11   2  226.74   22.85
   5 -11  -2  201.22   36.24
   5 -11  -2  216.51   26.54
  -5 -11   2  210.63   25.88
  -5  11   1  834.99  175.84
  -5  11   1  637.26   65.48
   5  11  -1  666.43   70.64
   5  11  -1  712.67   67.99
   5 -11  -1 1067.72  196.22
   5 -11  -1  754.70   81.35
  -5 -11   1  707.25   65.38
  -5 -11   1  816.19   82.69
  -5  11   0  137.91   36.31
  -5  11   0  264.40   33.06
   5  11   0  264.33   32.71
   5  11   0  295.99   49.04
   5 -11   0  306.11   51.22
   5 -11   0  375.37   42.34
  -5 -11   0  243.66   30.76
  -5 -11   0  347.95   38.18
  -5  11  -121086.72  629.45
  -5  11  -119645.39  569.02
   5  11   120482.59  590.23
   5  11   121530.96  620.26
   5 -11   122466.39  658.19
   5 -11   122215.98  643.82
  -5 -11  -121090.52  609.14
  -5 -11  -121291.41  609.49
  -5  11  -2 2828.49  235.32
  -5  11  -2 2043.46  105.51
   5  11   2 2388.61   91.43
   5  11   2 2220.63   88.90
   5 -11   2 2135.30  125.50
   5 -11   2 2202.25   97.37
  -5 -11  -2 2316.03   87.98
  -5 -11  -2 2229.74   82.55
  -5  11  -3 4295.39  154.49
   5  11   3 6008.36  213.22
  -5  11  -3 4565.34  166.07
   5 -11   3 5236.07  254.99
   5 -11   3 5210.76  174.63
  -5 -11  -3 5201.40  179.16
  -5 -11  -3 4905.53  166.89
  -5  11  -4    1.81   19.44
   5  11   4   61.68   41.20
  -5 -11  -4    7.80   18.94
   5 -11   4  -56.03   34.17
   5 -11   4   13.65    9.57
  -5  11  -5 2431.90  244.97
   5  11   5 1982.36  197.05
   5 -11   5 2134.37  129.84
   5 -11   5 2593.67  248.49
  -5 -11  -5 2229.67  138.93
  -5  11  -6   26.91   18.37
   5  11   6   39.90   40.04
  -5 -11  -6   51.37   29.49
   5 -11   6   36.24   43.52
   5 -11   6   25.41   14.72
  -5  11  -7 4901.97  380.06
   5  11   7 4298.67  349.43
  -5 -11  -7 4112.96  327.55
   5 -11   7 4268.14  350.80
   5  11   8 2331.50  161.62
  -5 -11  -8 2443.83  158.02
   5 -11   8 2118.94  175.64
   5  11   9 2181.44  277.61
  -5 -11  -9 2026.95  144.13
   5 -11   9 1960.12  170.78
   5  11  10   44.04   44.90
  -5 -11 -10  124.82   46.55
   5 -11  10  134.65   72.13
   5 -13 -11  197.70   95.60
   5 -13 -10  459.43  144.36
   5 -13  -9   73.76   34.44
   5 -13  -8 1246.63  114.01
   5 -13  -7  259.31   72.13
   5 -13  -7  117.35   29.96
   5 -13  -7  258.32   55.22
   5  13  -6 2398.35  169.40
   5 -13  -6 2517.83  189.69
   5  13  -5 5444.30  260.76
   5  13  -5 5519.66  253.41
   5 -13  -5 5319.05  258.46
  -5 -13   5 5255.18  272.25
  -5  13   4 4542.42  301.94
   5  13  -4 3886.14  198.60
   5  13  -4 3924.35  209.37
  -5 -13   4 4209.19  303.93
  -5  13   3 1329.41  190.92
   5  13  -3  971.72  197.29
   5  13  -3 1056.27  116.61
   5  13  -3 1131.50  106.44
   5 -13  -3 1144.99  139.35
  -5 -13   3 1168.79  111.80
  -5  13   2   92.69   62.24
  -5  13   2    5.67    3.11
   5  13  -2   -4.01    9.55
   5  13  -2   -1.22   18.48
   5 -13  -2   49.78   38.26
   5 -13  -2   15.60    4.90
  -5 -13   2    6.73   10.65
  -5  13   1  488.83   94.07
  -5  13   1  306.76   26.07
   5  13  -1  295.28   41.37
   5  13  -1  381.68   67.64
   5 -13  -1  356.89   73.61
   5 -13  -1  277.27   36.04
  -5 -13   1  289.00   30.16
  -5 -13   1  329.19   56.12
  -5  13   0 2202.68  119.73
  -5  13   0 2206.28   82.79
   5  13   0 2542.27  156.92
   5  13   0 2378.91   89.04
   5 -13   0 1984.81   88.06
   5 -13   0 2494.34  106.87
  -5 -13   0 2362.53   86.98
  -5 -13   0 2417.26   88.16
  -5  13  -1 1734.11  101.69
  -5  13  -1 1252.42   77.20
   5  13   1 1379.65   58.67
   5  13   1 1440.23   69.36
   5 -13   1 1381.37   66.54
   5 -13   1 1589.40   73.26
  -5 -13  -1 1375.57   61.16
  -5 -13  -1 1404.84   56.77
  -5  13  -2 5555.68  212.46
  -5  13  -2 4838.62  176.95
   5  13   2 4619.20  162.29
   5  13   2 4715.86  166.68
   5 -13   2 4802.30  178.40
  -5 -13  -2 4910.54  171.77
  -5 -13  -2 4698.56  167.82
  -5  13  -3 2297.32  145.08
  -5  13  -3 1648.77  130.74
   5  13   3 1590.12   97.64
   5 -13   3 2022.13  124.62
   5 -13   3 1833.42  106.91
  -5 -13  -3 1879.80  107.32
  -5 -13  -3 1655.80   93.09
  -5  13  -4  245.73   64.04
   5  13   4  291.98   58.51
  -5 -13  -4  469.80   75.99
   5 -13   4  415.64   86.59
   5 -13   4  311.02   48.29
  -5  13  -5  284.94   48.38
   5  13   5  304.78   51.10
   5 -13   5  334.83   48.40
   5 -13   5  388.97   62.22
  -5 -13  -5  306.19   53.32
  -5  13  -6  958.93  181.30
   5  13   6 1503.72  231.34
  -5 -13  -6 1191.81  102.62
   5 -13   6 1253.31  125.87
   5 -13   6  950.08  150.94
  -5  13  -7 3721.69  348.68
   5  13   7 4255.83  400.29
  -5 -13  -7 4237.07  394.36
   5 -13   7 4345.54  543.68
   5  13   8  947.12  260.40
  -5 -13  -8 1244.41  149.53
   5 -13   8 1358.51  162.40
   5  13   9   79.84   34.39
  -5 -13  -9   38.55   28.32
   5 -13   9   72.46   60.44
   5  13  10  123.43   67.92
  -5 -13 -10  167.54   41.38
   5 -13  10  326.14   98.13
   5 -15 -11   50.00   33.46
   5 -15 -10  224.68   53.39
   5 -15  -9   53.68   42.61
   5 -15  -8  440.28   53.90
   5 -15  -7  259.04   47.75
   5 -15  -6   75.48   38.28
   5  15  -5 5029.04  281.02
   5  15  -5 4790.89  278.61
   5 -15  -5 4955.59  306.39
   5  15  -4 1377.77  158.72
   5  15  -4 1201.21  211.48
   5 -15  -4 1340.33   78.36
  -5 -15   4 1285.23  227.89
  -5  15   3   58.74   42.25
   5  15  -3   51.99   12.68
   5  15  -3   88.69   22.86
  -5 -15   3   88.34   21.69
  -5  15   2 1413.88  197.23
   5  15  -2 1105.97  110.07
   5  15  -2 1003.16   95.14
  -5  15   2 1035.97   94.83
  -5 -15   2 1051.34  111.36
  -5  15   1  407.73   86.89
  -5  15   1  195.96   42.48
   5  15  -1  179.30   35.08
   5  15  -1  228.02   51.97
   5 -15  -1  141.46   39.23
   5 -15  -1  216.93   37.78
  -5 -15   1  233.50   41.25
  -5  15   0  315.35   89.81
  -5  15   0  186.26   37.21
   5  15   0  284.56   51.71
   5  15   0  285.53   45.58
   5 -15   0  257.94   52.29
   5 -15   0  237.39   35.14
  -5 -15   0  365.28   70.07
  -5 -15   0  324.52   43.65
  -5  15  -1   86.86   56.03
  -5  15  -1   32.24   20.61
   5  15   1   18.83    8.92
   5  15   1   70.26   24.01
   5 -15   1    6.79    9.12
   5 -15   1   35.45   14.77
  -5 -15  -1   15.06   19.17
  -5 -15  -1   36.72   22.79
  -5  15  -2   57.02   39.86
  -5  15  -2   73.96   33.22
   5  15   2    7.94   17.27
   5  15   2   71.40   23.49
   5 -15   2   16.64   16.87
   5 -15   2   19.41   25.18
  -5 -15  -2   65.34   31.90
  -5 -15  -2   32.53   21.61
  -5  15  -3   68.26   69.22
   5  15   3   31.45   21.92
  -5 -15  -3   93.78   32.84
   5 -15   3    1.50   29.59
   5 -15   3    4.09   12.99
  -5  15  -4  157.33   64.09
   5  15   4  181.86   49.82
  -5 -15  -4  201.64   45.89
   5 -15   4  260.29   67.67
  -5  15  -5   72.43   59.06
   5  15   5   52.05   32.97
  -5 -15  -5   50.29   27.45
   5 -15   5  159.91   63.47
   5  15   6   62.96   26.14
  -5 -15  -6   61.83   48.28
   5 -15   6  137.90   67.30
  -5  15  -7  278.65   64.46
   5  15   7  426.97   75.42
  -5 -15  -7  324.29   58.73
   5 -15   7  322.85   75.73
   5  15   8  215.86   63.47
  -5 -15  -8  274.64   77.52
   5 -15   8  275.48   77.64
   5  15   9   27.22   39.53
  -5 -15  -9   27.14   25.36
   5 -15   9  125.48   56.47
   5  15  10   67.81   45.84
  -5 -15 -10  120.53   39.40
   5 -15  10  163.87   57.79
   5 -17 -10  220.28   57.21
   5 -17  -9 3070.83  289.63
   5 -17  -8   93.37   49.46
   5 -17  -7 3249.65  261.06
   5 -17  -6   75.63   40.50
   5  17  -5 3534.66  260.28
   5 -17  -5 3353.60  263.04
   5  17  -4 3806.15  224.49
   5  17  -4 3574.50  202.18
   5 -17  -4 3139.01  187.83
  -5 -17   4 4302.01  262.50
  -5  17   3 3757.69  621.47
   5  17  -3 4569.60  213.03
   5  17  -3 4210.84  205.28
  -5 -17   3 5494.24  280.80
  -5  17   2  727.79  116.42
   5  17  -2  706.28   56.81
   5  17  -2  560.76   35.75
  -5  17   2  527.32   28.24
  -5 -17   2  696.57   60.76
  -5  17   1 7085.24  698.19
  -5  17   1 5832.39  298.72
   5  17  -1 5875.85  306.85
   5  17  -1 6510.90  336.98
   5 -17  -1 6716.88  364.68
   5 -17  -1 6188.15  320.60
  -5 -17   1 6662.29  341.89
  -5  17   0   98.19   36.44
  -5  17   0   41.01   13.85
   5  17   0   29.01   18.07
   5  17   0   44.72   23.60
   5 -17   0    9.44   17.91
   5 -17   0   80.66   21.84
  -5 -17   0   32.43   16.46
  -5  17  -1   38.45   53.70
  -5  17  -1   25.51   14.77
   5  17   1   28.19   23.13
   5  17   1   14.71   14.01
   5 -17   1   25.08   21.63
   5 -17   1   57.33   23.02
  -5 -17  -1    8.09   17.00
  -5  17  -2  204.48   71.60
  -5  17  -2  162.11   35.98
   5  17   2  315.55   70.48
   5 -17   2  287.08   62.45
   5 -17   2  232.63   49.40
  -5 -17  -2  260.49   44.79
  -5  17  -310316.20  599.13
   5  17   310191.62  579.00
  -5 -17  -310954.13  619.98
   5 -17   310444.58  601.03
  -5  17  -4  167.98   49.54
   5  17   4  302.23   53.36
  -5 -17  -4  325.99   62.93
   5 -17   4  259.42   67.72
  -5  17  -5 2810.40  309.00
   5  17   5 2597.80  249.52
   5 -17   5 2166.23  190.92
   5 -17   5 2818.10  245.68
  -5 -17  -5 2596.02  213.33
  -5  17  -6 1460.77  205.40
   5  17   6 1194.34  192.05
   5 -17   6  679.71  139.17
   5 -17   6 1269.89  132.20
  -5 -17  -6 1355.80  123.83
   5  17   7  252.86   83.32
  -5 -17  -7  109.43   47.67
   5 -17   7   90.26   44.43
   5  17   8   67.25   39.94
  -5 -17  -8   21.48   33.32
   5 -17   8  198.08   73.84
   5  17   9  287.61   83.58
  -5 -17  -9  379.22   96.46
   5 -17   9  236.74   72.06
   5 -19 -10  304.68   75.52
   5 -19  -9   -6.25   37.97
   5 -19  -8 1134.60  132.64
   5 -19  -7  144.51   46.77
   5  19  -6  760.29  117.86
   5 -19  -6  926.52   66.61
   5  19  -5  796.11  124.47
   5 -19  -5  861.82  130.90
   5  19  -4 2722.10  201.26
   5  19  -4 3002.71  211.48
   5 -19  -4 3320.44  245.23
  -5 -19   4 3892.49  291.84
   5  19  -3   58.65   26.20
   5  19  -3   63.54   19.54
   5 -19  -3  151.19   41.82
  -5 -19   3   62.44   18.99
  -5  19   2 5111.33  335.31
  -5  19   2 5143.78  235.32
   5  19  -2 5356.76  250.61
   5  19  -2 5570.22  271.00
  -5 -19   2 5584.48  261.01
  -5  19   1  164.55   59.45
  -5  19   1   63.59   21.82
   5  19  -1  125.20   30.15
  -5 -19   1  116.45   25.01
  -5  19   0 2007.39  305.92
  -5  19   0 1474.43  139.25
   5  19   0 1717.55   90.64
   5  19   0 1498.55   88.15
   5 -19   0 1918.34  216.80
   5 -19   0 1655.47  143.81
  -5 -19   0 1734.92  110.34
  -5  19  -1  941.28  193.70
  -5  19  -1  331.14  116.60
   5  19   1  759.39  113.96
   5  19   1  978.25  208.70
   5 -19   1  504.95  128.03
   5 -19   1  900.30  178.24
  -5 -19  -1  781.09  112.92
  -5  19  -2  690.59  103.65
  -5  19  -2  287.99   95.32
   5  19   2  652.48  117.63
   5 -19   2  903.66  140.34
   5 -19   2  515.14  104.50
  -5 -19  -2  604.33   66.76
  -5  19  -3 1413.63  168.72
   5  19   3 1455.10  162.32
  -5 -19  -3 1705.48  308.29
   5 -19   3 1681.90  307.13
   5 -19   3 1166.73  172.72
  -5  19  -4 3901.39  347.25
   5  19   4 4543.99  367.68
  -5 -19  -4 3926.21  316.00
   5 -19   4 4374.10  357.30
  -5  19  -5  296.40   68.48
   5  19   5  430.01  102.12
   5 -19   5  373.75   68.62
   5 -19   5  499.13   82.85
  -5 -19  -5  512.47   82.66
  -5  19  -6 1791.86  323.83
   5  19   6 2301.08  234.66
  -5 -19  -6 2576.72  245.14
   5 -19   6 2392.33  266.12
   5  19   7   36.14   32.38
  -5 -19  -7   36.75   24.99
   5 -19   7   91.63   54.36
  -5 -19  -8 1597.50  123.87
   5 -19   8 1726.62  155.92
   5  19   9   91.82   47.91
  -5 -19  -9  144.99   47.61
   5 -19   9   63.32   68.48
   5 -21  -9  178.66   57.70
   5 -21  -8  927.85  158.50
   5 -21  -7 1032.56   75.79
   5  21  -6 2632.30  256.86
   5 -21  -6 2478.16  236.94
   5  21  -5  950.54  212.05
   5 -21  -5 1066.65   98.90
   5  21  -4  509.14  101.94
   5  21  -4  498.81   71.19
   5 -21  -4  594.56  130.83
  -5 -21   4  206.88   55.22
   5  21  -3 2807.42  209.22
   5  21  -3 2772.23  201.95
   5 -21  -3 2625.14  196.72
  -5 -21   3 2634.02  187.89
  -5  21   2 4944.78  337.74
  -5  21   2 4060.66  284.18
   5  21  -2 4520.68  258.34
  -5  21   2 4096.06  287.97
   5  21  -2 4605.60  330.73
  -5 -21   2 4764.21  271.53
  -5  21   1 1323.85  292.93
   5  21  -1 1663.76  117.43
   5  21  -1 1745.35  107.62
  -5  21   1 1607.66  328.23
  -5 -21   1 1635.41  333.63
  -5  21   0 1958.98  338.63
   5  21   0 1613.40  330.63
  -5  21   0 1313.57  176.91
   5 -21   0 1802.17  130.86
  -5 -21   0 1860.46  114.27
  -5  21  -1  713.60  124.68
   5  21   1  739.57  125.13
  -5 -21  -1  718.01  136.84
   5 -21   1  870.77  142.53
  -5  21  -2  -20.13   49.88
   5  21   2   17.06   19.89
  -5  21  -2   13.06   16.61
   5 -21   2   33.95   18.93
  -5 -21  -2   16.27   21.27
  -5  21  -3  539.65  141.61
   5  21   3  642.80  143.62
  -5 -21  -3  870.63  131.47
   5 -21   3  824.06  133.40
   5 -21   3  502.28  108.43
   5  21   4  952.66  192.57
  -5 -21  -4  899.51  196.84
   5 -21   4  959.00  192.44
   5 -21   4  616.86  118.16
  -5  21  -5 1748.48  179.13
   5  21   5 2214.75  245.67
  -5 -21  -5 1888.51  180.96
   5 -21   5 1835.20  201.94
   5  21   6 1215.31  175.00
  -5 -21  -6 1503.87  112.64
   5 -21   6 1021.77  261.82
  -5  21  -7   50.26   25.64
   5  21   7  248.43   69.12
  -5 -21  -7  261.00   63.93
   5 -21   7  187.67   60.55
   5  21   8   67.02   27.59
  -5 -21  -8   54.14   51.82
   5 -21   8   82.83   50.51
   5  21   9  122.73   57.92
  -5 -21  -9  139.49   50.87
   5 -21   9  188.75   71.93
   5 -23  -9    9.67   36.10
   5 -23  -8   -5.59   33.48
   5  23  -7   63.08   31.21
   5 -23  -7   91.73   40.27
   5  23  -6   23.80   31.44
   5 -23  -6   94.68   47.87
   5  23  -5 1783.60  171.67
   5 -23  -5 1901.68  186.79
   5  23  -4  158.80   52.39
  -5 -23   4   11.95    6.84
   5 -23  -4  108.24   39.68
  -5 -23   4   45.67   15.36
   5  23  -3 1011.45  148.97
  -5 -23   3  967.57  137.87
   5 -23  -3 1070.54  185.59
  -5  23   2  482.00   82.64
   5  23  -2  761.28  112.77
   5  23  -2  801.78  165.37
  -5  23   2  714.89  105.65
  -5 -23   2  887.56  143.74
   5 -23  -2  708.68  107.03
  -5  23   1   -7.98   68.48
   5  23  -1   64.88   33.22
   5  23  -1   31.72   18.22
  -5 -23   1   28.81   17.14
  -5  23   0   69.90   43.13
  -5  23   0   38.88   18.35
   5  23   0    5.03   21.51
  -5 -23   0   34.54   14.78
  -5  23  -1  571.87  118.36
   5  23   1  671.44  147.49
  -5 -23  -1  707.06  108.37
   5 -23   1  717.09  157.64
   5  23   2 3793.95  316.98
  -5 -23  -2 3778.34  301.88
   5 -23   2 4131.67  349.87
  -5  23  -3  164.58   85.22
   5  23   3   62.19   22.56
  -5 -23  -3  107.23   41.44
   5 -23   3   22.69   36.52
  -5  23  -4  447.07  127.46
   5  23   4  398.37   93.11
  -5 -23  -4  556.50   91.50
   5 -23   4  478.95  145.87
  -5  23  -5  146.10   78.06
   5  23   5   97.91   35.22
  -5 -23  -5  176.68   39.88
   5 -23   5   99.86   34.37
   5  23   6   86.67   54.17
  -5 -23  -6  133.22   58.84
   5 -23   6   82.22   51.47
   5  23   7  484.96  100.17
  -5 -23  -7  834.33  121.37
   5 -23   7  549.04  133.32
   5  23   8  154.65   55.94
  -5 -23  -8  349.41   84.01
   5 -23   8  117.92   47.42
   5 -25  -9  111.40   64.79
   5  25  -8    8.67   35.65
   5 -25  -8   71.34   41.53
   5  25  -7   52.18   43.21
   5 -25  -7  103.06   69.88
   5  25  -6  152.44   42.86
   5 -25  -6  260.44   69.72
   5  25  -5  276.67   44.81
   5 -25  -5  366.66   59.13
   5  25  -4 2307.00  217.24
  -5 -25   4 1759.45  160.50
   5 -25  -4 2298.14  300.99
   5  25  -3  421.56   71.64
   5  25  -3  199.63   75.91
   5 -25  -3  550.07   84.06
  -5 -25   3  355.24   61.43
   5  25  -2 1884.81  138.43
  -5  25   2 1423.83   95.99
  -5  25   2 1556.75  126.92
  -5 -25   2 1884.89  130.97
   5 -25  -2 1662.84  127.63
  -5  25   1   24.05   12.97
   5  25  -1  107.38   36.78
   5 -25  -1   43.64   20.61
  -5 -25   1   47.00   21.31
  -5  25   0  279.04   97.22
  -5  25   0   23.81   20.54
   5  25   0  194.58   52.25
  -5 -25   0   97.08   33.16
  -5  25  -1  115.69   63.07
   5  25   1   26.47   22.38
  -5 -25  -1   33.51   26.50
   5 -25   1    9.34   17.67
  -5  25  -2 1503.51  353.80
   5  25   2 1431.53  152.58
  -5 -25  -2 1504.48  126.75
  -5  25  -3  223.84   70.75
   5  25   3   85.06   26.52
  -5 -25  -3  166.21   33.65
   5 -25   3  202.76   57.76
  -5  25  -4  315.93   75.69
   5  25   4  359.96   51.53
  -5 -25  -4  433.20   45.70
   5 -25   4  268.73   74.53
   5  25   5  400.21   85.42
  -5 -25  -5  377.60   62.01
   5 -25   5  462.97   88.86
   5  25   6  549.82  139.78
  -5 -25  -6  590.67  165.57
   5 -25   6  629.73  142.90
   5  25   7  277.87  119.57
  -5 -25  -7  413.62   97.53
   5 -25   7  353.51  114.24
   5  25   8  749.63  216.59
  -5 -25  -8  833.58  149.27
   5 -25   8  488.81  207.31
   5  27  -8 1669.90  329.45
   5 -27  -8 2114.80  354.56
   5  27  -7  809.30  154.03
   5 -27  -7  959.05  135.24
   5  27  -6  997.18  225.79
   5 -27  -6 1319.13  145.86
   5  27  -5 1798.15  272.65
   5 -27  -5 1813.26  194.31
   5  27  -4  381.61   59.40
   5 -27  -4  368.93  104.75
   5  27  -3  747.98   73.09
  -5 -27   3  445.28   53.32
   5 -27  -3  932.54  153.12
  -5  27   2 1143.66   93.60
   5  27  -2 1459.07  209.86
   5 -27  -2 1387.61  174.10
  -5 -27   2 1091.28  144.25
   5  27  -1 1175.27  104.18
  -5 -27   1 1216.57  101.56
   5 -27  -1 1210.28  200.06
   5  27   0  400.58   96.67
  -5  27   0   47.86   40.69
   5 -27   0  734.35  143.59
  -5 -27   0  480.46   88.49
   5  27   1 1012.56  169.61
  -5 -27  -1 1154.36  100.85
  -5  27  -2  830.58  232.53
   5  27   2  877.42  164.24
  -5 -27  -2  878.56   86.15
   5 -27   2  737.59  179.81
  -5  27  -3  328.44  117.27
   5  27   3  211.13   44.04
  -5 -27  -3  336.47   97.71
   5 -27   3  296.17   66.42
   5  27   4  399.11   84.92
  -5 -27  -4  429.03   61.83
   5 -27   4  426.85  113.99
  -5  27  -5  352.94  107.10
   5  27   5  611.75  159.79
  -5 -27  -5  758.00  128.34
   5 -27   5  747.98  165.38
   5  27   6  258.72   64.31
  -5 -27  -6  144.89   65.76
   5 -27   6  140.58   53.46
   5  27   7  754.88  150.70
  -5 -27  -7 1364.98  242.28
   5 -27   7  802.75  357.19
   5  29  -7  101.42   56.19
   5 -29  -7  135.38   54.76
   5  29  -6  467.28  123.89
   5 -29  -6  498.69  121.59
   5  29  -5  301.65  103.54
   5 -29  -5  441.03   68.16
   5  29  -4 1434.92  258.03
   5 -29  -4 1577.56  233.91
   5  29  -3  381.83   54.42
   5 -29  -3  281.05   67.61
   5  29  -2  -13.16   24.51
  -5 -29   2   17.22   13.54
   5 -29  -2   71.91   25.65
  -5  29   1 1342.55   82.92
   5  29  -1 1553.04  109.38
   5 -29  -1 1424.45  102.35
  -5 -29   1 1543.12   99.43
   5  29   0   49.87   22.15
  -5 -29   0   85.19   31.07
   5  29   1  195.94   44.97
  -5 -29  -1  184.38   36.44
   5 -29   1  157.83   44.34
   5  29   2  208.38   42.76
  -5 -29  -2  138.68   39.31
   5 -29   2   76.10   25.17
   5  29   3  128.31   37.83
  -5 -29  -3  246.64   47.01
   5 -29   3   61.61   26.90
   5  29   4   32.59   27.76
  -5 -29  -4   -9.49   25.67
   5 -29   4   53.98   51.27
   5  29   5   23.94   33.75
  -5 -29  -5   64.42   34.43
   5 -29   5   25.50   29.54
   5  29   6  595.64  151.66
  -5 -29  -6  857.03  164.19
   5 -29   6  341.86  135.75
   5  31  -7  329.17  113.27
   5 -31  -7  216.51  100.10
   5  31  -6  531.85  131.82
   5 -31  -6  562.71  117.51
   5  31  -5   90.55   22.18
   5 -31  -5   66.97   56.25
   5  31  -4   77.36   30.82
   5 -31  -4   25.67   22.21
   5  31  -3   73.71   31.90
   5 -31  -3   38.89   33.61
   5  31  -2   94.64   35.05
  -5 -31   2  192.97   59.19
   5 -31  -2  169.40   68.37
   5  31  -1  359.94  109.36
  -5 -31   1  304.65   96.16
   5 -31  -1  414.37   86.72
  -5  31   0  179.87   26.50
   5  31   0  175.08   38.86
   5 -31   0  209.30   78.69
  -5 -31   0  323.82   36.17
   5  31   1   17.74   16.17
  -5 -31  -1   21.28   24.01
   5 -31   1   71.12   29.38
   5  31   2  296.88   78.07
  -5 -31  -2  484.90   81.58
   5 -31   2  443.86   65.54
   5  31   3  101.75   40.78
  -5 -31  -3   81.34   39.07
   5 -31   3   50.56   23.22
   5  31   4 1052.52  212.97
  -5 -31  -4 1622.74  147.05
   5 -31   4 1113.86  373.26
   5  31   5   94.62   48.56
  -5 -31  -5   78.56   32.07
   5 -31   5  153.38   51.99
   5  31   6  762.72  147.83
   5 -31   6  393.89  120.07
   5  33  -6 1352.31  230.04
   5 -33  -6  664.02  318.71
   5  33  -5  338.38  108.88
   5 -33  -5  475.93   97.03
   5 -33  -4 1187.80  141.06
   5 -33  -3  220.79   63.08
   5  33  -1 2979.66  202.34
  -5 -33   1 3071.29  202.16
   5 -33  -1 2749.95  194.01
   5  33   0 2858.90  193.61
  -5 -33   0 3181.34  211.32
   5 -33   0 3195.23  217.90
   5  33   1   40.52   33.78
  -5 -33  -1   43.46   33.85
   5 -33   1   69.54   38.56
   5  33   2  748.58  118.79
  -5 -33  -2  772.33  109.85
   5  33   3  531.98  150.89
  -5 -33  -3  532.87  183.84
   5  33   4   -7.18   24.24
  -5 -33  -4   13.59   31.85
   5  33   5 1996.72  338.10
  -5 -33  -5 1750.55  297.47
   5 -35  -4  288.13   91.53
   5  35  -3  525.99  135.88
   5 -35  -3  468.77  124.93
   5  35  -2 1533.12  263.82
   5 -35  -2 1544.74  266.02
   5  35  -1   84.28   37.49
   5 -35  -1  154.61   53.23
   5  35   0  284.45   69.36
  -5 -35   0  412.53   94.28
   5 -35   0  497.05  108.56
   5  35   2  527.53  158.52
  -5 -35  -2  824.58  148.10
   5  35   3   22.31   19.28
  -5 -35  -3   31.90   41.53
   5  37  -2  103.41   33.20
   5  37  -1    2.82   22.21
   5 -37  -1   50.69   37.53
   5  37   0   19.86   30.41
   5  37   1    7.75   28.49
  -5 -37  -1  132.50   55.43
   6   0 -11   18.62   15.97
   6   0 -1010076.58  124.00
   6   0  -9   19.64   20.90
   6   0  -8  810.83  128.82
   6   0  -7   -4.12   20.14
   6   0  -7   -3.94   19.74
  -6   0   6  859.36  215.66
   6   0  -6 1103.16  160.05
   6   0  -6 1098.45  162.40
  -6   0   5   81.08   42.11
   6   0  -5   38.22   15.64
   6   0  -5   -1.48   11.90
  -6   0   435471.36 3228.40
   6   0  -425467.86 2314.50
   6   0  -429601.22 2687.50
   6   0  -431070.20 2817.37
  -6   0   3   69.95   42.33
   6   0  -3   27.51   17.27
   6   0  -3   12.45   14.38
  -6   0   2 1875.36  124.17
   6   0  -2 1634.07   88.79
   6   0  -2 1179.78   75.75
  -6   0   2 1472.49   51.55
  -6   0   1   45.58   20.23
   6   0  -1    7.02   12.51
   6   0  -1   16.46   15.31
  -6   0   1    3.86   12.12
  -6   0   0 2551.10   83.21
   6   0   0 2696.93   69.09
   6   0   0 2326.61   67.90
  -6   0   0 2083.22  140.81
  -6   0  -1   29.22   27.45
   6   0   1   -0.46   14.22
   6   0   1   35.69   25.96
  -6   0  -1   29.80   30.16
  -6   0  -2 8613.39  258.17
   6   0   2 9033.01  268.33
   6   0   2 9600.97  295.77
  -6   0  -2 7775.36  233.94
  -6   0  -3    4.05   17.67
   6   0   3   37.66   14.73
   6   0   3   83.59   46.55
  -6   0  -3   92.11   33.31
  -6   0  -4 2530.02  147.63
   6   0   4 2388.12  130.89
   6   0   4 2751.28  182.49
  -6   0  -5   35.79   13.23
   6   0   5   78.93   49.94
  -6   0  -6 6139.56  438.20
   6   0   6 5753.20  436.85
  -6   0  -7   24.69   22.82
   6   0   7   48.00   44.07
  -6   0  -8 5162.55  310.31
   6   0   8 4975.61  310.86
  -6   0  -9   34.57   35.29
   6   0   9  109.09   85.26
  -6   0 -10  661.89  210.68
   6   0  10  824.23  130.23
   6   2 -10  173.80   49.41
   6  -2 -10  219.61   59.62
   6  -2  -9 2400.09  154.91
   6   2  -8   66.72   20.60
   6  -2  -8  115.78   42.28
   6   2  -7  129.59   41.01
   6   2  -7   99.37   28.12
   6  -2  -7   86.42   25.44
   6  -2  -7  105.13   39.33
   6   2  -6   28.52   27.76
  -6   2   6  137.20   60.49
   6   2  -6   75.39   28.66
   6  -2  -6   -3.29   33.31
   6  -2  -6   28.75   12.90
   6  -2  -6   21.03   12.01
  -6  -2   6   12.66   35.18
  -6   2   5 1012.95  132.11
   6   2  -5  820.62   49.73
   6   2  -5  542.02  117.12
  -6  -2   5  976.60  156.55
   6  -2  -5  787.04   54.29
   6  -2  -5 1047.24  174.26
   6  -2  -5  727.86   43.28
  -6   2   4 6124.92  244.82
   6   2  -4 5514.49  180.45
   6   2  -4 5115.67  182.78
   6  -2  -4 5880.12  194.11
  -6  -2   4 4952.25  187.06
  -6   2   3 6203.84  222.59
   6   2  -3 7722.51  235.93
   6   2  -3 6875.01  206.59
  -6  -2   3 6929.96  230.03
   6  -2  -3 5962.14  188.42
   6  -2  -3 7310.33  213.84
  -6   2   2   52.07   43.20
   6   2  -2  130.24   23.59
   6   2  -2   68.70   15.76
  -6   2   2   65.78   18.60
  -6  -2   2   72.22   28.48
   6  -2  -2   74.36   21.01
  -6  -2   2   34.55   14.01
   6  -2  -2   71.56   19.20
   6   2  -1 1030.37   93.10
   6   2  -1 1053.89   84.83
  -6   2   1  984.05  109.04
  -6   2   1  902.60   62.54
  -6  -2   1 1178.19  126.22
   6  -2  -1  861.28   63.73
   6  -2  -1 1081.79   78.71
  -6  -2   1  992.54   69.50
   6   2   0  462.57   38.07
  -6   2   0  557.10   86.53
  -6   2   0  517.41   50.62
   6   2   0  450.49   42.45
   6  -2   0  666.15  110.18
   6  -2   0  390.80   80.32
  -6  -2   0  475.19   47.12
  -6  -2   0  491.76   42.47
  -6   2  -1 6776.45  223.32
   6   2   1 7013.75  221.87
   6   2   1 6379.97  193.85
  -6   2  -1 5678.16  175.10
  -6  -2  -1 5507.42  171.24
   6  -2   1 6004.31  190.88
  -6  -2  -1 6662.69  203.92
   6  -2   1 6166.43  187.54
  -6   2  -2  733.57  118.15
   6   2   2  468.70   83.52
   6   2   2  392.18   41.06
  -6   2  -2  365.57   61.73
  -6  -2  -2  504.04  106.42
   6  -2   2  408.29   59.13
  -6  -2  -2  408.32   52.36
   6  -2   2  323.18   37.52
   6   2   3  426.51   70.26
  -6   2  -3  347.17   51.83
   6   2   3  292.69   29.74
  -6   2  -3  260.27   32.11
  -6  -2  -3  383.81   75.86
   6  -2   3  340.82   57.00
   6  -2   3  366.15   35.25
  -6  -2  -3  319.23   31.18
  -6   2  -4  127.53   22.08
   6   2   4   93.81   31.77
  -6  -2  -4  108.18   30.92
   6  -2   4   61.80   34.46
  -6   2  -5 2113.86  131.41
   6   2   5 1984.98  140.87
  -6  -2  -5 2147.76  135.40
   6  -2   5 2214.96  207.84
  -6   2  -6   93.74   35.37
   6   2   6   31.07   32.25
  -6  -2  -6    6.31   29.59
   6  -2   6   72.46   27.58
  -6   2  -7 1913.30  153.30
   6   2   7 2171.26  245.04
  -6  -2  -7 2011.30  149.06
   6  -2   7 2189.71  177.43
   6   2   8  264.85   59.74
  -6  -2  -8  127.45   34.24
   6  -2   8  256.71   72.79
  -6   2  -9   56.59   34.52
   6   2   9  136.97   83.24
  -6  -2  -9  291.64   65.81
   6  -2   9   25.14   27.10
  -6   2 -10   85.42   56.83
   6   2  10  215.50   74.82
  -6  -2 -10  174.15   35.76
   6  -2  10  120.10   98.00
   6  -4 -11  187.75   70.51
   6  -4 -10   68.34   35.09
   6   4  -9   46.04   21.20
   6  -4  -9   27.86   16.81
   6   4  -8  118.56   34.44
   6  -4  -8   80.56   32.82
   6  -4  -8   46.76   21.26
   6   4  -7   36.89   19.00
   6   4  -7   19.64   24.20
   6  -4  -7   52.25   19.34
   6  -4  -7   93.58   39.32
   6   4  -6   10.56   13.85
   6   4  -6   35.53   22.40
   6   4  -6   34.99   19.42
   6  -4  -6   42.46   49.11
  -6  -4   6  -19.09   39.18
   6  -4  -6   14.12   13.49
   6  -4  -6   74.85   23.89
  -6   4   5  240.51   71.54
   6   4  -5  181.61   41.97
   6   4  -5  120.88   32.56
   6   4  -5  216.18   32.96
  -6  -4   5  274.89   62.71
   6  -4  -5  193.19   40.00
   6  -4  -5  284.89   48.83
  -6   4   4  146.61   51.08
   6   4  -4   34.21   16.64
   6   4  -4   28.60   13.25
   6   4  -4   38.60   17.45
   6  -4  -4  121.80   56.76
  -6  -4   4   26.45   31.36
   6  -4  -4   15.71   10.35
   6  -4  -4   17.53   12.47
  -6   4   3  431.31   66.37
   6   4  -3  548.38   94.79
   6   4  -3  452.83   48.76
  -6  -4   3  372.88   53.16
   6  -4  -3  344.05   66.96
   6  -4  -3  429.32   36.52
  -6   4   2  818.88  120.46
   6   4  -2  664.71   65.21
   6   4  -2  746.40  111.74
  -6   4   2  649.63   58.24
   6  -4  -2  455.68   97.64
   6  -4  -2  591.37   54.33
  -6  -4   2  677.68  118.89
  -6  -4   2  655.22   60.79
  -6   4   1  225.97   53.06
   6   4  -1  143.80   32.85
   6   4  -1  135.22   21.45
  -6   4   1  109.90   16.35
  -6  -4   1  221.60   46.81
   6  -4  -1  155.81   28.55
   6  -4  -1  151.27   30.04
  -6  -4   1  150.72   33.77
   6   4   0 1792.65   66.20
  -6   4   0 1747.15  201.47
  -6   4   0 1653.41   70.20
   6   4   0 1754.32   82.89
   6  -4   0 1597.53   65.37
  -6  -4   0 1623.62   67.77
   6  -4   0 1980.67   81.71
  -6  -4   0 1767.28   70.02
  -6   4  -1 5726.95  186.10
  -6   4  -1 4824.65  148.95
   6   4   1 5259.17  161.87
   6   4   1 4856.95  155.49
   6  -4   1 5167.55  160.33
   6  -4   1 5396.56  179.86
  -6  -4  -1 5215.22  175.21
  -6  -4  -1 4944.58  152.97
  -6   4  -2 1425.47   74.43
  -6   4  -2 1244.39  132.10
   6   4   2 1186.86  126.19
   6   4   2 1680.89  194.65
  -6  -4  -2 1064.70   76.25
   6  -4   2 1456.79   80.23
   6  -4   2 1113.57   74.89
  -6  -4  -2 1414.60   63.68
  -6   4  -3 1161.92  129.26
   6   4   3  730.42   76.51
   6   4   3  882.48  124.57
  -6   4  -3  745.57  145.70
  -6  -4  -3  788.34   81.82
   6  -4   3  786.62   93.73
   6  -4   3  849.10  125.45
  -6  -4  -3  747.35   84.03
  -6   4  -4  953.64   67.34
   6   4   4  896.79   66.65
  -6  -4  -4 1233.19   89.75
   6  -4   4 1007.35   87.62
  -6   4  -5   37.99   20.21
   6   4   5   86.14   49.74
  -6  -4  -5  -12.97   23.37
   6  -4   5   17.39   44.50
  -6   4  -6  697.85  127.45
   6   4   6  779.21  149.06
  -6  -4  -6  861.02  107.91
   6  -4   6  795.63  106.75
  -6   4  -7 1858.29  151.06
   6   4   7 2167.20  271.36
  -6  -4  -7 2269.99  192.64
   6  -4   7 1996.32  363.00
  -6   4  -8   23.77   15.64
   6   4   8   69.68   43.33
  -6  -4  -8  104.54   20.31
   6  -4   8  155.05   82.01
   6   4   9  130.54   69.17
  -6  -4  -9  110.68   51.22
   6  -4   9  123.28   87.79
  -6   4 -10  209.14   56.39
   6   4  10  465.74  122.23
  -6  -4 -10  439.29  109.13
   6  -4  10  664.75  150.48
   6  -6 -11   35.88   19.05
   6   6 -10  104.21   31.58
   6  -6 -10  154.39   51.35
   6   6  -9   72.65   30.33
   6  -6  -9   37.93   33.09
   6   6  -8 2999.73  232.09
   6  -6  -8 3493.39  278.37
   6   6  -7  744.73  125.72
   6   6  -7 1252.90  178.70
   6  -6  -7 1273.78  212.42
   6  -6  -7  767.65  158.50
   6  -6  -7 1222.32  172.82
   6   6  -6 3198.47  188.16
   6   6  -6 3121.47  189.11
  -6  -6   6 2592.73  175.46
   6  -6  -6 3015.62  181.47
   6  -6  -6 3128.32  183.81
   6  -6  -6 3005.56  171.25
  -6   6   5   81.43   42.55
   6   6  -5   44.32   22.99
   6   6  -5   -9.98   12.42
   6   6  -5   44.39   15.82
   6  -6  -5    4.23   21.88
   6  -6  -5   23.33   10.39
   6  -6  -5   39.72   14.52
  -6  -6   5   40.54   25.37
  -6   6   4  601.27  131.63
   6   6  -4  514.58   92.10
   6   6  -4  708.20  124.20
   6   6  -4  516.54   59.83
   6  -6  -4  461.92   70.69
   6  -6  -4  556.43   56.86
  -6  -6   4  566.29  105.85
  -6   6   3  121.23   56.44
   6   6  -3  115.08   19.52
   6   6  -3   98.85   17.34
   6  -6  -3  129.85   49.89
   6  -6  -3  117.64   20.75
  -6  -6   3   93.10   31.21
  -6   6   229412.04  863.36
   6   6  -231780.14  903.58
   6   6  -232464.55 1927.94
  -6   6   234065.67 2020.53
  -6  -6   230450.66  870.56
   6  -6  -237219.50 2209.25
   6  -6  -227161.46  782.42
  -6  -6   232307.56 1919.32
  -6   6   1  212.85   57.95
   6   6  -1  246.32   40.17
  -6   6   1  256.15   45.53
   6   6  -1  193.66   26.28
  -6  -6   1  246.12   44.82
   6  -6  -1  187.77   34.99
  -6  -6   1  251.51   61.69
   6  -6  -1  222.03   30.52
  -6   6   0 6495.66  229.39
   6   6   0 6100.97  189.26
   6   6   0 5618.23  170.59
  -6   6   0 5693.61  172.93
   6  -6   0 6643.76  207.90
   6  -6   0 5391.70  167.40
  -6  -6   0 5597.40  174.48
  -6  -6   0 5864.46  177.46
  -6   6  -1  488.39   72.24
  -6   6  -1  484.73   97.33
   6   6   1  566.88   93.19
   6   6   1  454.96   48.64
   6  -6   1  466.17   74.92
   6  -6   1  601.60  113.17
  -6  -6  -1  579.12   70.39
  -6  -6  -1  506.98   49.12
  -6   6  -2 3940.77  147.77
   6   6   2 3212.78  125.59
   6   6   2 3870.45  134.38
  -6   6  -2 4123.80  149.94
   6  -6   2 3820.42  133.35
   6  -6   2 4212.21  163.08
  -6  -6  -2 4176.75  146.88
  -6   6  -3 2279.25   96.79
   6   6   3 1855.20   89.53
   6   6   3 1798.76   74.68
   6  -6   3 1735.36  118.21
  -6  -6  -3 2214.83   89.33
  -6  -6  -3 1991.48   85.32
  -6   6  -421854.77 3017.99
   6   6   415989.07  824.90
   6  -6   417092.49  865.33
   6  -6   417833.68  913.84
  -6  -6  -418642.10 2574.16
  -6   6  -5 1539.73  216.30
   6   6   5 1361.84  179.76
  -6  -6  -5 1586.57  162.54
   6  -6   5 1746.70  133.09
  -6   6  -6 4807.48  381.21
   6   6   6 5455.70  441.16
  -6  -6  -6 5222.53  415.34
   6  -6   6 4881.91  415.14
  -6   6  -7  421.06  119.77
   6   6   7  561.43  137.52
  -6  -6  -7  486.52   72.48
   6  -6   7  505.05  105.32
  -6   6  -8 2219.72  141.16
   6   6   8 2304.74  344.56
  -6  -6  -8 2297.51  147.30
   6  -6   8 2330.79  170.42
  -6   6  -9   18.71   20.74
   6   6   9   33.71   63.76
  -6  -6  -9  -12.33   25.13
   6  -6   9  -27.83   63.00
  -6   6 -10 2180.66  366.83
   6   6  10 1798.02  422.28
  -6  -6 -10 1923.11  363.71
   6  -6  10 2232.74  478.66
   6  -8 -11  299.50   87.32
   6  -8 -10  132.20   57.23
   6  -8  -9  110.52   42.65
   6   8  -8  665.81   91.51
   6  -8  -8  742.23  128.94
   6  -8  -8  653.47   86.97
   6   8  -7 3296.27  260.65
   6  -8  -7 3363.27  281.34
   6  -8  -7 3047.32  242.85
   6  -8  -7 3060.51  239.76
   6   8  -6 2057.15  124.13
   6   8  -6 1814.74  123.66
  -6  -8   6 1637.83  372.05
   6  -8  -6 1970.75  245.03
   6  -8  -6 1569.73  153.82
  -6   8   5  847.32  223.05
   6   8  -5  839.06  124.13
   6   8  -5 1089.73  204.97
  -6  -8   5 1282.35  276.19
   6  -8  -5  932.63  139.41
   6  -8  -5  986.77  137.42
  -6   8   4  167.65   50.00
   6   8  -4   17.45   17.43
   6   8  -4   18.94    7.90
   6   8  -4   40.28   24.44
  -6  -8   4   51.94   28.88
   6  -8  -4   16.28    5.31
   6  -8  -4   18.72    7.38
   6  -8  -4   76.84   29.07
  -6   8   3   82.39   53.45
   6   8  -3  142.27   41.17
   6   8  -3   22.20   13.30
   6  -8  -3   60.66   34.56
   6  -8  -3   18.26   10.43
  -6  -8   3   51.82   21.91
  -6   8   2  279.73   47.63
  -6   8   2  530.85   40.80
   6   8  -2  533.50   39.51
   6   8  -2  622.84  100.45
  -6  -8   2  633.20  101.69
   6  -8  -2  518.66   78.18
   6  -8  -2  440.94   98.71
  -6  -8   2  473.57   38.98
  -6   8   1 9766.90  317.70
  -6   8   110743.71  310.92
   6   8  -110267.36  300.32
   6   8  -1 9801.95  289.05
   6  -8  -1 9179.85  279.69
   6  -8  -1 9491.11  278.09
  -6  -8   1 9428.38  278.57
  -6  -8   110147.70  297.45
  -6   8   0  543.74   84.35
  -6   8   0  306.88   37.09
   6   8   0  328.76   36.91
   6   8   0  292.96   39.03
   6  -8   0  401.23   74.27
   6  -8   0  267.45   56.63
  -6  -8   0  366.37   82.83
  -6  -8   0  355.63   46.63
  -6   8  -1   23.05   26.06
  -6   8  -1   -4.01   10.76
   6   8   1   87.01   26.22
   6   8   1   30.56   16.29
   6  -8   1   15.98   11.95
   6  -8   1   32.41   22.67
  -6  -8  -1   21.14   20.37
  -6   8  -2  181.40   37.09
  -6   8  -2  167.86   38.71
   6   8   2  154.79   18.82
   6   8   2  237.33   46.62
   6  -8   2  189.62   23.76
   6  -8   2  253.69   52.55
  -6  -8  -2  234.87   29.23
  -6  -8  -2  187.06   43.05
  -6   8  -3  121.86   37.67
   6   8   3   82.43   32.46
  -6   8  -3  112.84   20.12
   6  -8   3  157.82   38.98
  -6  -8  -3  123.66   35.11
   6  -8   3   12.12   13.66
  -6   8  -4  305.21   54.76
   6   8   4  263.52   58.87
  -6  -8  -4  309.42   75.92
   6  -8   4  508.56   93.19
   6  -8   4  255.65   53.58
  -6   8  -5 1289.13  136.05
   6   8   5 1169.27  211.83
  -6  -8  -5 1341.49  197.26
   6  -8   5  965.59  157.11
  -6   8  -6   57.31   27.21
   6   8   6   55.95   24.22
  -6  -8  -6   16.84   26.36
   6  -8   6   87.24   49.67
  -6   8  -7  370.02  114.44
   6   8   7  655.79  154.10
  -6  -8  -7  499.96   98.22
   6  -8   7  516.16   99.45
  -6   8  -8   45.52   24.81
   6   8   8  134.76   64.98
  -6  -8  -8  102.50   34.66
   6   8   9 1531.22  135.87
  -6  -8  -9 1344.02  174.85
   6  -8   9 1285.01  152.16
   6   8  10   40.34   64.65
  -6  -8 -10   36.23   24.21
   6 -10 -10   75.52   37.65
   6 -10  -9   41.15   28.69
   6  10  -8 2401.82  218.88
   6 -10  -8 2261.79  215.01
   6 -10  -8 2040.92  185.36
   6  10  -7  320.80   59.16
   6 -10  -7  520.45   93.51
   6 -10  -7  434.34   61.81
   6  10  -6 4333.17  305.60
   6  10  -6 4387.08  319.77
  -6 -10   6 4002.05  323.08
   6 -10  -6 4646.39  326.84
   6 -10  -6 4621.85  323.19
   6 -10  -6 4538.30  327.89
  -6  10   5  232.37   80.11
   6  10  -5  169.28   32.84
   6  10  -5  123.12   32.53
  -6 -10   5  137.93   37.99
   6 -10  -5   40.60   11.06
   6 -10  -5   56.60   11.38
  -6  10   4  462.85  101.71
   6  10  -4  619.40   38.13
   6  10  -4  629.59  101.11
  -6 -10   4  853.70   92.18
  -6  10   3  916.46  162.62
   6  10  -3  620.18  101.23
   6  10  -3  779.42  103.83
   6 -10  -3  457.36   67.99
   6 -10  -3  652.26   67.38
  -6 -10   3  483.27   70.12
  -6  10   2 3873.76  189.64
   6  10  -2 3223.09  118.31
   6  10  -2 3391.36  115.45
  -6  10   2 3267.27  105.49
   6 -10  -2 4057.73  172.12
   6 -10  -2 3219.12  108.36
  -6 -10   2 3711.79  132.61
  -6  10   1 5636.02  217.94
  -6  10   1 6510.15  208.19
   6  10  -1 6697.55  218.27
   6  10  -1 6354.97  210.65
   6 -10  -1 5520.11  191.30
   6 -10  -1 6836.08  223.55
  -6 -10   1 6178.14  203.47
  -6 -10   1 6376.42  209.12
  -6  10   011134.52  384.72
  -6  10   012857.65  409.51
   6  10   011420.82  364.21
   6  10   012152.45  390.24
   6 -10   0 9612.27  312.59
  -6 -10   011163.90  357.79
  -6  10  -1  353.60   56.20
  -6  10  -1  327.63   35.65
   6  10   1  263.89   31.41
   6  10   1  304.43   53.35
   6 -10   1  375.44   45.15
   6 -10   1  363.85   54.94
  -6 -10  -1  301.51   31.68
  -6 -10  -1  228.60   24.85
  -6  10  -2   64.77   29.48
  -6  10  -2   74.39   27.97
   6  10   2  160.75   27.12
   6  10   2  188.06   39.68
   6 -10   2  189.57   38.26
   6 -10   2  111.28   41.58
  -6 -10  -2  253.16   48.71
  -6 -10  -2  132.67   36.44
  -6  10  -3  322.23   56.88
   6  10   3  436.13   54.56
  -6  10  -3  221.72   64.43
   6 -10   3  547.53   89.60
   6 -10   3  328.81   29.50
  -6 -10  -3  327.26   28.91
  -6  10  -4 2270.20  144.26
   6  10   4 2159.88  120.92
   6 -10   4 1923.57  109.12
   6 -10   4 2668.57  224.80
  -6 -10  -4 2192.24  153.08
  -6  10  -5 4624.58  396.11
   6  10   5 4333.76  317.83
  -6 -10  -5 4494.26  325.24
   6 -10   5 3922.62  296.17
  -6  10  -6  111.67   40.59
   6  10   6  144.67   53.89
  -6 -10  -6   50.58   26.04
   6 -10   6  116.88   82.62
  -6  10  -7   39.44   21.65
   6  10   7  138.58   60.02
  -6 -10  -7   39.21   15.20
   6 -10   7   35.48   48.97
   6  10   8  355.04   71.91
  -6 -10  -8  305.87   89.04
   6 -10   8  260.11   63.26
   6  10   9 1079.22  235.21
  -6 -10  -9 1015.46  220.65
   6 -10   9  836.14  258.35
   6  10  10 1250.44  229.58
  -6 -10 -10 1054.74  275.18
   6 -10  10 1267.47  366.56
   6 -12 -11  310.78  116.43
   6 -12 -10  323.18  123.82
   6 -12  -9  674.30   79.25
   6 -12  -8  200.30   44.00
   6  12  -7 1950.00  131.44
   6  12  -7 1763.81  119.71
   6 -12  -7 1818.10  145.36
   6 -12  -7 1068.04   71.22
   6  12  -6 1491.66  178.92
   6 -12  -6 1773.14  321.94
   6  12  -5 2060.61  127.77
  -6  12   5 2348.28  235.45
   6  12  -5 2256.10  135.60
  -6 -12   5 2363.48  150.36
  -6  12   4 2604.75  459.64
   6  12  -4 2603.81  124.38
   6  12  -4 2596.47  135.16
  -6 -12   4 3256.68  243.41
  -6  12   3 1839.14  248.58
   6  12  -3 1709.61   92.51
   6  12  -3 2063.13  204.75
  -6 -12   3 1479.27   95.15
  -6  12   2   60.47   64.56
   6  12  -2  134.63   24.28
   6  12  -2   86.11   15.90
  -6  12   2  145.99   19.74
   6 -12  -2  128.05   39.99
   6 -12  -2   94.98   23.24
  -6 -12   2  141.75   33.11
  -6  12   1 1115.92  127.97
  -6  12   1 1207.11  112.80
   6  12  -1 1398.91   88.59
   6  12  -1 1255.82  122.30
   6 -12  -1 1106.49  111.98
   6 -12  -1 1430.06   60.45
  -6 -12   1 1363.07   88.14
  -6 -12   1 1272.96  120.89
  -6  12   0 2168.60  209.65
  -6  12   0 2242.80   85.72
   6  12   0 1963.25   74.67
   6  12   0 2250.12  125.37
   6 -12   0 1913.53   84.08
   6 -12   0 1991.67   93.84
  -6 -12   0 2188.63   84.34
  -6 -12   0 1971.65   75.31
  -6  12  -1  886.23  109.75
  -6  12  -1  771.64  129.90
   6  12   1  750.02  121.88
   6  12   1  870.81   90.86
   6 -12   1 1082.31  124.71
   6 -12   1  745.54   80.91
  -6 -12  -1  895.88   89.16
  -6 -12  -1  862.54   96.62
  -6  12  -2 3235.86  194.26
  -6  12  -2 2440.56  137.62
   6  12   2 2574.97  145.54
   6 -12   2 2965.32  168.49
   6 -12   2 2603.65  191.68
  -6 -12  -2 2942.48  159.69
  -6  12  -3 1065.31  199.44
   6  12   3 1490.83  109.18
  -6  12  -3  737.43  178.58
   6 -12   3 1070.99  159.87
   6 -12   3 1170.85  210.03
  -6 -12  -3 1174.57  209.88
  -6  12  -4  385.32   77.20
   6  12   4  478.84   68.57
  -6 -12  -4  459.78   62.52
   6 -12   4  213.29   59.88
   6 -12   4  317.54   78.81
  -6  12  -5   79.16   43.79
   6  12   5   65.28   36.03
  -6 -12  -5   60.55   29.13
  -6  12  -6  264.40   83.44
   6  12   6  313.35   58.91
  -6 -12  -6  336.37   69.04
   6 -12   6  489.60   88.37
  -6  12  -7  138.29   38.31
   6  12   7  209.43   56.73
  -6 -12  -7  165.79   47.09
   6 -12   7  261.71   73.16
  -6  12  -8  409.63  127.27
   6  12   8  658.54  119.64
  -6 -12  -8  426.54   92.36
   6 -12   8  472.28   98.25
   6  12   9   65.59   55.89
  -6 -12  -9   92.10   32.88
   6 -12   9  254.77   90.31
   6  12  10  -23.96   45.63
   6 -12  10   85.91   56.34
   6 -14 -11  422.27  140.03
   6 -14 -10   77.85   54.80
   6 -14  -9 1859.99  182.28
   6 -14  -8 1577.07  115.34
   6  14  -7  109.62   23.46
   6  14  -7  283.77   52.95
   6 -14  -7  114.36   34.83
   6  14  -6  559.21   79.55
   6  14  -6  549.45   87.64
   6  14  -6  593.41  111.95
   6 -14  -6  711.82  141.97
   6  14  -5 2487.51  185.51
   6  14  -5 2500.02  177.18
   6 -14  -5 2433.62  182.78
  -6 -14   5 2508.32  187.56
  -6  14   4  332.11   92.75
   6  14  -4  300.86   44.81
   6  14  -4  340.82   61.88
  -6 -14   4  322.73   53.96
  -6  14   3 1435.41  183.88
   6  14  -3  903.20   55.12
   6  14  -3 1099.96  122.09
  -6 -14   3  994.98  103.75
  -6  14   2  654.66   90.91
   6  14  -2  552.02   68.48
   6  14  -2  429.19   66.81
  -6  14   2  445.93   33.56
   6 -14  -2  432.47   47.03
  -6 -14   2  506.24   68.73
  -6  14   1 3787.35  199.88
  -6  14   1 3214.91  107.62
   6  14  -1 3621.84  126.50
   6  14  -1 3391.29  123.35
   6 -14  -1 3440.65  120.98
  -6 -14   1 4025.02  164.69
  -6  14   0  173.07   71.97
  -6  14   0  129.81   43.97
   6  14   0  297.54   30.16
   6  14   0  202.15   29.25
   6 -14   0  177.30   35.78
   6 -14   0  209.26   33.00
  -6 -14   0  281.15   55.02
  -6  14  -1 6382.16  349.20
  -6  14  -1 6191.84  321.17
   6  14   1 6707.36  346.34
   6  14   1 7099.12  368.78
   6 -14   1 7183.65  393.35
   6 -14   1 7030.94  367.17
  -6 -14  -1 6694.55  347.12
  -6  14  -2  240.16   83.76
  -6  14  -2  144.59   37.94
   6  14   2  163.62   33.57
   6 -14   2  285.00   45.96
   6 -14   2  225.55   27.67
  -6 -14  -2  363.66   68.41
  -6  14  -3 1395.98  233.00
   6  14   3  878.21   94.19
  -6 -14  -3 1043.44  108.50
   6 -14   3  870.16   97.20
   6 -14   3 1065.84  166.99
  -6  14  -4  189.23   67.76
   6  14   4  361.33   65.97
  -6 -14  -4  261.67   66.65
   6 -14   4  271.15   67.63
   6 -14   4  215.62   53.67
  -6  14  -5 1047.43  205.80
   6  14   5 1487.93  165.00
  -6 -14  -5 1404.36  123.47
   6 -14   5 1449.20  143.35
  -6  14  -6   24.37   28.36
   6  14   6   47.22   24.08
  -6 -14  -6   64.11   33.82
   6 -14   6   59.57   42.83
  -6  14  -7 2956.46  201.62
   6  14   7 3368.22  224.05
  -6 -14  -7 3390.72  209.78
   6 -14   7 3545.45  297.58
   6  14   8   60.48   53.25
  -6 -14  -8  144.28   52.26
   6 -14   8  208.68   84.15
   6  14   9  584.24  173.84
  -6 -14  -9  750.41   88.25
   6 -14   9  765.05  109.15
   6 -16 -10  517.20  191.65
   6 -16  -9   41.17   37.74
   6 -16  -8  368.89   55.90
   6  16  -7  293.08   56.45
   6 -16  -7  299.07   66.91
   6  16  -6  641.72   84.60
   6  16  -6  560.43   74.58
   6  16  -6  742.49  107.00
   6 -16  -6  720.00  149.98
   6  16  -5 2723.83  203.23
   6  16  -5 2938.09  207.55
   6 -16  -5 2897.55  251.54
  -6 -16   5 3140.81  280.83
  -6  16   4 4278.78  472.53
   6  16  -4 5483.99  309.07
   6  16  -4 4735.01  276.08
  -6 -16   4 6409.89  420.90
  -6  16   3 5697.10  649.72
   6  16  -3 5870.31  273.26
   6  16  -3 6032.68  286.83
  -6 -16   3 6300.28  300.69
  -6  16   2  285.33  122.43
  -6  16   2  155.69   33.45
   6  16  -2  195.64   32.65
   6  16  -2   50.20   26.90
   6 -16  -2  193.03   37.88
  -6 -16   2  204.61   43.97
  -6  16   1  237.62   50.96
   6  16  -1  252.35   48.03
   6  16  -1  256.56   25.81
   6 -16  -1  323.41   49.44
  -6 -16   1  314.08   52.02
  -6  16   0 3845.09  359.56
  -6  16   0 3006.43  167.40
   6  16   0 3034.93  162.55
   6  16   0 3051.66  165.18
   6 -16   0 3187.16  172.72
  -6 -16   0 3435.99  182.85
  -6  16  -1 1020.76  159.40
  -6  16  -1  651.76  138.58
   6  16   1  822.73  170.86
   6  16   1 1163.04  266.74
   6 -16   1  989.14  171.51
   6 -16   1 1350.63  136.70
  -6 -16  -1 1070.44  153.37
  -6  16  -211701.91  562.80
   6  16   211436.22  536.10
  -6  16  -210257.06  479.64
   6 -16   212287.15  578.14
  -6 -16  -211829.19  549.27
  -6  16  -3 3170.99  392.47
   6  16   3 2693.01  177.88
  -6 -16  -3 2932.66  179.25
   6 -16   3 3212.06  200.06
   6 -16   3 2900.09  187.60
   6  16   4   98.40   30.75
  -6 -16  -4  115.25   35.45
   6 -16   4  164.01   68.29
   6 -16   4   54.59   22.82
  -6  16  -5  217.78   73.91
   6  16   5  219.33   62.41
  -6 -16  -5  278.71   57.46
   6 -16   5  303.22   79.50
  -6  16  -6 4994.16  470.51
   6  16   6 3659.37  346.54
  -6 -16  -6 3968.02  368.61
   6 -16   6 4220.80  529.70
   6  16   7  178.06   64.01
  -6 -16  -7   85.91   23.87
   6 -16   7  180.17   66.90
   6  16   8 3526.29  270.40
  -6 -16  -8 3924.54  264.56
   6  16   9 1542.21  342.29
  -6 -16  -9 1494.59  255.62
   6 -16   9 1526.75  279.14
   6 -18 -10   86.43   54.60
   6 -18  -9   14.55   36.32
   6  18  -8  303.52   60.30
   6 -18  -8   43.33   42.26
   6  18  -7  661.52   49.61
   6 -18  -7  631.14   64.32
   6  18  -6  256.07   54.93
   6 -18  -6  276.52   58.33
   6  18  -5 2906.98  237.37
  -6 -18   5 2400.06  240.43
   6 -18  -5 2984.54  246.03
   6  18  -4 2303.05  173.05
  -6 -18   4 1810.16  324.74
   6 -18  -4 2060.25  160.40
  -6  18   3 2328.35  415.32
   6  18  -3 2707.04  156.88
   6  18  -3 2493.42  152.37
  -6 -18   3 3208.77  224.15
  -6  18   2   -1.35   62.51
   6  18  -2   64.50   26.06
   6  18  -2   91.46   33.01
  -6 -18   2   42.11   20.19
  -6  18   1  212.88   67.79
   6  18  -1    1.71   20.79
  -6  18   1   56.38   21.83
   6 -18  -1   50.26   18.32
  -6 -18   1  108.84   24.05
  -6  18   0 1382.94  173.70
  -6  18   0 1187.67  226.18
   6  18   0 1257.31  223.64
   6  18   0 1258.43  226.33
   6 -18   0 1421.39  117.27
  -6 -18   0 1464.04  101.58
  -6  18  -1 5770.87  360.81
   6  18   1 6079.61  350.82
  -6  18  -1 4839.25  280.24
   6 -18   1 5484.13  319.49
  -6 -18  -1 5706.63  328.29
  -6  18  -2  273.97   68.23
   6  18   2  209.91   54.77
  -6  18  -2  107.79   35.92
   6 -18   2  141.40   38.64
  -6 -18  -2  141.83   35.66
  -6  18  -3 1693.96  381.64
   6  18   3 1811.09  328.87
  -6 -18  -3 2000.21  156.38
   6 -18   3 2001.22  159.83
   6 -18   3 1624.45  213.09
  -6  18  -4 1371.45  271.43
   6  18   4 1568.73  125.05
  -6 -18  -4 1418.74  108.12
   6 -18   4 1474.70  140.23
  -6  18  -5   38.69   46.14
   6  18   5   86.27   41.69
  -6 -18  -5   83.08   43.38
   6 -18   5   -1.72   35.39
  -6  18  -6  158.78   61.66
   6  18   6  126.80   40.79
  -6 -18  -6  156.39   45.49
   6 -18   6  188.66   57.33
  -6  18  -7 1131.29  262.95
   6  18   7 1211.49  272.18
  -6 -18  -7 1164.64  121.68
   6  18   8  244.93   77.87
  -6 -18  -8  136.39   60.03
   6 -18   8  147.53   46.83
   6  18   9  122.02   58.52
  -6 -18  -9  177.29   61.74
   6 -18   9  106.91   61.60
   6 -20 -10  466.90  122.90
   6  20  -9   67.28   32.32
   6 -20  -9   40.86   41.39
   6  20  -8  187.90   44.99
   6 -20  -8  267.76   84.94
   6  20  -7 1808.22  189.94
   6 -20  -7 2044.83  216.17
   6  20  -6 1459.63  235.96
   6 -20  -6 1743.41  172.60
   6  20  -5  419.05   89.20
   6 -20  -5  296.27   57.06
   6  20  -4 2413.67  202.07
   6  20  -4 2299.21  181.72
   6 -20  -4 2196.16  196.67
  -6 -20   4 1696.36  158.45
  -6  20   3 1299.65  389.70
   6  20  -3 1496.24  160.11
   6  20  -3 1745.54  315.91
  -6 -20   3 1732.08  326.56
  -6  20   2  202.79   86.77
   6  20  -2   71.96   40.32
   6  20  -2   28.22   16.03
  -6  20   2   16.73    6.61
  -6  20   2    3.18    3.28
  -6 -20   2   16.85   11.37
  -6  20   1  864.71  153.82
  -6  20   1  622.95   71.76
   6  20  -1  299.93   84.90
   6  20  -1  566.54  122.75
   6 -20  -1  560.52   98.57
  -6 -20   1  725.18   90.61
  -6  20   0  777.29  127.31
  -6  20   0  302.93   78.02
   6  20   0  335.31   74.70
   6  20   0  812.45  126.39
   6 -20   0  677.90   81.81
  -6 -20   0  735.12  111.62
  -6  20  -1  171.98   83.99
   6  20   1  114.94   41.93
  -6 -20  -1   89.09   32.01
   6 -20   1  127.26   41.44
  -6  20  -2 1513.34  333.37
   6  20   2 1511.76  217.65
  -6 -20  -2 1795.64  324.27
   6 -20   2 1750.14  320.77
  -6  20  -3   43.33   45.23
   6  20   3    1.86   21.03
  -6 -20  -3   49.76   25.22
   6 -20   3   70.45   30.78
  -6  20  -4 1365.08  260.36
   6  20   4 1800.51  157.40
  -6 -20  -4 1784.90  156.02
   6 -20   4 1672.28  193.97
  -6  20  -5   97.20   66.82
   6  20   5   79.48   33.19
  -6 -20  -5   82.68   32.13
   6 -20   5  182.18   50.22
   6  20   6    3.04   26.01
  -6 -20  -6  100.47   33.81
   6 -20   6  103.04   53.08
   6  20   7   64.65   60.51
  -6 -20  -7   38.40   18.87
   6 -20   7   89.85   53.29
  -6 -20  -8    2.17   25.73
   6 -20   8   -2.32   46.45
   6  22  -9  190.80  114.97
   6 -22  -9  392.72  163.25
   6  22  -8 1095.22  194.81
   6 -22  -8  812.31  289.57
   6  22  -7 1894.30  223.95
   6 -22  -7 2022.47  197.73
   6  22  -6 2125.43  153.86
   6 -22  -6 2112.88  197.69
   6  22  -5 1691.38  234.82
   6 -22  -5 1793.04  176.87
   6  22  -4  194.85   60.34
  -6 -22   4  144.23   48.93
   6 -22  -4  317.57   74.43
   6  22  -3 4978.42  337.88
  -6 -22   3 4016.87  268.36
   6 -22  -3 3490.00  241.21
  -6  22   217139.08 3140.49
   6  22  -215778.50 2878.30
   6  22  -216100.75 2935.96
  -6  22   211965.27 2180.69
  -6  22   212353.70 2251.35
  -6 -22   215454.60 2817.94
  -6  22   1  250.19  106.75
   6  22  -1   48.21   27.50
   6  22  -1   22.31   22.86
  -6 -22   1   51.06   20.22
  -6  22   0 6157.73  596.28
   6  22   0 4934.23  391.29
  -6  22   0 4519.92  356.61
   6 -22   0 5198.17  411.80
  -6 -22   0 5282.83  416.28
  -6  22  -1  241.48   91.47
   6  22   1  271.40   83.11
  -6 -22  -1  317.19   56.54
   6 -22   1  362.13   67.31
  -6  22  -2  226.12   80.72
   6  22   2  374.49   83.30
  -6 -22  -2  386.51   65.33
   6 -22   2  558.62  115.21
  -6  22  -3 3863.91  329.54
   6  22   3 3073.97  245.46
  -6 -22  -3 3634.69  286.67
   6 -22   3 3843.18  346.38
  -6  22  -4 4881.31  500.92
   6  22   4 4908.19  461.17
  -6 -22  -4 5004.54  458.31
   6 -22   4 4426.44  426.52
  -6  22  -5  211.71   68.37
   6  22   5  236.36   57.25
  -6 -22  -5  183.96   42.32
   6 -22   5  194.50   58.07
  -6  22  -6 2577.71  315.08
   6  22   6 3017.12  285.52
  -6 -22  -6 3547.06  331.72
   6 -22   6 3873.03  370.67
   6  22   7 1706.74  268.32
  -6 -22  -7 2225.78  161.51
   6 -22   7 1346.94  367.91
   6  22   8  994.30  364.33
  -6 -22  -8 1381.13  296.78
   6 -22   8 1211.56  339.81
   6  24  -9   24.12   25.13
   6 -24  -9   63.79   22.03
   6  24  -8   41.97   48.45
   6 -24  -8   74.47   44.53
   6  24  -7 1204.51  192.60
   6 -24  -7  941.85  257.89
   6  24  -6  170.90   46.09
   6 -24  -6  124.35   36.91
   6  24  -5   68.94   20.99
   6 -24  -5   29.66   34.84
   6  24  -4  899.79  142.01
  -6 -24   4  460.08   68.69
   6 -24  -4  945.44   89.97
   6  24  -3   62.55   30.31
   6  24  -3   22.90   18.28
   6 -24  -3  129.10   35.65
  -6 -24   3   35.46   15.24
  -6  24   2  138.53   35.15
   6  24  -2  220.91   47.46
   6  24  -2  322.27   71.46
  -6 -24   2  238.74   64.34
  -6  24   1 8553.70  669.52
  -6  24   1 7727.55  511.54
   6  24  -1 8797.14 1744.73
  -6 -24   1 9025.20 1788.94
  -6  24   0  422.61  122.85
   6  24   0  315.43   75.37
  -6 -24   0  372.51   77.05
   6 -24   0  117.96   48.24
  -6  24  -1 2086.72  417.28
   6  24   1 2806.82  198.87
  -6  24  -1 2214.79  160.06
   6 -24   1 2740.70  265.83
  -6 -24  -1 2624.88  184.09
  -6  24  -2  739.68  151.96
   6  24   2  894.27  188.27
  -6 -24  -2  996.75   53.12
   6 -24   2  844.01  175.97
  -6  24  -3  285.15   60.88
   6  24   3  312.18   84.19
  -6 -24  -3  411.92   55.28
   6 -24   3  412.55   61.83
  -6  24  -4  366.96   98.53
   6  24   4  264.51   54.23
  -6 -24  -4  243.45   81.68
   6 -24   4  280.08   65.04
  -6  24  -5 1390.72  225.52
   6  24   5 1541.02  222.93
  -6 -24  -5 1375.97  204.71
   6 -24   5 1345.08  266.20
   6  24   6   50.83   28.76
  -6 -24  -6   91.21   44.26
   6 -24   6   50.17   48.27
   6  24   7   76.37   50.65
  -6 -24  -7  163.03   57.64
   6 -24   7   35.32   27.16
   6  24   8  356.00  110.77
  -6 -24  -8  251.99  107.25
   6 -24   8  164.83   61.66
   6  26  -8   80.34   51.73
   6 -26  -8  178.69   51.50
   6  26  -7  639.93  154.36
   6 -26  -7  613.14  137.18
   6 -26  -6   80.16   43.32
   6  26  -5  356.78   91.58
   6 -26  -5  244.31   69.11
   6  26  -4  113.18   42.81
   6 -26  -4   47.78   30.29
   6  26  -3  132.01   37.78
   6 -26  -3  235.75   64.29
   6  26  -2 2529.41  250.41
   6  26  -2 2152.24  199.54
  -6  26   2 2392.71  215.78
   6 -26  -2 2403.34  242.81
  -6 -26   2 2613.95  240.08
  -6  26   1  251.12  108.84
   6  26  -1   45.25   19.86
  -6 -26   1   43.17   27.87
  -6  26   0  128.83   48.31
   6  26   0   98.00   42.45
  -6 -26   0   63.83   20.98
  -6  26  -1  365.31   80.15
   6  26   1  302.08   76.26
  -6 -26  -1  273.01   76.62
   6 -26   1  287.73   78.52
   6  26   2   48.48   16.12
  -6 -26  -2   62.02   22.06
   6 -26   2   58.69   17.71
   6  26   3  147.82   40.09
  -6 -26  -3  203.92   51.09
   6 -26   3  144.97   36.27
  -6  26  -4  180.58   86.30
   6  26   4  279.16   54.42
  -6 -26  -4  263.94   57.07
   6 -26   4  205.98   87.94
  -6  26  -5  365.27  101.16
   6  26   5  513.48   96.95
  -6 -26  -5  470.69   46.87
   6 -26   5  219.46   50.25
   6  26   6   62.47   29.50
  -6 -26  -6   47.93   33.76
   6 -26   6  -19.65   45.44
  -6 -26  -7   56.99   30.60
   6 -26   7  110.02   57.93
   6  28  -7  205.33   38.33
   6 -28  -7  311.44   76.66
   6  28  -6  336.75  121.69
   6 -28  -6  224.30   83.95
   6  28  -5  306.66   95.14
   6 -28  -5  470.10  114.26
   6  28  -4 1450.22  158.87
   6 -28  -4 1660.08  213.34
   6  28  -3   25.68   27.69
  -6 -28   3   35.77   11.64
   6 -28  -3   25.33   34.22
   6  28  -2  422.04   76.87
  -6 -28   2  442.80   34.56
   6 -28  -2  487.63   50.57
  -6  28   1  455.03   70.28
   6  28  -1  608.80   50.68
   6 -28  -1  698.93  115.47
  -6 -28   1  512.50  112.88
   6  28   0 1403.48  104.21
  -6 -28   0 1453.24  119.55
  -6  28  -1  105.13  102.00
   6  28   1  301.82   72.14
  -6 -28  -1  290.54   73.95
  -6  28  -2  689.95  195.39
   6  28   2  879.40  209.16
  -6 -28  -2 1232.93  135.41
   6 -28   2  776.57  220.68
   6  28   3  174.95   52.42
  -6 -28  -3  171.32   48.12
   6 -28   3  100.06   54.31
   6  28   4  446.82   59.45
  -6 -28  -4  379.66  108.60
   6 -28   4  419.36   98.08
   6  28   5 2494.37  226.45
  -6 -28  -5 1798.41  162.88
   6 -28   5 1266.91  379.10
   6  28   6  784.75  126.67
  -6 -28  -6  637.13  182.73
   6 -28   6  822.66  205.57
   6  30  -7   35.59   25.72
   6 -30  -7   84.98   71.98
   6  30  -6  854.12  281.19
   6 -30  -6 1592.37  276.22
   6  30  -5  518.95  173.51
   6 -30  -5  539.13  177.14
   6 -30  -4  148.04   51.46
   6  30  -3 2676.90  250.17
   6 -30  -3 2753.95  257.47
   6  30  -2  987.64  203.55
  -6 -30   2 1021.70  155.97
   6 -30  -2 1006.59  241.76
   6  30  -1  117.41   43.32
  -6 -30   1   88.67   26.30
   6 -30  -1  131.12   42.21
   6  30   0  117.64   35.24
  -6 -30   0  166.01   43.69
   6 -30   0  191.43   65.73
   6  30   1 3495.30  322.90
  -6 -30  -1 3365.80  308.11
   6 -30   1 3098.79  284.86
  -6  30  -2  195.23  118.45
   6  30   2  135.97   44.20
  -6 -30  -2  104.08   41.84
   6  30   3 1002.69  143.62
  -6 -30  -3  882.82  125.63
   6 -30   3  667.97  193.91
   6  30   4  963.72   99.31
  -6 -30  -4  792.82  241.35
   6 -30   4  709.79  246.48
   6  30   5   54.98   40.63
  -6 -30  -5   16.21   33.31
  -6 -30  -6   30.98   43.48
   6 -30   6   78.12   35.69
   6 -32  -6  259.66   79.89
   6  32  -5  371.60  100.90
   6 -32  -5  359.23   87.51
   6  32  -4 1019.91  162.09
   6 -32  -4 1117.96  183.42
   6  32  -3  342.48   48.57
   6 -32  -3  291.28  117.09
   6  32  -2   26.64   31.23
   6 -32  -2   64.46   35.82
   6  32  -1 2754.11  187.55
  -6 -32   1 2878.54  189.92
   6 -32  -1 3204.18  220.24
   6  32   0  145.86   57.12
  -6 -32   0  132.74   56.06
   6 -32   0  220.39   38.61
  -6 -32  -1  241.48  103.73
   6 -32   1  470.97  131.95
   6  32   2  399.41  121.40
  -6 -32  -2  700.57  149.12
   6 -32   2  272.91   89.61
  -6 -32  -3  539.07  149.73
   6 -32   3  370.68  144.42
   6  32   4  367.33   87.64
  -6 -32  -4  308.76   74.18
   6 -32   4  262.81   92.96
   6  32   5  198.27   87.21
  -6 -32  -5  203.63   95.58
   6 -32   5   97.94   43.41
   6 -34  -4  551.41  212.66
   6  34  -3  161.79   39.03
   6 -34  -3  175.93   49.80
   6  34  -2  518.62  146.85
   6 -34  -2  352.46  195.20
   6  34  -1  156.44   40.05
   6 -34  -1  154.16   65.33
   6  34   0   46.16   20.66
   6  34   1 1597.63  276.86
  -6 -34  -1 1359.79  232.21
   6 -34   1 1005.51  237.61
   6  34   2  151.49   49.39
  -6 -34  -2  135.10   69.23
   6 -34   2  169.47   82.03
   6  34   3   51.95   21.16
  -6 -34  -3   44.63   20.73
   6  36  -3  366.74  100.55
   6 -36  -3  241.29   71.30
   6 -36  -2  498.15  220.92
   6  36  -1  583.83  110.49
   6  36   0   54.19   28.30
   6 -36   0   27.28   15.21
  -6 -36  -1  106.61   31.39
   6 -36   1  183.26   80.80
   7  -1 -10   33.78   37.30
   7   1  -9  319.12   64.40
   7   1  -9  437.77   41.36
   7  -1  -9  290.82   71.94
   7   1  -8  384.68  123.41
   7   1  -8  479.86   68.90
   7  -1  -8  382.08   75.81
   7  -1  -8  478.24   69.90
   7   1  -7   29.60   16.41
   7   1  -7  106.88   35.58
   7   1  -7   53.41   26.63
   7   1  -7   75.35   27.24
   7  -1  -7   35.12   27.67
   7  -1  -7  127.03   44.14
   7  -1  -7   57.52   16.25
  -7   1   6 6825.46  437.18
   7   1  -6 6848.46  390.98
  -7  -1   6 6779.80  412.02
   7  -1  -6 6736.48  387.53
   7  -1  -6 6500.79  367.16
   7  -1  -6 8133.87  476.84
  -7   1   5  227.41   66.37
   7   1  -5   34.61   21.38
   7   1  -5   37.58   14.02
  -7  -1   5  204.50   55.86
   7  -1  -5   48.22   20.20
   7  -1  -5   36.26   12.49
  -7   1   4   67.38   67.45
   7   1  -4   35.38   22.30
   7   1  -4   43.37   11.18
  -7  -1   4  151.47   30.10
   7  -1  -4   26.78   19.68
   7  -1  -4  116.03   23.06
  -7   1   3   66.70   27.02
   7   1  -3  165.28   35.97
   7   1  -3  124.72   19.13
  -7  -1   3  243.64   83.43
   7  -1  -3  126.64   26.08
   7  -1  -3   84.46   15.96
  -7   1   2 1776.50  222.49
   7   1  -2 1572.99   67.54
   7   1  -2 1815.95   75.39
  -7   1   2 1424.38   55.63
  -7  -1   2 2009.22  183.09
   7  -1  -2 1526.45   62.36
   7  -1  -2 1642.48   92.81
  -7  -1   2 1336.80   51.98
  -7   1   1  946.86   63.73
  -7   1   1  795.79  109.95
   7   1  -1 1004.66  117.25
   7   1  -1  960.54  107.33
   7  -1  -1  826.63   59.24
   7  -1  -1  828.62   61.19
  -7  -1   1  938.83   65.73
  -7  -1   1 1018.93  148.77
  -7   1   011519.40  365.74
  -7   1   012142.26  394.54
   7   1   012918.05  411.69
   7   1   011353.88  363.97
   7  -1   012744.37  406.28
   7  -1   014726.00 1340.44
  -7  -1   012183.79  385.76
  -7  -1   013091.36  424.01
   7   1   1   40.55   28.67
  -7   1  -1   13.67   20.67
   7   1   1   32.30   19.80
  -7   1  -1   28.61   26.08
   7  -1   1   65.34   37.70
  -7  -1  -1    9.49   11.47
  -7  -1  -1   13.62   28.48
  -7   1  -2  750.76   82.08
   7   1   2  609.54   70.61
   7   1   2  588.09   99.51
  -7   1  -2  612.06   74.63
   7  -1   2  669.33   91.24
   7  -1   2  677.73  127.18
  -7  -1  -2  552.34   93.41
  -7  -1  -2  576.31   63.55
  -7   1  -3 1109.44   73.12
   7   1   3 1125.63   88.60
  -7  -1  -3 1176.16  127.62
   7  -1   3 1127.40  127.85
  -7   1  -4 2480.18  172.92
   7   1   4 2738.18  192.46
  -7  -1  -4 2762.93  183.81
   7  -1   4 2725.99  152.79
  -7   1  -5  554.84  112.01
   7   1   5  576.99  124.04
  -7  -1  -5  573.44   93.80
   7  -1   5  462.25   72.68
  -7   1  -6 3578.81  250.46
   7   1   6 3010.31  261.77
  -7  -1  -6 3770.88  261.57
   7  -1   6 3331.93  293.93
  -7   1  -7  -24.17   19.68
   7   1   7  128.37   64.47
  -7  -1  -7   49.92   26.86
   7  -1   7  131.11   56.70
  -7   1  -8  115.73   36.62
  -7  -1  -8  113.66   36.12
   7  -1   8  114.35   59.15
   7   1   9  866.69  254.09
  -7   1  -9  581.97  168.38
   7  -1   9  865.68  145.67
  -7  -1  -9  518.96  210.96
  -7   1 -10  220.10  116.87
   7   1  10  413.43  189.16
  -7  -1 -10  519.46  163.92
   7  -3 -11   53.36   20.07
   7  -3  -9  256.40   80.25
   7   3  -8 1531.79  126.72
   7   3  -8 1313.22  109.17
   7  -3  -8 1101.52  120.64
   7  -3  -8 1029.22  204.36
   7   3  -7  416.62  108.40
   7   3  -7  888.20  129.48
   7   3  -7  937.09  157.34
   7  -3  -7  900.42  200.04
   7  -3  -7  523.71  133.77
   7  -3  -7  939.34  134.44
  -7   3   6 1489.45  313.49
   7   3  -6 1759.61  107.88
   7   3  -6 1713.20  114.51
   7  -3  -6 1849.13  109.98
  -7  -3   6 1820.56  231.80
   7   3  -5  364.74   58.05
  -7   3   5  540.04  118.62
   7   3  -5  347.19   84.25
   7   3  -5  283.72   89.44
   7  -3  -5  303.47   69.28
   7  -3  -5  415.48  127.25
   7  -3  -5  350.13   69.21
  -7  -3   5  280.78   66.67
  -7   3   4 4555.60  270.39
   7   3  -4 3782.07  200.07
  -7  -3   4 3368.86  207.36
   7  -3  -4 3009.15  166.69
   7  -3  -4 3913.36  203.25
  -7   3   3  134.75   39.68
   7   3  -3   49.73   22.66
   7   3  -3   15.15    8.18
  -7  -3   3   15.76   40.34
   7  -3  -3   14.97   20.57
   7  -3  -3   52.01   19.90
  -7   3   2 3138.37  144.95
  -7   3   2 3237.17  112.48
   7   3  -2 2946.76  105.54
   7   3  -2 3053.15  107.52
   7  -3  -2 2984.26  104.67
   7  -3  -2 3398.32  148.32
  -7  -3   2 2988.34  107.76
  -7   3   1 4767.27  198.09
   7   3  -1 4185.24  147.88
   7   3  -1 3911.33  133.94
  -7   3   1 3728.97  125.63
  -7  -3   1 3910.62  143.48
   7  -3  -1 3654.26  127.19
  -7  -3   1 3992.87  135.83
   7  -3  -1 4815.07  170.03
  -7   3   0 7316.89  237.83
   7   3   0 6941.36  227.57
   7   3   0 7025.31  236.12
  -7  -3   0 8076.67  272.14
   7  -3   0 7488.70  255.45
   7  -3   0 6533.48  215.92
  -7  -3   0 6515.34  218.95
  -7   3  -1 2436.40  107.27
   7   3   1 2718.62  115.02
   7   3   1 2130.31   83.52
  -7   3  -1 2161.24   93.25
  -7  -3  -1 2103.75   84.55
   7  -3   1 2486.08  105.51
  -7  -3  -1 2459.30  101.32
   7  -3   1 2212.77   83.53
  -7   3  -2 2218.25  152.60
   7   3   2 1796.69   85.79
   7   3   2 1655.09   70.62
  -7   3  -2 1662.96   71.79
   7  -3   2 1953.13  169.74
  -7  -3  -2 1686.30   82.09
   7  -3   2 1561.98   86.16
  -7   3  -3 1366.50  167.84
   7   3   3  960.98   71.05
  -7  -3  -3 1143.26   82.53
   7  -3   3 1135.02  121.53
   7   3   4 1929.34  112.02
  -7   3  -4 2541.88  133.57
   7  -3   4 3029.83  168.82
  -7  -3  -4 2924.38  168.01
  -7   3  -5  473.71   96.74
   7   3   5  526.61   83.40
  -7  -3  -5  415.07   60.10
   7  -3   5  438.06   78.55
  -7   3  -6 2924.93  205.41
   7   3   6 2996.18  308.38
  -7  -3  -6 3180.98  225.92
   7  -3   6 3314.49  242.67
  -7   3  -7   56.10   26.05
   7   3   7   59.80   39.89
  -7  -3  -7   34.61   22.25
   7  -3   7   28.71   46.72
  -7   3  -8  485.38  159.54
   7   3   8  748.32  114.39
  -7  -3  -8  534.11  162.93
  -7   3  -9   30.42   23.48
   7   3   9  172.69   75.08
  -7  -3  -9   60.98   25.96
  -7   3 -10  375.62  202.13
   7   3  10 1198.00  234.52
  -7  -3 -10 1275.37  226.09
   7  -3  10 1198.85  222.55
   7  -5 -11   87.82   45.71
   7  -5 -10 1311.35  108.03
   7  -5  -9   31.60   29.02
   7  -5  -9   39.27   14.06
   7   5  -8   12.85   12.35
   7   5  -8   86.13   35.99
   7   5  -8   94.61   36.69
   7  -5  -8   94.49   37.00
   7  -5  -8  122.45   32.05
   7   5  -7    2.29    9.97
   7   5  -7   26.37   19.64
   7   5  -7   39.17   33.47
   7  -5  -7  141.22   51.17
   7  -5  -7   34.45   22.67
   7  -5  -7    5.83    6.94
   7   5  -6  109.65   28.55
  -7   5   6  215.59   88.20
   7  -5  -6   57.32   19.87
  -7  -5   6  -30.87   36.88
  -7   5   5  672.86  146.47
   7   5  -5  365.36   91.00
   7   5  -5  545.65   94.05
   7   5  -5  528.65  110.90
  -7  -5   5  588.52  108.28
   7  -5  -5  555.39   79.59
   7  -5  -5  556.97  100.25
  -7   5   4 2166.09  164.73
   7   5  -4 2318.41  160.25
   7   5  -4 1951.61  109.03
  -7  -5   4 1974.13  187.43
   7  -5  -4 1863.52  114.25
   7  -5  -4 2283.94  121.71
  -7   5   3  100.92   50.31
   7   5  -3   91.83   23.76
   7   5  -3   43.59   13.46
  -7  -5   3   67.89   37.55
   7  -5  -3   26.60   16.78
   7  -5  -3   34.45   27.37
  -7   5   2  516.69   79.57
  -7   5   2  455.38   32.20
   7   5  -2  463.58   37.40
   7   5  -2  505.03   43.19
   7  -5  -2  359.56   84.78
   7  -5  -2  458.22   71.42
  -7  -5   2  573.28   72.29
  -7  -5   2  537.75   50.11
  -7   5   1  -11.60   53.30
  -7   5   1   17.46    7.38
   7   5  -1   37.04   14.07
   7   5  -1   69.97   22.88
   7  -5  -1   62.11   24.86
  -7  -5   1   70.64   32.74
  -7  -5   1   53.64   23.06
   7  -5  -1   50.25   27.24
   7   5   0  744.82   69.96
  -7   5   0  723.81  108.21
  -7   5   0  804.94   56.04
   7   5   0  813.99  123.43
   7  -5   0  720.63   64.65
   7  -5   0  723.03  110.42
  -7  -5   0  967.03   76.04
  -7  -5   0  681.17   52.98
  -7   5  -1  372.53   48.97
  -7   5  -1  271.46   55.85
   7   5   1  326.51   30.75
   7   5   1  291.84   46.54
   7  -5   1  295.62   39.48
   7  -5   1  485.23   88.78
  -7  -5  -1  491.50   75.07
  -7  -5  -1  297.56   45.95
  -7   5  -2 2157.63  132.44
  -7   5  -2 1729.73   76.94
   7   5   2 2230.16  105.85
   7   5   2 1973.77   82.55
  -7  -5  -2 2210.82   89.45
   7  -5   2 1961.42   78.52
  -7  -5  -2 2128.30   88.47
   7  -5   2 2101.14  101.06
  -7   5  -3  623.47   86.49
   7   5   3  620.46   65.11
  -7  -5  -3  627.49  104.60
   7  -5   3  566.71   78.94
  -7   5  -4  172.65   54.76
   7   5   4  197.54   51.61
  -7  -5  -4  195.57   50.26
   7  -5   4  269.46   67.85
  -7   5  -5 1005.32  138.05
   7   5   5 1230.03  216.81
  -7  -5  -5 1275.63  150.04
   7  -5   5 1373.12  173.41
  -7   5  -6 1441.69  111.62
   7   5   6 1593.97  132.18
  -7  -5  -6 1490.84  113.73
   7  -5   6 1603.31  150.35
  -7   5  -7   62.21   22.64
   7   5   7  102.91   45.13
  -7  -5  -7   33.61   12.28
   7  -5   7  116.59   42.27
  -7   5  -8 1186.14  215.92
   7   5   8 1496.48  370.61
  -7  -5  -8 1532.29  165.66
   7  -5   8 1941.23  231.11
  -7   5  -9  207.51  101.63
   7   5   9  343.03   74.29
  -7  -5  -9  277.64   71.39
   7  -5   9  201.94   66.69
  -7   5 -10   16.34   26.60
   7   5  10  155.26   73.24
  -7  -5 -10  247.10   75.75
   7  -5  10  111.78   57.13
   7  -7 -11  159.56   51.22
   7  -7 -10 1171.32  171.95
   7   7  -9   45.97   25.09
   7  -7  -9   25.59   19.79
   7   7  -8  471.44  111.06
   7   7  -8  842.01  131.86
   7   7  -8 1059.19  116.34
   7  -7  -8 1094.77  105.49
   7  -7  -8  986.66   80.09
   7   7  -7  850.39  134.65
   7   7  -7 1046.25  116.56
   7   7  -7  970.78  148.13
   7  -7  -7  720.99   98.86
   7  -7  -7  940.59  124.24
   7  -7  -7 1073.39   88.69
  -7   7   6 1011.10  326.72
   7   7  -6 1493.41  162.49
   7   7  -6 1302.31  156.70
  -7  -7   6 1175.27  250.54
   7  -7  -6 1239.67  135.29
   7  -7  -6 1286.22  136.76
  -7   7   5  898.09  139.30
   7   7  -5  633.23   89.12
   7   7  -5  702.75   92.66
  -7  -7   5  775.70  120.34
   7  -7  -5  763.71   80.25
   7  -7  -5  738.61   78.49
  -7   7   4 4432.54  375.62
   7   7  -4 4337.12  225.83
   7   7  -4 4419.41  231.37
  -7  -7   4 4488.81  249.74
   7  -7  -4 4481.66  238.89
   7  -7  -4 4828.16  246.63
  -7   7   3  149.96   87.48
   7   7  -3   27.36   19.85
   7   7  -3   18.87    8.85
  -7  -7   3   72.64   44.66
   7  -7  -3   14.78   13.69
   7  -7  -3   48.88   25.76
  -7   7   2 6719.33  284.09
  -7   7   2 8017.81  255.69
   7   7  -2 8390.86  272.04
   7   7  -2 7312.59  247.57
  -7  -7   2 7644.66  256.62
   7  -7  -2 8389.72  271.66
   7  -7  -2 7085.71  242.98
  -7  -7   2 7857.59  262.25
  -7   7   1 3178.53  403.31
  -7   7   1 3059.86  111.51
   7   7  -1 3314.96  125.96
   7   7  -1 2936.08  111.04
  -7  -7   1 3507.26  133.05
   7  -7  -1 2893.07  109.50
  -7  -7   1 3117.49  111.40
  -7   7   0 3454.38  235.07
   7   7   0 3138.18  122.73
   7   7   0 2953.68  107.81
  -7   7   0 2958.77  106.88
   7  -7   0 3448.95  139.42
   7  -7   0 2914.99  113.85
  -7  -7   0 3038.28  115.26
  -7  -7   0 2610.85   95.94
  -7   7  -1  397.31   69.57
   7   7   1  412.22   49.84
   7   7   1  517.87   80.93
  -7   7  -1  438.85   67.19
  -7  -7  -1  414.83   52.55
   7  -7   1  559.88  117.00
   7  -7   1  483.60   88.01
  -7  -7  -1  415.97   81.74
  -7   7  -2 8658.72  460.48
   7   7   210068.73  522.33
  -7   7  -2 9893.26  509.15
   7  -7   2 9497.40  493.25
  -7  -7  -2 9267.57  475.76
   7  -7   2 9083.45  465.14
  -7   7  -3 1696.96  222.37
   7   7   3 1280.69  251.03
  -7  -7  -3 1379.25   81.40
   7  -7   3 1558.19  226.67
  -7   7  -4   54.73   25.91
   7   7   4   81.46   39.80
  -7  -7  -4   89.79   47.22
   7  -7   4   79.85   36.87
  -7   7  -5 3646.95  270.94
   7   7   5 2421.29  190.28
  -7  -7  -5 3100.38  229.94
   7  -7   5 2845.81  221.52
  -7   7  -6  915.00  212.99
   7   7   6  887.23  154.60
  -7  -7  -6  831.99  130.84
   7  -7   6 1064.38  169.34
  -7   7  -7 2001.72  194.42
   7   7   7 1885.77  194.05
  -7  -7  -7 1781.48  194.75
   7  -7   7 1973.16  212.17
  -7   7  -8 3485.66  331.27
   7   7   8 3695.06  378.01
  -7  -7  -8 4474.50  414.61
   7  -7   8 4153.38  395.08
  -7   7  -9   84.55   40.62
   7   7   9  254.40   75.96
  -7  -7  -9  145.15   35.13
   7  -7   9  111.63   48.46
   7   7  10  105.40   57.16
   7  -7  10  261.42  115.41
   7  -9 -11  113.21   44.40
   7  -9 -10  498.23  201.24
   7   9  -9  126.64   45.08
   7   9  -9  180.91   33.71
   7  -9  -9  286.25   51.60
   7   9  -8  336.37  108.68
   7   9  -8  339.28   93.23
   7  -9  -8  395.42   45.39
   7  -9  -8  364.28  137.46
   7   9  -7  647.10  130.11
   7   9  -7  861.76  141.50
   7  -9  -7  702.93   95.87
   7  -9  -7  807.53  106.57
   7  -9  -7  684.79  172.08
  -7   9   6 4925.72  394.25
   7   9  -6 4976.88  368.90
  -7  -9   6 5038.02  382.31
   7  -9  -6 4574.79  323.03
   7  -9  -6 4818.34  337.37
  -7   9   5  200.57   82.39
   7   9  -5  205.84   45.28
   7   9  -5  240.19   60.98
  -7  -9   5  130.82   47.31
   7  -9  -5  198.03   51.22
   7  -9  -5  181.41   43.71
  -7   9   410970.70  904.46
   7   9  -410484.40  483.11
   7   9  -410459.58  485.14
  -7  -9   410343.98  493.07
   7  -9  -4 9947.97  456.51
   7  -9  -410612.83  485.66
  -7   9   3  975.04  110.95
   7   9  -3  751.21   52.07
   7   9  -3  847.49  132.83
   7  -9  -3  723.13   75.93
  -7  -9   3  685.17   90.09
  -7   9   2 2567.00  218.13
   7   9  -2 2583.43   98.86
  -7   9   2 2810.28   93.79
   7  -9  -2 2466.10   88.30
  -7  -9   2 2827.21  121.44
  -7  -9   2 2725.42   99.24
  -7   9   1   74.44   38.29
  -7   9   1   24.14   13.24
   7   9  -1    4.33    7.94
   7   9  -1   62.05   33.35
   7  -9  -1   16.08   12.83
   7  -9  -1   15.83   24.38
  -7  -9   1   38.11   23.90
  -7  -9   1    1.79   16.05
  -7   9   0 2049.36  166.74
   7   9   0 2035.75   94.27
   7   9   0 1947.35   75.73
  -7   9   0 1879.30   72.69
   7  -9   0 2372.69   95.90
   7  -9   0 1955.21   94.53
  -7  -9   0 1969.96   78.62
  -7  -9   0 2005.66   76.14
   7   9   1 8930.86  296.24
   7   9   1 8849.05  289.76
  -7  -9  -1 9719.45  318.33
   7  -9   1 9450.65  320.86
   7  -9   1 8449.96  280.53
  -7   9  -210188.74  530.08
   7   9   211084.07  568.79
  -7   9  -213295.65  680.01
   7  -9   212368.40  648.28
  -7  -9  -212984.11  662.11
  -7   9  -3 1215.98  221.09
   7   9   3 1442.63   91.26
  -7  -9  -3 1526.10  105.25
   7  -9   3 1508.82   99.44
  -7   9  -4 1490.72  153.53
   7   9   4 1676.16  118.49
  -7  -9  -4 2022.93  134.34
   7  -9   4 1379.57  147.73
  -7   9  -5 2432.00  215.47
  -7  -9  -5 2504.68  208.05
   7  -9   5 2288.20  223.44
  -7   9  -6  894.68  210.57
   7   9   6 1100.25  241.19
  -7  -9  -6  894.09  196.80
   7  -9   6  796.36  124.93
  -7   9  -7  392.05   47.93
   7   9   7  482.79  114.47
  -7  -9  -7  413.17  101.44
   7  -9   7  326.62   70.44
   7   9   8 4542.57  467.28
  -7  -9  -8 4980.98  453.13
   7  -9   8 4994.99  466.75
  -7   9  -9  489.93  237.01
   7   9   9  954.70  260.26
  -7  -9  -9  874.59  169.99
   7  -9   9  697.76  313.20
   7   9  10  805.69  163.61
  -7  -9 -10  324.31  121.32
   7  -9  10  528.12  109.31
   7 -11 -11  -42.61   39.90
   7 -11 -10 1341.53  129.12
   7  11  -9  301.17   62.62
   7 -11  -9  492.58   95.62
   7  11  -8  117.19   27.60
   7  11  -8  157.92   31.52
   7 -11  -8  289.61   52.51
   7  11  -7    1.94    7.96
   7  11  -7    8.20   11.61
   7  11  -7   12.12   23.54
   7 -11  -7   21.07   23.58
   7 -11  -7    7.26    4.07
   7 -11  -7   18.47    7.17
   7  11  -6 3284.15  266.01
  -7 -11   6 3205.61  312.54
   7 -11  -6 3302.70  269.39
  -7  11   5  204.59   82.55
   7  11  -5   62.57   21.69
   7  11  -5   84.04   35.53
  -7 -11   5   68.76   28.11
  -7  11   4   84.88   41.61
   7  11  -4   46.70   16.67
   7  11  -4   11.82   10.23
   7 -11  -4   10.71    3.28
  -7 -11   4   89.63   38.11
  -7  11   3 1434.41  178.34
   7  11  -3 1326.47  145.05
   7  11  -3 1239.34  113.05
   7 -11  -3 1031.72   57.24
  -7 -11   3 1045.63  130.07
  -7  11   2  108.18   73.99
  -7  11   2  155.07   17.76
   7  11  -2  115.18   25.89
   7  11  -2  155.74   32.71
   7 -11  -2  122.67   19.52
  -7 -11   2  172.13   31.75
  -7  11   1  743.78  158.46
  -7  11   1  746.05   46.46
   7  11  -1  763.82   60.41
   7  11  -1  786.45  124.05
   7 -11  -1  775.63   81.13
  -7 -11   1  641.16   44.62
  -7  11   0 2660.28  173.93
   7  11   0 2999.34  167.66
   7  11   0 2492.54  134.94
  -7  11   0 2174.13  117.39
   7 -11   0 2841.66  197.67
   7 -11   0 2465.11  137.36
  -7 -11   0 2431.31  134.46
  -7  11  -1 2553.59  166.44
  -7  11  -1 2368.03  132.60
   7  11   1 2105.32  116.83
   7  11   1 2194.25  125.65
   7 -11   1 1953.37  118.66
  -7 -11  -1 2292.35  127.82
  -7  11  -2  130.47   51.92
   7  11   2   92.51   33.08
  -7  11  -2    6.45   29.28
   7 -11   2  116.79   42.34
  -7 -11  -2   29.20   12.75
  -7  11  -3  274.96   71.82
   7  11   3  269.41   66.88
  -7 -11  -3  407.98   85.02
   7 -11   3  302.29   81.02
  -7  11  -4   29.65   25.11
   7  11   4  111.61   54.42
  -7 -11  -4   74.05   30.44
   7 -11   4   37.88   35.15
  -7  11  -5 2610.52  253.92
   7  11   5 2233.83  191.19
  -7 -11  -5 2841.15  232.42
   7 -11   5 2679.83  275.47
  -7  11  -6 5147.68  400.83
   7  11   6 4456.49  353.66
  -7 -11  -6 5449.49  424.11
   7 -11   6 5507.36  436.04
  -7  11  -7   54.70   28.22
   7  11   7   90.44   38.92
   7 -11   7   30.81   43.58
  -7  11  -8  154.70   58.25
   7  11   8  265.90   93.17
  -7 -11  -8   89.02   31.81
  -7  11  -9  513.14  224.36
   7  11   9  979.70  299.82
  -7 -11  -9 1352.23  253.10
   7 -11   9 1313.94  277.08
   7  13 -10  242.92   49.78
   7 -13 -10  327.67   72.32
   7  13  -9  311.44  119.58
   7  13  -8  968.76  140.61
   7 -13  -8  978.48  132.06
   7  13  -7 2189.36  168.24
   7  13  -7 2107.62  194.75
   7 -13  -7 2354.67  192.62
   7  13  -6  345.13   68.28
   7  13  -6  246.18   58.15
   7 -13  -6  282.69   56.36
  -7 -13   6  261.89   74.37
  -7  13   5  261.11  124.32
   7  13  -5   41.94   18.74
   7  13  -5   59.98   26.40
  -7 -13   5   34.60   24.66
  -7  13   4 2409.01  343.24
   7  13  -4 2328.96  136.10
   7  13  -4 2337.40  144.12
  -7 -13   4 3434.48  324.10
  -7  13   3  976.05  189.90
   7  13  -3  884.89  140.28
   7  13  -3  874.92  126.97
  -7 -13   3 1057.40  194.95
  -7  13   2  500.70  115.90
   7  13  -2  283.85   67.90
   7  13  -2  345.03   52.99
  -7  13   2  399.49   65.69
   7 -13  -2  358.07   54.43
  -7 -13   2  433.27   78.37
  -7  13   1  123.46   51.61
   7  13  -1  305.35   34.12
  -7  13   1  170.42   31.46
   7 -13  -1  316.81   38.16
  -7 -13   1  378.66   67.06
  -7  13   0 5549.07  312.89
  -7  13   0 7215.05  373.06
   7  13   0 5544.62  287.53
   7  13   0 6418.79  337.73
   7 -13   0 5901.00  322.22
  -7 -13   0 6351.54  328.87
  -7  13  -1   79.03   57.86
   7  13   1  157.79   33.96
  -7  13  -1   62.45   33.46
   7 -13   1   82.16   41.46
  -7 -13  -1   47.73   16.95
  -7  13  -2 6794.28  347.52
   7  13   2 5314.89  258.60
  -7  13  -2 5793.07  279.70
   7 -13   2 5875.40  290.14
  -7 -13  -2 6201.36  295.59
  -7  13  -3 7431.33  444.33
   7  13   3 6580.18  387.42
  -7 -13  -3 5961.21  345.97
   7 -13   3 6483.27  451.58
  -7  13  -4  527.97   89.94
   7  13   4  388.58   86.16
  -7 -13  -4  623.84  127.53
   7 -13   4  555.69  131.12
  -7  13  -5  725.44  146.06
   7  13   5  747.08  170.46
  -7 -13  -5  662.66  150.89
   7 -13   5  993.67  219.35
  -7  13  -6   91.48   41.33
   7  13   6  246.26   57.87
  -7 -13  -6  286.46   67.45
   7 -13   6  214.73   67.85
   7  13   7 1732.27  202.93
  -7 -13  -7 1862.92  196.07
   7 -13   7 1506.62  341.12
   7  13   8 1413.74  227.12
  -7 -13  -8 1937.01  143.16
   7 -13   8 1843.93  156.78
  -7 -13  -9  199.15   71.05
   7 -13   9  250.16   67.21
   7  15 -10  203.07   47.49
   7 -15 -10  534.83  114.15
   7  15  -9  878.91  125.78
   7 -15  -9  869.74  127.98
   7  15  -8 1137.48  126.85
   7 -15  -8 1176.12  134.15
   7  15  -7   20.37    9.52
   7  15  -7   13.07   27.55
   7  15  -6 1033.50  102.92
  -7 -15   6  925.42  104.74
   7 -15  -6 1046.13  102.56
  -7  15   5   77.10   70.13
   7  15  -5   42.61   45.36
  -7 -15   5  100.53   34.84
  -7  15   4   48.15   45.26
   7  15  -4   48.01   31.54
  -7 -15   4    2.16   30.46
  -7  15   3  177.59   71.21
   7  15  -3   38.99   27.92
  -7 -15   3   -0.01   14.59
  -7  15   2 7966.63  451.82
  -7  15   2 6789.23  310.93
   7  15  -2 6724.43  313.58
   7  15  -2 6974.70  329.46
   7 -15  -2 6854.37  316.79
  -7 -15   2 9089.90  453.30
  -7  15   1 1223.83  241.94
  -7  15   1 1267.67  222.86
   7  15  -1 1222.07  217.25
   7  15  -1 1131.10  201.72
   7 -15  -1 1453.65  100.17
  -7 -15   1 1513.59  118.67
  -7  15   0 3762.33  349.33
   7  15   0 4716.70  229.99
   7  15   0 3961.42  196.37
  -7  15   0 4607.10  221.96
  -7 -15   0 4521.15  217.71
  -7  15  -1 1030.83  136.10
   7  15   1  784.36  121.87
  -7 -15  -1  894.41   94.85
   7 -15   1 1067.44  171.93
  -7  15  -2  197.53   71.28
   7  15   2  187.21   54.32
  -7  15  -2   58.69   27.19
   7 -15   2   71.43   32.47
  -7 -15  -2  204.89   51.89
  -7  15  -3  503.95   85.54
   7  15   3  228.65   64.01
  -7 -15  -3  300.31   69.67
   7 -15   3  480.62   98.60
  -7  15  -4 7320.17  592.05
   7  15   4 5944.55  477.03
  -7 -15  -4 6083.29  481.76
   7 -15   4 5821.64  469.46
  -7  15  -5   72.76   44.82
   7  15   5   88.92   53.51
  -7 -15  -5  229.40   42.03
   7 -15   5   96.07   58.86
  -7  15  -6 1406.32  104.96
   7  15   6 1679.10  195.37
  -7 -15  -6 1670.24  168.51
   7 -15   6 1842.69  245.86
  -7 -15  -7   57.93   22.36
   7 -15   7   61.98   54.47
   7  15   8  161.07   64.69
  -7 -15  -8   -7.52   34.50
   7 -15   8   59.36   72.19
   7  15   9  392.01  116.10
  -7 -15  -9  306.52  169.03
   7  17 -10   39.45   29.48
   7 -17 -10  105.40   44.08
   7  17  -9  187.21   79.34
   7 -17  -9  134.47   62.64
   7  17  -8   49.59   45.70
   7 -17  -8  105.47   48.59
   7  17  -7  267.12   51.26
   7 -17  -7   65.36   33.37
   7  17  -6  154.23   51.79
   7 -17  -6  108.52   35.30
   7  17  -5  341.90   78.87
   7  17  -5  249.69   56.21
   7 -17  -5  282.01   57.00
  -7 -17   5  184.53   43.01
  -7  17   4  -46.00   71.76
   7  17  -4   54.48   22.01
  -7 -17   4    3.81   11.60
  -7  17   3 4548.42  572.26
   7  17  -3 4528.81  320.80
   7  17  -3 4636.64  334.70
  -7 -17   3 4901.51  384.68
  -7  17   2  707.25  118.88
  -7  17   2  436.85   49.38
   7  17  -2  534.66   61.78
   7  17  -2  554.58  136.54
   7 -17  -2  515.04   78.53
  -7 -17   2  488.84   55.71
  -7  17   1  318.90  105.34
   7  17  -1  451.41   92.54
  -7  17   1  327.54   63.42
   7 -17  -1  508.98   57.83
  -7 -17   1  573.48   99.95
  -7  17   0  789.53  161.52
   7  17   0 1019.07  169.23
  -7  17   0  698.55  118.08
   7 -17   0  850.27  114.53
  -7 -17   0  736.06   78.91
  -7  17  -1  299.98   83.55
   7  17   1  500.04  105.22
  -7 -17  -1  637.66  118.09
   7 -17   1  497.71   66.56
  -7  17  -2   51.58   46.40
   7  17   2    0.49   24.06
  -7  17  -2   38.43   26.96
   7 -17   2   38.89   28.46
  -7 -17  -2  -11.52   22.08
  -7  17  -3  271.77   76.08
   7  17   3  403.35   78.74
  -7 -17  -3  536.37  116.54
   7 -17   3  481.41   83.92
  -7  17  -4  277.29   86.59
   7  17   4  337.17   62.92
  -7 -17  -4  278.11   77.04
   7 -17   4  251.19   78.07
  -7  17  -5  261.52   71.59
   7  17   5  223.19   61.22
  -7 -17  -5  256.48   53.56
   7 -17   5  275.86   54.33
  -7  17  -6  156.83   64.77
   7  17   6  139.60   53.52
  -7 -17  -6  183.43   52.46
   7 -17   6  116.47   61.36
  -7  17  -7   79.74   46.25
   7  17   7  148.16   63.65
  -7 -17  -7   80.73   43.60
   7 -17   7  150.34   64.77
   7  17   8   92.37   58.39
   7 -17   8   47.53   45.12
   7  17   9  112.70   53.16
  -7 -17  -9  152.71   80.04
   7 -17   9  119.38   67.04
   7  19  -9   36.50   29.60
   7 -19  -9  139.91   57.60
   7  19  -8 1017.88  147.73
   7 -19  -8  911.40  134.49
   7  19  -7  789.63  138.18
   7 -19  -7 1149.58  136.23
   7  19  -6  408.37   66.05
   7 -19  -6  284.75   51.67
   7  19  -5  726.88  160.14
   7  19  -5  554.84  102.45
   7 -19  -5 1077.87  158.99
  -7 -19   5  570.35   92.38
  -7  19   4  480.91  160.08
   7  19  -4  446.66   90.48
   7  19  -4  697.69  105.20
  -7 -19   4  378.87   78.42
  -7  19   3 2888.31  584.26
   7  19  -3 2929.41  232.87
   7  19  -3 2950.01  238.92
  -7 -19   3 3561.89  284.30
  -7  19   2 4262.59  559.99
   7  19  -2 3668.79  267.55
   7  19  -2 3344.86  239.52
  -7  19   2 3917.83  274.61
  -7 -19   2 3655.29  261.46
  -7  19   1 3705.47  454.63
   7  19  -1 2864.68  212.28
  -7 -19   1 3051.13  220.58
   7 -19  -1 2974.01  222.38
  -7  19   0 3171.07  282.08
   7  19   0 3059.73  244.18
  -7  19   0 2424.88  177.74
   7 -19   0 2714.49  199.53
  -7 -19   0 2800.14  204.44
  -7  19  -1  568.31  110.15
   7  19   1  501.49  117.73
  -7 -19  -1  604.43   73.69
   7 -19   1  489.15   67.64
  -7  19  -2  431.96  101.17
   7  19   2  245.70   65.97
  -7 -19  -2  311.47   69.53
   7 -19   2  403.01   95.41
  -7  19  -3  109.94   48.71
   7  19   3   73.59   31.03
  -7 -19  -3   38.09   15.10
   7 -19   3  -12.55   34.93
  -7  19  -4 1000.51  163.51
   7  19   4 1242.65  127.67
  -7 -19  -4 1104.14  217.78
   7 -19   4 1318.00  175.18
  -7  19  -5 5239.84  409.20
   7  19   5 5222.90  321.64
  -7 -19  -5 5273.55  316.00
   7 -19   5 5226.70  323.79
  -7  19  -6  519.49  107.17
   7  19   6  632.24  134.78
  -7 -19  -6  470.28   75.55
   7 -19   6  556.55   96.02
  -7 -19  -7   43.49   29.75
   7 -19   7   93.00   51.97
   7  19   8  244.10   65.94
  -7 -19  -8  135.00   77.66
   7 -19   8  175.15   54.69
   7  21  -9   95.60   34.21
   7 -21  -9   77.31   41.17
   7  21  -8  284.70   88.28
   7 -21  -8  297.75   69.63
   7  21  -7  373.02   78.69
   7 -21  -7  296.36   97.72
   7  21  -6  330.22  102.82
   7 -21  -6  566.21   70.60
   7  21  -5   97.19   29.30
  -7 -21   5   84.20   17.99
   7 -21  -5  184.08   56.93
   7  21  -4 3109.46  248.32
   7  21  -4 2781.03  213.44
   7 -21  -4 3036.28  242.88
  -7 -21   4 2126.39  198.11
  -7  21   3 2007.11  478.70
   7  21  -3 1977.62  140.16
   7  21  -3 2464.09  180.92
  -7 -21   3 2821.09  214.34
  -7  21   2   94.99   70.66
   7  21  -2  182.25   51.66
   7  21  -2  143.43   36.89
  -7  21   2   48.93   12.41
  -7 -21   2  174.65   41.44
  -7  21   1 3945.92  606.96
   7  21  -1 3659.25  293.45
  -7  21   1 3773.18  297.52
   7 -21  -1 3586.49  285.88
  -7 -21   1 3796.91  302.62
  -7  21   0   18.44   59.89
   7  21   0   67.58   25.66
  -7  21   0   94.94   34.55
   7 -21   0  124.05   34.30
  -7 -21   0  147.37   40.03
  -7  21  -1  506.54  133.16
   7  21   1  581.03  150.51
  -7  21  -1  193.11   79.85
   7 -21   1  555.63   97.59
  -7 -21  -1  625.68  120.15
  -7  21  -2 1906.01  359.45
   7  21   2 1966.17  222.23
  -7 -21  -2 2181.56  157.85
   7 -21   2 2205.24  250.18
  -7  21  -3  152.94   86.88
   7  21   3   75.08   39.69
  -7 -21  -3  130.86   48.36
   7 -21   3   89.73   45.21
  -7  21  -4   86.27   39.99
   7  21   4  115.84   46.11
  -7 -21  -4   56.37   25.15
   7 -21   4   60.94   31.43
  -7  21  -5 1444.28  300.40
   7  21   5 2141.07  234.34
  -7 -21  -5 1883.95  206.01
   7 -21   5 1408.78  229.30
   7  21   6   92.37   41.50
  -7 -21  -6   17.09   31.64
   7 -21   6   20.28   50.23
   7  21   7  147.54   55.35
   7 -21   7  271.86   90.12
   7  21   8  262.24  120.55
  -7 -21  -8  614.23  122.74
   7 -21   8  559.09  126.70
   7  23  -9  165.68   52.11
   7 -23  -9  160.54   69.35
   7  23  -8   94.34   47.98
   7 -23  -8   51.62   44.43
   7  23  -7 1259.84  214.26
   7 -23  -7 1423.93  129.00
   7  23  -6  228.36   66.13
   7 -23  -6  249.45   94.16
   7  23  -5   34.93   25.88
   7 -23  -5   98.68   39.50
   7  23  -4  236.84   64.94
  -7 -23   4   56.62   19.96
   7 -23  -4  253.34   70.42
  -7  23   3 2197.15  226.20
   7  23  -3 1636.86  131.32
   7  23  -3 1690.16  140.81
  -7 -23   3 2178.53  188.61
  -7  23   2  330.92  145.40
  -7  23   2  178.98   41.49
   7  23  -2  515.31  115.33
  -7 -23   2  600.75  109.24
  -7  23   1 1063.45  188.93
   7  23  -1  751.79  156.44
  -7 -23   1  884.01  119.85
  -7  23   0  870.48  255.12
   7  23   0  787.15  191.09
  -7  23   0  308.82  118.29
   7 -23   0  791.49  154.68
  -7 -23   0  999.38   91.03
   7  23   1   41.95   21.11
  -7  23  -1    7.04   13.30
   7 -23   1   69.41   21.58
  -7 -23  -1   43.39   15.54
  -7  23  -2   36.57   61.81
   7  23   2  116.28   60.56
  -7 -23  -2   67.80   31.20
   7 -23   2   80.37   40.70
  -7  23  -3  710.32  119.46
   7  23   3  632.10   74.01
  -7 -23  -3  753.79   78.64
   7 -23   3  636.94  118.62
  -7  23  -4  186.55   80.45
   7  23   4   91.83   62.20
  -7 -23  -4   68.92   28.15
   7 -23   4  138.79   69.06
  -7  23  -5   83.89   48.21
   7  23   5  341.26   88.79
  -7 -23  -5  289.76   74.25
   7 -23   5  360.58  120.62
   7  23   6   54.51   37.51
  -7 -23  -6  213.23   61.58
   7  23   7   -8.43   37.94
  -7 -23  -7   35.86   34.19
   7 -23   7   26.62   45.17
   7  25  -8  101.10   70.86
   7 -25  -8   82.63   48.40
   7  25  -7   76.43   31.14
   7 -25  -7  106.10   44.50
   7  25  -6  850.29  207.33
   7 -25  -6  567.58  164.78
   7  25  -5   80.05   41.96
   7 -25  -5  122.74   47.64
   7  25  -4  866.95  140.62
   7 -25  -4 1155.16  207.87
   7  25  -3 2548.00  162.30
  -7 -25   3 2973.21  181.71
   7 -25  -3 2614.15  167.47
  -7  25   2  847.14  131.82
   7  25  -2 1137.84  172.64
  -7 -25   2 1021.25   87.75
  -7  25   1  899.61  247.70
   7  25  -1  904.29  160.15
  -7 -25   1 1251.81  125.30
  -7  25   0  507.58  127.75
   7  25   0  160.01   44.92
  -7 -25   0  298.18   79.68
   7 -25   0  160.24   49.91
  -7  25  -1  495.66  110.14
   7  25   1  561.46  120.15
  -7 -25  -1  451.04  118.41
  -7  25  -2 3750.02  384.21
   7  25   2 3407.12  211.59
  -7 -25  -2 3328.99  204.56
   7 -25   2 3286.72  217.02
  -7  25  -3  836.84  205.74
   7  25   3 1007.89  122.79
  -7 -25  -3  959.26   99.71
   7 -25   3  600.72  172.67
  -7  25  -4   92.92   70.78
   7  25   4  125.53   55.31
  -7 -25  -4   21.54   19.34
   7 -25   4  171.17   75.29
   7  25   5  270.51   58.08
  -7 -25  -5  235.26   39.50
   7 -25   5  170.20   74.63
   7  25   6   83.39   34.40
  -7 -25  -6   43.46   29.00
   7 -25   6   85.79   28.88
   7  25   7  489.48  148.01
  -7 -25  -7  193.75   74.97
   7  27  -7   45.44   37.09
   7 -27  -7   91.54   45.77
   7  27  -6  422.78  151.08
   7 -27  -6  403.98   96.04
   7  27  -5  529.88   82.69
   7 -27  -5  339.63   71.01
   7  27  -4  170.61   48.22
   7 -27  -4  191.15   62.02
  -7 -27   3    4.80   11.78
   7 -27  -3   94.69   45.00
   7  27  -2   48.62   28.17
  -7 -27   2   81.07   37.53
   7 -27  -2   67.17   43.45
  -7  27   1  110.46   66.75
   7  27  -1   -9.59   22.64
  -7 -27   1   -4.67   14.79
  -7  27   0  490.85  122.62
   7  27   0  250.52   69.22
  -7 -27   0  370.03   42.47
  -7  27  -1 1359.75  249.73
   7  27   1 1579.08  207.74
  -7 -27  -1 1544.09  162.03
  -7  27  -2  104.92   49.42
  -7 -27  -2  179.76   39.73
   7 -27   2   70.39   33.09
   7  27   3   11.86   23.66
  -7 -27  -3   62.47   24.47
  -7  27  -4   64.53   54.39
   7  27   4  322.51   68.54
  -7 -27  -4  190.57   64.41
   7 -27   4  230.62   83.19
   7  27   5   72.91   65.57
  -7 -27  -5   91.87   46.11
   7 -27   5   54.11   45.43
   7  27   6   78.33   31.30
  -7 -27  -6  222.88   58.26
   7 -27   6  258.31   92.85
   7  29  -7   20.15   24.30
   7 -29  -7   75.19   44.22
   7  29  -6  171.99   52.35
   7 -29  -6  160.27   64.68
   7  29  -5  375.91   93.40
   7 -29  -5  151.62   79.61
   7  29  -4  278.73   70.50
   7 -29  -4  298.63   46.75
   7  29  -3  426.27   88.17
   7 -29  -3  208.41   54.51
   7  29  -2  175.75   49.58
  -7 -29   2  118.48   57.14
   7 -29  -2  159.09   52.48
   7  29  -1  382.63   89.87
  -7 -29   1  228.46   90.47
   7 -29  -1  476.46   82.98
  -7  29   0 1043.65  201.78
   7  29   0  868.01  139.92
  -7 -29   0  826.72  129.51
  -7  29  -1  -50.67   78.88
   7  29   1  134.82   51.79
  -7 -29  -1  227.55   54.23
   7  29   2  723.73  140.93
  -7 -29  -2  678.75  177.60
   7  29   3  555.96  127.64
   7 -29   3  456.03  129.63
   7  29   4   -2.29   38.14
  -7 -29  -4   30.99   29.19
   7 -29   4   72.13   25.84
   7  29   5   58.54   47.37
  -7 -29  -5   54.32   27.29
   7 -29   5   58.65   56.26
   7  31  -6  390.42  125.88
   7 -31  -6  321.37  147.62
   7  31  -5  941.80  183.85
   7 -31  -5  692.66  251.21
   7  31  -4   72.54   35.95
   7 -31  -4   22.18   27.70
   7  31  -3  417.82  117.95
   7 -31  -3  586.32  194.27
   7  31  -2   85.62   32.63
   7 -31  -2  196.21   38.73
   7  31  -1  997.00  141.23
  -7 -31   1  763.05  150.26
   7 -31  -1  898.52  135.73
   7  31   0 2768.59  254.25
  -7 -31   0 2974.93  198.28
   7 -31   0 2627.96  180.98
   7  31   1  750.57  248.59
   7  31   2   84.57   43.65
  -7 -31  -2   52.97   24.83
  -7  31  -3  105.21  103.61
   7  31   3  251.11   78.46
  -7 -31  -3  378.48   83.68
   7 -31   3  232.33   76.69
   7  31   4  672.96  208.22
   7  33  -4   65.60   29.59
   7 -33  -4   70.59   39.67
   7  33  -3  191.14   51.92
   7 -33  -3  244.18   69.55
   7  33  -2   63.67   32.37
   7 -33  -2   17.13   30.91
   7  33  -1  676.51  191.18
   7 -33  -1  753.41  146.81
   7  33   0   85.83   32.70
  -7 -33   0   50.64   22.98
   7 -33   0   93.90   47.62
   7  33   1   15.24   31.70
   7  33   2  232.31   88.69
   7  33   3   38.56   30.48
  -7 -33  -3  103.64   52.61
   7  35  -2   93.94   33.36
   7 -35  -2   88.34   40.37
   7  35  -1  426.81  105.67
   7 -35  -1  315.96  107.38
   7  35   0   70.88   46.73
   7 -35   0   86.82   39.39
   7  35   1  551.77  224.57
  -7 -35  -1  815.91  175.67
   7 -35   1 1072.33  231.95
   8   0 -10 1087.87   90.80
   8   0  -9   21.75   13.44
   8   0  -8 1155.41  109.23
   8   0  -8 1316.99   45.77
  -8   0   7   97.79   96.31
   8   0  -7   20.54   32.75
   8   0  -7   14.62   13.39
  -8   0   6 1259.91  284.56
   8   0  -6  714.00  185.63
   8   0  -6 1381.44  148.67
  -8   0   5   -5.71   38.65
   8   0  -5   49.63   24.98
   8   0  -5   21.22   13.34
  -8   0   4 4261.66  373.98
   8   0  -4 4695.66  230.62
   8   0  -4 4588.58  216.52
  -8   0   3   47.42   26.50
   8   0  -3   82.43   38.53
   8   0  -3   17.96   14.17
  -8   0   3    6.46   14.55
  -8   0   213660.88  470.69
   8   0  -2 9979.45  328.01
   8   0  -211329.12  366.24
  -8   0   211572.74  369.85
  -8   0   1   18.57   15.14
   8   0  -1   23.70    8.47
   8   0  -1  -10.14   18.14
  -8   0   1   49.47   24.62
  -8   0   0 1434.96  205.42
   8   0   0 1251.42  122.85
   8   0   0 1604.63  125.89
  -8   0   0 1248.09  127.61
  -8   0  -1   42.39   31.31
   8   0   1   11.27   26.76
  -8   0  -1   34.59   23.27
  -8   0  -2 3811.34  216.11
   8   0   2 2852.65  189.45
  -8   0  -3   16.34   22.35
   8   0   3   48.36   19.65
  -8   0  -4  265.01   69.05
   8   0   4  352.38   93.06
  -8   0  -5   26.46   19.67
   8   0   5   43.31   46.60
  -8   0  -6   44.62   23.29
   8   0   6   49.20   47.75
  -8   0  -7    8.93   20.44
   8   0   7   67.91   48.76
  -8   0  -8  385.59  166.65
   8   0   8  487.51  105.03
  -8   0  -9   24.15   15.87
   8   0   9   60.64   54.59
   8   2 -11   27.72   18.91
   8  -2 -11   12.22   15.46
   8   2  -9   85.63   39.60
   8   2  -9  114.16   30.42
   8  -2  -9   -5.57   15.27
   8   2  -8  -11.17   21.19
   8   2  -8   58.70   19.26
   8  -2  -8   68.19   19.07
   8  -2  -8    9.71    9.41
  -8   2   7 3520.99  463.82
   8   2  -7 3837.75  265.23
  -8  -2   7 4390.50  327.28
   8  -2  -7 3417.03  238.38
   8  -2  -7 4005.53  267.98
  -8   2   6 5433.80  570.82
   8   2  -6 5289.56  377.65
   8   2  -6 4768.66  344.74
  -8  -2   6 5324.75  487.43
   8  -2  -6 5455.65  385.95
   8  -2  -6 4871.60  351.24
  -8   2   5  -13.88   57.33
   8   2  -5    4.62   15.12
  -8  -2   5   -1.07   51.40
   8  -2  -5   25.86   14.70
  -8   2   4 2076.59  143.30
   8   2  -4 2354.59  123.37
  -8  -2   4 2598.55  344.62
   8  -2  -4 2411.83  117.76
  -8   2   3 1732.84   94.69
  -8   2   3 1839.38  315.77
   8   2  -3 1633.40   93.24
   8  -2  -3 1858.08  111.09
  -8  -2   3 2107.96  315.07
  -8  -2   3 1703.04   97.91
   8  -2  -3 1824.98  103.96
  -8   2   2 4609.12  195.13
   8   2  -2 3958.71  139.27
   8   2  -2 4311.68  151.84
  -8   2   2 4191.16  141.58
   8  -2  -2 4797.44  242.33
   8  -2  -2 3769.45  130.66
  -8  -2   2 4253.89  159.56
  -8   2   1 3316.00  120.01
  -8   2   1 2805.53  120.37
   8   2  -1 3593.35  149.17
   8   2  -1 3827.33  142.27
   8  -2  -1 3364.87  123.24
   8  -2  -1 3426.18  124.07
  -8  -2   1 3891.31  133.52
  -8  -2   1 3442.88  142.27
  -8   2   0 2612.67   94.28
  -8   2   0 2588.52  109.52
   8   2   0 2523.15  109.13
   8  -2   0 2691.65  100.27
  -8  -2   0 3220.44  125.61
  -8  -2   0 2663.59   96.29
   8  -2   0 3154.90  122.04
  -8   2  -1   28.14   21.86
   8   2   1   24.52   28.45
  -8   2  -1   19.48   18.59
  -8  -2  -1    4.53   23.82
   8  -2   1   27.32   17.66
  -8  -2  -1   70.64   29.84
  -8   2  -2 6805.69  360.40
   8   2   2 5878.24  333.60
  -8  -2  -2 5678.80  306.30
   8  -2   2 5525.64  297.42
  -8   2  -3  334.17   71.18
   8   2   3  198.53   53.15
  -8  -2  -3  207.17   41.05
   8  -2   3  466.03  104.69
   8   2   4 1662.01  338.55
  -8   2  -4 1456.21  165.03
   8  -2   4 1695.01  393.26
  -8  -2  -4 1466.87  183.49
  -8   2  -5  253.24   57.48
   8   2   5  178.49   79.97
  -8  -2  -5  256.07   60.76
   8  -2   5  209.16   65.20
  -8   2  -6 1202.58  137.27
   8   2   6 1328.36  188.81
  -8  -2  -6 1504.91  126.51
   8  -2   6 1404.91  142.23
  -8   2  -7   45.85   19.38
   8   2   7  151.20   70.96
  -8  -2  -7   58.36   37.19
   8  -2   7   38.46   45.05
  -8   2  -8  654.99  140.96
   8   2   8  582.67  137.62
  -8  -2  -8  423.09  175.08
   8  -2   8  676.41  179.46
   8   2   9  233.71   65.36
  -8   2  -9  129.95   33.83
   8  -2   9  151.66   74.87
  -8  -2  -9  103.68   46.74
   8   4 -11  254.35   66.51
   8  -4 -10 3021.03  260.32
   8   4  -9  120.82   37.00
   8  -4  -9   64.67   35.22
   8   4  -8 2233.21  207.99
   8   4  -8 2387.05  221.68
   8  -4  -8 2240.18  211.73
   8  -4  -8 2059.42  189.17
  -8   4   7  210.20   86.06
   8   4  -7  255.79   59.96
   8   4  -7  513.28   77.58
  -8  -4   7  255.91  117.24
   8  -4  -7  385.73   87.65
  -8   4   6 2811.46  386.05
   8   4  -6 2554.49  224.35
   8   4  -6 2445.85  212.11
   8  -4  -6 2475.27  200.83
  -8  -4   6 2816.60  308.50
   8  -4  -6 2780.14  219.32
  -8   4   5  966.61  191.74
   8   4  -5  800.85   96.58
   8   4  -5  515.17  121.93
   8  -4  -5  685.57  134.32
  -8  -4   5  939.53  196.08
   8  -4  -5  775.57   78.63
  -8   4   410814.23  540.11
   8   4  -4 9489.51  440.17
  -8  -4   4 9397.61  461.45
   8  -4  -410653.01  493.73
  -8   4   3  595.84  119.74
   8   4  -3  711.45   82.31
   8   4  -3  736.15   46.99
  -8   4   3  721.97   55.07
  -8  -4   3 1112.90  118.51
   8  -4  -3  800.85   50.18
  -8   4   2 3619.84  226.88
   8   4  -2 3262.59  208.02
   8   4  -2 3756.56  201.79
  -8   4   2 3423.17  185.81
  -8  -4   2 2881.13  161.85
   8  -4  -2 2942.09  156.51
  -8  -4   2 3326.16  180.62
  -8   4   1 4097.33  189.05
   8   4  -1 3467.71  127.13
   8   4  -1 3160.99  113.76
  -8   4   1 3025.37  105.20
  -8  -4   1 3529.63  135.78
  -8  -4   1 3424.62  119.37
   8  -4  -1 3495.04  127.71
  -8   4   0 5510.02  186.76
   8   4   0 5608.68  189.70
   8   4   0 5221.15  182.94
   8  -4   0 5636.63  199.07
  -8  -4   0 6312.49  228.83
  -8  -4   0 5378.99  179.75
  -8   4  -1  789.68  142.46
  -8   4  -1  936.48   91.95
   8   4   1 1114.71  204.06
   8  -4   1  942.22   91.19
  -8  -4  -1  748.80   52.44
  -8   4  -2 5732.30  307.81
   8   4   2 5689.17  307.11
  -8  -4  -2 5292.16  281.39
   8  -4   2 4783.76  256.37
  -8   4  -3  263.14   71.58
   8   4   3  222.89   66.28
  -8  -4  -3  219.52   51.28
   8  -4   3  376.90   71.79
  -8   4  -4 3199.78  246.76
   8   4   4 2327.00  201.82
  -8  -4  -4 2683.07  262.77
   8  -4   4 2610.18  220.54
  -8   4  -5  596.98  100.47
   8   4   5  668.51  181.12
  -8  -4  -5  466.38  108.84
   8  -4   5  651.20  183.71
  -8   4  -6  829.76  139.25
   8   4   6 1045.02  249.42
  -8  -4  -6  984.65  101.18
   8  -4   6 1107.77  125.32
  -8   4  -7  262.97   65.64
   8   4   7  303.31  106.14
  -8  -4  -7  436.14   63.14
   8  -4   7  547.33   83.25
   8   4   8 2099.11  320.64
  -8  -4  -8 2274.20  218.46
   8  -4   8 2168.40  243.38
   8   4   9 1179.78  215.23
  -8   4  -9  554.37  130.05
   8  -4   9  693.95  294.60
  -8  -4  -9  418.22  207.55
   8  -6 -11  155.42   51.35
   8   6 -10  294.34   97.22
   8  -6 -10  480.89  117.33
   8   6  -9  888.17  144.83
   8   6  -9  969.84  181.26
   8  -6  -9  629.72  204.21
   8   6  -8   76.87   25.84
   8   6  -8   47.20   19.10
   8  -6  -8   53.50   25.98
   8  -6  -8   44.89   15.48
   8   6  -7 1958.52  161.77
   8   6  -7 1620.34  204.19
   8  -6  -7 1720.52  139.30
  -8  -6   7 1311.36  237.65
  -8   6   6 1062.89  244.76
   8   6  -6 1394.98  164.05
   8   6  -6 1350.24  118.84
  -8  -6   6 1532.88  216.95
   8  -6  -6 1319.35  242.36
  -8   6   5 1092.90  190.11
   8   6  -5  497.49   98.10
   8   6  -5  701.97   88.26
  -8  -6   5  741.20  103.90
   8  -6  -5  602.79  129.36
   8  -6  -5  804.06   81.30
  -8   6   4 4143.45  242.30
   8   6  -4 3682.70  182.94
  -8  -6   4 3902.67  208.59
   8  -6  -4 3949.58  187.03
  -8   6   3 1738.46  284.84
  -8   6   3 1536.11   83.45
   8   6  -3 1624.26   96.78
   8  -6  -3 1366.66   76.84
  -8  -6   3 2489.78  220.25
  -8   6   2 2288.94  207.69
  -8   6   2 2109.20  113.53
   8   6  -2 2352.64  127.99
   8   6  -2 2219.10  168.44
   8  -6  -2 2168.68  121.60
  -8  -6   2 2006.53  119.60
  -8  -6   2 2206.08  140.87
  -8   6   1 3070.38  362.73
   8   6  -1 2631.26  146.73
   8   6  -1 2617.57  142.61
  -8   6   1 2386.85  126.12
  -8  -6   1 2566.94  146.01
  -8  -6   1 2429.96  131.14
   8  -6  -1 2395.89  132.47
  -8   6   0  300.33   55.73
  -8   6   0  375.77   64.48
   8   6   0  280.78   41.55
   8   6   0  236.61   44.36
   8  -6   0  209.47   27.85
  -8  -6   0  324.49   58.88
  -8  -6   0  136.18   21.26
  -8   6  -1 2579.47  148.68
   8   6   1 2721.59  153.67
  -8   6  -1 2767.52  158.82
   8  -6   1 2512.49  142.17
  -8  -6  -1 2744.86  150.43
  -8   6  -2   56.59   34.19
   8   6   2   -7.28   27.14
  -8  -6  -2   50.40   17.29
   8  -6   2   50.80   34.20
  -8   6  -3 2905.77  181.24
   8   6   3 3015.04  189.05
  -8  -6  -3 2153.82  135.36
   8  -6   3 2813.89  185.97
  -8   6  -4 4119.31  309.61
   8   6   4 3623.89  270.47
  -8  -6  -4 3509.68  257.72
   8  -6   4 3801.62  327.41
  -8   6  -5  412.68   75.15
   8   6   5  270.00   61.68
  -8  -6  -5  378.55   64.25
   8  -6   5  322.05   90.88
  -8   6  -6   10.29   15.44
   8   6   6  -20.35   38.03
  -8  -6  -6   38.90   24.05
   8  -6   6  147.74   69.24
  -8   6  -7 1614.66  351.68
   8   6   7 1427.56  230.87
  -8  -6  -7 1706.16  180.11
   8  -6   7 1584.81  296.67
  -8   6  -8   87.38   51.14
   8   6   8   60.43   46.54
  -8  -6  -8   12.01   18.78
  -8   6  -9  225.20   53.72
   8   6   9  189.63   66.21
  -8  -6  -9  509.68  105.46
   8  -6   9  451.17  126.72
   8   8 -11   39.38   26.69
   8   8 -10   48.65   23.75
   8  -8 -10   36.45   33.75
   8   8  -9  178.76   72.65
   8   8  -9  274.73   75.24
   8  -8  -9  201.20   59.51
   8   8  -8 1045.53   94.98
   8  -8  -8 1044.39  114.53
   8   8  -7  245.72   77.61
   8   8  -7  254.92   67.86
  -8  -8   7  277.31   88.11
   8  -8  -7   73.61   37.55
   8  -8  -7  316.71   57.41
   8  -8  -7  349.16   58.06
  -8   8   6  825.97  234.40
   8   8  -6  674.04  124.89
   8   8  -6 1011.10  161.47
  -8  -8   6 1189.70  222.07
   8  -8  -6  842.75  122.44
   8  -8  -6 1059.56  150.21
  -8   8   5  192.57   75.03
   8   8  -5    9.21   20.51
   8  -8  -5   43.71   18.43
   8  -8  -5    9.74    8.98
  -8  -8   5   16.37   29.35
  -8   8   4 1994.10  227.86
   8   8  -4 1759.79  133.60
   8   8  -4 1846.77  118.78
  -8  -8   4 2477.74  228.54
   8  -8  -4 1786.34  109.30
   8  -8  -4 1606.72  326.80
  -8   8   3 2411.55  245.44
   8   8  -3 2424.81  124.42
   8   8  -3 2483.60  133.14
  -8   8   3 2366.25  113.21
   8  -8  -3 2498.98  122.50
  -8  -8   3 2151.87  165.11
  -8   8   2 1894.45  256.03
  -8   8   2 2454.55  133.17
   8   8  -2 2533.10  137.02
   8   8  -2 2321.15  130.72
   8  -8  -2 2222.29  121.96
  -8  -8   2 2229.38  129.22
  -8   8   1 1480.40  185.99
  -8   8   1 1010.75   69.73
   8   8  -1 1421.05  176.94
   8  -8  -1 1037.27   66.89
  -8  -8   1 1474.31  145.43
  -8   8   0   23.46   53.77
  -8   8   0   24.77   17.98
   8   8   0   13.26    8.66
   8   8   0   48.09   27.61
   8  -8   0   32.93   29.09
  -8  -8   0    5.78   20.14
  -8   8  -1   36.80   33.83
   8   8   1   51.89   22.12
  -8   8  -1    2.22   16.57
   8  -8   1   -1.89   30.24
  -8  -8  -1   60.02   17.96
  -8   8  -2   58.13   31.49
   8   8   2   44.77   29.14
  -8  -8  -2   80.59   22.12
   8  -8   2   84.56   26.70
  -8   8  -3 2007.84  214.63
   8   8   3 2009.31  155.71
  -8  -8  -3 2053.49  158.64
   8  -8   3 2095.50  165.17
  -8   8  -4 2125.40  254.54
   8   8   4 1772.24  324.53
  -8  -8  -4 2210.53  169.03
   8  -8   4 1668.17  307.03
  -8   8  -5   41.16   38.66
   8   8   5  161.11   63.71
  -8  -8  -5   17.14   30.89
   8  -8   5   53.01   47.94
  -8   8  -6   37.92   34.68
   8   8   6   43.18   38.37
  -8  -8  -6   76.66   32.27
   8  -8   6    4.43   44.40
  -8   8  -7  141.59   48.17
   8   8   7  151.08   55.64
  -8  -8  -7   97.13   29.98
   8  -8   7  168.42   56.98
  -8   8  -8   57.95   45.01
   8   8   8   21.61   52.02
  -8  -8  -8   20.82   23.46
   8  -8   8  109.87   40.13
  -8   8  -9  362.68   80.20
   8   8   9  566.26  170.78
  -8  -8  -9  220.69   84.38
   8  -8   9  273.22  111.70
   8  10 -10   14.32   23.87
   8 -10 -10   52.29   35.06
   8  10  -9   33.21   38.31
   8 -10  -9   68.03   29.36
   8  10  -8 1485.09   94.31
   8  10  -8 1421.21  116.73
   8 -10  -8 1550.89  118.78
   8  10  -7   33.86   13.54
   8  10  -7   80.79   28.40
  -8 -10   7   94.31   30.45
   8 -10  -7  123.02   39.09
   8 -10  -7   20.44    9.23
  -8  10   6 1043.65  340.11
   8  10  -6 1323.30  102.30
   8  10  -6 1150.66  112.10
   8 -10  -6  987.20  129.06
  -8 -10   6 1777.12  261.71
  -8  10   5  850.62  153.81
   8  10  -5  932.46  107.64
   8  10  -5 1007.20  117.55
  -8 -10   5 1073.86  177.37
   8 -10  -5 1002.08  107.71
   8 -10  -5  955.19  104.67
  -8  10   4  843.87  184.33
   8  10  -4  472.22   88.02
   8  10  -4  436.98   64.86
   8 -10  -4  336.60   68.28
  -8 -10   4  563.85   79.87
  -8  10   3 2203.89  160.20
   8  10  -3 2235.63  117.69
  -8 -10   3 1993.65  190.29
   8 -10  -3 2087.67  102.88
  -8  10   2 1108.39  176.92
  -8  10   2 1357.31   78.48
   8  10  -2 1486.46  124.22
   8  10  -2 1512.93  156.32
   8 -10  -2 1448.04   85.74
  -8 -10   2 1463.57   88.43
  -8  10   1  100.60   78.52
   8  10  -1   36.79   24.22
   8  10  -1    4.18   14.22
  -8  10   1   75.36   16.58
   8 -10  -1   68.95   28.65
  -8 -10   1   36.02   22.05
  -8  10   015392.46 2689.92
  -8  10   014072.03  646.74
   8  10   013958.73  647.27
   8 -10   014719.87 2566.37
  -8 -10   013372.99  618.38
  -8  10  -1    7.81   60.28
  -8  10  -1   42.78   22.22
   8  10   1   94.65   42.50
   8 -10   1   33.44   32.59
  -8 -10  -1   65.31   20.26
  -8  10  -2 1185.54  176.54
   8  10   2 1052.57  112.20
  -8 -10  -2 1740.25  112.97
   8 -10   2 1647.28  231.01
  -8  10  -3 1814.70  331.90
   8  10   3 2150.93  173.01
  -8 -10  -3 2346.42  174.93
   8 -10   3 2537.64  217.55
  -8  10  -4  771.49  121.72
   8  10   4  895.50  138.28
  -8 -10  -4 1013.98  154.72
   8 -10   4  848.53  137.59
   8  10   5   68.98   36.83
  -8 -10  -5   33.06   17.32
   8 -10   5   20.66   32.94
  -8  10  -6 2841.53  312.98
   8  10   6 2298.70  286.95
  -8 -10  -6 2873.91  269.32
   8 -10   6 2351.31  233.46
  -8  10  -7  929.09  232.29
   8  10   7 1266.46  154.25
  -8 -10  -7 1231.12  135.37
   8 -10   7 1021.50  213.68
  -8  10  -8  586.79  195.68
   8  10   8 1019.08  164.90
  -8 -10  -8  812.54  125.26
   8 -10   8  940.59  275.92
  -8  10  -9  302.72  183.98
   8  10   9  650.21  157.81
  -8 -10  -9  240.69  182.47
   8 -10   9  411.74  198.70
   8  12 -10  403.73  169.96
   8 -12 -10  817.51  148.32
   8  12  -9  582.78  159.29
   8  12  -8 1483.18  159.40
   8 -12  -8 1604.48  183.88
   8  12  -7 1666.42  200.99
  -8 -12   7 1104.38  264.94
   8 -12  -7 1953.33  190.67
  -8  12   6  232.00   94.52
   8  12  -6  481.54   67.42
   8  12  -6  429.73   75.24
  -8  12   5 3616.25  371.76
   8  12  -5 3629.75  286.40
   8  12  -5 3637.85  292.38
  -8 -12   5 3165.64  287.76
  -8  12   4 1333.24  251.27
   8  12  -4 1276.86  142.19
   8  12  -4 1180.12  163.03
   8 -12  -4 1260.35  132.50
  -8 -12   4 1625.37  223.94
  -8  12   3  506.95  110.72
   8  12  -3  220.38   56.10
   8  12  -3  202.39   47.21
   8 -12  -3  209.43   53.51
  -8 -12   3  180.96   42.16
  -8  12   2 2806.77  347.49
  -8  12   2 3861.19  218.91
   8  12  -2 3729.64  215.93
   8  12  -2 3710.84  218.93
   8 -12  -2 3846.08  223.74
  -8 -12   2 4049.43  240.10
  -8  12   1 5087.05  274.69
   8  12  -1 6578.83  314.41
   8  12  -1 4968.95  235.95
  -8  12   1 5711.44  267.69
   8 -12  -1 5682.04  279.66
  -8 -12   1 5172.26  246.58
  -8  12   0 3732.27  213.32
  -8  12   0 3474.74  173.74
   8  12   0 3951.96  206.56
   8 -12   0 3411.74  172.66
  -8 -12   0 3628.89  182.89
  -8  12  -1 5892.91  384.03
  -8  12  -1 4918.26  283.41
   8  12   1 4772.64  282.33
   8 -12   1 5680.00  344.97
  -8 -12  -1 5472.09  318.17
  -8  12  -2 3549.03  242.15
   8  12   2 2411.24  158.95
  -8 -12  -2 3011.53  182.86
   8 -12   2 2620.31  164.37
  -8  12  -3 1349.97  280.51
   8  12   3 1788.66  327.71
  -8 -12  -3 1693.66  307.00
   8 -12   3 1555.68  176.25
   8  12   4 1341.91  110.49
  -8 -12  -4 1308.25  119.84
   8 -12   4 1160.14  218.37
  -8  12  -5  640.78  140.12
   8  12   5  861.20  198.76
  -8 -12  -5  982.05  114.76
   8 -12   5  883.36  136.06
  -8  12  -6 1093.61  173.69
   8  12   6 1349.89  230.67
  -8 -12  -6 1294.12  148.14
   8 -12   6 1279.48   86.52
   8  12   7  242.72   84.69
  -8 -12  -7  252.59   96.77
   8 -12   7  188.36   70.40
  -8  12  -8  876.57  304.68
   8  12   8 1498.76  338.13
  -8 -12  -8 1900.46  191.97
   8 -12   8 1254.61  392.24
  -8  12  -9  183.47   78.04
   8  12   9  470.20  192.30
  -8 -12  -9  668.32  124.00
   8 -12   9  734.41  176.82
   8  14 -10  136.92   43.25
   8 -14 -10  204.13   71.03
   8  14  -9   -2.72   18.41
   8 -14  -9   55.09   28.88
   8  14  -8  135.07   44.80
   8 -14  -8  187.96   52.43
   8  14  -7 1264.99  209.04
   8 -14  -7 1376.19  233.88
   8  14  -6 1323.07  109.67
   8  14  -6 1397.30  210.83
  -8 -14   6 1243.96  171.38
  -8  14   5  725.55  224.33
   8  14  -5  946.95  167.01
   8  14  -5 1245.08  106.26
  -8 -14   5 1006.27  145.77
  -8  14   4 2786.32  391.75
   8  14  -4 2505.58  199.70
   8  14  -4 2493.50  214.56
  -8 -14   4 3352.37  359.84
  -8  14   3  217.06   71.41
   8  14  -3   70.67   34.07
  -8 -14   3   47.76   24.57
   8 -14  -3  104.06   24.56
  -8  14   2  785.98  124.65
   8  14  -2  626.39   72.30
  -8  14   2  586.77   68.91
   8 -14  -2  628.30   67.20
  -8 -14   2  637.79   74.57
  -8  14   1  639.16   89.75
   8  14  -1  941.39  152.88
  -8  14   1 1053.72  105.05
   8 -14  -1 1029.02  134.16
  -8 -14   1  919.43  121.93
  -8  14   0 2555.17  445.44
  -8  14   0 2401.99  142.10
   8  14   0 2888.30  201.01
   8 -14   0 2625.20  160.27
  -8 -14   0 2737.56  164.65
  -8  14  -1  147.04   66.59
   8  14   1  363.31   69.98
  -8  14  -1  233.94   61.10
   8 -14   1  420.60   96.43
  -8 -14  -1  297.62   79.63
  -8  14  -2  191.26  100.56
   8  14   2   -7.85   21.66
  -8 -14  -2  136.71   41.21
   8 -14   2   81.64   51.62
  -8  14  -3  -10.99   62.55
   8  14   3   61.15   32.41
  -8 -14  -3   45.78   27.13
   8 -14   3   22.17   41.20
  -8  14  -4  195.37   70.60
   8  14   4   88.96   57.31
  -8 -14  -4   14.81   27.23
   8 -14   4   19.29   32.21
  -8  14  -5 1389.79  141.09
   8  14   5 1280.13  251.60
  -8 -14  -5 1590.82  156.90
   8 -14   5 1431.91  155.47
  -8  14  -6   14.83   22.65
   8  14   6   65.49   38.53
  -8 -14  -6   46.37   23.80
   8 -14   6   76.83   51.56
  -8  14  -7  647.24  175.66
   8  14   7  971.76  262.47
  -8 -14  -7 1015.33  209.96
   8 -14   7  634.02  225.89
   8  14   8  297.38   74.93
  -8 -14  -8  327.28   87.38
   8 -14   8  306.44   89.69
   8  16  -9  135.05   48.06
   8 -16  -9   71.36   36.10
   8  16  -8  895.64  168.79
   8 -16  -8 1162.18  123.95
   8  16  -7   96.07   34.17
   8 -16  -7   81.21   29.47
   8  16  -6   53.64   29.49
  -8 -16   6   90.92   26.42
   8 -16  -6   44.37   30.68
  -8  16   5  371.18  119.96
   8  16  -5  246.81   48.72
   8  16  -5  499.44   83.67
  -8 -16   5  233.22   46.86
  -8  16   4 1884.31  372.10
   8  16  -4 1745.25  150.12
  -8 -16   4 1426.71  169.68
  -8  16   3  197.46   66.39
   8  16  -3    3.81   10.27
   8  16  -3   48.63   24.39
  -8 -16   3   19.35   17.94
  -8  16   2  453.92  105.40
   8  16  -2  544.32  142.04
   8  16  -2  402.23   84.91
  -8  16   2  487.40   60.94
   8 -16  -2  570.77   93.02
  -8 -16   2  899.73  120.43
  -8  16   1  154.74   77.38
   8  16  -1   30.10   14.25
  -8  16   1   18.41   13.17
   8 -16  -1   38.09   24.59
  -8 -16   1   -4.79   13.31
  -8  16   0   81.63   39.69
   8  16   0  104.53   36.66
  -8 -16   0   46.04   17.90
   8 -16   0   96.25   34.20
  -8  16  -1   83.60   59.00
   8  16   1  159.78   52.41
  -8  16  -1  135.16   40.09
   8 -16   1  199.63   59.60
  -8 -16  -1  122.88   35.32
  -8  16  -2 3716.90  321.92
   8  16   2 3204.35  261.33
  -8 -16  -2 3666.50  298.48
   8 -16   2 3800.14  310.07
  -8  16  -3   88.91   66.42
   8  16   3   36.68   28.34
  -8 -16  -3   64.05   29.80
   8 -16   3  110.16   38.40
  -8  16  -4  737.19  143.66
   8  16   4  473.17   88.66
  -8 -16  -4  435.11  103.52
   8 -16   4  520.55  107.66
  -8  16  -5  201.96   86.64
   8  16   5  233.90   59.12
  -8 -16  -5  136.55   46.61
   8 -16   5  247.46   54.72
  -8  16  -6  377.87   97.57
   8  16   6  386.57   81.52
  -8 -16  -6  309.29   53.72
   8 -16   6  319.87   90.11
  -8  16  -7   19.55   16.16
   8  16   7   61.86   45.84
  -8 -16  -7   58.31   41.27
   8 -16   7   44.64   50.52
  -8  16  -8   58.53   41.98
   8  16   8  207.12   71.84
  -8 -16  -8  220.82   47.30
   8 -16   8  117.40   47.32
   8  18  -9  984.81  174.63
   8 -18  -9 1059.90  187.64
   8  18  -8  514.56  137.93
   8 -18  -8  300.58  110.50
   8  18  -7  508.95   73.22
   8 -18  -7  425.31   97.92
   8  18  -6 2607.28  164.26
   8 -18  -6 2644.05  171.48
  -8  18   5   20.37   90.07
   8  18  -5  104.29   37.00
  -8 -18   5   -6.20   20.20
  -8  18   4  635.90  236.43
   8  18  -4 1042.55  152.54
  -8 -18   4  632.13   91.90
  -8  18   3 1509.13  237.23
   8  18  -3 1450.66  115.95
  -8 -18   3 1270.47  133.17
  -8  18   2 2419.49  392.91
   8  18  -2 2460.08  204.36
   8  18  -2 2226.52  180.36
  -8  18   2 2252.07  179.66
   8 -18  -2 2447.98  195.29
  -8 -18   2 3264.08  263.33
  -8  18   1  178.56   95.34
   8  18  -1   45.97   23.73
  -8  18   1   22.27   15.60
   8 -18  -1   62.24   27.29
  -8 -18   1   19.16   11.52
  -8  18   0 4934.66  422.75
   8  18   0 4647.99  371.35
  -8  18   0 4538.54  359.85
   8 -18   0 4343.59  347.18
  -8 -18   0 4228.36  336.27
  -8  18  -1 6006.37  589.05
   8  18   1 6885.17  544.51
  -8 -18  -1 6873.46  541.14
   8 -18   1 6858.20  543.32
  -8  18  -2  866.16  198.49
   8  18   2 1297.09  109.39
  -8 -18  -2 1254.89  207.24
   8 -18   2 1039.41   95.58
  -8  18  -3  917.34  173.41
   8  18   3  946.05   72.60
  -8 -18  -3 1200.05  107.39
   8 -18   3 1167.09  111.21
  -8  18  -4  196.70   68.46
   8  18   4   83.80   44.04
  -8 -18  -4  109.12   31.83
  -8  18  -5  643.94  148.63
   8  18   5  541.24  102.00
  -8 -18  -5  479.97  128.19
   8 -18   5  725.00   91.18
  -8  18  -6 1777.95  198.19
   8  18   6 1539.40  188.15
  -8 -18  -6 1891.73  187.29
   8 -18   6 1518.32  172.34
  -8  18  -7 1005.88  183.83
   8  18   7 1061.19  216.31
  -8 -18  -7 1136.69  109.73
   8 -18   7 1324.47  141.30
   8  18   8  161.58   64.13
  -8 -18  -8  156.76   55.87
   8 -18   8  230.35   74.53
   8  20  -9  196.83   54.15
   8 -20  -9  166.26   48.44
   8  20  -8  499.54  134.05
   8 -20  -8  387.20  132.48
   8  20  -7  274.89   86.54
   8 -20  -7  352.87  101.28
   8  20  -6   12.46   24.65
   8 -20  -6   55.66   24.80
   8  20  -5  480.84   44.40
  -8 -20   5  313.99   45.30
   8 -20  -5  389.11   47.84
  -8  20   4 7632.97  247.60
   8  20  -4 6440.95  581.78
   8  20  -4 7449.24  109.47
  -8 -20   4 5904.00  543.42
  -8  20   3   98.62   78.04
   8  20  -3  103.55   30.02
   8  20  -3  110.95   45.61
  -8 -20   3  101.68   35.89
  -8  20   2  636.28  146.97
   8  20  -2  604.42  123.06
   8  20  -2  289.66   70.66
  -8  20   2  436.59   63.84
   8 -20  -2  126.48   35.65
  -8 -20   2  500.49   83.75
  -8  20   1  323.33  117.58
  -8  20   1  141.48   48.56
   8  20  -1  387.25   62.08
  -8 -20   1  398.35   86.57
  -8  20   0   86.38   70.25
   8  20   0   33.77   22.99
  -8 -20   0   20.65   12.87
  -8  20  -1  305.99  117.38
   8  20   1  373.42   91.44
  -8 -20  -1  397.07   82.59
   8 -20   1  476.60   77.75
  -8  20  -2 3953.42  336.19
   8  20   2 3841.93  303.43
  -8 -20  -2 4463.59  358.87
   8 -20   2 4017.01  374.62
  -8  20  -3  286.65   69.92
   8  20   3   65.07   34.37
  -8 -20  -3  189.87   64.00
   8 -20   3   79.90   32.69
  -8  20  -4 3855.13  265.89
   8  20   4 3597.92  234.88
  -8 -20  -4 3849.95  236.41
   8 -20   4 3366.26  285.82
  -8 -20  -5   43.78   18.40
   8 -20   5  182.99   74.04
   8  20   6   99.95   51.44
  -8 -20  -6  184.92   61.04
   8 -20   6  356.70   88.34
  -8  20  -7   66.64   47.09
   8  20   7   29.54   29.41
  -8 -20  -7   26.32   29.32
   8 -20   7  117.28   52.04
   8  22  -8   26.00   21.67
   8 -22  -8   67.71   37.07
   8  22  -7   54.15   31.01
   8 -22  -7   59.59   39.27
   8  22  -6  375.52  146.00
   8 -22  -6  721.13  123.06
   8  22  -5  114.55   35.58
   8 -22  -5   72.66   22.10
  -8  22   4  260.29  123.53
   8  22  -4   96.55   36.76
  -8 -22   4   26.42   21.67
  -8  22   3 3228.28  619.65
   8  22  -3 3180.83  312.24
  -8 -22   3 4239.44  388.73
  -8  22   2   84.96   56.44
   8  22  -2   61.43   39.63
  -8 -22   2   79.13   34.45
  -8  22   1  879.47  231.80
   8  22  -1  989.53   61.32
  -8 -22   1  956.93   75.85
   8 -22  -1  743.37  150.68
  -8  22   0  393.12  136.04
   8  22   0  301.68   81.88
  -8  22   0  123.32   46.55
   8 -22   0  304.75   74.04
  -8 -22   0  321.09   52.99
  -8  22  -1   82.00   67.00
   8  22   1   28.05   27.30
  -8 -22  -1   55.52   26.12
   8 -22   1   41.25   16.57
   8  22   2   41.95   32.76
  -8 -22  -2   28.26   26.56
   8 -22   2   36.31   28.57
  -8  22  -3 3590.94  249.80
   8  22   3 3589.78  258.61
  -8 -22  -3 4454.02  270.33
   8 -22   3 3637.18  375.18
  -8  22  -4  727.15  217.22
   8  22   4  653.40  159.98
  -8 -22  -4 1017.18  117.61
   8 -22   4  896.99  106.49
   8  22   5   58.18   40.91
  -8 -22  -5   48.65   22.56
   8 -22   5  176.49   71.25
   8  22   6   91.69   53.97
  -8 -22  -6   84.49   36.85
   8 -22   6   76.56   42.96
   8  22   7  291.79   93.51
  -8 -22  -7  202.77   57.78
   8 -22   7  162.47   63.26
   8  24  -8  369.78  136.90
   8 -24  -8  836.98  156.13
   8  24  -7  151.50   49.18
   8 -24  -7  199.70   64.82
   8  24  -6 1044.20  223.42
   8 -24  -6 1103.82  159.54
   8  24  -5 1488.04  222.60
   8 -24  -5 2022.10  208.98
   8  24  -4 2255.88  234.03
  -8 -24   4 1697.99  208.30
  -8  24   3  120.91   62.38
   8  24  -3   15.87   24.86
  -8 -24   3   64.59   24.55
  -8  24   2  957.03  206.94
   8  24  -2  796.66  135.57
  -8 -24   2  975.09   66.61
  -8  24   1 1695.80  373.90
   8  24  -1 1946.28  186.77
  -8 -24   1 2023.89  205.30
   8 -24  -1 1874.66  176.63
  -8  24   0 1019.72  277.95
   8  24   0 1502.80  153.04
  -8  24  -1  161.50   79.00
   8  24   1  165.25   41.20
  -8 -24  -1  -15.11   19.11
   8 -24   1   60.54   42.87
  -8  24  -2  479.47  135.36
   8  24   2  333.56  119.28
  -8 -24  -2  448.70  111.60
   8 -24   2  468.59  102.25
  -8  24  -3  260.56   83.62
   8  24   3  518.44   72.92
  -8 -24  -3  277.43   83.93
   8 -24   3  272.65   99.14
  -8  24  -4 2927.15  330.62
   8  24   4 2443.69  238.84
  -8 -24  -4 2750.81  259.74
   8 -24   4 2345.79  341.16
   8  24   5  619.31  193.04
  -8 -24  -5  669.95  159.29
   8 -24   5  755.54  227.87
  -8  24  -6  952.49  188.63
   8  24   6 1112.85  312.54
  -8 -24  -6 1381.46  238.61
   8 -24   6 1453.61  259.61
   8  26  -7   65.55   31.23
   8 -26  -7   49.91   36.51
   8  26  -6  274.47   96.27
   8 -26  -6  277.33   89.01
   8  26  -5   36.83   28.39
   8  26  -4   57.06   31.15
   8 -26  -4   33.38   27.41
   8  26  -3   87.46   19.41
  -8 -26   3   63.53   27.94
  -8  26   2  720.14  269.03
   8  26  -2 1248.79  141.51
  -8  26   1   88.57   51.35
   8  26  -1   65.28   29.53
  -8 -26   1   14.63   11.24
  -8  26   0 2557.88  500.30
   8  26   0 2913.61  309.34
  -8 -26   0 2584.55  264.10
  -8  26  -1  150.42   85.81
   8  26   1   33.86   31.05
   8 -26   1   55.35   34.17
  -8  26  -2    1.93   55.92
   8  26   2  127.99   55.57
  -8 -26  -2  218.06   71.79
   8 -26   2   87.00   51.32
   8  26   3   45.95   36.51
  -8 -26  -3   53.77   19.15
   8 -26   3   43.66   41.23
   8  26   4 1739.20  143.93
  -8 -26  -4 1149.61  157.12
   8 -26   4  968.43  235.27
  -8  26  -5  128.80   66.22
   8  26   5   14.88   35.58
  -8 -26  -5   62.24   50.53
   8 -26   5   69.66   29.70
   8  26   6  573.75  186.83
  -8 -26  -6  417.02  164.78
   8  28  -6   77.44   33.10
   8 -28  -6   70.05   48.41
   8  28  -5  633.70  170.59
   8 -28  -5  501.72  212.75
   8  28  -4  576.95   93.31
   8 -28  -4  486.58  124.66
   8 -28  -3 1103.65  151.31
   8  28  -2   17.10   24.21
  -8 -28   2   -1.91   13.88
  -8  28   1 4266.96  496.18
   8  28  -1 3650.10  336.44
  -8 -28   1 3872.13  350.63
  -8  28   0   94.30   52.22
   8  28   0   -1.01   30.06
  -8  28  -1 3348.22  562.52
   8  28   1 3447.71  319.70
  -8 -28  -1 3641.47  332.53
  -8  28  -2  257.40  101.68
   8  28   2   60.58   33.12
  -8 -28  -2  159.19   62.00
   8 -28   2  103.61   44.66
  -8  28  -3  159.16   81.16
  -8 -28  -3  147.60   43.89
   8 -28   3   24.86   34.68
   8  28   4   83.12   57.95
  -8 -28  -4  166.81   47.17
   8 -28   4  111.20   61.01
   8  28   5 1827.96  396.31
  -8 -28  -5 1937.85  323.72
   8 -28   5 1851.18  321.24
   8  30  -5  662.53  129.46
   8 -30  -5  685.73  136.28
   8  30  -4 1547.43  332.32
   8 -30  -4 1851.09  317.76
   8  30  -3   83.45   25.94
   8 -30  -3  182.25   52.11
   8  30  -2  191.74   63.92
   8 -30  -2  231.93   65.20
   8  30  -1   24.63   26.30
  -8  30   0   71.73   46.36
   8  30   0   57.62   42.41
  -8 -30   0   81.95   40.92
  -8  30  -1   53.29   79.73
   8  30   1   34.86   33.63
  -8 -30  -1   30.21   25.53
  -8  30  -2  643.61  368.73
   8  30   2 1094.99  229.56
  -8 -30  -2 1691.20  152.88
   8 -30   2  764.89  260.30
  -8  30  -3  152.33   61.44
   8  30   3  152.09   49.19
   8 -30   3  157.41   43.61
   8  30   4   76.24   39.30
  -8 -30  -4  142.35   52.16
   8  32  -4  111.34   43.79
   8 -32  -4   12.77   41.96
   8  32  -3  761.98  141.84
   8 -32  -3  567.79  234.85
   8  32  -2  104.58   49.07
   8 -32  -2  244.89   60.06
   8  32  -1  643.74  124.70
   8 -32  -1  492.24  156.33
   8  32   0   77.77   47.08
   8 -32   0  -16.95   30.83
  -8  32  -1  177.22  109.57
   8  32   1   23.53   27.30
  -8 -32  -1  -13.13   22.22
  -8  32  -2  435.90  245.19
   8  32   2 1618.46  276.07
  -8 -32  -2 2011.58  335.36
  -8  32  -3   43.41   82.01
   8  32   3  160.03   53.27
   8 -32   3  102.72   52.90
   8  34  -2   46.02   34.21
   8 -34  -2  105.49   49.05
   8  34  -1  265.41  146.96
   8  34   0   91.31   36.86
   8  34   1 1358.02  310.73
  -8 -34  -1 1944.42  323.22
   8 -34   1 1994.28  332.70
   9   1  -9   37.59   22.33
   9  -1  -9    4.02   13.91
   9   1  -8   14.17   21.50
   9  -1  -8   46.73   22.71
  -9   1   7  997.43  209.76
   9   1  -7 1283.55  104.49
  -9  -1   7 1245.37  258.98
   9  -1  -7  978.04   41.03
  -9   1   6 2854.30  394.53
   9   1  -6 2443.77  169.67
  -9  -1   6 2309.66  440.08
   9  -1  -6 2505.17  171.70
  -9   1   5  649.27  106.71
   9   1  -5  484.57   57.26
   9   1  -5  324.84   75.56
  -9  -1   5  748.87  142.65
   9  -1  -5  545.69  103.72
   9  -1  -5  303.91   72.02
   9   1  -4  352.73   63.17
  -9   1   4  292.08   78.26
   9  -1  -4  343.16   79.74
  -9  -1   4  450.41   97.26
  -9   1   3   57.49   26.08
   9   1  -3   71.76   24.43
  -9   1   3   57.05   18.23
  -9  -1   3   39.65   47.71
   9  -1  -3  126.44   38.04
  -9  -1   3   49.50   15.38
  -9   1   2 3045.57  178.20
  -9   1   2 2781.91  136.88
   9   1  -2 2735.08  138.42
   9  -1  -2 2498.98  127.32
  -9  -1   2 3487.14  200.76
  -9  -1   2 2680.72  130.95
  -9   1   1 1065.92  160.87
   9   1  -1 1091.66  157.45
  -9   1   1 1178.93  208.26
  -9  -1   1 1074.98  227.52
   9  -1  -1 1026.94  149.52
  -9   1   0 2651.17  143.37
   9   1   0 3566.02  182.36
  -9   1   0 2671.51  132.73
  -9  -1   0 2745.40  146.31
   9  -1   0 2937.47  154.47
  -9   1  -1 2945.82  165.67
   9   1   1 2908.37  179.92
  -9  -1  -1 3468.30  179.71
   9  -1   1 2979.84  159.91
  -9   1  -2  638.24  108.52
   9   1   2  607.08  117.81
  -9  -1  -2  492.86  105.59
   9  -1   2  411.01   88.88
  -9   1  -3   75.26   41.71
   9   1   3   -6.33   29.21
  -9  -1  -3   34.14   18.54
   9  -1   3   24.79   30.28
  -9   1  -4 2358.43  204.29
   9   1   4 2160.53  323.01
  -9  -1  -4 1577.07  148.37
   9  -1   4 1931.34  226.93
  -9   1  -5  188.85   49.60
   9   1   5  358.26   90.64
  -9  -1  -5  241.81   64.05
   9  -1   5  204.83   78.75
  -9   1  -6 1969.16  129.32
   9   1   6 2550.46  183.94
  -9  -1  -6 2100.85  136.76
   9  -1   6 1751.08  264.71
  -9   1  -7  222.46   95.26
   9   1   7  264.27   86.65
  -9  -1  -7  231.38   75.79
   9  -1   7  287.83   85.95
  -9   1  -8   16.00   25.19
   9   1   8  143.66   59.37
  -9  -1  -8   38.91   50.79
   9  -1   8  229.91   84.94
  -9   1  -9   61.86   35.89
   9   1   9   92.84   67.93
  -9  -1  -9   23.41   18.88
   9  -1   9   21.41   34.67
   9  -3 -10  346.02   83.05
   9   3  -9   83.87   26.07
   9  -3  -9  109.76   47.24
   9   3  -8  193.39   34.66
   9   3  -8  199.74   43.87
   9  -3  -8  192.51   54.17
   9  -3  -8  120.08   30.30
  -9   3   7  775.88  197.92
   9   3  -7 1063.16   91.83
  -9  -3   7  635.12  219.77
   9  -3  -7  320.93  147.04
   9  -3  -7  966.47   79.98
  -9   3   6   86.16   34.70
   9   3  -6   47.18   17.81
  -9  -3   6  106.32   74.09
   9  -3  -6   42.84   19.57
   9  -3  -6   59.78   20.95
  -9   3   5 1467.14  190.81
   9   3  -5 1304.69  141.74
  -9  -3   5 1229.28  150.00
   9  -3  -5 1057.79  124.71
   9  -3  -5 1224.01  132.17
   9   3  -4 1201.28  121.12
  -9   3   4  860.99  109.66
   9  -3  -4 1499.68  149.03
  -9  -3   4 1265.33  214.37
  -9   3   3  133.45   80.15
   9   3  -3  135.80   46.47
  -9   3   3  125.02   30.41
  -9  -3   3  227.29   80.56
   9  -3  -3  193.11   49.75
  -9  -3   3   96.72   31.46
  -9   3   2  223.18   61.70
  -9   3   2  201.21   33.67
   9   3  -2  160.15   39.33
   9  -3  -2  178.31   34.08
  -9  -3   2  199.84   60.66
  -9  -3   2  196.46   36.03
  -9   3   1 3879.39  221.43
   9   3  -1 2778.88  140.86
  -9  -3   1 2812.47  157.09
   9  -3  -1 2884.87  151.96
   9   3   0 1709.67   99.87
  -9   3   0 1577.49  161.41
  -9   3   0 1432.03  103.38
   9  -3   0 1662.33   95.77
  -9  -3   0 1737.20  101.90
  -9   3  -1 1935.98  163.59
   9   3   1 2369.95  134.55
  -9  -3  -1 2358.57  137.01
   9  -3   1 2184.55  124.08
  -9   3  -2   14.45   30.68
   9   3   2   37.04   28.60
  -9  -3  -2  115.24   27.19
   9  -3   2   44.77   24.52
  -9   3  -3  509.82   84.75
   9   3   3  224.07   65.74
  -9  -3  -3  279.87   53.32
   9  -3   3  374.71   98.81
  -9   3  -4   92.22   49.11
   9   3   4   38.55   33.14
  -9  -3  -4   82.86   39.72
   9  -3   4   28.74   35.43
  -9   3  -5 1833.11  194.01
   9   3   5 1706.38  173.60
  -9  -3  -5 1729.12  185.73
   9  -3   5 1801.14  171.10
  -9   3  -6   60.16   25.61
   9   3   6  144.20   54.99
  -9  -3  -6   23.04   18.78
   9  -3   6   68.80   44.34
  -9   3  -7   66.13   30.53
   9   3   7  169.61   81.00
  -9  -3  -7   69.27   32.49
   9  -3   7  133.08   73.07
  -9   3  -8   79.15   30.48
   9   3   8  235.94  111.98
  -9  -3  -8  222.15   49.15
   9  -3   8  240.48   87.39
   9   3   9  261.32  119.33
  -9  -3  -9   25.76   25.02
   9  -3   9  137.67   95.23
   9  -5  -9  142.67   53.86
   9   5  -8  149.01   30.07
   9   5  -8  200.65   35.12
   9  -5  -8  201.05   50.23
  -9   5   7   61.53   65.51
   9   5  -7  160.99   34.95
  -9  -5   7  192.00   66.58
   9  -5  -7   80.03   30.74
  -9   5   6  538.09  122.24
   9   5  -6  431.71  117.53
  -9  -5   6  559.96  112.17
   9  -5  -6  364.69   88.77
  -9   5   5  547.38  192.98
   9   5  -5  266.21   79.53
   9  -5  -5  144.94   37.66
   9  -5  -5   82.46   22.26
  -9  -5   5  147.58   67.22
  -9   5   4 6485.05  689.12
   9   5  -4 6004.82  425.22
  -9  -5   4 6121.70  451.11
   9  -5  -4 6161.90  434.64
  -9   5   3  206.61   60.28
  -9   5   3  100.86   23.07
   9   5  -3   89.67   22.39
   9  -5  -3  119.05   34.06
  -9  -5   3   81.75   44.72
  -9   5   2  648.63  132.73
  -9   5   2  689.77  108.39
   9   5  -2  720.69  109.29
   9  -5  -2  685.16  159.69
  -9  -5   2  542.11  128.47
  -9   5   1  560.77   98.03
   9   5  -1  392.34   93.61
  -9  -5   1  401.34  104.20
   9  -5  -1  424.16  104.96
  -9   5   0 3939.46  191.82
  -9   5   0 3243.17  291.79
   9   5   0 3616.55  186.66
   9  -5   0 3434.20  173.05
  -9  -5   0 4088.56  207.62
  -9   5  -1  308.43   86.85
   9   5   1  356.23   65.29
  -9  -5  -1  326.79   72.18
   9  -5   1  187.94   48.04
  -9   5  -2 3404.29  240.36
   9   5   2 3541.06  216.31
  -9  -5  -2 3144.98  190.17
   9  -5   2 3868.38  238.11
  -9   5  -3  596.77   87.41
   9   5   3  513.68  113.49
  -9  -5  -3  703.91  102.22
   9  -5   3  660.53  170.62
  -9   5  -4  621.48  123.85
   9   5   4  634.56  118.47
  -9  -5  -4  768.59  149.75
   9  -5   4  593.58  102.91
  -9   5  -5  519.40   89.87
   9   5   5  558.24   93.51
  -9  -5  -5  397.34  110.36
   9  -5   5  440.18  104.30
  -9   5  -6   41.73   40.20
   9   5   6   39.05   44.00
  -9  -5  -6   77.14   27.21
   9  -5   6   84.42   54.31
  -9   5  -7   18.60   35.29
   9   5   7  -48.23   56.66
  -9  -5  -7   52.78   28.54
   9  -5   7  -34.96   47.55
  -9   5  -8 2077.02  238.76
   9   5   8 1846.91  218.14
  -9  -5  -8 2184.15  192.05
   9  -5   8 2175.37  211.09
   9   5   9  136.47   67.30
  -9  -5  -9   48.47   26.92
   9  -5   9   95.14   44.64
   9   7 -10  449.18  177.90
   9  -7 -10  798.13  150.45
   9   7  -9  424.18   43.05
   9  -7  -9  422.49   50.63
   9   7  -8 2323.63  236.04
   9   7  -8 2611.65  267.17
   9  -7  -8 2490.22  256.23
   9  -7  -8 2227.34  222.38
  -9   7   7   95.63   62.10
   9   7  -7  100.80   25.69
  -9  -7   7  156.46   58.43
   9  -7  -7   39.44   13.75
  -9   7   6 1396.17  253.31
   9   7  -6 1009.95  212.00
   9   7  -6 1481.41  140.71
  -9  -7   6 1235.23  131.95
   9  -7  -6 1255.10  105.38
   9  -7  -6 1569.09  109.75
  -9   7   5 2051.85  272.28
   9   7  -5 1317.71  252.73
  -9  -7   5 1273.89  207.09
   9  -7  -5 1451.43  118.29
  -9   7   4   -9.30   75.82
   9   7  -4  185.29   48.56
   9   7  -4  102.58   32.83
   9  -7  -4  118.70   34.16
  -9  -7   4   87.76   52.91
  -9   7   3  554.76  103.95
   9   7  -3  488.64   64.29
   9   7  -3  385.66   70.82
  -9   7   3  607.05   98.00
   9  -7  -3  616.96   70.00
  -9  -7   3  575.90  114.38
  -9   7   2  214.98   69.97
  -9   7   2  148.55   36.39
   9   7  -2  118.15   31.87
   9  -7  -2   76.19   28.36
  -9  -7   2  169.00   53.88
  -9   7   1   37.56   51.84
  -9   7   1   96.58   23.37
   9   7  -1   90.54   42.23
   9  -7  -1  104.13   33.71
  -9  -7   1  104.08   30.18
  -9   7   0 2612.40  324.05
   9   7   0 2123.01  213.60
  -9   7   0 2226.14  147.18
   9  -7   0 2244.89  120.57
  -9  -7   0 2749.28  175.41
  -9   7  -1 1200.17  132.98
   9   7   1 1092.83  115.20
  -9   7  -1 1188.35  132.41
   9  -7   1 1498.47  227.45
  -9  -7  -1 1343.92  137.02
  -9   7  -2 4208.53  311.24
   9   7   2 4380.64  347.29
  -9  -7  -2 4138.89  299.41
   9  -7   2 4551.49  336.06
  -9   7  -3 6078.26  487.46
   9   7   3 7218.66  576.79
  -9  -7  -3 6227.58  507.86
   9  -7   3 6427.26  514.65
  -9   7  -4   10.71   34.26
   9   7   4  142.14   62.77
  -9  -7  -4   31.50   24.13
   9  -7   4  122.09   50.30
  -9   7  -5  186.30   65.69
   9   7   5  264.54   71.62
  -9  -7  -5  135.44   43.45
   9  -7   5  162.97   56.38
  -9   7  -6  332.17  110.53
   9   7   6  367.59   71.69
  -9  -7  -6  291.20  134.13
   9  -7   6  369.45   59.48
   9   7   7  415.24  109.54
  -9  -7  -7  481.16  143.56
   9  -7   7  490.54  138.94
  -9   7  -8  267.18  106.36
   9   7   8  394.46  127.74
  -9  -7  -8  307.00  105.42
   9  -7   8  510.74  141.54
   9   7   9 1926.26  417.78
   9  -7   9 1937.85  464.56
   9   9 -10  442.02  151.56
   9  -9 -10  700.27  179.82
   9   9  -9 1359.85  143.95
   9  -9  -9 1594.55  130.16
   9   9  -8  667.50  107.34
   9  -9  -8  670.78  161.56
  -9   9   7  293.62  120.89
   9   9  -7  164.31   30.66
  -9  -9   7  226.42   56.20
  -9   9   6  206.82  103.71
   9   9  -6  219.12   27.91
   9   9  -6  325.97   61.25
  -9  -9   6  118.79   83.72
   9  -9  -6   96.78   41.92
   9  -9  -6   97.32   31.01
  -9   9   5  224.26   91.17
   9   9  -5  105.88   40.81
   9  -9  -5   30.05   17.74
   9  -9  -5   59.06   17.22
  -9  -9   5   97.34   50.10
  -9   9   4  420.77   92.66
   9   9  -4  507.63   83.76
   9   9  -4  280.37   57.68
   9  -9  -4  470.19   56.87
  -9  -9   4  566.77   98.12
  -9   9   3 2967.50  239.57
   9   9  -3 3606.97  262.72
   9   9  -3 3778.17  270.80
  -9   9   3 3376.86  239.18
   9  -9  -3 3444.89  246.87
  -9  -9   3 3047.56  228.55
  -9   9   2 4241.31  366.35
  -9   9   2 4056.13  230.65
   9   9  -2 4679.39  305.50
   9  -9  -2 3822.12  227.66
  -9  -9   2 3837.74  230.82
  -9   9   1  949.07  190.72
  -9   9   1  667.44   94.75
   9   9  -1  641.57  103.98
   9  -9  -1  636.64  109.88
  -9  -9   1  910.90  181.15
  -9   9   0  220.83   90.98
   9   9   0  128.84   38.29
  -9   9   0  137.67   35.43
   9  -9   0  188.30   62.75
  -9  -9   0  178.39   45.99
  -9   9  -1  613.85   91.88
   9   9   1  362.32   74.77
  -9   9  -1  314.52   80.19
   9  -9   1  424.75   57.89
  -9  -9  -1  456.34  102.16
  -9   9  -2  315.19   64.79
   9   9   2  310.42   54.23
  -9  -9  -2  410.24   86.70
   9  -9   2  425.12   71.58
  -9   9  -3 2880.90  281.09
   9   9   3 2805.65  238.19
  -9  -9  -3 3310.92  269.30
   9  -9   3 3050.54  255.39
  -9   9  -4   16.52   32.58
   9   9   4   47.66   32.00
  -9  -9  -4   25.81   21.72
   9  -9   4  138.45   59.86
  -9   9  -5  257.84   52.34
   9   9   5  449.32   93.26
  -9  -9  -5  377.50   98.90
   9  -9   5  278.72   63.36
  -9   9  -6   37.31   30.43
   9   9   6   85.10   54.99
  -9  -9  -6  104.61   34.91
   9  -9   6   17.46   40.61
  -9   9  -7 1084.98  276.31
   9   9   7 1135.24  330.55
  -9  -9  -7 1403.83  141.02
   9  -9   7 1369.04  171.68
  -9   9  -8   54.15   26.98
   9   9   8   59.61   51.57
  -9  -9  -8   56.54   30.09
   9  -9   8   84.57   56.65
   9  11 -10  491.31  159.49
   9 -11 -10  719.45  134.06
   9  11  -9  527.92  176.43
   9 -11  -9  543.12  118.80
   9  11  -8   95.58   33.97
   9  11  -8  159.77   44.88
   9 -11  -8  281.19   70.17
   9  11  -7  199.79   54.39
  -9 -11   7  184.36   61.23
  -9  11   6 -101.77   86.35
   9  11  -6   62.80   25.24
  -9  11   5 2450.64  310.26
   9  11  -5 2150.44  206.30
   9  11  -5 2192.07  152.55
   9 -11  -5 1792.60  120.85
  -9 -11   5 2216.96  175.08
  -9  11   4  668.56  163.18
   9  11  -4  284.00   49.67
   9 -11  -4  253.15   60.55
   9 -11  -4  200.82   51.20
  -9 -11   4  215.99   55.08
  -9  11   3  194.98   83.40
   9  11  -3   42.09   29.15
   9  11  -3   39.39   20.79
   9 -11  -3   11.49   14.71
  -9 -11   3   25.10   26.27
  -9  11   2  266.59   76.42
   9  11  -2  342.55   53.58
  -9  11   2  389.80   45.79
   9 -11  -2  461.42   92.41
  -9 -11   2  462.14   87.47
  -9  11   1  396.79   95.35
   9  11  -1  378.09   55.16
  -9 -11   1  476.23   89.91
   9 -11  -1  393.46   53.88
  -9  11   0  167.76   68.95
   9  11   0  303.74  108.47
  -9 -11   0  182.38   54.52
   9 -11   0  220.35   52.26
  -9  11  -1  734.95  151.35
   9  11   1  475.80   64.88
  -9 -11  -1  509.57  106.17
   9 -11   1  466.01   93.71
  -9  11  -2  617.18  116.11
   9  11   2  305.81   65.04
  -9 -11  -2  358.27   64.81
   9 -11   2  382.59   98.45
  -9  11  -3  261.98   73.41
   9  11   3  380.50   76.52
  -9 -11  -3  353.41   87.64
   9 -11   3  452.76   86.88
  -9  11  -4  616.79  121.21
   9  11   4  737.13  150.90
  -9 -11  -4  687.63  168.46
   9 -11   4  709.81  113.47
  -9  11  -5   55.97   29.54
   9  11   5   60.72   25.92
  -9 -11  -5   91.30   41.71
   9 -11   5  -18.72   39.48
  -9  11  -6  381.99  100.45
  -9 -11  -6  492.78   94.59
   9 -11   6  591.64   94.50
  -9  11  -7   23.98   27.37
   9  11   7   44.69   25.01
  -9 -11  -7   20.61   32.85
   9 -11   7  138.35   80.30
  -9  11  -8  334.34  139.30
  -9 -11  -8 1018.23  183.28
   9 -11   8  603.46  182.51
   9  13 -10  106.16   58.42
   9 -13 -10  238.34   76.96
   9  13  -9  108.79   31.24
   9 -13  -9  181.85   88.20
   9  13  -8 1974.28  190.23
   9 -13  -8 2301.81  222.33
   9  13  -7 1020.33  172.32
   9 -13  -7 1102.54  197.64
  -9  13   6  184.68   86.54
   9  13  -6   41.67   25.05
  -9  13   5  101.99   72.56
   9  13  -5   47.39   18.33
   9  13  -5   43.51   25.44
  -9  13   4  568.79  116.35
   9  13  -4  516.18   83.38
   9  13  -4  284.32   70.38
   9 -13  -4  351.16   59.50
  -9 -13   4  813.10  146.93
  -9  13   3  724.46  158.12
  -9  13   3  450.86   72.35
   9  13  -3  414.71   93.14
   9 -13  -3  409.69   89.31
  -9 -13   3  392.26   85.11
  -9  13   2  606.33  117.92
   9  13  -2  876.45  126.18
  -9  13   2  874.75   98.32
   9 -13  -2  794.65  135.15
  -9 -13   2 1095.34  156.46
  -9  13   1 1546.76  363.67
   9  13  -1 2352.75  179.04
  -9  13   1 2170.72  157.05
   9 -13  -1 2284.52  170.22
  -9 -13   1 2763.24  260.00
  -9  13   0  617.26  110.22
   9  13   0  636.81  125.79
  -9 -13   0  515.77  100.31
   9 -13   0  626.52  118.55
  -9  13  -1  643.62  223.76
   9  13   1  631.47  136.61
  -9 -13  -1  815.21  178.47
   9 -13   1  584.94  131.20
  -9  13  -2  560.53  137.07
   9  13   2  427.72   78.52
  -9 -13  -2  616.07  134.80
   9 -13   2  425.80   76.44
  -9  13  -3  182.15   70.05
   9  13   3   48.90   39.85
  -9 -13  -3   49.30   21.79
   9 -13   3   48.42   28.56
  -9  13  -4  223.16   59.31
   9  13   4  330.55   94.98
  -9 -13  -4  425.01  138.37
   9 -13   4  591.18   75.18
  -9  13  -5 2343.81  220.10
   9  13   5 2596.47  177.49
  -9 -13  -5 2880.14  219.31
   9 -13   5 2604.21  242.03
  -9  13  -6  201.72   57.00
   9  13   6  339.74   85.52
  -9 -13  -6  224.90   51.44
   9 -13   6  259.85   73.60
  -9  13  -7  407.56   85.44
   9  13   7  525.40  107.95
  -9 -13  -7  507.65   83.47
   9 -13   7  378.72   85.40
  -9  13  -8   70.93   53.78
   9  13   8  459.59  115.31
  -9 -13  -8  311.57   99.14
   9 -13   8  351.93  120.06
   9  15  -9 1598.19  273.84
   9 -15  -9 1766.25  302.32
   9  15  -8  454.44  147.29
   9 -15  -8  576.11  183.58
   9  15  -7 4704.58  477.89
   9 -15  -7 4866.49  137.80
  -9  15   6  710.64  104.33
   9  15  -6  700.07  140.53
  -9 -15   6  631.03   94.55
  -9  15   5  519.06  115.23
   9  15  -5  745.27   77.56
  -9 -15   5  624.72   87.48
  -9  15   4  184.31   95.39
   9  15  -4   31.30   15.66
   9  15  -4   30.53   29.37
  -9 -15   4   43.90   36.87
  -9  15   3 1397.32  224.42
   9  15  -3  791.42  115.24
   9  15  -3  619.34  134.89
   9 -15  -3  810.33  113.38
  -9 -15   3  744.91  143.38
  -9  15   2  402.29  134.01
   9  15  -2  250.47   63.54
  -9  15   2  279.18   57.50
   9 -15  -2  323.19   55.23
  -9 -15   2  322.15   71.19
  -9  15   1 6339.34  521.55
   9  15  -1 7681.21  605.39
  -9 -15   1 6483.47  510.20
   9 -15  -1 7703.73  605.46
  -9  15   0 4733.89  456.88
  -9  15   0 4585.06  361.13
   9  15   0 5547.33  440.88
   9 -15   0 5681.97  451.57
  -9 -15   0 4985.73  394.83
  -9  15  -1 2900.98  459.59
   9  15   1 2599.26  217.54
  -9 -15  -1 2740.96  235.74
   9 -15   1 2839.33  237.34
  -9  15  -2  380.24  177.26
   9  15   2  251.58   67.35
  -9 -15  -2  357.50   93.13
   9 -15   2  193.49   58.68
  -9  15  -3 1987.78  396.13
   9  15   3 2146.04  217.86
  -9 -15  -3 1951.01  163.95
   9 -15   3 1948.57  272.31
  -9  15  -4  401.58   90.70
   9  15   4   97.59   43.99
  -9 -15  -4  231.16   64.86
   9 -15   4  131.81   45.51
  -9  15  -5 2633.10  440.06
   9  15   5 1874.92  273.30
  -9 -15  -5 2204.78  231.12
   9 -15   5 2005.32  219.23
  -9  15  -6  297.46  103.83
   9  15   6  517.60   99.45
  -9 -15  -6  408.41  102.59
   9 -15   6  397.34  105.72
   9  15   7  951.08  227.38
  -9 -15  -7  851.09  123.10
   9 -15   7  492.72  232.58
   9  15   8   53.53   50.90
  -9 -15  -8   44.60   40.71
   9 -15   8   16.42   51.80
   9  17  -9   98.13   48.17
   9 -17  -9  258.46   72.66
   9  17  -8  870.30  227.65
   9 -17  -8 1403.43  138.33
   9  17  -7   48.30   43.07
   9 -17  -7   24.81   33.63
   9  17  -6  468.02   91.16
  -9 -17   6  459.87   85.48
  -9  17   5  137.98   66.97
   9  17  -5   61.98   24.92
  -9  17   4  247.84  109.06
   9  17  -4   70.97   28.48
  -9 -17   4   78.11   33.69
  -9  17   3  248.63  104.60
   9  17  -3  199.94   50.38
   9  17  -3  173.48   50.64
  -9 -17   3  237.87   62.55
  -9  17   2  304.02  131.94
   9  17  -2  129.25   46.70
  -9 -17   2  148.50   44.18
   9 -17  -2  151.19   40.22
  -9  17   1 4234.83  334.39
   9  17  -1 4785.38  330.70
  -9 -17   1 4046.84  275.50
  -9  17   0  974.24  203.55
  -9  17   0 1291.69   95.32
   9  17   0 1456.41  255.11
   9 -17   0 1658.47  158.07
  -9 -17   0 1410.30  158.21
  -9  17  -1  609.33  155.25
   9  17   1  373.24  110.19
  -9 -17  -1  374.47  113.61
   9 -17   1  422.07   76.96
  -9  17  -2  264.44   66.10
   9  17   2  321.29   58.30
  -9 -17  -2  364.31   66.72
   9 -17   2  422.12   74.91
  -9  17  -3  163.90   92.63
   9  17   3  -22.25   29.45
  -9 -17  -3    2.63   29.53
   9 -17   3   20.90   43.29
  -9  17  -4 1339.24  301.21
   9  17   4 1345.06  118.19
  -9 -17  -4 1322.64  100.43
   9 -17   4 1151.03  249.91
  -9  17  -5  603.23  158.92
   9  17   5  601.54  109.88
  -9 -17  -5  577.74  102.99
   9 -17   5  361.61   98.12
  -9  17  -6 2005.21  548.58
   9  17   6 2400.35  213.13
  -9 -17  -6 2872.96  201.60
   9 -17   6 2666.27  237.74
  -9  17  -7   87.79   49.61
   9  17   7  263.12   59.92
  -9 -17  -7   88.45   49.11
   9 -17   7  301.05   67.94
   9  19  -9  106.65   48.12
   9 -19  -9  120.95   38.46
   9  19  -8  415.70  137.54
   9 -19  -8  329.76  154.22
   9  19  -7 1242.72  148.51
   9 -19  -7  863.18  265.26
   9 -19  -6  562.90  140.06
  -9  19   5  177.03  141.70
   9  19  -5   49.81   25.68
  -9 -19   5   58.92   38.61
  -9  19   4  434.99   88.08
   9  19  -4  689.30  137.24
  -9 -19   4  570.23   63.07
  -9  19   3  160.15   86.99
   9  19  -3   63.80   28.88
  -9 -19   3  142.92   33.13
  -9  19   2  223.49   58.14
   9  19  -2  121.11   45.84
  -9 -19   2  126.55   55.54
   9 -19  -2  103.87   31.17
  -9  19   1   72.80   75.92
  -9  19   1   69.79   22.78
   9  19  -1  120.60   51.95
   9 -19  -1   35.65   24.76
  -9 -19   1   58.19   27.97
  -9  19   0  296.23   89.49
   9  19   0  367.35   76.45
  -9 -19   0  257.98   48.32
   9 -19   0  247.78   60.05
  -9  19  -1  113.70   71.27
   9  19   1   99.20   48.47
  -9 -19  -1   68.15   27.75
   9 -19   1  172.13   59.53
  -9  19  -2  116.95   48.66
   9  19   2   65.14   33.96
  -9 -19  -2   64.45   16.46
  -9  19  -3   86.76   81.29
   9  19   3   68.29   27.72
  -9 -19  -3   85.79   27.33
   9 -19   3   44.96   38.15
  -9  19  -4  219.65   83.68
   9  19   4   64.11   37.10
   9 -19   4  113.01   41.02
  -9  19  -5  101.63   69.16
   9  19   5  150.83   66.78
  -9 -19  -5   71.03   28.79
   9 -19   5  160.01   69.99
  -9  19  -6  180.87   76.73
   9  19   6  123.71   59.14
  -9 -19  -6  225.47   73.16
   9 -19   6  350.34   89.43
  -9  19  -7   68.59   69.68
   9  19   7  217.14   66.67
  -9 -19  -7  182.25   70.07
   9 -19   7  264.48   89.44
   9  21  -8  792.34   95.12
   9 -21  -8  536.94  217.88
   9  21  -7  323.90   63.03
   9 -21  -7  284.67   72.51
   9  21  -6   83.77   48.79
   9 -21  -6   11.32   26.93
  -9  21   5 1978.20  260.84
   9  21  -5 2132.20  223.99
  -9  21   4 2133.74  603.06
   9  21  -4 2872.25  230.27
  -9 -21   4 2107.87  218.49
  -9  21   3  311.70   64.33
   9  21  -3   52.38   35.14
  -9 -21   3   32.95   21.44
  -9  21   2 1703.98  271.35
   9  21  -2 1566.78  153.49
  -9 -21   2 2127.53  246.53
  -9  21   1  682.05  141.27
   9  21  -1  373.38   60.40
  -9 -21   1  292.19   74.67
  -9  21   0  267.05   85.42
   9  21   0  178.10   48.20
  -9 -21   0   78.91   24.29
   9 -21   0  155.41   43.32
  -9  21  -1 1545.39  212.96
   9  21   1 1108.90  194.19
  -9 -21  -1 1540.34  151.05
   9 -21   1 1410.36  178.81
  -9  21  -2 1348.53  138.94
   9  21   2  925.01   76.57
  -9 -21  -2 1000.22   64.70
   9 -21   2  959.82  202.86
  -9  21  -3  283.68   77.81
   9  21   3  422.64   65.61
  -9 -21  -3  528.05  133.61
   9 -21   3  541.76  101.01
  -9  21  -4  207.79   76.73
   9  21   4  609.15  134.76
  -9 -21  -4  515.11  103.07
   9 -21   4  309.40   89.64
  -9  21  -5  400.42  132.48
   9  21   5  970.88  152.46
  -9 -21  -5  723.23  208.40
   9 -21   5 1022.96  163.51
   9  21   6  129.32   59.03
  -9 -21  -6  260.54   62.84
   9 -21   6  160.88   61.34
  -9 -21  -7   28.86   28.37
   9 -21   7  -13.18   56.28
   9  23  -8   33.08   29.20
   9 -23  -8   14.01   59.21
   9  23  -7  107.14   44.32
   9 -23  -7  105.42   30.43
   9  23  -6  477.97  148.58
   9 -23  -6  488.70   83.97
   9  23  -5   86.28   48.06
   9 -23  -5  125.18   58.33
  -9  23   4 1195.64  428.35
   9  23  -4 1986.30  214.26
  -9 -23   4 1732.06  182.68
  -9  23   3  121.86   61.37
   9  23  -3   64.38   24.41
  -9 -23   3   16.19   11.43
  -9  23   2  558.19  178.60
   9  23  -2  499.52   57.70
  -9 -23   2  424.32  119.82
  -9  23   1  798.75  153.03
   9  23  -1  740.81   78.98
  -9 -23   1  710.23   52.39
  -9  23   0  135.78   53.80
   9  23   0  299.98   87.89
  -9 -23   0  300.86   99.85
   9 -23   0  300.50   50.42
  -9  23  -1  341.78  113.51
   9  23   1   67.48   27.89
  -9 -23  -1  117.36   32.83
  -9  23  -2 2480.64  296.00
   9  23   2 2249.82  244.09
  -9 -23  -2 2256.25  233.16
  -9  23  -3  464.03  109.99
   9  23   3  550.58  125.01
  -9 -23  -3  867.05  142.30
   9 -23   3  501.18  124.41
  -9  23  -4  889.90  283.59
   9  23   4 1320.77  225.84
  -9 -23  -4 1063.74  230.16
   9 -23   4 1136.48  139.51
   9  23   5  110.53   44.32
  -9 -23  -5   33.90   27.13
   9 -23   5   76.20   46.93
  -9  23  -6  449.55  197.50
   9  23   6  939.88  187.72
  -9 -23  -6 1040.61  264.37
   9 -23   6  611.44  288.60
   9  25  -7  152.21   52.28
   9 -25  -7  -20.36   37.78
   9  25  -6  112.57   49.65
   9 -25  -6   13.72   26.58
   9  25  -5  587.36   90.78
   9 -25  -5  571.66   94.19
   9  25  -4  290.94   64.74
  -9  25   3  390.39  218.89
   9  25  -3  704.59  115.33
  -9 -25   3  338.76  141.52
   9  25  -2   26.85   32.33
  -9  25   1  415.71  118.03
   9  25  -1  185.70   50.58
  -9 -25   1  206.93   59.36
  -9  25   0  253.04  124.76
   9  25   0  643.83  151.82
  -9 -25   0  661.09  107.34
  -9  25  -1 1256.26  307.40
   9  25   1 1706.73  170.55
  -9 -25  -1 1842.23  183.30
   9 -25   1 1321.09  207.32
  -9  25  -2  341.54  107.78
   9  25   2  166.92   57.00
  -9 -25  -2  113.51   47.20
   9 -25   2   55.80   36.74
  -9  25  -3 1065.36  139.45
   9  25   3 1078.41  105.80
  -9 -25  -3  528.44  180.18
   9 -25   3  720.38  239.35
  -9  25  -4  130.60  129.61
   9  25   4   65.07   43.25
  -9 -25  -4   56.29   28.30
   9 -25   4   26.22   42.65
   9  25   5  162.60   66.35
  -9 -25  -5  102.32   34.54
   9 -25   5  146.68   79.77
   9  27  -6  257.44   94.36
   9 -27  -6  248.38   97.52
   9  27  -5  180.48   99.86
   9 -27  -5  401.90  103.62
   9  27  -4  633.67  138.64
   9 -27  -4  397.35  139.43
  -9  27   3   -2.65   93.50
   9  27  -3  154.76   52.03
  -9  27   2  149.88   96.25
   9  27  -2  119.81   49.22
  -9 -27   2  122.08   35.32
   9  27  -1   29.46   27.67
  -9  27   0  255.65   64.91
   9  27   0  113.48   48.79
  -9 -27   0  123.49   50.64
  -9  27  -1  292.26   73.19
   9  27   1  305.46   84.38
  -9 -27  -1  446.42  132.28
  -9  27  -2  -17.68   80.50
   9  27   2   36.57   39.15
  -9 -27  -2   21.83   14.06
   9 -27   2   66.37   37.72
  -9  27  -3  961.13  218.20
   9  27   3  823.49  103.87
   9 -27   3  503.75  179.83
   9  27   4   58.61   26.58
  -9 -27  -4   50.92   29.59
   9 -27   4   69.03   44.31
   9  27   5  100.55   56.29
  -9 -27  -5  105.12   38.28
   9 -27   5  205.22   77.21
   9  29  -5   78.51   42.24
   9 -29  -5   94.61   40.11
   9  29  -4  240.36   59.66
   9 -29  -4  322.92  109.47
   9  29  -3  221.74   58.58
   9 -29  -3   57.03   50.63
  -9  29   2  184.74  100.56
   9  29  -2   49.92   26.97
  -9  29   1  235.60   90.37
   9  29  -1  435.75  129.98
  -9 -29   1  407.40  121.65
  -9  29   0  196.03   93.72
   9  29   0  134.34   67.50
  -9 -29   0   48.13   38.87
   9  29   1  103.25   48.63
  -9 -29  -1  129.95   50.91
  -9  29  -2  613.02  328.87
   9  29   2  808.05  248.67
  -9 -29  -2 1445.35  248.69
  -9  29  -3   96.21   60.07
   9  29   3   42.58   23.18
  -9 -29  -3   83.20   33.70
  -9 -29  -4   45.89   34.21
   9  31  -3 1353.76  268.17
   9 -31  -3 1958.96  328.05
   9  31  -2   59.98   30.13
   9 -31  -2   19.02   41.67
   9  31  -1  541.24  231.67
  -9 -31   1  546.20  136.33
  -9  31   0  156.36   81.74
   9  31   0   35.62   14.12
  -9 -31   0   19.94   24.70
  -9  31  -1  210.18  145.90
   9  31   1  948.91  241.69
  -9  31  -2  579.24  238.11
   9  31   2  372.22  134.15
  -9 -31  -2  549.24  256.83
   9  33  -1  307.99   93.93
   9 -33  -1  146.49   71.58
 -10   0   8 3097.08  320.83
  10   0  -8 2984.27  271.35
  10   0  -7    0.31   10.97
 -10   0   6  279.98   83.47
  10   0  -6  214.69   60.31
 -10   0   5  -12.33   66.18
  10   0  -5   19.75   13.84
  10   0  -5   22.75   18.00
 -10   0   4  779.70  183.43
  10   0  -4  703.24  107.85
 -10   0   3  203.70   68.95
  10   0  -3   26.30   20.41
 -10   0   3   18.24   12.52
 -10   0   2 7610.33  463.48
  10   0  -2 5918.89  341.56
 -10   0   1    4.83   49.81
  10   0  -1    8.79   19.82
 -10   0   0 1445.41  213.50
  10   0   0 1281.98  144.25
 -10   0  -1   80.35   49.87
  10   0   1   37.82   29.31
 -10   0  -2 8957.94 1638.62
  10   0   2 7286.18  578.74
 -10   0  -3   44.93   45.64
  10   0   3   40.00   35.08
 -10   0  -4 1526.85  226.36
  10   0   4 1512.63  141.24
 -10   0  -5   38.12   21.23
  10   0   5   28.12   34.71
 -10   0  -6  154.84   39.24
  10   0   6  306.91   88.74
  10   0   7   57.50   52.73
 -10   0  -8   33.17   29.83
  10   0   8  125.63   87.62
  10   2 -10   17.80   22.06
  10   2 -10   29.56   14.94
  10  -2 -10   59.91   40.85
  10  -2  -9 3315.72  223.29
 -10  -2   8  258.94   83.55
  10  -2  -8  285.40   65.43
 -10   2   7  137.46   65.85
  10   2  -7  111.32   33.10
 -10  -2   7  183.86   64.75
  10  -2  -7   71.09   18.95
  10   2  -6  169.92   56.69
 -10   2   6  116.29   83.23
  10  -2  -6  145.39   51.46
 -10  -2   6  317.74  105.17
  10  -2  -6  170.58   51.02
  10   2  -5  212.78   46.81
  10  -2  -5  116.09   36.34
  10  -2  -5  250.14   74.57
 -10  -2   5  176.49   77.74
 -10   2   4  288.16   73.89
  10   2  -4  457.63  126.25
 -10  -2   4  391.03   77.84
  10  -2  -4  440.22   84.87
 -10   2   3 9778.60  714.71
  10   2  -310829.04  761.95
 -10   2   3 9664.29  681.94
 -10  -2   311437.93  825.21
  10  -2  -3 9393.15  662.77
 -10   2   2  122.66   64.77
 -10   2   2    5.85   10.29
  10   2  -2   24.96   20.92
  10  -2  -2   13.62   18.95
 -10  -2   2    7.04   59.33
 -10   2   1  237.24   78.55
 -10   2   1   96.35   25.92
  10   2  -1  101.65   30.00
  10  -2  -1   35.65   25.18
 -10  -2   1  138.28   60.43
 -10   2   0   24.77   30.83
  10   2   0   32.75   41.52
 -10  -2   0   34.98   35.79
  10  -2   0   16.95   24.57
 -10   2  -1 1326.76  201.80
  10   2   1 1702.65  331.45
 -10  -2  -1 1714.41  403.24
  10  -2   1 1418.02  264.50
 -10   2  -2   11.19   27.46
  10   2   2   25.12   33.19
 -10  -2  -2   78.65   39.57
  10  -2   2   43.27   29.09
  10   2   3 6132.64  424.21
 -10   2  -3 7434.69  509.74
  10  -2   3 7365.70  506.02
 -10  -2  -3 8179.42  559.75
 -10   2  -4  539.27   86.34
  10   2   4  463.15  100.49
 -10  -2  -4  327.32  100.59
  10  -2   4  379.75   72.11
 -10   2  -5  417.51   68.34
[truncated: 81,961 more chars]
