# Supplementary material
Source: MDPI journal article supplement (https://www.mdpi.com/2304-6740/5/3/53)
Supplement: s1 [file s1 › New folder/1-Cl300K.cif]

data_global
_audit_creation_date                               2017-03-26
_audit_creation_method                            'by CrystalStructure 4.2.2'
_audit_update_record                               ?

#==============================================================================
# PROCESSING SUMMARY (IUCr Office Use Only)

_journal_date_recd_electronic                      ?
_journal_date_from_coeditor                        ?
_journal_date_accepted                             ?
_journal_coeditor_code                             ?

#==============================================================================
# SUBMISSION DETAILS

_publ_contact_author_name                         'ENTER NAME'
_publ_contact_author_email                        'ENTER EMAIL ADDRESS'
_publ_contact_author_fax                          'ENTER FAX NUMBER'
_publ_contact_author_phone                        'ENTER PHONE NUMBER'
_publ_contact_letter
;
    ENTER TEXT OF LETTER
;
_publ_requested_journal                           'ENTER JOURNAL NAME HERE'
_publ_requested_category
                                               'CHOOSE FI FM FO CI CM CO or AD'
_publ_requested_coeditor_name                      ?

#==============================================================================
# TITLE AND AUTHOR LIST

_publ_section_title
;
    ENTER SECTION TITLE
;
_publ_section_title_footnote
;
    ENTER FOOTNOTE TO TITLE OF PAPER
;
loop_
_publ_author_name
_publ_author_footnote
_publ_author_address
' FIRST AUTHORS NAME '
;
  FIRST AUTHORS FOOTNOTES
;
;
  FIRST AUTHORS ADDRESS
;
_publ_section_synopsis
;
    ENTER SYNOPSIS
;

#==============================================================================
# TEXT

_publ_section_abstract
;
    ENTER ABSTRACT
;
_publ_section_comment
;
    ENTER TEXT
;
_publ_section_references
;
    ENTER OTHER REFERENCES

    Rigaku (2016). CrystalStructure. Version 4.2.2. 
    Rigaku Corporation, Tokyo, Japan.

    Altomare, A., Burla, M. C., Camalli, M., Cascarano, G. L., 
    Giacovazzo, C., Guagliardi, A., Moliterni, A. G. G., 
    Polidori, G. and Spagna, R. 
    (1999). J. Appl. Cryst. 32, 115-119.
    SIR97

    Sheldrick, G.M. (2008) SHELXL Version 2014/7, Acta Cryst. A64, 112-122.

    Rigaku (1998). REQAB. 
    Rigaku Corporation, Tokyo, Japan.

;
_publ_section_figure_captions
;
    ENTER FIGURE CAPTIONS
;
_publ_section_exptl_prep
;
    ENTER COMPOUND PREPARATION DETAILS
;
_publ_section_exptl_refinement
;
    ENTER SPECIAL DETAILS OF THE REFINEMENT
;

#==============================================================================
data_1-Cl300K

#==============================================================================
# CHEMICAL DATA

_chemical_formula_sum                             'C34 H21 Cl6 Fe N8 O10'
_chemical_formula_moiety                          'C34 H21 Cl6 Fe N8 O10'
_chemical_formula_weight                           970.15
_chemical_melting_point                            ?

#==============================================================================
# CRYSTAL DATA
_space_group_crystal_system                        monoclinic
_space_group_name_H-M_alt                         'C 1 2/c 1'
_space_group_name_Hall                            '-C 2yc'
_space_group_IT_number                             15
loop_
 _space_group_symop_operation_xyz
 'x, y, z'
 '-x, y, -z+1/2'
 'x+1/2, y+1/2, z'
 '-x+1/2, y+1/2, -z+1/2'
 '-x, -y, -z'
 'x, -y, z-1/2'
 '-x+1/2, -y+1/2, -z'
 'x+1/2, -y+1/2, z-1/2'
#------------------------------------------------------------------------------
_cell_length_a                                     12.665(3)
_cell_length_b                                     31.287(6)
_cell_length_c                                     9.569(2)
_cell_angle_alpha                                  90.0000
_cell_angle_beta                                   97.326(6)
_cell_angle_gamma                                  90.0000
_cell_volume                                       3760.4(13)
_cell_formula_units_Z                              4
_cell_measurement_reflns_used                      6535
_cell_measurement_theta_min                        1.75
_cell_measurement_theta_max                        30.59
_cell_measurement_temperature                      123
#------------------------------------------------------------------------------
_exptl_crystal_description                         prism
_exptl_crystal_colour                              colorless
_exptl_crystal_size_max                            0.200
_exptl_crystal_size_mid                            0.200
_exptl_crystal_size_min                            0.200
_exptl_crystal_density_diffrn                      1.713
_exptl_crystal_density_meas                        ?
_exptl_crystal_density_method                     'not measured'
_exptl_crystal_F_000                               1956.00
_exptl_absorpt_coefficient_mu                      0.897
_exptl_absorpt_correction_type                     multi-scan
_exptl_absorpt_process_details                    'REQAB (Rigaku, 1998)'
_exptl_absorpt_correction_T_min                    0.651
_exptl_absorpt_correction_T_max                    0.836

#==============================================================================
# EXPERIMENTAL DATA

_diffrn_ambient_temperature                        123
_diffrn_radiation_type                            'Mo K\a'
_diffrn_radiation_wavelength                       0.71075
_diffrn_measurement_device_type                   'Rigaku Saturn724'
_diffrn_measurement_method                         \w
_diffrn_detector_area_resol_mean                   14.222
_diffrn_reflns_number                              16406
_diffrn_reflns_av_R_equivalents                    0.0783
_diffrn_reflns_theta_max                           27.456
_diffrn_reflns_theta_min                           3.188
_diffrn_reflns_theta_full                          25.242
_diffrn_measured_fraction_theta_max                0.988
_diffrn_measured_fraction_theta_full               0.995
_diffrn_reflns_Laue_measured_fraction_max          0.988
_diffrn_reflns_Laue_measured_fraction_full         0.995
_diffrn_reflns_point_group_measured_fraction_max   0.988
_diffrn_reflns_point_group_measured_fraction_full  0.995
_diffrn_reflns_limit_h_min                        -16
_diffrn_reflns_limit_h_max                         16
_diffrn_reflns_limit_k_min                        -40
_diffrn_reflns_limit_k_max                         40
_diffrn_reflns_limit_l_min                        -12
_diffrn_reflns_limit_l_max                         12
_diffrn_standards_number                           0
_diffrn_standards_interval_count                   .
_diffrn_standards_decay_%                          ?
_reflns_number_total                               4272
_reflns_number_gt                                  3274
_reflns_threshold_expression                       F^2^>2.0\s(F^2^)
_reflns_Friedel_coverage          0.000
_reflns_Friedel_fraction_max      .
_reflns_Friedel_fraction_full     .

#==============================================================================
# REFINEMENT DATA

_refine_special_details
;
    Refinement was performed using all reflections. The weighted 
    R-factor (wR) and goodness of fit (S) are based on F^2^.
    R-factor (gt) are based on F. The threshold expression of
    F^2^ > 2.0 sigma(F^2^) is used only for calculating R-factor (gt).
;
_refine_ls_structure_factor_coef                   Fsqd
_refine_ls_R_factor_all                            0.0921
_refine_ls_R_factor_gt                             0.0659
_refine_ls_wR_factor_ref                           0.1474
_refine_ls_wR_factor_gt                            0.1339
_refine_ls_number_restraints                       0
_refine_ls_hydrogen_treatment                      mixed
_refine_ls_number_reflns                           4272
_refine_ls_number_parameters                       274
_refine_ls_goodness_of_fit_ref                     1.104
_refine_ls_weighting_scheme                        calc
_refine_ls_weighting_details
           'w = 1/[\s^2^(Fo^2^)+(0.0435P)^2^+8.0081P] where P=(Fo^2^+2Fc^2^)/3'
_atom_sites_solution_hydrogens                     geom
_atom_sites_solution_primary                       direct
_atom_sites_solution_secondary                     difmap
_refine_ls_shift/su_max                            0.000
_refine_diff_density_max                           0.40
_refine_diff_density_min                          -0.34
_refine_ls_extinction_method                       none
_refine_ls_extinction_coef                         ?

loop_
_atom_type_symbol
_atom_type_description
_atom_type_scat_dispersion_real
_atom_type_scat_dispersion_imag
_atom_type_scat_source
  'C' 'C'  0.0033 0.0016 
;
International Tables for Crystallography
(Vol. C, Tables 4.2.6.8 and 6.1.1.4)
;
  'H' 'H'  0.0000 0.0000 
;
International Tables for Crystallography
(Vol. C, Table 6.1.1.4)
;
  'N' 'N'  0.0061 0.0033 
;
International Tables for Crystallography
(Vol. C, Tables 4.2.6.8 and 6.1.1.4)
;
  'O' 'O'  0.0106 0.0060 
;
International Tables for Crystallography
(Vol. C, Tables 4.2.6.8 and 6.1.1.4)
;
  'Fe' 'Fe'  0.3463 0.8444 
;
International Tables for Crystallography
(Vol. C, Tables 4.2.6.8 and 6.1.1.4)
;
  'Cl' 'Cl'  0.1484 0.1585 
;
International Tables for Crystallography
(Vol. C, Tables 4.2.6.8 and 6.1.1.4)
;

#==============================================================================
# ATOMIC COORDINATES AND THERMAL PARAMETERS

loop_
 _atom_site_label
 _atom_site_type_symbol
 _atom_site_fract_x
 _atom_site_fract_y
 _atom_site_fract_z
 _atom_site_U_iso_or_equiv
 _atom_site_adp_type
 _atom_site_occupancy
 _atom_site_site_symmetry_order  
 _atom_site_calc_flag
 _atom_site_refinement_flags_posn
 _atom_site_refinement_flags_adp
 _atom_site_refinement_flags_occupancy
 _atom_site_disorder_assembly
 _atom_site_disorder_group
Fe1 Fe 0.0000 0.16008(2) 0.7500 0.0376(2) Uani 1 2 d S T P . .
Cl1 Cl 0.36719(11) 0.33278(4) 0.71952(15) 0.0775(4) Uani 1 1 d . . . . .
Cl2 Cl 0.55541(9) 0.09437(3) 0.57964(12) 0.0553(3) Uani 1 1 d . . . . .
Cl3 Cl 0.31555(9) -0.01958(4) 0.26069(12) 0.0562(3) Uani 1 1 d . . . . .
O1 O 0.0798(2) 0.19920(9) 0.8700(3) 0.0535(7) Uani 1 1 d . . . . .
O2 O -0.0204(4) 0.26303(14) 0.9727(5) 0.1163(18) Uani 1 1 d . . . . .
O3 O 0.0842(3) 0.31139(11) 1.0604(4) 0.0782(10) Uani 1 1 d . . . . .
O4 O 0.2862(2) 0.07570(9) 0.4103(3) 0.0581(8) Uani 1 1 d . . . . .
O5 O 0.4055(2) 0.09151(9) 0.2685(3) 0.0592(8) Uani 1 1 d . . . . .
N1 N -0.0350(3) 0.11144(10) 0.6004(3) 0.0424(7) Uani 1 1 d . . . . .
N2 N 0.1445(3) 0.11441(10) 0.5879(4) 0.0445(8) Uani 1 1 d . . . . .
N3 N 0.1409(2) 0.15341(9) 0.6553(3) 0.0392(7) Uani 1 1 d . . . . .
N4 N 0.0617(3) 0.28234(12) 0.9773(4) 0.0573(9) Uani 1 1 d . . . . .
C1 C 0.0477(3) 0.09554(11) 0.5453(4) 0.0408(9) Uani 1 1 d . . . . .
C2 C 0.0378(4) 0.06172(14) 0.4499(5) 0.0607(12) Uani 1 1 d . . . . .
H1 H 0.0981 0.0505 0.4128 0.073 Uiso 1 1 calc R U . . .
C3 C -0.0617(4) 0.04507(16) 0.4112(5) 0.0703(14) Uani 1 1 d . . . . .
H2 H -0.0706 0.0217 0.3474 0.084 Uiso 1 1 calc R U . . .
C4 C -0.1499(4) 0.06209(17) 0.4647(5) 0.0698(14) Uani 1 1 d . . . . .
H3 H -0.2196 0.0514 0.4361 0.084 Uiso 1 1 calc R U . . .
C5 C -0.1328(4) 0.09450(14) 0.5591(5) 0.0567(11) Uani 1 1 d . . . . .
H4 H -0.1921 0.1059 0.5982 0.068 Uiso 1 1 calc R U . . .
C6 C 0.2242(3) 0.17806(11) 0.6684(4) 0.0383(8) Uani 1 1 d . . . . .
C7 C 0.3253(3) 0.16457(13) 0.6153(4) 0.0494(10) Uani 1 1 d . . . . .
H6B H 0.3414 0.1349 0.6429 0.059 Uiso 1 1 calc R U . . .
H7A H 0.3837 0.1831 0.6560 0.059 Uiso 1 1 calc R U . . .
H8C H 0.3170 0.1669 0.5124 0.059 Uiso 1 1 calc R U . . .
C8 C 0.2169(3) 0.22044(11) 0.7344(4) 0.0407(9) Uani 1 1 d . . . . .
C9 C 0.2852(3) 0.25303(13) 0.7032(4) 0.0463(9) Uani 1 1 d . . . . .
H9 H 0.3366 0.2473 0.6414 0.056 Uiso 1 1 calc R U . . .
C10 C 0.2799(3) 0.29332(13) 0.7600(5) 0.0520(11) Uani 1 1 d . . . . .
C11 C 0.2065(3) 0.30279(13) 0.8487(5) 0.0527(10) Uani 1 1 d . . . . .
H10 H 0.2020 0.3308 0.8860 0.063 Uiso 1 1 calc R U . . .
C12 C 0.1391(3) 0.27081(12) 0.8826(4) 0.0455(9) Uani 1 1 d . . . . .
C13 C 0.1412(3) 0.22918(12) 0.8284(4) 0.0436(9) Uani 1 1 d . . . . .
C14 C 0.3710(3) 0.06972(12) 0.3655(4) 0.0420(9) Uani 1 1 d . . . . .
C15 C 0.4409(3) 0.03367(11) 0.4307(4) 0.0377(8) Uani 1 1 d . . . . .
C16 C 0.5249(3) 0.04183(11) 0.5357(4) 0.0389(8) Uani 1 1 d . . . . .
C17 C 0.4171(3) -0.00837(12) 0.3951(4) 0.0389(8) Uani 1 1 d . . . . .
H5 H 0.189(3) 0.1109(13) 0.541(4) 0.047(13) Uiso 1 1 d . . . . .
H11 H 0.5000 0.092(4) 0.2500 0.22(6) Uiso 1 2 d S . P . .

loop_
 _atom_site_aniso_label
 _atom_site_aniso_U_11
 _atom_site_aniso_U_22
 _atom_site_aniso_U_33
 _atom_site_aniso_U_23
 _atom_site_aniso_U_13
 _atom_site_aniso_U_12
Fe1 0.0313(4) 0.0405(4) 0.0430(4) 0.000 0.0133(3) 0.000
Cl1 0.0739(9) 0.0658(7) 0.0913(9) 0.0114(7) 0.0053(7) -0.0295(6)
Cl2 0.0619(7) 0.0405(5) 0.0626(7) -0.0084(5) 0.0043(5) -0.0003(5)
Cl3 0.0495(6) 0.0614(6) 0.0538(6) -0.0036(5) -0.0081(5) -0.0013(5)
O1 0.0568(19) 0.0526(16) 0.0556(17) -0.0101(14) 0.0248(15) -0.0108(14)
O2 0.084(3) 0.116(3) 0.162(4) -0.081(3) 0.069(3) -0.028(3)
O3 0.090(3) 0.069(2) 0.076(2) -0.0291(19) 0.0084(19) 0.0110(19)
O4 0.0448(17) 0.0662(19) 0.0669(19) 0.0005(16) 0.0217(15) 0.0159(14)
O5 0.057(2) 0.0609(18) 0.0613(19) 0.0199(15) 0.0156(16) 0.0137(15)
N1 0.0383(18) 0.0444(17) 0.0454(18) -0.0028(14) 0.0084(15) -0.0038(14)
N2 0.0364(19) 0.0451(18) 0.055(2) -0.0094(16) 0.0173(17) 0.0014(15)
N3 0.0393(18) 0.0371(15) 0.0434(17) -0.0020(14) 0.0136(14) 0.0001(14)
N4 0.055(2) 0.054(2) 0.063(2) -0.0168(19) 0.0072(19) 0.0031(18)
C1 0.040(2) 0.041(2) 0.043(2) 0.0000(17) 0.0126(17) -0.0007(16)
C2 0.066(3) 0.057(3) 0.063(3) -0.018(2) 0.023(2) -0.010(2)
C3 0.082(4) 0.073(3) 0.058(3) -0.023(2) 0.017(3) -0.029(3)
C4 0.062(3) 0.086(3) 0.063(3) -0.017(3) 0.013(3) -0.027(3)
C5 0.049(3) 0.068(3) 0.054(3) -0.009(2) 0.009(2) -0.009(2)
C6 0.036(2) 0.0412(19) 0.0386(19) 0.0026(16) 0.0093(16) 0.0007(16)
C7 0.036(2) 0.062(2) 0.053(2) -0.009(2) 0.0136(19) -0.0013(18)
C8 0.035(2) 0.0419(19) 0.045(2) 0.0021(17) 0.0037(17) -0.0005(16)
C9 0.038(2) 0.051(2) 0.049(2) 0.0060(19) 0.0027(18) -0.0024(18)
C10 0.044(2) 0.047(2) 0.062(3) 0.006(2) -0.005(2) -0.0083(19)
C11 0.054(3) 0.043(2) 0.059(3) -0.005(2) -0.002(2) 0.0004(19)
C12 0.041(2) 0.042(2) 0.053(2) -0.0082(18) 0.0064(19) 0.0035(17)
C13 0.039(2) 0.048(2) 0.044(2) -0.0020(18) 0.0033(17) -0.0015(17)
C14 0.044(2) 0.0398(19) 0.043(2) -0.0023(17) 0.0080(18) 0.0063(17)
C15 0.035(2) 0.0420(19) 0.0383(19) 0.0015(16) 0.0127(16) 0.0052(16)
C16 0.040(2) 0.0391(18) 0.040(2) -0.0043(16) 0.0131(16) 0.0003(16)
C17 0.0320(19) 0.046(2) 0.041(2) -0.0043(17) 0.0107(16) 0.0000(16)

#==============================================================================
_computing_data_collection
                                             'CrystalClear (Rigaku Inc., 2008)'
_computing_cell_refinement                         CrystalClear
_computing_data_reduction                          CrystalClear
_computing_structure_solution                      SIR97
_computing_structure_refinement
                                      'SHELXL Version 2014/7 (Sheldrick, 2008)'
_computing_publication_material
                                        'CrystalStructure 4.2.2 (Rigaku, 2016)'
_computing_molecular_graphics                     'CrystalStructure 4.2.2'

#==============================================================================
# MOLECULAR GEOMETRY

_geom_special_details
;
 All esds (except the esd in the dihedral angle between two l.s. planes)
 are estimated using the full covariance matrix.  The cell esds are taken
 into account individually in the estimation of esds in distances, angles
 and torsion angles; correlations between esds in cell parameters are only
 used when they are defined by crystal symmetry.  An approximate (isotropic)
 treatment of cell esds is used for estimating esds involving l.s. planes.
;

loop_
 _geom_bond_atom_site_label_1
 _geom_bond_atom_site_label_2
 _geom_bond_distance
 _geom_bond_site_symmetry_2
 _geom_bond_publ_flag
Fe1 O1 1.882(3) . ?
Fe1 O1 1.882(3) 2_556 ?
Fe1 N1 2.097(3) 2_556 ?
Fe1 N1 2.097(3) . ?
Fe1 N3 2.112(3) 2_556 ?
Fe1 N3 2.112(3) . ?
Cl1 C10 1.733(4) . ?
Cl2 C16 1.728(4) . ?
Cl3 C17 1.734(4) . ?
O1 C13 1.313(4) . ?
O2 N4 1.198(5) . ?
O3 N4 1.217(4) . ?
O4 C14 1.220(4) . ?
O5 C14 1.273(5) . ?
O5 H11 1.233(5) . ?
N1 C1 1.328(5) . ?
N1 C5 1.359(5) . ?
N2 C1 1.375(5) . ?
N2 N3 1.384(4) . ?
N2 H5 0.77(4) . ?
N3 C6 1.299(5) . ?
N4 C12 1.462(5) . ?
C1 C2 1.393(5) . ?
C2 C3 1.370(6) . ?
C2 H1 0.9500 . ?
C3 C4 1.393(7) . ?
C3 H2 0.9500 . ?
C4 C5 1.357(6) . ?
C4 H3 0.9500 . ?
C5 H4 0.9500 . ?
C6 C8 1.477(5) . ?
C6 C7 1.497(5) . ?
C7 H6B 0.9800 . ?
C7 H7A 0.9800 . ?
C7 H8C 0.9800 . ?
C8 C9 1.394(5) . ?
C8 C13 1.422(5) . ?
C9 C10 1.378(6) . ?
C9 H9 0.9500 . ?
C10 C11 1.369(6) . ?
C11 C12 1.380(6) . ?
C11 H10 0.9500 . ?
C12 C13 1.403(5) . ?
C14 C15 1.518(5) . ?
C15 C17 1.382(5) . ?
C15 C16 1.391(5) . ?
C16 C17 1.397(5) 5_656 ?
C17 C16 1.397(5) 5_656 ?

loop_
 _geom_angle_atom_site_label_1
 _geom_angle_atom_site_label_2
 _geom_angle_atom_site_label_3
 _geom_angle
 _geom_angle_site_symmetry_1
 _geom_angle_site_symmetry_3
 _geom_angle_publ_flag
O1 Fe1 O1 98.86(19) . 2_556 ?
O1 Fe1 N1 90.30(13) . 2_556 ?
O1 Fe1 N1 159.81(12) 2_556 2_556 ?
O1 Fe1 N1 159.81(12) . . ?
O1 Fe1 N1 90.30(13) 2_556 . ?
N1 Fe1 N1 86.97(17) 2_556 . ?
O1 Fe1 N3 102.71(12) . 2_556 ?
O1 Fe1 N3 84.75(12) 2_556 2_556 ?
N1 Fe1 N3 75.66(12) 2_556 2_556 ?
N1 Fe1 N3 95.98(12) . 2_556 ?
O1 Fe1 N3 84.75(12) . . ?
O1 Fe1 N3 102.71(12) 2_556 . ?
N1 Fe1 N3 95.98(12) 2_556 . ?
N1 Fe1 N3 75.66(12) . . ?
N3 Fe1 N3 168.66(16) 2_556 . ?
C13 O1 Fe1 124.9(3) . . ?
C14 O5 H11 123(4) . . ?
C1 N1 C5 118.3(3) . . ?
C1 N1 Fe1 115.7(3) . . ?
C5 N1 Fe1 126.0(3) . . ?
C1 N2 N3 115.8(3) . . ?
C1 N2 H5 117(3) . . ?
N3 N2 H5 118(3) . . ?
C6 N3 N2 119.6(3) . . ?
C6 N3 Fe1 128.3(2) . . ?
N2 N3 Fe1 111.5(2) . . ?
O2 N4 O3 121.9(4) . . ?
O2 N4 C12 120.0(4) . . ?
O3 N4 C12 118.0(4) . . ?
N1 C1 N2 116.1(3) . . ?
N1 C1 C2 122.4(4) . . ?
N2 C1 C2 121.5(4) . . ?
C3 C2 C1 118.0(4) . . ?
C3 C2 H1 121.0 . . ?
C1 C2 H1 121.0 . . ?
C2 C3 C4 120.6(4) . . ?
C2 C3 H2 119.7 . . ?
C4 C3 H2 119.7 . . ?
C5 C4 C3 117.6(4) . . ?
C5 C4 H3 121.2 . . ?
C3 C4 H3 121.2 . . ?
C4 C5 N1 123.2(4) . . ?
C4 C5 H4 118.4 . . ?
N1 C5 H4 118.4 . . ?
N3 C6 C8 118.7(3) . . ?
N3 C6 C7 121.2(3) . . ?
C8 C6 C7 120.0(3) . . ?
C6 C7 H6B 109.5 . . ?
C6 C7 H7A 109.5 . . ?
H6B C7 H7A 109.5 . . ?
C6 C7 H8C 109.5 . . ?
H6B C7 H8C 109.5 . . ?
H7A C7 H8C 109.5 . . ?
C9 C8 C13 118.8(3) . . ?
C9 C8 C6 119.4(3) . . ?
C13 C8 C6 121.8(3) . . ?
C10 C9 C8 121.5(4) . . ?
C10 C9 H9 119.3 . . ?
C8 C9 H9 119.3 . . ?
C11 C10 C9 120.9(4) . . ?
C11 C10 Cl1 119.2(3) . . ?
C9 C10 Cl1 119.9(4) . . ?
C10 C11 C12 118.6(4) . . ?
C10 C11 H10 120.7 . . ?
C12 C11 H10 120.7 . . ?
C11 C12 C13 123.0(4) . . ?
C11 C12 N4 116.7(3) . . ?
C13 C12 N4 120.3(4) . . ?
O1 C13 C12 120.7(4) . . ?
O1 C13 C8 121.9(3) . . ?
C12 C13 C8 117.3(4) . . ?
O4 C14 O5 125.0(4) . . ?
O4 C14 C15 117.6(3) . . ?
O5 C14 C15 117.4(3) . . ?
C17 C15 C16 118.4(3) . . ?
C17 C15 C14 120.6(3) . . ?
C16 C15 C14 120.8(3) . . ?
C15 C16 C17 120.9(3) . 5_656 ?
C15 C16 Cl2 118.5(3) . . ?
C17 C16 Cl2 120.6(3) 5_656 . ?
C15 C17 C16 120.7(3) . 5_656 ?
C15 C17 Cl3 119.5(3) . . ?
C16 C17 Cl3 119.7(3) 5_656 . ?

loop_
 _geom_torsion_atom_site_label_1
 _geom_torsion_atom_site_label_2
 _geom_torsion_atom_site_label_3
 _geom_torsion_atom_site_label_4
 _geom_torsion
 _geom_torsion_site_symmetry_1
 _geom_torsion_site_symmetry_2
 _geom_torsion_site_symmetry_3
 _geom_torsion_site_symmetry_4
 _geom_torsion_publ_flag
O1 Fe1 O1 C13 -56.7(3) 2_556 . . . ?
N1 Fe1 O1 C13 141.4(3) 2_556 . . . ?
N1 Fe1 O1 C13 59.4(5) . . . . ?
N3 Fe1 O1 C13 -143.2(3) 2_556 . . . ?
N3 Fe1 O1 C13 45.4(3) . . . . ?
C1 N2 N3 C6 -163.4(3) . . . . ?
C1 N2 N3 Fe1 24.7(4) . . . . ?
C5 N1 C1 N2 178.5(4) . . . . ?
Fe1 N1 C1 N2 -3.2(4) . . . . ?
C5 N1 C1 C2 -1.5(6) . . . . ?
Fe1 N1 C1 C2 176.8(3) . . . . ?
N3 N2 C1 N1 -14.7(5) . . . . ?
N3 N2 C1 C2 165.3(4) . . . . ?
N1 C1 C2 C3 0.9(7) . . . . ?
N2 C1 C2 C3 -179.1(4) . . . . ?
C1 C2 C3 C4 0.9(7) . . . . ?
C2 C3 C4 C5 -2.1(8) . . . . ?
C3 C4 C5 N1 1.6(7) . . . . ?
C1 N1 C5 C4 0.2(7) . . . . ?
Fe1 N1 C5 C4 -177.9(4) . . . . ?
N2 N3 C6 C8 177.0(3) . . . . ?
Fe1 N3 C6 C8 -12.6(5) . . . . ?
N2 N3 C6 C7 -1.8(5) . . . . ?
Fe1 N3 C6 C7 168.6(3) . . . . ?
N3 C6 C8 C9 -155.6(4) . . . . ?
C7 C6 C8 C9 23.2(5) . . . . ?
N3 C6 C8 C13 23.8(5) . . . . ?
C7 C6 C8 C13 -157.5(4) . . . . ?
C13 C8 C9 C10 -0.8(6) . . . . ?
C6 C8 C9 C10 178.6(4) . . . . ?
C8 C9 C10 C11 -0.5(6) . . . . ?
C8 C9 C10 Cl1 179.5(3) . . . . ?
C9 C10 C11 C12 1.4(6) . . . . ?
Cl1 C10 C11 C12 -178.5(3) . . . . ?
C10 C11 C12 C13 -1.1(6) . . . . ?
C10 C11 C12 N4 -179.8(4) . . . . ?
O2 N4 C12 C11 153.4(5) . . . . ?
O3 N4 C12 C11 -27.5(6) . . . . ?
O2 N4 C12 C13 -25.4(7) . . . . ?
O3 N4 C12 C13 153.7(4) . . . . ?
Fe1 O1 C13 C12 135.5(3) . . . . ?
Fe1 O1 C13 C8 -48.6(5) . . . . ?
C11 C12 C13 O1 176.0(4) . . . . ?
N4 C12 C13 O1 -5.3(6) . . . . ?
C11 C12 C13 C8 -0.1(6) . . . . ?
N4 C12 C13 C8 178.6(4) . . . . ?
C9 C8 C13 O1 -175.1(4) . . . . ?
C6 C8 C13 O1 5.6(6) . . . . ?
C9 C8 C13 C12 1.0(6) . . . . ?
C6 C8 C13 C12 -178.4(4) . . . . ?
O4 C14 C15 C17 76.6(5) . . . . ?
O5 C14 C15 C17 -103.6(4) . . . . ?
O4 C14 C15 C16 -98.1(4) . . . . ?
O5 C14 C15 C16 81.7(5) . . . . ?
C17 C15 C16 C17 -0.9(6) . . . 5_656 ?
C14 C15 C16 C17 173.9(3) . . . 5_656 ?
C17 C15 C16 Cl2 179.6(3) . . . . ?
C14 C15 C16 Cl2 -5.6(5) . . . . ?
C16 C15 C17 C16 0.9(6) . . . 5_656 ?
C14 C15 C17 C16 -173.9(3) . . . 5_656 ?
C16 C15 C17 Cl3 -177.9(3) . . . . ?
C14 C15 C17 Cl3 7.3(5) . . . . ?

#==============================================================================
loop_
_geom_hbond_atom_site_label_D
_geom_hbond_atom_site_label_H
_geom_hbond_atom_site_label_A
_geom_hbond_site_symmetry_D
_geom_hbond_site_symmetry_H
_geom_hbond_site_symmetry_A
_geom_hbond_distance_DA
_geom_hbond_distance_DH
_geom_hbond_distance_HA
_geom_hbond_angle_DHA
_geom_hbond_publ_flag
N2 H5 O4 . . . 2.890(5) 0.77(4) 2.17(4) 157(4) no
N2 H5 N3 . . . 1.384(4) 0.77(4) 1.87(4) 41(2) no

#==============================================================================
# Additional structures and associated data_? identifiers
# should be added at this point if there is more than one 
# structure analysis in the CIF.

_shelx_res_file
;

    shelxl.res created by SHELXL-2014/7

TITL fr1374
CELL  0.71075 12.66450 31.28690 9.56860 90.00000 97.32640 90.00000
ZERR  4 0.00260 0.00610 0.00200 0.00000 0.00560 0.00000
LATT 7
SYMM    -X,    +Y, .50-Z
SFAC C H N O FE CL
UNIT 136 84 32 40 4 24
L.S. 10
FMAP 2
PLAN 25
WPDB -2
HTAB
BOND $H
CONF
LIST 4
TEMP -149.8
ACTA
SIZE 0.200 0.200 0.200
WGHT    0.043500    8.008101
FVAR       0.58129
FE1   5    0.000000    0.160081    0.750000    10.50000    0.03135    0.04054 =
         0.04303    0.00000    0.01329    0.00000
CL1   6    0.367186    0.332776    0.719522    11.00000    0.07393    0.06584 =
         0.09129    0.01145    0.00526   -0.02950
CL2   6    0.555407    0.094365    0.579645    11.00000    0.06191    0.04053 =
         0.06256   -0.00840    0.00427   -0.00033
CL3   6    0.315546   -0.019578    0.260690    11.00000    0.04951    0.06135 =
         0.05382   -0.00361   -0.00807   -0.00134
O1    4    0.079798    0.199203    0.870004    11.00000    0.05678    0.05263 =
         0.05562   -0.01010    0.02480   -0.01081
O2    4   -0.020370    0.263032    0.972723    11.00000    0.08404    0.11645 =
         0.16233   -0.08137    0.06913   -0.02758
O3    4    0.084167    0.311389    1.060413    11.00000    0.08956    0.06852 =
         0.07586   -0.02909    0.00838    0.01097
O4    4    0.286194    0.075703    0.410312    11.00000    0.04485    0.06621 =
         0.06691    0.00052    0.02170    0.01591
O5    4    0.405450    0.091507    0.268531    11.00000    0.05748    0.06093 =
         0.06132    0.01992    0.01559    0.01368
N1    3   -0.035011    0.111444    0.600427    11.00000    0.03830    0.04438 =
         0.04541   -0.00277    0.00845   -0.00380
N2    3    0.144527    0.114406    0.587873    11.00000    0.03642    0.04507 =
         0.05487   -0.00939    0.01727    0.00138
N3    3    0.140943    0.153407    0.655345    11.00000    0.03930    0.03715 =
         0.04338   -0.00202    0.01364    0.00011
N4    3    0.061726    0.282339    0.977265    11.00000    0.05481    0.05365 =
         0.06340   -0.01680    0.00720    0.00308
C1    1    0.047691    0.095540    0.545336    11.00000    0.03973    0.04133 =
         0.04324    0.00003    0.01261   -0.00072
C2    1    0.037761    0.061724    0.449913    11.00000    0.06599    0.05707 =
         0.06287   -0.01832    0.02261   -0.01008
AFIX  43
H1    2    0.098138    0.050545    0.412787    11.00000   -1.20000
AFIX   0
C3    1   -0.061718    0.045070    0.411209    11.00000    0.08201    0.07340 =
         0.05753   -0.02279    0.01701   -0.02857
AFIX  43
H2    2   -0.070590    0.021711    0.347358    11.00000   -1.20000
AFIX   0
C4    1   -0.149947    0.062089    0.464663    11.00000    0.06189    0.08573 =
         0.06334   -0.01679    0.01346   -0.02662
AFIX  43
H3    2   -0.219564    0.051400    0.436076    11.00000   -1.20000
AFIX   0
C5    1   -0.132840    0.094496    0.559066    11.00000    0.04888    0.06776 =
         0.05400   -0.00943    0.00894   -0.00920
AFIX  43
H4    2   -0.192122    0.105896    0.598163    11.00000   -1.20000
AFIX   0
C6    1    0.224158    0.178064    0.668367    11.00000    0.03632    0.04122 =
         0.03855    0.00259    0.00928    0.00072
C7    1    0.325289    0.164571    0.615304    11.00000    0.03555    0.06150 =
         0.05328   -0.00897    0.01360   -0.00128
AFIX 137
H6B   2    0.341362    0.134876    0.642858    11.00000   -1.20000
H7A   2    0.383672    0.183089    0.655970    11.00000   -1.20000
H8C   2    0.317021    0.166917    0.512356    11.00000   -1.20000
AFIX   0
C8    1    0.216914    0.220443    0.734413    11.00000    0.03510    0.04187 =
         0.04479    0.00208    0.00366   -0.00045
C9    1    0.285240    0.253030    0.703188    11.00000    0.03809    0.05139 =
         0.04859    0.00596    0.00266   -0.00245
AFIX  43
H9    2    0.336587    0.247331    0.641381    11.00000   -1.20000
AFIX   0
C10   1    0.279938    0.293315    0.759987    11.00000    0.04423    0.04672 =
         0.06189    0.00579   -0.00545   -0.00826
C11   1    0.206481    0.302789    0.848658    11.00000    0.05424    0.04258 =
         0.05882   -0.00458   -0.00195    0.00044
AFIX  43
H10   2    0.201983    0.330765    0.886038    11.00000   -1.20000
AFIX   0
C12   1    0.139103    0.270807    0.882558    11.00000    0.04146    0.04242 =
         0.05279   -0.00818    0.00639    0.00346
C13   1    0.141238    0.229177    0.828360    11.00000    0.03858    0.04789 =
         0.04368   -0.00205    0.00326   -0.00147
C14   1    0.370971    0.069722    0.365526    11.00000    0.04363    0.03982 =
         0.04329   -0.00227    0.00796    0.00634
C15   1    0.440896    0.033665    0.430670    11.00000    0.03501    0.04199 =
         0.03826    0.00151    0.01267    0.00519
C16   1    0.524909    0.041827    0.535668    11.00000    0.03953    0.03915 =
         0.04004   -0.00427    0.01312    0.00029
C17   1    0.417068   -0.008370    0.395089    11.00000    0.03205    0.04556 =
         0.04056   -0.00427    0.01066    0.00004
H5    2    0.188578    0.110945    0.540517    11.00000    0.04664
H11   2    0.500000    0.092490    0.250000    10.50000    0.21523
HKLF 4

REM  fr1374
REM R1 =  0.0659 for    3274 Fo > 4sig(Fo)  and  0.0921 for all    4272 data
REM    274 parameters refined using      0 restraints

END

WGHT      0.0435      7.9906

REM Instructions for potential hydrogen bonds
HTAB C2 O4
EQIV $1 x+1/2, -y+1/2, z-1/2
HTAB C9 O2_$1
HTAB N2 O4
EQIV $2 -x+1, y, -z+1/2
HTAB O5 O5_$2

REM Highest difference peak  0.401,  deepest hole -0.336,  1-sigma level  0.070
Q1    1   0.4118  0.3121  0.6837  11.00000  0.05    0.40
Q2    1   0.4232  0.3136  0.7871  11.00000  0.05    0.30
Q3    1   0.0356  0.2655  1.0686  11.00000  0.05    0.28
Q4    1   0.0000  0.0231  0.2500  10.50000  0.05    0.27
Q5    1   0.0777  0.1579  0.6657  11.00000  0.05    0.26
Q6    1   0.0266  0.2003  0.8861  11.00000  0.05    0.25
Q7    1   0.4882  0.1589  0.7786  11.00000  0.05    0.25
Q8    1   0.5000  0.1536  0.7500  10.50000  0.05    0.25
Q9    1   0.3622  0.2211  0.6102  11.00000  0.05    0.23
Q10   1  -0.0100  0.2898  0.8942  11.00000  0.05    0.23
Q11   1   0.0339  0.3229  0.9621  11.00000  0.05    0.23
Q12   1   0.0372  0.0611  0.3849  11.00000  0.05    0.23
Q13   1   0.3964 -0.0115  0.1822  11.00000  0.05    0.23
Q14   1  -0.3709  0.0483  0.3806  11.00000  0.05    0.23
Q15   1  -0.1294  0.0736  0.4063  11.00000  0.05    0.22
Q16   1  -0.0838  0.1111  0.5737  11.00000  0.05    0.22
Q17   1   0.0440  0.2022  0.7882  11.00000  0.05    0.22
Q18   1   0.1006  0.3609  0.9053  11.00000  0.05    0.22
Q19   1   0.1055  0.1717  0.7904  11.00000  0.05    0.22
Q20   1   0.1443  0.1371  0.6299  11.00000  0.05    0.22
Q21   1   0.5000 -0.0123  0.2500  10.50000  0.05    0.22
Q22   1  -0.0232  0.0725  0.4175  11.00000  0.05    0.22
Q23   1   0.1574  0.3098  0.9773  11.00000  0.05    0.22
Q24   1   0.0203  0.3214  0.9117  11.00000  0.05    0.22
Q25   1   0.2172  0.1110  0.4561  11.00000  0.05    0.21
;

_shelx_res_checksum   60621

_shelx_hkl_file
;
   0   0  -2 1623.47  108.39
   0   0   2 1557.28   98.24
   0   0   2 1423.32   86.28
   0   0  -2 1470.18   89.17
   0   0  -3    8.91   26.68
   0   0   3   32.40   23.46
   0   0   3   10.73   15.95
   0   0  -3   10.44   15.29
   0   0  -4 1178.34   63.25
   0   0   4 1076.37   81.10
   0   0   4 1167.74   45.52
   0   0  -4 1205.21   96.30
   0   0  -5   47.05   36.58
   0   0   5   39.97   26.85
   0   0   5    7.81   15.15
   0   0  -616466.55  918.65
   0   0   617453.89  178.80
   0   0   617056.47  117.73
   0   0  -7   50.19   28.32
   0   0   7   26.22   17.16
   0   0  -8  423.03  139.20
   0   0   8  776.09   75.36
   0   0  -9   -1.52   23.78
   0   0   9   32.42   14.38
   0   0 -10  621.90   95.17
   0   0  10  463.35  129.37
   0   0  11    1.67    9.74
   0   0 -12  105.25   53.37
   0   2   210883.50  268.56
   0   2   211131.68  261.16
   0   2  -210923.21  265.75
   0   2  -210534.66  250.28
   0  -2   210422.79  247.93
   0  -2  -210440.79  259.58
   0  -2  -210314.95  242.20
   0  -2   2 9333.00  225.49
   0   2   310843.56  256.90
   0   2  -310615.01  265.25
   0   2   310266.64  259.00
   0   2  -310706.32  257.42
   0  -2  -310667.48  273.91
   0  -2   310335.51  250.50
   0  -2  -310473.85  249.57
   0  -2   311613.89  286.35
   0   2   4   13.70   12.26
   0   2  -4   -1.43   26.22
   0   2   4  -11.25   20.84
   0   2  -4    5.51   12.77
   0  -2   4   31.25   14.03
   0  -2   4   59.75   22.50
   0  -2  -4   61.88   30.70
   0  -2  -4   10.99    9.84
   0   2  -5  247.85   32.91
   0   2   5  376.73   31.04
   0   2  -5  294.52   28.57
   0   2   5  387.10   43.58
   0  -2   5  369.60   62.67
   0  -2  -5  482.85  117.55
   0  -2   5  462.95   83.45
   0  -2  -5  388.22   36.66
   0   2  -6 3975.56  238.99
   0   2   6 3981.93  223.70
   0   2   6 3771.16  225.58
   0  -2   6 3354.22  196.88
   0  -2   6 3863.25  220.52
   0  -2  -6 4069.66  272.13
   0   2  -7  370.96   57.51
   0   2   7  386.22   48.80
   0  -2  -7  452.82   74.94
   0  -2   7  334.05   47.60
   0  -2   7  342.18   40.65
   0   2   8   60.32   14.74
   0   2  -8  103.53   32.80
   0  -2  -8   55.13   37.66
   0  -2   8   60.83   22.87
   0   2  -9   30.53   39.48
   0   2   9   -5.29   12.87
   0  -2  -9    0.27   34.85
   0  -2   9   14.20   14.16
   0   2 -10   12.33   40.60
   0   2  10   30.73   13.73
   0  -2  10    8.57   14.29
   0   2 -11  204.18   68.69
   0   2  11  184.87   63.20
   0  -2  11  200.51   73.17
   0   2 -12   73.07   56.46
   0   2  12    9.89    6.97
   0  -2 -12   41.95   50.08
   0   4  -1 2493.54   64.49
   0   4   1 2562.94   78.16
   0   4  -1 2487.00   63.69
   0   4   1 2681.39   67.25
   0  -4  -1 2485.07   74.27
   0  -4   1 2504.19   65.70
   0   4   2  650.71   40.06
   0   4   2  672.89   50.70
   0   4  -2  592.02   41.56
   0   4  -2  672.44   46.86
   0  -4   2  707.58   47.95
   0  -4  -2  710.73   43.53
   0  -4  -2  634.63   54.20
   0  -4   2  667.08   48.26
   0   4   3 1795.35  108.50
   0   4   3 2100.02   77.71
   0   4  -3 2051.83   69.23
   0   4  -3 2011.66   84.44
   0  -4  -3 1824.13  122.65
   0  -4   3 1843.38  124.65
   0  -4  -3 1832.74  110.25
   0  -4   3 1833.16  114.61
   0   4   4 1759.07   55.89
   0   4  -4 1781.52   72.37
   0   4   4 1630.00   70.76
   0   4  -4 1613.73   57.66
   0  -4   4 1677.14   63.25
   0  -4   4 1774.38   65.02
   0  -4  -4 1857.68   80.79
   0  -4  -4 1932.03   62.38
   0   4   5  851.96   65.44
   0   4   5  906.08   55.98
   0   4  -5 1051.28   71.17
   0  -4   5  877.65  156.16
   0  -4  -5  995.17   74.42
   0  -4   5  927.47   47.85
   0  -4  -5  881.81   61.56
   0   4  -6 1038.31   77.09
   0   4   6  959.73   73.35
   0   4   6 1090.86   71.40
   0  -4  -6  950.70   81.37
   0  -4   6  900.15   69.91
   0  -4   6 1119.72   94.73
   0   4   7   62.03   19.77
   0   4  -7   86.32   38.39
   0  -4  -7   70.49   55.76
   0  -4   7   67.64   20.48
   0   4  -8  285.06   64.63
   0   4   8  210.53   35.91
   0  -4  -8  146.98   41.66
   0  -4   8  242.67   41.93
   0   4  -9  126.30   44.42
   0   4   9  122.44   19.92
   0  -4  -9  168.67   60.12
   0  -4   9  115.28   45.19
   0   4 -10    1.96   41.14
   0  -4 -10   -2.05   42.93
   0  -4  10   20.39   24.59
   0   4 -11  192.09   50.82
   0   4  11   34.62   16.75
   0  -4 -11   45.79   40.77
   0  -4  11   54.98   19.41
   0   4 -12   40.78   28.66
   0  -4 -12   19.09   51.04
   0  -4  12   17.77   14.85
   0   6   0 1146.88   69.61
   0  -6   0 1112.06   67.34
   0   6   1 1915.07  123.24
   0   6  -1 1637.06   98.24
   0   6   1 1866.18  114.39
   0  -6  -1 2100.24   74.62
   0  -6   1 1924.90   74.62
   0  -6  -1 1773.43  109.51
   0  -6   1 1957.49   80.18
   0   6  -248989.83 1837.89
   0   6   242003.49  990.47
   0   6  -243538.37 1014.20
   0  -6  -243400.51 1024.14
   0  -6  -242557.39  982.97
   0  -6   246416.38 1739.15
   0   6   320470.75  500.17
   0   6   320609.17  478.81
   0   6  -318243.70  435.05
   0   6  -320648.71  489.32
   0  -6  -319640.97  483.75
   0  -6   319185.45  455.84
   0  -6  -320373.62  474.06
   0   6   4 2926.91   86.81
   0   6   4 3030.18  114.36
   0   6  -4 3074.22  109.43
   0  -6   4 3236.99  105.41
   0  -6  -4 3077.60  123.50
   0  -6   4 2746.18  111.57
   0  -6  -4 2883.12   86.69
   0   6   5  467.40   42.55
   0   6  -5  508.85   49.41
   0   6   5  373.30   41.40
   0  -6   5  480.92   90.70
   0  -6  -5  561.04   67.66
   0  -6   5  383.55   34.05
   0  -6  -5  522.41   51.19
   0   6  -6   27.15   23.54
   0   6   6   77.74   32.19
   0   6   6   10.50    6.92
   0  -6  -6  137.31   57.71
   0  -6   6   53.98   29.86
   0   6  -7   11.82   29.89
   0   6   7    9.02    7.54
   0  -6  -7  -21.55   39.81
   0  -6   7   17.72   26.36
   0   6  -8 1531.07  139.79
   0   6   8 1647.11  124.63
   0  -6  -8 1656.79  156.50
   0  -6   8 1579.87  126.15
   0   6   9  136.94   31.66
   0   6  -9  101.31   43.54
   0  -6  -9  149.92   49.15
   0  -6   9  214.04   40.26
   0   6  10  212.47   61.81
   0   6 -10  404.18  102.08
   0  -6 -10  351.41   70.05
   0  -6  10  284.99   35.23
   0   6 -11   29.12   43.10
   0  -6 -11   -1.99   51.26
   0  -6  11   -3.79   16.44
   0  -6 -12  159.48   58.91
   0   8   011054.05  270.39
   0   8   0 9759.66  230.65
   0  -8   010186.12  241.60
   0   8   1 3324.87   99.91
   0   8  -1 3458.68   84.52
   0  -8  -1 3458.24  109.40
   0  -8   1 3397.58   84.12
   0  -8  -1 3530.61   97.45
   0  -8   1 3498.91   92.04
   0   8   2  534.09   39.29
   0   8   2  462.44   41.37
   0   8  -2  415.19   30.85
   0  -8   2  436.05   34.70
   0  -8  -2  310.91   42.13
   0  -8  -2  502.07   30.73
   0  -8   2  510.94   39.61
   0   8  -315485.39  443.16
   0   8   315488.09  458.09
   0  -8  -313874.33  415.44
   0  -8   315990.15  452.45
   0  -8   315038.51  431.22
   0  -8  -315765.21  441.36
   0   8   4  220.31   16.93
   0   8   4  203.69   30.26
   0   8  -4  206.48   32.66
   0  -8   4  180.52   29.12
   0  -8  -4  302.37   59.15
   0  -8   4  274.21   24.58
   0  -8  -4  183.32   26.39
   0   8   5   63.26   14.97
   0   8   5   75.01   33.15
   0   8  -5   59.58   28.76
   0  -8   5   61.08   16.70
   0  -8  -5   54.45   27.37
   0  -8   5   81.79   33.16
   0  -8  -5   55.55    8.64
   0   8   6   52.11   12.41
   0   8  -6   40.48   22.07
   0  -8  -6   55.45   41.35
   0  -8   6   34.88   26.42
   0   8  -7  651.45   47.42
   0   8   7  718.53   47.85
   0  -8  -7  800.27   81.55
   0  -8   7  590.07  160.59
   0  -8   7  784.84   90.08
   0   8   8   18.95    8.56
   0   8  -8  -24.46   30.96
   0  -8  -8   28.54   36.00
   0  -8   8   41.31   17.21
   0   8   9 2512.94   45.72
   0   8  -9 2474.22  284.27
   0  -8  -9 2257.57  274.54
   0  -8   9 2657.28   69.64
   0   8 -10   97.88   43.90
   0  -8 -10  114.82   72.15
   0  -8  10   95.10   46.22
   0   8 -11   15.99   37.82
   0  -8 -11   77.29   54.66
   0  -8  11    8.08   17.98
   0   8 -12   -4.06   43.78
   0  -8 -12  167.84   90.07
   0  -8  12   26.38   20.58
   0  10   0 3494.43  101.29
   0  10   0 3519.22   88.64
   0 -10   0 3409.81  110.16
   0 -10   0 3452.04   88.61
   0  10  -1 8372.87  198.85
   0 -10  -1 8147.34  213.23
   0 -10   1 8360.08  200.43
   0 -10   1 8033.43  197.17
   0  10  -2 1437.75   88.49
   0  10   2 1340.00   94.76
   0 -10  -2 1241.18   89.37
   0 -10   2 1405.34   85.12
   0 -10  -2 1421.20   85.76
   0 -10   2 1176.28   77.57
   0  10   3 3821.31  112.05
   0  10   3 4275.38  148.99
   0  10  -3 4772.55  154.59
   0 -10   3 3834.85  112.67
   0 -10  -3 4366.81  155.00
   0 -10  -3 4246.83  120.01
   0 -10   3 4216.47  134.99
   0  10   4 3084.42  130.45
   0  10   4 2015.02  110.47
   0  10  -4 2119.09  100.57
   0 -10   4 2666.54  118.44
   0 -10  -4 2582.31  136.37
   0 -10   4 2599.83  120.51
   0 -10  -4 2452.41  102.69
   0  10   5  313.90   31.89
   0  10   5  290.31   35.72
   0  10  -5  380.96   41.22
   0 -10   5  309.66   36.67
   0 -10  -5  458.97   49.67
   0 -10   5  350.39   48.96
   0 -10  -5  281.49   14.63
   0  10  -6 1551.94   80.13
   0  10   6 1463.63   53.82
   0 -10  -6 1354.01   94.13
   0 -10   6 1140.19   54.29
   0 -10   6 1541.68   71.96
   0  10  -7  348.70   56.42
   0  10   7  415.43   43.95
   0 -10  -7  500.25   84.76
   0 -10   7  321.65   38.01
   0 -10   7  501.69   98.07
   0  10   8   84.00   26.07
   0  10  -8   97.96   38.51
   0 -10  -8  208.49   72.28
   0 -10   8   91.92   37.08
   0  10   9   14.14    5.19
   0  10  -9   45.22   35.10
   0 -10  -9   41.32   46.96
   0 -10   9   46.99   20.96
   0  10  10   18.68    9.91
   0  10 -10   45.30   34.35
   0 -10 -10  209.45   76.40
   0 -10  10   49.64   21.92
   0  10 -11  -24.79   41.28
   0 -10 -11  -48.43   57.17
   0 -10  11   25.73   17.03
   0  12   015323.60  376.43
   0  12   015565.80  367.16
   0 -12   015116.42  382.79
   0 -12   015454.99  367.70
   0  12   1 5259.53  150.03
   0  12  -1 5364.02  133.75
   0  12   1 5448.97  136.49
   0 -12   1 5468.55  136.68
   0 -12  -1 5534.85  155.63
   0 -12   1 5317.43  136.02
   0 -12  -1 5303.99  129.95
   0  12   2 7734.04  242.60
   0 -12  -2 7932.20  253.39
   0 -12   2 7449.22  213.59
   0 -12   2 7483.35  221.81
   0  12   317353.53  515.58
   0 -12  -318817.97  558.80
   0 -12   318910.15  534.85
   0 -12  -318359.51  512.37
   0 -12   319210.33  551.52
   0  12   4  863.25   39.71
   0  12   4  946.41   68.65
   0  12  -4  955.42   51.72
   0 -12   4  861.99   43.73
   0 -12  -4 1152.11   79.41
   0 -12   4  690.98   72.90
   0 -12  -4  962.80   38.62
   0  12  -5 3767.99  219.68
   0  12   5 3396.93  188.21
   0 -12  -5 3375.53  215.40
   0 -12   5 3408.06  191.86
   0 -12   5 3389.09  198.29
   0  12   6  921.45   56.39
   0  12  -6  989.91   77.42
   0 -12  -6 1083.18   94.54
   0 -12   6 1111.42  117.99
   0  12  -7  148.92   33.22
   0  12   7  237.39   33.78
   0 -12  -7  192.66   52.49
   0 -12   7  213.63   53.39
   0 -12   7  295.91   60.27
   0  12   8   46.19   12.10
   0  12  -8   80.00   32.82
   0  12   8   18.65   16.20
   0 -12   8   50.62   15.99
   0 -12  -8   11.06   49.12
   0 -12   8  123.01   28.52
   0  12   9    6.72    4.73
   0  12  -9   72.00   35.86
   0 -12  -9   61.68   37.57
   0 -12   9   17.82   20.51
   0  12 -10   50.47   33.59
   0 -12 -10   41.09   41.45
   0 -12  10   27.78   26.47
   0  12 -11   97.07   58.09
   0 -12 -11   63.48   55.20
   0 -12  11   27.89   18.59
   0  14   0 4047.92  143.71
   0  14   0 4190.24  124.92
   0 -14   0 4062.90  148.68
   0 -14   0 4449.49  134.23
   0  14   1 5614.58  255.03
   0  14  -1 5711.11  170.08
   0  14   1 5378.40  159.90
   0 -14   1 5545.13  161.53
   0 -14  -1 5779.34  186.84
   0 -14  -1 5353.00  156.57
   0 -14   1 5350.72  161.53
   0  14  -2  417.62   24.46
   0  14   2  495.32   73.96
   0 -14  -2  466.02  121.06
   0 -14   2  495.51   36.18
   0 -14  -2  608.33   64.80
   0 -14  -2  433.15   20.98
   0 -14   2  440.44   31.52
   0  14  -3  208.60   39.45
   0  14   3  243.46   41.90
   0 -14  -3  278.71   60.35
   0 -14   3  173.66   15.70
   0 -14  -3  168.90   13.34
   0 -14   3  183.45   37.71
   0 -14  -3  188.65   20.52
   0  14  -4  132.76   28.35
   0  14   4  103.59   29.08
   0 -14  -4  144.33   53.35
   0 -14   4  144.47   29.75
   0 -14   4  193.55   34.90
   0  14  -5 1340.08   62.29
   0 -14  -5 1474.27   98.06
   0 -14   5 1278.53   53.44
   0 -14   5 1321.51   66.45
   0  14   6  320.29   61.18
   0  14  -6  346.30   84.84
   0  14   6  238.79   55.00
   0 -14   6  247.24   60.61
   0 -14  -6  210.48   45.93
   0 -14   6  282.66   43.76
   0  14   7  474.50   63.62
   0  14  -7  466.23   67.94
   0  14   7  263.28   76.88
   0 -14   7  306.22   92.87
   0 -14  -7  519.63   93.15
   0 -14   7  583.90   87.37
   0  14   8  860.93   96.21
   0  14  -8  720.96   97.35
   0 -14  -8  782.27  116.23
   0 -14   8  885.58  107.00
   0  14  -9  121.47   40.98
   0 -14  -9  247.34   56.90
   0 -14   9  253.05   34.99
   0 -14 -10   60.75   47.47
   0 -14 -11  171.01   80.69
   0 -14  11  471.36   42.79
   0  16   013809.33  481.94
   0 -16   013109.77  561.86
   0 -16   014318.59  500.87
   0  16   1  176.10   30.60
   0  16  -1  162.60   16.98
   0  16   1  151.71   35.12
   0 -16   1  146.05   14.74
   0 -16   1   29.70   29.70
   0 -16  -1  176.41   27.31
   0 -16  -1  172.82   41.74
   0 -16   1  194.17   34.39
   0  16   2 2657.47  136.26
   0  16  -2 2693.40  116.51
   0  16   2 2644.75  117.12
   0 -16   2 2774.95  118.89
   0 -16  -2 2731.22  123.15
   0 -16   2 2777.96  126.79
   0 -16  -2 2816.22  119.50
   0  16  -3 1514.59   67.11
   0  16   3 1313.18   98.29
   0 -16  -3 1253.80  133.12
   0 -16   3 1480.13   66.56
   0 -16  -3 1416.22   56.23
   0 -16   3 1449.07   71.45
   0 -16  -3 1481.52   59.21
   0  16  -4 3663.55  209.54
   0 -16  -4 3485.98  224.83
   0 -16   4 3281.02  184.67
   0 -16   4 3187.41  186.56
   0  16  -5   93.11   28.28
   0 -16  -5   68.11   37.90
   0 -16   5   74.20   17.98
   0 -16   5   77.86   38.47
   0  16  -6 2970.92  188.25
   0 -16  -6 2128.40  159.18
   0 -16   6 2485.76  148.00
   0 -16   6 3009.12  189.32
   0  16  -7  143.25   42.54
   0 -16  -7  149.83   58.98
   0 -16   7  135.28   42.33
   0 -16   7  128.71   49.53
   0  16  -8  146.97   40.40
   0 -16  -8  157.53   57.47
   0 -16   8  217.46   46.01
   0  16  -9   47.28   32.66
   0 -16  -9   60.15   52.86
   0 -16   9  -18.26   24.78
   0 -16 -10  255.36   61.63
   0 -16  10  277.98   52.41
   0 -16 -11   41.86   32.86
   0 -16  11   43.57   14.60
   0  18   0 1801.02   92.04
   0  18   0 1835.42   78.96
   0 -18   0 1484.02  274.81
   0 -18   0 1782.87   87.86
   0  18  -1  143.16   22.19
   0  18   1  150.04   49.58
   0  18  -1  183.29   17.00
   0  18   1  175.08   19.52
   0 -18  -1  194.01   32.55
   0 -18   1  101.18   32.09
   0 -18  -1  170.70   32.37
   0 -18   1  158.61   17.23
   0  18   2  224.53   36.01
   0  18  -2  197.76   32.29
   0  18   2  230.50   20.21
   0 -18   2  192.94   15.24
   0 -18  -2  234.79   24.99
   0 -18   2  240.61   26.00
   0 -18  -2  241.25   40.67
   0  18  -3 4073.34  228.85
   0  18   3 3604.61  220.33
   0 -18  -3 3840.59  238.02
   0 -18   3 3939.38  221.79
   0 -18  -3 4802.55  264.52
   0 -18  -3 3603.08  198.41
   0 -18   3 3794.46  221.86
   0  18  -4  409.60   68.96
   0 -18  -4  258.69  115.57
   0 -18   4  296.81   30.72
   0 -18   4  330.32   42.59
   0  18  -5   54.95   17.69
   0 -18  -5   60.22   59.81
   0 -18   5   27.85    8.75
   0 -18   5   63.14   30.90
   0  18  -6   56.16   24.82
   0 -18  -6   64.88   37.63
   0 -18   6    2.55   24.57
   0  18  -7   59.50   44.86
   0 -18  -7   12.54   24.12
   0 -18   7  108.78   45.99
   0  18  -8  121.82   50.99
   0 -18  -8  118.38   75.97
   0 -18   8  149.42   31.03
   0  18  -9   66.02   34.09
   0 -18  -9    9.31   40.92
   0 -18   9   24.03   24.11
   0 -18 -10   32.27   33.90
   0 -18  10   56.82   26.05
   0 -18 -11   22.46   41.44
   0 -18  11    8.49   14.86
   0  20   0  111.62   24.90
   0  20   0  186.14   47.42
   0 -20   0  205.60   54.56
   0 -20   0  204.82   17.11
   0  20  -1  995.26   74.30
   0  20   1 1088.68   82.34
   0  20  -1  934.28   56.87
   0  20   1 1085.64   67.48
   0 -20  -1  823.02  130.47
   0 -20   1  947.45   62.77
   0 -20  -1  872.49   54.02
   0  20   2 1095.99   74.17
   0  20  -2 1043.92   42.48
   0  20   2 1088.51   47.45
   0 -20   2  971.40   43.24
   0 -20   2  811.55   98.45
   0 -20  -2 1036.73   97.98
   0 -20   2 1035.50  127.95
   0 -20  -2 1105.45   43.15
   0  20  -3 1419.34   58.42
   0  20   3 1465.83   64.57
   0 -20   3 1401.15   54.25
   0 -20  -3 1470.32   56.75
   0 -20   3 1566.81   72.84
   0 -20  -3 1290.36   48.25
   0  20  -4  256.28   59.12
   0 -20  -4  305.64  122.51
   0 -20   4  254.88   60.49
   0 -20   4  347.64   78.17
   0 -20  -5   32.46   26.72
   0 -20   5   27.64   12.82
   0 -20   5   46.78   12.79
   0  20  -6   -3.37   15.41
   0 -20  -6   92.68   46.25
   0 -20   6    7.92    7.17
   0 -20   6   -6.59   26.81
   0  20  -7 1666.35  190.62
   0 -20  -7 1524.48  190.66
   0 -20   7 1809.69  215.05
   0 -20  -8   -7.25   47.34
   0 -20   8   46.93   25.67
   0  20  -9   99.50   32.01
   0 -20  -9   48.50   32.73
   0 -20   9   47.31   37.54
   0 -20 -10   20.13   43.04
   0 -20  10   45.16   24.29
   0  22   0  934.50  134.35
   0  22   0 1098.36   46.41
   0 -22   0 1131.43  207.98
   0 -22   0 1061.21   48.47
   0  22   1 1318.43   77.43
   0  22  -1 1339.87  207.29
   0  22  -1 1662.61   62.88
   0  22   1 1548.46   67.56
   0 -22  -1 1643.18   89.35
   0 -22   1 1223.30  279.21
   0 -22  -1 1547.74   64.43
   0 -22   1 1745.95   73.03
   0  22  -2 4137.87  249.63
   0  22   2 4840.21  291.15
   0 -22   2 4204.73  282.94
   0 -22  -2 4144.65  254.87
   0 -22  -2 3899.08  233.70
   0 -22   2 5001.45  303.97
   0  22  -3  450.21   47.43
   0  22   3  328.49   37.77
   0 -22   3  410.80   41.92
   0 -22  -3  331.02   37.59
   0 -22   3  425.18   51.92
   0 -22  -3  376.61   39.17
   0  22  -4  473.89   67.97
   0 -22  -4  579.43   96.38
   0 -22   4  573.22   79.40
   0 -22   4  736.93   77.38
   0  22  -5  381.15   95.26
   0 -22  -5  330.31   99.07
   0 -22   5  219.07   70.74
   0 -22   5  309.45   67.49
   0  22  -6  240.33   67.82
   0 -22  -6  175.68   59.93
   0 -22   6  122.70   37.63
   0 -22   6  372.61   52.31
   0  22  -7   45.59   25.44
   0 -22  -7  109.19   52.84
   0 -22   7   80.17   26.21
   0  22  -8  684.80  118.55
   0 -22  -8  487.93  287.93
   0 -22   8  967.54   94.71
   0 -22   9   47.35   29.77
   0 -22  10   95.14   43.82
   0  24   0   18.02   25.60
   0  24   0    9.75   10.33
   0 -24   0   18.37   14.97
   0  24  -1   16.25    7.28
   0  24   1   16.19   12.76
   0 -24  -1   54.97   30.27
   0 -24   1  -20.06   38.77
   0 -24   1   44.36   25.19
   0 -24  -1  -11.60   11.80
   0  24  -2  322.50   48.21
   0  24  -2  373.48   74.92
   0  24   2  454.93   53.08
   0 -24  -2  349.58   47.32
   0 -24   2  332.63   44.20
   0 -24  -2  394.74   42.46
   0  24  -3 1332.04  121.98
   0  24   3 1292.51  120.07
   0 -24   3 1075.57   97.80
   0 -24  -3  945.16   85.29
   0 -24  -3 1108.31   98.41
   0 -24   3 1169.08  214.52
   0  24  -4  152.44   44.22
   0  24   4  210.95   44.17
   0 -24   4  203.94   39.85
   0 -24   4  140.13   44.34
   0  24  -5   53.04   17.28
   0 -24   5   59.09   38.05
   0  24  -6   13.46   18.82
   0 -24  -6   95.07   39.55
   0 -24   6   58.54   16.91
   0  24  -7   73.45   32.43
   0 -24  -7   11.55   41.50
   0 -24   7  112.23   42.38
   0 -24  -8   57.49   45.96
   0 -24   8   40.73   29.33
   0 -24  -9   51.75   77.55
   0 -24   9  144.99   35.43
   0  26   0  258.28   55.09
   0 -26   0  313.01   67.69
   0 -26   0  231.56   41.99
   0  26  -1   18.22   14.30
   0  26  -1   19.46   12.26
   0  26   1   21.45   14.21
   0 -26  -1   15.96   11.75
   0 -26   1   15.31   12.50
   0  26  -2   87.24   34.77
   0  26  -2  114.35   27.99
   0  26   2  196.98   59.39
   0 -26  -2  179.75   42.47
   0 -26  -2  171.14   27.87
   0 -26   2  173.84   53.64
   0  26  -3  634.62   77.75
   0  26   3  670.76   83.92
   0 -26   3  540.45   64.67
   0 -26  -3  541.25   81.07
   0 -26  -3  764.59   58.72
   0  26  -4  831.12   81.66
   0  26   4 1135.38  112.01
   0 -26   4 1251.34  127.25
   0  26   5    7.39   20.24
   0 -26   5    3.43    5.53
   0 -26   5  -15.68   24.86
   0  26  -6   49.10   19.05
   0  26   6  105.26   22.28
   0 -26   6   79.69   27.80
   0  26  -7   46.86   25.81
   0 -26  -7   34.41   44.37
   0 -26   7   39.56   39.21
   0 -26  -8  129.20   55.64
   0 -26   8  -15.14   28.46
   0 -26  -9   -3.28   48.38
   0 -26   9   71.11   34.66
   0  28   0 2017.00  153.96
   0 -28   0 2010.29  153.39
   0  28  -1  421.35   63.32
   0  28   1  528.90  108.25
   0 -28  -1  302.73   54.07
   0 -28   1  382.35   85.54
   0 -28  -1  465.62  105.77
   0  28  -2  612.56  172.74
   0  28  -2 1206.00  113.31
   0  28   2 1181.25  114.18
   0 -28   2 1242.41  139.08
   0 -28  -2 1217.32  114.46
   0  28  -3  435.13   88.44
   0  28   3  478.82   59.60
   0 -28  -3  190.29   55.39
   0 -28  -3  362.32   51.42
   0 -28   3  446.31   89.83
   0  28  -4  199.46   43.67
   0  28   4  255.09   75.12
   0 -28   4  287.75   49.78
   0  28  -5   64.92   24.65
   0  28   5   20.80   15.04
   0 -28   5    7.16   22.71
   0  28  -6  541.53   83.88
   0  28   6  471.87  182.95
   0  28   7   30.03   15.93
   0 -28   7   99.30   38.09
   0  28   8  318.65   79.27
   0 -28   8  154.52   49.16
   0  30   0  359.72  108.38
   0 -30   0  375.62   30.29
   0  30  -1  846.99   95.34
   0  30   1  926.15  112.01
   0 -30  -1  791.21  104.10
   0 -30  -1  951.93  108.16
   0 -30   1  913.01  132.62
   0  30  -2   28.06   11.40
   0  30   2   49.35   21.98
   0 -30  -2   15.33   10.19
   0 -30   2   46.47   27.47
   0  30  -3   41.20   21.48
   0  30   3   67.14   17.80
   0 -30  -3   55.63   10.08
   0 -30   3   92.55   27.34
   0  30   4   89.02   27.72
   0 -30   4  135.98   37.99
   0  30  -5  293.29  105.62
   0 -30   5  479.07   58.76
   0  30   6   25.74   13.45
   0 -30   6   39.62   24.50
   0  30   7  103.94   29.91
   0 -30   7  154.04   38.66
   0  30   8   21.53    9.75
   0 -30   8   10.99   26.70
   0  32   0  333.49   46.02
   0 -32   0  195.92   77.57
   0  32  -1   51.25   13.81
   0  32   1   40.53   20.98
   0 -32   1   90.38   22.35
   0 -32  -1   44.94   19.21
   0  32  -2  119.19   14.11
   0  32   2  130.05   37.93
   0 -32   2  125.77   28.55
   0 -32  -2  160.04   38.97
   0  32   3   22.72   10.23
   0 -32   3   56.34   30.99
   0  32   4   71.86   24.60
   0 -32   4  129.31   32.86
   0  32   5   84.52   22.37
   0 -32   5   98.68   30.47
   0 -32   6   53.23   33.03
   0  32   7  -12.57   21.86
   0 -32   7   -0.32   24.53
   0  34   0  310.07   35.88
   0 -34   0  390.53   42.28
   0  34  -1   51.64   17.87
   0  34   1   43.66   17.59
   0 -34  -1   40.25   14.64
   0 -34   1   28.61   19.72
   0  34  -2  194.87   20.07
   0  34   2  144.08   63.43
   0 -34   2  174.91   36.88
   0  34   3  149.60   27.69
   0 -34   3  152.75   69.47
   0  34   4  139.40   47.22
   0 -34   4  243.54   42.13
   0  34   5   53.63   23.03
   0 -34   5    6.89   23.91
   0  34   6    9.57   16.21
   0 -34   6  112.58   44.83
   0  36   0   30.91   17.15
   0 -36   0   78.00   26.48
   0  36  -1  132.15   27.02
   0  36   1  155.58   38.97
   0 -36  -1   73.15   24.16
   0 -36   1  130.89   26.11
   0  36   2   88.68   54.75
   0 -36   2  113.32   36.95
   0  36  -3  549.91   38.74
   0  36   3  455.93   35.64
   0 -36   3  614.61   46.35
   0  36   4   18.64   14.98
   0 -36   4   59.17   27.54
   0  36   5  136.69   96.73
   0 -36   5  260.64   69.64
   0  38   0  299.42   60.74
   0  38  -1   27.72   19.95
   0  38  -2   72.78   19.74
   0  38   2   88.56   19.58
   0 -38   2  143.78   43.36
   0  38   3   33.75   11.43
   0  38   4   50.50   23.58
   0 -38   4   89.87   34.77
   0  40   0   44.54   17.09
   0  40  -1   -3.67   15.17
   0  40   1   -2.12   15.56
   0 -40   2   14.26   19.58
  -1   1  12   21.39   16.02
   1   1 -12  105.06   52.22
   1  -1 -12   41.72   47.63
  -1  -1  12   29.57   14.96
   1   1 -11   45.45   39.71
  -1   1  11    3.88   12.83
  -1  -1  11   36.68   17.88
   1  -1 -11   -6.36   45.61
  -1   1  10  108.74   21.30
   1  -1 -10   47.26   39.74
  -1  -1  10  137.77   35.31
  -1   1   9  408.99   92.15
   1   1  -9  401.36   65.69
   1  -1  -9  376.59  107.24
  -1  -1   9  489.26   57.48
   1   1  -8  834.71   92.01
  -1   1   8  967.75   91.48
   1  -1  -8  772.47   87.82
  -1  -1   8  999.07  101.61
  -1   1   7   26.04   20.63
   1   1  -7   64.97   34.50
  -1  -1   7  -21.81   23.98
  -1  -1   7    1.52   10.45
   1  -1  -7   57.46   30.67
   1   1  -6   64.38   27.03
  -1   1   6   10.28   23.83
  -1   1   6   19.14   13.72
   1  -1  -6  -18.06   31.45
  -1  -1   6   79.29   27.55
  -1  -1   6   36.45   14.68
   1   1  -5 1407.06  153.53
  -1   1   5 1498.83   82.88
  -1   1   5 1318.83   76.41
   1  -1  -5 1267.32  135.84
  -1  -1   5 1624.34   86.55
  -1  -1   5 1557.73   73.21
  -1   1   4   10.97   11.90
   1   1  -4   30.10   13.22
  -1   1   4   20.77   23.39
  -1  -1   4   38.34   21.04
   1  -1  -4  -22.47   25.40
  -1  -1   4   23.83   16.39
   1   1  -3 2128.88   71.34
  -1   1   3 2181.36   71.56
  -1   1   3 2053.62   56.27
   1  -1  -3 2111.07   70.56
  -1  -1   3 2040.81   83.79
  -1  -1   3 2099.44   64.24
  -1   1   2 3388.08   92.72
   1   1  -2 3214.81   86.98
  -1   1   2 3305.63   94.62
   1  -1  -2 3558.98  101.40
  -1  -1   2 3640.91   95.74
  -1  -1   2 3488.24  107.60
  -1   1  -2  863.87   63.81
   1   1   2  852.43   54.64
   1   1   2  887.85   62.39
  -1   1  -2  810.18   53.25
   1  -1   2  803.46   52.15
  -1  -1  -2  879.37   64.98
  -1  -1  -2  939.64   58.53
   1  -1   2  617.67   43.98
   1   1   3 2011.77   93.48
  -1   1  -3 1963.86   80.47
  -1   1  -3 1972.97   91.62
   1   1   3 1875.06  113.92
   1  -1   3 1731.95  110.45
  -1  -1  -3 2035.17   99.60
  -1  -1  -3 1944.87   80.67
   1  -1   3 2100.91   60.86
  -1   1  -4  430.48   45.84
   1   1   4  495.88   44.40
   1   1   4  492.82   34.48
  -1   1  -4  463.40   32.86
  -1  -1  -4  364.87   34.35
   1  -1   4  537.91   74.66
  -1  -1  -4  490.52   29.94
   1  -1   4  337.62   37.05
  -1   1  -5  314.51   30.45
  -1   1  -5  369.28   59.41
   1   1   5  436.12   49.94
  -1  -1  -5  467.97   57.07
   1  -1   5  422.78   44.74
  -1  -1  -5  419.36   54.52
   1  -1   5  285.75   34.07
  -1   1  -6 1063.59  199.53
  -1   1  -6 1018.89   82.86
   1   1   6  922.11  162.37
   1   1   6 1079.30   67.63
  -1  -1  -6 1068.35   83.58
   1  -1   6 1044.43  111.39
  -1  -1  -6  828.72   29.97
   1  -1   6  690.81   98.58
  -1   1  -7  765.30   90.72
   1   1   7  791.65   98.61
  -1   1  -7  612.80  138.56
  -1  -1  -7  649.44   85.76
   1  -1   7  698.38   72.19
  -1  -1  -7  686.34   68.65
  -1   1  -8  518.98   93.93
   1   1   8  529.09   91.83
   1  -1   8  399.40   58.39
  -1  -1  -8  492.60  106.00
  -1   1  -9  679.39  243.74
   1   1   9  976.55  111.43
  -1  -1  -9 1205.19  193.87
   1  -1   9  943.82  107.95
  -1   1 -10   46.25   36.77
   1   1  10   13.03    7.34
  -1  -1 -10   69.27   48.83
   1  -1  10   10.80   13.25
  -1   1 -11   25.39   50.44
   1   1  11   18.45   14.55
  -1  -1 -11   -6.25   43.51
   1  -1  11   25.60   11.33
   1   1  12   49.69   17.26
  -1   1 -12   31.66   49.85
  -1  -1 -12   41.18   58.02
   1  -1  12   48.22   21.19
   1   3 -12    4.94   39.43
   1  -3 -12   25.89   41.96
  -1  -3  12   38.53   20.99
  -1   3  11   77.50   44.82
   1  -3 -11   49.48   52.76
  -1  -3  11  -13.81   16.93
  -1   3  10   54.89   25.95
   1   3 -10  148.60   34.21
   1  -3 -10  108.78   63.90
  -1   3   9   25.37   16.49
   1   3  -9   12.24   35.22
   1  -3  -9  100.09   50.31
  -1  -3   9   52.14   17.91
  -1   3   8  981.59   98.77
   1   3  -8 1249.31  126.43
  -1   3   8  996.26  114.26
  -1  -3   8 1365.62  127.24
   1  -3  -8  727.64  154.56
  -1   3   7  915.49   64.43
   1   3  -7 1136.13   91.73
  -1  -3   7  719.45   76.82
  -1  -3   7 1000.62   96.68
   1  -3  -7  815.67  100.46
  -1   3   6 3204.38  181.30
   1   3  -6 3565.34  213.82
  -1   3   6 3265.19  195.70
  -1  -3   6 3308.08  195.35
   1  -3  -6 3257.14  201.28
  -1  -3   6 3301.02  190.10
   1   3  -5  369.09   43.45
  -1   3   5  401.16   34.31
  -1   3   5  400.25   41.68
  -1  -3   5  525.05  100.16
  -1  -3   5  386.08   33.20
   1  -3  -5  334.31   61.73
  -1   3   4  652.65   31.15
   1   3  -4  690.52   46.15
  -1   3   4  660.75   44.36
  -1  -3   4  628.95   72.69
   1  -3  -4  720.41   57.07
  -1  -3   4  611.88   35.30
  -1   3   3  716.33   45.00
   1   3  -3  735.13   53.96
  -1   3   3  773.46   56.52
  -1  -3   3  745.70   50.97
   1  -3  -3  989.74   72.79
  -1  -3   3  811.13   67.56
  -1   3   2 5179.16  133.19
  -1   3   2 5163.86  137.91
   1   3  -2 5682.39  140.67
  -1  -3   2 5817.09  142.31
   1  -3  -2 4799.36  129.71
  -1  -3   2 4982.57  150.57
  -1   3   1 2129.80   65.42
  -1   3   1 2125.89   53.67
   1   3  -1 2076.12   70.74
  -1  -3   1 1843.70  119.26
   1  -3  -1 1709.47  101.86
   1   3   1 1376.30   83.37
   1   3   1  939.00   61.88
  -1   3  -1  730.45   47.04
  -1   3  -1  899.93   56.34
  -1  -3  -1 1065.34   73.10
  -1  -3  -1 1018.91   61.61
   1  -3   1 1110.26   68.57
   1  -3   1 1041.98   64.88
   1   3   247028.92 1761.16
   1   3   241241.73  969.78
  -1   3  -242214.88  986.27
  -1   3  -244662.48 1038.14
  -1  -3  -246387.21 1747.05
  -1  -3  -245628.29 1056.76
   1  -3   246507.93 1743.94
   1  -3   249539.88 1859.56
   1   3   3 8402.07  200.72
  -1   3  -3 9238.95  237.23
   1   3   3 8642.78  227.20
  -1   3  -3 8109.27  198.32
  -1  -3  -3 8381.14  224.01
   1  -3   3 8038.40  202.68
  -1  -3  -3 8200.22  196.79
   1  -3   3 8236.94  203.31
   1   3   4 2754.20   84.89
  -1   3  -4 2701.85  105.79
   1   3   4 2745.80  105.44
  -1   3  -4 2864.69   93.69
  -1  -3  -4 3063.29  120.25
  -1  -3  -4 2733.62   85.21
   1  -3   4 2958.22   97.31
   1  -3   4 2726.18   96.28
   1   3   5  806.45   59.54
   1   3   5  990.31  151.19
  -1   3  -5  910.74   66.19
  -1   3  -5  986.39  123.80
  -1  -3  -5  756.30   73.94
  -1  -3  -5 1057.43   78.07
   1  -3   5  846.99   64.24
   1  -3   5  838.32   73.05
   1   3   6  345.49   31.01
  -1   3  -6  291.46   48.78
   1   3   6  310.73   46.37
  -1   3  -6  409.20   37.24
  -1  -3  -6  339.98   42.36
   1  -3   6  482.91   45.21
  -1  -3  -6  380.60   57.75
   1  -3   6  344.05   65.51
  -1   3  -7   35.40   34.75
   1   3   7   84.84   31.76
  -1   3  -7  105.46   25.61
  -1  -3  -7  161.61   76.86
   1  -3   7  128.27   43.10
  -1  -3  -7   84.39   20.94
   1  -3   7  103.57   25.37
  -1   3  -8  825.07   89.30
   1   3   8  594.24   72.20
  -1  -3  -8  468.06   85.74
   1  -3   8  586.10   92.76
  -1  -3  -8  372.15  103.26
   1   3   9   11.15    8.94
  -1   3  -9   60.10   55.01
  -1  -3  -9   28.54   46.29
   1  -3   9    3.27    9.61
  -1   3 -10  231.46   50.44
   1   3  10  263.39   27.57
   1  -3  10  294.18   36.28
  -1   3 -11   25.79   47.68
  -1  -3 -11   45.29   53.26
   1  -3  11   25.78   17.40
  -1   3 -12   56.03   56.74
  -1  -3 -12   18.37   47.95
   1  -3  12   24.06   19.39
   1   5 -12   63.82   43.03
   1  -5 -12   71.75   53.85
  -1  -5  12   19.30   18.30
   1   5 -11  215.04   63.22
   1  -5 -11  166.22   70.34
  -1  -5  11   55.37   17.66
  -1   5  10   28.65   14.05
   1   5 -10   69.04   56.59
   1  -5 -10  104.70   48.97
  -1  -5  10   91.17   29.83
  -1   5   9   86.81   25.99
   1   5  -9  145.55   37.65
   1  -5  -9  202.43   54.79
  -1  -5   9  154.33   35.91
  -1   5   8  130.95   16.01
   1   5  -8  113.34   31.14
  -1   5   8  133.24   42.78
  -1  -5   8  102.27   23.23
   1  -5  -8  127.15   57.94
  -1  -5   8  187.34   38.66
   1   5  -7  509.71   68.91
  -1   5   7  539.65   59.49
   1  -5  -7  481.13  116.98
  -1  -5   7  410.11   81.94
  -1  -5   7  551.02   76.27
  -1   5   6  383.42   20.89
   1   5  -6  413.82   36.21
  -1   5   6  375.29   41.87
  -1  -5   6  226.80   53.22
   1  -5  -6  411.66   88.83
  -1  -5   6  539.13   90.22
   1   5  -5  316.04   35.98
  -1   5   5  301.70   30.85
   1  -5  -5  270.00   44.19
  -1  -5   5  307.84   30.67
  -1  -5   5  424.41   56.37
  -1   5   4   21.97    9.76
   1   5  -4   21.45   21.34
  -1   5   4   33.52   26.35
  -1  -5   4    7.24   17.71
   1  -5  -4  -17.34   26.99
  -1  -5   4   20.10   20.24
  -1   5   3  869.31   82.71
  -1   5   3  751.09   58.65
   1   5  -3  893.05   60.60
  -1   5   3  813.89   52.19
   1  -5  -3  901.33   69.89
  -1  -5   3  934.54   76.63
  -1  -5   3  932.94   64.83
  -1   5   2 7250.88  188.87
  -1   5   2 7192.81  167.52
   1   5  -2 7458.37  179.67
  -1   5   2 7156.47  170.12
  -1  -5   2 7014.80  204.44
   1  -5  -2 6748.11  207.51
  -1   5   1  312.52   75.17
   1   5  -1  312.17   19.40
   1   5  -1  357.38   52.85
  -1   5   1  297.44   21.59
  -1   5   1  305.09   19.21
  -1  -5   1  290.12   18.04
   1  -5  -1  347.35   21.80
  -1  -5   1  303.37   99.31
   1   5   0  974.02   69.15
   1   5   0  848.74   55.52
  -1   5   0  922.34   56.85
  -1   5   0  912.95   59.46
   1  -5   0  943.70   57.89
  -1  -5   0  829.50   57.35
  -1  -5   0  890.81   58.11
   1  -5   0  975.25   60.13
   1   5   1 7457.18  187.45
  -1   5  -1 7452.76  179.68
   1  -5   1 6780.02  161.15
  -1  -5  -1 7149.10  184.63
   1  -5   1 7228.59  174.53
   1   5   226485.33  631.63
   1   5   226775.59  621.69
  -1   5  -227833.93  651.71
  -1  -5  -228366.37  677.11
   1  -5   226604.81  623.20
  -1  -5  -229319.12  680.22
   1  -5   228656.75  670.77
   1   5   3 1809.93  109.86
   1   5   3 1344.82   92.99
  -1   5  -3 1521.03   98.14
  -1   5  -3 1882.00  116.94
  -1  -5  -3 1421.15  102.06
   1  -5   3 1828.97  115.54
  -1  -5  -3 1798.65  109.81
   1  -5   3 1923.94   84.71
   1   5   4   55.15   10.78
   1   5   4  121.23   32.89
  -1   5  -4   86.73   30.04
  -1   5  -4   68.91   14.44
  -1  -5  -4  117.66   38.99
  -1  -5  -4   47.25   10.31
   1  -5   4   83.66   20.08
   1  -5   4   65.02   26.34
   1   5   5 2529.03  103.85
   1   5   5 2779.98  135.30
  -1   5  -5 2617.68  124.33
  -1   5  -5 2585.46  112.05
  -1  -5  -5 2704.17  143.17
  -1  -5  -5 2347.00   97.89
   1  -5   5 2527.52  110.92
   1  -5   5 2568.17  116.31
   1   5   6  181.61   18.45
   1   5   6   44.52   30.73
  -1   5  -6  153.21   37.38
   1  -5   6  107.56   23.26
  -1  -5  -6  133.22   43.42
   1  -5   6  132.11   20.39
  -1  -5  -6  168.27   26.73
  -1   5  -7  315.88   78.93
   1   5   7  275.05   37.67
  -1  -5  -7  315.73   65.95
   1  -5   7  139.42   46.83
   1  -5   7  261.37   44.21
  -1  -5  -7  282.52   32.06
   1   5   8   13.64   10.73
  -1   5  -8   43.76   30.57
  -1  -5  -8   40.51   50.66
   1  -5   8   28.21   20.63
  -1   5  -9  151.35   43.16
   1   5   9  155.73   48.91
  -1  -5  -9  219.68   59.91
   1  -5   9  196.07   37.17
   1   5  10   33.35   13.54
  -1   5 -10   -0.41   46.21
  -1  -5 -10  108.56   58.26
   1  -5  10   26.20   15.95
  -1   5 -11   50.88   41.11
  -1  -5 -11   88.10   49.76
   1  -5  11   87.73   18.35
  -1   5 -12  -45.11   53.06
  -1  -5 -12   29.71   17.62
   1  -7 -12  136.18   73.54
   1   7 -11  244.79   90.21
   1  -7 -11  425.36   72.15
  -1  -7  11  222.59   87.40
   1   7 -10  439.32   72.92
  -1   7  10  245.39   46.75
  -1  -7  10  300.45   38.04
  -1   7   9   47.27   17.36
   1   7  -9  119.08   41.85
   1  -7  -9   43.59   44.02
  -1  -7   9   51.86   18.96
  -1   7   8  302.35   54.05
   1   7  -8  316.13   89.74
  -1   7   8  305.29   57.70
  -1  -7   8  246.64   70.57
   1  -7  -8  347.76   71.68
  -1  -7   8  261.74   44.97
  -1   7   7  426.81   56.62
   1   7  -7  514.92   72.61
  -1   7   7  345.19   50.09
  -1  -7   7  483.63   55.11
   1  -7  -7  401.18   70.00
  -1  -7   7  551.50   81.89
  -1   7   6 2025.62  130.65
  -1   7   6 2081.12  136.93
   1   7  -6 2053.33  129.95
  -1   7   6 2146.92  124.25
   1  -7  -6 2277.16  155.20
  -1  -7   6 2222.69  133.47
  -1  -7   6 2007.34  120.72
  -1   7   5  764.01   49.63
  -1   7   5  701.34   52.45
   1   7  -5  695.74   45.25
  -1   7   5  744.19   39.17
   1  -7  -5  661.70   55.07
  -1  -7   5  839.41  103.62
  -1  -7   5  819.70   48.29
  -1   7   4 2513.83   87.82
  -1   7   4 2756.26  117.96
   1   7  -4 2507.65   88.79
  -1   7   4 2574.71   75.47
   1  -7  -4 2577.80  128.09
  -1  -7   4 2943.33   95.05
  -1  -7   4 2670.67   92.88
  -1   7   3   69.39   13.14
  -1   7   3   18.28   33.56
   1   7  -3   33.44   19.25
  -1   7   3   42.93    6.00
   1  -7  -3   64.86   29.24
  -1  -7   3   35.41    8.89
  -1  -7   3   70.19   22.47
  -1   7   2  801.80   59.58
   1   7  -2  954.48   59.60
   1  -7  -2  901.17   88.81
  -1  -7   2  763.44   46.59
  -1  -7   2  851.87   76.72
  -1   7   1 4088.90  114.10
   1   7  -1 4478.28  105.84
  -1   7   1 4293.83  107.24
  -1   7   1 4443.12  105.73
  -1  -7   1 4177.25   99.19
   1  -7  -1 4348.41  104.08
  -1  -7   1 4179.60  131.10
   1   7   0 6724.99  181.35
   1   7   0 6935.15  174.55
  -1   7   0 6698.79  160.55
  -1   7   0 6648.00  158.97
  -1  -7   0 6833.51  180.23
  -1  -7   0 7752.99  206.41
   1  -7   0 6824.96  163.11
   1  -7   0 6250.12  150.52
   1   7   1 3825.42  108.22
  -1   7  -1 3553.46   88.19
   1   7   1 3501.57   98.37
  -1   7  -1 4193.65  107.23
  -1  -7  -1 4003.64  116.07
   1  -7   1 3961.80   96.69
   1  -7   1 3896.60   99.94
   1   7   2 4630.51  115.84
   1   7   2 4958.58  141.13
  -1   7  -2 5059.84  129.50
  -1  -7  -2 5267.61  150.95
   1  -7   2 4797.54  122.69
  -1  -7  -2 5142.96  123.39
   1   7   3 1552.15  106.64
  -1   7  -3 1458.92   92.49
  -1   7  -3 1476.88  100.45
   1   7   3 1452.09   88.60
  -1  -7  -3 1692.88  118.58
  -1  -7  -3 1495.28   90.11
   1  -7   3 1540.89  100.20
   1  -7   3 1471.06   92.10
   1   7   4   33.84    7.61
   1   7   4   86.28   44.63
  -1   7  -4   85.38   34.11
  -1   7  -4   15.55   18.85
  -1  -7  -4   63.47   36.42
  -1  -7  -4    9.39    9.98
   1  -7   4   47.32   19.03
   1  -7   4   48.79    9.96
   1   7   5 1569.91   66.54
  -1   7  -5 1444.26   81.48
   1   7   5 1360.27   78.38
  -1   7  -5 1412.78   69.22
  -1  -7  -5 1201.22   76.48
  -1  -7  -5 1328.62   57.46
   1  -7   5 1392.00   69.79
   1  -7   5 1591.68   79.13
  -1   7  -6   33.16   18.42
   1   7   6   40.22   13.59
  -1   7  -6   59.72   19.34
  -1  -7  -6   67.38   41.77
   1  -7   6    5.18   13.67
   1  -7   6   48.98   20.95
  -1  -7  -6    9.73   13.27
  -1   7  -7   28.06   28.94
   1   7   7   30.26   15.20
  -1  -7  -7   56.28   41.09
   1  -7   7   47.27   22.08
   1  -7   7   12.57   18.56
  -1  -7  -7   29.67   10.77
   1   7   8   11.98    6.10
  -1   7  -8  -10.97   32.18
  -1  -7  -8   48.45   38.10
   1  -7   8   30.90   15.36
  -1   7  -9   93.54   56.46
   1   7   9  193.71   58.22
  -1  -7  -9  123.55   53.77
   1  -7   9  120.53   24.16
  -1   7 -10   74.57   39.52
  -1  -7 -10  149.45   54.77
   1  -7  10  154.66   39.82
  -1   7 -11    5.06   45.12
  -1  -7 -11   15.03   57.89
   1  -7  11   44.60   18.05
  -1   7 -12   34.29   40.93
  -1  -7 -12   47.89   64.23
   1  -7  12    2.58    9.60
   1  -9 -12  238.11   97.84
   1   9 -11  102.78   44.11
   1  -9 -11  158.33   54.71
  -1  -9  11  139.25   30.10
  -1   9  10  210.29   43.87
   1   9 -10  157.54   37.38
   1  -9 -10  268.37   64.07
  -1  -9  10  160.80   44.43
  -1   9   9   23.24   16.44
   1   9  -9   41.07   33.47
  -1   9   9   47.31   14.30
   1  -9  -9   74.53   53.64
  -1  -9   9  126.67   30.97
   1   9  -8  792.52   80.71
  -1   9   8  769.22   60.08
   1  -9  -8  628.40  214.83
  -1  -9   8  667.30  134.74
  -1  -9   8  759.29   79.29
  -1   9   7   12.95   19.77
   1   9  -7   31.64   22.53
  -1   9   7   10.10    5.24
   1  -9  -7   48.51   27.82
  -1  -9   7   17.91   16.21
  -1   9   6 2491.14   85.88
   1   9  -6 2316.25  101.03
  -1   9   6 2114.49   93.55
  -1  -9   6 2533.61   99.22
   1  -9  -6 2400.91  122.95
  -1  -9   6 2367.71   96.11
  -1   9   5  479.05   35.82
  -1   9   5  442.07   47.74
   1   9  -5  583.63   36.03
  -1   9   5  514.18   11.80
   1  -9  -5  502.60   50.52
  -1  -9   5  416.22   53.92
  -1  -9   5  465.63   39.00
  -1   9   4 4067.97  174.68
  -1   9   4 4004.26  188.93
   1   9  -4 4194.89  183.54
  -1   9   4 4053.02  166.97
   1  -9  -4 4336.22  207.06
  -1  -9   4 3587.30  155.46
  -1  -9   4 4112.01  180.59
   1   9  -3  887.38   41.13
  -1   9   3  766.93   49.42
   1  -9  -3  987.64   64.36
  -1  -9   3 1099.53   74.98
  -1  -9   3  987.55   64.34
  -1   9   2 1187.17   84.83
   1   9  -2 1141.32   70.07
   1  -9  -2 1162.13   85.81
  -1  -9   2 1186.86   71.20
  -1  -9   2 1140.50   95.64
  -1   9   1 2641.57   85.18
   1   9  -1 2627.09   73.08
  -1   9   1 2594.15   70.28
   1   9  -1 2484.27   64.04
  -1  -9   1 2677.75  121.81
   1  -9  -1 2727.92   67.39
   1   9   015052.84  379.22
   1   9   014862.48  358.82
  -1   9   014869.07  349.86
  -1   9   015241.18  358.68
   1  -9   015446.91  363.30
  -1  -9   014952.26  360.89
   1  -9   015109.87  356.67
  -1  -9   015847.34  395.30
   1   9   1   94.49   28.00
   1   9   1   54.78   15.59
  -1   9  -1   61.80   13.44
  -1   9  -1   97.02   16.64
   1  -9   1   60.74   13.27
  -1  -9  -1   63.64   21.68
   1  -9   1   68.89   14.53
  -1  -9  -1   65.56   27.52
   1   9   2 5797.61  152.05
   1   9   2 5404.53  155.97
  -1   9  -2 5289.94  133.31
  -1   9  -2 5486.50  139.86
  -1  -9  -2 5309.36  157.68
  -1  -9  -2 5046.62  121.34
   1  -9   2 5073.84  130.59
   1  -9   2 5516.05  134.51
   1   9   3 1315.41   48.43
   1   9   3 1266.33   65.57
  -1   9  -3 1365.36   57.49
  -1   9  -3 1258.40   51.06
  -1  -9  -3 1342.65   76.65
  -1  -9  -3 1220.10   38.61
   1  -9   3 1287.15   55.22
   1  -9   3 1349.52   50.90
   1   9   4 4146.38  175.27
   1   9   4 4425.04  204.61
  -1   9  -4 4364.51  193.41
  -1   9  -4 4574.46  199.53
  -1  -9  -4 3807.56  183.93
   1  -9   4 4421.23  192.31
  -1  -9  -4 4710.04  196.50
   1  -9   4 4280.87  185.56
   1   9   5  116.16   18.75
  -1   9  -5  114.82   26.41
   1   9   5   79.33   29.36
  -1   9  -5   97.13   16.20
  -1  -9  -5   28.76   37.93
  -1  -9  -5  110.42   14.00
   1  -9   5  204.32   29.16
   1  -9   5   48.32   11.42
   1   9   6  608.85   58.43
  -1   9  -6  642.46   74.42
  -1  -9  -6  504.73   68.97
   1  -9   6  621.61  142.34
  -1  -9  -6  560.98   53.85
  -1   9  -7   58.97   30.20
   1   9   7   16.20    8.74
  -1  -9  -7   39.03   45.83
   1  -9   7   -5.46   12.43
   1  -9   7   55.56   22.03
  -1  -9  -7   43.80   14.02
   1   9   8   33.85   16.48
  -1   9  -8   20.29   31.52
  -1  -9  -8  -31.16   40.41
   1  -9   8   22.74   21.72
   1   9   9  870.31   33.11
  -1   9  -9  501.06  161.49
  -1  -9  -9  885.54   86.24
   1  -9   9  816.46  108.59
   1   9  10   11.98   12.01
  -1   9 -10   28.12   42.65
  -1  -9 -10  -33.82   51.70
   1  -9  10   17.83   17.77
  -1   9 -11  106.88   49.90
  -1  -9 -11  102.09   60.60
   1  -9  11   43.68   20.83
   1  11 -11   39.99   38.29
   1 -11 -11   20.51   53.18
  -1 -11  11   28.85   20.81
   1  11 -10   98.08   35.72
   1 -11 -10   81.32   50.12
  -1 -11  10  120.65   65.10
  -1  11   9   19.30    9.03
   1  11  -9   50.98   32.04
   1 -11  -9   35.35   47.10
  -1 -11   9   52.91   14.16
  -1  11   8  525.37  136.29
   1  11  -8  604.75   77.74
  -1  11   8  687.57   70.92
   1 -11  -8  906.55  107.98
  -1 -11   8  855.65   91.14
  -1  11   7  300.85   31.79
   1  11  -7  263.39   70.34
  -1  11   7  207.54   82.94
  -1 -11   7  285.76   77.16
   1 -11  -7  509.77   78.49
  -1 -11   7  283.22   61.72
  -1  11   6  401.95   38.27
   1  11  -6  493.97   57.31
  -1  11   6  270.39   64.01
  -1 -11   6  356.99   65.51
   1 -11  -6  452.34   62.03
  -1 -11   6  398.26   45.71
  -1  11   5   27.61    7.16
  -1  11   5   82.04   31.01
   1  11  -5   98.57   21.03
  -1  11   5   47.85    7.07
   1 -11  -5  156.36   38.83
  -1 -11   5   50.71   11.52
  -1 -11   5   89.28   21.31
   1  11  -4    8.85   10.87
  -1  11   4  -12.45   25.61
   1 -11  -4   13.85   19.40
  -1 -11   4   -0.12    7.16
  -1 -11   4   23.33   15.66
   1  11  -3   57.19   19.60
  -1  11   3   22.82   25.29
   1 -11  -3   67.92   35.67
  -1 -11   3   46.95    6.83
  -1 -11   3   54.80   34.43
  -1  11   2  493.83   45.54
   1  11  -2  497.45   23.92
  -1  11   2  382.41   25.42
  -1 -11   2  427.96   19.67
  -1 -11   2  376.99   54.99
   1 -11  -2  436.66   44.75
   1 -11  -2  405.40   17.51
  -1  11   1 2741.83   90.23
   1  11  -1 2762.44   78.94
   1  11  -1 2634.06   66.28
  -1  11   1 2694.29   72.92
  -1 -11   1 2646.91  146.16
   1 -11  -1 2737.93   69.94
   1  11   0 1105.21   76.76
  -1  11   0  988.83   62.33
  -1  11   0  985.09   63.40
   1  11   0 1024.25   63.86
  -1 -11   0 1068.58   86.82
   1 -11   0  999.11   63.38
   1 -11   0 1023.41   64.35
   1  11   1 6869.40  189.34
   1  11   1 6339.18  171.08
  -1  11  -1 6840.69  167.20
  -1  11  -1 6914.21  171.38
  -1 -11  -1 6960.31  190.46
  -1 -11  -1 6639.15  174.58
   1 -11   1 6674.93  166.46
   1 -11   1 6781.13  163.71
   1  11   2 4072.83  136.02
   1  11   2 3648.55  150.41
  -1  11  -2 3996.42  129.11
  -1  11  -2 3696.82  116.51
  -1 -11  -2 3601.30  134.33
  -1 -11  -2 4054.66  123.13
   1 -11   2 3477.00  109.31
   1 -11   2 3887.53  114.95
  -1  11  -319519.42  559.71
   1  11   318816.04  555.54
   1  11   321034.34  599.18
  -1 -11  -319087.88  565.97
  -1 -11  -320618.04  578.85
   1 -11   318718.04  536.75
   1 -11   317755.41  501.83
   1  11   4 3160.35  139.59
   1  11   4 3112.16  153.30
  -1  11  -4 3245.86  148.69
  -1  11  -4 3234.81  144.87
  -1 -11  -4 3519.45  175.90
  -1 -11  -4 3228.75  136.35
   1 -11   4 3012.55  136.79
   1 -11   4 3696.65  159.98
   1  11   5 1057.23   66.50
   1  11   5  765.00   55.62
  -1  11  -5  773.63   46.44
  -1  11  -5  849.90  108.93
  -1 -11  -5  969.11  179.10
  -1 -11  -5  889.94   52.60
   1 -11   5 1033.07   93.60
   1 -11   5  880.90   56.70
  -1  11  -6 1183.75   90.31
   1  11   6 1195.86   74.03
  -1 -11  -6 1375.86  118.29
   1 -11   6 1122.48   80.89
   1 -11   6 1240.49   87.40
  -1 -11  -6 1246.46   77.67
  -1  11  -7  726.40  161.75
   1  11   7  658.65   92.06
  -1 -11  -7  824.12  106.60
   1 -11   7  438.78  107.89
   1 -11   7  768.72   79.32
  -1 -11  -7  695.34   23.00
   1  11   8  248.92   39.21
  -1  11  -8  278.80   46.54
  -1 -11  -8  380.28   78.72
   1 -11   8  252.99   33.87
   1  11   9  530.74   88.47
  -1  11  -9  692.48   95.69
  -1 -11  -9  534.20  148.27
   1 -11   9  575.03  157.86
  -1  11 -10   29.04   39.52
  -1 -11 -10   -9.46   44.00
  -1  11 -11  527.55   80.25
  -1 -11 -11  461.91  103.38
   1 -11  11  318.86  121.07
   1 -13 -11   72.13   39.95
  -1 -13  11   23.39   25.27
   1 -13 -10  310.88  156.45
  -1 -13  10  176.59   57.72
  -1  13   9   64.94   20.22
   1  13  -9  111.59   41.07
   1 -13  -9  117.92   46.76
  -1 -13   9   45.56   22.61
  -1  13   8    2.94    4.65
   1  13  -8   21.69   23.42
  -1  13   8   29.99   18.50
  -1 -13   8   -2.00   10.51
   1 -13  -8   58.38   54.32
  -1 -13   8   33.18   22.86
  -1  13   7   15.66   10.56
  -1  13   7    0.63    1.72
   1 -13  -7   74.04   47.23
  -1 -13   7    6.19    9.88
  -1 -13   7  -12.45   24.28
   1  13  -6   24.90   19.03
   1 -13  -6   66.85   43.11
  -1 -13   6   64.12   15.07
  -1 -13   6   20.30   23.98
   1  13  -5  141.86   23.78
   1 -13  -5  104.99   38.38
  -1 -13   5  143.28   26.64
  -1 -13   5  155.74   26.29
   1  13  -4 5007.03  205.57
  -1  13   4 4905.25  217.05
   1 -13  -4 5132.79  278.28
  -1 -13   4 5133.58  200.46
  -1 -13   4 5337.47  218.76
  -1  13   3   81.03   29.91
   1  13  -3  116.67   23.77
   1 -13  -3  212.22   50.43
  -1 -13   3  133.19   23.10
  -1 -13   3   36.48   36.34
  -1 -13   3  116.80   21.58
  -1  13   2 4979.05  172.96
   1  13  -2 4812.19  138.81
  -1  13   2 5071.53  153.54
  -1 -13   2 5462.99  157.09
   1 -13  -2 5614.34  171.64
  -1 -13   2 5109.03  190.43
   1 -13  -2 5402.68  153.59
  -1 -13   2 4880.01  149.87
  -1  13   1 2382.95  112.86
   1  13  -1 2193.07   91.72
   1  13  -1 2244.01   69.53
  -1  13   1 2108.36   68.26
  -1 -13   1 2126.87  123.12
   1 -13  -1 2238.13   69.05
   1  13   0   36.87   19.51
   1  13   0    0.92    9.84
  -1  13   0   33.47   11.01
   1 -13   0   24.87   12.36
  -1 -13   0   37.75   30.69
   1 -13   0   21.89    6.78
   1  13   1  497.22   49.04
   1  13   1  353.97   40.37
  -1  13  -1  381.24   21.86
  -1  13  -1  459.56   83.94
  -1 -13  -1  393.52   73.04
  -1 -13  -1  346.39   69.03
   1 -13   1  390.12   78.86
   1 -13   1  430.45   65.65
   1  13   2  981.19   89.74
   1  13   2  853.38   56.96
  -1  13  -2 1101.56   76.92
  -1  13  -2  851.00   45.24
  -1 -13  -2  819.52   60.06
  -1 -13  -2  789.91   43.80
   1 -13   2  802.13   41.69
   1 -13   2  845.93   37.83
   1  13   3 1460.57   71.33
   1  13   3 1550.53   88.07
  -1  13  -3 1200.65   72.64
  -1  13  -3 1620.69   80.08
  -1 -13  -3 1825.37  223.00
  -1 -13  -3 1721.81   73.32
   1 -13   3 1570.91   80.52
   1 -13   3 1861.33   82.14
   1  13   4 3040.11  128.01
   1  13   4 2725.51  137.11
  -1  13  -4 3022.86  133.52
  -1  13  -4 2902.29  141.42
  -1 -13  -4 3191.18  160.46
  -1 -13  -4 2796.73  110.35
   1 -13   4 2786.64  124.21
   1 -13   4 2500.75  102.50
   1  13   5 1303.10   50.40
  -1  13  -5 1432.19   68.96
  -1 -13  -5 1649.53   96.25
  -1 -13  -5 1424.23   53.46
   1 -13   5 1875.54   89.42
  -1  13  -6   53.35   28.10
   1  13   6   14.76    9.77
  -1 -13  -6   53.42   55.06
   1 -13   6    8.85   12.46
   1 -13   6   51.05   32.49
  -1 -13  -6   15.02    8.78
  -1  13  -7  419.82   98.27
   1  13   7  367.95   78.84
  -1 -13  -7  395.88   74.16
   1 -13   7  176.39   70.04
   1 -13   7  328.57   57.09
  -1 -13  -7  243.98   58.09
   1  13   8  136.11   34.81
  -1  13  -8  143.20   31.18
  -1 -13  -8  127.57   48.53
   1 -13   8  238.46   44.74
  -1  13  -9   46.90   34.67
  -1 -13  -9  110.02   51.70
   1 -13   9   64.11   36.37
  -1  13 -10  693.36   86.24
   1 -13  10  506.07   50.23
   1 -15 -11   24.40   38.62
  -1 -15  11   69.68   35.34
   1  15 -10    6.33   27.80
   1 -15 -10  134.63   35.78
  -1 -15  10   91.74   31.72
   1  15  -9  425.48   72.95
   1 -15  -9  362.70  113.32
  -1 -15   9  443.98   65.43
   1  15  -8  282.94   49.96
   1 -15  -8  442.88  101.97
  -1 -15   8  297.71   53.98
   1  15  -7   79.67   27.27
   1 -15  -7  135.98   61.90
  -1 -15   7  129.18   38.27
   1  15  -6 1808.87  118.41
   1 -15  -6 1609.75  131.14
  -1 -15   6 1393.21   87.98
  -1 -15   6 1580.87  148.10
   1  15  -5 1250.87   60.33
   1 -15  -5 1321.01  151.22
  -1 -15   5 1024.11   39.85
  -1 -15   5 1171.82   60.76
   1  15  -4 1484.72   89.06
  -1  15   4 1673.56  302.93
   1 -15  -4 1582.86  112.96
  -1 -15   4 1606.75   90.94
  -1 -15   4 1529.30  134.40
  -1 -15   4 1573.72  101.50
   1  15  -3  798.11   41.01
  -1  15   3 1074.30   80.89
   1 -15  -3  838.16   67.57
  -1 -15   3  841.15   36.46
  -1 -15   3  835.88   81.40
  -1 -15   3  823.13   47.53
  -1  15   2 3500.77  165.83
   1  15  -2 3928.59  164.70
  -1  15   2 4054.28  175.59
  -1 -15   2 3898.35  163.45
  -1 -15   2 4027.12  205.45
   1 -15  -2 4240.91  185.27
   1 -15  -2 4074.89  169.61
  -1 -15   2 4089.14  179.30
  -1  15   1 1092.69  205.96
   1  15  -1  995.46   51.66
   1  15  -1  979.09   42.06
  -1  15   1 1037.61   49.84
   1 -15  -1  981.25   59.82
  -1 -15   1  939.47  237.09
   1 -15  -1  933.20   52.40
   1  15   0   31.91   22.39
   1  15   0   23.76   10.33
  -1  15   0   32.74   16.21
   1 -15   0   24.64    7.23
  -1 -15   0  -15.44   30.20
   1 -15   0   38.96   16.38
  -1  15  -1  405.45   30.80
   1  15   1  474.19   81.27
  -1 -15  -1  411.69   43.04
   1 -15   1  405.83   31.37
  -1 -15  -1  338.12   37.37
   1 -15   1  422.04   36.05
   1  15   2 6403.26  280.78
   1  15   2 5959.58  267.04
  -1  15  -2 7482.20  314.52
   1 -15   2 6187.34  258.26
  -1 -15  -2 6105.57  304.48
   1 -15   2 6215.27  266.19
   1  15   3   32.00   13.20
   1  15   3   59.52   38.18
  -1  15  -3   25.67   11.87
   1 -15   3   58.47   16.69
  -1 -15  -3   36.96   35.25
  -1 -15  -3   35.61    6.55
   1 -15   3   59.69   20.19
  -1  15  -4    5.87   12.78
   1  15   4   51.39   22.51
  -1 -15  -4   -9.69   34.44
   1 -15   4   31.48    6.95
  -1 -15  -4    6.44    3.36
   1 -15   4   93.91   28.80
  -1  15  -5  114.18   27.81
   1  15   5   63.88   14.97
  -1 -15  -5  106.95   44.67
   1 -15   5   77.10   18.66
   1 -15   5   35.64   21.77
  -1 -15  -5   74.07   18.29
  -1  15  -6 1365.02  140.42
   1  15   6 1605.22  103.38
  -1 -15  -6 1242.48  112.32
   1 -15   6 1235.70   80.27
   1 -15   6 1391.52   96.52
  -1 -15  -6 1203.96   72.38
  -1  15  -7  792.52   77.83
   1  15   7  578.42   82.30
  -1 -15  -7 1093.65  125.45
   1 -15   7  475.17  127.84
   1 -15   7  846.60  116.76
   1  15   8   36.76   10.43
  -1  15  -8   61.63   22.03
  -1 -15  -8   78.19   54.39
   1 -15   8   22.18   21.08
  -1  15  -9   84.50   33.73
  -1 -15  -9  163.31   61.99
   1 -15   9  216.15   36.76
  -1  15 -10   57.68   19.12
  -1 -15 -10    0.85   39.59
   1 -15  10   88.08   25.02
  -1  15 -11   25.94   43.61
  -1 -15 -11   67.85   53.21
   1 -15  11   51.28   25.39
   1 -17 -11   37.44   48.39
  -1 -17  11   51.18   37.00
   1 -17 -10   23.92   56.48
  -1 -17  10   -3.58   24.84
   1 -17  -9   32.81   33.47
  -1 -17   9   16.85   36.16
   1 -17  -8  278.87  146.80
  -1 -17   8  584.46   52.12
   1  17  -7   -0.64   20.70
   1 -17  -7   75.12   47.61
  -1 -17   7   32.22   26.28
   1  17  -6  942.88  115.07
   1 -17  -6  568.62  213.39
  -1 -17   6 1033.32  101.54
   1  17  -5  251.40   50.73
   1 -17  -5  129.71   37.71
  -1 -17   5  245.67   35.53
  -1 -17   5  315.36   69.87
   1  17  -4  964.12   48.46
   1 -17  -4 1261.88   85.84
  -1 -17   4  931.77  125.32
  -1 -17   4 1033.15   60.05
  -1  17   3  111.28   37.59
   1  17  -3  185.67   36.61
  -1  17   3  120.09   19.53
  -1 -17   3  166.15   14.79
  -1 -17   3  241.68   59.56
   1 -17  -3  142.82    3.10
  -1 -17   3  143.92   25.10
  -1  17   2  210.04   30.02
   1  17  -2  197.40   19.91
  -1  17   2  191.39   20.55
  -1 -17   2  179.22   12.37
   1 -17  -2  188.38   28.06
  -1 -17   2  158.24   36.99
   1 -17  -2  171.89   11.06
  -1 -17   2  209.84   38.90
   1  17  -1 1632.68   82.59
  -1  17   1 1973.86  104.47
  -1  17   1 1799.78   83.69
   1  17  -1 1781.09   78.22
  -1 -17   1 1518.74  311.75
   1 -17  -1 1593.91   86.58
   1 -17  -1 1812.56   81.00
  -1 -17   1 1675.33   80.60
  -1  17   0 2151.72  109.58
   1  17   0 2328.52  114.53
   1  17   0 2379.41  104.41
  -1  17   0 2266.78  100.19
  -1 -17   0 2313.76  128.58
   1 -17   0 2351.01  105.37
   1  17   1 1140.83  115.33
  -1  17  -1 1047.90   50.99
   1  17   1  945.86   41.73
   1 -17   1 1097.60   52.56
  -1 -17  -1  991.03  145.54
   1 -17   1  935.28   48.04
  -1  17  -2  309.25   54.49
   1  17   2  327.18   43.72
  -1 -17  -2  270.45   51.63
   1 -17   2  324.94   41.11
  -1 -17  -2  498.13   45.07
   1 -17   2  351.99   72.64
   1  17   3 1688.78  105.36
   1  17   3 1872.51  126.62
  -1  17  -3 1902.21  111.87
   1 -17   3 1806.69  103.45
  -1 -17  -3 1759.76  297.30
  -1 -17  -3 1715.77   97.17
   1 -17   3 1865.27  114.76
   1  17   4  363.83   59.52
  -1  17  -4  466.65  113.68
  -1 -17  -4  333.87   62.61
   1 -17   4  398.17   80.01
  -1  17  -5 2032.78  133.20
   1  17   5 2104.46  130.87
  -1 -17  -5 1996.15  154.41
   1 -17   5 1843.13  116.35
   1 -17   5 1931.76  126.79
  -1 -17  -5 1855.22  110.52
  -1  17  -6  526.95   80.55
   1  17   6  660.55   91.98
  -1 -17  -6  622.82  102.14
   1 -17   6  354.20   65.22
   1 -17   6  634.03   95.58
   1  17   7  244.03   36.94
  -1  17  -7  283.20   48.65
  -1 -17  -7  399.87   88.71
   1 -17   7  305.67   56.10
  -1  17  -8   33.98   28.64
  -1 -17  -8  -69.12   47.18
   1 -17   8   69.75   23.68
  -1  17  -9  494.83   69.24
  -1 -17  -9  447.12   88.37
   1 -17   9  383.20   50.86
  -1  17 -10   16.93   36.21
  -1 -17 -10  131.07   55.55
   1 -17  10   52.97   24.35
  -1 -17 -11  130.34   66.14
   1 -17  11  158.21   39.84
   1 -19 -10  110.36   55.52
  -1 -19  10  121.81   41.87
   1  19  -9   36.51   25.99
   1 -19  -9   68.71   46.15
  -1 -19   9   90.46   40.99
   1  19  -8   87.74   42.46
   1 -19  -8  151.52   81.42
  -1 -19   8  134.22   32.24
   1  19  -7   61.43   31.02
   1 -19  -7  -51.61   51.22
  -1 -19   7   30.82   17.77
   1  19  -6  654.15  110.97
   1 -19  -6  477.27  174.87
  -1 -19   6  653.40   83.31
   1  19  -5  281.21   34.53
   1 -19  -5  259.67   53.94
  -1 -19   5  409.69   43.42
  -1 -19   5  478.21   63.71
   1  19  -4 1110.58   83.02
  -1  19   4  781.80   78.27
  -1 -19   4  997.80   62.28
  -1 -19   4  960.24   71.71
   1  19  -3 3114.77  109.71
  -1  19   3 2901.52  109.64
  -1 -19   3 2813.60   96.76
  -1 -19   3 2598.98  148.23
   1 -19  -3 2600.34   86.39
   1 -19  -3 2615.61   85.30
  -1 -19   3 3254.36  127.92
  -1  19   2   14.36   25.84
   1  19  -2   25.39    9.24
   1  19  -2   32.61   10.49
  -1  19   2   16.81   15.14
   1 -19  -2   31.10   15.70
  -1 -19   2   10.15   30.26
   1 -19  -2   13.72    6.58
  -1 -19   2   15.94   18.12
   1  19  -1 1030.31   64.67
  -1  19   1 1111.68  213.47
   1  19  -1 1046.31   47.69
  -1  19   1 1092.97   51.88
   1 -19  -1  976.04  157.12
  -1 -19   1  948.52  196.72
   1 -19  -1 1117.84   50.60
  -1 -19   1 1163.04   60.27
  -1  19   0 7062.56  319.01
   1  19   0 6946.98  287.53
  -1  19   0 6629.81  262.88
   1  19   0 7051.73  277.65
  -1 -19   0 6991.58  304.03
   1 -19   0 6796.48  269.59
  -1 -19   0 7490.54  297.80
   1  19   1  182.00   35.21
  -1  19  -1  353.68   62.43
   1  19   1  203.63   16.59
   1 -19   1  200.36   20.65
  -1 -19  -1  246.58   31.65
   1 -19   1  272.99   22.70
  -1  19  -2 1909.12  110.63
   1  19   2 2050.59  133.65
  -1 -19  -2 1976.89  134.56
   1 -19   2 2061.85  118.36
  -1 -19  -2 2524.86  159.82
   1 -19   2 2143.15  127.55
  -1  19  -3  916.26  125.36
   1  19   3  653.30  147.37
  -1 -19  -3  901.29  232.52
   1 -19   3  838.92   79.82
  -1 -19  -3 1074.91   42.68
   1 -19   3  908.44  127.35
  -1  19  -4  323.23   85.29
  -1 -19  -4  322.91  122.01
   1 -19   4  295.88   52.09
  -1 -19  -4  336.92   33.20
   1 -19   4  354.35   66.79
  -1  19  -5  146.74   31.89
  -1 -19  -5  161.04   64.85
   1 -19   5  119.60   40.31
  -1 -19  -5  109.63    6.55
   1 -19   5  158.46   34.60
  -1  19  -6  815.91   74.50
  -1 -19  -6 1123.59  124.42
   1 -19   6  933.19   72.97
   1 -19   6 1145.54   99.38
  -1  19  -7  118.33   42.12
  -1 -19  -7   49.29   51.37
   1 -19   7  162.36   48.75
  -1  19  -8  473.96   72.73
  -1 -19  -8  326.26   60.70
   1 -19   8  354.28   55.87
  -1  19  -9  143.32   49.65
  -1 -19  -9  218.84   63.99
   1 -19   9   44.35   28.08
  -1 -19 -10  179.38  124.12
   1 -19  10  241.88   73.31
   1 -21 -10   33.50   40.11
  -1 -21  10   53.99   25.79
   1 -21  -9  -24.81   56.02
  -1 -21   9  128.11   31.00
   1  21  -8   16.17   20.59
  -1 -21   8   42.29   26.27
   1  21  -7  216.52   41.60
   1 -21  -7  268.41   73.84
  -1 -21   7  191.35   41.75
   1  21  -6 1023.31  103.71
   1 -21  -6 1042.57  126.39
  -1 -21   6  939.03  148.12
   1  21  -5   17.06   13.04
  -1  21   5    9.86   17.33
  -1 -21   5   14.44    4.86
  -1 -21   5   -0.65   21.88
   1  21  -4 1152.49   77.29
  -1  21   4 1396.70   93.89
  -1 -21   4 1454.02   88.26
  -1 -21   4 1537.63  105.46
  -1  21   3  111.29   26.92
  -1 -21   3   95.00   16.14
   1 -21  -3   89.97   13.17
  -1 -21   3  101.29   28.65
   1  21  -2   50.64   14.57
  -1  21   2   22.24   29.86
   1  21  -2   70.15   13.64
  -1  21   2   60.47   17.15
   1 -21  -2   55.13   29.17
  -1 -21   2   53.30   47.60
   1 -21  -2   61.54   16.42
  -1 -21   2   62.12   21.04
  -1  21   1  221.89   37.58
   1  21  -1  270.50   28.90
  -1  21   1  296.00   66.83
   1 -21  -1  225.98   60.51
  -1 -21   1  133.18   38.90
   1 -21  -1  230.48   36.84
  -1 -21   1  321.71   76.54
  -1  21   0 2816.93  119.55
   1  21   0 3052.73  126.39
   1  21   0 3195.05  113.53
  -1  21   0 2997.60  107.50
   1 -21   0 3032.19  139.56
  -1 -21   0 2985.29  406.57
   1 -21   0 3098.27  118.96
  -1 -21   0 3342.86  121.78
   1  21   1  112.15   27.80
  -1  21  -1  159.00   24.26
   1  21   1  132.77   13.87
   1 -21   1  171.87   34.94
  -1 -21  -1  101.59   26.07
   1 -21   1  164.25   18.85
  -1 -21  -1  217.19   26.54
   1  21   2   86.02   29.54
  -1  21  -2  296.18   63.52
   1  21   2  201.34   41.26
   1 -21   2  225.04   26.65
  -1 -21  -2  256.48   35.74
   1 -21   2  266.95   49.68
  -1 -21  -2  240.25   26.45
  -1  21  -3   19.26   13.95
  -1 -21  -3   57.79   29.22
   1 -21   3   43.70   11.52
   1 -21   3   45.84   22.79
  -1 -21  -3   50.22   11.35
  -1  21  -4   14.15   14.15
  -1 -21  -4   64.67   39.45
   1 -21   4   33.88    9.61
  -1 -21  -4   72.45   11.96
   1 -21   4   70.85   32.29
  -1 -21  -4   76.46   17.36
  -1  21  -5   24.17   20.02
  -1 -21  -5   25.87   33.45
   1 -21   5   14.30    8.01
   1 -21   5   34.78   22.60
  -1  21  -6  733.55   76.73
  -1 -21  -6  766.62  232.04
   1 -21   6  888.50   93.94
  -1 -21  -7   56.19   34.02
   1 -21   7  126.90   40.82
  -1  21  -8    2.60   23.89
  -1 -21  -8   61.31   48.20
   1 -21   8  107.14   37.95
  -1  21  -9    3.59   32.52
  -1 -21  -9   17.88   32.75
   1 -21   9   37.99   30.79
  -1 -21 -10   11.03   37.77
   1 -21  10   37.86   17.28
   1 -23 -10   28.44   66.13
  -1 -23  10    9.54   29.66
   1 -23  -9   61.01   53.35
  -1 -23   9   64.36   32.84
   1 -23  -8  108.94   53.28
  -1 -23   8   73.81   30.89
   1  23  -7   59.59   17.72
   1 -23  -7   90.15   43.81
  -1 -23   7   29.77   18.64
  -1  23   6  141.68   25.72
  -1 -23   6  155.36   42.95
  -1  23   5 1037.73   85.78
  -1 -23   5  838.99   65.57
  -1 -23   5  951.94   82.95
   1  23  -4   11.34    9.03
  -1  23   4  114.82   21.12
  -1 -23   4   27.35   10.80
  -1 -23   4   15.93   13.22
   1  23  -3 1189.84   82.00
   1  23  -3 1168.56   74.32
  -1  23   3 1142.39   77.07
   1 -23  -3 1022.55   61.82
  -1 -23   3 1080.06   76.82
   1  23  -2  207.39   55.31
   1  23  -2  278.44   29.77
  -1  23   2  327.88   50.74
   1 -23  -2  168.36   33.84
   1 -23  -2  331.84   33.82
  -1 -23   2  204.49   40.48
   1  23  -1  167.17   34.33
   1  23  -1  140.93   43.30
  -1  23   1  142.57   26.18
  -1 -23   1  162.88   47.96
   1 -23  -1  107.98   39.53
   1 -23  -1  150.21   25.27
  -1 -23   1  189.47   32.98
  -1  23   0  784.95  187.61
   1  23   0  983.88   79.12
  -1  23   0 1288.14   82.71
   1  23   0 1056.07   68.61
   1 -23   0  813.13  175.02
  -1 -23   0  885.18  257.43
   1 -23   0  972.73   69.85
  -1 -23   0 1076.85   72.67
  -1  23  -1 3301.80  210.18
   1  23   1 3149.65  205.46
  -1  23  -1 3496.73  210.80
   1  23   1 3624.37  219.16
   1 -23   1 3513.82  242.09
  -1 -23  -1 3066.30  199.05
   1 -23   1 3696.13  225.23
  -1 -23  -1 3526.22  212.79
  -1  23  -2  135.77   26.12
   1  23   2  221.82   32.04
   1 -23   2  173.13   23.92
  -1 -23  -2  130.85   29.96
   1 -23   2  185.49   30.81
  -1 -23  -2  149.19   38.31
  -1  23  -3  147.04   30.01
   1  23   3  167.93   26.36
   1 -23   3  171.65   24.40
  -1 -23  -3  181.31   28.08
   1 -23   3  192.97   44.17
  -1 -23  -3  128.98   34.47
  -1  23  -4  100.25   34.07
  -1 -23  -4  120.94   38.32
   1 -23   4  104.89   30.92
  -1 -23  -4   97.14   23.67
   1 -23   4  150.93   38.66
  -1 -23  -4  104.37    7.66
  -1  23  -5  125.21   42.42
  -1 -23  -5   90.81   62.34
   1 -23   5   53.17   17.81
   1 -23   5  154.49   34.81
  -1  23  -6   41.09   20.91
  -1 -23  -6   93.00   40.25
   1 -23   6   83.27   27.76
  -1  23  -7  587.16  181.15
  -1 -23  -7  417.37  194.12
   1 -23   7  800.40  179.97
  -1  23  -8   37.35   30.06
  -1 -23  -8   53.33   44.14
   1 -23   8   75.41   28.97
  -1 -23  -9    3.15   27.66
   1 -23   9   15.53   27.93
  -1 -23 -10   78.47   30.69
   1 -23  10    3.57   23.96
  -1  25   9   16.30   23.36
  -1 -25   9   79.50   29.75
  -1 -25   8   57.77   30.68
  -1  25   7  164.83   44.48
  -1 -25   7  199.31   36.96
   1  25  -6  570.78   36.21
  -1  25   6  595.79  106.76
  -1 -25   6  579.34  145.81
   1  25  -5  221.81   52.10
  -1  25   5  188.06   63.16
  -1 -25   5  282.32   56.20
   1  25  -4  196.95   65.36
  -1  25   4  186.50   39.13
  -1 -25   4  200.30   37.90
  -1 -25   4  322.15   71.33
   1  25  -3  126.73   43.41
   1  25  -3  286.32   65.93
  -1  25   3  202.33   35.80
   1 -25  -3  293.56   57.36
   1 -25  -3  186.68   32.72
  -1 -25   3  246.30   46.88
   1  25  -2  794.34   84.87
   1  25  -2  966.43   88.11
  -1  25   2  923.30  102.90
   1 -25  -2  724.13   75.20
   1 -25  -2 1012.58   91.71
  -1 -25   2  995.05   97.60
   1  25  -1  773.02   52.06
  -1  25   1  863.07   62.30
   1 -25  -1  712.94   73.50
  -1 -25   1  834.15   86.87
   1 -25  -1  765.16   55.26
  -1 -25   1  956.61  123.78
   1  25   0  964.67  226.31
  -1  25   0 1583.58  101.59
   1  25   0 1626.70  102.59
  -1 -25   0 1550.71  124.21
   1 -25   0 1653.46  110.05
  -1 -25   0 1589.14  103.62
  -1  25  -1 1115.25  233.65
  -1  25  -1 1699.59  105.22
   1  25   1 1788.50  111.95
  -1 -25  -1 1438.88  108.08
   1 -25   1 1753.42  112.27
  -1 -25  -1 1740.93  108.90
  -1  25  -2 1238.12  113.12
   1  25   2 1184.84  109.24
   1 -25   2 1074.75   98.27
  -1 -25  -2 1115.00  186.81
   1 -25   2 1171.96  175.53
  -1 -25  -2 1352.00  121.99
  -1  25  -3 1337.97  105.85
   1  25   3 1317.28  106.00
   1 -25   3 1337.79  102.91
  -1 -25  -3 1149.39   88.66
   1 -25   3 1366.41  112.06
  -1 -25  -3 1356.98  102.49
  -1  25  -4  164.94   32.25
   1 -25   4   91.00   15.64
  -1 -25  -4   89.84   12.41
   1 -25   4  114.84   30.49
  -1 -25  -4   78.50    7.45
  -1  25  -5  466.25  122.78
  -1 -25  -5  512.68   85.46
   1 -25   5  444.57   63.40
  -1  25  -6  420.20  103.53
  -1 -25  -6  368.02  175.60
   1 -25   6  652.17   87.71
  -1 -25  -7   73.56   48.03
   1 -25   7   51.68   33.28
  -1  25  -8  126.42   33.47
  -1 -25  -8  209.79   96.72
   1 -25   8  201.34   42.12
  -1 -25  -9   17.56   25.08
   1 -25   9   63.79   27.15
  -1  27   9   43.27   12.02
  -1 -27   9   14.71   28.28
  -1  27   8  150.62   40.32
  -1  27   7   14.70   25.95
  -1 -27   7   32.91   31.44
   1  27  -6    8.95    8.05
  -1  27   6   36.37   22.75
  -1 -27   6   18.12   17.28
   1  27  -5   41.97   16.02
  -1  27   5   54.46   31.30
  -1 -27   5   99.39   26.30
   1  27  -4  474.53  120.14
   1  27  -4  633.92   75.15
  -1  27   4  862.04  101.92
  -1 -27   4  797.05  159.61
   1  27  -3 1147.04  109.19
  -1  27   3 1240.07  120.13
   1 -27  -3 1364.92  131.72
   1 -27  -3  997.82   91.90
  -1 -27   3 1222.98  123.19
   1  27  -2   40.31   21.64
   1  27  -2   96.50   22.23
  -1  27   2   89.55   27.00
   1 -27  -2   93.07   22.05
  -1 -27   2  127.60   37.98
   1  27  -1  929.57   86.07
   1  27  -1 1172.29   90.74
  -1  27   1 1003.56   80.75
   1 -27  -1 1114.31  206.63
   1 -27  -1 1019.40   82.05
  -1 -27   1 1001.33  112.04
  -1  27   0   27.51   14.73
   1  27   0   21.40    9.41
   1 -27   0   11.33   30.36
  -1 -27   0  -29.91   34.79
   1 -27   0   19.33   11.26
  -1 -27   0   -2.59   16.98
  -1  27  -1  314.00   42.00
   1  27   1  506.71   62.79
  -1 -27  -1  206.97   61.05
   1 -27   1  268.33   73.35
  -1 -27  -1  264.23   37.72
  -1  27  -2   10.80   12.06
   1  27   2   75.64   27.22
  -1 -27  -2   53.19   32.81
   1 -27   2   21.42   16.10
  -1 -27  -2   21.48   12.35
  -1  27  -3   19.33   11.73
   1  27   3    7.03   12.84
  -1 -27  -3   -3.42    7.21
  -1 -27  -3   10.75    4.19
   1 -27   3   26.67   17.02
  -1  27  -4   30.38   18.80
   1  27   4   65.46   20.53
  -1 -27  -4   31.44    6.35
   1 -27   4    5.10   22.82
  -1  27  -5  108.98   34.00
   1  27   5   58.39   19.52
   1 -27   5   90.75   24.53
  -1  27  -6  303.02  105.84
  -1 -27  -6  307.76   77.18
   1 -27   6  449.80   60.23
  -1  27  -7  126.28   33.23
  -1 -27  -7   85.41   56.03
   1 -27   7  121.65   43.95
  -1 -27  -8    2.43   29.96
   1 -27   8   71.70   44.67
  -1 -27  -9    8.11   30.73
   1 -27   9   51.16   29.49
  -1  29   8   12.78   16.35
  -1 -29   8   39.34   35.96
  -1  29   7   24.00   22.30
  -1 -29   7   -5.51   24.70
  -1  29   6    6.92   22.99
  -1 -29   6   80.03   39.94
   1  29  -5    9.83    9.67
  -1  29   5   41.28   30.11
  -1 -29   5   26.06   24.77
  -1  29   4   21.73   18.43
  -1 -29   4   24.23   24.70
   1  29  -3  608.98   79.37
   1  29  -3  892.44  101.42
  -1  29   3  815.63   94.45
   1 -29  -3  922.20  100.85
  -1 -29   3  834.61  102.01
   1  29  -2   41.14   19.74
  -1  29   2   51.79    9.38
   1 -29  -2   22.27   21.00
  -1 -29   2  109.89   36.30
   1 -29  -2   79.84   27.05
   1  29  -1  233.39   60.11
  -1  29   1  295.38   68.69
   1 -29  -1  195.73   52.94
  -1 -29   1  268.74   70.86
   1 -29  -1  255.27   52.11
  -1  29   0    7.49   12.76
   1  29   0   20.43   12.92
   1 -29   0    5.17   25.66
   1 -29   0    6.33   13.91
  -1 -29   0   49.61   24.65
  -1  29  -1  128.51   26.41
   1  29   1  111.32   36.58
   1 -29   1  122.60   22.10
  -1 -29  -1   90.83   31.11
  -1  29  -2   47.09   12.52
   1  29   2   37.59   14.88
  -1 -29  -2   78.16   26.04
  -1 -29  -2   33.19   14.71
   1 -29   2   18.90   23.36
  -1  29  -3   45.69   15.69
   1  29   3   23.82   18.44
  -1 -29  -3   30.90   11.70
   1 -29   3   36.39   22.10
  -1  29  -4   19.61    7.97
   1  29   4  -14.06   16.96
   1 -29   4   32.52   22.03
  -1  29  -5   23.78   16.15
   1  29   5   20.76   21.27
   1 -29   5  -13.68   24.63
  -1  29  -6   22.64   10.59
   1  29   6   50.43   22.32
   1 -29   6   48.15   19.37
   1 -29   7   60.62   25.75
  -1 -29  -8  -20.93   46.41
   1 -29   8   -9.88   33.50
  -1 -31   8  226.33   66.73
  -1  31   7   28.84   22.55
  -1 -31   7   46.17   30.05
  -1  31   6   33.38   29.27
  -1 -31   6   16.36   26.31
  -1  31   5   49.11   21.46
  -1 -31   5   34.20   29.67
   1  31  -4  336.10   65.93
  -1  31   4  581.22   53.60
  -1 -31   4  574.52  110.81
  -1  31   3   33.71   18.06
  -1 -31   3   62.26   24.91
   1  31  -2  620.18   29.10
  -1  31   2  697.21   35.79
  -1 -31   2  899.95   46.92
   1 -31  -2  756.97   28.19
   1  31  -1   25.40   12.11
  -1  31   1   15.68   14.98
  -1 -31   1   14.38   18.28
   1 -31  -1   29.95   12.48
  -1  31   0   31.31   15.65
   1  31   0   25.32   12.07
   1 -31   0   15.21    8.47
  -1 -31   0    1.90   16.46
  -1  31  -1   23.98    9.11
   1  31   1   19.86   14.16
   1 -31   1   22.42   17.30
  -1 -31  -1   29.93   14.51
  -1  31  -2  134.25   38.78
   1  31   2  124.95   32.23
  -1 -31  -2  136.10   52.39
   1 -31   2  151.50   33.38
  -1  31  -3  253.72   76.74
   1  31   3  279.56   53.65
   1 -31   3  329.87   35.58
  -1 -31  -3  348.40   44.17
  -1  31  -4  693.81   97.43
   1  31   4 1021.64   85.75
   1 -31   4 1008.28   97.86
  -1  31  -5   49.47   24.04
   1  31   5   14.69   19.99
   1 -31   5   44.62   26.07
   1  31   6   48.81   35.98
   1 -31   6   70.95   30.98
   1  31   7   51.04   26.69
   1 -31   7   53.14   37.37
  -1  33   7   39.68   23.59
  -1 -33   7   -7.32   27.03
  -1  33   6  134.10   48.31
  -1 -33   6  175.67   71.71
  -1  33   4   35.75   13.60
  -1 -33   4   17.43   35.51
   1  33  -3  322.25  101.77
  -1  33   3  222.53   82.28
  -1 -33   3  285.25  103.16
   1  33  -2   36.06   19.50
  -1  33   2   31.54   19.39
   1 -33  -2   10.83    8.76
  -1 -33   2   10.42   22.52
   1  33  -1  105.52   18.48
  -1  33   1  108.69   48.69
  -1 -33   1   87.25   52.39
   1 -33  -1  128.57   21.30
   1  33   0  140.55   49.20
  -1  33   0  159.35   52.21
  -1 -33   0  183.75   31.87
   1 -33   0  211.44   29.87
  -1  33  -1   30.66   17.82
   1  33   1   18.05   15.24
  -1 -33  -1   19.79   11.94
   1 -33   1   17.54   22.69
  -1  33  -2    9.40   12.93
   1  33   2    7.49   16.66
   1 -33   2    4.98   19.53
  -1 -33  -2   13.11   11.51
  -1  33  -3 1133.02   87.79
   1  33   3 1420.98   60.12
   1 -33   3 1357.59   57.76
  -1  33  -4   58.96   20.01
   1  33   4  108.28   23.62
   1 -33   4   98.31   33.71
  -1  33  -5   73.33   24.40
   1  33   5   75.73   27.46
   1 -33   5  192.66   42.31
   1  33   6   29.06   28.37
   1 -33   6   31.87   26.83
   1  33   7  -20.84   27.01
   1 -33   7    7.15   31.21
  -1  35   6   28.39   22.69
  -1 -35   6   80.21   31.40
  -1  35   5   49.82   17.78
  -1 -35   5   32.42   33.33
  -1  35   4   -0.61    8.60
  -1 -35   4   41.66   24.08
   1  35  -3   44.05   15.20
  -1  35   3   62.76   15.34
  -1 -35   3  173.82   41.77
   1  35  -2  226.47   71.02
  -1  35   2  132.70   66.96
  -1 -35   2  276.28  107.23
  -1  35   1   45.23   17.24
   1  35  -1    7.39   12.10
   1 -35  -1    7.46    6.61
  -1 -35   1   14.59   19.07
  -1  35   0  107.06   26.00
   1  35   0   34.37   13.95
   1 -35   0  108.55   24.51
  -1  35  -1   16.28   15.09
   1  35   1   46.95   21.41
   1 -35   1    0.02   16.63
  -1 -35  -1   25.58    6.77
  -1  35  -2   25.12   15.76
   1  35   2   16.26   15.35
   1 -35   2  101.33   30.99
   1  35   3  102.87   34.91
   1 -35   3   57.53   25.58
   1  35   4   56.81   22.47
   1 -35   4   72.27   32.59
   1  35   5   -9.87   23.57
   1 -35   5   21.46   28.97
   1 -35   6   46.20   28.45
  -1  37   5   45.27   29.12
  -1 -37   5   63.26   22.42
  -1 -37   4   58.73   27.24
  -1  37   3   12.30   21.23
  -1 -37   3   21.73   22.76
  -1  37   2   19.81   18.61
  -1 -37   2   68.96   34.48
   1  37  -1   12.90   12.53
  -1  37   1   20.93    8.96
  -1 -37   1   18.92   27.65
  -1  37   0  200.44   72.33
   1  37   0  224.28   73.84
  -1  37  -1   -3.50   12.40
   1  37   1    9.22   11.13
   1 -37   1   12.96   19.98
  -1  37  -2   52.73   21.56
   1  37   2   33.30   11.47
   1 -37   2  103.62   32.16
  -1  37  -3   13.76   18.15
   1  37   3   24.00   13.65
   1 -37   3   16.49   21.49
   1  37   4    0.05   17.93
  -1  39   3   22.64   15.38
  -1 -39   3   24.22   17.23
  -1  39   2   51.66   17.49
  -1 -39   2   51.38   27.47
  -1  39   1    7.54   12.93
   1  39  -1   16.45   13.36
  -1  39   0   18.38    8.92
   1  39   1  132.65   67.01
  -1  39  -1   97.02   21.87
  -1  39  -2   -3.10   20.29
   1  39   2   20.04   22.36
   1 -39   2   11.26   19.63
   1  39   3   28.70   17.80
   1 -39   3   32.25   24.44
   2   0 -12   63.65   42.79
  -2   0  12   -8.29   13.58
   2   0 -11    2.79   39.48
  -2   0  11   26.65   17.52
   2   0 -10  279.59   57.46
  -2   0  10  219.79   25.24
   2   0  -9   40.70   35.61
  -2   0   9   46.54   16.92
   2   0  -8  297.70   64.71
  -2   0   8  157.77   45.43
  -2   0   8  300.04   63.14
   2   0  -7   77.98   50.99
  -2   0   7    2.35   23.03
  -2   0   7   23.98   17.37
  -2   0   7   26.00   17.38
   2   0  -6  717.34   97.26
  -2   0   6  656.70   36.89
  -2   0   6  666.26   54.67
  -2   0   6  801.78   84.42
   2   0  -5   33.70   29.56
  -2   0   5   27.90   22.74
  -2   0   5    5.98   12.96
  -2   0   5   27.75   14.87
   2   0  -4 9870.61  297.64
  -2   0   410498.00  311.78
  -2   0   4 9707.63  303.49
   2   0  -3   38.50   25.68
  -2   0   3   31.83   15.02
  -2   0   3   32.62   24.78
  -2   0   251471.38 1931.94
  -2   0   247130.19 1764.68
   2   0  -250606.71 1908.05
  -2   0   244304.80 1040.21
   2   0  -1   51.92   23.70
  -2   0   1   -4.94   23.27
   2   0   0 9581.02  226.24
  -2   0   0 8615.55  204.32
  -2   0   0 8202.29  194.34
   2   0   1    7.63   21.02
  -2   0  -1   21.37   18.99
   2   0   1    7.31   12.48
  -2   0  -1    8.10    8.30
  -2   0  -216569.34  403.85
   2   0   214488.70  350.10
   2   0   215648.56  368.60
  -2   0  -215358.52  362.00
  -2   0  -3   78.05   32.35
   2   0   3   36.01   24.88
   2   0   3   -4.55   11.87
  -2   0  -3  -13.10   11.84
  -2   0  -4 4228.96  147.47
   2   0   4 4017.12  134.90
   2   0   4 4499.80  136.58
  -2   0  -4 4625.56  140.71
  -2   0  -5   75.09   35.17
   2   0   5  -13.76   21.36
   2   0   5   17.04   14.34
  -2   0  -5   -1.79    7.87
  -2   0  -6 2461.26  173.53
   2   0   6 2459.30  113.47
   2   0   6 2630.25   98.51
  -2   0  -6 2300.05  176.37
  -2   0  -7   18.10   39.13
   2   0   7   11.65    6.16
  -2   0  -8   39.80   42.10
   2   0   8    5.79   13.93
  -2   0  -9  127.02   53.29
   2   0   9   23.10   12.93
  -2   0 -10   59.04   47.95
  -2   0 -11   54.91   39.23
   2   0  11   -2.46   18.01
   2   2 -12   30.27   36.96
   2  -2 -12    8.03   48.92
  -2  -2  12    4.61   12.21
   2   2 -11   82.81   42.54
   2  -2 -11   97.75   42.94
  -2  -2  11   91.53   26.70
   2   2 -10  317.33   60.06
   2  -2 -10  379.51   70.24
  -2  -2  10  301.57  106.68
  -2   2   9  151.60   25.34
   2   2  -9   69.98   33.84
   2  -2  -9  205.47   46.08
  -2  -2   9  133.59   22.74
   2   2  -8 1440.60  144.84
  -2   2   8  723.26  260.83
  -2   2   8 1641.36  149.99
   2  -2  -8 1720.67  173.68
  -2  -2   8 1309.17  158.80
  -2  -2   8 1645.86  173.97
   2   2  -7   55.48   34.08
  -2   2   7   50.60   20.78
  -2  -2   7   51.92   36.01
  -2  -2   7   69.18   26.64
  -2  -2   7   16.39   19.51
  -2   2   6   58.17   23.51
   2   2  -6   23.72   22.20
  -2   2   6   28.14   13.33
  -2   2   6   20.82   19.83
   2  -2  -6  -10.85   26.82
  -2  -2   6   67.31   22.47
  -2  -2   6   62.66   42.32
  -2  -2   6   42.32   21.35
  -2   2   5  754.94   74.88
   2   2  -5  670.53   59.19
  -2   2   5  736.71   65.21
  -2   2   5  767.51   74.14
  -2  -2   5  692.89   56.34
  -2  -2   5  586.84   71.06
   2  -2  -5  737.33   67.96
  -2  -2   5  607.43   47.49
  -2   2   4 3633.71  131.89
   2   2  -4 3344.74  112.83
  -2   2   4 3347.93  116.51
  -2   2   4 3446.29  104.54
  -2  -2   4 3171.08  104.68
  -2  -2   4 3305.27  194.95
   2  -2  -4 3301.52  120.37
  -2   2   3 1638.57  106.37
   2   2  -3 1698.66  110.13
  -2   2   3 1830.14  121.83
   2  -2  -3 1715.79  117.44
  -2  -2   3 1673.12  116.93
  -2  -2   3 1765.76  110.79
   2   2  -220103.28  475.71
  -2   2   220788.09  495.25
   2   2  -220069.03  494.73
  -2   2   220493.58  478.35
  -2   2   221294.66  505.91
   2  -2  -221788.97  523.92
  -2  -2   221185.33  498.40
  -2  -2   222797.18  557.11
  -2   2   1 1701.52  103.33
   2   2  -1 1508.71   89.63
  -2   2   1 1465.76   88.43
   2   2  -1 1380.87  137.73
  -2  -2   1 1320.07   78.45
  -2  -2   1 1443.97   97.28
   2  -2  -1 1416.42   85.30
   2  -2  -1 1246.46   77.76
   2   2   0 3771.97   95.23
  -2   2   0 3407.64   84.70
  -2  -2   0 3296.18   84.77
  -2  -2   0 3431.25   88.69
   2  -2   0 3399.57   83.68
   2  -2   0 3291.89   81.35
   2   2   1 8676.12  211.63
   2   2   1 9354.49  222.03
  -2   2  -1 9785.08  232.31
  -2  -2  -110069.51  237.99
  -2   2  -220272.37  495.22
   2   2   222558.99  527.45
  -2   2  -222421.60  526.05
   2  -2   223742.86  562.95
  -2  -2  -222023.44  530.95
   2  -2   222017.73  516.38
  -2  -2  -221774.94  509.25
  -2   2  -3 1016.13   74.96
   2   2   3  976.82   73.05
   2   2   3  899.17   58.22
  -2   2  -3  812.78   53.92
  -2  -2  -3  795.38   62.36
  -2  -2  -3  894.06   56.73
   2  -2   3  918.12   61.45
   2  -2   3  923.65   92.55
   2   2   4 1276.68   75.36
   2   2   4 1078.71   74.50
  -2   2  -4 1357.13   70.07
  -2   2  -4 1128.12   78.56
   2  -2   4 1288.95   49.74
  -2  -2  -4 1385.20   75.36
  -2  -2  -4 1287.71   49.37
   2  -2   4 1225.86   87.47
  -2   2  -5 3049.15  147.68
   2   2   5 3284.98  135.39
   2   2   5 3385.19  155.91
  -2   2  -5 3276.96  136.91
   2  -2   5 3034.03  136.09
  -2  -2  -5 2891.22  144.56
   2  -2   5 2994.54  137.68
  -2  -2  -5 2896.97  120.24
   2   2   6   88.83   14.20
  -2   2  -6   73.10   30.67
   2   2   6   37.96   23.83
  -2   2  -6   58.83   13.59
  -2  -2  -6   74.33   41.26
   2  -2   6   68.36   20.69
  -2  -2  -6   50.63   13.98
   2  -2   6   59.85   25.80
  -2   2  -7 1924.94  141.27
   2   2   7 2055.09  127.07
  -2  -2  -7 2186.71  159.59
   2  -2   7 1945.20  122.05
  -2   2  -8   88.86   54.69
   2   2   8   35.61    8.55
   2  -2   8   49.53   18.09
  -2  -2  -8  -32.09   47.27
   2   2   9    9.91    9.09
  -2   2  -9   44.46   64.37
  -2  -2  -9   60.79   41.21
   2  -2   9   42.89   23.57
   2   2  10   17.68   13.68
  -2   2 -10   97.09   53.98
  -2  -2 -10  -24.85   51.47
   2  -2  10   44.25   17.37
   2   2  11   16.27   17.52
  -2   2 -11   48.66   45.14
  -2  -2 -11   42.50   45.63
   2  -2  11   46.59   12.34
  -2   2 -12   43.30   38.76
  -2  -2 -12   76.79   49.97
   2   4 -12   97.06   60.00
   2  -4 -12   61.72   45.37
  -2  -4  12   58.19   19.91
   2   4 -11  -15.97   31.25
   2  -4 -11   34.93   52.62
  -2  -4  11   29.84   19.43
  -2   4  10  337.47   54.29
   2   4 -10  466.12   82.27
   2  -4 -10  299.40   61.90
  -2  -4  10  240.12   33.87
   2   4  -9  349.08   69.91
  -2   4   9  326.86   54.64
  -2  -4   9  413.45   63.71
   2  -4  -9  434.42   82.66
  -2   4   8 1064.82   98.41
   2   4  -8 1022.59  112.88
  -2   4   8  555.86  171.47
  -2  -4   8  810.60   83.32
   2  -4  -8 1132.96  127.00
  -2  -4   8 1071.76  153.46
  -2   4   7  272.59   88.54
   2   4  -7  402.72   53.58
  -2   4   7  436.60   60.01
  -2   4   7  499.42   54.80
  -2  -4   7  354.75   99.94
   2  -4  -7  300.20   47.85
  -2  -4   7  450.77   50.43
  -2   4   6 4159.62  249.11
   2   4  -6 4249.16  247.69
  -2   4   6 4846.07  286.30
  -2   4   6 4233.84  236.25
  -2  -4   6 4749.68  272.32
  -2  -4   6 3505.29  225.60
   2  -4  -6 4001.22  240.39
  -2  -4   6 4575.64  259.90
  -2   4   5   13.55   14.60
   2   4  -5   20.88   17.04
  -2   4   5    7.01   23.54
  -2   4   5    0.98    9.13
   2  -4  -5   -4.85   28.83
  -2  -4   5   80.87   48.53
  -2  -4   5   26.56   14.49
  -2  -4   5   24.75   26.90
  -2   4   4 2576.17   98.12
   2   4  -4 2499.93   87.56
  -2   4   4 2402.60  139.05
  -2   4   4 2453.58   80.16
  -2  -4   4 2489.44   83.94
  -2  -4   4 2378.93  107.77
   2  -4  -4 2392.20   99.62
  -2   4   3 6056.17  165.78
  -2   4   3 5406.97  145.28
   2   4  -3 5999.54  151.11
  -2  -4   3 6028.04  157.84
  -2  -4   3 6586.69  194.89
   2  -4  -3 6009.55  167.68
  -2   4   2 8408.47  215.08
   2   4  -2 8311.85  196.75
  -2   4   2 8101.77  194.61
   2   4  -2 8402.62  240.67
  -2  -4   2 8046.70  190.24
  -2  -4   2 8704.43  237.06
   2   4  -1   63.81   38.94
   2   4  -1   64.48    8.90
  -2   4   1   44.30    8.60
  -2   4   1   55.77   11.07
   2  -4  -1   48.93    9.88
  -2  -4   1   57.41    8.45
   2  -4  -1   47.49   15.88
  -2  -4   1   69.23   29.73
  -2   4   0 6395.72  152.82
  -2   4   0 5049.61  122.20
  -2  -4   0 6478.41  159.59
  -2   4  -112271.65  292.69
   2   4   113381.97  324.70
  -2   4  -112510.01  296.31
   2   4   114754.88  350.57
  -2  -4  -112829.03  313.96
   2  -4   112545.96  296.69
  -2  -4  -111833.76  278.75
  -2   4  -232748.22  772.82
   2   4   230851.84  733.25
  -2   4  -231125.26  727.84
   2   4   229759.71  692.91
  -2  -4  -229635.46  706.11
   2  -4   231073.77  726.22
  -2  -4  -230660.70  713.44
   2   4   312424.86  314.60
  -2   4  -310868.77  273.33
   2   4   312850.73  305.01
  -2   4  -311889.73  287.14
   2  -4   312012.85  290.00
  -2  -4  -312251.45  290.88
   2   4   4 2506.72   78.98
  -2   4  -4 2784.27  150.97
   2   4   4 2422.77  114.01
  -2   4  -4 2749.69   92.09
   2  -4   4 2567.88   91.86
   2  -4   4 2424.62   82.63
  -2  -4  -4 2299.96  100.26
  -2  -4  -4 2561.76   82.37
  -2   4  -5 1859.70   98.33
   2   4   5 2581.97  129.45
  -2   4  -5 1923.89   85.39
   2   4   5 2071.92   87.82
  -2  -4  -5 2031.30  111.60
   2  -4   5 2392.81  112.50
   2  -4   5 2202.50   99.16
  -2  -4  -5 1976.75   84.91
  -2   4  -6 1344.13   79.81
   2   4   6 1486.01   93.82
  -2   4  -6 1362.30   61.12
  -2  -4  -6 1463.52   94.48
   2  -4   6 1450.24   62.63
  -2  -4  -6 1381.92   56.09
   2   4   7 1188.85   86.03
  -2   4  -7 1295.23  102.23
  -2  -4  -7 1357.51  113.47
   2  -4   7 1123.69  100.80
  -2   4  -8   26.23   41.53
   2   4   8    3.93   12.59
   2  -4   8    9.95   15.75
  -2  -4  -8  -22.17   39.93
  -2  -4  -8   17.46    8.69
  -2   4  -9  171.31   52.06
   2   4   9  229.06   38.70
  -2  -4  -9  156.08   58.67
   2  -4   9  263.79   54.73
  -2   4 -10   49.44   43.96
   2   4  10   39.60   18.19
   2  -4  10    6.78   10.06
  -2  -4 -10   35.04   48.49
   2   4  11  216.22   28.75
  -2   4 -11  168.81   73.58
  -2  -4 -11  219.05   72.19
   2  -4  11  185.05   23.86
   2   6 -12   27.58   25.16
   2  -6 -12   44.15   25.53
   2   6 -11  110.37   39.74
  -2   6  11   58.34   31.09
  -2  -6  11  200.15   31.87
  -2   6  10   36.43   14.34
   2   6 -10   75.10   39.26
   2  -6 -10  106.20   52.83
  -2  -6  10   93.55   29.40
  -2   6   9   74.00   33.86
   2   6  -9   97.14   47.67
  -2   6   9   43.23   15.34
   2  -6  -9   58.92   38.16
  -2  -6   9   21.77   10.53
   2   6  -8 1245.46  126.45
  -2   6   8 1307.70  118.63
   2  -6  -8 1211.78  129.54
  -2  -6   8  963.01   95.42
  -2  -6   8 1266.22  131.91
  -2   6   7  277.94   30.40
   2   6  -7  302.30   47.04
  -2   6   7  206.83   74.54
  -2  -6   7  222.58   42.42
   2  -6  -7  275.42   50.54
  -2  -6   7  399.32   56.33
  -2   6   6  631.96   56.51
  -2   6   6  704.70   45.89
   2   6  -6  567.95   33.04
  -2   6   6  626.10   21.48
  -2  -6   6  536.76   76.71
  -2  -6   6  618.09   58.60
   2  -6  -6  587.54   53.48
  -2  -6   6  648.59   38.93
  -2   6   5 5538.08  231.77
   2   6  -5 5470.18  238.99
  -2   6   5 5341.47  231.20
  -2   6   5 5296.00  207.79
  -2  -6   5 5008.12  202.23
  -2  -6   5 5517.82  253.93
   2  -6  -5 5461.61  251.89
  -2  -6   5 5602.45  228.15
   2   6  -4   15.41   12.34
  -2   6   4   40.62   31.20
  -2   6   4   29.26    8.91
  -2   6   4   45.95   14.76
   2  -6  -4   50.92   18.61
  -2  -6   4   22.47   10.31
  -2  -6   4   59.14   50.20
  -2   6   3  236.96   28.40
  -2   6   3  396.89   34.19
   2   6  -3  287.46   24.60
  -2  -6   3  298.95   24.02
  -2  -6   3  376.94   86.13
   2  -6  -3  220.53  108.73
  -2   6   2 6726.01  181.05
  -2   6   2 6680.95  163.63
   2   6  -2 6380.75  190.32
  -2   6   2 6551.83  153.97
   2  -6  -2 7222.70  177.24
  -2  -6   2 5857.79  181.85
   2   6  -1  171.56   39.91
   2   6  -1  143.66   12.60
  -2   6   1  172.85   34.20
  -2   6   1  159.18   27.23
   2  -6  -1  101.11   13.97
  -2  -6   1  157.45   26.30
   2  -6  -1  151.50   26.86
  -2  -6   1   85.60   21.67
   2   6   0 3346.05  114.88
   2   6   0 3514.19   93.01
  -2   6   0 3477.62   87.10
  -2   6   0 3501.91   86.94
   2  -6   0 3569.10   89.06
  -2  -6   0 3916.20  119.43
  -2  -6   0 3371.82   91.42
   2  -6   0 3623.44   90.12
  -2   6  -1 5129.60  129.06
   2   6   1 5046.96  135.78
  -2   6  -1 4531.75  115.71
   2  -6   1 4286.84  105.79
  -2  -6  -1 4705.32  131.67
   2  -6   1 4348.00  109.41
  -2  -6  -1 5154.93  129.51
   2   6   2  917.70   60.34
   2   6   2  816.02   61.21
  -2   6  -2  599.00   45.84
  -2   6  -2  757.85   51.76
   2  -6   2  858.36   58.10
  -2  -6  -2  770.21   64.56
   2  -6   2  727.94   49.46
  -2  -6  -2  772.46   48.83
   2   6   3  501.19   27.03
   2   6   3  488.54   48.22
  -2   6  -3  308.19   30.82
  -2   6  -3  501.67   70.33
  -2  -6  -3  537.02   56.75
  -2  -6  -3  406.06   28.04
   2  -6   3  400.76   28.92
   2  -6   3  527.37   67.31
   2   6   4  363.62   28.26
   2   6   4  223.66   32.91
  -2   6  -4  411.56   44.54
  -2   6  -4  346.81   30.52
  -2  -6  -4  427.25   60.83
  -2  -6  -4  335.23   26.75
   2  -6   4  412.43   71.20
   2  -6   4  246.49   68.50
   2   6   5  340.19   24.35
   2   6   5  369.02   64.51
  -2   6  -5  520.11  126.40
  -2   6  -5  311.18   24.37
  -2  -6  -5  359.08   51.65
   2  -6   5  263.48   24.14
  -2  -6  -5  341.48   22.40
   2  -6   5  355.99   37.26
  -2   6  -6  110.75   45.36
  -2  -6  -6  120.71   57.66
   2  -6   6   42.46   13.60
   2  -6   6   49.75   25.28
  -2  -6  -6   20.60   11.22
   2   6   7   96.43   24.24
  -2   6  -7   22.70   34.33
  -2  -6  -7  145.70   68.38
   2  -6   7   98.58   22.26
  -2  -6  -7   69.49   15.04
   2   6   8   27.27   12.87
  -2   6  -8   48.77   38.09
  -2  -6  -8   99.32   56.80
   2  -6   8   20.01    8.61
  -2  -6  -8   21.64   13.32
   2   6   9  141.44   59.39
  -2   6  -9   89.98   44.81
  -2  -6  -9  154.12   47.65
   2  -6   9  166.04   43.79
  -2   6 -10   68.60   65.76
   2   6  10   72.74   22.99
  -2  -6 -10   46.04   50.64
   2  -6  10   50.61   14.97
  -2   6 -11   43.83   58.11
  -2  -6 -11  105.43   73.28
   2  -6  11    9.59   17.76
   2  -8 -12    9.74   39.06
   2   8 -11  111.08   55.16
   2  -8 -11  149.80   51.00
   2   8 -10  144.80   43.22
   2  -8 -10   49.56   45.60
  -2  -8  10  110.88   29.90
  -2   8   9  202.49   59.39
   2   8  -9  266.29   58.75
  -2   8   9  293.99   43.49
   2  -8  -9  496.65   96.23
  -2  -8   9  362.32   59.79
   2   8  -8   69.29   28.26
  -2   8   8  196.67   42.26
   2  -8  -8  244.80   61.23
  -2  -8   8  122.54   32.18
  -2  -8   8  152.49   41.86
  -2   8   7   10.31    7.04
   2   8  -7   12.20   13.59
  -2   8   7    7.83   22.39
  -2  -8   7   15.82   12.02
   2  -8  -7  115.59   53.73
  -2  -8   7   19.15   21.15
  -2   8   6  181.74   45.47
   2   8  -6  224.57   43.72
  -2   8   6  165.21   32.43
  -2   8   6  245.87   26.41
  -2  -8   6  253.58   61.66
  -2  -8   6   71.28   40.77
   2  -8  -6  106.34   32.51
  -2  -8   6  253.48   32.99
   2   8  -5 1018.17   56.81
  -2   8   5  864.32   69.08
  -2   8   5  890.87   39.00
  -2   8   5  819.77   47.57
   2  -8  -5  872.85   76.60
  -2  -8   5  911.87   45.77
  -2  -8   5  877.30   78.45
  -2  -8   5  946.33  126.84
  -2   8   4 2705.27  136.21
   2   8  -4 2690.95  119.74
  -2   8   4 2628.45  109.84
  -2   8   4 2994.65  131.30
   2  -8  -4 2874.29  144.80
  -2  -8   4 3167.27  135.88
  -2  -8   4 2924.36  166.51
  -2  -8   4 2706.13  127.89
  -2   8   3 1022.19   63.24
  -2   8   3  836.59   32.88
   2   8  -3  887.76   39.94
  -2  -8   3  989.51   40.79
  -2  -8   3  920.87  156.88
   2  -8  -3  865.26   59.19
   2   8  -2  787.32   48.25
  -2   8   2  757.31   64.42
  -2   8   2  829.89   54.01
  -2   8   2  818.82   49.34
   2  -8  -2  832.47   55.51
  -2  -8   2  845.87   76.39
   2   8  -1  111.54   13.54
   2   8  -1   34.03   40.19
  -2   8   1  120.32   24.54
   2   8  -1  105.42    9.03
  -2   8   1  123.19   12.20
  -2  -8   1  205.87   37.31
   2  -8  -1  116.83   21.44
   2  -8  -1   89.97   14.12
   2   8   0   28.20   40.73
   2   8   0   -4.33   17.97
  -2   8   0   19.47    9.62
  -2   8   0    6.59   10.58
  -2  -8   0   28.63   16.89
  -2  -8   0   11.60   22.43
   2  -8   0   32.44   15.05
   2  -8   0    9.58   10.70
  -2   8  -1 3218.00   85.93
   2   8   1 2926.05   88.99
   2   8   1 3365.80  104.88
  -2  -8  -1 2757.91   91.57
  -2  -8  -1 2761.04   92.63
   2  -8   1 3014.68   80.42
   2  -8   1 3087.19   79.07
   2   8   2  465.16   35.27
   2   8   2  648.25   53.73
  -2   8  -2  611.56   43.74
  -2   8  -2  684.62   96.55
   2  -8   2  551.38   49.55
  -2  -8  -2  530.61   34.80
  -2  -8  -2  642.79   70.89
   2  -8   2  604.06   44.43
   2   8   330203.83 1939.55
   2   8   323892.42  695.44
  -2   8  -326228.83  750.37
  -2   8  -323274.28  661.06
  -2  -8  -323962.31  698.71
  -2  -8  -324526.51  688.88
   2  -8   321957.66  625.01
   2  -8   324924.58  705.54
   2   8   4  239.53   35.61
   2   8   4  218.75   47.91
  -2   8  -4  269.41   57.75
  -2   8  -4  292.26   29.25
  -2  -8  -4  210.41   35.81
  -2  -8  -4  233.96   19.59
   2  -8   4  257.72   27.32
   2  -8   4  247.52   56.00
   2   8   5 4266.57  237.27
  -2   8  -5 4642.96  271.45
   2   8   5 4279.58  254.98
  -2   8  -5 4384.56  249.58
  -2  -8  -5 4444.12  273.53
  -2  -8  -5 4254.33  236.77
   2  -8   5 4476.86  254.21
   2  -8   5 3787.68  215.68
  -2   8  -6  372.81   65.31
   2   8   6  254.85   51.88
  -2  -8  -6  232.87   49.36
   2  -8   6  151.71   21.34
  -2  -8  -6  194.77   34.57
   2  -8   6  294.09   55.83
   2   8   7   22.91   11.40
  -2   8  -7   38.48   34.21
  -2  -8  -7   52.48   45.53
   2  -8   7   42.87   19.75
   2   8   8   65.47   14.97
  -2   8  -8  113.10   38.94
  -2  -8  -8   55.74   50.95
   2  -8   8   70.93   20.52
   2   8   9  530.65   55.70
  -2   8  -9  595.53   67.93
  -2  -8  -9  858.43  101.46
   2  -8   9  584.70   76.14
   2   8  10   29.47   13.71
  -2   8 -10   21.73   42.07
  -2  -8 -10   23.20   49.08
   2  -8  10   22.01   17.33
  -2   8 -11   17.18   50.20
  -2  -8 -11   51.27   40.46
   2  -8  11   39.01   11.83
   2 -10 -12   55.40   37.38
  -2 -10  12   90.71   37.37
   2  10 -11  165.42   45.13
   2 -10 -11  201.67  143.21
  -2 -10  11  318.78   38.56
   2  10 -10  300.97   56.11
  -2 -10  10  324.24   43.55
  -2  10   9  678.92   24.33
   2  10  -9  761.03   57.18
   2 -10  -9  580.55  218.52
  -2 -10   9  867.34  157.67
  -2  10   8 2840.66  208.43
   2  10  -8 2660.38  207.85
  -2  10   8 2969.16  231.32
  -2 -10   8 2803.73  213.83
   2 -10  -8 2540.13  214.85
  -2 -10   8 2732.14  210.00
  -2  10   7  132.95   27.41
   2  10  -7  126.34   28.65
  -2  10   7  130.75   23.38
  -2 -10   7  138.90   44.73
   2 -10  -7  136.51   47.06
  -2 -10   7  156.47   28.15
  -2  10   6  864.91   78.80
   2  10  -6  878.12   88.85
  -2  10   6  742.15   71.95
  -2 -10   6  585.93   60.98
   2 -10  -6  923.22  158.13
  -2 -10   6  800.18   80.13
  -2  10   5 1670.92   72.88
  -2  10   5 1223.98  250.96
   2  10  -5 1585.55   75.26
  -2  10   5 1417.80   56.27
   2 -10  -5 1405.79  205.97
  -2 -10   5 1251.09   54.76
  -2 -10   5 1485.74  135.99
   2  10  -4 3402.68  147.31
  -2  10   4 3339.79  164.14
   2 -10  -4 3267.67  166.18
  -2 -10   4 3701.67  155.59
  -2 -10   4 3246.37  175.27
  -2 -10   4 3528.15  158.57
  -2  10   3   59.23   28.91
   2  10  -3   13.41    8.03
  -2  10   3   43.46   17.26
  -2 -10   3   22.85    3.98
  -2 -10   3   66.00   25.40
   2  10  -2 3420.53   86.68
  -2  10   2 3502.34  123.45
   2  10  -2 3942.58   96.09
  -2  10   2 3483.20  111.25
  -2  10   2 3455.64   83.02
   2 -10  -2 3380.23   81.12
  -2 -10   2 3757.29  153.55
   2  10  -1 7571.10  186.16
  -2  10   1 7694.61  187.70
   2  10  -1 7608.69  180.14
  -2  10   1 7772.55  185.17
   2  10  -1 7524.18  223.21
  -2 -10   1 6709.81  201.35
   2 -10  -1 7894.78  187.36
   2 -10  -1 7803.42  190.14
   2  10   0   21.11   40.45
   2  10   0    8.63   15.98
  -2  10   0   58.08   18.04
  -2  10   0   12.24   11.22
  -2 -10   0    2.49   15.48
  -2 -10   0   67.85   27.17
   2 -10   0   23.22    7.18
   2 -10   0   35.93   14.63
   2  10   1 2619.82   90.65
   2  10   1 2786.50   90.86
  -2  10  -1 2331.53   63.99
  -2  10  -1 2741.91   76.23
   2 -10   1 2670.03   70.54
  -2 -10  -1 2835.41   93.47
   2 -10   1 2661.43   74.43
   2  10   2 1090.87   84.53
   2  10   2  980.00   60.28
  -2  10  -2  886.70   58.38
  -2  10  -2  897.18   75.18
   2 -10   2  965.29   43.17
   2 -10   2  897.10   44.77
  -2 -10  -2  944.95   66.23
   2  10   3  630.06   43.18
   2  10   3  777.80   57.32
  -2  10  -3  910.53   52.80
  -2  10  -3  835.76   46.44
  -2 -10  -3  861.04   62.87
  -2 -10  -3  833.95   36.90
   2 -10   3  953.92   54.75
   2 -10   3 1001.72   48.69
   2  10   4 5968.40  236.78
   2  10   4 4629.92  203.97
  -2  10  -4 5471.57  229.00
  -2  10  -4 4797.17  196.36
  -2 -10  -4 5089.38  227.80
  -2 -10  -4 4763.51  190.77
   2 -10   4 5358.34  218.82
   2 -10   4 4981.14  201.05
  -2  10  -5 5737.32  328.13
   2  10   5 5708.23  317.95
  -2 -10  -5 7018.47  411.06
   2 -10   5 5748.96  325.85
  -2 -10  -5 6299.69  347.79
   2 -10   5 6512.48  365.79
   2  10   6  240.68   38.07
  -2  10  -6  270.19   42.92
  -2 -10  -6  259.13   54.07
  -2 -10  -6  276.16   30.80
   2 -10   6  357.56   58.43
   2  10   7  974.09   88.48
  -2  10  -7  999.11  169.02
  -2 -10  -7  952.81  115.35
   2 -10   7 1153.57  142.95
   2  10   8   51.39   11.27
  -2  10  -8   68.31   33.33
  -2 -10  -8   97.01   60.77
   2 -10   8   42.36   20.19
  -2 -10  -8   43.66   11.88
   2  10   9   18.92    7.90
  -2  10  -9   67.24   42.09
  -2 -10  -9  109.51   50.01
   2 -10   9   33.29   10.27
  -2  10 -10  296.36   77.31
  -2 -10 -10  279.13   65.70
   2 -10  10  277.01  101.51
  -2  10 -11    5.36   44.78
  -2 -10 -11   63.77   57.04
   2 -10  11   46.87   16.24
   2 -12 -11   34.91   43.07
  -2 -12  11    8.22   21.96
   2  12 -10  117.48   44.07
   2 -12 -10   90.16   40.50
  -2 -12  10   62.47   33.14
   2  12  -9   33.48   14.01
   2 -12  -9   46.96   33.94
  -2 -12   9  105.36   32.50
   2  12  -8  999.45  102.52
   2 -12  -8  728.80  290.69
  -2 -12   8  876.41   93.90
  -2 -12   8 1299.82  193.59
  -2  12   7 1179.53  103.54
   2  12  -7 1062.69  103.13
  -2  12   7 1027.21   94.37
  -2 -12   7  959.27   95.21
   2 -12  -7  879.46  283.33
  -2 -12   7 1132.87  110.43
  -2  12   6 3307.28  193.43
   2  12  -6 3207.16  198.48
  -2  12   6 2997.65  175.72
  -2 -12   6 3109.82  188.01
   2 -12  -6 3064.89  227.19
  -2 -12   6 3382.88  211.12
   2  12  -5   42.75   14.67
  -2  12   5   -0.94   29.71
   2 -12  -5  -15.18   37.78
  -2 -12   5    3.78    5.59
  -2 -12   5   13.35   42.16
  -2 -12   5    3.63   23.30
   2  12  -4 3819.57  154.55
   2 -12  -4 3927.29  181.66
  -2 -12   4 3452.18  135.26
  -2 -12   4 3507.98  149.05
  -2  12   3 6619.26  294.55
   2  12  -3 7192.18  298.83
  -2  12   3 6081.12  257.32
  -2 -12   3 7149.55  294.06
  -2 -12   3 6713.66  378.92
  -2  12   2 1056.83   62.94
   2  12  -2 1060.02   49.55
   2  12  -2 1031.82   40.97
  -2  12   2 1042.94   49.88
  -2  12   2 1020.18   41.14
   2 -12  -2 1104.67   72.42
  -2 -12   2 1136.30  137.61
   2  12  -1 2948.08  104.58
   2  12  -1 2893.69   85.22
  -2  12   1 2801.32   88.04
  -2  12   1 2827.57   85.90
   2  12  -1 2600.86  120.50
  -2 -12   1 2760.74  153.24
   2 -12  -1 2919.29   87.14
   2 -12  -1 2927.03   91.11
   2  12   0   56.03   37.57
   2  12   0   40.48   24.31
  -2  12   0   19.37   12.23
  -2  12   0   30.77   11.90
  -2 -12   0   15.50   16.64
  -2 -12   0   81.92   39.94
   2 -12   0   32.56    7.98
   2 -12   0   46.46   11.45
   2  12   1  505.80   45.98
   2  12   1  501.89  113.85
  -2  12  -1  423.38   24.22
  -2  12  -1  546.77   33.14
  -2 -12  -1  598.73   48.75
  -2 -12  -1  615.77   62.93
   2 -12   1  434.82   28.36
   2 -12   1  484.79   25.50
   2  12   2 3747.94  128.52
   2  12   2 4175.66  165.46
  -2  12  -2 4442.59  137.59
  -2  12  -2 3907.47  124.09
  -2 -12  -2 3985.98  143.80
  -2 -12  -2 4780.48  144.09
   2 -12   2 4201.65  131.93
   2 -12   2 4111.18  124.00
   2  12   3 8994.22  383.53
   2  12   3 7151.75  314.83
  -2  12  -3 6473.41  278.16
  -2  12  -3 7664.39  325.09
  -2 -12  -3 7176.56  329.01
  -2 -12  -3 7760.73  321.56
   2 -12   3 7136.58  303.81
   2 -12   3 7065.26  295.57
  -2  12  -4 1036.16   63.55
   2  12   4  848.54   58.16
  -2  12  -4  720.02   48.09
   2  12   4  879.11   45.42
  -2 -12  -4  903.44   77.67
   2 -12   4 1060.95   61.79
  -2 -12  -4  984.07   43.02
  -2  12  -5  172.19   24.99
   2  12   5  213.43   43.11
  -2 -12  -5  153.33   42.17
   2 -12   5  231.96   51.57
   2 -12   5  203.43   33.19
  -2 -12  -5  175.05   14.74
  -2  12  -6   -3.33   30.75
   2  12   6   65.15   20.72
  -2 -12  -6   66.15   41.65
   2 -12   6    5.17   13.36
  -2 -12  -6    5.55    4.91
   2 -12   6   48.77   22.76
   2  12   7   12.89    4.79
  -2  12  -7    7.23   29.63
  -2 -12  -7  120.25   65.45
   2 -12   7   -1.87   14.97
  -2 -12  -7   24.65    9.70
   2  12   8   16.58    4.68
  -2  12  -8    3.74   33.60
  -2 -12  -8  -10.26   49.98
   2 -12   8   13.16   19.03
  -2 -12  -8   15.26    7.17
   2  12   9  115.42   39.67
  -2  12  -9  228.77   54.12
  -2 -12  -9  283.76   74.39
   2 -12   9  191.44   33.78
  -2 -12 -10  140.51   55.41
   2 -12  10   84.36   32.18
  -2  12 -11   48.92   38.91
  -2 -12 -11   94.91   61.60
   2 -12  11   74.33   35.46
   2 -14 -11   28.62   49.86
  -2 -14  11    2.42   25.56
   2  14 -10   43.02   26.48
   2 -14 -10   34.65   55.15
  -2 -14  10  126.28   48.37
   2  14  -9  444.20   66.88
   2 -14  -9  495.21  276.85
  -2 -14   9  772.81   99.68
   2  14  -8   25.85   25.39
   2 -14  -8   56.82   44.41
  -2 -14   8  -29.29   23.34
   2  14  -7   96.98   25.10
   2 -14  -7  -17.49   41.91
  -2 -14   7   50.65    9.33
  -2 -14   7   78.87   28.43
   2  14  -6  232.49   35.32
   2 -14  -6  273.57   73.20
  -2 -14   6  231.69   43.13
  -2 -14   6  242.05   41.11
   2  14  -5  642.23   96.90
   2 -14  -5  766.00  211.24
  -2 -14   5  659.86   60.84
  -2 -14   5  669.95  120.28
  -2  14   4 1495.71  216.18
   2  14  -4 1689.45   74.60
  -2  14   4 1677.63   78.35
  -2 -14   4 1563.96   62.83
  -2 -14   4 1227.58  300.69
  -2 -14   4 1446.02   73.83
  -2  14   3 1893.74  109.75
   2  14  -3 2136.59   97.41
  -2  14   3 1920.47   89.72
  -2 -14   3 1887.35   79.79
  -2 -14   3 1777.34  371.99
  -2  14   2  679.36  159.33
   2  14  -2  637.81   48.53
   2  14  -2  753.14   50.34
  -2  14   2  666.05   49.87
  -2 -14   2  610.35   68.77
   2 -14  -2  696.96   46.82
   2  14  -1 1057.62   53.59
   2  14  -1 1073.68   72.43
  -2  14   1 1093.14   75.80
  -2  14   1 1039.88   45.47
   2 -14  -1 1039.81   47.64
   2 -14  -1 1029.03   45.23
  -2 -14   1 1149.91  253.29
   2  14   0 2274.89  115.12
   2  14   0 2643.57   95.16
  -2  14   0 2576.44   88.66
  -2  14   0 2605.54   82.70
  -2 -14   0 2712.10   97.20
  -2 -14   0 2130.12   94.14
   2 -14   0 2713.79   86.28
   2 -14   0 2739.25   87.79
   2  14   1  480.64  131.82
   2  14   1  369.59   37.27
  -2  14  -1  366.67   23.39
  -2  14  -1  352.50   49.11
  -2 -14  -1  456.79   40.76
  -2 -14  -1  406.46   37.77
   2 -14   1  301.34   24.25
   2 -14   1  411.42   25.46
   2  14   2 1131.66   71.24
   2  14   2  986.08   66.11
  -2  14  -2 1160.32   58.15
  -2  14  -2 1119.57   56.94
  -2 -14  -2 1052.02   68.65
  -2 -14  -2 1181.42   59.79
   2 -14   2 1086.73   61.46
   2 -14   2 1213.37   57.14
   2  14   3   28.61   11.49
   2  14   3   71.85   29.72
  -2  14  -3   86.71   23.14
  -2  14  -3  107.83   21.60
  -2 -14  -3   67.06   26.34
  -2 -14  -3   64.34   14.48
   2 -14   3   71.33   12.80
   2 -14   3   75.31   23.06
   2  14   4  885.39  171.07
   2  14   4  744.43   53.04
  -2  14  -4 1057.66   78.01
  -2  14  -4  657.51  123.42
  -2 -14  -4 1126.91  101.29
  -2 -14  -4  820.40   19.83
   2 -14   4  936.43   66.63
   2 -14   4  813.01   23.85
  -2  14  -5  239.91   45.74
   2  14   5  215.55   42.29
  -2 -14  -5  183.36   46.21
   2 -14   5  283.97   76.02
  -2 -14  -5  282.05   48.11
   2 -14   5  328.51   43.78
  -2  14  -6 1188.64   92.11
   2  14   6 1296.97   82.64
  -2 -14  -6 1313.66  117.72
   2 -14   6 1320.68   87.22
  -2 -14  -6 1187.71   74.10
   2 -14   6 1565.82  105.84
   2  14   7  256.63   63.37
  -2  14  -7  337.44   65.72
  -2 -14  -7  220.82   63.80
   2 -14   7  240.55   42.09
  -2 -14  -7  247.24   32.13
  -2  14  -8   51.24   34.40
  -2 -14  -8   69.04   29.52
   2 -14   8   32.42   12.35
   2  14   9    0.91   14.23
  -2  14  -9   76.33   41.23
  -2 -14  -9   55.58   63.69
   2 -14   9   24.98   22.04
  -2  14 -10   26.25   39.29
  -2 -14 -10   48.31   46.94
   2 -14  10   67.11   31.11
  -2  14 -11    7.53   40.52
  -2 -14 -11   17.35   51.09
   2 -14  11   55.96   36.75
   2 -16 -11   21.59   29.86
  -2 -16  11   29.72   25.99
   2 -16 -10  135.51   34.24
  -2 -16  10  202.41   46.61
   2  16  -9   56.95   31.00
   2 -16  -9   48.69   54.55
  -2 -16   9   52.47   36.57
   2 -16  -8   69.17   56.71
  -2 -16   8   98.06   39.02
  -2 -16   8  263.13   68.81
   2 -16  -7   73.28   48.28
  -2 -16   7   13.16    5.22
  -2 -16   7   16.85   29.47
   2  16  -6  204.90   31.13
   2 -16  -6  308.97  100.84
  -2 -16   6  212.94   30.09
  -2 -16   6  225.76   40.69
   2  16  -5  713.39   71.43
   2 -16  -5  666.55   81.74
  -2 -16   5  777.50   72.62
  -2 -16   5  601.78   65.69
   2  16  -4   13.48    7.52
  -2  16   4   26.46   18.31
  -2 -16   4   17.41    5.63
  -2 -16   4   83.72   21.12
  -2  16   3 1209.16   83.69
   2  16  -3  952.80   44.12
  -2  16   3  992.26   52.15
  -2 -16   3  900.87  174.65
  -2 -16   3 1053.54   58.07
   2  16  -2  156.26   20.52
  -2  16   2  167.23   44.19
   2  16  -2  115.93   12.29
  -2  16   2  169.50   21.65
  -2 -16   2   68.04   52.74
   2 -16  -2  103.24   14.31
  -2  16   1  127.23   29.37
   2  16  -1  202.60   23.72
   2  16  -1  149.32   13.86
  -2  16   1  147.35   22.42
  -2 -16   1  138.32   33.85
   2 -16  -1  170.88   18.38
   2  16   0 3891.63  177.13
  -2  16   0 4054.27  178.23
  -2  16   0 3872.75  166.17
   2  16   0 3839.24  167.39
  -2 -16   0 3592.55  172.73
   2 -16   0 3659.49  158.34
   2 -16   0 4246.96  181.59
   2  16   1  157.15   39.65
   2  16   1  108.64   25.74
  -2  16  -1  159.50   43.20
  -2  16  -1  172.94   29.18
  -2 -16  -1  137.57   35.90
  -2 -16  -1  163.22   38.38
   2 -16   1  124.60   18.63
   2 -16   1  119.90   13.60
   2  16   2  -11.94   25.23
   2  16   2   19.15   18.20
  -2  16  -2   55.69   13.66
  -2  16  -2   23.43    9.12
  -2 -16  -2    1.14   28.91
  -2 -16  -2   14.45    6.72
   2 -16   2    7.35   11.11
   2 -16   2    4.87   10.93
   2  16   3 2562.29  177.81
   2  16   3 2228.47  144.65
  -2  16  -3 2320.17  136.05
  -2  16  -3 2381.69  141.70
  -2 -16  -3 2489.00  164.54
  -2 -16  -3 2086.52  119.41
   2 -16   3 2329.30  142.59
   2 -16   3 2312.88  131.90
  -2  16  -4  355.07   44.69
   2  16   4  227.20   40.10
  -2 -16  -4  214.79   53.58
   2 -16   4  163.39   28.61
  -2 -16  -4  253.51   31.59
   2 -16   4  269.15   37.53
   2  16   5  896.21  137.96
  -2  16  -5  923.49   70.70
  -2 -16  -5 1034.26  102.26
  -2 -16  -5  838.89   18.86
   2 -16   5 1012.03   76.17
  -2  16  -6  568.84   88.69
   2  16   6  461.99   87.10
  -2 -16  -6  439.11   87.32
   2 -16   6  303.69   73.42
  -2 -16  -6  451.41   63.68
   2 -16   6  586.13   93.24
   2  16   7   55.26   17.52
  -2 -16  -7  103.97   61.25
   2 -16   7  144.03   28.90
  -2 -16  -7  107.36   11.63
   2  16   8    5.36    9.31
  -2  16  -8   18.13   29.16
  -2 -16  -8   56.57   66.10
   2 -16   8   16.69   15.01
  -2  16  -9  123.52   32.43
  -2 -16  -9  104.14   63.32
   2 -16   9  117.71   38.62
  -2  16 -10   71.43   41.80
  -2 -16 -10   70.11   59.24
   2 -16  10  115.19   33.31
  -2  16 -11   -4.09   46.57
  -2 -16 -11   38.90   58.88
   2 -16  11   34.32   15.60
  -2 -18  11  151.24   47.40
   2 -18 -10   63.45   36.11
  -2 -18  10   43.46   29.88
   2 -18  -9  378.09  175.43
  -2 -18   9  607.22   70.18
   2 -18  -8  382.39   77.92
  -2 -18   8  409.35   35.23
   2  18  -7  264.62   54.53
   2 -18  -7  392.66   68.10
  -2 -18   7  218.43   47.66
  -2 -18   7  402.57   86.30
   2  18  -6  793.18   76.27
   2 -18  -6  983.24  110.42
  -2 -18   6  864.25   77.87
  -2 -18   6 1038.98  103.55
   2  18  -5 1623.23  102.07
  -2  18   5 1373.74  167.02
  -2 -18   5 1584.39  107.34
   2  18  -4  673.88   66.70
  -2  18   4  722.06  109.62
  -2 -18   4  740.40   68.62
  -2 -18   4 1018.98  105.09
   2  18  -3  386.04   46.26
   2  18  -3  437.31   15.62
  -2  18   3  548.41   30.18
  -2 -18   3  315.44   75.31
   2 -18  -3  447.59   13.45
  -2 -18   3  541.50   31.94
  -2  18   2 2086.35  135.57
   2  18  -2 2057.11  123.22
   2  18  -2 2035.38  114.21
  -2  18   2 1969.15  123.06
  -2 -18   2 2053.35  150.24
   2 -18  -2 2114.42  128.85
   2 -18  -2 1909.76  107.47
   2  18  -1 1883.87  103.15
  -2  18   1 1755.03  113.36
  -2  18   1 1778.47   78.56
   2  18  -1 1891.30   80.93
  -2 -18   1 2251.45  126.31
   2 -18  -1 2042.89   87.57
   2  18   0  771.57   54.55
  -2  18   0  670.01   37.70
   2  18   0  652.07   34.48
   2 -18   0  690.92   37.18
  -2 -18   0  487.45   40.19
   2 -18   0  591.67   28.59
   2  18   1 4176.98  202.63
   2  18   1 3533.58  158.54
  -2  18  -1 3990.00  161.62
  -2  18  -1 4118.55  169.22
  -2 -18  -1 3715.45  165.40
  -2 -18  -1 3825.88  171.85
   2 -18   1 4229.85  174.62
   2 -18   1 3871.72  156.29
   2  18   2   52.41   21.33
   2  18   2   79.43   27.47
  -2  18  -2   74.42   21.57
   2 -18   2   55.61    9.96
  -2 -18  -2   23.59   45.40
  -2 -18  -2   17.64    9.66
   2 -18   2   73.85   17.48
   2  18   3  232.82   64.78
   2  18   3   68.18   31.49
  -2  18  -3  272.39   82.04
  -2  18  -3  171.74   21.87
  -2 -18  -3  197.43   52.31
  -2 -18  -3  177.93   27.55
   2 -18   3  225.36   53.30
   2 -18   3  178.50   43.14
  -2  18  -4  255.35   56.88
   2  18   4  270.86   33.59
  -2 -18  -4  305.41   53.44
   2 -18   4  201.67   65.11
  -2 -18  -4  325.59   44.50
   2 -18   4  297.74   40.40
  -2  18  -5  900.35  189.25
   2  18   5  766.35   57.05
  -2 -18  -5 1057.30  239.75
   2 -18   5  832.98   55.25
  -2 -18  -5  770.08   47.25
   2 -18   5 1008.92   75.79
   2  18   6   79.82   23.49
  -2  18  -6   21.06   24.18
  -2 -18  -6   27.00   46.64
  -2 -18  -6   72.96   15.58
   2 -18   6   85.71   32.18
   2  18   7    6.65   10.68
  -2  18  -7   50.41   18.38
  -2 -18  -7   38.31   50.54
   2 -18   7   40.88   37.13
  -2  18  -8   25.05   46.15
  -2 -18  -8   19.04   28.65
   2 -18   8   19.44   25.08
  -2  18  -9   52.86   21.20
   2 -18   9   24.51   25.58
  -2  18 -10   12.90   37.66
  -2 -18 -10   31.80   62.44
   2 -18  10   27.14   22.90
   2 -20 -10  133.23   74.47
  -2 -20  10   93.04   41.73
   2 -20  -9   24.76   46.24
  -2 -20   9   52.47   37.06
  -2 -20   8  -23.99   24.72
   2  20  -7    4.61   11.91
   2 -20  -7   47.44   45.86
  -2 -20   7  -20.70   28.10
   2  20  -6  428.76   55.64
  -2  20   6  369.31   64.43
  -2 -20   6  349.36   48.49
  -2 -20   6  443.16   64.16
   2  20  -5  236.60   36.79
  -2  20   5  199.74   33.98
  -2 -20   5  190.73   27.57
  -2 -20   5  245.80   68.68
   2  20  -4   15.37    7.72
  -2  20   4   43.60   26.38
  -2 -20   4   37.32   29.29
   2  20  -3  402.33   86.47
   2  20  -3  476.29   47.45
  -2  20   3  543.51   59.25
   2 -20  -3  402.11   46.73
   2 -20  -3  483.51   45.04
  -2 -20   3  605.87   69.67
   2  20  -2  156.55   37.69
   2  20  -2  181.43   10.71
  -2  20   2  190.55   22.17
  -2 -20   2  165.75   44.71
   2 -20  -2  204.22   35.19
  -2 -20   2  206.43   32.77
  -2  20   1  148.77   41.15
   2  20  -1  225.95   31.60
  -2  20   1  191.73   27.12
  -2 -20   1  177.56   38.31
   2 -20  -1  219.73   26.29
   2  20   0 4137.26  241.46
  -2  20   0 4110.12  231.21
   2  20   0 3995.93  223.48
   2 -20   0 3676.83  207.41
  -2 -20   0 3046.11  189.14
   2 -20   0 4189.63  235.82
   2  20   1  170.87   29.79
  -2  20  -1  260.31   53.01
   2  20   1  213.72   26.19
   2 -20   1  229.04   26.68
  -2 -20  -1  186.69   34.04
   2 -20   1  282.28   44.60
  -2  20  -2  232.07   50.47
   2  20   2  190.70   30.79
  -2 -20  -2  146.74   27.39
   2 -20   2  198.47   29.80
  -2 -20  -2  155.76   40.43
   2 -20   2  243.04   51.19
   2  20   3 1651.16  119.80
  -2  20  -3 1710.64  110.93
  -2 -20  -3 1671.03  123.13
  -2 -20  -3 2158.50  137.16
   2 -20   3 1672.89  110.34
   2  20   4   13.43   19.20
  -2  20  -4   14.20   13.83
  -2 -20  -4   78.77   37.69
  -2 -20  -4   15.65    7.00
   2 -20   4   55.21   23.71
  -2  20  -5  304.92  109.89
   2  20   5  316.86   58.18
  -2 -20  -5  301.95   65.99
   2 -20   5  179.13   58.79
  -2 -20  -5  256.96   40.39
   2 -20   5  374.09   61.48
   2  20   6  927.52  119.92
  -2  20  -6  984.69  102.32
  -2 -20  -6 1070.13  136.59
   2 -20   6  829.25   87.93
  -2 -20  -6  824.16   75.62
   2  20   7  370.40   84.02
  -2  20  -7  426.39  136.84
  -2 -20  -7  449.05   70.44
   2 -20   7  714.07   50.60
  -2  20  -8  137.17   46.09
  -2 -20  -8   69.37   50.11
   2 -20   8   82.54   30.07
  -2  20  -9    4.97   20.61
  -2 -20  -9   43.53   57.07
   2 -20   9   10.02   27.14
  -2  20 -10   62.10   39.04
  -2 -20 -10   33.16   56.33
   2 -20  10    5.65   22.86
  -2  22  10   38.52   25.11
  -2 -22  10   -8.42   26.18
  -2  22   9   12.55   26.10
  -2 -22   9   25.29   31.52
  -2  22   8  475.35   54.86
  -2 -22   8  319.42   64.53
   2  22  -7   73.01   13.75
  -2  22   7   29.82   23.22
  -2 -22   7   73.40   29.02
   2  22  -6   19.95   13.31
  -2  22   6  -10.94   23.33
  -2 -22   6    3.19    5.32
  -2 -22   6   49.57   30.94
   2  22  -5  479.42   61.14
  -2  22   5  563.98   87.71
  -2 -22   5  519.24   69.65
   2  22  -4   77.35   22.33
   2  22  -4  197.47   44.11
  -2  22   4  124.85   26.14
  -2 -22   4  129.98   34.16
   2  22  -3  577.80   65.50
   2  22  -3  608.25   63.38
  -2  22   3  549.09  124.31
   2 -22  -3  458.28   56.25
   2 -22  -3  500.21   51.02
  -2 -22   3  500.52  104.08
   2  22  -2  636.30   67.67
  -2  22   2  814.87   81.97
   2 -22  -2  748.55  124.11
   2 -22  -2  798.85   76.63
  -2 -22   2  833.64  109.09
   2  22  -1   -3.50   16.81
   2  22  -1   15.67    8.69
  -2  22   1   27.16    7.35
  -2 -22   1   42.22   30.45
   2 -22  -1   15.51   19.84
   2 -22  -1   20.52   10.08
  -2  22   0  937.71   61.80
   2  22   0 1060.96   60.59
  -2  22   0 1089.80   49.43
   2  22   0 1210.08   49.15
  -2 -22   0  693.82   78.78
   2 -22   0 1218.89   53.96
   2  22   1  491.51   65.14
  -2  22  -1  498.82   86.58
   2  22   1  497.34   96.99
   2 -22   1  404.11   44.07
  -2  22  -2  208.24   39.34
   2  22   2  176.88   40.17
  -2 -22  -2  305.96   45.54
   2 -22   2  235.72   55.55
  -2 -22  -2  193.44   39.18
   2 -22   2  269.40   39.87
  -2  22  -3  562.52   63.55
  -2 -22  -3  319.17   95.84
   2 -22   3  450.26   48.67
  -2 -22  -3  617.49   65.42
   2 -22   3  496.92   86.68
  -2  22  -4  200.08   55.65
  -2 -22  -4  181.18   64.10
   2 -22   4  117.28   21.71
  -2 -22  -4  225.20   39.53
   2 -22   4  221.22   42.58
  -2  22  -5  591.63  123.28
  -2 -22  -5  441.62  147.09
  -2 -22  -5  542.13   50.48
   2 -22   5  795.79   88.08
  -2  22  -6  213.71   78.22
  -2 -22  -6  170.08   59.88
   2 -22   6  257.77   52.39
  -2  22  -7   50.32   15.85
  -2 -22  -7   46.31   43.80
   2 -22   7   49.16   26.39
  -2  22  -8   94.84   31.74
  -2 -22  -8   86.59   53.19
   2 -22   8   45.15   19.75
  -2 -22  -9  110.84   58.64
   2 -22   9   80.49   38.01
  -2 -22 -10   46.30   48.68
  -2  24  10  133.64   44.22
  -2 -24  10  235.25   65.58
  -2  24   9  216.62   92.69
  -2 -24   9  488.36   55.16
  -2  24   8  209.18   39.71
  -2 -24   8  215.53   73.11
  -2  24   7  214.70   36.35
  -2 -24   7  274.64   44.25
   2  24  -6  405.87   62.72
  -2  24   6  372.67   34.44
  -2 -24   6  479.67   40.03
   2  24  -5   41.66   12.50
   2  24  -5   56.79   18.34
  -2  24   5   74.10   22.65
  -2 -24   5  167.30   40.49
   2  24  -4  667.86  115.74
   2  24  -4  574.73   67.52
  -2  24   4  745.63   65.61
  -2 -24   4  895.43  159.04
   2  24  -3 1225.49  116.68
   2  24  -3 1346.45  128.15
  -2  24   3 1342.53  129.37
   2 -24  -3 1265.92  115.94
   2 -24  -3 1131.23  100.15
  -2 -24   3 1265.95  120.84
   2  24  -2  684.10   37.85
   2  24  -2  675.38   20.88
  -2  24   2  767.59   55.88
   2 -24  -2  757.10  124.72
   2 -24  -2  752.88   47.87
  -2 -24   2  727.00   56.59
   2  24  -1 3397.66  212.73
   2  24  -1 3666.53  220.89
  -2  24   1 3865.42  230.95
  -2 -24   1 3624.03  252.04
   2 -24  -1 3339.70  217.39
   2 -24  -1 3892.29  230.43
  -2 -24   1 3546.60  225.15
  -2  24   0  182.40   48.38
   2  24   0  157.14   26.69
  -2 -24   0  107.07   30.51
   2 -24   0  250.40   36.82
  -2 -24   0  275.99   38.30
   2  24   1   71.83   29.71
  -2  24  -1  134.92   31.36
   2  24   1  106.58   14.02
  -2 -24  -1   79.15   23.81
   2 -24   1  135.04   24.90
  -2  24  -2   86.09   15.44
   2  24   2  134.78   33.30
   2 -24   2   59.57   10.76
  -2 -24  -2   93.11   21.23
   2 -24   2  129.47   28.78
  -2  24  -3 1502.09  140.81
  -2 -24  -3 1718.01  172.50
  -2 -24  -3 1732.40  155.45
   2 -24   3 1605.10  149.15
  -2  24  -4   21.43   13.15
  -2 -24  -4   73.64   42.22
  -2 -24  -4   35.50    8.53
   2 -24   4   63.89   23.43
  -2  24  -5  231.80   59.38
  -2 -24  -5  173.21   46.31
   2 -24   5  249.66   51.76
  -2  24  -6   52.35   22.43
  -2 -24  -6   93.26   25.36
   2 -24   6   28.32   24.05
  -2  24  -7   66.32   34.53
  -2 -24  -7   55.10   31.46
  -2 -24  -8   50.75   41.02
   2 -24   8   90.03   39.27
  -2 -24  -9   85.07   73.39
   2 -24   9   71.61   25.84
  -2  26   9  129.07   42.44
  -2 -26   9   53.82   33.23
  -2  26   8  101.37   47.53
  -2  26   7   10.59   26.93
  -2 -26   7   53.13   27.57
   2  26  -6   24.88   14.31
  -2 -26   6   23.56   25.79
   2  26  -5  238.73   52.51
  -2  26   5  228.27   35.60
  -2 -26   5  277.50   46.69
   2  26  -4  433.49   31.71
   2  26  -4  382.06   35.14
  -2  26   4  514.64   99.00
  -2 -26   4  551.28   64.42
   2  26  -3   58.83   18.80
   2  26  -3   71.40   20.52
  -2  26   3   64.71   18.43
   2 -26  -3   45.57   13.73
  -2 -26   3   97.41   27.60
   2  26  -2  549.22  134.75
   2  26  -2  844.94   65.75
  -2  26   2  962.21   80.98
   2 -26  -2  888.18   68.73
  -2 -26   2  855.93  148.70
   2  26  -1 1029.71  105.18
  -2  26   1 1185.89  109.53
   2  26  -1 1223.78  110.83
   2 -26  -1  807.91  264.28
   2 -26  -1 1190.64  108.91
  -2 -26   1 1037.99  101.07
   2  26   0  115.01   25.02
  -2  26   0  113.33   21.35
   2  26   0  113.47   22.34
   2 -26   0  132.73   35.23
  -2 -26   0   38.79   27.96
   2 -26   0  107.54   23.71
  -2 -26   0  141.54   40.70
  -2  26  -1 1340.45  122.98
   2  26   1 1256.00  115.21
  -2 -26  -1 1307.99  132.44
   2 -26   1 1470.28  134.99
  -2 -26  -1 1363.54  124.95
  -2  26  -2  741.08   61.65
   2  26   2  904.02   74.94
   2 -26   2  940.12   79.97
  -2 -26  -2  876.22   71.16
  -2  26  -3  528.07   60.74
   2  26   3  612.12   67.97
   2 -26   3  512.42  109.33
  -2 -26  -3  567.01   56.36
  -2  26  -4  358.92   90.96
  -2 -26  -4  415.27   74.55
   2 -26   4  429.75   60.75
  -2 -26  -4  380.59   37.63
  -2  26  -5  220.00   63.90
  -2 -26  -5   73.32   18.59
   2 -26   5  200.49   41.08
  -2  26  -6   66.90   32.40
  -2 -26  -6   61.52   64.96
   2 -26   6  139.81   41.28
  -2  26  -7   95.63   34.33
  -2 -26  -7   91.25   42.51
   2 -26   7  104.02   31.50
  -2  26  -8   18.33   32.60
  -2 -26  -8  115.71   59.13
   2 -26   8   34.72   27.58
  -2 -26  -9   36.94   33.49
   2 -26   9   13.18   24.85
  -2  28   8   49.65   26.32
  -2 -28   8   46.85   32.55
  -2  28   7  152.33   38.73
  -2 -28   7   99.60   33.75
  -2  28   6    8.47   23.24
  -2 -28   6   54.30   30.27
   2  28  -5   37.01   13.04
  -2  28   5    4.27   19.98
  -2 -28   5   23.94   25.52
  -2  28   4   78.82   14.06
  -2 -28   4   95.85   30.33
   2  28  -3   68.94   30.89
  -2  28   3    7.28   18.85
   2 -28  -3    4.30   10.35
   2 -28  -3    3.77    2.03
  -2 -28   3    2.75   24.44
   2  28  -2  424.42   67.53
  -2  28   2  432.99   60.58
   2 -28  -2  317.98   50.85
   2 -28  -2  436.29   19.47
  -2 -28   2  368.17   43.76
   2  28  -1  172.32   36.47
   2  28  -1  171.50   49.30
  -2  28   1  177.60   49.05
   2 -28  -1  126.47   27.63
   2 -28  -1  183.20   21.69
  -2 -28   1  217.62   53.40
  -2  28   0  202.47   57.98
   2  28   0  314.74   35.50
   2 -28   0  249.17   50.47
   2 -28   0  342.68   38.88
  -2 -28   0  215.06   43.65
  -2  28  -1    6.93   12.46
   2  28   1   34.88   14.61
  -2 -28  -1  -17.27   24.95
   2 -28   1    3.28   16.21
  -2  28  -2    2.39   12.91
   2  28   2   33.20   22.55
   2 -28   2   11.21   17.65
  -2 -28  -2    8.22   10.73
  -2  28  -3   20.34   19.34
   2  28   3   37.49   23.53
   2 -28   3   36.43   20.51
  -2 -28  -3   -0.71    7.35
  -2  28  -4   32.68   18.01
   2  28   4   23.85   18.79
   2 -28   4   35.59   21.36
  -2 -28  -4    6.70    4.30
  -2  28  -5   48.36   24.06
  -2 -28  -5   75.56   41.80
   2 -28   5   41.00   26.01
  -2 -28  -6  104.99   78.96
   2 -28   6  255.35   37.56
  -2 -28  -7   74.35   46.41
   2 -28   7  139.98   39.13
  -2 -28  -8   -3.19   42.70
   2 -28   8   54.32   22.02
  -2  30   8    5.86   26.53
  -2  30   7   12.15   23.84
  -2 -30   7   52.32   32.98
  -2  30   6   85.73   21.70
  -2 -30   6   85.71   42.26
  -2  30   5  166.62   33.44
   2  30  -4  380.41   48.24
  -2  30   4  351.36  105.43
  -2 -30   4  389.11  141.38
  -2  30   3   18.04   22.69
   2 -30  -3   -1.22    3.03
  -2 -30   3    1.45   23.86
   2  30  -2  491.67   22.87
  -2  30   2  414.00   92.75
   2 -30  -2  396.66   19.34
  -2 -30   2  529.62   43.10
   2  30  -1   28.43   11.71
  -2  30   1   12.18   10.24
   2 -30  -1  -14.70   31.79
   2 -30  -1   26.42   14.79
  -2  30   0  398.17  109.51
   2  30   0  369.41   81.64
   2 -30   0  380.86   99.44
  -2 -30   0  422.99  102.30
  -2  30  -1  382.54   48.80
   2  30   1  371.58   56.54
   2 -30   1  323.61   54.73
  -2 -30  -1  289.64   82.14
  -2  30  -2   18.88   13.18
   2  30   2   30.71   15.68
   2 -30   2   15.98   16.64
  -2  30  -3   20.20   11.78
   2 -30   3   44.52   33.41
  -2 -30  -3   30.08   10.38
  -2  30  -4   15.84   16.14
   2  30   4   37.85   19.22
  -2  30  -5   37.16   18.94
   2  30   5   44.91   21.53
   2 -30   5    5.64   21.50
  -2 -30  -6  174.44   65.28
   2 -30   6  103.73   27.53
  -2 -30  -7   99.71   46.17
   2 -30   7   19.78   30.10
  -2 -32   7   38.36   27.33
  -2  32   6  238.70   35.05
  -2  32   5   51.47   16.88
  -2 -32   5   79.13   29.22
  -2  32   4   95.82   26.53
   2  32  -3  100.29   26.93
  -2  32   3   71.88   28.17
  -2 -32   3   67.48   27.75
  -2  32   2  169.75   45.32
   2 -32  -2  134.41   50.19
  -2 -32   2  270.17   36.78
   2  32  -1  582.72   71.18
  -2  32   1  415.60   55.38
  -2 -32   1  505.96   66.22
  -2  32   0  824.56   99.93
   2  32   0  755.07   89.91
   2 -32   0  841.59  110.68
  -2 -32   0  818.86  101.07
  -2  32  -1  192.62   46.01
   2  32   1  180.91   56.64
   2 -32   1  182.65   40.49
  -2 -32  -1  241.81   25.52
  -2  32  -2  211.82   56.43
   2  32   2  270.84   27.69
   2 -32   2  282.01   31.81
  -2 -32  -2  253.44   44.96
  -2  32  -3   27.74   16.65
   2  32   3   25.82   19.22
   2 -32   3   -4.46   21.72
  -2  32  -4   11.04   10.65
   2  32   4   80.71   22.27
   2 -32   4   29.24   31.56
   2  32   5   60.14   21.67
   2 -32   5   51.89   29.44
   2  32   6  204.95   54.65
   2 -32   6  160.11   96.87
   2  32   7   19.90   24.31
   2 -32   7    4.71   27.69
  -2  34   6   18.93   28.25
  -2 -34   6   32.20   17.75
  -2  34   5  391.10   35.23
  -2 -34   5  382.21  101.77
  -2  34   4   77.41   23.22
  -2 -34   4  111.76   31.50
  -2  34   3   26.27   13.68
  -2 -34   3   42.52   24.05
   2  34  -2   15.87    9.45
  -2  34   2   75.59   29.40
  -2 -34   2   36.02   13.03
  -2  34   1   22.24   17.29
   2  34  -1   20.15    9.44
   2 -34  -1    7.93   11.58
   2  34   0   13.87   12.27
  -2  34   0   -1.43   16.65
   2 -34   0    2.35   13.85
  -2 -34   0   19.71    9.34
  -2  34  -1  278.51   69.09
   2  34   1  269.30   79.93
  -2 -34  -1  281.05   33.05
   2 -34   1  298.01   93.39
   2  34   2    3.10   13.82
   2 -34   2   13.66   15.75
  -2  34  -3   12.02   17.46
   2  34   3   11.73   19.50
   2 -34   3    1.04   22.84
  -2  34  -4   41.34   14.78
   2  34   4   54.30   25.74
   2 -34   4   15.06   22.07
  -2  34  -5    7.80   15.63
   2 -34   5   25.18   22.73
   2  34   6   21.59   12.90
  -2  36   5    6.12   19.26
  -2  36   4    8.23   18.97
  -2 -36   4   20.69   14.54
  -2  36   3   78.24   29.61
  -2 -36   3   38.70   28.13
  -2  36   2  412.24  127.63
  -2 -36   2  678.52   47.08
  -2  36   1    4.59   12.03
   2  36  -1   42.86   13.90
  -2 -36   1   28.17   19.66
  -2  36   0   91.31   33.11
   2 -36   0   36.31   17.69
  -2 -36   0  113.32   28.75
  -2  36  -1   25.34   17.23
   2  36   1   -0.79   13.83
   2 -36   1   39.48   24.01
  -2 -36  -1    1.69   16.03
  -2  36  -2  121.80   35.54
   2  36   2  123.85   25.04
   2 -36   2   74.17   20.94
  -2  36  -3   10.15   20.35
   2  36   3   37.76   12.29
   2 -36   3   -3.66   20.94
  -2  36  -4   27.74   11.55
   2 -36   4    8.52   12.24
   2  36   5  130.98   39.96
  -2  38   4   -8.48   22.90
  -2  38   3   36.36   15.34
  -2 -38   3   82.93   45.93
  -2  38   2  276.72   65.48
  -2  38   1   62.91   18.88
  -2 -38   1   70.54   32.59
  -2  38   0    6.48   10.40
   2  38   0    7.20    7.28
  -2 -38   0   -1.41   18.43
  -2  38  -1   25.31   10.64
   2  38   1   43.58   16.46
  -2  38  -2   86.32   19.99
   2  38   2   62.75   21.44
   2 -38   2  125.58   50.87
  -2  38  -3  125.67   36.11
  -2  40   1   57.66   26.01
  -2 -40   1   84.32   33.50
  -2  40   0  169.49   41.62
  -2  40  -1   -5.12   12.49
   2  40   1   40.49   20.76
   3   1 -12   54.16   40.95
   3  -1 -12   51.61   23.12
   3   1 -11  116.09   51.77
   3   1 -10  122.79   52.56
  -3   1  10   62.74   22.33
   3  -1 -10   82.94   52.57
  -3  -1  10   32.11   16.87
   3   1  -9  431.94   69.16
  -3   1   9  169.42   48.79
   3  -1  -9  311.90   74.27
  -3  -1   9  220.59   36.82
   3   1  -8 2390.15  225.60
  -3   1   8 2472.54  221.51
  -3  -1   8 2312.59  206.93
   3  -1  -8 2131.39  203.14
   3   1  -7  772.02   86.78
  -3   1   7  620.86   63.99
  -3   1   7  620.01   69.83
  -3   1   7  557.62   74.44
  -3  -1   7  614.66   71.27
   3  -1  -7  634.23   78.53
  -3  -1   7  662.48   70.38
   3   1  -6 1866.00  120.38
  -3   1   6 1716.01  111.21
  -3   1   6 1531.04  112.66
  -3   1   6 1765.47  139.39
   3  -1  -6 1735.68  116.62
  -3  -1   6 1772.40  111.70
  -3  -1   6 1841.91  131.95
  -3  -1   6 1578.95  112.00
  -3   1   5 1378.06   85.14
   3   1  -5 1065.62   65.26
  -3   1   5 1301.19   72.35
  -3  -1   5 1121.35   62.53
   3  -1  -5 1028.38   68.26
  -3  -1   5 1088.18   83.67
   3   1  -4   36.61   22.27
  -3   1   4   12.07   11.00
  -3   1   4   26.18   16.96
   3  -1  -4   27.29   25.70
  -3  -1   4    6.77    7.30
  -3  -1   4   60.61   34.42
  -3   1   3 8971.28  233.05
  -3   1   3 8583.64  205.43
  -3   1   3 8604.45  225.57
   3   1  -3 8523.86  268.62
  -3  -1   3 9117.65  227.13
   3  -1  -3 8236.07  225.61
  -3  -1   3 8564.46  203.68
  -3  -1   3 8023.13  216.31
   3   1  -229099.95  675.41
  -3   1   229567.73  687.02
  -3  -1   230081.96  697.54
   3  -1  -228764.24  669.10
   3  -1  -227706.71  662.37
  -3  -1   231452.96  751.01
  -3   1   117320.43  404.59
   3   1  -117734.26  412.77
   3  -1  -116025.05  374.34
  -3  -1   115789.75  368.05
   3   1   0 1175.84   81.41
  -3   1   0 1029.90   66.64
   3   1   0 1124.95   84.71
  -3   1   0 1003.59   63.15
  -3  -1   0 1391.49   88.15
   3  -1   0 1457.23   93.13
   3  -1   0 1140.58   71.42
   3   1   1 2478.82   66.50
   3   1   1 2816.33   81.13
  -3   1  -1 2826.87   87.62
  -3   1  -1 2591.51   70.16
  -3  -1  -1 2743.23   85.71
   3  -1   1 2795.99   74.87
  -3  -1  -1 2767.16   74.18
   3  -1   1 2476.80   68.26
   3   1   2   40.00   12.98
  -3   1  -2   15.18   26.37
  -3   1  -2   42.29   12.70
   3   1   2   68.59   25.03
  -3  -1  -2   29.87   31.31
   3  -1   2   32.72   12.94
   3  -1   2   14.98   22.40
  -3  -1  -2   27.01    7.48
  -3   1  -3 8348.45  272.55
  -3   1  -3 7460.75  218.09
   3   1   3 6896.02  211.78
   3   1   3 7019.98  206.00
   3  -1   3 7933.45  240.71
  -3  -1  -3 7678.46  244.54
  -3  -1  -3 7594.37  222.01
   3  -1   3 7460.29  218.41
  -3   1  -4 2377.47  125.04
   3   1   4 2399.20  106.51
   3   1   4 2274.77  113.38
  -3   1  -4 2308.04  104.73
   3  -1   4 2246.49  108.47
  -3  -1  -4 2160.35  113.95
   3  -1   4 2395.89  107.50
  -3  -1  -4 2143.01   98.77
   3   1   5 7149.51  283.74
  -3   1  -5 6934.89  297.46
   3   1   5 6276.07  261.90
  -3   1  -5 6937.68  279.82
  -3  -1  -5 7144.94  306.67
   3  -1   5 6823.20  272.03
  -3  -1  -5 6760.52  269.20
   3  -1   5 7185.31  296.24
  -3   1  -6  492.04  126.41
   3   1   6  562.81   79.45
  -3   1  -6  561.29   65.37
  -3  -1  -6  602.63   74.96
   3  -1   6  610.89   75.80
   3   1   7  292.91   43.79
  -3   1  -7  240.33   60.24
  -3  -1  -7  334.62   57.18
   3  -1   7  273.29   36.14
  -3   1  -8  680.15  142.84
   3   1   8  468.00   93.56
   3  -1   8  595.95  119.08
  -3  -1  -8  447.05   71.94
  -3   1  -9  409.49   70.04
   3   1   9  155.40   53.77
   3  -1   9  168.79   53.55
  -3  -1  -9   91.57   51.13
  -3   1 -10   92.32   46.45
  -3  -1 -10  234.19   59.72
   3  -1  10  125.84   39.63
  -3   1 -11   67.68   53.71
   3   1  11    4.46   15.51
  -3  -1 -11  -20.63   46.12
   3   3 -12   29.41   33.74
   3  -3 -12   51.93   46.24
  -3  -3  12  -10.12   16.25
  -3   3  11  123.24   50.95
   3   3 -11  158.88   39.08
   3  -3 -11  122.08   54.11
   3   3 -10   33.60   33.82
  -3   3  10   -3.52   16.80
  -3  -3  10   34.88   18.89
   3  -3 -10  112.36   40.11
   3   3  -9   49.84   28.81
  -3   3   9  102.48   25.77
  -3  -3   9  106.83   22.79
   3  -3  -9   87.54   53.00
  -3   3   8  405.46  133.48
   3   3  -8  751.55  194.65
  -3   3   8  595.05  130.63
   3  -3  -8  594.76  101.23
  -3  -3   8  638.98   92.94
   3   3  -7  335.30   80.88
  -3   3   7  362.51   80.28
  -3   3   7  339.68   40.57
  -3   3   7  293.99   56.90
   3  -3  -7  484.21   73.24
  -3  -3   7  311.25   76.30
  -3  -3   7  367.98   48.32
  -3  -3   7  495.27   90.93
   3   3  -6  189.70   32.24
  -3   3   6  180.90   37.54
  -3   3   6  151.63   27.49
  -3   3   6  193.47   16.55
  -3  -3   6  193.03   22.37
   3  -3  -6  215.39  132.00
  -3  -3   6   39.88   33.14
  -3  -3   6  177.20   35.41
  -3   3   5 6031.61  273.40
   3   3  -5 5180.99  228.95
  -3   3   5 4651.05  210.91
  -3  -3   5 4781.83  208.50
   3  -3  -5 5343.48  242.71
  -3  -3   5 5302.10  255.27
   3   3  -4   55.72   20.52
  -3   3   4   86.70   22.59
  -3   3   4   83.91   20.84
  -3  -3   4   56.49   24.55
  -3  -3   4   17.06   36.05
   3  -3  -4   40.60   31.20
  -3   3   3 2102.10   73.48
  -3   3   3 2458.57   82.09
  -3   3   3 1943.67   78.87
   3   3  -3 2142.44  106.23
  -3  -3   3 2083.59   61.46
  -3  -3   3 1882.64  141.78
   3  -3  -3 2433.38   96.90
  -3  -3   3 1945.17   75.94
  -3   3   2  107.41   16.18
  -3   3   2  120.14   14.81
   3   3  -2  110.13   50.09
  -3  -3   2  145.89   12.62
   3  -3  -2  129.82   31.99
  -3  -3   2   85.34   24.34
   3  -3  -2   95.68   12.12
   3   3  -1   32.34   36.34
  -3   3   1    5.02    9.52
   3   3  -1    7.92    4.91
  -3   3   1    8.39    5.62
  -3  -3   1   17.54    9.03
  -3  -3   1   56.88   21.93
   3  -3  -1   19.02   16.60
   3  -3  -1    3.60    4.24
  -3   3   0 5431.67  136.39
  -3   3   0 4841.84  119.71
  -3  -3   0 4777.21  123.57
   3  -3   0 4607.31  113.53
   3  -3   0 4519.28  112.56
  -3  -3   0 5113.63  133.17
   3   3   1  373.75   85.88
   3   3   1  227.10   46.46
  -3   3  -1  238.82   65.02
  -3   3  -1  290.31   23.64
   3  -3   1  316.94   30.13
  -3  -3  -1  394.92   82.15
  -3  -3  -1  264.48   21.29
   3  -3   1  317.21   27.63
  -3   3  -215570.67  381.60
   3   3   212255.79  302.06
  -3   3  -213866.65  330.47
   3   3   213565.00  324.41
  -3  -3  -214572.42  381.19
  -3  -3  -214802.44  350.79
   3  -3   213791.34  328.66
   3  -3   212512.97  301.76
   3   3   3 8442.78  247.73
   3   3   3 7341.25  225.97
  -3   3  -3 7275.88  254.20
  -3   3  -3 8284.79  242.67
  -3  -3  -3 8363.09  267.29
  -3  -3  -3 8091.76  234.70
   3  -3   3 8235.63  240.96
   3  -3   3 9119.94  273.45
  -3   3  -4 3327.48  165.59
  -3   3  -4 3072.49  137.02
   3   3   4 2767.01  130.66
   3   3   4 3208.74  139.24
  -3  -3  -4 2655.93  143.16
   3  -3   4 3036.76  134.33
  -3  -3  -4 2849.33  125.30
   3  -3   4 3414.74  157.28
  -3   3  -5 1357.05   88.51
   3   3   5  635.16   95.42
   3   3   5  837.07   46.27
  -3  -3  -5  845.04  104.99
   3  -3   5 1184.64   68.37
   3  -3   5  961.09  101.81
  -3  -3  -5  808.17   42.21
  -3   3  -6  198.55   33.10
  -3   3  -6  232.04   44.33
   3   3   6  193.80   43.21
   3  -3   6  211.16   40.70
  -3  -3  -6  199.80   49.26
  -3  -3  -6  177.49   19.48
   3   3   7   33.30   16.19
  -3   3  -7   25.64   34.72
  -3  -3  -7  105.85   46.36
   3  -3   7   72.26   17.93
   3   3   8   33.94   11.61
  -3   3  -8   78.90   30.29
  -3  -3  -8    6.46   41.01
   3  -3   8   23.80   19.49
  -3   3  -9  118.32   72.63
   3   3   9  174.25   36.16
  -3  -3  -9  300.55   76.53
   3  -3   9  171.12   48.47
  -3   3 -10   35.65   46.88
  -3  -3 -10   36.59   40.55
   3  -3  10   13.39   19.95
  -3   3 -11   97.40   70.66
   3   3  11  131.44   35.82
  -3  -3 -11  -39.73   48.19
   3  -3  11   52.27   21.80
   3   5 -12   46.70   33.72
   3  -5 -12   57.15   40.80
   3   5 -11   74.73   39.06
  -3   5  11   31.44   14.79
   3  -5 -11   46.50   31.49
  -3  -5  11   17.14   20.74
   3   5 -10   68.01   28.75
  -3   5  10   66.79   30.54
   3  -5 -10   87.60   71.44
  -3  -5  10  108.16   28.47
   3   5  -9   11.55   30.06
  -3   5   9  122.13   50.76
   3  -5  -9   -7.56   36.97
  -3  -5   9   31.92   21.75
   3   5  -8  113.17   38.06
  -3   5   8    8.69    8.88
  -3   5   8   20.82   29.36
  -3  -5   8   12.24   17.32
  -3  -5   8    9.88   21.28
   3  -5  -8    6.61   32.51
   3   5  -7  441.63   55.71
  -3   5   7  568.74  130.71
  -3   5   7  585.00   74.46
   3  -5  -7  686.50  165.30
  -3  -5   7  621.81   69.37
  -3  -5   7  560.61   78.89
   3   5  -6  627.19   36.06
  -3   5   6  657.72   43.94
  -3   5   6  660.11   47.77
  -3   5   6  610.35   21.22
  -3  -5   6  736.34   35.80
   3  -5  -6  666.61  203.67
  -3  -5   6  468.82   99.36
  -3  -5   6  617.08   59.85
  -3   5   5  296.86   33.01
   3   5  -5  361.57   30.20
  -3   5   5  372.40   25.29
  -3   5   5  232.34   42.26
   3  -5  -5  319.08  123.26
  -3  -5   5  365.91   27.36
  -3  -5   5  454.13  104.07
  -3   5   4  287.53   49.78
   3   5  -4  299.31   56.88
  -3   5   4  221.08   33.45
   3  -5  -4  191.53   28.65
  -3  -5   4  258.15   53.70
  -3  -5   4  225.35   59.43
  -3   5   3  323.51   37.77
  -3   5   3  321.49   24.78
  -3   5   3  412.67   30.11
   3   5  -3  273.23   45.84
  -3  -5   3  454.95   32.63
   3  -5  -3  516.18   50.15
  -3  -5   3  419.96   52.88
  -3  -5   3  399.84   25.88
   3   5  -2 3037.76  118.88
  -3   5   2 2539.44   67.61
  -3  -5   2 2851.85   68.53
   3  -5  -2 2623.94   69.74
  -3  -5   2 2619.19   66.49
  -3  -5   2 2411.60   95.83
  -3   5   1 1936.71   78.55
   3   5  -1 1935.16   75.02
  -3   5   1 1933.62   76.58
   3   5  -1 1687.01  118.91
  -3  -5   1 1666.03  100.85
   3  -5  -1 1839.91  111.48
  -3  -5   1 2006.08   95.44
   3   5   0  847.16   77.89
   3   5   0  644.91   44.61
  -3   5   0  669.65   43.89
  -3   5   0  681.99   44.21
   3  -5   0  700.24   45.35
  -3  -5   0  686.89   51.23
   3  -5   0  744.04   49.31
  -3  -5   0  651.18   47.59
   3   5   1 9051.74  224.27
   3   5   1 8361.29  208.65
  -3   5  -1 9420.35  230.28
  -3   5  -1 9436.96  227.14
  -3  -5  -1 9029.36  234.85
   3  -5   1 8571.84  206.47
   3  -5   1 9537.06  229.91
   3   5   2  888.74   66.21
  -3   5  -2  845.81   55.71
  -3   5  -2 1018.07   73.15
   3   5   2 1101.79   74.16
  -3  -5  -2  985.79   80.76
  -3  -5  -2  855.88   55.13
   3  -5   2  792.44   53.60
   3  -5   2  831.95   55.20
   3   5   3 1157.72   42.39
   3   5   3 1163.61   59.66
  -3   5  -3 1137.49   90.75
  -3   5  -3 1209.57   48.35
  -3  -5  -3 1077.32   86.97
   3  -5   3 1221.01   50.57
  -3  -5  -3 1191.31   43.07
   3  -5   3  966.25   73.32
   3   5   4  203.64   20.16
   3   5   4  264.95   46.77
  -3   5  -4  164.58   33.96
  -3   5  -4  189.70   20.37
  -3  -5  -4  201.77   41.42
  -3  -5  -4  212.24   54.36
   3  -5   4  274.00   51.74
   3  -5   4  230.53   47.03
   3   5   5  701.90   27.43
  -3   5  -5  648.09   49.94
   3   5   5  669.80   46.17
  -3   5  -5  608.22   77.49
  -3  -5  -5  627.63   95.41
   3  -5   5  692.95   63.96
  -3  -5  -5  703.91   25.96
   3  -5   5  700.68  118.94
   3   5   6 1379.86   88.69
  -3   5  -6 1423.47  258.53
  -3  -5  -6 1345.09  110.03
   3  -5   6 1379.15   92.32
  -3  -5  -6 1434.47  129.19
   3   5   7  881.64  123.35
  -3   5  -7  945.02  151.94
  -3  -5  -7  968.62  112.30
   3  -5   7  794.30  145.67
  -3  -5  -7  764.75   89.87
   3   5   8  386.62   56.86
  -3   5  -8  361.01   57.46
  -3  -5  -8  278.81   58.52
   3  -5   8  439.08   50.99
   3   5   9  153.05   39.66
  -3   5  -9  233.36   63.62
  -3  -5  -9  137.13   49.35
   3  -5   9  166.17   29.51
   3   5  10   19.58   16.47
  -3   5 -10    9.16   42.16
  -3  -5 -10   10.76   48.11
   3  -5  10   27.76   13.79
  -3  -5 -11   23.45   33.35
   3  -5  11   34.06   18.51
   3  -7 -12  -17.75   44.30
   3  -7 -11  196.39  103.61
  -3  -7  11  280.58   40.58
   3   7 -10  208.44   53.40
  -3  -7  10  161.38   40.30
  -3   7   9   19.09   22.47
   3   7  -9   39.67   23.41
  -3   7   9   10.96    9.90
   3  -7  -9  -69.85   36.57
  -3  -7   9   34.74   20.31
   3   7  -8  383.38   64.23
  -3   7   8  369.06   46.32
  -3   7   8  257.98   48.89
  -3  -7   8  364.36   51.50
  -3  -7   8  317.71   79.48
   3  -7  -8  253.74   95.72
  -3   7   7  590.67   62.43
   3   7  -7  502.15   63.46
  -3   7   7  673.76   44.77
  -3  -7   7  601.89   66.70
   3  -7  -7  566.42  224.61
  -3  -7   7  607.32   70.83
  -3   7   6  899.32  131.57
   3   7  -6 1039.91   54.65
  -3   7   6 1028.29   41.52
  -3   7   6  888.55  125.12
   3  -7  -6 1109.00   68.42
  -3  -7   6  984.16   65.57
  -3  -7   6  892.31  218.88
  -3  -7   6 1008.94   72.37
   3   7  -5 4369.59  179.73
  -3   7   5 4500.75  201.15
  -3   7   5 4149.63  184.51
  -3   7   5 4570.43  180.54
  -3  -7   5 4100.29  167.61
   3  -7  -5 4287.96  193.28
  -3  -7   5 4193.65  205.81
  -3   7   4 3960.66  184.48
   3   7  -4 4094.14  174.75
  -3   7   4 3814.17  164.67
  -3  -7   4 3749.97  158.39
  -3  -7   4 4069.29  215.87
  -3   7   3  874.22   56.92
  -3   7   3  860.91   43.16
   3   7  -3  861.57   71.82
  -3  -7   3  992.03   40.15
   3  -7  -3  980.98   52.71
  -3  -7   3  912.27   69.02
  -3  -7   3  918.90   35.32
  -3   7   2   90.79   16.31
  -3   7   2   71.52    9.88
   3   7  -2  113.04   34.79
  -3  -7   2   95.31   33.66
   3  -7  -2   63.03   19.78
   3  -7  -2   62.71   12.25
   3   7  -111433.96  313.25
   3   7  -110744.90  255.73
  -3   7   110989.01  262.23
  -3   7   110451.22  247.20
  -3  -7   110423.99  248.65
  -3  -7   1 9853.77  260.74
   3  -7  -110670.46  253.03
   3  -7  -110108.70  243.64
   3   7   0 3474.94  117.78
  -3   7   0 3292.39   85.33
  -3   7   0 3285.34   84.75
   3   7   0 3437.49  113.12
  -3  -7   0 3199.53   89.82
   3  -7   0 3185.60   85.27
   3  -7   0 3504.34   89.60
   3   7   116608.01  404.53
  -3   7  -116353.20  388.43
  -3  -7  -114985.91  367.75
   3  -7   116027.53  380.34
   3  -7   115372.93  363.28
  -3   7  -2 4166.33  130.75
   3   7   2 4679.03  154.94
  -3   7  -2 4877.50  147.98
   3   7   2 4809.72  126.87
  -3  -7  -2 4951.13  151.80
   3  -7   2 4561.51  146.21
  -3  -7  -2 4746.71  140.14
  -3   7  -3 5510.92  178.14
   3   7   3 4874.16  163.96
  -3   7  -3 4988.95  166.29
   3  -7   3 4945.52  150.87
  -3  -7  -3 5130.13  180.88
   3  -7   3 5052.66  166.20
  -3  -7  -3 5192.64  154.74
   3   7   4 7190.65  302.81
   3   7   4 7942.01  347.66
  -3   7  -4 6977.82  306.38
  -3   7  -4 7389.38  313.01
  -3  -7  -4 7193.38  321.82
   3  -7   4 7778.97  329.10
  -3  -7  -4 7240.10  302.61
   3  -7   4 6317.44  275.49
   3   7   5 3358.89  190.11
  -3   7  -5 3785.38  230.36
   3   7   5 3320.66  202.95
  -3   7  -5 3111.51  180.61
  -3  -7  -5 3313.28  212.67
   3  -7   5 3399.83  196.04
  -3  -7  -5 3349.79  188.97
   3  -7   5 2585.76  153.04
   3   7   6 1273.56   81.57
  -3   7  -6 1394.58  111.14
  -3  -7  -6 1106.81  101.10
   3  -7   6 1275.76  136.34
  -3  -7  -6 1253.12   80.65
   3   7   7 3959.90   93.69
  -3   7  -7 3734.76  344.35
  -3  -7  -7 3837.45  357.96
   3  -7   7 4130.12   78.74
   3   7   8  160.35   24.05
  -3   7  -8  154.46   43.41
  -3  -7  -8  166.16   53.77
   3  -7   8  175.80   45.07
   3   7   9   70.17   20.19
  -3   7  -9   88.06   43.98
  -3  -7  -9  123.35   44.03
   3  -7   9   36.36   17.63
   3   7  10   56.54   21.37
  -3   7 -10   32.96   27.80
  -3  -7 -10   99.43   37.26
   3  -7  10   82.73   17.18
  -3   7 -11   98.48   48.63
  -3  -7 -11   61.15   59.55
   3  -7  11  106.23   34.67
   3  -9 -12   82.15   58.56
  -3  -9  12   85.97   37.05
   3  -9 -11   92.74   41.87
  -3  -9  11  266.20   40.56
   3   9 -10  159.66   49.80
  -3   9  10  104.28   27.90
   3  -9 -10  181.19   40.51
  -3  -9  10   31.27   19.18
   3   9  -9  173.12   35.12
  -3   9   9  109.63   23.38
   3  -9  -9   74.35   35.21
  -3  -9   9  118.49   35.18
  -3   9   8   39.19   26.32
   3   9  -8   53.34   18.79
  -3   9   8   78.07   33.24
   3  -9  -8   61.25   41.43
  -3  -9   8   76.64   29.78
  -3   9   7  332.77   49.32
   3   9  -7  344.08   73.60
  -3   9   7  328.80   44.51
  -3  -9   7  447.17   53.41
   3  -9  -7  274.77   95.86
  -3  -9   7  345.39   47.65
  -3   9   6 2648.48   90.25
   3   9  -6 2541.57   98.75
  -3   9   6 2747.80  104.51
  -3  -9   6 2877.19  114.46
   3  -9  -6 2508.88  193.86
  -3  -9   6 2661.99  119.97
   3   9  -5 5833.72  233.10
  -3   9   5 6055.16  235.60
  -3   9   5 6198.69  267.48
  -3  -9   5 6764.97  266.15
  -3  -9   5 5984.70  276.19
   3  -9  -5 5887.96  258.43
  -3   9   4  279.91   37.38
   3   9  -4  309.26   24.80
  -3   9   4  274.67   27.97
  -3   9   4  372.06   42.99
  -3  -9   4  257.05   22.22
  -3  -9   4  280.60   54.37
  -3   9   3 1468.31   70.09
  -3   9   3 1428.26   52.87
  -3   9   3 1516.60   45.71
   3  -9  -3 1266.96   58.00
  -3  -9   3 1421.31   87.17
  -3   9   2 1959.17   65.98
  -3   9   2 2028.45   60.86
   3   9  -2 2002.72  306.63
  -3  -9   2 2289.11  110.38
   3  -9  -2 2411.36   78.32
   3  -9  -2 1963.28   65.58
   3   9  -1  432.47   69.47
   3   9  -1  433.49   32.23
  -3   9   1  333.25   25.46
  -3   9   1  360.48   24.58
  -3  -9   1  419.58   38.40
  -3  -9   1  322.66   38.18
   3  -9  -1  384.25   27.64
   3  -9  -1  378.98   29.85
  -3   9   0 1125.40   76.16
   3   9   0 1411.28  112.04
  -3   9   0 1323.18   82.29
   3   9   0 1170.16   87.70
  -3  -9   0 1445.34  145.19
  -3  -9   0 1424.13   99.32
   3  -9   0 1241.89   80.90
   3  -9   0 1274.06   81.35
   3   9   123680.04  578.65
   3   9   121729.84  523.69
  -3   9  -125855.01  610.57
  -3   9  -122037.77  520.62
  -3  -9  -122457.68  542.83
  -3  -9  -121927.17  520.78
   3  -9   121812.80  514.47
   3  -9   122694.23  532.99
   3   9   2    1.48    6.80
   3   9   2   41.47   26.69
  -3   9  -2   40.09   17.00
  -3   9  -2   16.87   15.27
  -3  -9  -2   -4.97   27.94
  -3  -9  -2   11.93    9.86
   3  -9   2   21.29   17.38
   3  -9   2   16.76    9.78
  -3   9  -3   48.73   25.11
  -3   9  -3  116.53   44.81
   3   9   3   84.43   14.97
  -3  -9  -3   77.81   30.94
  -3  -9  -3   77.66   16.17
   3  -9   3   56.92   12.80
   3  -9   3   67.95   13.68
   3   9   4  196.94   39.32
   3   9   4  100.68   26.82
  -3   9  -4  196.91   63.74
  -3   9  -4  196.66   29.53
  -3  -9  -4  116.14   34.12
   3  -9   4  217.07   40.39
  -3  -9  -4  210.92   15.51
   3  -9   4  168.60   17.75
  -3   9  -5    8.25   24.85
   3   9   5    6.70    5.16
  -3  -9  -5   58.25   41.34
   3  -9   5   35.12   17.12
   3  -9   5   -7.46   18.62
  -3  -9  -5   24.40    9.47
   3   9   6   36.01   18.39
  -3   9  -6   36.02   35.70
  -3  -9  -6   15.41   36.76
   3  -9   6   49.95   19.34
   3   9   7 1454.16  145.61
  -3   9  -7 1648.35  163.34
  -3  -9  -7 1562.89  159.68
   3  -9   7 1440.89  134.47
  -3  -9  -7 1477.84  139.08
   3   9   8  241.83   56.39
  -3   9  -8  407.32   86.34
  -3  -9  -8  492.51  105.59
   3  -9   8  308.12   52.17
   3   9   9   15.86    9.75
  -3   9  -9   92.59   38.97
  -3  -9  -9   16.75   17.93
   3  -9   9   23.21   12.45
  -3   9 -10   73.97   49.99
  -3  -9 -10    4.10   50.89
   3  -9  10   21.93   20.88
  -3   9 -11   54.29   43.21
  -3  -9 -11   81.63   70.15
   3  -9  11    3.48   17.53
  -3 -11  11   12.63   17.06
   3  11 -10   42.45   26.69
   3 -11 -10  160.73   62.58
  -3 -11  10   44.67   23.39
  -3  11   9   13.04    6.04
   3 -11  -9  -20.00   39.06
  -3 -11   9   43.37   24.11
  -3  11   8  405.38   73.06
   3  11  -8  506.34  101.65
   3 -11  -8  431.46  209.71
  -3 -11   8  581.83   70.59
  -3  11   7  197.98   47.94
   3  11  -7  167.01   48.45
  -3  11   7  190.89   29.29
   3 -11  -7  230.13   79.90
  -3 -11   7  189.69   36.35
  -3  11   6  232.33   32.22
   3  11  -6  157.12   32.97
  -3  11   6  163.69   34.96
  -3 -11   6  167.18   37.61
   3 -11  -6  119.83   42.02
  -3 -11   6  208.02   41.55
  -3  11   5 1149.55   94.23
   3  11  -5 1357.53   80.77
  -3  11   5 1144.96   64.46
  -3  11   5 1300.96   72.92
  -3 -11   5 1384.93   80.02
  -3 -11   5  851.38  195.49
  -3  11   4  287.63   42.57
  -3  11   4  307.75   24.84
  -3  11   4  284.96   15.91
  -3 -11   4  313.49   12.79
  -3 -11   4  289.58   52.06
  -3  11   3  495.61  106.90
  -3  11   3  446.67   38.24
  -3  11   3  426.43   28.86
   3 -11  -3  451.70   34.75
  -3 -11   3  342.97   69.44
  -3  11   2 5659.63  185.86
   3  11  -2 6457.61  182.90
  -3  11   2 5358.72  160.82
   3  11  -2 5703.79  221.19
  -3  11   2 5910.24  169.46
  -3 -11   2 6281.75  227.24
   3 -11  -2 5329.59  153.01
   3  11  -1  263.20   57.15
   3  11  -1  169.51   15.52
  -3  11   1  265.44   30.40
  -3  11   1  244.85   17.13
  -3 -11   1  182.78   45.56
  -3 -11   1  216.89   38.28
   3 -11  -1  187.31   15.30
   3 -11  -1  162.81   14.27
   3  11   0 1756.39  140.46
   3  11   0 1452.75   58.20
  -3  11   0 1377.71   47.75
  -3  11   0 1409.94   50.67
  -3 -11   0 1417.27   58.31
  -3 -11   0 1330.10   73.22
   3 -11   0 1427.04   49.14
   3 -11   0 1357.99   47.31
   3  11   1 2522.96  153.59
   3  11   1 2602.17   98.03
  -3  11  -1 2528.40   80.77
  -3  11  -1 2934.38   94.21
  -3 -11  -1 3001.10  109.39
  -3 -11  -1 2567.83   87.22
   3 -11   1 2920.87   97.54
   3 -11   1 2926.76   91.13
   3  11   2 6784.15  220.00
   3  11   2 5759.66  187.36
  -3  11  -2 5909.25  179.79
  -3  11  -2 5855.80  177.33
   3 -11   2 5659.37  176.48
   3 -11   2 5999.54  180.45
  -3 -11  -2 5955.82  197.57
   3  11   3  375.43   43.91
   3  11   3  399.26   83.54
  -3  11  -3  412.80   68.60
  -3  11  -3  482.02   81.63
  -3 -11  -3  606.56   62.40
  -3 -11  -3  558.27   71.75
   3 -11   3  439.48   38.13
   3 -11   3  429.37   73.66
   3  11   4 1342.87   78.69
   3  11   4 1432.38   83.38
  -3  11  -4 1262.76   82.64
  -3  11  -4 1299.71   64.73
  -3 -11  -4 1485.12  170.74
   3 -11   4 1150.70   59.69
  -3 -11  -4 1187.36   63.49
   3 -11   4 1605.18   75.08
  -3  11  -5   76.74   27.43
   3  11   5   99.70   33.43
  -3 -11  -5  125.82   41.52
   3 -11   5   86.70   22.11
  -3 -11  -5   88.54   13.58
   3 -11   5   92.12   18.33
   3  11   6   74.45   18.01
  -3  11  -6   62.37   20.24
  -3 -11  -6  112.51   52.38
   3 -11   6   70.99   28.22
  -3 -11  -6   59.59   10.30
   3  11   7   38.45   13.36
  -3  11  -7  102.65   53.59
  -3 -11  -7   58.11   46.86
   3 -11   7   90.92   29.45
  -3 -11  -7   58.79   10.33
   3  11   8   67.66   22.18
  -3  11  -8  121.31   38.36
  -3 -11  -8   65.03   52.64
   3 -11   8   51.67   15.68
  -3 -11  -8   62.08   12.73
   3  11   9    2.34    6.99
  -3  11  -9   16.53   40.08
  -3 -11  -9  -51.06   53.62
   3 -11   9  -13.23   19.79
   3  11  10   77.44   30.17
  -3  11 -10  243.54   61.93
  -3 -11 -10  158.56   56.71
   3 -11  10  104.75   29.99
  -3  11 -11   59.71   53.48
  -3 -11 -11  -19.15   49.19
   3 -11  11  -14.12   25.48
   3 -13 -11   60.07   31.88
  -3 -13  11    9.30   18.53
   3 -13 -10   60.69   40.44
  -3 -13  10   66.71   21.18
   3  13  -9   55.01   21.34
   3 -13  -9  127.93   47.25
  -3 -13   9   30.05   25.30
  -3  13   8  567.92   52.04
   3  13  -8  610.26  121.75
  -3  13   8  497.68   46.62
  -3 -13   8  484.93   68.86
   3 -13  -8  362.21  120.59
  -3 -13   8  733.10   92.73
   3  13  -7  792.66   78.75
   3 -13  -7  671.76  114.99
  -3 -13   7  746.63   68.80
  -3 -13   7  793.54  143.18
   3  13  -6 1356.78   87.29
   3 -13  -6 1406.38  109.98
  -3 -13   6 1562.95   97.56
  -3 -13   6 1538.03  135.11
   3  13  -5   14.69    7.32
  -3  13   5   66.74   28.04
  -3 -13   5   23.51    4.55
  -3 -13   5   44.25   35.47
  -3  13   4  489.21   46.69
  -3  13   4  531.00   61.89
  -3 -13   4  429.48   16.94
  -3 -13   4  447.48   66.31
  -3  13   3 5653.31  240.91
  -3 -13   3 5250.86  258.74
   3 -13  -3 6415.90  268.10
  -3  13   2 1726.30   97.01
   3  13  -2 1494.63   66.31
   3  13  -2 1492.03   62.87
  -3  13   2 1479.35   70.38
   3  13  -2 1520.51  103.74
  -3  13   2 1547.08   67.74
  -3 -13   2 1798.87  121.91
   3 -13  -2 1607.33   70.96
   3  13  -110947.80  354.69
   3  13  -110972.09  318.40
  -3  13   1 9934.72  296.43
  -3  13   110777.20  308.12
  -3 -13   111134.16  323.67
  -3 -13   1 9153.59  329.80
   3 -13  -110818.14  308.36
   3 -13  -110908.51  314.66
   3  13   0  348.56   48.06
   3  13   0  361.92   31.09
  -3  13   0  387.51   64.21
  -3  13   0  354.32   51.31
  -3 -13   0  384.31   31.46
  -3 -13   0  338.60   61.29
   3 -13   0  375.26   50.81
   3 -13   0  264.75   18.23
   3  13   1 3491.62  167.84
   3  13   1 3705.29  169.40
  -3  13  -1 3387.73  146.43
  -3  13  -1 3695.26  159.41
  -3 -13  -1 3554.42  165.39
  -3 -13  -1 2879.39  129.10
   3 -13   1 3567.52  154.18
   3 -13   1 3957.41  168.91
   3  13   2  590.61   59.12
   3  13   2  629.03   56.72
  -3  13  -2  734.71   58.20
  -3  13  -2  722.53   55.23
  -3 -13  -2  754.71   65.37
  -3 -13  -2  773.60   62.15
   3 -13   2  817.25  105.51
   3 -13   2  719.39   51.13
   3  13   3 4968.18  214.96
   3  13   3 3827.88  170.86
  -3  13  -3 3507.75  159.17
  -3  13  -3 4107.61  170.71
  -3 -13  -3 3829.23  176.01
  -3 -13  -3 4056.90  161.46
   3 -13   3 4157.99  173.26
   3 -13   3 4255.85  171.46
  -3  13  -4   79.78   28.25
   3  13   4   12.76   28.50
  -3 -13  -4  118.51   59.20
   3 -13   4    2.72    5.16
   3 -13   4   -2.02   19.46
  -3 -13  -4    9.54    4.10
   3  13   5 3287.65  204.82
  -3  13  -5 3112.77  200.27
  -3 -13  -5 3292.71  224.39
  -3 -13  -5 3101.91  185.57
   3 -13   5 3530.75  217.94
   3  13   6  725.68   62.94
  -3  13  -6  713.42   70.17
  -3 -13  -6 1004.25   98.05
   3 -13   6  819.15   78.11
  -3 -13  -6  625.79   22.52
   3  13   7  279.52   77.81
  -3  13  -7  374.16   64.73
  -3 -13  -7  300.96   68.24
   3 -13   7  401.65   44.77
  -3 -13  -7  257.26   27.64
   3  13   8   37.31   13.43
  -3  13  -8   25.64   32.43
  -3 -13  -8  -19.95   48.12
   3 -13   8   39.60   18.53
  -3  13  -9  689.36   95.52
  -3 -13  -9  640.95   96.54
   3 -13   9  819.00   73.00
  -3  13 -10   41.12   42.79
  -3 -13 -10  206.44   75.34
   3 -13  10    9.45   11.20
  -3  13 -11   16.67   34.98
  -3 -13 -11   -5.72   53.16
   3 -15 -11  -14.52   41.86
  -3 -15  11   18.59   25.94
   3 -15 -10   34.58   41.12
   3  15  -9  528.44   73.59
   3 -15  -9  566.79  108.64
  -3 -15   9  427.57   61.13
   3  15  -8 1392.12  157.74
   3 -15  -8 2232.96  267.62
  -3 -15   8 1708.48  192.39
   3  15  -7  348.58   45.73
   3 -15  -7  421.03   84.57
  -3 -15   7  268.34   51.07
   3  15  -6 2274.40  137.69
  -3  15   6 2312.51  145.96
  -3 -15   6 2327.55  136.46
  -3 -15   6 2454.57  158.73
   3  15  -5  796.67   75.17
  -3  15   5  722.74   74.65
  -3 -15   5  795.97   73.34
  -3 -15   5  803.84   86.22
   3  15  -4   42.85    8.57
  -3  15   4   78.81   19.96
  -3  15   3  810.55  153.80
   3  15  -3  950.29   41.90
   3  15  -3  809.72   36.21
  -3  15   3  988.23   51.11
  -3  15   3  909.57   37.46
   3 -15  -3  758.40   35.02
  -3 -15   3  945.00  144.49
  -3  15   2 1140.64  125.83
   3  15  -2 1125.53   51.65
   3  15  -2 1044.80   42.75
  -3  15   2  966.47   48.12
  -3 -15   2  774.23   75.65
   3 -15  -2 1157.23   48.71
   3  15  -1 1392.95   69.74
  -3  15   1 1306.06   63.40
   3  15  -1 1411.57  111.57
   3  15  -1 1252.13   60.04
  -3  15   1 1190.81   55.30
   3 -15  -1 1323.30   64.44
   3 -15  -1 1305.00   59.72
  -3 -15   1 1106.02   73.20
   3  15   0 1717.06  160.15
   3  15   0 1773.53  107.20
  -3  15   0 1732.84   80.28
  -3  15   0 1640.88   75.74
  -3 -15   0 1753.88  144.67
  -3 -15   0 1932.05  154.21
   3 -15   0 1742.52   79.76
   3 -15   0 1888.60   85.80
   3  15   1  244.36   46.98
   3  15   1  199.11   31.15
  -3  15  -1  168.92   37.40
  -3  15  -1  187.84   32.20
  -3 -15  -1  218.05   34.21
  -3 -15  -1  144.58   43.73
   3 -15   1  209.57   22.86
   3 -15   1  225.17   35.58
   3  15   2  249.24   39.87
   3  15   2  249.32   28.88
  -3  15  -2  324.43   24.51
  -3  15  -2  234.24   21.66
  -3 -15  -2  304.00   64.80
  -3 -15  -2  299.69   27.86
   3 -15   2  313.69   48.78
   3 -15   2  306.02   56.92
   3  15   3 3270.67  196.66
   3  15   3 3066.25  188.42
  -3  15  -3 2908.88  171.12
  -3  15  -3 3110.43  180.47
  -3 -15  -3 2739.72  173.87
  -3 -15  -3 2890.96  163.11
   3 -15   3 3222.26  196.18
   3 -15   3 3199.66  180.62
  -3  15  -4 1089.98   65.88
   3  15   4  982.88   91.96
  -3 -15  -4 1157.29  152.57
   3 -15   4  917.82  124.93
  -3 -15  -4  953.70   41.46
   3 -15   4 1103.15   57.70
  -3  15  -5 2865.79  182.38
   3  15   5 3399.22  247.66
  -3 -15  -5 2857.85  195.17
   3 -15   5 2575.74  155.28
   3 -15   5 3022.75  187.21
  -3 -15  -5 2776.00  164.97
   3  15   6   29.03    5.74
  -3  15  -6   43.88   27.06
  -3 -15  -6   72.17   43.18
   3 -15   6   85.35   22.24
   3  15   7  151.00   49.75
  -3  15  -7  186.91   67.65
  -3 -15  -7  299.78   86.11
   3 -15   7  285.48   42.75
   3  15   8  143.40   30.35
  -3  15  -8   23.77   54.71
  -3 -15  -8   99.08   83.76
   3 -15   8  147.11   38.83
  -3  15  -9  203.45   60.35
  -3 -15  -9  209.07   50.54
  -3  15 -10  151.62   43.74
  -3 -15 -10  182.53   66.79
   3 -15  10   46.08   22.96
  -3 -17  11   23.17   26.90
   3 -17 -10    7.80   53.69
  -3 -17  10  -10.30   24.67
   3 -17  -9   60.45   45.19
  -3 -17   9   94.09   29.41
   3  17  -8  236.40   38.03
  -3 -17   8  251.01   40.78
   3  17  -7   83.91   14.59
  -3  17   7   59.33   24.10
  -3 -17   7   58.30   15.96
  -3 -17   7   72.00   33.60
   3  17  -6  153.44   26.57
  -3  17   6  176.24   35.10
  -3 -17   6  140.74   18.75
  -3 -17   6  130.48   22.91
   3  17  -5   34.20    6.34
  -3  17   5   31.28   20.13
  -3 -17   5   25.77    3.83
  -3 -17   5  101.46   36.00
   3  17  -4  254.37   25.25
  -3  17   4  160.09   22.91
   3  17  -3    7.67    5.37
   3  17  -3   -0.39    3.38
  -3  17   3   43.82   23.45
  -3 -17   3   -8.60   43.00
   3 -17  -3    8.09    4.83
  -3  17   2 1574.93  121.24
   3  17  -2 1475.65   66.93
   3  17  -2 1461.43   59.93
  -3  17   2 1655.83   75.37
  -3  17   2 1571.99   69.02
   3 -17  -2 1638.76   67.70
  -3 -17   2 1665.14  119.27
   3  17  -1  411.96   32.60
   3  17  -1  408.05   20.05
  -3  17   1  330.33   25.59
  -3  17   1  399.19   22.77
   3  17  -1  430.45   74.95
  -3 -17   1  301.99   36.42
   3 -17  -1  354.02   19.93
   3 -17  -1  319.55   21.88
   3  17   0  335.70   89.59
   3  17   0  397.41   33.00
  -3  17   0  511.23   85.16
  -3  17   0  379.27   58.92
  -3 -17   0  366.64   40.03
  -3 -17   0  439.90   47.64
   3 -17   0  379.27   62.96
   3 -17   0  425.91   24.82
   3  17   1   85.46   32.12
   3  17   1   79.25   23.50
  -3  17  -1   59.71   13.80
  -3  17  -1   75.67   15.83
  -3 -17  -1  119.28   30.05
  -3 -17  -1   74.28   38.94
   3 -17   1   56.80   11.65
   3 -17   1   93.77   16.02
   3  17   2  474.02   56.80
   3  17   2  300.85   36.71
  -3  17  -2  427.60   79.32
  -3  17  -2  300.14   22.03
  -3 -17  -2  345.12   95.27
  -3 -17  -2  356.40   27.98
   3 -17   2  414.97   24.96
   3 -17   2  392.42   29.05
   3  17   3  364.74   46.37
   3  17   3  631.78   75.21
  -3  17  -3  622.61   64.34
   3 -17   3  582.20   57.91
  -3 -17  -3  668.98   81.24
  -3 -17  -3  581.00   81.03
   3 -17   3  670.27   92.74
  -3  17  -4 2814.63  185.46
   3  17   4 1988.38  131.90
  -3 -17  -4 2483.30  172.72
   3 -17   4 2485.14  151.65
  -3 -17  -4 2514.15  151.16
   3 -17   4 2571.45  163.72
   3  17   5   40.04   15.15
  -3  17  -5   67.27   27.22
  -3 -17  -5   89.56   46.38
  -3 -17  -5   28.88    9.51
   3 -17   5   37.04   24.29
   3  17   6   44.40   21.32
  -3  17  -6   29.13   22.04
  -3 -17  -6   75.31   44.50
   3 -17   6   35.44   24.12
   3  17   7  255.86   64.15
  -3  17  -7  323.73   81.77
  -3 -17  -7  129.26   44.20
   3 -17   7  186.81   38.13
  -3  17  -8   12.43   32.27
  -3 -17  -8  126.08   50.84
   3 -17   8  121.24   26.83
  -3  17  -9  132.18   58.97
  -3 -17  -9   30.58   55.59
  -3  17 -10   74.29   37.83
  -3 -17 -10   23.58   63.21
   3 -17  10   -5.49   20.65
  -3  19  10   55.45   22.93
  -3 -19  10  167.62   34.45
  -3  19   9   99.68   27.16
  -3 -19   9   41.79   24.49
  -3  19   8  334.28   93.39
  -3 -19   8  362.63   52.72
   3  19  -7   26.89   12.98
  -3  19   7   51.22   21.88
  -3 -19   7   88.58   32.38
   3  19  -6    9.62    6.14
  -3  19   6   23.47   21.68
  -3 -19   6   13.61    4.50
  -3 -19   6   18.76   29.14
   3  19  -5 1916.88  168.65
  -3  19   5 2029.93  183.40
  -3 -19   5 2205.25  203.46
   3  19  -4   51.58   10.65
  -3  19   4   77.63   18.12
  -3 -19   4   36.63   16.17
   3  19  -3  175.15   16.55
   3  19  -3  164.14   27.24
  -3  19   3  189.73   45.67
   3 -19  -3  127.90   35.76
   3 -19  -3  125.38   12.88
   3  19  -2    8.00   11.52
   3  19  -2    0.39    4.37
  -3  19   2   27.85   14.79
  -3 -19   2   69.15   44.43
   3 -19  -2    5.65    5.15
   3  19  -1  364.93   27.38
   3  19  -1  343.72   14.37
  -3  19   1  423.98   64.08
  -3  19   1  381.91   20.00
   3 -19  -1  376.34   24.51
   3 -19  -1  316.41   15.82
  -3 -19   1  302.48   42.55
   3  19   0  229.68   32.64
  -3  19   0  250.10   38.26
  -3  19   0  179.68   16.83
   3  19   0  164.88   24.24
   3  19   0  220.07   53.75
   3 -19   0  222.12   43.05
   3 -19   0  166.04   14.61
   3  19   1 2576.34  322.03
   3  19   1 2843.52  173.40
  -3  19  -1 2656.82  158.99
  -3  19  -1 2665.86  154.85
  -3 -19  -1 2712.81  174.10
  -3 -19  -1 3160.02  194.08
   3 -19   1 2772.29  159.65
   3 -19   1 2714.02  155.34
  -3  19  -2   35.45   20.52
   3  19   2   32.70   19.30
  -3 -19  -2   49.53   37.79
   3 -19   2   54.19   11.29
  -3 -19  -2   37.43    9.69
   3 -19   2   53.52   19.41
   3  19   3  229.19   44.01
  -3  19  -3  257.64   52.05
  -3 -19  -3  221.86   50.45
  -3 -19  -3  198.17   31.13
   3 -19   3  230.93   62.78
  -3  19  -4   16.77    8.87
  -3 -19  -4    0.15   34.95
   3 -19   4   10.78    9.16
  -3 -19  -4   -0.95    3.99
   3 -19   4   33.06   18.82
  -3  19  -5  198.73   65.22
   3  19   5  171.95   35.94
  -3 -19  -5  193.02   38.13
   3 -19   5  253.34   59.15
   3  19   6   12.16   15.28
  -3  19  -6   22.89   20.83
  -3 -19  -6   37.62   49.96
   3 -19   6   52.55   37.50
  -3 -19  -6    9.86    8.56
   3  19   7  579.97   70.37
  -3  19  -7  557.88   49.41
  -3 -19  -7  785.12   85.19
   3 -19   7  659.77   46.06
  -3  19  -8  210.20   48.74
  -3 -19  -8   86.86   53.06
  -3  19  -9    3.32   33.53
  -3 -19  -9   -9.22   55.13
  -3  19 -10   38.11   40.37
  -3 -19 -10   84.11   52.35
   3 -19  10   23.35   18.47
  -3  21  10  173.21   60.92
  -3 -21  10  157.86   49.66
  -3  21   9  194.18   76.43
  -3  21   8   90.89   22.99
  -3 -21   8   88.53   37.66
  -3  21   7  655.15  139.05
  -3 -21   7  785.05  105.12
   3  21  -6   80.83   23.00
   3  21  -6  137.31   30.23
  -3  21   6  256.80   42.32
  -3 -21   6  369.78   54.80
   3  21  -5  152.48   47.43
   3  21  -5  196.73   48.63
  -3  21   5  244.08   40.35
  -3 -21   5  255.45   67.39
   3  21  -4 1095.13   71.69
   3  21  -4 1193.53   73.16
  -3  21   4 1237.24   83.92
  -3 -21   4 1236.00  115.22
   3  21  -3 1001.59   66.75
   3  21  -3 1212.67   74.31
  -3  21   3  942.49   65.75
   3 -21  -3 1140.19  113.09
   3 -21  -3 1007.44   60.93
   3  21  -2  426.87   87.65
   3  21  -2  587.94   55.89
  -3  21   2  457.64   60.19
   3 -21  -2  487.11   47.42
   3  21  -1 1459.21   68.63
  -3  21   1 1412.05   64.86
   3  21  -1 1541.51   57.03
  -3 -21   1 1019.26   74.68
   3 -21  -1 1424.74   55.40
   3  21   0 1757.83   83.56
  -3  21   0 1560.20   79.24
   3  21   0 1600.46   62.21
  -3  21   0 1585.46   64.03
   3 -21   0 1502.65   60.40
  -3 -21   0 1588.46   89.21
  -3  21  -1 2369.32  145.40
   3  21   1 2640.18  174.07
  -3  21  -1 2562.93  158.93
   3  21   1 2487.19  177.41
  -3 -21  -1 2782.86  183.28
   3 -21   1 2485.35  153.12
  -3 -21  -1 2908.46  202.70
   3  21   2  946.58  141.14
   3  21   2  724.86   83.98
  -3  21  -2  927.86   67.94
   3 -21   2  736.93   73.51
  -3 -21  -2  537.23  147.57
  -3 -21  -2  642.98   83.66
   3 -21   2  792.72   81.28
   3  21   3  744.84  173.42
  -3  21  -3  837.86  151.63
  -3 -21  -3  817.36   78.74
  -3 -21  -3 1140.93   74.50
   3 -21   3  977.85  135.35
   3  21   4  306.91   92.84
  -3  21  -4  309.58   73.58
  -3 -21  -4  515.54   95.57
  -3 -21  -4  368.70   71.61
   3 -21   4  444.58  103.14
   3  21   5 1019.14  110.67
  -3  21  -5 1206.03  125.63
  -3 -21  -5 1030.43  134.07
  -3 -21  -5  950.86   87.94
   3 -21   5 1050.93  150.99
   3  21   6  455.55   87.72
  -3  21  -6  306.63   64.23
  -3 -21  -6  435.94   80.62
   3 -21   6  483.00   68.39
  -3  21  -7  154.83   39.30
  -3 -21  -7  284.12   67.42
   3 -21   7  155.50   26.60
  -3  21  -8   90.67   45.62
  -3 -21  -8  131.41   55.27
   3 -21   8  114.41   26.36
  -3  21  -9   -8.34   33.95
  -3 -21  -9  -25.07   52.46
   3 -21   9   32.14   29.19
  -3  21 -10   -1.22   28.55
  -3 -21 -10   14.99   49.28
   3 -21  10   17.65   26.55
  -3  23  10   67.07   39.44
  -3 -23  10   55.66   43.52
  -3  23   9   36.59   27.75
  -3 -23   9   69.99   37.20
  -3  23   8   -1.06   22.58
  -3 -23   8   -5.40   25.47
  -3  23   7   55.97   25.62
  -3 -23   7   37.64   28.11
  -3  23   6   76.48   20.86
  -3 -23   6   42.33   30.54
   3  23  -5  756.20   71.51
   3  23  -5  891.42   83.25
  -3  23   5  873.43   91.72
  -3 -23   5  916.30   97.75
   3  23  -4   55.57   14.75
   3  23  -4   44.24   14.21
  -3  23   4   47.21   19.85
  -3 -23   4  146.18   47.21
   3  23  -3  206.67   61.78
   3  23  -3  382.68   58.06
  -3  23   3  384.98   63.17
   3 -23  -3  297.63   66.33
   3 -23  -3  319.87   51.49
  -3 -23   3  401.77   66.08
   3  23  -2  537.30   89.01
   3  23  -2  535.97   55.14
  -3  23   2  519.71  107.18
   3 -23  -2  440.69   60.23
   3 -23  -2  561.41   57.91
   3  23  -1  221.64   63.49
  -3  23   1  381.62   73.07
   3  23  -1  322.82   35.52
  -3 -23   1  200.58   49.83
   3 -23  -1  380.98   81.87
   3  23   0 1745.33  117.82
  -3  23   0 1806.19  112.28
   3  23   0 1919.30  117.50
   3 -23   0 1995.31  123.05
  -3  23  -1 4502.11  280.56
   3  23   1 4722.73  278.90
   3 -23   1 4644.66  276.27
  -3  23  -2 1148.82   86.67
  -3 -23  -2  751.73   74.67
  -3 -23  -2  741.75   70.36
   3 -23   2  960.84   68.27
   3  23   3  357.78   67.50
  -3  23  -3  608.40   90.76
  -3 -23  -3  418.77  151.60
  -3 -23  -3  557.61  102.44
   3 -23   3  477.76  124.03
   3  23   4  653.29  128.77
  -3  23  -4  866.48   75.07
  -3 -23  -4  722.93  191.16
   3 -23   4  913.84  125.74
   3  23   5   10.48   19.31
  -3  23  -5   12.75   31.17
  -3 -23  -5   15.42   38.47
  -3 -23  -5    3.02    2.48
   3 -23   5   -3.73   26.53
   3  23   6  387.99  147.48
  -3  23  -6  632.77   90.56
  -3 -23  -6  936.56   88.36
   3 -23   6  895.74   51.69
  -3  23  -7  285.60   65.99
  -3 -23  -7  203.79   59.25
   3 -23   7  359.83   53.77
  -3  23  -8  331.38  100.25
  -3 -23  -8   91.34   61.55
   3 -23   8  284.47   49.44
  -3  23  -9   77.30   46.49
  -3 -23  -9  167.14   87.79
   3 -23   9   45.62   24.72
  -3  25   9   31.64   24.26
  -3 -25   9  -17.06   27.54
  -3  25   8   49.14   30.42
  -3 -25   8  -36.55   29.13
  -3  25   7   11.38   21.93
  -3  25   6   33.15   21.31
  -3 -25   6   38.02   27.46
   3  25  -5  574.50   78.97
  -3  25   5  651.53  107.38
  -3 -25   5  596.60  167.18
   3  25  -4   29.76   13.39
   3  25  -4   10.39    6.03
  -3  25   4   50.80   14.49
  -3 -25   4   -0.95   22.14
   3  25  -3  127.22   33.10
   3  25  -3  178.05   47.48
  -3  25   3  159.71   35.94
   3 -25  -3  166.36   33.80
  -3 -25   3  182.39   53.34
   3  25  -2   15.64   12.41
   3  25  -2   24.49    3.90
  -3  25   2   50.16   25.89
   3 -25  -2   12.50   14.01
   3 -25  -2   14.42    4.73
  -3 -25   2   31.51   30.29
   3  25  -1 1685.09  244.51
  -3  25   1 1764.83  160.87
   3 -25  -1 1749.18  156.23
  -3  25   0   35.81   11.37
   3  25   0    7.20   10.98
  -3 -25   0   22.30   30.91
   3 -25   0   11.26   17.08
   3  25   1  181.93   47.94
  -3  25  -1  136.85   28.31
   3  25   1  101.55   25.65
  -3 -25  -1  133.53   37.25
   3 -25   1  112.69   19.55
  -3  25  -2   -0.92   18.53
  -3 -25  -2   92.49   34.05
  -3 -25  -2   28.18   19.22
   3 -25   2   37.35   14.23
  -3  25  -3  109.83   44.46
  -3 -25  -3  118.32   55.85
  -3 -25  -3  167.15   38.37
   3 -25   3  142.87   37.24
  -3  25  -4  245.76   63.78
  -3 -25  -4  145.92   80.38
  -3 -25  -4  136.70   41.17
   3 -25   4  230.57   66.34
  -3  25  -5   66.42   34.67
  -3 -25  -5    9.79   28.22
   3 -25   5   40.14   11.19
  -3 -25  -6   39.62   21.65
   3 -25   6   58.58   24.20
  -3  25  -7    9.61   15.81
  -3 -25  -7   31.83   30.98
   3 -25   7   49.21   29.58
  -3  25  -8   -2.66   40.00
  -3 -25  -8  -11.32   51.39
  -3 -25  -9  122.25   52.21
   3 -25   9   36.87   19.16
  -3  27   9  135.77   45.19
  -3 -27   9   28.48   38.32
  -3  27   8  254.19   37.49
  -3 -27   7  228.04   60.87
  -3  27   5   40.24   22.32
  -3 -27   5   32.84   28.05
   3  27  -4   62.63   14.77
  -3  27   4  141.67   27.51
  -3 -27   4  107.28   25.76
   3  27  -3  286.13   52.84
   3  27  -3  362.51   46.31
  -3  27   3  343.90   71.32
   3 -27  -3  258.08   31.04
   3 -27  -3  280.10   33.60
  -3 -27   3  381.04   48.92
   3  27  -2  837.05   85.67
   3  27  -2  895.02   84.10
  -3  27   2  852.08   98.53
   3 -27  -2  874.24   82.26
  -3 -27   2  922.33   96.09
   3  27  -1   98.55   35.69
  -3  27   1  116.05   32.02
   3  27  -1   49.96   13.65
   3 -27  -1   47.49   27.74
   3 -27  -1   48.80    9.49
  -3 -27   1   85.67   33.15
   3  27   0   72.82   38.70
  -3  27   0   68.72   23.19
   3  27   0   74.01   24.46
   3 -27   0   73.90   19.34
  -3  27  -1   26.22    7.66
   3 -27   1   14.81   14.10
  -3  27  -2   20.39   12.86
   3  27   2   11.03   14.03
   3 -27   2   12.26   17.72
  -3  27  -3  176.25   44.23
  -3 -27  -3  167.53   57.69
  -3 -27  -3  104.01   28.99
   3 -27   3  123.17   26.90
  -3  27  -4  311.28   92.88
  -3 -27  -4  124.36   79.44
   3 -27   4  324.31   96.60
  -3  27  -5  547.15  153.20
  -3 -27  -5  502.05  177.21
   3 -27   5  474.45  107.17
  -3  27  -6   21.92   13.77
  -3 -27  -6  -47.90   48.69
   3 -27   6   35.49   25.53
  -3  27  -7   26.50   30.86
  -3 -27  -7  103.28   75.81
   3 -27   7   32.09   33.45
  -3  27  -8  -12.25   35.27
  -3 -27  -8  -12.84   43.55
  -3  29   8   82.37   25.49
  -3 -29   8   26.68   35.54
  -3  29   7   80.44   25.77
  -3 -29   7   92.36   40.40
  -3  29   6  185.17   38.52
  -3 -29   6  141.68   60.06
  -3  29   5   26.16   18.14
  -3 -29   5   10.78   29.34
   3  29  -4  234.36   17.77
  -3  29   4  358.72   82.48
  -3 -29   4  326.06   32.96
   3  29  -3  549.92   22.91
  -3  29   3  392.20  116.01
   3 -29  -3  490.34   16.04
  -3 -29   3  492.90  153.16
   3  29  -2  122.64   41.83
   3  29  -2  135.47   36.97
  -3  29   2  200.56   57.65
   3 -29  -2  145.68   31.52
  -3 -29   2  155.39   36.91
  -3  29   1  239.03   69.54
   3  29  -1  313.90   51.88
   3 -29  -1  243.89   53.67
  -3 -29   1  311.79   71.02
  -3  29   0  386.26   82.35
   3  29   0  279.15   69.78
   3 -29   0  333.27   79.31
  -3 -29   0  337.43   54.69
  -3  29  -1  491.10  127.94
   3  29   1  545.78   66.35
   3 -29   1  403.06  112.29
  -3 -29  -1  645.56   78.46
  -3  29  -2  697.73  128.35
   3  29   2  670.29   35.85
   3 -29   2  674.46  113.96
  -3  29  -3  480.02   35.87
   3  29   3  373.75   98.39
   3 -29   3  620.01   44.31
  -3  29  -4  686.32   87.59
  -3 -29  -4  687.53  108.60
   3 -29   4  993.89  125.14
  -3  29  -5 1095.73  186.87
  -3 -29  -5  615.26  318.64
   3 -29   5  931.82   77.97
  -3  29  -6  178.61   57.53
  -3 -29  -6   86.09   52.28
   3 -29   6  141.96   30.55
  -3  29  -7   30.13   17.94
  -3 -29  -7   73.12   31.79
   3 -29   7   51.24   33.52
  -3 -29  -8  -36.71   60.03
   3 -29   8   11.13   16.33
  -3  31   7  115.20   45.10
  -3 -31   7   68.40   45.92
  -3  31   6   14.75   12.98
  -3 -31   6   26.23   28.15
  -3  31   5  195.15   25.86
  -3 -31   5   70.01   31.12
  -3  31   4  150.87   33.14
  -3 -31   4  149.91   29.74
   3  31  -3    4.64    8.60
  -3  31   3   44.70   21.44
  -3 -31   3  -12.68   26.51
  -3  31   2  431.27  118.36
   3  31  -2  467.70   75.38
   3 -31  -2  412.08   50.23
  -3 -31   2  420.25   58.56
   3  31  -1   13.30    9.41
  -3  31   1   33.56   16.64
   3 -31  -1    2.63   10.75
  -3 -31   1   21.26   13.07
  -3  31   0   11.89   16.63
   3  31   0   20.39   10.37
   3 -31   0   26.68    9.48
  -3 -31   0   35.27   16.37
  -3  31  -1   -0.60   14.34
   3  31   1   18.73   17.42
   3 -31   1   11.89   15.16
  -3 -31  -1   42.40   22.65
  -3  31  -2  138.16   61.89
   3  31   2  192.11   21.39
   3 -31   2  155.02   26.23
  -3  31  -3   21.05   20.44
   3  31   3   33.42   18.51
  -3 -31  -3   17.67   12.06
  -3  31  -4   84.43   19.82
   3  31   4  114.16   20.47
   3 -31   4  119.82   46.57
  -3  31  -5   -0.71   18.25
  -3 -31  -5   22.87   41.10
   3 -31   5    7.45   24.90
  -3  31  -6   49.25   29.61
  -3 -31  -6   82.62   47.42
   3 -31   6  123.11   43.94
  -3 -31  -7   90.37   55.51
   3 -31   7   18.34   23.83
  -3  33   7  115.49   65.78
  -3 -33   7   27.90   27.48
  -3  33   6   61.59   23.88
  -3 -33   6   33.36   34.88
  -3  33   5   51.13   22.04
  -3 -33   5   50.18   31.57
  -3  33   4   -0.25   17.90
  -3 -33   4   74.75   30.15
  -3  33   3   28.64   10.56
  -3 -33   3   72.95   26.09
  -3  33   2   14.93   12.40
   3  33  -2   18.45   12.30
   3  33  -1   95.28   24.56
  -3  33   1  103.08   47.14
   3 -33  -1   91.51   18.36
  -3 -33   1  101.50   27.24
  -3  33   0  253.44   40.03
   3  33   0  220.77   68.69
   3 -33   0  208.32   57.41
  -3 -33   0  228.04   26.21
  -3  33  -1   42.94   14.80
   3  33   1   60.45   21.46
   3 -33   1   27.66   17.76
  -3 -33  -1   21.90   14.36
  -3  33  -2   14.26   11.83
   3  33   2   26.79   16.81
  -3 -33  -2    6.81   17.27
  -3  33  -3   71.36   35.62
   3  33   3  179.69   29.13
   3 -33   3  115.12   30.59
  -3  33  -4  253.44   58.25
   3  33   4  451.60   38.00
   3 -33   4  463.89   43.66
   3  33   5   46.60   23.07
   3 -33   5   24.48   20.18
  -3  33  -6   58.51   25.93
   3 -33   6   88.10   30.33
  -3  35   6   39.13   14.07
  -3 -35   6   17.91   29.24
  -3  35   5  122.98   49.21
  -3 -35   5  152.11   61.90
  -3  35   4   20.69   19.50
  -3  35   3   26.32   14.60
  -3 -35   3   16.49   26.92
  -3  35   2   56.18   20.42
  -3 -35   2  126.13   27.23
  -3  35   1  361.06   84.26
   3 -35  -1  395.33   27.52
  -3 -35   1  424.36   41.48
  -3  35   0   10.12   11.85
   3 -35   0   39.12   15.83
  -3 -35   0   43.21   19.52
  -3  35  -1  499.31   91.68
   3  35   1  483.80   57.23
   3 -35   1  422.74   89.67
  -3 -35  -1  612.53   39.50
  -3  35  -2  198.91   93.00
   3  35   2  209.12   78.18
   3 -35   2  207.40   74.85
  -3  35  -3  115.35   33.12
   3  35   3   84.77   19.85
   3 -35   3   35.04   20.03
  -3  35  -4   73.21   35.05
   3  35   4   82.87   23.20
   3 -35   4  232.21   63.16
   3  35   5   22.61   20.17
   3 -35   5   33.52   25.21
  -3  37   4   10.69   12.59
  -3 -37   4   29.14   18.70
  -3  37   3   44.58   25.69
  -3 -37   3   20.06   19.92
  -3  37   2  179.97   31.30
  -3 -37   2   65.63   22.32
  -3  37   1   28.03   19.65
  -3 -37   1   61.16   24.91
   3  37   0   87.42   25.93
  -3  37   0  136.41   33.55
   3 -37   0   90.24   28.10
  -3  37  -1   59.60   24.85
  -3  37  -2   82.65   32.99
   3  37   2   91.73   22.71
   3 -37   2  126.59   45.90
  -3  37  -3  146.81   50.32
   3  37   3  118.38   34.11
   3 -37   3   72.68   22.02
   3  37   4   -6.49   18.85
   3 -37   4   25.80   25.48
  -3  39   2   55.07   35.67
  -3 -39   2   29.09   20.38
  -3  39   1   29.88   19.43
  -3 -39   1   13.75   21.65
  -3  39  -1  105.85   55.13
   3  39   1  112.02   72.37
  -3  39  -2   40.22   21.05
   3  39   2   64.17   22.15
   3 -39   2   72.58   15.66
   4   0 -12   40.54   29.26
   4   0 -11   -1.86   30.13
   4   0 -10  556.53  241.39
  -4   0  10  639.91   80.95
   4   0  -9   20.28   25.02
  -4   0   9   30.73   17.63
   4   0  -8   44.73   21.85
  -4   0   8   11.16   19.70
   4   0  -7   21.51   16.51
  -4   0   7   51.83   27.73
   4   0  -6  257.59   56.43
  -4   0   6  142.26   21.86
  -4   0   5   59.94   19.57
  -4   0   5   12.52   11.42
  -4   0   5   49.94   22.93
  -4   0   414486.79  423.71
  -4   0   413993.79  398.23
   4   0  -413565.52  422.60
  -4   0   413571.85  408.62
  -4   0   3   24.27   20.28
  -4   0   3   12.63    6.03
   4   0  -3  -12.18   40.48
  -4   0   3    9.42   15.70
   4   0  -2 6365.99  153.27
   4   0  -2 5451.59  163.41
  -4   0   1   42.05   10.85
   4   0  -1    9.05    5.99
  -4   0   1   35.51    9.44
   4   0  -1   21.12   21.89
   4   0   0 1668.12  103.02
  -4   0   0 1338.12   86.16
   4   0   0 1748.58  113.30
  -4   0   0 1509.09   94.49
  -4   0  -1   -1.86   29.32
   4   0   1   24.76   13.77
   4   0   1    3.98   12.16
  -4   0  -1    6.16   11.22
  -4   0  -2 2481.73  142.73
   4   0   2 2869.88   89.77
   4   0   2 2229.23   64.46
  -4   0  -2 2459.35   68.14
  -4   0  -3   89.91   34.16
   4   0   3  -13.14   23.94
   4   0   3   31.44   14.17
  -4   0  -3   22.92   12.99
  -4   0  -4   65.23   36.48
   4   0   4   19.85   17.80
   4   0   4   22.08   16.54
  -4   0  -4   13.28   13.64
  -4   0  -5   36.28   26.89
   4   0   5   44.66   25.58
   4   0   5    2.91   12.76
  -4   0  -5    0.73   13.12
  -4   0  -6  483.19   63.68
   4   0   6  511.79   63.90
  -4   0  -6  634.78   76.59
  -4   0  -7   84.68   43.22
   4   0   7    7.80   11.33
  -4   0  -8  239.78   71.82
   4   0   8  136.60   27.22
  -4   0  -9   28.33   47.51
   4   0   9   29.23   12.33
  -4   0 -10   56.62   48.85
  -4   0 -11   96.40   52.23
   4   0  11   24.00   17.58
   4  -2 -12  -19.08   32.56
  -4  -2  12   27.14   20.30
   4   2 -11   32.46   25.55
   4  -2 -11   34.91   21.95
  -4  -2  11  -14.11   19.38
   4   2 -10   41.69   18.27
   4  -2 -10   44.69   26.79
  -4  -2  10   24.92   13.02
   4   2  -9  753.48  240.21
  -4   2   9  859.39   99.01
  -4  -2   9  944.50  109.41
   4  -2  -9  835.96  210.55
   4   2  -8  194.37   57.17
  -4   2   8  175.64   52.00
  -4   2   8  188.66   39.17
   4  -2  -8  175.52   78.29
  -4  -2   8   77.76   28.02
  -4  -2   8  237.03   76.00
  -4   2   7   27.38   25.04
   4   2  -7   78.16   32.40
  -4   2   7   56.49   23.28
   4  -2  -7  116.56   43.59
  -4  -2   7   95.22   49.68
  -4  -2   7  100.51   33.43
  -4  -2   7   83.86   27.76
  -4   2   6   43.70   22.86
   4   2  -6   24.33   19.61
  -4   2   6   31.56   24.26
   4  -2  -6   -1.11   21.73
  -4  -2   6   67.21   43.83
  -4  -2   6   22.33   17.95
  -4   2   5 4221.16  181.88
  -4   2   5 4026.22  178.38
  -4   2   5 4403.98  176.34
  -4  -2   5 4379.87  183.69
  -4  -2   5 3772.82  177.42
  -4   2   4  363.16   37.83
   4   2  -4  521.77  107.03
  -4   2   4  343.08   28.02
  -4   2   4  404.37   41.28
  -4  -2   4  390.09   29.74
   4  -2  -4  453.51  112.11
  -4  -2   4  268.01   35.94
  -4  -2   4  497.31   44.04
   4   2  -328117.68  825.57
  -4   2   328261.25  807.59
  -4   2   329502.07  827.80
  -4   2   339174.30 2520.26
  -4  -2   329856.14 1918.73
  -4  -2   330082.26 1929.30
  -4  -2   330362.58 1958.62
   4  -2  -324631.76  712.82
  -4   2   2 1871.21  114.25
   4   2  -2 1754.93  105.66
   4   2  -2 1655.05  196.06
  -4   2   2 1731.53  107.97
   4  -2  -2 2417.88   92.85
  -4  -2   2 1793.84  107.52
   4  -2  -2 1921.92  116.41
  -4  -2   2 2119.59  111.48
   4   2  -1   60.91   34.65
   4   2  -1   82.22   16.23
  -4   2   1   68.17   14.82
  -4   2   1   70.04   10.10
  -4  -2   1   52.68    8.45
   4  -2  -1   43.03    8.61
   4  -2  -1   56.57   19.73
  -4  -2   1   69.53   18.75
   4   2   0  199.11   18.72
  -4   2   0  190.48   26.62
  -4   2   0  205.94   19.71
   4   2   0  268.73   40.95
  -4  -2   0  284.70   30.02
   4  -2   0  159.65   13.93
  -4  -2   0  337.30   77.29
   4  -2   0  190.41   40.34
  -4   2  -115291.17  367.53
   4   2   116109.54  389.79
  -4  -2  -117250.21  418.15
   4  -2   117930.01  426.01
  -4  -2  -117425.89  412.22
   4  -2   117687.99  420.08
   4   2   2  331.28   59.94
   4   2   2  294.60   30.79
  -4   2  -2  414.82  110.15
  -4   2  -2  294.23   20.27
  -4  -2  -2  391.66   93.01
  -4  -2  -2  355.87   65.14
   4  -2   2  311.88   25.82
   4  -2   2  263.52   43.08
   4   2   3  696.72   38.75
  -4   2  -3  569.61   58.38
   4   2   3  686.05   59.33
  -4   2  -3  550.69   33.80
   4  -2   3  776.37   54.92
  -4  -2  -3  554.12   46.48
   4  -2   3  583.45   34.01
  -4  -2  -3  621.29   58.26
  -4   2  -4 4061.15  216.27
   4   2   4 4494.00  182.78
  -4   2  -4 4355.55  178.45
  -4  -2  -4 4009.41  183.64
  -4  -2  -4 4241.16  172.19
   4  -2   4 4180.38  176.55
   4  -2   4 4741.23  207.55
   4   2   5  310.37   46.31
  -4   2  -5  239.45   39.63
  -4   2  -5  203.52   19.85
   4   2   5  190.93   26.66
  -4  -2  -5  152.27   36.05
   4  -2   5  343.59   44.16
   4  -2   5  160.26   50.66
  -4  -2  -5  214.39   19.36
  -4   2  -6  387.03   56.69
   4   2   6  384.21   43.38
  -4  -2  -6  313.93   64.47
   4  -2   6  364.89   98.53
  -4  -2  -6  393.90   43.67
  -4   2  -7  980.18  232.13
   4   2   7 1237.27  115.15
  -4  -2  -7  857.51  102.43
   4  -2   7 1036.62   98.97
   4   2   8  168.05   49.16
  -4   2  -8  174.23   54.72
  -4  -2  -8  267.32   56.28
   4  -2   8  208.83   31.81
  -4   2  -9   18.03   26.30
   4   2   9   51.36   22.24
  -4  -2  -9    9.61   43.27
   4   2  10  118.05   28.06
  -4   2 -10  106.54   53.40
  -4  -2 -10   12.26   48.14
   4  -2  10   56.61   21.83
  -4   2 -11   36.19   62.46
   4   2  11   19.75   16.75
  -4  -2 -11   15.60   51.83
   4  -2  11  -16.87   15.07
   4  -4 -12   52.81   46.71
  -4  -4  12   27.29   25.48
   4  -4 -11   54.80   36.69
  -4  -4  11  109.98   32.60
   4   4 -10   87.55   36.11
   4  -4 -10   80.71   37.75
  -4  -4  10   79.16   27.31
   4   4  -9  248.76   89.31
  -4   4   9   52.46   30.50
  -4   4   9  250.87   72.02
   4  -4  -9  190.56   87.52
  -4  -4   9  187.84   61.04
  -4  -4   9  208.64   38.39
   4   4  -8  117.04   32.15
  -4   4   8   52.85   27.78
  -4   4   8  132.77   30.65
   4  -4  -8   93.33   35.47
  -4  -4   8   73.46   28.64
  -4  -4   8   45.98   20.53
   4   4  -7  392.15  110.29
  -4   4   7  364.03   43.22
  -4   4   7  419.72   57.03
  -4   4   7  178.89   61.23
  -4  -4   7  328.88   44.54
   4  -4  -7  271.06   90.00
  -4  -4   7  326.63   40.77
   4   4  -6   85.53   23.99
  -4   4   6  111.30   34.18
  -4   4   6  143.17   33.25
  -4  -4   6  101.81   22.11
  -4  -4   6   56.93   43.76
   4  -4  -6  193.42   45.64
  -4   4   5  579.77   45.98
  -4   4   5  647.23   49.69
  -4   4   5  488.89  113.14
  -4  -4   5  642.45   44.45
  -4  -4   5  691.76   67.23
  -4   4   4 1027.27   64.45
   4   4  -4  896.34   94.97
  -4   4   4 1228.08   68.97
  -4   4   4  921.27   41.38
   4  -4  -4 1146.82   81.10
  -4  -4   4  988.43   51.34
  -4  -4   4  995.92   45.20
  -4  -4   4  968.15   65.70
   4   4  -3 7220.26  247.99
  -4   4   3 7656.96  237.34
  -4   4   3 6970.39  202.59
  -4   4   3 7096.60  208.76
  -4  -4   3 8311.75  234.87
  -4  -4   3 7888.53  230.07
   4  -4  -3 6660.15  209.94
  -4  -4   3 7222.95  237.48
  -4   4   2  719.88   47.17
   4   4  -2  745.45   45.82
  -4   4   2 1002.75   66.63
   4   4  -2  535.51   59.03
  -4  -4   2  816.54   50.31
   4  -4  -2 1076.80  167.86
  -4  -4   2  873.34  133.26
   4  -4  -2  737.83   48.09
  -4   4   1 7839.00  189.20
  -4   4   1 7710.78  186.59
   4  -4  -1 7469.36  180.26
   4   4   0  966.21   66.18
  -4   4   0 1439.35   90.76
   4   4   0 1072.14   67.47
  -4   4   0 1325.67   83.23
   4  -4   0 1243.95   77.24
  -4  -4   0 1600.67  102.55
  -4  -4   0 1291.64   96.66
   4  -4   0 1361.14   86.01
   4   4   1  730.70  131.01
   4   4   1  761.27   90.06
  -4   4  -1  455.00   34.96
  -4   4  -1  540.91   38.24
   4  -4   1  763.95   56.17
  -4  -4  -1  677.18  106.91
  -4  -4  -1  642.09   53.07
   4  -4   1  526.99   59.85
   4   4   2  349.61   68.70
  -4   4  -2  329.96   74.26
   4   4   2  205.37   45.36
  -4   4  -2  208.35   20.21
   4  -4   2  234.46   24.69
  -4  -4  -2  253.15   49.55
  -4  -4  -2  227.43   42.22
   4  -4   2  234.95   51.88
   4   4   3 1678.16   61.86
   4   4   3 1568.43   87.43
  -4   4  -3 1776.74  172.47
  -4   4  -3 1727.76   61.71
  -4  -4  -3 1717.18   83.29
   4  -4   3 1569.92   90.96
  -4  -4  -3 1738.53   58.96
   4  -4   3 1755.27   64.24
   4   4   4  471.47   87.79
   4   4   4  266.83   57.92
  -4   4  -4  356.68   42.75
  -4   4  -4  415.24   30.36
  -4  -4  -4  337.88   39.60
  -4  -4  -4  398.57   67.30
   4  -4   4  462.59   76.70
   4  -4   4  249.30   44.78
  -4   4  -5 2062.47  138.16
   4   4   5 2289.63  140.16
  -4   4  -5 1941.25  115.69
  -4  -4  -5 2036.38  141.08
   4  -4   5 2242.36  138.48
   4  -4   5 2010.17  120.39
  -4  -4  -5 2360.45  137.05
  -4   4  -6 1173.31  102.24
   4   4   6  832.03   36.80
  -4  -4  -6 1138.47  101.86
   4  -4   6  925.74   64.40
  -4  -4  -6  786.61   91.14
   4   4   7  557.46  110.12
  -4   4  -7  517.27   96.51
  -4  -4  -7  410.86   85.66
   4  -4   7  479.33   71.54
   4   4   8  295.93   42.58
  -4   4  -8  380.66   62.93
  -4  -4  -8  202.83   56.95
   4  -4   8  252.84   51.73
   4   4   9   53.00   15.31
  -4   4  -9   67.76   48.28
  -4  -4  -9   71.02   51.93
   4  -4   9   46.98   16.99
   4   4  10   51.81   19.61
  -4   4 -10   30.65   34.98
  -4  -4 -10   45.51   47.27
   4  -4  10   30.25   27.24
   4   4  11   17.21   10.14
  -4   4 -11  -30.68   51.14
  -4  -4 -11   97.04   54.14
   4  -4  11   25.99    9.16
   4   6 -11   30.13   25.43
   4  -6 -11  -16.00   33.45
  -4  -6  11   29.23   21.44
   4   6 -10  111.97   41.30
   4  -6 -10   80.09   39.17
  -4  -6  10   94.58   33.05
   4   6  -9  -22.58   20.76
  -4   6   9   59.11   18.03
   4  -6  -9   47.96   28.43
  -4  -6   9   20.30    9.55
  -4  -6   9   -2.99   19.60
   4   6  -8  258.00   74.37
  -4   6   8  220.60   67.65
  -4   6   8  423.59   71.05
   4  -6  -8  365.17  105.94
  -4  -6   8  304.91   46.57
  -4  -6   8  573.26   78.32
  -4   6   7   19.94    9.90
   4   6  -7   57.41   20.06
  -4   6   7   81.63   28.95
  -4  -6   7   24.96   18.58
   4  -6  -7   68.79   42.42
  -4  -6   7   37.90   20.27
   4   6  -6  787.93   97.14
  -4   6   6  881.60   99.72
  -4   6   6  829.88  149.61
  -4   6   6  797.57   75.16
  -4  -6   6  851.55   85.30
  -4  -6   6  992.14   83.92
  -4   6   5  686.98  133.66
  -4   6   5  934.46  156.73
  -4   6   5  728.55   41.17
  -4  -6   5  768.11   34.49
  -4  -6   5  925.75   86.14
  -4  -6   5  781.87   42.68
  -4   6   4 1127.08   70.54
   4   6  -4 1356.90  106.58
  -4   6   4 1261.55   61.56
  -4   6   4 1039.98   50.88
  -4  -6   4 1184.16   51.42
   4  -6  -4 1287.66   78.41
  -4  -6   4  993.68   76.43
  -4  -6   4 1027.48   48.85
  -4   6   3  721.60  128.10
  -4   6   3  743.93   37.12
   4   6  -3  801.88  144.93
  -4   6   3 1024.51   46.88
  -4  -6   3  776.02   31.20
  -4  -6   3  816.99   39.30
  -4  -6   3  671.86  110.65
   4  -6  -3  809.58   51.78
   4   6  -2 1506.30   92.61
   4   6  -2 1457.40   43.91
  -4   6   2 1336.18   47.61
  -4   6   2 1495.08   48.62
  -4  -6   2 1577.75   49.99
  -4  -6   2 1579.21   84.47
   4  -6  -2 1234.77   46.55
   4  -6  -2 1677.98   56.79
  -4   6   1  403.36   29.00
   4   6  -1  404.88   27.36
  -4   6   1  402.07   29.62
   4   6  -1  437.58  104.34
  -4  -6   1  377.16   48.32
  -4  -6   1  426.45   45.68
   4  -6  -1  477.89   38.59
   4  -6  -1  383.68   36.29
   4   6   0  810.82  131.67
   4   6   0  707.61   49.26
  -4   6   0  532.20   42.66
  -4   6   0  604.30   39.91
  -4  -6   0  619.04   50.44
  -4  -6   0  630.77   46.31
   4  -6   0  592.35   41.88
   4  -6   0  668.72   44.31
  -4   6  -1  444.16   55.64
   4   6   1  389.91   38.68
  -4   6  -1  443.84   57.46
   4   6   1  431.54   90.97
  -4  -6  -1  353.07   40.50
  -4  -6  -1  472.35   39.85
   4  -6   1  386.77   30.99
   4  -6   1  232.07   19.16
   4   6   2  503.87   60.54
   4   6   2  258.83   81.91
  -4   6  -2  293.38   24.73
  -4   6  -2  278.15   64.93
  -4  -6  -2  311.24   46.24
  -4  -6  -2  401.96   38.61
   4  -6   2  443.71   29.39
   4  -6   2  373.82   80.50
   4   6   3 3363.98  151.12
   4   6   3 2288.42  112.25
  -4   6  -3 2840.53  142.19
  -4   6  -3 2647.68  120.36
  -4  -6  -3 2703.01  138.36
   4  -6   3 2462.79  115.88
  -4  -6  -3 2536.81  111.40
   4  -6   3 2400.22  109.12
   4   6   4  115.92   17.06
  -4   6  -4   93.04   34.57
   4   6   4   77.36   35.39
  -4   6  -4   69.93   17.13
  -4  -6  -4   60.08   37.40
   4  -6   4   92.26   18.95
  -4  -6  -4   91.78   10.75
   4  -6   4   55.92   15.37
  -4   6  -5   26.68   29.77
   4   6   5    8.64   11.30
  -4  -6  -5  135.94   46.42
   4  -6   5   38.92   12.31
  -4  -6  -5    3.99   10.59
   4  -6   5   11.64   19.67
   4   6   6  187.51   45.67
  -4   6  -6  258.53   55.16
  -4  -6  -6  169.28   47.23
   4  -6   6  152.16   31.26
  -4  -6  -6  133.23   22.46
   4   6   7  284.20   40.03
  -4   6  -7  308.87   91.66
  -4  -6  -7  172.16   52.97
   4  -6   7  345.30   52.87
   4   6   8   65.83   15.60
  -4   6  -8   88.53   45.99
  -4  -6  -8  232.61   76.86
   4  -6   8   42.26   15.48
   4   6   9   14.24    9.98
  -4   6  -9  -31.02   37.71
  -4  -6  -9  109.89   55.03
   4  -6   9    8.17   15.79
   4   6  10  246.13   29.83
  -4   6 -10  103.95   73.58
  -4  -6 -10  288.28   82.49
   4  -6  10  227.87   46.80
  -4   6 -11  -25.08   49.54
   4   6  11   30.49   14.43
   4  -6  11   44.41   22.08
   4  -8 -12   30.34   40.27
  -4  -8  11    6.76   20.29
   4   8 -10   34.62   25.76
   4  -8 -10  -27.28   35.22
  -4  -8  10   31.01   15.17
  -4   8   9   32.83   11.50
   4  -8  -9    2.07   35.39
  -4  -8   9   45.55   13.58
   4  -8  -8  146.75   47.33
  -4  -8   8   74.36   45.05
  -4  -8   8  113.79   31.91
   4   8  -7 1332.38  112.49
  -4   8   7 1337.18   94.01
  -4   8   7 1104.94   69.34
   4  -8  -7 1653.75  130.77
  -4  -8   7 1267.01   92.58
  -4  -8   7 1356.50  123.64
   4   8  -6   76.42   23.05
  -4   8   6   77.09   30.67
  -4   8   6   56.87   21.98
  -4   8   6   80.03   16.06
  -4   8   6  103.18   13.96
  -4  -8   6   53.54   12.41
  -4   8   5 1753.17  120.44
  -4   8   5 1586.86   92.42
  -4   8   5 2057.41  121.32
  -4  -8   5 1868.18  104.22
  -4  -8   5 2177.36  165.78
  -4  -8   5 1999.26  113.67
  -4   8   4  179.41   29.21
  -4   8   4  169.44   22.63
   4   8  -4  199.25   57.21
  -4   8   4  132.70   35.47
  -4  -8   4  138.45   14.42
  -4  -8   4  140.44   25.51
   4  -8  -4  195.24   41.35
  -4  -8   4   67.00   43.33
  -4   8   3  654.45   71.64
  -4   8   3  646.80   37.20
   4   8  -3  661.78  150.25
  -4   8   3  694.06   35.41
  -4  -8   3  531.57   60.34
   4  -8  -3  671.95   42.94
   4   8  -2  574.76   70.45
  -4   8   2  459.33   48.44
   4   8  -2  421.33   16.95
  -4   8   2  439.09   22.57
  -4  -8   2  457.55   21.21
  -4  -8   2  506.51   46.07
   4  -8  -2  470.71   66.02
   4  -8  -2  407.83   25.85
  -4   8   113183.78  379.91
   4   8  -115412.30  436.62
  -4   8   113122.76  374.39
   4   8  -111775.57  367.88
  -4  -8   113160.58  376.60
  -4  -8   114545.86  438.28
   4  -8  -113476.01  382.98
   4  -8  -112938.29  369.73
   4   8   0  101.08   43.45
   4   8   0   74.06   14.29
  -4   8   0   65.25   17.08
  -4   8   0   81.74   10.21
   4  -8   0   91.52   12.97
  -4  -8   0  107.01   22.78
   4  -8   0   62.19   13.85
  -4  -8   0   67.13   15.99
   4   8   1   95.65   35.56
   4   8   1   85.30   27.78
  -4   8  -1   62.28   19.74
  -4   8  -1   64.66   12.52
  -4  -8  -1   78.26   38.70
   4  -8   1   36.44   10.12
   4  -8   1   66.60   12.94
   4   8   2  223.90   45.20
  -4   8  -2  161.99   16.41
  -4   8  -2  131.38   33.12
   4   8   2  199.53   35.37
  -4  -8  -2  187.31   38.66
  -4  -8  -2  157.16   15.38
   4  -8   2  141.71   17.99
   4  -8   2  168.12   34.30
   4   8   3 3917.98  180.13
   4   8   3 3551.16  167.83
  -4   8  -3 3895.07  184.49
   4  -8   3 3846.84  168.55
  -4  -8  -3 3406.69  171.24
  -4  -8  -3 3560.36  153.01
   4  -8   3 3301.85  145.90
   4   8   4  536.04   91.51
   4   8   4  465.79   87.11
  -4   8  -4  405.68   43.36
  -4   8  -4  402.16   29.51
  -4  -8  -4  393.26   75.13
   4  -8   4  427.97   32.12
  -4  -8  -4  451.51   65.96
   4  -8   4  328.12   62.12
  -4   8  -5 1386.71   76.21
   4   8   5 1459.38   77.61
  -4  -8  -5 1689.76  101.94
   4  -8   5 1356.58  118.23
   4  -8   5 1567.95   75.75
  -4  -8  -5 1694.16  102.08
   4   8   6   37.74   12.55
  -4   8  -6    8.70   18.54
  -4  -8  -6  -51.88   42.12
   4  -8   6   11.96   10.58
   4   8   7  724.68  101.40
  -4   8  -7  704.70   77.50
  -4  -8  -7  647.27  103.34
   4  -8   7  783.89   71.34
  -4  -8  -7  634.12   75.70
   4   8   8   60.37   15.84
  -4   8  -8   58.59   46.62
  -4  -8  -8   66.39   49.37
   4  -8   8   25.63    6.69
  -4   8  -9   60.06   46.26
  -4  -8  -9  385.80   91.78
   4  -8   9  158.02   46.74
  -4   8 -10   72.59   51.96
   4  -8  10   20.31   20.87
  -4   8 -11   44.46   51.53
  -4  -8 -11   33.81   58.41
   4  -8  11   54.23   13.17
   4 -10 -11   21.61   41.22
  -4 -10  11   59.82   36.50
   4  10 -10   25.43   19.43
   4 -10 -10   20.72   38.26
  -4 -10  10   24.64   20.57
  -4  10   9   26.09    9.48
   4  10  -9   38.02   22.42
   4 -10  -9   81.94   41.94
  -4 -10   9   36.96   14.28
   4  10  -8   30.36   13.10
  -4  10   8    7.20    7.47
   4 -10  -8  -17.80   34.37
  -4 -10   8   23.04   15.99
  -4 -10   8   47.96   23.83
   4  10  -7  604.50   97.55
  -4  10   7  717.56   36.94
  -4  10   7  448.59   87.28
  -4  10   7  685.41   20.08
  -4 -10   7  870.29  139.20
   4  10  -6 1171.29   85.04
  -4  10   6 1143.71   71.76
  -4  10   6 1404.05   91.12
  -4  10   6 1311.85   80.32
  -4 -10   6 1571.64  107.99
  -4  10   5 2702.02  175.39
  -4  10   5 3607.71  200.96
  -4  10   5 2681.40  155.97
  -4 -10   5 2810.49  154.49
  -4 -10   5 2634.18  228.43
  -4 -10   5 2421.83  133.73
  -4  10   4   72.64   28.99
  -4  10   4   66.96   22.78
  -4  10   4   73.10   12.14
   4 -10  -4  107.19   23.04
  -4 -10   4  104.94   45.21
  -4  10   3 4469.39  237.98
  -4  10   3 4451.49  190.66
   4  10  -3 4330.28  221.34
  -4  10   3 4738.05  197.27
   4 -10  -3 5140.80  222.76
  -4 -10   3 3773.85  188.53
   4  10  -2   35.81    4.43
  -4  10   2   74.39   16.43
  -4  10   2   29.10   11.86
   4  10  -2  130.96   78.19
  -4 -10   2   80.77   30.80
   4 -10  -2   28.27   10.68
   4 -10  -2   35.53    6.11
   4  10  -1   72.99   26.07
   4  10  -1   56.23   11.16
  -4  10   1   68.89   17.93
  -4  10   1   58.54    9.64
  -4 -10   1   36.29   12.83
  -4 -10   1   94.80   30.48
   4 -10  -1   64.86   12.48
   4 -10  -1   58.86    9.16
   4  10   0  417.72   46.99
   4  10   0  606.70  105.32
  -4  10   0  477.43   28.87
  -4  10   0  540.09   28.86
  -4 -10   0  528.83   37.62
  -4 -10   0  439.38   64.18
   4 -10   0  524.31   28.71
   4 -10   0  509.27   44.94
   4  10   119442.55  577.68
   4  10   118580.83  539.17
  -4  10  -120501.18  595.20
  -4  10  -117935.48  510.88
  -4 -10  -118115.70  528.82
  -4 -10  -119359.24  560.30
   4 -10   117792.24  510.06
   4 -10   118616.57  528.14
   4  10   2  263.83   54.77
   4  10   2  333.38   35.87
  -4  10  -2  357.60   67.51
  -4  10  -2  339.24   30.14
   4 -10   2  300.21   62.16
   4 -10   2  247.38   24.65
  -4 -10  -2  426.14   53.12
   4  10   3 2144.22  108.11
   4  10   3 2507.48  121.57
  -4  10  -3 3210.09  148.27
  -4  10  -3 2511.86  110.64
  -4 -10  -3 2633.79  133.19
  -4 -10  -3 2590.36  107.06
   4 -10   3 2728.30  117.86
   4 -10   3 2848.45  121.26
   4  10   4 3935.47  228.47
   4  10   4 3974.94  241.23
  -4  10  -4 3724.24  226.84
  -4  10  -4 3464.27  199.78
  -4 -10  -4 3720.51  235.86
   4 -10   4 3496.53  206.36
  -4 -10  -4 3529.88  198.49
   4 -10   4 3926.59  229.62
   4  10   5  118.05   31.18
  -4  10  -5  110.54   35.37
  -4 -10  -5   91.34   57.80
  -4 -10  -5  119.26   20.62
   4 -10   5   96.73   25.02
   4  10   6  155.39   42.51
  -4  10  -6  276.70   64.07
  -4 -10  -6  190.29   67.10
   4 -10   6  242.65   47.17
  -4 -10  -6  216.26   44.79
   4  10   7  674.72   83.04
  -4  10  -7 1064.18  112.39
  -4 -10  -7  653.33  223.08
   4 -10   7 1064.79   97.04
  -4 -10  -7  851.47   70.62
   4  10   8   52.12   19.41
  -4  10  -8   31.43   39.88
  -4 -10  -8   18.56   50.44
   4 -10   8   49.41   14.78
   4  10   9   57.84   26.08
  -4  10  -9  115.91   48.33
  -4 -10  -9  139.28   65.47
   4 -10   9  177.79   35.90
  -4  10 -10  160.58   51.43
  -4 -10 -10   93.05   49.95
   4 -10  10  102.17   28.07
  -4  10 -11   61.82   50.32
  -4 -10 -11  121.74   61.00
   4 -10  11   90.96   31.78
  -4  12  11   14.03   18.82
  -4 -12  11   68.91   30.31
  -4 -12  10   98.67   56.44
   4  12  -9   34.59   17.72
  -4  12   9   18.92    8.15
  -4 -12   9   68.23   27.79
   4  12  -8   67.16   18.47
  -4  12   8   33.03    7.42
  -4  12   8   86.08   20.13
  -4 -12   8   26.89   12.71
  -4 -12   8  108.80   25.42
   4  12  -7 1440.12  130.47
  -4  12   7 1557.98  205.09
  -4 -12   7 1239.90  110.36
  -4 -12   7 1549.40  148.45
   4  12  -6   24.61    9.13
  -4  12   6   25.04    6.56
  -4  12   6   38.06   18.45
  -4  12   6   34.99    8.89
  -4 -12   6   33.84    6.50
  -4 -12   6   37.33   20.26
  -4  12   5   54.90   21.05
  -4  12   5   12.96    5.27
  -4  12   4   51.34   29.08
  -4  12   4    9.57   16.09
  -4  12   4   39.74    9.68
   4 -12  -4   65.28   29.48
  -4 -12   4  150.77   30.34
  -4  12   3  347.35   73.60
  -4  12   3  421.91   57.46
   4  12  -3  347.62   58.47
  -4 -12   3  362.16   55.12
   4 -12  -3  313.88   41.96
   4  12  -2 2618.80  108.46
  -4  12   2 3091.80  139.40
  -4  12   2 3238.73  137.05
   4  12  -2 3228.84  175.28
  -4 -12   2 3110.15  159.97
   4 -12  -2 3046.25  129.68
   4 -12  -2 3198.25  139.37
   4  12  -1  125.93   54.09
   4  12  -1  112.33   17.85
  -4  12   1   33.88   12.43
  -4  12   1   99.04   14.18
  -4 -12   1  106.15   26.47
  -4 -12   1   35.12   32.44
   4 -12  -1   96.55   15.45
   4 -12  -1   67.55   15.30
  -4  12   0  606.93   48.14
   4  12   0  672.03   68.87
  -4  12   0  670.22   49.69
   4  12   0  538.54   58.19
  -4 -12   0  598.99   49.98
  -4 -12   0  786.34  139.15
   4 -12   0  586.63   44.10
   4 -12   0  575.12   42.48
   4  12   1  254.16   49.86
   4  12   1  182.77   30.20
  -4  12  -1  320.77   73.47
  -4  12  -1  278.75   27.41
  -4 -12  -1  231.82   41.52
  -4 -12  -1  264.81   41.77
   4 -12   1  264.07   26.09
   4 -12   1  277.78   41.66
   4  12   2  459.87  119.58
   4  12   2  243.90   33.05
  -4  12  -2  266.25   31.01
  -4  12  -2  362.50   56.49
  -4 -12  -2  432.12   53.33
  -4 -12  -2  529.13   49.80
   4 -12   2  376.83   85.31
   4 -12   2  333.08   48.60
  -4  12  -3  382.96   29.31
  -4  12  -3  365.77   28.23
   4  12   3  371.76   30.17
  -4 -12  -3  514.75   55.94
  -4 -12  -3  576.65   43.82
   4 -12   3  511.34  111.02
   4 -12   3  407.36   23.85
  -4  12  -4   42.72   26.76
   4  12   4   49.90   18.07
  -4 -12  -4   44.07   35.97
   4 -12   4   89.94   24.62
   4 -12   4   38.62   20.39
   4  12   5 1316.84   88.91
  -4  12  -5 1325.09  103.32
  -4 -12  -5 1709.89  167.08
   4 -12   5 1470.86   98.02
   4  12   6  101.66   21.33
  -4  12  -6   91.76   30.53
  -4 -12  -6  247.80   58.52
   4 -12   6   87.63   22.93
  -4 -12  -6   71.74   15.34
   4  12   7  166.76   27.36
  -4  12  -7  219.67   58.96
  -4 -12  -7  119.25   85.64
   4 -12   7   96.68   20.95
   4  12   8  161.23   47.27
  -4  12  -8  227.11   55.82
  -4 -12  -8  217.62   58.96
   4 -12   8  242.73   44.06
   4  12   9  345.92   64.88
  -4  12  -9  308.71   55.90
  -4 -12  -9  314.14   74.07
   4 -12   9  282.24   36.03
  -4  12 -10   33.47   41.98
  -4 -12 -10  104.22   60.17
   4 -12  10   17.73   20.52
  -4  14  11  277.59   99.94
  -4 -14  11  345.23   85.66
  -4  14  10   23.89   21.53
  -4 -14  10   18.81   26.00
  -4  14   9  152.50   27.79
  -4 -14   9  180.89   47.33
   4  14  -8    6.71   10.99
  -4  14   8   73.56   20.36
  -4 -14   8   28.66    8.58
  -4 -14   8   49.87   26.15
   4  14  -7 1746.46  135.01
  -4  14   7 1998.10  177.71
  -4 -14   7 1736.51  126.99
  -4 -14   7 2269.67  285.43
  -4  14   6 3403.32  219.57
  -4 -14   6 3261.00  188.00
  -4 -14   6 3175.97  183.01
  -4 -14   6 3386.55  212.65
  -4  14   5 9266.95  102.81
  -4  14   4  201.68   20.72
  -4  14   4  170.46    8.24
   4 -14  -4  145.23   25.84
  -4  14   3 1634.04  261.35
  -4  14   3 1917.77   85.46
  -4 -14   3 1534.93  102.85
   4 -14  -3 1660.55   73.52
   4  14  -2 3592.75  141.26
   4  14  -2 3645.44  141.07
  -4  14   2 3868.20  157.90
   4  14  -2 3885.77  199.04
  -4  14   2 4109.07  163.06
   4 -14  -2 3867.27  153.44
   4  14  -1  520.04  118.61
   4  14  -1  444.06   36.42
  -4  14   1  460.89   57.62
  -4  14   1  488.28   36.96
  -4 -14   1  511.44   51.84
  -4 -14   1  368.37   46.35
   4 -14  -1  429.92   33.20
   4 -14  -1  435.80   36.56
   4  14   0  167.65   61.06
   4  14   0   23.16   19.00
  -4  14   0   39.66   15.69
  -4  14   0   53.34   14.59
  -4 -14   0   52.06   22.90
  -4 -14   0   72.94   31.84
   4 -14   0   26.00   13.29
   4 -14   0   12.66   11.50
   4  14   1 9686.57  400.60
   4  14   111112.03  443.48
  -4  14  -110320.59  404.33
  -4  14  -111435.48   96.07
  -4 -14  -110895.81  438.20
  -4 -14  -110401.40  411.45
   4 -14   111436.00   95.49
   4 -14   111073.43  431.68
   4  14   2  301.92   41.37
   4  14   2  278.24   35.94
  -4  14  -2  339.06   80.02
  -4  14  -2  242.74   51.52
  -4 -14  -2  222.63   42.19
  -4 -14  -2  342.58   35.30
   4 -14   2  327.34   27.18
   4 -14   2  257.08   51.45
   4  14   3 3467.84  215.27
   4  14   3 2812.36  240.85
  -4  14  -3 2678.57  160.72
  -4  14  -3 2784.44  161.72
  -4 -14  -3 2656.47  168.86
  -4 -14  -3 2955.46  166.88
   4 -14   3 2970.42  172.79
   4 -14   3 3099.55  176.19
  -4  14  -4 2955.72  168.86
  -4 -14  -4 2816.40  135.58
   4 -14   4 2726.13   99.97
  -4 -14  -4 2792.35   98.82
   4 -14   4 2830.21  111.01
  -4  14  -5   71.95   28.70
  -4 -14  -5   39.05   45.67
   4 -14   5   26.74   28.70
   4  14   6   11.19   13.46
  -4  14  -6   17.66   26.06
  -4 -14  -6  485.88   90.81
   4 -14   6   32.47   19.34
  -4  14  -7  530.26   79.08
  -4 -14  -7  372.33   82.10
   4 -14   7  486.88   78.91
   4  14   8   15.45   29.32
  -4  14  -8   67.88   38.67
  -4 -14  -8  -18.59   44.00
   4 -14   8   17.63   12.32
  -4  14  -9   66.47   56.16
  -4 -14  -9   62.67   55.82
   4 -14   9   18.64   23.98
  -4  14 -10   76.16   46.18
  -4 -14 -10  147.96   78.04
   4 -14  10   29.99   22.20
  -4  16  11   54.99   25.62
  -4 -16  11   29.57   29.01
  -4  16  10  416.21   36.90
  -4 -16  10  277.81   57.58
  -4  16   9   33.58   20.97
  -4 -16   9   30.88   31.78
   4  16  -8   33.12    7.18
  -4  16   8   37.72   19.09
  -4 -16   8   56.78   25.48
  -4  16   7  725.93   74.93
  -4 -16   7  716.59   81.59
  -4  16   6  604.46  103.72
  -4 -16   6  607.16   91.62
  -4  16   5   23.67   20.36
  -4  16   4 3660.42  132.95
  -4  16   4 3348.44  108.99
  -4  16   3  235.15   48.40
  -4  16   3  176.86   23.68
   4 -16  -3  171.97   16.19
  -4 -16   3  200.50   42.11
   4  16  -2 2171.90  123.37
   4  16  -2 2014.62  111.87
  -4  16   2 1909.13  112.24
  -4  16   2 2157.42  122.16
   4  16  -2 2451.24  192.10
  -4 -16   2 1722.56  124.60
   4 -16  -2 2192.78  124.74
   4 -16  -2 2137.37  124.54
   4  16  -1 5305.71  393.98
   4  16  -1 4708.23  191.95
  -4  16   1 4597.56  188.71
  -4  16   1 4604.69  184.81
  -4 -16   1 4584.45  189.97
  -4 -16   1 4416.86  203.52
   4 -16  -1 4143.78  165.52
   4 -16  -1 4686.76  190.17
   4  16   0   46.48   51.72
   4  16   0  128.53   21.53
  -4  16   0  148.64   25.48
  -4  16   0   70.16   14.60
  -4 -16   0   87.17   29.66
  -4 -16   0   92.58   30.36
   4 -16   0   83.76   18.06
   4 -16   0   94.87   14.73
   4  16   1 1510.04  252.40
   4  16   1 1374.15   81.09
  -4  16  -1 1133.07   53.50
  -4  16  -1 1319.18   63.21
  -4 -16  -1 1147.62   94.11
  -4 -16  -1 1085.91   57.42
   4 -16   1 1308.68   63.25
   4 -16   1 1356.17   63.51
  -4  16  -2 1431.82   92.10
   4  16   2 1034.62   75.71
  -4  16  -2 1077.76   69.47
   4 -16   2 1293.76   78.83
  -4 -16  -2 1162.84   88.34
   4 -16   2 1182.05   93.11
  -4 -16  -2 1487.76  104.12
   4  16   3  493.50   62.36
   4  16   3  381.40   50.78
  -4  16  -3  355.91   59.88
   4 -16   3  351.20   61.61
  -4 -16  -3  484.74   66.32
  -4 -16  -3  404.11   41.40
   4 -16   3  410.13   93.51
   4  16   4  561.46  124.32
  -4  16  -4  481.15  111.07
  -4 -16  -4  605.05   85.33
  -4 -16  -4  465.94   64.12
   4 -16   4  578.37  108.79
   4  16   5 1208.59  223.02
  -4  16  -5 1097.88  115.63
  -4 -16  -5 1286.73  140.00
   4 -16   5 1144.22  138.86
  -4 -16  -5  767.26   70.38
   4  16   6  563.33  103.15
  -4  16  -6  730.84  197.61
  -4 -16  -6  669.35  116.11
  -4 -16  -6  725.90   58.87
   4 -16   6  817.42  173.77
   4  16   7   33.68   14.90
  -4  16  -7  -25.22   34.58
  -4 -16  -7  141.67   68.31
   4 -16   7   35.39   19.48
  -4  16  -8  162.23   44.99
  -4 -16  -8  284.81   74.32
   4 -16   8  282.96   79.12
  -4  16  -9   54.94   40.71
  -4 -16  -9  -17.97   52.82
   4 -16   9   29.68   15.97
  -4  16 -10   20.40   44.50
  -4 -16 -10   99.10   59.97
   4 -16  10   18.53   21.56
  -4  18  11  -13.01   22.20
  -4 -18  11   19.95   26.74
  -4  18  10  -22.51   20.50
  -4 -18  10   -2.79   26.30
  -4  18   9   77.57   31.23
  -4 -18   9   65.28   30.91
  -4  18   8   42.29   15.06
  -4 -18   8   24.35   24.00
  -4  18   7   38.07   20.25
  -4 -18   7   75.96   29.64
  -4  18   6 1063.65   89.93
  -4 -18   6  850.01   82.77
  -4  18   5 1682.81  108.69
  -4  18   4   19.87    9.56
  -4  18   3  633.57   76.82
  -4  18   3  616.81   57.18
   4 -18  -3  760.63   70.98
   4  18  -2  414.46   61.81
  -4  18   2  393.35   70.15
   4  18  -2  245.20   26.77
  -4  18   2  263.72   28.58
   4 -18  -2  329.97   33.20
  -4 -18   2  176.31   36.25
   4  18  -1   21.99   12.63
  -4  18   1   14.36   13.89
   4  18  -1    1.31   44.13
   4  18  -1    6.53    6.96
  -4  18   1   30.74   16.55
   4 -18  -1   28.35   18.66
   4 -18  -1    2.17    8.59
  -4 -18   1   25.35   23.78
   4  18   0  117.68   49.24
   4  18   0  138.27   18.85
  -4  18   0  192.24   33.59
  -4  18   0  170.92   18.31
  -4 -18   0  184.50   52.45
  -4 -18   0  181.24   37.66
   4 -18   0  119.37   28.11
   4 -18   0  207.77   16.86
   4  18   1  595.47  115.63
   4  18   1  487.34   58.82
  -4  18  -1  509.61   51.37
  -4  18  -1  521.35  107.20
  -4 -18  -1  617.86   71.43
  -4 -18  -1  435.11   58.53
   4 -18   1  629.03   63.02
   4 -18   1  506.17   50.18
   4  18   2   35.74   31.04
   4  18   2   38.02   24.95
  -4  18  -2   -0.11   18.30
  -4  18  -2   49.65   17.99
  -4 -18  -2    7.51   26.16
  -4 -18  -2   16.56    7.46
   4 -18   2   20.43    9.23
   4 -18   2   16.08   10.49
   4  18   3   89.75   32.67
  -4  18  -3   16.55   18.62
  -4 -18  -3   70.93   31.50
   4 -18   3   48.88   26.88
   4  18   4  815.29   76.89
  -4  18  -4  786.47  103.69
  -4 -18  -4  891.82  172.59
  -4 -18  -4  887.12   56.95
   4 -18   4  848.57   61.87
   4  18   5 1135.50  178.87
  -4  18  -5 1256.45  111.66
  -4 -18  -5 1136.56  287.47
   4 -18   5 1059.26  104.92
   4  18   6  108.07   32.21
  -4  18  -6   51.59   33.16
  -4 -18  -6  112.49   48.20
  -4 -18  -6    7.53    3.31
   4 -18   6   24.66   21.63
   4  18   7  387.19   69.21
  -4  18  -7  238.98   46.34
  -4 -18  -7  324.85   76.29
   4 -18   7  337.50   83.96
  -4  18  -8  194.36   56.88
  -4 -18  -8  203.71   73.98
   4 -18   8  134.84   34.44
  -4  18  -9   91.04   46.14
  -4 -18  -9   43.07   52.42
   4 -18   9  -16.13   26.86
  -4  18 -10  277.73   88.69
  -4 -18 -10  374.74   97.44
   4 -18  10  108.91   45.13
  -4  20  10   30.71   20.01
  -4 -20  10    2.58   16.97
  -4  20   9   32.90   23.85
  -4  20   8   72.33   23.18
  -4 -20   8   66.98   26.57
  -4  20   7  483.74   37.29
  -4 -20   7  375.46   37.81
  -4  20   6  296.39   60.50
  -4 -20   6  238.81   69.14
  -4  20   5  317.34   56.21
  -4 -20   5  228.21   51.60
  -4  20   4  929.94  118.35
   4  20  -3 1369.88   83.76
   4  20  -3 1348.19   80.28
  -4  20   3 1451.26   95.11
   4 -20  -3 1795.42  112.36
   4  20  -2  157.68   28.19
   4  20  -2  185.35   32.26
  -4  20   2  187.69   58.80
  -4  20   2  164.32   44.12
   4 -20  -2  141.07   31.80
   4  20  -1 1284.11   58.18
  -4  20   1 1474.32   61.69
   4  20  -1 1500.41   56.35
   4  20  -1 1609.00  116.42
  -4  20   1 1430.55   57.13
   4 -20  -1 1268.53   62.19
  -4 -20   1  964.48  200.91
  -4  20   0  570.02   58.37
   4  20   0  461.67   59.53
   4  20   0  529.29  168.95
  -4 -20   0  515.66   73.85
   4 -20   0  543.27   53.94
  -4  20  -1  706.87  109.64
   4  20   1  620.96   69.54
  -4  20  -1  649.94   67.08
   4  20   1  622.71  219.73
  -4 -20  -1  647.97  133.03
   4 -20   1  667.48  123.09
  -4 -20  -1  433.97   56.08
  -4  20  -2 2146.67  138.35
   4  20   2 1742.43  124.74
   4  20   2 2156.00  163.53
  -4 -20  -2 1901.73  136.75
  -4 -20  -2 1959.54  181.92
   4 -20   2 1838.56  123.23
  -4  20  -3 1067.10   76.28
  -4 -20  -3  624.56   57.21
   4 -20   3  659.85   45.02
   4  20   4  -14.94   20.54
  -4  20  -4   11.95   18.74
  -4 -20  -4    3.32   38.05
  -4 -20  -4    2.28    6.97
   4 -20   4   -5.23   20.58
   4  20   5  396.62   96.21
  -4  20  -5  507.52   67.90
  -4 -20  -5  513.14   81.88
  -4 -20  -5  317.58   54.80
   4 -20   5  453.68  122.88
   4  20   6  272.15   83.58
  -4  20  -6  433.69   61.77
  -4 -20  -6  438.99   74.00
   4 -20   6  353.06   86.81
  -4  20  -7   45.52   31.15
  -4 -20  -7  155.75   66.18
   4 -20   7   45.04   23.37
  -4  20  -8  134.74   52.40
  -4 -20  -8  137.11   58.07
   4 -20   8  181.68   28.75
  -4  20  -9   17.06   38.13
  -4 -20  -9   68.38   55.08
   4 -20   9   61.89   13.88
  -4  22  10   28.43   30.63
  -4 -22  10    4.88   27.89
  -4  22   9   35.79   16.84
  -4 -22   9   21.65   30.26
  -4  22   8  433.72   46.19
  -4 -22   8  271.95   83.41
  -4  22   7  145.31   22.33
  -4 -22   7  245.87   41.52
  -4  22   6  558.94   69.26
  -4 -22   6  503.28  140.22
  -4  22   5   37.60   24.93
  -4 -22   5   74.05   35.47
  -4  22   4  212.62   36.32
   4  22  -3   68.13   12.73
   4  22  -3   43.62   11.96
  -4  22   3   59.37   13.59
   4 -22  -3   37.03   10.82
   4  22  -2 4057.04  242.29
   4  22  -2 4293.34  251.09
  -4  22   2 4217.01  256.44
   4 -22  -2 3798.74  222.66
   4  22  -1 1840.09  119.35
  -4  22   1 1774.22  114.44
   4  22  -1 1758.88  105.91
  -4  22   1 1547.53   95.98
   4 -22  -1 1671.74  103.26
   4  22   0  250.48   41.94
  -4  22   0  249.09   57.08
   4  22   0  274.64   53.00
   4  22   0  153.82   46.39
   4 -22   0  224.26   29.94
  -4  22  -1  622.95  116.50
   4  22   1  444.85   58.21
  -4  22  -1  496.90   56.88
   4  22   1  514.70  153.45
  -4 -22  -1  472.60  141.92
   4 -22   1  669.53  105.63
  -4 -22  -1  332.82   69.21
   4  22   2  359.63   92.63
  -4  22  -2  477.39  103.23
  -4 -22  -2  289.90   78.97
  -4 -22  -2  318.51   82.29
   4 -22   2  358.86   89.13
   4  22   3  534.31   90.51
  -4  22  -3  768.81   77.84
  -4 -22  -3  825.10  102.59
   4 -22   3  643.44  124.96
   4  22   4 2345.27  194.59
  -4  22  -4 1656.80  132.15
  -4 -22  -4 2366.04  204.25
  -4 -22  -4 2038.30  152.23
   4 -22   4 2401.00  185.18
   4  22   5   56.91   34.03
  -4  22  -5   53.13   38.81
  -4 -22  -5  152.83   60.34
   4 -22   5   94.05   26.38
  -4 -22  -5   64.62   17.39
  -4  22  -6   95.27   34.12
  -4 -22  -6  127.14   63.02
   4 -22   6  108.68   23.26
  -4  22  -7  278.36   47.43
  -4 -22  -7  208.49   61.55
   4 -22   7   89.24   69.79
  -4  22  -8    1.14   40.53
  -4 -22  -8   23.21   41.31
  -4  22  -9   40.31   35.67
  -4 -22  -9   98.57   60.30
   4 -22   9   57.00   22.35
  -4  24   9   42.29   25.54
  -4 -24   9   77.10   31.84
  -4  24   8   50.82   23.79
  -4 -24   8    6.65   29.69
  -4  24   7  300.48   45.01
  -4 -24   7  350.95   47.53
  -4  24   6   -9.26   19.22
  -4 -24   6   74.25   22.54
  -4  24   5   26.78   16.91
  -4 -24   5   82.13   30.66
  -4  24   4   40.23   19.04
  -4 -24   4   74.35   33.59
   4  24  -3   77.33   20.09
   4  24  -3   66.15   19.95
  -4  24   3   74.59   22.98
   4 -24  -3   61.60   18.23
   4 -24  -3   77.04   19.37
   4  24  -2  112.58   22.43
   4  24  -2   96.81   16.40
  -4  24   2  170.50   31.31
   4 -24  -2  103.72   23.16
   4  24  -1 1156.67  110.79
  -4  24   1 1371.60  126.68
   4  24  -1 1429.64  127.41
   4 -24  -1 1350.35  122.34
   4  24   0  247.39   44.56
  -4  24   0  308.99   65.02
   4  24   0  270.86   67.05
  -4  24   0  254.11   40.52
   4 -24   0  314.64   76.31
  -4  24  -1 2348.48  211.49
   4  24   1 2165.48  202.15
   4  24   1 2616.94  256.18
  -4 -24  -1 2732.96  253.69
  -4 -24  -1 1648.54  153.10
   4 -24   1 2345.50  210.18
   4  24   2   54.05   31.89
  -4  24  -2   79.38   33.16
  -4 -24  -2   55.33   24.51
   4 -24   2   34.94   11.23
  -4  24  -3  317.87   84.67
   4  24   3  238.70   61.12
  -4 -24  -3  260.07   64.10
   4 -24   3  312.50   76.11
   4  24   4   66.95   26.72
  -4  24  -4   47.03   27.77
  -4 -24  -4  -18.73   36.09
  -4 -24  -4   -1.03    6.77
   4 -24   4   17.97    8.61
   4  24   5  479.22   75.46
  -4  24  -5  626.24  159.44
  -4 -24  -5  871.98   79.18
   4 -24   5  504.59   91.48
   4  24   6    7.58   26.09
  -4  24  -6    2.32   26.06
  -4 -24  -6   -8.56   48.25
   4 -24   6   30.05   24.22
  -4  24  -7   15.03   31.25
  -4 -24  -7   11.86   52.18
   4 -24   7   28.36   27.89
  -4  24  -8  233.07   66.74
  -4 -24  -8  114.69   56.23
  -4  24  -9   37.51   27.76
  -4 -24  -9   69.76   63.01
   4 -24   9   96.08   32.34
  -4  26   9   31.49   27.77
  -4 -26   9   24.10   29.90
  -4  26   8  236.51   64.94
  -4 -26   8  203.01   39.49
  -4  26   7   22.37   24.84
  -4 -26   7   18.47   32.94
  -4  26   6   62.08   26.18
  -4 -26   6   66.06   25.56
  -4  26   5 1273.34   54.54
  -4 -26   5 1109.90   59.28
  -4  26   4  112.51   20.77
  -4 -26   4  233.30   50.43
   4  26  -3  409.33   42.12
   4  26  -3  370.79   32.35
  -4  26   3  324.06  110.87
   4 -26  -3  270.28   60.12
   4 -26  -3  351.79   30.74
   4  26  -2  362.21   41.13
  -4  26   2  428.77   54.66
   4  26  -2  461.88   45.65
  -4  26   1  176.68   50.55
   4  26  -1  179.20   53.28
   4 -26  -1  124.02   33.18
   4  26   0   13.69   24.01
  -4  26   0   20.62   14.73
   4  26   0    9.88   11.77
   4 -26   0    6.29   10.70
  -4  26  -1  103.51   41.33
   4  26   1  184.99   38.81
   4 -26   1  185.94   45.91
  -4  26  -2   54.75   22.14
  -4 -26  -2   57.14   37.25
  -4 -26  -2   24.33   11.54
   4 -26   2   30.93   14.63
  -4  26  -3  501.17  127.28
  -4 -26  -3  339.36  145.34
  -4 -26  -3  407.87  132.35
   4 -26   3  372.90  129.87
   4  26   4  982.47   71.56
  -4  26  -4  926.00  153.07
  -4 -26  -4  787.33  234.58
   4 -26   4 1145.49   49.63
   4  26   5   70.60   32.10
  -4  26  -5  171.86   64.73
  -4 -26  -5   84.49   39.42
   4 -26   5  117.64   26.33
  -4 -26  -6  241.86   70.52
   4 -26   6  236.13   33.85
  -4  26  -7   76.67   31.32
  -4 -26  -7   99.37   51.14
   4 -26   7   83.33   24.24
  -4  26  -8   59.37   29.73
  -4 -26  -8    8.22   42.35
  -4  28   8   38.28   17.00
  -4 -28   8   29.19   30.37
  -4  28   7  110.14   29.94
  -4 -28   7  178.25   45.79
  -4  28   6  128.01   32.91
  -4 -28   6  180.85   36.01
  -4  28   5   60.87   16.74
  -4 -28   5   52.90   41.15
  -4  28   4  228.66   61.28
  -4 -28   4  171.60   91.10
   4  28  -3    0.02    3.61
  -4  28   3   -8.79   17.33
   4 -28  -3    6.27    4.93
  -4 -28   3   -6.89   25.61
  -4  28   2  160.24   41.62
   4 -28  -2  163.94   41.49
  -4  28   1    3.96    8.28
   4  28  -1   15.19    8.11
   4 -28  -1    2.58    9.77
   4  28   0   24.85   25.93
  -4  28   0   91.87   22.32
   4  28   0   41.26   14.17
   4 -28   0  106.99   19.54
  -4  28  -1  390.58   61.12
   4  28   1  416.94   51.31
   4 -28   1  443.27   84.28
  -4  28  -2  474.57   75.12
   4  28   2  429.93   54.23
   4 -28   2  475.75  123.84
  -4  28  -3   23.28   21.07
  -4 -28  -3   75.27   36.23
   4 -28   3   65.25   27.88
  -4  28  -4   15.31    9.73
  -4 -28  -4   44.10   30.44
   4 -28   4   14.40   10.31
  -4 -28  -5  136.42   48.04
   4 -28   5  189.90   79.38
  -4  28  -6  -11.39   29.47
  -4 -28  -6   40.45   31.06
   4 -28   6   48.76   22.80
  -4  28  -7   59.86   26.52
  -4 -28  -7    3.84   33.36
   4 -28   7   11.43   14.04
  -4  28  -8   23.80   33.81
  -4 -28  -8   48.64   43.58
  -4  30   8   -1.28   21.19
  -4 -30   8   20.35   35.77
  -4  30   7  210.43   75.07
  -4 -30   7  160.24   73.50
  -4  30   6   28.46   24.42
  -4 -30   6   74.68   31.75
  -4  30   5  728.93  168.31
  -4 -30   5  705.39   68.74
  -4  30   4   58.53   29.72
  -4 -30   4   72.62   41.36
  -4  30   3  443.65  121.84
  -4 -30   3  479.33  116.82
  -4  30   2  710.72  146.45
   4  30  -2  618.02   74.37
   4 -30  -2  632.69   34.61
  -4 -30   2  627.96  173.88
  -4  30   1    7.36   20.25
   4  30  -1    3.98    6.02
   4 -30  -1   -0.52   11.63
  -4  30   0   62.16   18.72
   4  30   0   54.95   11.73
   4 -30   0   51.17   18.10
  -4  30  -1  694.57   37.64
   4  30   1  666.99   60.08
   4 -30   1  602.07  105.62
  -4  30  -2   54.56   18.41
   4  30   2   25.85   14.58
   4 -30   2   55.54   13.78
   4  30   3   72.77   28.41
   4 -30   3   45.60   31.32
  -4  30  -4   32.32   16.53
  -4 -30  -4   26.87   37.29
   4 -30   4   20.99   19.49
  -4  30  -5    1.01   12.27
  -4 -30  -5   -5.55   23.92
   4 -30   5   11.83   23.75
  -4  30  -6   83.14   23.76
  -4 -30  -6   59.89   48.11
   4 -30   6   58.31   27.12
  -4  30  -7  222.87   69.41
  -4 -30  -7  130.71   71.29
   4 -30   7  197.30   87.82
  -4  32   7   50.00   28.03
  -4 -32   7   59.99   23.64
  -4  32   6  115.21   32.51
  -4 -32   6   77.86   48.23
  -4  32   5  210.02   69.49
  -4 -32   5  315.61   45.93
  -4  32   4  304.82   91.70
  -4 -32   4  268.64   84.97
  -4  32   3   91.26   36.68
  -4 -32   3  196.93   34.95
  -4  32   2   46.14   15.62
   4  32  -2   12.23    8.64
  -4 -32   2   25.67   25.68
   4  32  -1   66.91   21.07
  -4  32   1   55.48   14.73
   4 -32  -1   57.06   20.72
  -4 -32   1   64.61   22.61
  -4  32   0  110.65   38.98
   4  32   0  113.61   31.28
   4 -32   0   75.95   18.77
  -4 -32   0   55.03   21.59
  -4  32  -1  371.43   40.45
   4  32   1  357.50   36.76
   4 -32   1  417.55   98.43
  -4  32  -2  901.17  182.78
   4  32   2  761.72   71.08
   4 -32   2  814.84   71.44
  -4  32  -3   58.77   23.31
   4  32   3  129.81   24.58
   4 -32   3   92.39   21.80
  -4  32  -4   -1.12   12.01
   4 -32   4   40.60   20.54
  -4  32  -5  154.56   43.12
  -4 -32  -5   63.35   37.55
   4 -32   5   70.72   24.96
  -4  32  -6  103.62   40.33
  -4 -32  -6  163.22   65.06
   4 -32   6   67.73   20.75
  -4  34   6   51.11   16.78
  -4 -34   6   56.80   30.84
  -4  34   5   44.59   37.83
  -4 -34   5   96.68   52.63
  -4  34   4   81.42   32.37
  -4 -34   4   65.22   28.33
  -4  34   3   -7.58   17.95
  -4 -34   3  -10.75   24.10
  -4  34   2   59.91   21.50
  -4 -34   2   26.56   21.45
   4  34  -1  433.18   39.20
  -4  34   1  361.15   79.25
   4 -34  -1  265.82   94.50
  -4 -34   1  391.52   85.39
  -4  34   0   69.73   24.89
   4  34   0   55.11   22.64
   4 -34   0   76.46   27.18
  -4 -34   0   88.79   44.45
  -4  34  -1  159.66   75.15
   4  34   1  236.20   86.00
   4 -34   1  380.31   39.67
  -4  34  -2   58.66   22.99
   4  34   2   63.98   17.43
   4 -34   2   62.74   16.83
  -4 -34  -2   67.41   23.17
  -4  34  -3   -7.20   21.29
   4  34   3   -9.15   17.52
   4 -34   3   -2.10   19.81
  -4  34  -4  118.59   43.09
   4  34   4  188.35   25.66
   4 -34   4  106.05   49.39
  -4  34  -5   35.29   19.31
   4  34   5   41.66   18.36
  -4  36   5   56.44   24.75
  -4 -36   5   74.07   19.83
  -4  36   4  343.14   96.91
  -4 -36   4  389.42  132.51
  -4 -36   3   61.52   32.92
  -4  36   2   48.09   27.91
  -4 -36   2   62.52   25.56
  -4  36   1   38.40   15.70
  -4 -36   1   23.80   27.04
  -4  36   0   21.88   17.15
   4 -36   0   14.06   11.06
  -4 -36   0   25.47   16.04
  -4  36  -1   41.41   17.12
  -4 -36  -1   21.22   11.36
  -4  36  -2   35.23   28.70
   4  36   2   10.78    9.09
  -4  36  -3   25.25   15.75
   4  36   3    6.62   11.47
   4 -36   3   28.48   23.93
  -4  36  -4   31.51   15.38
   4 -36   4   81.74   37.51
  -4  38   3   47.38   27.30
  -4 -38   3   19.27   28.06
  -4  38   2  220.21  107.49
  -4 -38   2  393.58   85.46
  -4  38   1   98.73   23.44
  -4 -38   1   97.49   23.56
  -4  38   0   44.95   15.26
  -4 -38   0   53.46   23.88
  -4  38  -1   31.99   14.69
   4  38   1   -2.94   14.89
   4 -38   1   21.55   20.96
  -4  38  -2   28.95   21.53
   4  38   2   26.31   17.29
   4 -38   2    0.95   17.37
  -5   1  12    9.79   15.79
   5   1 -10   35.98   24.86
   5  -1 -10   46.77   32.99
  -5  -1  10   57.71   21.66
   5   1  -9  291.15   64.51
  -5   1   9  296.08   54.21
  -5  -1   9  263.79   44.48
  -5   1   8   25.21   25.23
  -5   1   8   63.78   21.92
  -5   1   8   98.62   23.21
  -5   1   8   24.56   16.16
  -5  -1   8  149.27   37.52
  -5  -1   8  113.76   24.34
  -5   1   7  337.40   45.73
  -5   1   7  235.61   70.97
  -5  -1   7  264.21   42.91
  -5  -1   7  263.70   44.49
  -5   1   6   23.47   24.16
  -5   1   6   17.37   28.74
  -5   1   6   16.79    9.90
  -5  -1   6   10.62    9.09
  -5  -1   6   14.82   19.53
  -5  -1   6   31.63   40.75
  -5   1   5  211.41   62.25
  -5   1   5  195.52   69.48
  -5   1   5  238.32   26.41
   5   1  -5  343.64   50.69
  -5  -1   5  270.22   29.03
   5  -1  -5  292.74   45.36
  -5  -1   5  229.27   16.68
  -5  -1   5  290.17   49.93
  -5   1   4 4007.95  169.56
  -5   1   4 4760.93  211.80
  -5   1   4 5117.72  232.22
   5   1  -4 4794.03  236.69
  -5  -1   4 4629.34  204.64
  -5  -1   4 4508.58  188.96
   5  -1  -4 4698.14  231.50
  -5  -1   4 5304.96  245.50
  -5   1   3 1744.18   56.25
   5   1  -3 1573.54   50.67
   5   1  -3 1426.67   84.75
  -5  -1   3 1731.38   54.46
   5  -1  -3 1582.75   52.72
   5  -1  -3 1375.37   71.17
  -5  -1   3 1982.78   94.69
  -5   1   2 5392.63  167.18
  -5   1   2 5184.21  152.14
   5   1  -2 5220.21  152.13
   5   1  -2 5159.79  183.31
  -5  -1   2 4866.53  141.39
   5  -1  -2 5123.43  180.16
   5  -1  -2 5107.18  149.14
  -5  -1   2 4474.72  163.85
   5   1  -1 6031.14  146.53
   5  -1  -1 6185.90  155.33
  -5  -1   1 6303.92  157.39
  -5   1   0  211.12   33.04
   5   1   0  184.35   28.58
  -5   1   0  181.25   20.70
   5   1   0  193.26   38.23
  -5  -1   0  238.45   28.41
   5  -1   0  172.75   26.57
   5  -1   0  213.34   47.29
  -5  -1   0  117.39   23.80
  -5   1  -1  235.41   50.53
  -5   1  -1  102.49   11.96
   5   1   1  252.08   57.66
   5   1   1  142.38   23.98
   5  -1   1  141.24   15.74
  -5  -1  -1  125.43   34.10
  -5  -1  -1  124.93   18.45
   5  -1   1  108.07   34.15
   5   1   2 3935.74  123.63
  -5   1  -2 4415.95  148.97
  -5   1  -2 4027.67  131.83
   5  -1   2 4290.30  134.10
  -5  -1  -2 3869.84  165.18
  -5  -1  -2 4288.53  133.21
   5  -1   2 3451.02  111.46
   5   1   3  -21.53   23.69
  -5   1  -3   37.39   25.09
  -5   1  -3   25.55    7.18
   5   1   3   26.76   12.47
  -5  -1  -3    5.39   35.66
   5  -1   3   13.95    8.86
   5  -1   3    9.36   14.66
  -5  -1  -3   21.81    8.69
  -5   1  -4 2514.19  138.64
   5   1   4 2374.09  104.00
  -5   1  -4 2221.25   97.81
   5   1   4 2544.36  122.13
   5  -1   4 2498.13  109.64
  -5  -1  -4 2186.08  120.76
   5  -1   4 2738.19  198.86
  -5   1  -5 1693.57   70.92
  -5   1  -5 1706.48  100.33
   5   1   5 1672.51   70.41
   5  -1   5 2063.48   82.22
  -5  -1  -5 2112.27  194.57
  -5  -1  -5 1708.56   70.95
   5   1   6   39.46   24.21
  -5   1  -6  174.48   70.25
  -5  -1  -6   -9.50   43.09
   5  -1   6   35.02   12.01
  -5   1  -7  -31.55   44.74
   5   1   7   37.46   28.78
   5  -1   7   24.07   26.31
  -5  -1  -7   -9.13   41.22
  -5   1  -8   94.50   69.75
  -5  -1  -8   49.38   49.52
   5  -1   8   70.03   19.69
  -5   1  -9   30.60   59.34
   5   1   9   50.90   20.43
   5  -1   9   55.99   18.99
  -5  -1  -9   77.67   55.13
  -5   1 -10   61.61   42.63
   5   1  10    6.22   26.72
   5  -1  10   25.98   11.90
  -5  -1 -10   72.84   58.57
  -5  -1 -11   51.71   55.12
  -5   3  11  212.72   27.53
  -5   3  11  369.56   38.27
  -5  -3  11  317.74   99.03
   5   3 -10  518.11   68.15
  -5   3  10  302.91   32.75
  -5   3  10  412.06   42.66
  -5  -3  10  288.84   36.84
   5   3  -9   34.89   22.97
  -5   3   9   34.45   13.95
  -5   3   9   35.96   17.49
  -5  -3   9   47.71   19.53
  -5   3   8  228.70   79.23
  -5   3   8  432.53   71.61
  -5   3   8  504.33   63.44
  -5  -3   8  655.18   86.35
  -5  -3   8  593.04  116.76
  -5   3   7  181.86   25.51
  -5   3   7  267.35   44.68
  -5  -3   7  132.24   31.39
  -5  -3   7  220.45   42.22
  -5   3   6    3.36   19.69
  -5  -3   6   37.92    9.97
  -5  -3   6   25.11   13.56
  -5  -3   6   61.09   32.09
  -5   3   5 3631.59  214.93
   5   3  -5 3323.55  223.84
  -5   3   5 3618.95  203.16
  -5   3   5 3944.65  247.03
  -5  -3   5 3672.45  203.86
  -5  -3   5 3699.61  213.15
   5  -3  -5 3539.12  219.14
  -5  -3   5 2956.04  246.44
  -5   3   4 6169.06  258.51
  -5   3   4 5995.99  264.01
   5   3  -4 6210.99  299.78
  -5  -3   4 6238.14  266.96
   5  -3  -4 6298.43  293.02
  -5  -3   4 6038.37  251.03
  -5  -3   4 6352.52  289.41
   5   3  -3  670.22  158.64
  -5   3   3  445.86   60.86
   5   3  -3  379.05   19.21
  -5   3   3  408.95   28.33
  -5  -3   3  451.67   28.87
  -5  -3   3  444.37   53.15
   5  -3  -3  427.63  112.70
   5  -3  -3  483.19   41.08
   5   3  -2 8011.88  259.49
  -5   3   2 8651.03  249.07
   5   3  -2 7994.14  227.90
   5  -3  -2 8165.28  235.06
  -5  -3   2 9342.15  267.36
   5   3  -1  307.85   56.24
   5   3  -1  297.17   23.32
  -5   3   1  290.18   21.57
  -5   3   1  337.35   22.15
   5  -3  -1  438.20   35.45
  -5  -3   1  273.68   26.68
  -5  -3   1  317.79   71.22
   5  -3  -1  419.55   49.62
   5   3   0 3327.48  110.81
  -5   3   0 3586.30  116.77
   5   3   0 2869.58  103.93
  -5   3   0 3454.81  106.65
  -5  -3   0 3685.00  121.91
   5  -3   0 3078.07   98.15
  -5   3  -1 1465.50   57.82
   5   3   1 1825.10   86.20
  -5   3  -1 1679.47   59.60
   5  -3   1 1935.70   68.42
  -5  -3  -1 1769.45  141.88
  -5  -3  -1 1708.49   60.91
   5  -3   1 1726.44   64.37
   5   3   2 1611.47   65.41
   5   3   2 1142.91   61.96
  -5   3  -2 1538.23  155.90
  -5   3  -2 1340.98   51.88
  -5  -3  -2 1359.70  123.34
   5  -3   2 1236.68   50.47
  -5  -3  -2 1311.24   50.60
   5  -3   2 1218.20   50.84
  -5   3  -3 5781.47  281.47
   5   3   3 5583.82  270.25
  -5   3  -3 5445.97  233.84
   5   3   3 4829.19  207.02
  -5  -3  -3 5520.88  251.51
   5  -3   3 4532.33  216.17
   5  -3   3 5906.09  252.29
  -5  -3  -3 5848.32  248.17
   5   3   4 8585.24  484.29
  -5   3  -4 8143.12  464.86
  -5   3  -4 9113.31  505.68
   5   3   4 8015.66  453.06
  -5  -3  -4 8023.33  461.20
   5  -3   4 9216.81  513.21
  -5  -3  -4 8154.94  451.90
   5  -3   4 7030.18  393.17
  -5   3  -5  149.97   36.05
   5   3   5  205.88   29.33
  -5  -3  -5  193.61   62.66
  -5  -3  -5  199.21   33.21
   5  -3   5  216.60   35.37
  -5   3  -6 4908.97  142.86
   5   3   6 5046.18   74.43
   5  -3   6 4671.71  292.51
  -5   3  -7   26.91   42.10
   5   3   7   23.14   18.05
  -5  -3  -7   45.59   24.79
   5  -3   7   16.52   13.05
   5   3   8  128.36   23.73
  -5   3  -8  177.27   56.36
  -5  -3  -8  130.49   46.76
   5  -3   8   87.54   23.85
   5   3   9  358.14   41.25
  -5   3  -9  251.27   57.44
  -5  -3  -9  324.68   93.84
   5  -3   9  234.10   52.13
   5   3  10  173.50   63.22
   5  -3  10  275.97   35.03
  -5  -3 -10  273.12   83.42
  -5   3 -11  127.88   91.76
  -5  -3 -11   33.68   42.18
   5   5 -11  210.75   56.07
  -5  -5  11  129.97   46.03
  -5   5  10   59.50   25.20
  -5  -5  10   37.63   22.22
   5   5  -9  413.06   48.24
  -5   5   9  430.89   26.58
  -5   5   9  492.44   27.60
  -5  -5   9  423.28   35.28
  -5   5   8 1234.97   97.55
  -5   5   8  578.25  206.90
  -5   5   8 1305.66  102.10
  -5   5   7  843.03   56.92
  -5   5   7  867.89   61.42
  -5  -5   7  890.19   68.54
  -5  -5   7  920.55   58.64
  -5   5   6   69.01   27.98
  -5   5   6  126.64   19.16
  -5   5   6  102.00   22.98
  -5  -5   6   82.17   18.69
  -5  -5   6  120.03   11.72
  -5  -5   6   85.40   35.97
  -5   5   5 3938.61  233.90
   5   5  -5 3572.53  236.25
  -5   5   5 4014.70  225.91
  -5   5   5 2760.33  158.89
  -5  -5   5 3908.17  216.63
   5  -5  -5 4027.12  254.80
  -5  -5   5 3450.96  214.87
  -5  -5   5 4017.41  228.22
  -5   5   4   26.05   19.67
   5   5  -4   11.53   62.05
  -5   5   4    7.61   11.67
  -5   5   4   -7.02    9.65
  -5  -5   4   12.73    5.20
   5  -5  -4   26.90   13.07
  -5  -5   4   30.48   23.84
  -5  -5   4   -1.28    9.84
   5   5  -312058.39  535.70
  -5   5   314245.78  500.08
  -5   5   311071.47  461.32
  -5  -5   314334.83  496.53
  -5  -5   311084.43  460.24
   5  -5  -311465.05  489.49
  -5  -5   311380.33  492.92
   5  -5  -310653.50  442.11
   5   5  -2 5042.51  182.86
   5   5  -2 6071.50  172.97
  -5   5   2 5558.04  163.39
  -5   5   2 5741.17  168.73
   5  -5  -2 5718.15  168.17
   5  -5  -2 4757.38  148.47
  -5  -5   2 4972.01  144.75
  -5   5   122742.48  642.08
  -5   5   124463.09  689.91
  -5  -5   124641.90  697.44
   5  -5  -129718.07 1912.15
  -5  -5   120726.10  594.44
   5  -5  -124315.42  685.30
   5   5   0 1120.49   76.83
  -5   5   0 1618.95   61.89
  -5   5   0 1308.16   47.56
   5   5   0 1022.67  151.43
  -5  -5   0 1241.45   73.07
   5  -5   0 1269.94   46.20
  -5  -5   0 1586.44   62.32
   5  -5   0 1216.33   47.46
   5   5   1 1125.23   83.83
   5   5   1 1200.94   51.89
  -5   5  -1 1171.85   59.46
  -5   5  -1 1166.38   44.02
   5  -5   1 1084.83   74.69
   5  -5   1 1334.01   53.76
  -5  -5  -1 1423.09   75.07
   5   5   2   32.72   20.30
  -5   5  -2   96.18   33.01
   5   5   2   43.76   19.43
  -5   5  -2   63.95   15.82
  -5  -5  -2   41.82   31.72
   5  -5   2   38.34   12.16
  -5  -5  -2   34.99    9.52
   5  -5   2   44.55   13.85
   5   5   3 1532.09  228.66
  -5   5  -3 1698.38   91.74
  -5   5  -3 1615.99   77.95
   5   5   3 1266.42   61.15
  -5  -5  -3 1591.98  109.66
   5  -5   3 1552.61  153.00
   5  -5   3 1601.64   76.96
  -5  -5  -3 1570.84   77.17
   5   5   4   47.80   19.83
  -5   5  -4   22.28   33.38
   5   5   4   34.64   25.00
  -5   5  -4   40.57   17.63
  -5  -5  -4  -93.60   38.76
  -5  -5  -4   39.95   12.74
   5  -5   4   62.77   19.57
   5  -5   4   10.09   15.41
   5   5   5  946.65  113.22
  -5   5  -5 1138.53  194.83
  -5  -5  -5  865.10   99.19
   5  -5   5  780.37   78.77
  -5  -5  -5  811.25   77.77
  -5   5  -6  364.45   84.35
   5   5   6  260.90   54.92
  -5  -5  -6  310.11   55.85
   5  -5   6  294.55   59.95
   5   5   7   20.91   17.84
  -5   5  -7   -2.93   39.37
  -5  -5  -7   89.36   63.30
   5  -5   7   30.02   23.14
   5   5   8   30.76    8.35
  -5   5  -8   87.37   68.59
  -5  -5  -8   20.10   44.11
   5  -5   8   81.27   21.96
  -5   5  -9   86.69   48.91
  -5  -5  -9  154.07   76.34
   5  -5   9  142.00   30.18
   5   5  10   78.31   30.57
  -5   5 -10  114.92   56.08
  -5  -5 -10  120.41   73.48
   5  -5  10   61.70   31.53
  -5   5 -11  102.37   61.56
  -5  -5 -11   63.75   71.12
  -5  -7  12   58.35   28.60
  -5   7  11  140.74   72.01
  -5  -7  11  253.94   48.75
   5   7 -10   34.28   23.22
  -5   7  10   15.86   12.47
  -5  -7  10   -9.09   22.15
  -5   7   9    4.88   16.26
  -5   7   9   12.42   11.05
  -5  -7   9   33.72   30.71
  -5   7   8  123.58   34.63
  -5   7   8  113.92   19.79
  -5  -7   8  161.66   19.81
  -5  -7   8  136.05   51.72
  -5   7   7  217.04   49.87
  -5   7   7  203.63   39.75
  -5   7   7  189.21   54.09
  -5  -7   7  177.40   27.16
  -5   7   6  170.22   44.22
  -5   7   6  247.22   64.09
  -5   7   6  145.82   37.41
  -5  -7   6  199.64   44.55
  -5  -7   6  237.59   33.47
  -5   7   5 1973.81  132.23
  -5   7   5 2035.41  118.25
  -5   7   5 1635.75  108.78
  -5  -7   5 1978.29  114.31
  -5  -7   5 1911.11  107.20
  -5  -7   5 1474.42  113.18
   5  -7  -5 1761.15  161.82
  -5   7   4  108.02   27.54
   5   7  -4   95.72   29.00
  -5   7   4  144.78   23.90
  -5   7   4  142.34   34.16
  -5  -7   4  110.43   12.56
   5  -7  -4  118.17   28.75
  -5  -7   4  181.26   37.31
  -5  -7   4   90.60   12.23
   5   7  -3 3363.72  188.48
  -5   7   3 3503.97  148.98
  -5   7   3 3371.04  145.64
  -5  -7   3 2997.90  125.23
  -5  -7   3 3636.22  154.48
   5  -7  -3 3707.83  171.81
  -5  -7   3 3710.24  184.55
   5  -7  -3 3393.23  149.27
   5   7  -2 1503.12  108.44
   5   7  -2 1420.67   43.93
  -5   7   2 1393.99   50.57
  -5   7   2 1346.01   47.14
  -5  -7   2 1366.60   48.06
  -5  -7   2 1486.95   93.41
   5  -7  -2 1321.77   53.13
   5  -7  -2 1453.96   51.94
   5   7  -1 2059.50  121.27
   5   7  -1 2073.15   64.87
  -5   7   1 1844.81   63.65
  -5   7   1 2207.13   71.86
  -5  -7   1 2224.26  111.23
   5  -7  -1 2003.90   70.96
   5   7   0  241.36   56.28
   5   7   0  160.25   34.01
  -5   7   0  160.12   23.34
  -5   7   0  159.02   16.97
  -5  -7   0  154.59   25.15
  -5  -7   0  175.33   24.80
   5  -7   0  120.27   16.09
   5  -7   0  139.13   31.17
   5   7   1 1146.38   52.79
   5   7   1 1399.29   64.97
  -5   7  -1 1393.81   97.65
  -5   7  -1 1387.85   50.51
  -5  -7  -1 1380.49   68.75
   5  -7   1 1378.24   51.19
  -5  -7  -1 1286.41   83.32
   5  -7   1 1312.50   47.33
   5   7   2 1132.78   87.06
   5   7   2  764.60   61.76
  -5   7  -2  870.45  108.51
  -5   7  -2 1049.71   54.15
   5  -7   2 1167.65  101.03
  -5  -7  -2  908.13   57.33
  -5  -7  -2  933.58   42.66
   5  -7   2 1060.79   56.80
   5   7   3  204.22   36.39
   5   7   3   95.14   24.17
  -5   7  -3  199.93   35.99
  -5   7  -3  121.20   27.81
  -5  -7  -3  110.39   48.22
  -5  -7  -3   66.80   11.19
   5  -7   3  104.73   22.19
   5  -7   3   96.67   16.25
   5   7   4 3127.27  183.91
   5   7   4 1907.38  123.65
  -5   7  -4 2704.69  171.07
   5  -7   4 2215.87  133.50
  -5  -7  -4 2447.46  158.45
  -5  -7  -4 2346.69  136.63
   5  -7   4 2361.93  143.62
   5   7   5  960.63  131.62
  -5   7  -5 1044.21  219.87
  -5  -7  -5 1007.26   98.41
  -5  -7  -5  899.21   60.64
   5  -7   5  970.57  109.01
   5   7   6   72.43   18.69
  -5   7  -6   38.33   24.73
  -5  -7  -6   55.81   37.18
   5  -7   6  -13.80   18.23
  -5  -7  -6   36.44   11.64
   5   7   7    4.34   13.12
  -5   7  -7  -21.74   42.63
  -5  -7  -7   89.34   56.52
   5  -7   7   34.77   27.37
   5   7   8   78.35   19.52
  -5   7  -8   35.15   43.83
  -5  -7  -8   84.53   48.26
   5  -7   8   37.02   14.45
  -5   7  -9  -15.68   44.80
   5  -7   9   49.89   21.31
   5   7  10   13.90   14.96
  -5   7 -10   32.20   46.70
  -5  -7 -10   31.20   51.99
   5  -7  10  -17.09   19.57
  -5   7 -11   22.17   35.50
  -5  -7 -11  -42.79   50.29
  -5   9  11   21.71   18.12
  -5  -9  11   33.29   23.00
  -5   9  10  637.71   93.36
  -5  -9  10  635.40  113.41
  -5   9   9    3.48   15.03
  -5   9   9   15.39   12.06
  -5  -9   9   21.85   22.45
  -5   9   8  647.67   94.96
  -5   9   8  793.96   79.86
  -5  -9   8  753.56   78.30
  -5  -9   8  840.22  100.24
  -5   9   7    7.85    9.71
  -5   9   7  -10.21   17.66
  -5   9   7   15.35    7.38
  -5  -9   7   -0.83    5.62
  -5  -9   7   18.80   13.15
  -5   9   6  539.04   62.06
  -5   9   6  464.91   47.68
  -5  -9   6  499.90   67.82
  -5  -9   6  531.09   50.42
  -5   9   5   70.68   19.22
  -5   9   5   25.26   10.53
  -5  -9   5   39.08    7.96
  -5  -9   5   33.54    3.80
  -5   9   4  603.56  165.29
  -5   9   4  569.51   29.26
   5   9  -4  959.62   99.18
  -5   9   4  736.18   35.81
   5  -9  -4  602.58   36.13
  -5  -9   4  603.86  106.33
  -5   9   3   27.83   13.31
  -5   9   3   32.68   13.97
   5   9  -3   58.92   24.38
   5  -9  -3    8.61   21.62
  -5  -9   3  -13.56   32.68
   5  -9  -3   13.07   12.69
   5   9  -2  215.33   83.79
   5   9  -2  187.43   15.10
  -5   9   2  234.86   36.70
   5  -9  -2  224.38   21.47
  -5  -9   2  185.49   22.75
  -5  -9   2  222.51   64.37
   5  -9  -2  264.46   54.19
   5   9  -1 1986.05  104.66
   5   9  -1 1856.16   58.78
  -5   9   1 2145.07   74.88
  -5   9   1 2107.47   68.38
   5  -9  -1 2139.21   70.22
   5  -9  -1 1783.24   61.90
  -5  -9   1 2014.92   75.66
   5   9   0  356.19  104.98
   5   9   0  381.50   33.72
  -5   9   0  207.02   17.21
  -5   9   0  295.77   21.71
   5  -9   0  254.00   19.63
  -5  -9   0  270.26   25.33
   5  -9   0  311.07   24.44
  -5  -9   0  255.64   49.90
   5   9   1  219.87   49.36
   5   9   1  155.14   24.86
  -5   9  -1  132.30   20.18
  -5   9  -1  123.78   14.78
  -5  -9  -1  218.34   36.48
  -5  -9  -1  229.10   28.27
   5  -9   1  142.25   17.51
   5  -9   1  151.83   24.64
   5   9   2 2614.00  123.96
   5   9   2 2654.08  138.13
  -5   9  -2 2637.73  121.23
  -5   9  -2 3322.96  147.88
  -5  -9  -2 3092.40  151.90
  -5  -9  -2 2944.20  128.82
   5  -9   2 3170.30  141.03
   5  -9   2 3008.43  131.44
   5   9   3  341.40   56.94
   5   9   3  250.79   39.52
  -5   9  -3  433.51   95.96
  -5   9  -3  217.40   23.05
  -5  -9  -3  310.01   40.58
  -5  -9  -3  287.42   57.26
   5  -9   3  270.91   59.47
   5  -9   3  247.58   40.88
   5   9   4  624.97   86.16
  -5   9  -4  592.26  131.27
  -5  -9  -4  507.11   77.22
   5  -9   4  634.39  123.70
  -5  -9  -4  446.77   62.44
   5   9   5  415.06   90.12
  -5   9  -5  279.08   52.46
  -5  -9  -5  308.62   66.42
  -5  -9  -5  308.59   63.19
   5  -9   5  390.35   44.98
   5   9   6  170.12   42.13
  -5   9  -6  228.54  100.45
  -5  -9  -6  247.72   67.74
  -5  -9  -6  124.22   16.72
   5  -9   6  229.29   60.13
   5   9   7  149.15   46.31
  -5   9  -7  225.18   84.95
  -5  -9  -7  106.49   58.75
   5  -9   7  193.03   28.02
   5   9   8  775.96   57.25
  -5   9  -8  919.34   74.38
  -5  -9  -8 1264.76  106.25
   5  -9   8 1007.52  134.09
  -5   9  -9  132.85   44.15
  -5  -9  -9  136.89   88.53
   5  -9   9   96.81   37.80
   5   9  10   94.51   40.98
  -5   9 -10   60.51   47.91
  -5  -9 -10   34.83   52.08
   5  -9  10   63.48   32.70
  -5 -11  11  428.72  100.24
  -5  11  10   61.52   25.21
  -5 -11  10   66.74   24.47
  -5  11   9  624.02  100.24
  -5  11   8  146.18   29.84
  -5  11   8  135.79   34.59
  -5  11   8  129.69   14.72
  -5 -11   8  147.65   22.92
  -5 -11   8  159.28   38.39
  -5  11   7  823.28   69.71
  -5  11   7  748.33   58.65
  -5 -11   7  563.27   64.78
  -5 -11   7  740.27   55.72
  -5 -11   7  701.04   99.85
  -5  11   6  544.56   63.04
  -5  11   6  685.71   30.14
  -5 -11   6  500.08   50.01
  -5 -11   6  493.01   49.05
  -5  11   5 7030.12  238.52
  -5  11   5 6863.74  224.19
   5 -11  -5 5948.89  214.09
  -5  11   4  131.59   40.29
  -5  11   4  166.58   21.16
   5  11  -4  105.28   60.59
  -5  11   4  194.12   15.80
   5 -11  -4  167.94   23.06
  -5 -11   4  221.06   51.64
  -5  11   3 9268.80  364.06
   5  11  -3 6737.90  368.39
  -5  11   3 9326.77  361.87
   5 -11  -3 6685.46  265.06
  -5 -11   3 8507.37  389.01
   5  11  -2  176.54   54.42
   5  11  -2  254.48   18.45
  -5  11   2  224.76   30.12
  -5  11   2  188.12   32.30
  -5 -11   2  200.81   29.78
  -5 -11   2  153.22   49.62
   5 -11  -2  279.11   32.12
   5 -11  -2  154.30   16.53
   5  11  -1  305.51   59.34
   5  11  -1  356.79   37.71
  -5  11   1  267.96   26.48
  -5  11   1  226.48   34.68
  -5 -11   1  250.33   26.16
  -5 -11   1  339.23  104.34
   5 -11  -1  268.20   26.11
   5 -11  -1  260.58   65.42
   5  11   0   94.59   41.22
   5  11   0   96.29   16.27
  -5  11   0  140.33   28.66
  -5  11   0   79.79   15.21
  -5 -11   0  137.74   31.48
  -5 -11   0   68.04   16.81
   5 -11   0  109.59   24.99
   5 -11   0   52.82   14.31
   5  11   110273.23  451.99
   5  11   1 8177.68  354.71
  -5  11  -110642.69  447.75
  -5  11  -1 9929.15  415.75
  -5 -11  -110511.22  450.54
  -5 -11  -111095.70  467.15
   5 -11   1 9678.30  404.64
   5 -11   110490.42  437.64
   5  11   2 1345.03   97.14
   5  11   2  772.53   49.38
  -5  11  -2  937.36   89.52
  -5  11  -2  928.02   48.58
  -5 -11  -2  926.58   64.34
  -5 -11  -2  875.18   52.42
   5 -11   2  927.24   51.05
   5 -11   2  965.07   51.19
   5  11   3 1143.57  101.01
   5  11   3 1368.53  243.78
  -5  11  -3 1756.93  149.30
  -5  11  -3 1422.52   89.05
  -5 -11  -3 1339.84  103.97
  -5 -11  -3 1422.26   84.68
   5 -11   3 1257.16   81.22
   5 -11   3 1290.59   78.66
   5  11   4  105.05   33.48
  -5  11  -4   64.68   36.60
  -5 -11  -4   69.14   36.71
   5 -11   4  107.84   29.84
  -5 -11  -4   96.63   13.59
   5  11   5  959.40  101.05
  -5  11  -5  986.53  152.52
  -5 -11  -5  702.40   75.55
  -5 -11  -5  670.73   72.09
   5 -11   5  800.73  118.90
   5  11   6   38.98   15.02
  -5  11  -6   48.63   31.99
  -5 -11  -6  223.85   79.63
  -5 -11  -6   61.82   11.15
   5 -11   6   18.04   13.68
   5  11   7  808.36  122.07
  -5  11  -7 1082.11  139.56
  -5 -11  -7  690.21  110.75
   5 -11   7  667.42  162.37
   5  11   8  439.30  126.78
  -5  11  -8  442.33   83.11
  -5 -11  -8  519.24  110.42
   5 -11   8  497.20   84.59
   5  11   9  138.24   65.28
  -5  11  -9  193.11   67.73
  -5 -11  -9  124.49   58.15
   5 -11   9  157.96   28.74
  -5  11 -10   66.88   53.46
  -5 -11 -10  116.31   57.36
   5 -11  10   26.38   11.69
  -5  13  11   36.29   12.06
  -5 -13  11   44.96   22.22
  -5  13  10   93.82   38.16
  -5 -13  10   58.29   26.06
  -5  13   9   20.54   18.49
  -5 -13   9   86.29   22.45
  -5  13   8  482.31   53.76
  -5  13   8  648.65   78.37
  -5 -13   8  488.15   54.07
  -5 -13   8  490.18   87.00
  -5  13   7  117.54   27.01
  -5  13   7  130.51   28.03
  -5  13   7  158.79   37.16
  -5 -13   7  112.60   24.78
  -5 -13   7   83.48   17.13
  -5 -13   7  168.62   47.05
  -5  13   6   24.77   17.54
  -5  13   6    3.59    3.08
  -5  13   6   11.05    6.01
  -5  13   5  861.11   37.01
  -5  13   5  804.94   75.79
   5 -13  -5  725.97   94.12
  -5  13   4  699.60   69.61
   5  13  -4  725.06  120.66
  -5  13   4  719.52   66.24
   5 -13  -4  718.78  103.27
  -5  13   3  247.00   33.55
  -5  13   3  265.35   48.04
   5  13  -3  295.53   68.14
  -5  13   3  321.74   13.08
   5 -13  -3  239.21   25.93
  -5 -13   3  134.94   40.68
   5  13  -2 2046.24  216.59
   5  13  -2 1342.16   53.79
  -5  13   2 1554.23   86.22
  -5  13   2 1385.97   59.53
   5 -13  -2 1443.44   67.16
  -5 -13   2 1211.34  277.18
  -5 -13   2 1442.02   61.71
  -5  13   1   86.01   14.24
   5  13  -1  150.44   17.31
  -5  13   1  208.47   15.43
   5  13  -1  278.92   89.62
  -5 -13   1  173.42   22.29
   5 -13  -1  224.68   44.64
  -5 -13   1  161.51   31.36
   5  13   0  661.09   64.01
   5  13   0  809.56   44.26
  -5  13   0 1004.30   49.84
  -5  13   0 1010.34   52.42
  -5 -13   0  992.91   66.09
  -5 -13   0  747.42   47.23
   5 -13   0  890.90   43.99
   5 -13   0  942.08   45.90
   5  13   1  318.47   49.99
   5  13   1  325.67   64.66
  -5  13  -1  410.69   79.72
  -5  13  -1  359.21   30.09
  -5 -13  -1  354.86   39.27
  -5 -13  -1  329.98   43.84
   5 -13   1  346.29   46.21
   5 -13   1  293.99   21.65
   5  13   2 2135.95  144.57
   5  13   2 2202.12  137.80
  -5  13  -2 2069.15  126.51
  -5  13  -2 1954.18  116.53
  -5 -13  -2 2083.24  139.87
  -5 -13  -2 1729.22  114.50
   5 -13   2 2005.87  120.05
   5 -13   2 2036.82  118.79
   5  13   3  712.04  113.86
   5  13   3  752.86  184.47
  -5  13  -3  480.90   52.38
   5 -13   3  613.10   74.31
  -5 -13  -3  829.67   98.88
  -5 -13  -3  736.46   77.18
   5 -13   3  689.46   70.76
   5  13   4  161.98   32.85
  -5  13  -4  427.12   87.61
  -5 -13  -4  365.53   67.76
  -5 -13  -4  185.05   32.26
   5 -13   4  195.03   35.82
   5  13   5   76.87   33.28
  -5  13  -5   63.46   23.21
  -5 -13  -5  231.53   60.50
   5 -13   5   99.93   20.14
   5  13   6  380.94   63.82
  -5  13  -6  301.98   60.47
  -5 -13  -6  460.94  133.20
  -5 -13  -6  331.21   42.27
   5 -13   6  445.59   59.44
   5  13   7  462.29  135.09
  -5  13  -7  472.73  189.60
  -5 -13  -7  592.65  100.82
   5 -13   7  443.69   57.60
   5  13   8  396.52  114.85
  -5 -13  -8  219.38   54.49
   5 -13   8  256.88   77.00
   5  13   9   18.93   19.35
  -5  13  -9   13.39   43.29
  -5 -13  -9   39.26   53.61
   5 -13   9   55.16   22.25
  -5  13 -10   86.37   62.08
  -5 -13 -10   22.09   59.72
   5 -13  10   45.23   28.96
  -5 -15  11   -0.88   28.03
  -5  15  10   32.22   11.17
  -5 -15  10   69.60   27.49
  -5  15   9   73.39   23.02
  -5 -15   9  120.27   28.42
  -5  15   8  287.97   43.80
  -5 -15   8  278.89   44.79
  -5  15   7  102.30   27.90
  -5 -15   7   56.37   29.22
  -5  15   6   82.22   24.69
  -5  15   6   70.20    7.79
  -5  15   6   36.73    8.43
  -5  15   5  275.50   55.52
  -5  15   5  191.79   31.53
   5 -15  -5  248.33   31.58
  -5  15   4  716.71   78.35
  -5  15   4  628.81   61.51
   5 -15  -4  656.66   67.25
  -5  15   3   75.63   16.99
   5  15  -3  130.94   77.37
  -5  15   3   53.02   10.87
   5 -15  -3   59.95   10.76
   5  15  -2 1266.21   72.48
  -5  15   2 1417.11   88.12
   5  15  -2 1506.25  251.30
   5  15  -2 1235.21   68.92
  -5  15   2 1405.31   81.86
   5 -15  -2 1248.03   77.19
   5 -15  -2 1143.23   67.47
  -5 -15   2 1102.44   90.24
   5  15  -1  455.69   64.18
   5  15  -1  410.99   24.66
  -5  15   1  442.56   23.16
  -5  15   1  391.61   23.86
  -5 -15   1  466.46   33.46
  -5 -15   1  421.55   49.52
   5 -15  -1  455.74   20.31
   5 -15  -1  394.82   22.45
   5  15   0  141.05   82.78
   5  15   0  121.64   20.13
  -5  15   0  108.82   19.58
  -5  15   0  103.40   16.89
  -5 -15   0   79.53   21.38
  -5 -15   0   82.99   18.68
   5 -15   0  130.76   22.06
   5 -15   0  137.49   14.46
   5  15   1  282.51   52.79
   5  15   1  420.98   33.96
  -5  15  -1  665.87   90.77
  -5  15  -1  375.95   58.35
   5 -15   1  437.94   29.73
   5 -15   1  440.63   35.26
  -5 -15  -1  398.11   33.25
   5  15   2  108.50   45.21
   5  15   2  120.88   23.82
  -5  15  -2  132.34   28.09
  -5  15  -2   66.03   25.59
  -5 -15  -2   96.09   36.49
  -5 -15  -2  109.59   16.01
   5 -15   2  122.43   22.60
   5 -15   2   99.31   26.86
  -5  15  -3  164.07   36.89
   5  15   3  109.51   32.76
   5  15   3  174.95   42.02
  -5 -15  -3  243.08   59.78
  -5 -15  -3  172.06   43.23
   5 -15   3  188.62   32.24
   5  15   4  518.71  115.96
  -5  15  -4  567.82  129.49
  -5 -15  -4  386.36   71.05
  -5 -15  -4  379.04   59.98
   5 -15   4  430.24   54.78
   5  15   5  103.80   26.53
  -5  15  -5  120.93   38.48
  -5 -15  -5  189.03   53.90
   5 -15   5  185.07   37.57
  -5 -15  -5  159.05   32.77
   5  15   6  359.72  117.09
  -5  15  -6  462.16  151.18
  -5 -15  -6  736.62  100.73
   5 -15   6  536.68   63.31
   5  15   7   35.80   21.42
  -5  15  -7   66.44   35.63
  -5 -15  -7   27.86   44.82
   5 -15   7   58.23   23.31
  -5  15  -8   28.11   22.82
  -5 -15  -8  -16.76   45.76
   5 -15   8   -7.51   21.45
  -5  15  -9   34.65   47.72
  -5 -15  -9   12.47   54.11
   5 -15   9   39.69   17.36
  -5  15 -10  152.37   72.35
  -5 -15 -10   52.42   52.47
   5 -15  10   50.93   18.62
  -5  17  11   30.47   26.22
  -5 -17  11   34.32   29.60
  -5  17  10  140.05   48.03
  -5 -17  10  226.05   47.18
  -5  17   9  646.70   69.71
  -5 -17   9  552.38   62.77
  -5  17   8   -2.64   18.21
  -5 -17   8   31.20   25.21
  -5  17   7 2276.61  251.28
  -5 -17   7 2378.80  266.71
  -5  17   6   42.06   21.72
  -5  17   5 1357.51  191.74
  -5  17   4 2476.83  153.90
  -5  17   4 2614.78  155.25
   5 -17  -4 2617.88  161.38
  -5  17   3 4018.88  242.70
   5  17  -3 3838.47  272.31
  -5  17   3 4249.64  251.58
   5 -17  -3 3998.39  241.60
   5  17  -2  441.23   44.26
  -5  17   2  546.02   86.11
   5  17  -2  399.72   36.85
   5  17  -2  566.38  125.47
  -5  17   2  430.90   80.77
   5 -17  -2  411.01   41.76
  -5  17   1 5823.13  207.48
   5  17  -1 6216.88  227.11
  -5  17   1 5634.70  190.44
   5  17  -1 5641.45  657.84
  -5 -17   1 5957.90  208.63
   5 -17  -1 5807.67  201.79
  -5 -17   1 5931.99  232.81
  -5  17   0   11.37   13.81
  -5  17   0   27.37   10.92
   5  17   0   43.64   30.68
  -5 -17   0   53.19   19.90
  -5 -17   0   28.79   15.31
   5 -17   0   12.42   10.44
   5 -17   0   15.16   12.62
  -5  17  -1  774.35  146.24
   5  17   1  588.24   66.31
  -5  17  -1  539.27   55.98
   5  17   1  499.50   79.82
  -5 -17  -1  739.22   84.80
   5 -17   1  601.45  105.46
  -5 -17  -1  394.09   80.87
  -5  17  -2   49.68   23.66
   5  17   2   -0.18   23.42
   5  17   2  124.91   51.47
  -5 -17  -2   31.14   28.37
  -5 -17  -2   19.83    9.65
   5 -17   2    3.53    9.64
   5  17   3 3433.26  226.59
  -5  17  -3 3320.81  207.37
  -5 -17  -3 4032.25  263.11
   5 -17   3 3798.05  232.39
   5  17   4   49.78   27.74
  -5  17  -4   48.06   25.18
  -5 -17  -4    5.33   36.23
   5 -17   4    8.21   22.38
   5  17   5  924.76  132.01
  -5  17  -5  667.64  185.79
  -5 -17  -5  911.70  107.83
  -5 -17  -5  578.13   68.33
   5 -17   5  909.52   79.67
   5  17   6  222.47   62.99
  -5  17  -6  140.39   48.18
  -5 -17  -6  127.07   47.61
  -5 -17  -6   94.76   13.90
   5 -17   6  119.58   24.57
   5  17   7   57.24   13.88
  -5  17  -7   93.77   47.43
  -5 -17  -7  112.90   46.55
   5 -17   7  156.27   32.35
  -5  17  -8   80.35   30.05
  -5 -17  -8    2.97   47.78
   5 -17   8   27.27   13.07
  -5  17  -9   64.00   51.04
  -5 -17  -9   61.44   55.02
   5 -17   9   34.36   25.92
  -5  17 -10    1.89   49.60
  -5 -17 -10  -41.02   51.80
   5 -17  10   25.36   26.67
  -5  19  10   30.33   21.41
  -5 -19  10   11.83   24.29
  -5  19   9  149.99   32.90
  -5 -19   9  155.09   46.13
  -5  19   8  180.76   39.75
  -5 -19   8   93.38   37.50
  -5  19   7  -29.06   17.76
  -5 -19   7    8.92   24.80
  -5  19   6  291.20   40.83
  -5  19   5  457.14   58.81
  -5  19   4 1923.71  120.57
   5 -19  -4 1931.14  120.72
  -5  19   3   81.14   23.17
  -5  19   3   70.53   10.45
   5 -19  -3   86.68   17.28
   5  19  -2 2053.70  126.61
  -5  19   2 2514.68  156.83
   5  19  -2 2141.03  128.59
   5  19  -2 2222.58  180.72
   5 -19  -2 2306.83  139.67
  -5  19   1  106.25   27.48
   5  19  -1   82.36   19.71
   5  19  -1   22.74   37.63
  -5  19   1   80.87   17.65
  -5 -19   1  111.50   24.13
   5 -19  -1  114.63   28.27
  -5  19   0 1476.89   95.46
   5  19   0 1400.16   94.78
  -5  19   0 1339.51   85.82
   5  19   0 1283.67  178.71
  -5 -19   0 1673.91  115.04
   5 -19   0 1654.86  104.68
  -5 -19   0 1934.65  286.57
  -5  19  -1 1267.97   94.43
   5  19   1 1125.60  175.37
   5  19   1 1341.66  126.88
  -5 -19  -1 1624.71  117.20
  -5 -19  -1 1130.29   78.34
   5 -19   1 1383.01   89.68
  -5  19  -2  427.85   71.71
   5  19   2  351.61   51.06
   5  19   2  364.88   77.36
  -5 -19  -2  375.52  142.56
   5 -19   2  343.58   42.24
   5  19   3  318.61   55.45
  -5  19  -3  268.49   61.48
  -5 -19  -3  334.71  109.34
   5 -19   3  190.74   46.00
   5  19   4  506.17   79.50
  -5  19  -4  429.77   88.63
  -5 -19  -4  677.29  109.53
  -5 -19  -4  464.31  101.15
   5 -19   4  576.21   72.40
   5  19   5   68.76   32.63
  -5  19  -5   36.26   31.98
  -5 -19  -5  109.44   62.16
  -5 -19  -5    7.10    7.55
   5 -19   5   41.42   25.58
   5  19   6  805.15  250.61
  -5  19  -6  883.79  142.29
  -5 -19  -6 1239.27   86.29
   5 -19   6  779.98  156.49
  -5  19  -7   57.31   32.88
  -5 -19  -7   26.83   47.26
   5 -19   7    2.15   22.72
  -5  19  -8  292.00   70.14
  -5 -19  -8  174.46   63.39
   5 -19   8  282.33   32.67
  -5  19  -9   46.46   29.33
  -5 -19  -9   46.12   77.98
   5 -19   9   44.88   26.95
  -5  21  10   33.33   23.10
  -5 -21  10  -11.57   26.07
  -5  21   9   -6.90   20.56
  -5 -21   9   22.84   32.74
  -5  21   8   -2.49   22.24
  -5 -21   8   45.82   18.72
  -5  21   7   27.85   14.01
  -5 -21   7   84.00   38.18
  -5  21   6  431.72  144.35
  -5 -21   6  439.03   94.53
  -5  21   5   90.51   21.63
  -5  21   4    6.36   22.15
   5 -21  -4   52.75   12.51
  -5  21   3  859.96  155.16
   5 -21  -3 1190.38  107.90
   5  21  -2  626.89   63.60
  -5  21   2  524.44   87.26
   5  21  -2  544.81   56.17
   5  21  -2  514.41  102.06
  -5  21   2  518.01   55.16
   5 -21  -2  510.68   55.57
   5  21  -1   56.47   16.22
  -5  21   1   64.51   19.50
   5  21  -1   58.24   11.08
   5  21  -1  115.42   50.45
   5 -21  -1   61.76   16.60
  -5  21   0   27.07   21.01
   5  21   0  117.09   38.19
   5 -21   0   31.44    9.13
  -5  21  -1  575.97   86.81
   5  21   1  461.57   60.94
   5  21   1  821.73   98.71
  -5 -21  -1  574.89   74.89
  -5 -21  -1  546.38   65.46
   5 -21   1  574.35   67.34
   5  21   2  112.75   59.19
  -5  21  -2   48.85   17.52
  -5 -21  -2   29.13   26.24
  -5 -21  -2   27.79   10.12
   5 -21   2   37.69   21.65
   5  21   3  932.90  104.09
  -5  21  -3 1000.31   86.34
  -5 -21  -3 1250.35  131.75
   5 -21   3 1151.32   95.61
   5  21   4   15.90   31.42
  -5  21  -4   45.54   29.61
  -5 -21  -4   67.84   49.18
   5 -21   4  120.63   28.08
   5  21   5   74.57   36.38
  -5  21  -5  207.18   67.03
  -5 -21  -5  191.01   50.90
   5 -21   5  175.41   46.03
  -5 -21  -5  119.82   38.40
   5  21   6   39.05   36.31
  -5  21  -6   15.99   30.01
  -5 -21  -6    8.40   44.23
   5 -21   6    7.80   24.31
  -5  21  -7   86.34   37.08
  -5 -21  -7   73.65   57.89
   5 -21   7   71.13   28.36
  -5  21  -8   43.71   37.23
  -5 -21  -8  140.01   66.50
   5 -21   8   55.46   25.21
  -5  21  -9   76.86   70.40
  -5  23   9  110.30   37.44
  -5 -23   9   57.89   34.46
  -5  23   8  151.44   33.58
  -5 -23   8   76.77   32.99
  -5  23   7   66.44   35.04
  -5 -23   7   69.54   29.61
  -5  23   6   97.81   39.00
  -5 -23   6   31.01   34.06
  -5  23   5 1050.96  121.23
  -5  23   4   58.45   27.55
   5 -23  -4    1.48    5.31
   5 -23  -4   -0.84    4.07
   5  23  -3 2086.63  152.15
  -5  23   3 2303.62  175.16
   5 -23  -3 2758.85  204.18
   5  23  -2   27.08   13.25
  -5  23   2   59.81   25.35
   5  23  -2   34.56    7.87
   5 -23  -2   47.15   10.74
   5  23  -1  321.62   51.40
  -5  23   1  381.51  102.24
   5  23  -1  378.57   52.99
   5  23  -1  309.77   71.51
  -5  23   1  310.05   82.27
   5 -23  -1  441.78   62.91
  -5  23   0  120.03   18.48
   5  23   0  118.08   26.60
   5  23   0  307.13   76.83
  -5  23   0  147.01   20.56
  -5 -23   0  163.63   45.23
   5 -23   0  131.07   38.13
  -5  23  -1   34.41   14.65
   5  23   1   71.97   32.94
   5  23   1   68.08   42.43
  -5 -23  -1   18.82   17.76
   5 -23   1   14.21   11.80
   5  23   2  785.93  210.16
  -5  23  -2  813.55   71.51
  -5 -23  -2 1132.74  106.48
  -5 -23  -2  644.25  147.89
   5 -23   2  841.61   72.67
  -5  23  -3  193.18   44.26
  -5 -23  -3  195.66   68.76
   5 -23   3  116.53   18.37
   5  23   4   68.48   31.81
  -5  23  -4   25.57   10.50
  -5 -23  -4  -12.60   38.16
   5 -23   4   11.11   20.78
   5  23   5   40.40   35.09
  -5  23  -5   68.44   25.88
  -5 -23  -5   63.49   59.31
   5 -23   5    4.89   22.68
  -5  23  -6    0.75   38.62
  -5 -23  -6   64.98   68.90
   5 -23   6   31.88   32.30
  -5  23  -7  141.62   37.51
  -5 -23  -7  321.11   69.73
   5 -23   7  197.23  120.91
  -5 -23  -8   52.43   47.62
   5 -23   8   50.28   27.70
  -5  25   9   22.95   12.38
  -5 -25   9   28.65   23.11
  -5  25   8   44.14   24.71
  -5 -25   8   15.44   30.83
  -5  25   7  230.15   63.00
  -5 -25   7  275.96   41.29
  -5  25   6  452.43   63.94
  -5 -25   6  266.20   70.47
  -5  25   5  180.52   46.14
  -5 -25   5  223.59   45.61
  -5  25   4  980.85  113.35
   5  25  -3    8.16    4.86
   5  25  -3    3.92    3.28
  -5  25   3   -9.85   16.53
   5 -25  -3   10.94    5.42
   5  25  -2 1737.22  168.93
   5  25  -2 1649.64  151.58
  -5  25   2 1984.34  186.66
   5 -25  -2 1821.51  167.98
   5  25  -1  140.67   35.43
  -5  25   1  189.15   41.72
   5  25  -1  181.04   34.47
  -5  25   1  118.09   39.06
   5 -25  -1  183.84   61.10
   5  25   0   19.89   11.73
  -5  25   0   33.33   12.87
   5  25   0  -52.81   47.71
  -5  25   0   32.64   19.61
   5 -25   0    4.81   13.66
  -5  25  -1  174.59   26.42
   5  25   1   81.72   39.62
  -5 -25  -1  150.95   47.60
   5 -25   1  172.83   64.48
   5  25   2  731.46  238.41
  -5  25  -2  822.19   86.13
  -5 -25  -2  479.49  191.62
   5 -25   2  569.12   61.02
   5  25   3   47.17   32.37
  -5  25  -3   58.40   18.30
  -5 -25  -3  179.29   62.61
  -5 -25  -3   41.65   14.64
   5 -25   3   43.62   26.54
   5  25   4  418.16   64.86
  -5  25  -4  408.01  129.40
  -5 -25  -4  442.55   73.99
   5 -25   4  392.88   58.92
   5  25   5   34.73   36.56
  -5  25  -5   51.88   29.17
  -5 -25  -5   28.57   43.62
   5 -25   5   38.67   23.03
  -5  25  -6  726.06   85.04
  -5 -25  -6  295.67   63.99
   5 -25   6  430.69   61.53
  -5  25  -7   82.92   32.97
  -5 -25  -7  104.32   54.11
   5 -25   7   70.96   23.89
  -5  25  -8  201.01   68.82
  -5 -25  -8  162.20   79.69
   5 -25   8  230.41   76.39
  -5  27   8  100.08   29.21
  -5 -27   8   69.11   44.56
  -5  27   7  190.26   66.18
  -5 -27   7  180.14   35.00
  -5  27   6   50.74   20.59
  -5 -27   6   39.71   13.94
  -5  27   5  222.68   63.88
  -5 -27   5  194.74   53.32
  -5  27   4   22.25   12.24
   5  27  -3   79.20   19.13
  -5  27   3   70.59    9.57
   5 -27  -3   45.59   11.53
  -5  27   2   34.06   13.94
   5 -27  -2   33.19   11.58
   5  27  -1  287.64  110.05
  -5  27   1  633.15  127.75
   5  27  -1  582.18   66.46
   5 -27  -1  487.41   68.35
   5  27   0  136.58   46.16
  -5  27   0  236.21   68.58
   5  27   0  218.19   34.52
   5 -27   0  143.49   43.74
  -5  27  -1   24.21   13.12
   5  27   1   30.85   19.66
   5  27   1   -1.64   47.56
   5 -27   1   35.94   12.80
   5  27   2   24.25   38.17
  -5  27  -2   19.54   17.93
  -5 -27  -2   52.97   29.61
   5 -27   2   33.51   17.42
  -5  27  -3   48.18   19.71
   5  27   3  -36.94   41.21
   5 -27   3   29.79   19.35
  -5  27  -4    5.94    8.58
  -5 -27  -4   62.94   29.67
   5 -27   4   52.02   27.12
  -5  27  -5   86.94   36.88
  -5 -27  -5   78.54   49.08
   5 -27   5  117.50   31.64
  -5  27  -6   15.85   20.69
  -5 -27  -6   33.07   53.52
   5 -27   6   22.33   21.88
  -5  27  -7   52.12   35.26
  -5 -27  -7   71.92   53.90
   5 -27   7   13.61   27.35
  -5  29   8   65.15   34.55
  -5 -29   8   -9.84   30.44
  -5  29   7   26.16   13.79
  -5 -29   7   23.27   34.00
  -5  29   6   19.58   21.11
  -5 -29   6    9.99   27.62
  -5  29   5   58.39   13.12
  -5 -29   5   73.77   38.46
  -5  29   4  171.31   57.07
  -5 -29   4  228.75   43.27
  -5  29   3  527.07  131.74
  -5  29   2   71.42   15.87
   5  29  -2   31.26   20.98
   5 -29  -2   15.98    8.63
  -5  29   1   64.94   19.53
   5  29  -1   50.15   11.02
   5 -29  -1   68.73   17.11
  -5  29   0   33.32   19.31
   5  29   0   15.52   10.25
   5 -29   0   20.91    9.00
  -5  29  -1   81.59   20.88
   5  29   1   72.48   34.89
   5 -29   1   52.65   20.99
  -5  29  -2   35.18   15.13
  -5 -29  -2   44.76   33.77
   5 -29   2   34.12   26.84
   5  29   3   25.95   43.85
  -5  29  -3   -6.00   20.86
  -5 -29  -3  -25.81   32.20
   5 -29   3   39.27   23.36
   5  29   4   53.81   39.99
  -5  29  -4   -1.50   23.01
  -5 -29  -4  118.23   57.15
   5 -29   4    6.21   11.20
  -5  29  -5   74.21   30.14
  -5 -29  -5   44.19   50.39
   5 -29   5   20.58   14.22
  -5 -29  -6   66.33   52.19
   5 -29   6   72.53   44.84
  -5  29  -7   69.04   23.62
  -5 -29  -7   19.32   55.16
   5 -29   7   48.88   25.97
  -5  31   7   33.36   22.54
  -5 -31   7   -7.13   30.40
  -5  31   6  220.03   56.18
  -5 -31   6  124.75   37.48
  -5  31   5   37.64   19.79
  -5 -31   5   30.67   31.85
  -5  31   4   35.39   15.53
  -5 -31   4   54.38   27.84
  -5  31   3  180.25   35.28
  -5 -31   3  127.80   42.30
  -5  31   2  111.94   86.90
   5 -31  -2  356.46   32.55
  -5  31   1   29.64   22.68
   5  31  -1   16.81    9.26
   5 -31  -1   21.35    5.96
  -5  31   0  353.31   91.60
   5  31   0  295.90   82.88
   5 -31   0  239.41   85.11
  -5  31  -1   65.36   23.77
   5  31   1  105.04   20.37
   5 -31   1   78.55   24.31
  -5  31  -2   40.07   13.29
   5  31   2   25.06   22.25
   5 -31   2   46.60   21.04
  -5  31  -3    7.26   13.01
  -5 -31  -3  -19.15   37.04
   5 -31   3   22.02   19.08
  -5  31  -4  528.77   42.53
  -5 -31  -4  353.27  292.18
   5 -31   4  457.80  143.28
  -5 -31  -5   59.52   49.75
   5 -31   5    9.94   25.28
  -5 -31  -6   89.95   51.96
   5 -31   6  169.96   79.20
  -5  33   6   39.78   18.60
  -5 -33   6   70.16   37.64
  -5  33   5  220.77   64.50
  -5 -33   5  128.01   77.96
  -5  33   4   45.55   17.21
  -5 -33   4   46.63   28.57
  -5  33   3  194.08   46.48
  -5 -33   3  234.39   52.76
  -5  33   2  134.03   53.44
  -5 -33   2  197.38   42.30
  -5  33   1  327.24   70.25
   5 -33  -1  271.50   62.26
  -5  33   0  241.31   91.32
   5  33   0  247.98   62.92
   5 -33   0  290.15   73.18
  -5  33  -1   43.84   20.07
   5  33   1   79.21   21.93
   5 -33   1  102.54   27.35
  -5  33  -2   -1.17   23.85
   5  33   2   46.28   22.08
   5 -33   2   24.62   19.18
  -5  33  -3  145.66   60.62
   5  33   3  137.28   47.19
   5 -33   3   65.71   55.78
  -5  33  -4   -6.45   24.75
  -5 -33  -5   12.83   47.25
  -5  35   5   92.72   32.71
  -5 -35   5  108.98   37.94
  -5  35   4  132.72   34.09
  -5  35   3   20.56   15.38
  -5 -35   3   -2.81   26.06
  -5  35   2   18.04   12.09
  -5 -35   2  -14.64   23.86
  -5  35   1   25.59   13.11
  -5 -35   1   40.67   24.26
  -5  35   0  117.31   33.68
  -5  35  -1  -18.95   23.76
   5  35   1    1.21    8.60
   5 -35   1   50.31   23.53
  -5 -35  -1   71.76   31.50
  -5  35  -2  149.62   34.55
   5  35   2   99.50   36.65
  -5  35  -3   22.02   18.66
   5  35   3   22.05   13.03
   5 -35   3   51.77   25.73
   5 -35   4   48.56   26.35
  -5  37   3   49.90   37.66
  -5 -37   3   42.97   31.11
  -5  37   2   21.09   20.39
  -5 -37   1   46.18   24.93
  -5  37   0   -5.13   17.28
  -5  37  -1   40.90   19.57
  -5  37  -2  156.07   46.03
   5 -37   2   44.71   28.44
  -6   0  11   -5.58   16.51
  -6   0  11   30.74   28.40
  -6   0  10  582.87   72.10
  -6   0   9    7.04   10.76
  -6   0   8  105.38   36.20
  -6   0   8   75.47   13.81
  -6   0   7    2.84   22.40
  -6   0   7   11.25    7.58
  -6   0   6  966.94   68.02
   6   0  -6 1078.42  103.80
  -6   0   6  989.45   87.61
  -6   0   5    9.43   18.78
  -6   0   5   11.54    5.49
   6   0  -5  102.80   28.18
  -6   0   5    8.94   28.41
  -6   0   4 7508.51  306.17
  -6   0   4 7819.27  307.66
   6   0  -4 7486.26  390.48
  -6   0   3   20.48   13.22
   6   0  -3   12.59    7.98
   6   0  -3   29.18   32.53
  -6   0   3   16.17   16.53
  -6   0   2  233.99   53.58
   6   0  -2  154.93   17.27
   6   0  -2  151.30   34.76
  -6   0   2  174.52   33.56
  -6   0   1   14.75   20.65
   6   0  -1   11.87    7.77
  -6   0   1    8.74   19.09
   6   0  -1   62.09   24.88
   6   0   0 1673.63   59.24
  -6   0   0 1201.61   97.62
   6   0   0 1371.91   68.54
  -6   0   0 1453.53   54.51
  -6   0  -1   13.49   28.52
   6   0   1   27.30   15.87
   6   0   1   -2.06   21.13
  -6   0  -1   17.84   13.62
  -6   0  -2 9885.46  425.52
   6   0   2 8400.50  367.36
   6   0   2 9118.40  383.09
  -6   0  -210079.02  421.77
  -6   0  -3  -12.40   32.18
   6   0   3   15.61   17.59
   6   0   3    2.05   15.96
  -6   0  -3   17.08   10.24
  -6   0  -4  984.06  136.51
   6   0   4  814.43   97.18
  -6   0  -4  691.11   68.36
  -6   0  -5   51.94   38.84
   6   0   5  -13.08   17.06
  -6   0  -6 2430.03  236.03
   6   0   6 2381.27  215.33
  -6   0  -7   87.90   66.31
   6   0   7  -10.00   19.23
  -6   0  -8 2096.16  113.01
   6   0   8 1917.01   63.07
  -6   0  -9   54.71   58.27
   6   0   9   22.60   15.06
  -6   0 -10   55.43   73.09
   6   0  10  118.18   32.83
  -6  -2  11    2.91   19.98
  -6  -2  10  134.41   49.40
  -6  -2  10  122.50   25.95
  -6   2   9 1124.41   40.84
  -6   2   9 1076.04   45.40
  -6  -2   9 1160.28   38.76
  -6  -2   9 1020.29   44.94
  -6   2   8   43.61   16.11
  -6  -2   8   18.98   17.11
  -6   2   7 1164.92  106.60
  -6  -2   7 1049.74   95.26
  -6  -2   7  749.76  174.00
  -6   2   6  258.29   61.33
  -6   2   6  228.29   44.10
  -6   2   6  218.79   63.80
   6   2  -6  346.41   63.53
  -6  -2   6  280.70   58.63
  -6  -2   6  215.23   35.26
   6  -2  -6  396.36   73.96
  -6  -2   6  227.47   58.66
  -6   2   5  209.96   49.96
   6   2  -5  242.66   85.27
  -6   2   5  269.32   17.48
  -6   2   5  289.93   47.34
  -6  -2   5  245.21   13.44
  -6  -2   5  297.42   61.59
   6  -2  -5  387.06   89.77
  -6  -2   5  236.50   61.04
  -6   2   4 3104.52  138.92
   6   2  -4 3754.43  199.53
  -6   2   4 3210.41  129.69
  -6  -2   4 3451.18  140.28
   6  -2  -4 3686.93  185.73
  -6  -2   4 3327.96  145.90
  -6  -2   4 4292.73  198.82
  -6   2   3 6353.13  273.03
   6   2  -3 5208.81  244.04
   6   2  -3 5814.01  243.35
  -6   2   3 6630.47  284.45
   6  -2  -3 6329.23  265.01
  -6  -2   3 5859.38  243.88
   6  -2  -3 6119.00  279.59
  -6   2   2   46.91    9.90
   6   2  -2   39.31    8.80
  -6   2   2   23.70   15.97
   6   2  -2   10.23   35.62
  -6  -2   2   50.16   12.02
   6  -2  -2   41.65    8.66
   6  -2  -2  -31.11   39.96
  -6  -2   2   40.78   18.20
  -6   2   1  973.68   70.48
   6   2  -1  902.68   40.24
   6   2  -1 1275.93  139.87
  -6   2   1  827.97   41.68
   6  -2  -1  833.76   38.30
  -6  -2   1  873.19   62.14
   6  -2  -1  830.92   99.63
  -6  -2   1 1029.12   55.53
  -6   2   0   49.40   12.95
   6   2   0   27.74   10.55
  -6   2   0   30.41   13.54
   6   2   0   50.69   15.38
  -6  -2   0    8.34   12.21
   6  -2   0   19.82   17.20
  -6  -2   0   13.63   12.66
   6  -2   0   14.41    5.95
  -6   2  -1 6050.34  268.70
   6   2   1 5924.60  259.26
   6   2   1 4410.15  190.24
  -6   2  -1 5277.93  225.17
  -6  -2  -1 4752.90  212.79
   6  -2   1 4476.09  193.46
  -6  -2  -1 5271.21  224.72
   6   2   2  842.88   82.54
  -6   2  -2  627.57   96.36
   6   2   2  477.87   41.22
  -6   2  -2  671.07   87.19
   6  -2   2  585.32   48.40
  -6  -2  -2  674.04  107.61
   6  -2   2  621.28   50.55
  -6  -2  -2  480.49   40.23
   6   2   3  270.05   33.31
  -6   2  -3  222.65   43.58
  -6   2  -3  146.60   22.89
   6   2   3  211.58   34.49
  -6  -2  -3  251.61   44.28
   6  -2   3  160.27   33.29
   6  -2   3  210.85   29.05
  -6  -2  -3  122.63   19.23
  -6   2  -4  -50.33   34.69
   6   2   4   67.22   20.72
  -6  -2  -4   28.05   43.92
   6  -2   4   67.24   20.92
  -6  -2  -4   11.94   13.15
  -6   2  -5  603.82   93.40
   6   2   5  571.47  121.95
   6  -2   5  511.21   65.31
  -6  -2  -5  760.37  102.64
  -6   2  -6   80.66   46.70
   6   2   6   78.08   24.45
  -6  -2  -6   51.39   43.20
   6  -2   6   39.68   19.89
  -6   2  -7  466.42   90.01
   6   2   7  470.93   53.51
  -6  -2  -7  521.68   82.71
   6  -2   7  425.53   37.48
  -6   2  -8   65.25   51.34
   6   2   8   29.40   13.59
  -6  -2  -8   57.47   45.72
   6  -2   8   92.85   21.11
   6   2   9   25.77   19.34
  -6   2  -9    9.52   44.16
  -6  -2  -9   11.59   57.54
   6  -2   9    6.21   19.77
  -6   2 -10   45.56   69.19
   6   2  10   27.86   17.60
  -6  -2 -10  117.52   58.40
  -6   4  11  251.13   65.67
  -6  -4  11  271.14   34.94
  -6  -4  10   -4.33   13.68
  -6  -4  10  -11.88   21.47
  -6   4   9   49.41   15.86
  -6   4   9  101.21   16.96
  -6  -4   9   54.48   18.91
  -6  -4   9   47.18   30.98
  -6   4   8  131.71   24.58
  -6   4   8  139.68   17.32
  -6   4   8   54.77   42.57
  -6  -4   8  136.34   19.12
  -6  -4   8   44.55   20.63
  -6   4   7  225.71   92.52
  -6   4   7  406.64   59.59
  -6   4   7  294.07   81.99
  -6  -4   7  351.51   56.61
  -6  -4   7  309.05   44.36
  -6   4   6   23.45   16.82
  -6   4   6   29.34   15.21
  -6  -4   6   20.82    9.67
   6  -4  -6   53.83   38.47
  -6  -4   6   47.40   18.32
  -6   4   5  526.42   62.98
   6   4  -5  387.64   97.04
  -6   4   5  511.37   79.96
  -6   4   5  365.36   74.52
  -6  -4   5  522.73   63.66
   6  -4  -5  616.58   84.01
  -6  -4   5  605.08  148.34
  -6  -4   5  489.28   52.02
  -6   4   4  140.15   80.36
  -6   4   4  255.23   35.14
   6   4  -4  157.87   55.64
  -6   4   4  172.44   25.18
  -6  -4   4  250.92   36.03
  -6  -4   4  258.90   23.09
   6  -4  -4  165.64   38.94
  -6  -4   4  282.53   81.14
   6   4  -3  118.19   46.35
  -6   4   3  109.94   33.15
   6   4  -3   71.02    8.74
  -6   4   3   96.06   23.66
  -6  -4   3  132.27   23.61
  -6  -4   3  119.58   22.68
   6  -4  -3   98.12   12.53
   6  -4  -3   59.87   33.87
   6   4  -2  477.86   71.37
   6   4  -2  503.09   36.08
  -6   4   2  436.75   34.78
   6  -4  -2  466.59   35.51
  -6  -4   2  410.79   42.80
  -6  -4   2  378.99   69.94
   6  -4  -2  372.82   64.68
   6   4  -1  252.61   42.79
  -6   4   1  297.08   22.97
   6   4  -1  232.80   14.29
  -6   4   1  309.20   63.71
  -6  -4   1  331.11   76.83
  -6  -4   1  331.58   65.15
   6  -4  -1  287.01   60.98
   6  -4  -1  226.09   16.32
  -6   4   0  641.06  108.17
   6   4   0  494.25   35.02
   6   4   0  455.21   56.79
  -6   4   0  484.38   59.94
  -6  -4   0  500.57   38.44
   6  -4   0  783.76   57.96
  -6  -4   0  730.44   93.25
   6  -4   0  588.78   34.64
   6   4   1 2166.34  105.50
  -6   4  -1 1798.80   86.42
   6   4   1 1852.12   87.17
  -6   4  -1 2419.01  108.64
  -6  -4  -1 1819.50   91.07
   6  -4   1 2689.63  136.53
   6  -4   1 2312.45  106.73
  -6  -4  -1 2159.69   97.86
   6   4   2  497.00   63.89
   6   4   2  450.80   41.89
  -6   4  -2  460.23   55.81
  -6   4  -2  402.14   48.43
  -6  -4  -2  445.91  112.69
  -6  -4  -2  375.12   32.49
   6  -4   2  457.70   89.68
   6  -4   2  482.34   88.46
   6   4   3  481.27   97.21
   6   4   3  270.34   61.11
  -6   4  -3  246.60   52.39
  -6   4  -3  275.36   46.96
   6  -4   3  257.70   23.57
   6  -4   3  430.60   47.46
  -6  -4  -3  292.13   42.60
  -6  -4  -3  305.94   50.38
  -6   4  -4  568.84   75.23
   6   4   4  496.68   94.83
  -6  -4  -4  306.71   50.45
   6  -4   4  531.60   91.28
  -6  -4  -4  568.77   58.22
  -6   4  -5  115.68   58.51
   6   4   5   30.09   13.93
   6  -4   5   44.80   12.32
  -6  -4  -5   82.43   43.51
   6   4   6  219.81   60.71
  -6   4  -6  257.93   61.38
  -6  -4  -6  196.77   51.89
   6  -4   6  279.19   45.57
  -6   4  -7  207.83   60.61
   6   4   7  294.00   36.66
   6  -4   7  173.53   38.07
  -6  -4  -7  160.70   63.24
   6   4   8   27.21   12.24
  -6   4  -8  -57.33   41.89
  -6  -4  -8  136.01   61.92
  -6   4  -9   18.60   49.63
   6   4   9   -7.37   17.73
  -6  -4  -9  107.23   54.45
   6  -4   9    7.64   20.01
   6   4  10   34.24   17.52
  -6   4 -10  179.08   64.65
  -6  -4 -10  154.66   85.01
   6  -4  10   93.96   29.78
  -6  -6  11   11.48   20.38
  -6   6  10   -6.24   13.93
  -6  -6  10    0.56   24.03
  -6   6   9   34.11   12.39
  -6   6   9   25.87   12.97
  -6  -6   9   29.42   13.19
  -6  -6   9  108.99   26.40
  -6   6   8  285.98   70.74
  -6   6   8  214.43   87.34
  -6   6   8  327.09   36.89
  -6  -6   8  304.60   63.78
  -6  -6   8  156.63   50.99
  -6   6   7   80.93   14.59
  -6  -6   7   57.04   15.34
  -6  -6   7   75.24   21.61
  -6   6   6  732.00   76.00
  -6   6   6  907.11   60.96
  -6  -6   6  909.53   60.55
   6  -6  -6  934.30   85.91
  -6  -6   6  874.00   34.59
  -6   6   5   19.07   26.42
   6   6  -5   27.44   53.11
  -6   6   5   34.65    9.10
  -6   6   5   -6.65   11.36
  -6  -6   5    8.11    3.41
   6  -6  -5   37.27   35.06
  -6  -6   5   -4.10   34.04
  -6  -6   5   18.19   11.18
   6   6  -4  107.49   56.43
  -6   6   4   36.46   15.25
  -6   6   4   19.36   15.22
  -6   6   4    0.87   11.65
  -6  -6   4   -0.26    3.72
  -6  -6   4   31.42   15.41
   6  -6  -4   -8.99   24.42
  -6  -6   4   27.45   31.92
   6   6  -3   67.38   47.74
  -6   6   3   35.17   10.63
   6   6  -3   46.99    7.45
  -6   6   3   48.07    8.59
   6  -6  -3   70.10   14.83
  -6  -6   3   37.58    8.27
   6  -6  -3   37.09   28.23
  -6  -6   3   77.54   37.75
   6   6  -212464.68  544.26
   6   6  -213961.75  484.47
  -6   6   213834.27  485.73
  -6   6   213844.71  483.76
   6  -6  -213679.46  566.20
   6  -6  -211930.01  501.25
  -6  -6   215192.18  532.32
   6   6  -1  664.66  113.82
   6   6  -1  655.98   48.03
  -6   6   1  573.12   51.22
  -6   6   1  533.55   40.86
   6  -6  -1  727.36   85.98
  -6  -6   1  638.81   51.95
  -6  -6   1  636.43  102.55
   6  -6  -1  794.51   64.38
  -6   6   0 3877.16  171.22
  -6   6   0 3386.03  147.11
   6   6   0 4457.82  221.24
  -6  -6   0 4117.03  184.10
   6  -6   0 3152.45  146.10
   6  -6   0 3625.67  155.59
   6   6   1   66.89   17.34
   6   6   1   77.82   16.78
  -6   6  -1   -3.76   17.90
  -6   6  -1   89.83   16.62
  -6  -6  -1   43.68   22.98
   6  -6   1   55.30   17.27
  -6  -6  -1   63.31   11.25
   6  -6   1   77.67   15.38
   6   6   2 3097.16  141.32
  -6   6  -2 3641.18  163.02
   6   6   2 3008.00  153.00
   6  -6   2 3541.09  149.69
  -6  -6  -2 2965.14  144.71
   6  -6   2 3141.20  135.22
  -6  -6  -2 2956.64  123.96
   6   6   3 1712.98  139.64
  -6   6  -3 1295.00   91.69
   6   6   3 1467.34  137.94
  -6   6  -3 1399.71   86.08
   6  -6   3 1211.50  139.04
   6  -6   3 1475.77  100.68
  -6  -6  -3 1384.99  107.60
   6   6   412354.13 1650.01
  -6   6  -4 9571.54  341.82
  -6  -6  -4 9227.35  349.50
   6  -6   410159.45 1347.91
  -6   6  -5 1274.41  104.96
   6   6   5 1245.00  100.69
  -6  -6  -5 1130.43  105.82
   6  -6   5 1598.03  105.26
  -6   6  -6 2403.29  201.08
   6   6   6 2420.15  183.40
  -6  -6  -6 2197.36  185.35
   6  -6   6 2434.31  188.75
   6   6   7  108.34   19.49
  -6   6  -7   71.28   59.39
  -6  -6  -7  107.19   59.15
   6  -6   7   81.86   19.54
   6   6   8  593.57   77.74
  -6   6  -8  691.51  115.30
  -6  -6  -8  787.90  127.58
   6  -6   8  761.32  112.15
   6   6   9   -5.69   18.58
  -6   6  -9    0.20   43.97
  -6  -6  -9   97.84   63.26
   6  -6   9   39.44   16.58
  -6   6 -10  435.21  122.96
  -6  -6 -10  520.26   98.00
   6  -6  10  229.96  104.22
  -6   8  11  212.72   50.93
  -6  -8  11  120.09   85.26
  -6   8  10   42.05   27.39
  -6  -8  10  -14.31   23.59
  -6   8   9   49.47   15.55
  -6  -8   9  105.65   45.49
  -6   8   8  538.74   67.83
  -6   8   8  472.23   90.31
  -6   8   8  212.92   67.89
  -6  -8   8  225.55   38.41
  -6  -8   8  435.11   95.77
  -6  -8   8  391.75   64.37
  -6   8   7 2413.01  182.77
  -6  -8   7 2433.50  178.19
  -6  -8   7 2493.03  187.53
  -6   8   6  131.85   22.62
  -6   8   6  107.46   19.05
  -6  -8   6  124.18   20.44
   6  -8  -6   34.09   28.34
  -6  -8   6  122.90   22.76
  -6   8   5 1596.46   96.06
   6   8  -5 1515.89  133.29
  -6   8   5 1949.09   76.09
  -6  -8   5 1692.19   56.74
   6  -8  -5 1835.69   96.93
  -6  -8   5 1658.50   61.69
  -6   8   4   27.80   11.28
  -6   8   4   12.33   17.04
  -6   8   4   10.42    7.47
   6   8  -4    4.75   22.64
  -6  -8   4    4.97    5.36
   6  -8  -4   25.64   23.20
  -6  -8   4    5.65    4.06
   6   8  -3   74.26   50.90
  -6   8   3  105.07   21.66
   6   8  -3   72.51    8.58
  -6   8   3   71.62   17.38
  -6  -8   3   61.43   14.71
   6  -8  -3  126.69   35.94
  -6  -8   3   66.17   48.34
   6  -8  -3   76.08   11.32
  -6   8   2  312.37   49.12
   6   8  -2  263.63   20.61
  -6   8   2  311.81   27.87
   6   8  -2  322.65   54.42
  -6  -8   2  310.82   39.43
  -6  -8   2  359.59   58.46
   6  -8  -2  271.51   57.49
   6  -8  -2  263.99   35.48
   6   8  -110096.88  446.01
   6   8  -110510.25  435.47
  -6   8   110203.77  425.42
  -6   8   110413.90  432.72
   6  -8  -111073.71  459.81
  -6  -8   1 9250.37  393.57
  -6  -8   111927.66  502.37
  -6   8   0 2439.33  108.76
  -6   8   0 2812.04  129.03
   6   8   0 3503.75  297.72
  -6  -8   0 2616.11  127.51
  -6  -8   0 2271.20  114.69
   6  -8   0 2732.27  124.36
   6  -8   0 2671.61  117.74
   6   8   1   38.41   22.99
   6   8   1   45.15   18.25
  -6   8  -1   83.24   18.27
  -6   8  -1  109.53   15.52
  -6  -8  -1  148.25   26.60
   6  -8   1  105.91   26.52
  -6  -8  -1  100.03   16.82
   6  -8   1   95.56   20.14
   6   8   2   45.77   19.07
   6   8   2   35.67   18.94
  -6   8  -2   65.96   27.32
  -6   8  -2   53.22   12.15
  -6  -8  -2   62.39   37.02
   6  -8   2   39.75   16.22
  -6  -8  -2   30.26    8.47
   6  -8   2   34.99    8.79
   6   8   3   58.43   18.23
  -6   8  -3   -2.95   33.28
   6   8   3   11.76   14.16
  -6   8  -3   23.22   19.49
  -6  -8  -3   51.10   29.26
   6  -8   3   41.95   21.34
  -6  -8  -3   19.41    7.19
   6  -8   3   38.64   15.77
   6   8   4   79.43   35.75
  -6   8  -4  136.27   34.90
  -6  -8  -4   50.09   39.67
  -6  -8  -4   36.11   11.02
   6  -8   4   76.76   20.39
   6   8   5  780.69   77.13
  -6   8  -5  466.98   64.86
  -6  -8  -5  641.19   69.09
   6  -8   5  608.07  139.35
   6   8   6   10.16   12.42
  -6   8  -6   40.02   26.85
  -6  -8  -6   52.37   50.81
   6  -8   6   27.53   23.71
   6   8   7   72.47   16.76
  -6   8  -7   68.51   48.25
  -6  -8  -7  101.86   58.61
   6  -8   7   80.22   18.58
   6   8   8   49.23   16.46
  -6   8  -8  170.85   51.99
  -6  -8  -8   81.95   53.66
   6  -8   8   70.14   24.21
   6   8   9  216.63   29.48
  -6   8  -9  373.88   69.98
  -6  -8  -9  248.87   66.61
   6  -8   9  314.02  104.43
   6   8  10   14.99    9.90
  -6   8 -10   -0.63   53.25
  -6  -8 -10  147.90   70.07
   6  -8  10   40.31   22.77
  -6  10  11   49.11   25.88
  -6 -10  11   15.38   15.00
  -6  10  10   32.17   20.21
  -6 -10  10   85.59   25.90
  -6  10   9  360.50   48.26
  -6  10   9  314.45   21.17
  -6 -10   9  331.52   86.99
  -6  10   8  194.77   52.32
  -6  10   8  229.81   49.76
  -6 -10   8  222.13   43.33
  -6 -10   8  207.33   56.63
  -6  10   7  686.10   83.26
  -6  10   7  588.18   81.70
  -6 -10   7  564.60   80.30
  -6 -10   7  658.33   76.86
  -6  10   6  784.63   59.32
  -6  10   6  958.34   81.61
  -6 -10   6  847.02   55.26
   6 -10  -6  699.71   55.64
  -6  10   5  691.03   87.18
  -6  10   5  760.38   72.58
   6  10  -5  737.48  112.25
   6 -10  -5  815.11   92.24
  -6  10   4   26.13   12.93
  -6  10   4   51.65    9.67
   6  10  -4  150.58   55.92
  -6  10   4   43.18   10.34
   6 -10  -4   60.43   18.49
   6  10  -3  658.61   79.80
  -6  10   3  585.39   34.56
  -6  10   3  544.96   23.69
  -6 -10   3  548.64   15.43
  -6 -10   3  545.67   16.66
  -6 -10   3  547.04   60.01
   6 -10  -3  431.83   70.47
   6 -10  -3  641.05   69.95
   6  10  -2 1311.18  114.20
  -6  10   2 1041.22   50.49
   6  10  -2  915.56   37.93
  -6  10   2  907.27   54.59
  -6 -10   2 1029.66   67.50
  -6 -10   2 1023.58  222.15
   6 -10  -2 1185.41   61.00
   6 -10  -2  989.46   47.37
   6  10  -1 2100.31  121.87
   6  10  -1 1878.36   79.95
  -6  10   1 1962.88   85.12
  -6  10   1 2237.09   94.35
  -6 -10   1 2039.28   93.06
  -6 -10   1 1628.22   79.81
   6 -10  -1 1833.78  101.99
   6 -10  -1 2104.09   90.69
   6  10   011944.78  115.43
  -6  10   010444.53  408.14
   6  10   011138.97  466.69
  -6 -10   011148.01  461.18
   6 -10   011198.06  438.48
   6 -10   011394.68   89.80
   6  10   1  159.81   42.85
   6  10   1   99.86   30.84
  -6  10  -1  119.67   24.59
  -6  10  -1  103.12   20.24
  -6 -10  -1  116.44   31.88
  -6 -10  -1  102.75   27.00
   6 -10   1  122.11   21.46
   6 -10   1   70.56   11.55
   6  10   2  -29.41   21.87
   6  10   2   -3.66   19.34
  -6  10  -2   19.32   22.20
  -6  10  -2   16.65   16.13
  -6 -10  -2  122.89   48.43
   6 -10   2   20.24   16.71
  -6 -10  -2   26.59   12.62
   6 -10   2   10.94   12.61
  -6  10  -3   26.67   25.18
   6  10   3  -12.79   22.45
   6  10   3   25.19   19.15
  -6 -10  -3   48.59   34.82
  -6 -10  -3   20.54   12.43
   6 -10   3   10.08   16.03
   6  10   4  504.89   57.41
  -6  10  -4  686.17  114.29
  -6 -10  -4  553.88   77.92
   6 -10   4  524.35   97.71
  -6 -10  -4  454.44   80.77
   6  10   5 2754.65  249.10
  -6  10  -5 2548.09  239.28
  -6 -10  -5 2324.16  226.31
  -6 -10  -5 2051.00  183.56
   6 -10   5 2446.57  221.21
   6  10   6   23.42   13.70
  -6  10  -6   88.24   39.60
  -6 -10  -6   -6.26   54.04
   6 -10   6   46.18   32.43
   6  10   7   36.00   20.86
  -6  10  -7   81.24   54.79
  -6 -10  -7   37.62   28.69
   6 -10   7   39.22   10.77
   6  10   8   50.01   18.45
  -6  10  -8   76.18   51.64
  -6 -10  -8   64.01   46.60
   6 -10   8   95.87   30.45
  -6 -10  -9  154.40   51.00
   6 -10   9   67.80   24.96
   6  10  10   84.67   28.10
  -6  10 -10  133.16   64.18
  -6 -10 -10   48.14   67.81
   6 -10  10   40.99   17.20
  -6  12  11   16.95   11.20
  -6 -12  11   85.59   32.61
  -6  12  10  306.81   29.84
  -6 -12  10  390.82   51.89
  -6  12   9   33.42   16.72
  -6 -12   9   16.67   26.18
  -6  12   8  158.62   28.71
  -6  12   8  112.26   27.50
  -6 -12   8  109.20   17.80
  -6 -12   8  140.23   39.18
  -6  12   7   31.66   23.69
  -6  12   7    5.11    4.01
  -6  12   7   20.89   11.97
  -6  12   6   71.32   16.40
  -6  12   6   30.60    8.39
  -6  12   5  613.09   64.51
  -6  12   5  649.60   62.58
   6  12  -5  169.82   70.36
   6 -12  -5  501.04  117.72
  -6  12   4 1538.08   63.86
   6  12  -4 1517.70  384.85
  -6  12   4 1601.35   62.75
   6 -12  -4 1487.89   76.32
  -6  12   3  654.33   26.66
  -6  12   3  624.68   22.25
   6  12  -3  775.78  162.33
   6 -12  -3  552.97   64.66
   6  12  -2   69.25   33.78
   6  12  -2    4.91    4.04
  -6  12   2   19.40   13.69
  -6  12   2   11.69    5.70
  -6 -12   2   23.18   14.63
  -6 -12   2   60.95   49.01
   6 -12  -2   20.81   10.84
   6 -12  -2    4.38    7.73
   6  12  -1  306.11   63.83
   6  12  -1  230.56   21.85
  -6  12   1  266.57   25.52
   6 -12  -1  302.39   23.71
  -6 -12   1  302.72   57.84
  -6 -12   1  220.90   52.42
   6 -12  -1  273.72   45.93
  -6  12   0 1665.28   73.38
   6  12   0 1733.95   87.59
   6  12   0 1708.43  112.83
  -6 -12   0 1523.34   91.79
  -6 -12   0 1468.29   76.29
   6 -12   0 1719.10   77.52
   6 -12   0 1743.09   76.51
   6  12   1  359.90  122.77
   6  12   1  292.03   27.33
  -6  12  -1  371.29   62.81
  -6  12  -1  279.21   30.76
   6 -12   1  299.88   54.19
   6 -12   1  349.35   67.94
  -6 -12  -1  280.17   32.37
  -6  12  -2 2600.48  110.63
   6  12   2 2630.88  108.77
   6  12   2 3466.05  154.32
  -6  12  -2 3177.12  118.20
  -6 -12  -2 2936.76  189.87
   6 -12   2 3073.21  116.52
  -6  12  -3  873.08  168.78
   6  12   3 1030.99  100.33
   6  12   3 1041.48   93.11
  -6 -12  -3 1266.93  105.03
   6 -12   3 1254.93   62.65
   6  12   4   51.89   23.16
  -6  12  -4   73.62   22.41
  -6 -12  -4   81.45   41.38
  -6 -12  -4   66.14   16.01
   6 -12   4   68.36   27.38
   6  12   5   60.85   24.13
  -6  12  -5   85.52   36.65
  -6 -12  -5  112.48   45.94
  -6 -12  -5  115.66   18.50
   6 -12   5  102.37   24.84
   6  12   6  180.47   46.77
  -6  12  -6  196.89   72.81
  -6 -12  -6  201.48   60.19
   6 -12   6  190.84   60.30
   6  12   7  128.81   51.03
  -6  12  -7  250.36   77.60
  -6 -12  -7  374.19   74.28
   6 -12   7  209.53   79.53
   6  12   8  307.75   82.57
  -6  12  -8  226.72  102.47
  -6 -12  -8  319.62   64.41
   6 -12   8  258.55  105.63
   6  12   9   12.68   14.27
  -6  12  -9  -52.24   50.52
  -6 -12  -9    2.20   55.29
   6 -12   9   33.35   13.74
  -6  12 -10   39.28   35.25
  -6 -12 -10   23.87   55.43
   6 -12  10   45.76   22.59
  -6 -14  11  133.94   68.29
  -6  14  10   32.87   16.88
  -6 -14  10   71.01   37.83
  -6  14   9  810.05   72.82
  -6 -14   9  704.16  109.05
  -6  14   8 1251.72   52.84
  -6 -14   8 1065.75   58.08
  -6  14   7   20.00   25.54
  -6  14   7    2.57    5.42
  -6  14   6  237.91   61.88
  -6  14   6  205.53   44.89
  -6  14   5  942.77   64.81
  -6  14   5  932.83   57.19
   6 -14  -5  986.52   77.04
  -6  14   4   91.76   30.45
   6  14  -4   92.04   57.25
  -6  14   4   89.86   22.03
   6 -14  -4  104.44   35.05
  -6  14   3 3564.43  128.33
   6  14  -3 3436.51  179.29
  -6  14   3 3387.81  119.63
   6 -14  -3 2727.47  101.37
  -6  14   2  759.16   74.52
   6  14  -2  676.82   61.88
   6  14  -2  933.12  167.72
  -6  14   2  587.51   56.44
  -6 -14   2  639.96   62.62
   6 -14  -2  929.11  128.34
   6  14  -1 1864.69  359.29
  -6  14   1 1984.04  117.68
  -6  14   1 1822.98  105.70
  -6 -14   1 1836.60  111.87
   6 -14  -1 1746.21  106.36
  -6 -14   1 1366.61  131.74
  -6  14   0   23.36   15.06
   6  14   0   -3.41   14.44
   6  14   0   82.27   42.16
  -6 -14   0   29.69   19.90
  -6 -14   0   44.54    9.46
   6 -14   0   16.35   16.06
  -6  14  -1 3737.35  160.44
   6  14   1 3259.72  124.94
   6  14   1 3524.75  161.83
  -6 -14  -1 3784.39  151.25
  -6 -14  -1 3860.43  143.91
   6 -14   1 3743.73  134.55
  -6  14  -2  231.76   55.65
   6  14   2  156.17   24.00
   6  14   2  217.55   46.85
  -6 -14  -2  144.00   39.32
  -6 -14  -2  124.26   15.44
   6 -14   2  181.11   48.08
   6  14   3 1861.99  204.06
  -6  14  -3 1277.43   89.65
  -6 -14  -3 1588.06  125.29
  -6 -14  -3 1581.93  100.60
   6 -14   3 1485.83   98.27
   6  14   4    7.47   13.66
  -6  14  -4   35.55   29.86
  -6 -14  -4   42.12   40.70
  -6 -14  -4   38.41   15.36
   6 -14   4   50.54   19.25
   6  14   5   60.73   29.25
  -6  14  -5   38.56   46.70
  -6 -14  -5   51.82   48.39
   6 -14   5  109.30   30.18
   6  14   6  182.17   38.15
  -6  14  -6  289.58   59.51
  -6 -14  -6  204.94   61.54
   6 -14   6  257.45   64.36
   6  14   7  739.80  118.84
  -6  14  -7  973.20  256.80
  -6 -14  -7  856.38  128.00
   6 -14   7 1031.13  125.20
   6  14   8   33.59   10.88
  -6  14  -8    3.16   42.08
  -6 -14  -8  109.25   53.00
   6 -14   8   44.23   27.05
   6  14   9  212.23   33.01
  -6  14  -9  397.62   74.21
  -6 -14  -9  334.06   68.88
   6 -14   9  159.46  100.18
  -6 -14 -10  123.89   59.56
   6 -14  10   34.08   24.15
  -6 -16  10   56.73   28.20
  -6  16   9    8.92   27.04
  -6 -16   9   52.93   38.93
  -6  16   8   39.74   19.74
  -6 -16   8   47.62   30.01
  -6  16   7  187.41   56.68
  -6  16   7  184.96   25.35
  -6  16   7  182.33   25.20
  -6  16   6  179.19   46.75
  -6  16   6   81.15   23.19
  -6  16   5  386.25   83.70
  -6  16   5  271.47   45.76
   6 -16  -5  335.97   88.06
  -6  16   4 1428.02   91.67
   6  16  -4 1642.08  155.93
  -6  16   4 1586.11   95.14
   6 -16  -4 1568.52  105.39
  -6  16   3  359.80   80.59
   6  16  -3  472.91  140.99
  -6  16   3  340.29   34.47
  -6  16   2   35.12   13.70
   6  16  -2   -0.09    4.03
   6  16  -2   -6.36   62.27
  -6 -16   2   -0.64    6.34
   6 -16  -2    6.68    4.26
  -6  16   1  249.82   37.85
   6  16  -1  243.31   49.77
   6  16  -1  412.27   76.01
  -6  16   1  249.60   30.61
  -6 -16   1  197.97   53.60
   6 -16  -1  208.67   49.18
  -6  16   0  903.39  124.38
   6  16   0  975.40   52.04
  -6  16   0  936.04   46.60
   6  16   0  874.32  107.08
  -6 -16   0  896.38  126.63
   6 -16   0 1081.82   53.72
  -6 -16   0  877.47  111.32
  -6  16  -1  202.74   40.91
   6  16   1  139.67   24.91
  -6  16  -1  105.45   17.66
   6  16   1   76.30   38.81
  -6 -16  -1  133.84   28.63
   6 -16   1  147.51   25.91
  -6 -16  -1  122.91   29.76
   6  16   2 8074.58  134.39
  -6  16  -2 6909.01  415.79
   6  16   2 7197.63  451.31
   6 -16   2 7125.69  426.83
   6  16   3 1933.62  155.65
  -6  16  -3 1703.25  132.66
  -6 -16  -3 1903.75  145.14
   6 -16   3 1960.94  125.50
   6  16   4  338.05   72.29
  -6  16  -4  262.09   80.70
  -6 -16  -4  267.29  101.00
  -6 -16  -4  187.69   36.27
   6 -16   4  276.91   54.50
   6  16   5   85.09   39.12
  -6  16  -5   17.77   25.47
  -6 -16  -5   30.64   45.12
   6 -16   5    2.16   22.97
  -6 -16  -5   18.87    7.16
   6  16   6  327.56   59.80
  -6  16  -6  619.42   66.47
  -6 -16  -6  525.85  115.15
   6 -16   6  598.64  106.09
   6  16   7   63.72   29.91
  -6  16  -7   52.51   36.35
  -6 -16  -7  -14.96   45.69
   6 -16   7   19.03   20.20
   6  16   8  220.18  109.62
  -6  16  -8  543.18   79.23
  -6 -16  -8  596.23  104.40
   6 -16   8  351.21   88.56
  -6  16  -9  374.93  122.01
  -6 -16  -9  179.43   69.83
   6 -16   9  212.17  107.30
  -6  18  10   66.76   31.25
  -6 -18  10   25.25   26.66
  -6 -18   9  154.78   30.76
  -6  18   8  128.97   32.90
  -6 -18   8   24.15   26.64
  -6  18   7  399.05   35.27
  -6  18   6  220.27   33.47
  -6  18   5  541.40   68.26
  -6  18   5  500.31   57.85
   6 -18  -5  546.15   68.33
  -6  18   4 2337.03  220.97
   6 -18  -4 2422.19  226.71
  -6  18   3  923.77   67.62
   6  18  -3 1114.75  130.64
  -6  18   3  859.50   55.66
   6 -18  -3  846.73   61.12
   6  18  -2  458.26   45.37
  -6  18   2  482.11   87.95
   6  18  -2  425.29   40.30
   6  18  -2  564.70  145.23
  -6  18   2  399.43   68.78
   6 -18  -2  440.52   44.75
  -6  18   1  185.67   42.63
   6  18  -1  168.69   43.61
   6  18  -1  132.57   65.32
  -6  18   1  200.94   33.71
  -6 -18   1  140.47   28.71
   6 -18  -1  171.65   28.54
  -6  18   0 1823.91  119.14
   6  18   0 1654.28  109.19
   6  18   0 2176.46  171.06
  -6 -18   0 1978.24  166.89
   6 -18   0 2050.99  128.68
   6  18   1 1011.72   94.90
  -6  18  -1 1427.47   97.03
  -6 -18  -1 1234.92  103.70
  -6 -18  -1 1209.95   86.24
   6 -18   1 1094.58   76.07
  -6  18  -2   54.96   22.52
   6  18   2   12.46   16.04
   6  18   2   61.30   48.87
  -6 -18  -2   60.18   31.40
   6 -18   2   40.92   18.15
   6  18   3  633.92  109.39
  -6  18  -3  792.98  201.43
  -6 -18  -3  733.62  191.72
  -6 -18  -3  661.01   93.81
   6 -18   3  960.86   93.62
   6  18   4 1011.80  114.65
  -6  18  -4 1165.71  105.88
  -6 -18  -4 1138.99  165.44
  -6 -18  -4  974.29   77.75
   6 -18   4 1072.31  163.79
   6  18   5  113.43   35.50
  -6  18  -5   72.02   35.09
  -6 -18  -5  171.50   51.39
   6 -18   5  150.50   30.93
   6  18   6  255.31   87.76
  -6  18  -6  252.61   50.00
  -6 -18  -6  437.42   71.80
   6 -18   6  352.34   51.71
   6  18   7  110.56   43.73
  -6  18  -7   49.37   39.73
  -6 -18  -7  110.68   54.93
   6 -18   7   69.61   32.36
  -6  18  -8   -2.61   41.61
  -6 -18  -8   73.39   82.62
   6 -18   8   40.21   25.28
  -6  18  -9   12.64   40.95
  -6 -18  -9   30.26   58.14
   6 -18   9   38.25   23.41
  -6  20  10   54.39   26.41
  -6 -20  10   44.77   30.26
  -6  20   9  154.09   30.46
  -6 -20   9  170.55   31.56
  -6  20   8    3.24   14.42
  -6 -20   8   78.77   39.69
  -6  20   7  924.48  113.61
  -6 -20   7  909.77  114.65
  -6  20   6  194.11   53.66
  -6  20   5  203.05   64.02
  -6  20   4 2536.60  192.70
  -6  20   4 2280.79  167.81
   6 -20  -4 2993.46  225.46
  -6  20   3  365.72   90.01
   6  20  -3  422.87  107.07
  -6  20   3  346.06   57.34
   6 -20  -3  525.28   75.00
   6  20  -2   72.31   14.13
  -6  20   2   92.50   23.83
   6  20  -2   77.85   16.93
   6  20  -2  107.09   48.20
   6 -20  -2  143.57   21.33
  -6  20   1 1417.47   92.81
   6  20  -1 1366.70   87.42
   6  20  -1 1523.01  337.95
  -6  20   1 1426.65   90.71
  -6 -20   1 1624.91  108.95
   6 -20  -1 1697.20  106.30
  -6  20   0  561.97  113.40
   6  20   0  453.10  104.22
   6  20   0  504.06   92.26
  -6  20   0  337.11   92.02
  -6 -20   0  423.36   61.77
   6 -20   0  498.13   55.38
  -6  20  -1  137.14   41.34
   6  20   1   85.66   23.96
   6  20   1  219.58   55.47
  -6 -20  -1   86.94   26.67
   6 -20   1  101.47   34.81
   6  20   2  245.06   67.15
  -6  20  -2  536.31  142.04
  -6 -20  -2  213.89   85.57
   6 -20   2  315.94   72.64
   6  20   3   57.91   39.63
  -6  20  -3  180.95   49.19
  -6 -20  -3  177.76   67.83
  -6 -20  -3   93.70   24.41
   6 -20   3  102.16   31.52
   6  20   4  551.72   96.92
  -6  20  -4  463.50  138.73
  -6 -20  -4  553.56   78.94
   6 -20   4  715.33   75.02
   6  20   5  307.30   65.32
  -6  20  -5  457.53   78.19
  -6 -20  -5  475.05   71.82
   6 -20   5  282.47   93.07
  -6  20  -6  239.75   50.19
  -6 -20  -6  163.26   53.66
  -6  20  -7   52.45   34.02
  -6 -20  -7   64.28   56.63
   6 -20   7   38.40   26.51
  -6  20  -8   55.05   53.07
  -6 -20  -8  -31.56   48.16
   6 -20   8   22.17   18.45
  -6  20  -9   44.47   32.72
  -6 -20  -9   76.20   35.40
   6 -20   9   75.13   29.54
  -6  22   9   21.01   11.77
  -6 -22   9   20.40   12.30
  -6  22   8   91.89   28.63
  -6 -22   8  105.13   32.75
  -6  22   7  601.55   60.97
  -6 -22   7  604.72   60.52
  -6  22   6  830.90  100.39
  -6  22   5   50.79   22.82
  -6  22   4   87.19   20.22
  -6  22   4   31.03    8.96
   6 -22  -4   42.74    9.91
  -6  22   3  668.93  132.00
   6 -22  -3  703.83   60.51
   6  22  -2 6157.87  451.51
  -6  22   2 6622.81   97.93
   6  22  -2 6250.77  453.06
   6  22  -2 7047.99  216.04
  -6  22   2 5688.23  415.73
   6 -22  -2 6037.26  440.74
  -6  22   1  522.35   91.27
   6  22  -1  443.66   61.56
   6  22  -1  511.01  124.79
  -6  22   1  287.37   76.53
   6 -22  -1  466.14   68.00
   6  22   0 3172.29  464.35
  -6  22   0 3395.41  301.94
  -6 -22   0 3698.03  332.21
   6 -22   0 3862.30  342.62
  -6  22  -1  252.29   39.20
   6  22   1  223.37   50.84
   6  22   1  207.82   64.19
  -6 -22  -1  296.97   52.35
   6 -22   1  278.32   42.50
   6  22   2  385.13   97.22
  -6  22  -2  334.16   52.64
  -6 -22  -2  417.57   76.20
   6 -22   2  231.31   90.58
   6  22   3 1081.25  136.15
  -6  22  -3  635.48  158.62
  -6 -22  -3  881.07  110.33
   6 -22   3  687.14   72.51
   6  22   4 1330.66  167.76
  -6  22  -4 1532.64  175.54
  -6 -22  -4 1595.38  191.42
   6 -22   4 1576.83  177.53
  -6  22  -5   59.70   37.85
   6  22   5   58.95   36.09
   6 -22   5   68.29   20.05
   6  22   6  458.04  250.26
  -6  22  -6  840.02  182.93
  -6 -22  -6  415.68  287.86
   6 -22   6  927.33   90.09
  -6  22  -7  169.64   68.54
  -6 -22  -7   35.70   52.07
   6 -22   7  135.23   48.98
  -6  22  -8  172.88   92.35
  -6 -22  -8  190.02   69.41
   6 -22   8  120.76   36.83
  -6  24   9   38.06   20.39
  -6 -24   9    7.87   32.13
  -6  24   8   34.34   14.72
  -6 -24   8   69.29   32.55
  -6  24   7  455.81  159.44
  -6 -24   7  603.39   62.63
  -6  24   6  -27.08   17.12
  -6 -24   6   60.99   33.52
  -6  24   5   33.82   11.11
  -6  24   4  100.32   24.86
   6 -24  -4   62.67   24.95
  -6  24   3  228.25   50.73
  -6  24   3  171.26   19.93
   6 -24  -3  242.27   68.17
  -6  24   2   89.74   18.97
   6  24  -2   61.37   16.10
  -6  24   2   53.61   11.36
   6 -24  -2   61.74   24.92
  -6  24   1 3063.83  230.64
   6  24  -1 2775.58  247.73
   6 -24  -1 2921.71  221.24
   6  24   0    0.91   19.16
  -6  24   0   38.63   19.42
   6  24   0  -17.40   64.90
   6 -24   0   19.80   15.71
   6  24   1  433.14   40.25
  -6  24  -1  468.64  136.50
   6  24   1  468.66  146.73
   6 -24   1  413.14   96.31
   6  24   2   32.56   30.92
  -6  24  -2   36.17   24.26
  -6 -24  -2  102.03   46.39
   6 -24   2   27.49   11.86
   6  24   3  131.80   56.75
  -6  24  -3   31.59   44.34
  -6 -24  -3   50.60   35.99
   6 -24   3   -6.39   15.92
  -6  24  -4   -4.73   20.96
  -6 -24  -4   78.51   38.93
   6 -24   4   18.04   10.18
   6  24   5  292.10   59.78
  -6  24  -5  224.79   70.42
  -6 -24  -5  178.82   53.28
   6 -24   5  263.49   45.10
  -6  24  -6   53.36   37.06
  -6 -24  -6   39.56   55.65
   6 -24   6   12.71   21.39
  -6  24  -7  -11.14   31.70
  -6 -24  -7  103.46   69.17
   6 -24   7   57.19   22.73
  -6 -24  -8  151.46   63.94
   6 -24   8   40.74   24.18
  -6  26   8  -12.18   22.33
  -6 -26   8   66.84   21.57
  -6  26   7   -5.84   13.53
  -6 -26   7   12.78   30.77
  -6  26   6   38.26   23.86
  -6 -26   6   -8.98   32.54
  -6  26   5  561.44  151.35
  -6  26   4   31.29   21.50
  -6  26   3  556.41   39.51
   6 -26  -3  370.09   76.54
  -6  26   2  336.84   74.54
   6  26  -2  289.73   44.17
   6 -26  -2  239.89   65.13
   6  26  -1   12.47   17.88
  -6  26   1   63.83   18.12
   6  26  -1   48.74   13.45
   6  26  -1  169.70   79.97
  -6  26   1   30.13   14.49
   6 -26  -1   74.27   18.20
   6  26   0  263.35   49.43
  -6  26   0  337.49   91.72
   6  26   0  296.15   44.13
   6  26   0  223.17   67.30
   6 -26   0  269.75   65.19
   6  26   1   79.58   48.04
  -6  26  -1  121.07   36.41
  -6 -26  -1   61.20   35.41
   6 -26   1   50.49   19.93
   6  26   2  268.91   71.63
  -6  26  -2  246.42   50.10
  -6 -26  -2  132.68   50.79
   6 -26   2  149.48   42.41
   6  26   3   90.67   42.62
  -6  26  -3  108.04   32.08
  -6 -26  -3  152.33   54.67
   6 -26   3  119.70   27.86
  -6  26  -4   28.07   14.01
  -6 -26  -4  114.85   47.09
   6 -26   4   14.54    9.77
   6  26   5   39.19   48.97
  -6  26  -5   29.79   22.16
  -6 -26  -5   99.12   68.86
   6 -26   5   23.44   21.04
  -6  26  -6   42.31   29.85
  -6 -26  -6  108.26   76.99
   6 -26   6   -9.06   22.29
  -6  26  -7   45.57   34.88
  -6 -26  -7    7.62   49.91
   6 -26   7   21.80   21.01
  -6  28   8   17.41   23.77
  -6 -28   8   17.92   14.38
  -6  28   7   30.13   16.40
  -6 -28   7   28.03   33.98
  -6  28   6   63.67   29.09
  -6 -28   6   87.67   30.70
  -6  28   5  391.61  112.66
  -6 -28   5  406.50   49.84
  -6  28   3  110.18   32.90
   6 -28  -3   89.03   34.52
   6  28  -2  253.66   31.09
  -6  28   2  187.59   81.10
   6 -28  -2  146.45   64.80
  -6  28   1  394.67   93.57
   6  28  -1  420.88   20.67
  -6  28   0  523.80   31.83
   6  28   0  649.72   30.93
   6 -28   0  613.48   58.81
   6  28   1  454.31  102.91
  -6  28  -1  259.28   82.69
  -6 -28  -1  264.96   46.20
   6 -28   1  247.63   73.89
   6  28   2  814.15  369.57
  -6  28  -2 1306.31  167.74
  -6 -28  -2  975.50  179.43
   6 -28   2 1111.50  162.08
  -6  28  -3   17.00   13.25
  -6 -28  -3   69.85   52.75
   6 -28   3   28.60   21.52
   6  28   4   85.16   77.83
  -6  28  -4  190.36   29.50
  -6 -28  -4  252.49   85.16
   6 -28   4  189.69   46.58
  -6  28  -5  164.92   73.68
  -6 -28  -5  255.53   70.25
  -6  28  -6  -17.31   34.05
  -6 -28  -6  172.87   70.16
   6 -28   6   17.96   26.89
  -6  28  -7   60.99   25.08
  -6 -28  -7   75.97   67.50
   6 -28   7   78.78   34.28
  -6  30   7   21.61   20.98
  -6 -30   7   -0.33   30.48
  -6  30   6  217.03   47.67
  -6 -30   6  299.22   38.40
  -6  30   5   88.60   30.62
  -6 -30   5   38.25   28.39
  -6  30   4  139.59   40.30
  -6  30   3  455.81   80.92
  -6  30   2  119.50   22.66
   6 -30  -2   94.43   17.06
  -6  30   1   27.01   18.22
   6  30  -1   32.14   14.60
   6 -30  -1   36.00   18.18
  -6  30   0   -5.53   19.48
   6  30   0   -7.46   11.48
   6 -30   0   32.62   14.06
  -6  30  -1  702.08  196.23
   6  30   1  728.65   59.74
   6 -30   1  818.97   89.49
  -6  30  -2   94.94   23.18
   6  30   2   98.81   75.37
   6 -30   2  105.75   41.70
  -6  30  -3  183.80   57.63
  -6 -30  -3  105.40   74.28
   6 -30   3  206.54   64.46
  -6  30  -4   21.87   15.62
   6 -30   4   64.25   30.15
  -6  30  -5   70.41   26.01
  -6 -30  -5   68.93   26.31
   6 -30   5   10.88   22.22
  -6 -30  -6   -1.08   57.92
   6 -30   6   31.72   20.47
  -6  32   6   17.18   19.18
  -6 -32   6  -45.44   29.32
  -6  32   5   54.38   25.04
  -6 -32   5   25.70   29.89
  -6  32   4  231.73   54.13
  -6 -32   4  278.21   50.31
  -6  32   3   41.88   15.87
  -6  32   2   66.25   19.46
  -6  32   1   67.20   19.35
   6 -32  -1   78.69   23.74
  -6  32   0   41.38   13.88
   6  32   0   22.11   12.09
   6 -32   0   43.91   19.93
  -6  32  -1   51.00   26.25
   6  32   1    9.60   11.34
  -6  32  -2   51.78   27.80
   6  32   2   91.90   24.13
   6 -32   2  137.09   60.07
  -6  32  -3   59.83   23.52
  -6 -32  -3   64.26   38.94
   6 -32   3   11.79   11.52
  -6  32  -4  102.30   30.59
  -6 -32  -4   45.92   33.60
   6 -32   4  228.44   96.03
   6 -32   5   37.26   22.31
  -6  34   5   47.30   14.93
  -6 -34   5   44.35   30.25
  -6  34   4  215.07   81.56
  -6 -34   4  234.82  103.22
  -6  34   3   33.03   23.22
  -6 -34   3   82.64   27.98
  -6  34   1  189.11  102.46
  -6  34   0  255.40   30.44
   6 -34   0  270.37   34.45
   6  34   1  116.71   23.81
   6 -34   1  170.21   30.91
  -6  34  -2  203.36   42.92
  -6  34  -3   22.94   19.80
   6  34   3    3.51   15.63
   6 -34   3    6.97   17.13
  -6  34  -4   22.85   15.44
  -6 -34  -4   31.26   46.11
   6 -34   4   57.46   33.98
  -6  36   4  113.58   86.44
  -6 -36   4  247.92   57.86
  -6  36   3    5.62   15.86
  -6 -36   3    6.79   28.49
  -6 -36   2  122.00   38.05
  -6  36   1  230.93   70.14
  -6 -36   1  197.35   55.72
  -6  36   0   43.09   21.28
  -6  36  -1   46.24   22.88
   6 -36   1   59.11   20.51
  -6  36  -2   34.18   27.51
   6  36   2   45.62   19.21
   6 -36   2   64.24   21.93
  -7   1  11   86.68   26.22
  -7   1  11   72.19   34.10
  -7  -1  10   22.52   11.38
  -7   1   9   16.84   13.83
  -7   1   9    9.16   16.51
  -7  -1   9   38.13   20.47
  -7   1   8   -0.87   10.71
  -7  -1   8   42.80   26.21
  -7  -1   8   26.02   10.07
  -7   1   7  583.25   80.53
  -7   1   7  344.51  148.05
  -7  -1   7  487.24   68.49
  -7  -1   7  609.99   71.95
  -7   1   6 3603.24  250.26
  -7   1   6 3577.34  211.15
  -7   1   6 4386.75  279.70
   7   1  -6 3231.79  265.06
   7  -1  -6 3187.68  226.68
  -7   1   5  916.87  125.95
  -7   1   5  865.62   95.43
  -7   1   5  453.14  112.15
   7   1  -5 1171.12   96.62
  -7  -1   5  780.26   81.31
   7  -1  -5  934.90  267.43
  -7  -1   5  944.35   68.90
  -7  -1   5  819.30   76.09
  -7   1   4    3.92    5.11
   7   1  -4   19.96   52.50
  -7   1   4   19.99   14.43
  -7  -1   4    9.93   14.58
  -7  -1   4   12.85    7.62
   7  -1  -4   64.02   37.08
  -7  -1   4    9.03   16.75
  -7   1   3  233.15   37.61
   7   1  -3  271.06   60.60
  -7   1   3  196.13   37.60
   7   1  -3  251.77   28.40
   7  -1  -3  157.08   38.45
  -7  -1   3  221.03   34.52
   7  -1  -3  182.84   35.00
  -7  -1   3  153.34   19.87
  -7   1   2  280.43   67.78
   7   1  -2  362.31   80.56
   7   1  -2  281.34   36.05
  -7   1   2  260.19   51.17
   7  -1  -2  245.40   20.73
  -7  -1   2  285.69   50.36
   7  -1  -2  229.30   47.50
  -7  -1   2  260.21   50.58
  -7   1   1  341.66   35.36
   7   1  -1  289.82   53.44
   7   1  -1  339.58   29.26
  -7   1   1  266.13   39.46
   7  -1  -1  477.44   69.91
  -7  -1   1  320.73   61.95
   7  -1  -1  342.76   72.77
  -7  -1   1  288.95   54.08
  -7   1   0 8241.70  348.77
   7   1   011522.16  480.42
  -7   1   010287.35  430.31
   7   1   0 9955.93  425.44
  -7  -1   011905.97  504.34
   7  -1   0 9136.84  380.62
   7  -1   011231.17  477.55
  -7   1  -1  630.36  145.36
   7   1   1  766.25  143.86
   7   1   1  547.32   28.06
   7  -1   1  530.87   91.63
   7  -1   1  976.55  111.16
  -7  -1  -1  445.61   44.98
  -7  -1  -1  550.38   50.22
   7   1   2    4.37   25.67
  -7   1  -2   62.74   25.69
   7   1   2   11.92    9.80
  -7   1  -2   30.83   16.33
   7  -1   2   10.29   14.76
  -7  -1  -2   14.30   24.22
   7  -1   2   -0.59   14.14
  -7  -1  -2   37.79   20.93
  -7   1  -3  315.23   85.92
   7   1   3  359.85   70.33
   7  -1   3  417.43  103.27
  -7  -1  -3  417.35   74.31
  -7   1  -4  597.55  101.32
   7   1   4  528.64   57.77
   7  -1   4  504.33   61.60
  -7  -1  -4  693.87  223.62
  -7   1  -5  112.91   48.57
   7   1   5   28.19   13.85
  -7  -1  -5  139.92   49.48
   7  -1   5   39.07   14.66
  -7   1  -6  880.76  107.45
   7   1   6  551.65  122.41
   7  -1   6  577.06   74.64
  -7  -1  -6  804.10   96.25
  -7   1  -7  123.25   67.41
   7   1   7   35.75   11.71
   7  -1   7   84.51   25.41
  -7  -1  -7   25.74   54.67
   7   1   8   97.91   26.48
   7  -1   8   21.43   16.71
  -7  -1  -8  153.42   64.04
  -7   1  -9   72.24   74.25
   7   1   9   -5.41   19.51
  -7  -1  -9   64.70   56.16
   7  -1   9   37.16   18.25
  -7   1 -10   43.00   65.50
   7   1  10   -3.68   15.54
   7  -1  10   20.13   20.60
  -7  -1 -10   67.37   50.16
  -7   3  11   31.02   14.75
  -7  -3  11   34.18   20.43
  -7   3  10   12.06   17.58
  -7  -3  10   26.03   23.54
  -7   3   9  191.16   33.17
  -7   3   9  111.66   23.38
  -7  -3   9  197.83   27.01
  -7  -3   9  136.39   27.06
  -7  -3   8   41.41   29.21
  -7  -3   8   44.52   10.51
  -7   3   7  356.43   62.66
  -7   3   7  443.91   67.66
  -7   3   7  262.59   42.34
  -7  -3   7  408.56   57.98
  -7  -3   7  432.16   62.84
  -7   3   6   21.41   23.18
   7   3  -6   48.07   53.38
  -7   3   6   32.11   11.16
  -7  -3   6   28.62   11.70
   7  -3  -6   36.54   33.43
  -7  -3   6   41.84   17.76
   7   3  -5  223.06   74.84
  -7   3   5  318.60   61.80
  -7  -3   5  315.00   44.08
   7  -3  -5  284.09   53.37
  -7  -3   5  303.37   37.84
  -7   3   4 1170.87   69.85
   7   3  -4 1300.55  110.33
  -7   3   4 1264.48   81.86
  -7  -3   4 1359.07   86.29
  -7  -3   4 1227.33   70.98
   7  -3  -4 1052.60   88.22
  -7  -3   4  879.94   65.15
  -7   3   3  126.07   26.74
  -7   3   3   77.97   13.74
   7   3  -3   60.60   11.42
   7   3  -3  168.25   45.22
  -7  -3   3   84.20   12.43
   7  -3  -3   75.49   33.41
   7  -3  -3   73.25   13.21
  -7  -3   3   38.79   17.46
   7   3  -2  382.90   55.06
   7   3  -2  321.20   17.57
  -7   3   2  295.05   51.68
  -7   3   2  251.21   50.32
  -7  -3   2  427.26   64.89
  -7  -3   2  315.97   31.22
   7  -3  -2  287.84   62.90
   7  -3  -2  352.76   47.76
   7   3  -1 1721.18  254.89
  -7   3   1 1175.90   61.75
   7   3  -1 1090.94   50.97
  -7   3   1 1177.78   58.50
   7  -3  -1 1258.21   59.99
  -7  -3   1 1428.70   75.78
   7  -3  -1 1362.38   78.16
  -7  -3   1 1483.43   87.23
  -7   3   0 2617.33  115.74
   7   3   0 2939.87  133.31
  -7   3   0 2949.96  124.17
   7   3   0 2488.21  117.95
  -7  -3   0 3109.33  138.74
   7  -3   0 2610.21  108.10
   7  -3   0 3622.26  160.42
  -7  -3   0 2579.42  110.99
   7   3   1  416.20   37.66
  -7   3  -1  483.84   44.15
   7   3   1  310.80   60.12
  -7   3  -1  413.10   66.24
   7  -3   1  433.79   94.92
  -7  -3  -1  355.76   40.36
   7  -3   1  324.04   36.67
  -7  -3  -1  407.50   67.03
   7   3   2 1523.89   99.00
  -7   3  -2 1553.13  154.61
   7   3   2 1204.35   76.33
  -7   3  -2 1259.07  144.10
   7  -3   2 1526.09   93.85
  -7  -3  -2 1291.86   93.83
   7  -3   2 1331.33   84.09
  -7  -3  -2 1380.24   84.19
   7   3   3 1257.01  109.51
  -7   3  -3 1127.86   69.55
  -7  -3  -3 1010.10  175.11
   7  -3   3  923.67  127.58
  -7   3  -4  637.95   80.62
   7   3   4  759.21   99.22
  -7  -3  -4  991.95   94.81
   7  -3   4  926.45   68.72
  -7   3  -5  128.70   48.79
   7   3   5  141.83   30.24
   7  -3   5  146.66   40.99
  -7  -3  -5  246.61   66.56
  -7   3  -6  677.21  111.24
   7   3   6  372.74   60.44
  -7  -3  -6  442.32   95.78
   7  -3   6  495.55   98.09
  -7   3  -7   29.65   45.20
   7   3   7   32.23   19.68
   7  -3   7   39.23   22.25
  -7  -3  -7   -2.44   51.03
  -7   3  -8    8.31   54.00
   7   3   8   34.77   15.75
  -7  -3  -8  113.86   84.19
  -7   3  -9  -46.50   46.99
   7   3   9   23.57   14.93
  -7  -3  -9   27.57   61.81
   7  -3   9   33.63   19.76
  -7   3 -10   96.71   67.43
   7   3  10   82.44   29.87
  -7  -3 -10  122.99   64.29
   7  -3  10  132.73   38.17
  -7  -5  10  131.80   26.37
  -7  -5  10   84.80   24.00
  -7   5   9  111.77   36.04
  -7  -5   9  138.29   35.09
  -7   5   8   18.64    9.37
  -7  -5   8   19.71    9.39
  -7   5   7  177.88   36.72
  -7   5   7  108.49   42.49
  -7  -5   7  163.49   45.56
  -7   5   6   22.39   25.95
   7   5  -6   16.16   52.52
  -7   5   6   12.72    6.94
  -7   5   6   16.25    7.35
   7  -5  -6   53.38   20.79
  -7  -5   6   26.21   14.66
  -7  -5   6    8.17    3.77
  -7   5   5 1627.55  116.98
   7   5  -5 1707.94  143.71
  -7   5   5 1538.74   97.43
  -7  -5   5 1729.68  104.51
   7  -5  -5 1803.69  144.32
  -7  -5   5 1598.37  106.40
  -7   5   4 2505.93   91.47
   7   5  -4 2514.84  149.74
  -7  -5   4 2378.17   92.80
  -7  -5   4 2920.01  100.99
  -7  -5   4 2611.70  158.08
   7  -5  -4 2110.67  106.95
   7   5  -3    5.58    6.22
  -7   5   3   -8.66   12.93
  -7   5   3   14.12    7.20
   7   5  -3   54.60   40.53
  -7  -5   3   10.89    6.35
   7  -5  -3   88.22   36.37
  -7  -5   3   25.20   15.34
   7  -5  -3   13.20   11.49
   7   5  -2  202.53   42.25
   7   5  -2  172.10   31.98
  -7   5   2  210.59   40.25
  -7   5   2  148.50   41.21
  -7  -5   2  254.62   37.88
  -7  -5   2  163.76   25.43
   7  -5  -2  103.59   19.14
   7  -5  -2  131.63   25.84
   7   5  -1  118.55   42.85
  -7   5   1   92.30   32.26
  -7   5   1   77.90   14.51
   7   5  -1   53.17    7.16
  -7  -5   1   60.50   24.87
   7  -5  -1   82.04   23.97
   7  -5  -1   73.42   12.10
  -7   5   0  644.46   45.75
   7   5   0  670.37   37.29
  -7   5   0  722.78   39.98
   7   5   0  602.09   83.75
  -7  -5   0  760.03   63.69
   7  -5   0  676.81   38.34
   7  -5   0  928.95   57.51
  -7  -5   0  640.92   36.04
   7   5   1   62.03   26.73
   7   5   1   40.85   12.57
  -7   5  -1   29.81   12.16
  -7   5  -1   13.25    8.98
  -7  -5  -1   35.91   27.86
  -7  -5  -1   23.19   10.34
   7  -5   1   14.65   15.76
   7  -5   1   18.79   11.68
   7   5   2 1601.81  107.62
  -7   5  -2 1732.13  134.33
   7   5   2 1183.16   79.33
  -7   5  -2 1414.25   87.35
   7  -5   2 1648.85  112.93
  -7  -5  -2 1627.54  296.75
   7  -5   2 1385.67   95.31
  -7  -5  -2 1482.17   92.11
   7   5   3   11.24   12.28
  -7   5  -3   22.25   34.63
  -7  -5  -3   31.20   38.75
   7  -5   3    5.55   19.50
  -7  -5  -3   15.85   13.64
   7   5   4   37.78   19.45
  -7   5  -4   60.58   20.81
  -7  -5  -4  -23.04   39.66
   7  -5   4   30.01   21.74
  -7   5  -5  410.89   76.93
   7   5   5  503.98   86.59
  -7  -5  -5  376.34   78.52
   7  -5   5  544.46  145.99
  -7   5  -6  842.63  103.13
   7   5   6  880.98   92.28
  -7  -5  -6  874.32  107.72
   7  -5   6 1000.60  101.63
  -7   5  -7   19.97   22.04
   7   5   7   33.01   13.55
   7  -5   7   24.64   14.20
  -7  -5  -7    4.50   46.85
  -7   5  -8  206.33   74.46
   7   5   8   98.86   35.96
  -7  -5  -8  101.86   68.69
   7  -5   8   50.53   23.68
  -7   5  -9  218.36   66.03
   7   5   9   89.12   28.04
  -7  -5  -9  182.57   66.25
   7  -5   9  251.18   34.73
   7   5  10   76.00   26.16
  -7   5 -10   72.04   50.21
  -7  -5 -10  -25.12   50.75
  -7   7  11  100.59   22.08
  -7   7  10  207.99   27.64
  -7   7  10  237.42   24.59
  -7  -7  10  228.01   59.95
  -7   7   9  222.63   57.29
  -7   7   9  155.01   18.34
  -7  -7   9  271.16   30.53
  -7   7   8  875.70  134.25
  -7  -7   8  866.70   95.53
  -7   7   7  272.05   61.81
  -7   7   7  191.02   54.49
  -7  -7   7  178.38   56.27
  -7  -7   7  313.56   38.21
   7   7  -6  567.18  109.65
  -7   7   6  305.58   84.96
  -7   7   6  422.10   66.48
   7  -7  -6  500.92  144.92
  -7  -7   6  494.60   73.52
  -7  -7   6  506.32   69.78
   7   7  -5 2434.47  188.93
  -7   7   5 2750.76  168.17
  -7  -7   5 3518.74  208.52
   7  -7  -5 2968.62  205.79
  -7  -7   5 2849.12  174.02
   7   7  -4 1248.15  106.36
  -7   7   4 1207.36   69.66
  -7   7   4 1034.16   47.35
  -7   7   4 1298.76   54.49
  -7  -7   4 1271.06   53.65
   7  -7  -4 1157.13   79.86
  -7  -7   4 1244.70   47.00
   7   7  -3 1782.69  141.62
  -7   7   3 1916.89  112.52
   7   7  -3 1743.13   97.82
  -7   7   3 1790.98  104.19
   7  -7  -3 1872.91  109.80
   7  -7  -3 2144.96  140.17
  -7  -7   3 2235.08  128.78
  -7   7   2 4665.75  188.90
   7   7  -2 4612.09  180.90
  -7   7   2 4838.74  196.41
   7   7  -2 4327.26  207.66
  -7  -7   2 4655.58  189.39
  -7  -7   2 3974.62  173.18
   7  -7  -2 4461.40  188.24
   7   7  -1 1471.65  108.84
  -7   7   1 1286.50   66.46
   7   7  -1 1258.10   56.11
  -7   7   1 1172.07   56.13
  -7  -7   1  967.75   52.83
   7  -7  -1 1226.73  109.63
  -7  -7   1 1097.29  183.18
   7  -7  -1 1088.27   52.03
   7   7   0 2710.78  144.29
  -7   7   0 2464.54  109.42
   7   7   0 2363.99  148.24
  -7   7   0 2539.83  108.60
  -7  -7   0 2926.81  185.06
  -7  -7   0 2895.90  130.35
   7  -7   0 2083.52   91.82
   7  -7   0 2167.62   96.29
   7   7   1  169.91   50.16
  -7   7  -1  208.91   39.73
   7   7   1   85.08   20.44
  -7   7  -1  152.32   30.58
  -7  -7  -1  202.20   31.56
   7  -7   1  142.93   16.91
  -7  -7  -1  166.67   33.41
   7  -7   1  137.75   23.23
   7   7   2 4754.43  312.27
  -7   7  -2 5249.65  305.07
   7   7   2 4268.48  248.77
  -7  -7  -2 4644.49  282.97
  -7  -7  -2 4841.54  272.44
   7  -7   2 4743.74  273.72
   7   7   3 1618.43  107.81
  -7   7  -3 1404.83   83.10
  -7  -7  -3 1462.57   90.63
   7  -7   3 1646.31   73.28
   7   7   4   11.23   17.43
  -7   7  -4   27.54   35.64
  -7  -7  -4   48.11   41.17
   7  -7   4   37.28   19.64
   7   7   5  310.66  107.71
  -7   7  -5  239.71   72.27
  -7  -7  -5  367.78   83.94
   7  -7   5  351.15   80.45
  -7   7  -6  194.49   60.52
   7   7   6  192.86   51.48
  -7  -7  -6  167.31   59.78
   7  -7   6  181.58   48.05
  -7   7  -7  327.47   79.16
   7   7   7  230.52   62.06
  -7  -7  -7  172.82   56.09
   7  -7   7  299.98   60.83
  -7   7  -8  475.80  117.45
   7   7   8  526.23   50.29
  -7  -7  -8  601.14  102.13
   7  -7   8  524.31  134.52
   7   7   9  222.66   32.47
   7  -7   9   98.65   49.38
  -7  -7  -9  146.08   59.21
  -7   7 -10   -5.06   51.99
   7   7  10   33.86   12.99
  -7  -7 -10  179.42  108.15
   7  -7  10   27.25   18.30
  -7   9  11   59.01   25.81
  -7  -9  11   22.90   25.89
  -7   9  10  165.97   37.46
  -7  -9  10  181.10   59.22
  -7   9   9   44.32   18.52
  -7  -9   9  114.83   33.57
  -7   9   8   73.38   18.02
  -7   9   7   57.07   21.65
  -7   9   7   60.40   16.75
  -7  -9   7   55.16   12.08
  -7  -9   7   51.75   13.03
   7   9  -6  893.60  120.09
  -7   9   6 1001.99  114.98
  -7   9   6  941.02   89.01
   7  -9  -6  858.50  161.36
  -7  -9   6  978.53   88.49
  -7  -9   6 1006.18   88.68
  -7   9   5   74.21   22.38
   7   9  -5   76.30   50.47
  -7   9   5  101.06   26.48
  -7  -9   5  109.39   15.62
  -7  -9   5   99.18   10.26
   7   9  -4 2850.22  161.49
  -7   9   4 2653.43  123.17
  -7   9   4 2857.39  100.77
  -7   9   4 3007.75  109.91
  -7  -9   4 3068.31  106.57
   7  -9  -4 2919.70  133.89
  -7  -9   4 2990.42  101.14
   7   9  -3  163.09   64.71
  -7   9   3  113.65   36.03
   7   9  -3  106.12   19.58
  -7   9   3  102.46   23.72
   7  -9  -3  100.28   14.58
   7  -9  -3   63.60   17.88
  -7  -9   3   89.77   22.15
   7   9  -2 1267.72  111.38
   7   9  -2 1506.06   86.10
  -7   9   2 1563.64   93.12
  -7   9   2 1544.74   91.11
  -7  -9   2 1803.40  110.80
   7  -9  -2 1709.54  107.33
  -7  -9   2 1112.22   75.72
   7  -9  -2 1759.02  103.44
   7   9  -1 1275.79  105.62
   7   9  -1 1514.71   90.40
  -7   9   1 1306.10   80.24
  -7   9   1 1255.55   77.75
   7  -9  -1 1504.89   89.43
  -7  -9   1 1393.11  120.04
  -7  -9   1 1670.23  106.11
   7   9   0  723.60   63.76
  -7   9   0  917.47   65.39
   7   9   0  646.12   43.73
  -7   9   0  758.98   26.65
  -7  -9   0  978.19   88.55
  -7  -9   0  646.41  136.60
   7  -9   0  776.81   51.28
   7  -9   0  862.89   55.78
  -7   9  -1 2112.12  124.46
  -7   9  -1 2312.07  172.79
   7   9   1 3319.89  405.26
  -7  -9  -1 2346.73  148.90
   7  -9   1 2454.38  144.24
  -7  -9  -1 2183.89  128.15
   7  -9   1 2323.19  136.73
   7   9   2 4435.67  165.80
  -7   9  -2 4991.65  181.87
  -7  -9  -2 5951.20  225.42
  -7  -9  -2 5486.58  188.47
   7  -9   2 6299.92  218.44
   7   9   3  975.87  139.95
  -7   9  -3 1104.94  138.86
  -7  -9  -3  772.08  200.48
   7  -9   3  723.18  101.75
   7   9   4 1451.92  105.62
  -7   9  -4 1390.90  105.17
  -7  -9  -4 1639.75  127.79
   7  -9   4 1680.52  109.93
   7   9   5  514.08  146.45
  -7   9  -5  414.53   66.43
  -7  -9  -5  402.12   85.49
   7  -9   5  616.12   79.30
   7   9   6  153.90   45.75
  -7   9  -6   62.28   29.74
  -7  -9  -6  208.93   63.81
   7  -9   6  108.37   34.69
   7   9   7   35.46   14.95
  -7   9  -7   49.67   42.40
  -7  -9  -7   35.49   47.05
   7  -9   7   46.84   29.58
  -7   9  -8  857.88  100.06
  -7  -9  -8  999.41  110.44
   7  -9   8  778.74   82.11
  -7   9  -9   91.18   61.64
   7   9   9   -0.03   24.50
   7  -9   9    9.77   19.21
   7   9  10   45.75   17.94
  -7   9 -10   48.23   56.84
  -7  -9 -10  140.01   59.18
   7  -9  10   59.69   25.62
  -7 -11  11   40.73   31.34
  -7  11  10  161.43   72.23
  -7 -11  10  276.18   33.20
  -7  11   9  342.22   60.09
  -7 -11   9  339.00   69.88
  -7  11   8   90.22   24.36
  -7  11   8  160.42   26.25
  -7  11   7   35.14   19.36
  -7  11   7   20.08    8.48
  -7  11   6  653.82   81.97
   7 -11  -6  664.01  172.76
  -7  11   5  180.87   27.14
   7  11  -5   38.12   70.91
   7 -11  -5  263.13   56.76
  -7  11   4   49.56   24.24
   7  11  -4   36.84   24.98
  -7  11   4   68.21   14.19
   7 -11  -4  118.49   35.74
   7  11  -3  624.98   56.49
  -7  11   3  617.27  109.85
   7  11  -3  757.59  203.38
  -7  11   3  642.41   61.49
  -7 -11   3  602.07   57.02
   7 -11  -3  537.94   57.54
   7  11  -2  102.54   11.75
  -7  11   2  200.30   71.08
   7  11  -2  121.10   58.20
  -7 -11   2   99.02   22.60
   7 -11  -2  164.72   35.49
  -7  11   1   16.10    8.35
   7  11  -1   12.87    7.03
   7  11  -1  -25.77   38.50
  -7 -11   1   22.98   20.57
  -7 -11   1   15.45    8.05
   7 -11  -1   22.49    7.29
   7 -11  -1  -10.70   12.26
  -7  11   0 3490.51  203.59
   7  11   0 3739.89  288.89
  -7  11   0 3188.25  182.91
   7  11   0 3213.12  209.52
  -7 -11   0 3105.46  184.79
   7 -11   0 3192.62  183.16
  -7 -11   0 3337.58  210.04
  -7  11  -1  783.15   79.58
   7  11   1  769.61   80.86
  -7  11  -1  710.31   68.85
   7  11   1  898.50  139.60
  -7 -11  -1  628.15   69.92
   7 -11   1  837.57   82.59
  -7 -11  -1  947.27  156.93
  -7  11  -2   82.39   25.11
   7  11   2  103.09   26.67
   7  11   2  175.71   42.42
  -7 -11  -2  102.62   35.54
   7 -11   2  132.77   24.61
  -7 -11  -2   49.07   19.66
   7  11   3   95.43   55.76
  -7  11  -3  323.08   50.07
  -7 -11  -3  105.93   42.16
   7 -11   3  235.56   50.35
   7  11   4   16.50   19.36
  -7  11  -4  -19.85   35.99
  -7 -11  -4   91.81   44.79
   7 -11   4   37.16   21.39
   7  11   5  172.37   58.92
  -7  11  -5  163.07   48.32
  -7 -11  -5  156.68   62.24
   7 -11   5  191.05   56.92
   7  11   6 1869.13  216.89
  -7  11  -6 1873.05  228.33
  -7 -11  -6 2307.67  275.01
   7 -11   6 1874.40  209.88
   7  11   7   74.71   25.51
  -7  11  -7   92.01   62.26
  -7 -11  -7   42.89   45.36
   7 -11   7   32.56    9.32
  -7  11  -8   59.91   46.68
  -7 -11  -8   94.16   53.43
   7 -11   8   20.79   15.11
   7  11   9  229.26   87.05
  -7  11  -9  223.24   73.25
  -7 -11  -9  391.61  137.03
   7 -11   9  266.75   35.34
  -7  13  11   15.79   21.19
  -7 -13  11    0.84   26.95
  -7  13  10    1.14   15.89
  -7 -13  10    4.13   27.60
  -7  13   9   84.60   17.76
  -7 -13   9   80.79   41.68
  -7  13   8  170.34   36.46
  -7  13   7  710.16  101.74
  -7  13   6  109.04   29.33
  -7  13   6   81.46   38.28
   7 -13  -6  109.87   46.24
  -7  13   5  860.73  151.18
   7  13  -5  836.83  130.88
   7 -13  -5  774.78   82.90
  -7  13   4  429.67   81.53
   7  13  -4  328.81   99.17
  -7  13   4  339.43   62.63
   7 -13  -4  442.59   60.44
  -7  13   3   15.65    8.83
  -7  13   3   25.40    9.07
   7  13  -3  -12.07   38.65
   7 -13  -3    3.39    7.23
  -7 -13   3    6.25    3.98
   7  13  -2  611.06   57.38
  -7  13   2  869.32   99.81
   7  13  -2  761.33  127.07
  -7  13   2  811.08   76.77
  -7 -13   2  819.12   83.46
   7 -13  -2  829.63   99.43
  -7  13   1  305.22   56.70
   7  13  -1  154.87   18.79
   7  13  -1  116.22   49.38
  -7  13   1  165.22   30.25
  -7 -13   1  254.99   32.23
   7 -13  -1  209.28   25.47
  -7  13   0 2808.30  113.02
   7  13   0 2321.87  167.33
   7  13   0 1917.04  111.70
  -7  13   0 2103.50   82.77
  -7 -13   0 2589.78  113.29
   7 -13   0 2311.59   89.21
  -7  13  -1  128.39   29.00
   7  13   1   83.73   25.67
   7  13   1  154.24   42.49
  -7 -13  -1  142.97   28.95
  -7 -13  -1  104.45   29.28
   7 -13   1  117.20   31.21
  -7  13  -2 1421.93  119.60
   7  13   2 1068.35  214.36
   7  13   2 1638.65  127.82
  -7 -13  -2 1705.82  140.86
   7 -13   2 1607.99  106.54
   7  13   3 1507.07  130.93
  -7  13  -3  864.57   88.53
  -7 -13  -3 1108.45   93.28
   7 -13   3 1098.70   83.52
   7  13   4  172.37   51.00
  -7  13  -4  266.59   61.33
  -7 -13  -4  293.03   62.64
   7 -13   4  266.95   43.87
   7  13   5  136.00   23.60
  -7  13  -5  102.06   59.18
  -7 -13  -5  100.17   46.92
   7 -13   5  185.47   53.61
   7  13   6   46.18   21.82
  -7  13  -6   59.36   32.78
  -7 -13  -6  154.59   66.57
   7 -13   6   47.18   31.43
   7  13   7   75.15   29.66
  -7  13  -7   84.26   31.91
  -7 -13  -7   24.27   46.48
   7 -13   7   81.16   28.47
   7  13   8   36.20   27.16
  -7  13  -8   45.02   33.38
  -7 -13  -8  130.86   59.32
   7 -13   8   93.69   26.89
   7  13   9   58.32   27.91
  -7  13  -9  102.33   59.47
  -7 -13  -9    6.05   52.09
   7 -13   9   31.72   14.90
  -7  15  10   46.55   17.36
  -7 -15  10   75.91   31.02
  -7  15   9  213.73   30.61
  -7 -15   9  146.20   39.58
  -7  15   8   79.61   19.10
  -7  15   7   59.21   28.44
  -7  15   6  249.27   51.29
  -7  15   6  235.40   34.47
   7 -15  -6  241.04   65.83
  -7  15   5   22.81   20.85
   7  15  -5   55.48   63.54
  -7  15   5    8.64    6.08
   7 -15  -5   49.51   26.80
  -7  15   4   54.21   17.81
   7  15  -4  179.70   59.36
  -7  15   4   22.21    6.83
   7 -15  -4   66.75   21.89
  -7  15   3   55.97   18.90
   7  15  -3  -24.66   61.15
  -7  15   3   56.47   13.87
   7 -15  -3   90.06   18.27
  -7  15   2 3981.78  241.05
   7  15  -2 4427.50  261.13
   7  15  -2 4514.95  422.60
  -7  15   2 3972.63  237.75
  -7 -15   2 4088.75  245.59
   7 -15  -2 5239.52  316.81
  -7  15   1  342.90   85.21
   7  15  -1  268.24   41.34
   7  15  -1  318.37   71.52
  -7  15   1  298.59   69.12
  -7 -15   1  393.84   46.90
   7 -15  -1  429.88   47.34
  -7  15   0 3544.70  220.46
   7  15   0 3044.82  280.44
   7  15   0 2366.37  176.17
  -7 -15   0 2765.19  178.49
   7 -15   0 2599.17  159.95
   7  15   1  465.69   77.61
  -7  15  -1  392.29   46.60
  -7 -15  -1  412.22  100.88
   7 -15   1  455.69   51.82
   7  15   2  474.10   71.25
  -7  15  -2  506.45  125.98
  -7 -15  -2  611.20   83.91
   7 -15   2  471.00   76.72
   7  15   3  161.83   69.83
  -7  15  -3  127.57   24.58
  -7 -15  -3  293.75   67.58
   7 -15   3  157.28   36.76
   7  15   4 1187.95  117.09
  -7  15  -4 1104.80  225.35
  -7 -15  -4 1268.64  129.49
   7 -15   4 1184.30  102.93
   7  15   5  100.88   24.21
  -7  15  -5  140.44   68.78
  -7 -15  -5   95.30   45.66
   7 -15   5  145.09   54.35
   7  15   6  361.99   90.49
  -7  15  -6  447.57  116.13
  -7 -15  -6  666.99   78.55
   7 -15   6  598.81   39.63
   7  15   7   33.30   23.92
  -7  15  -7   20.94   38.90
  -7 -15  -7   85.82   52.45
   7 -15   7   22.25   20.67
  -7  15  -8   -3.92   48.43
  -7 -15  -8  -20.32   60.31
   7 -15   8   39.37   27.99
  -7  15  -9   73.07   75.90
  -7 -15  -9   77.92   59.93
   7 -15   9   21.01   14.26
  -7  17  10   71.33   22.97
  -7 -17  10   26.77   26.63
  -7  17   9   32.16   14.04
  -7 -17   9   20.02   27.67
  -7  17   8  134.41   27.66
  -7 -17   8   86.17   19.17
  -7  17   7  402.99  117.44
  -7  17   6   73.52   16.87
   7 -17  -6   35.59   16.12
  -7  17   5   77.06   24.33
  -7  17   5   64.35   13.19
   7 -17  -5   34.45   16.05
  -7  17   4   42.65   20.36
   7  17  -4  -26.12   57.46
  -7  17   4    8.94    9.27
   7 -17  -4   20.37   10.68
  -7  17   3  646.11   77.08
   7  17  -3  718.37  179.76
   7 -17  -3  590.81   66.85
  -7  17   2   -9.61   17.10
   7  17  -2    4.81    3.83
   7  17  -2  143.17   68.09
  -7 -17   2   19.59   13.90
   7 -17  -2  -13.80   13.62
  -7  17   1  370.83   70.07
   7  17  -1  618.94   76.98
   7  17  -1  422.05   99.06
  -7  17   1  383.31   78.87
  -7 -17   1  517.75  144.42
   7 -17  -1  542.80   59.60
   7  17   0  311.29   73.47
  -7  17   0  443.63  107.25
   7  17   0  407.04   77.10
  -7  17   0  433.73   52.82
   7 -17   0  418.52   54.17
  -7  17  -1   75.37   26.86
   7  17   1   31.09   19.08
   7  17   1  135.15   58.04
  -7 -17  -1   86.13   41.66
   7 -17   1   14.18   10.18
   7  17   2  109.11   37.87
  -7  17  -2   30.52   27.66
  -7 -17  -2   78.74   28.82
   7 -17   2  113.85   23.31
   7  17   3  192.80   52.91
  -7  17  -3  158.45   43.04
  -7 -17  -3  131.34   47.23
   7 -17   3  154.93   38.87
   7  17   4   84.16   57.64
  -7  17  -4  165.61   41.77
  -7 -17  -4  135.94   65.02
   7 -17   4  135.29   34.69
  -7  17  -5   31.53   42.30
  -7 -17  -5   58.07   42.00
   7 -17   5   11.64   21.72
   7  17   6  159.86   53.72
  -7  17  -6   -9.64   36.58
  -7 -17  -6  -19.32   44.11
   7 -17   6    6.52   16.51
   7  17   7   -5.72   20.01
  -7  17  -7   98.69   38.97
  -7 -17  -7  -60.02   55.74
   7 -17   7   11.05   21.73
  -7 -17  -8   62.46   58.51
   7 -17   8  148.41   41.97
  -7  17  -9    0.47   46.13
  -7 -17  -9    9.88   61.29
   7 -17   9   49.44   25.88
  -7  19  10   57.52   19.52
  -7 -19  10    3.33   29.60
  -7  19   9  143.33   74.55
  -7 -19   9  123.61   64.63
  -7  19   8  124.51   36.79
  -7 -19   8  151.45   33.58
  -7  19   7   31.26   28.77
  -7  19   6    5.82   16.00
  -7  19   5   25.86   14.43
  -7  19   5   13.74    7.64
   7 -19  -5   -9.01   10.09
  -7  19   4  178.39   56.36
   7  19  -4  315.52  118.33
  -7  19   4  162.91   31.78
   7 -19  -4  222.92   59.74
  -7  19   3   -7.38   18.19
   7  19  -3   75.47   70.58
  -7  19   3   21.15   13.33
   7 -19  -3   20.65   13.49
  -7  19   2  580.59   84.63
   7  19  -2  400.97   55.21
   7  19  -2  464.09  142.04
  -7  19   2  461.80   66.08
  -7 -19   2  470.10   67.71
   7 -19  -2  372.93   57.11
  -7  19   1   53.68   18.88
   7  19  -1  128.21   18.26
   7  19  -1   11.28   65.54
  -7 -19   1   85.68   25.98
   7 -19  -1   64.74   27.05
   7  19   0 1070.44  258.00
  -7  19   0  965.25  154.75
  -7 -19   0  898.15  122.09
   7 -19   0  967.18   92.20
  -7  19  -1   63.60   27.18
   7  19   1  -10.30   16.74
   7  19   1    7.06   40.97
  -7 -19  -1   -3.39   25.20
   7 -19   1   11.10   15.61
   7  19   2  146.49   82.15
  -7  19  -2  238.56   90.51
  -7 -19  -2  342.60  107.20
   7 -19   2  262.19   57.67
   7  19   3  101.39   43.51
  -7  19  -3   48.83   29.04
  -7 -19  -3   29.51   44.80
   7 -19   3   74.79   17.06
   7  19   4  237.76   55.30
  -7  19  -4  134.86   67.44
  -7 -19  -4  199.50   61.47
   7 -19   4  214.68   57.94
   7  19   5  867.76   80.44
  -7  19  -5  602.12  182.17
  -7 -19  -5  719.72   69.60
   7 -19   5  647.41   39.39
   7  19   6  -44.54   39.96
  -7  19  -6   69.75   56.37
  -7 -19  -6   88.27   52.82
  -7  19  -7   18.21   37.28
  -7 -19  -7    6.96   51.52
   7 -19   7   35.30   26.71
  -7  19  -8   74.17   34.73
  -7 -19  -8   37.58   47.76
   7 -19   8    8.25   15.49
  -7  21   9   34.73   18.86
  -7  21   8   86.61   22.75
  -7 -21   8  168.39   80.20
  -7  21   7  153.38   42.71
  -7  21   6  104.05   23.11
  -7  21   5  171.69   53.95
   7 -21  -5  272.47   48.87
  -7  21   4 1275.18  124.36
   7 -21  -4 1311.37  189.96
  -7  21   3  251.12   52.86
   7  21  -3  525.72  121.86
   7 -21  -3  310.29   71.24
  -7  21   2   83.22   30.90
   7  21  -2   39.71    8.91
   7  21  -2  171.63   98.40
  -7  21   2   39.11   12.02
   7 -21  -2   50.81   15.50
  -7  21   1  413.98   82.50
  -7  21   1  516.85  124.07
   7  21  -1  394.10  128.35
   7 -21  -1  462.96   56.86
  -7 -21   1  564.98   94.61
   7  21   0  214.34   83.14
  -7  21   0  322.29   45.48
  -7 -21   0  265.20   47.57
   7 -21   0  261.29   49.53
   7  21   1  990.20  186.42
  -7  21  -1  812.81  146.91
  -7 -21  -1  811.82   81.56
   7 -21   1  915.20   77.23
   7  21   2  422.44   68.31
  -7  21  -2  296.86   80.50
  -7 -21  -2  464.66   73.88
   7 -21   2  313.46   80.53
   7  21   3  166.43   46.46
  -7  21  -3  273.04   65.02
  -7 -21  -3  233.24   58.22
   7 -21   3  286.59   68.98
   7  21   4   64.58   36.85
  -7  21  -4   92.05   43.98
  -7 -21  -4  214.64   50.10
   7 -21   4  140.65   31.90
   7  21   5  431.16   88.39
  -7  21  -5  419.16   77.02
  -7 -21  -5  360.55   83.12
   7 -21   5  366.93  107.08
   7  21   6   40.01   25.64
  -7  21  -6  -13.10   31.91
  -7 -21  -6   57.22   57.40
   7 -21   6   71.31   35.30
  -7  21  -7   38.02   21.77
  -7 -21  -7   11.05   47.57
   7 -21   7   74.77   26.74
  -7 -21  -8   36.98   34.97
   7 -21   8  -15.58   21.52
  -7  23   9   88.04   48.11
  -7 -23   9  119.17   40.50
  -7  23   8   63.79   22.19
  -7 -23   8   83.18   33.58
  -7  23   7   28.75   32.16
  -7 -23   7   48.82   41.06
  -7  23   6  153.07   37.85
  -7  23   5   11.80   11.19
  -7  23   4  104.10   33.11
   7 -23  -4   55.99   26.83
  -7  23   3 1182.88  157.01
   7  23  -3 1196.88  165.23
   7 -23  -3 1333.62  149.76
   7  23  -2  261.10   35.65
  -7  23   2  280.26   34.24
   7  23  -2  205.14   25.57
   7  23  -2  414.53  103.37
   7 -23  -2  234.81   74.44
  -7  23   1   13.12   10.27
  -7  23   1   -6.93   17.14
   7  23  -1  119.18   68.49
   7 -23  -1   42.73   13.26
  -7 -23   1   30.53   24.54
   7  23   0   26.26   16.42
  -7  23   0  102.87   51.66
   7  23   0   91.31   60.31
   7 -23   0  164.21   40.12
   7  23   1  -20.97   58.72
  -7  23  -1    2.12   30.61
  -7 -23  -1   63.68   45.51
   7 -23   1   43.95   15.45
   7  23   2  250.14   82.17
  -7  23  -2  171.81   50.54
  -7 -23  -2   84.44   33.44
   7 -23   2  121.78   35.67
   7  23   3 1295.20  111.92
  -7  23  -3 1139.43  230.88
  -7 -23  -3 1441.24   91.70
   7 -23   3 1369.55   55.24
   7  23   4  -45.81   40.13
  -7  23  -4   21.85   19.58
  -7 -23  -4   39.57   33.13
  -7  23  -5   30.11   28.12
  -7 -23  -5   60.46   50.01
   7 -23   5   27.94   15.73
   7  23   6    1.18   42.38
  -7  23  -6   55.63   34.81
  -7 -23  -6   -6.20   51.97
   7 -23   6   39.12   21.89
  -7  23  -7   17.06   41.50
  -7 -23  -7   80.03   39.08
   7 -23   7   64.61   29.89
  -7  23  -8  108.64   49.25
  -7 -23  -8   51.74   61.28
   7 -23   8   -7.59   22.19
  -7  25   8   36.56   19.12
  -7 -25   8   23.89   30.26
  -7 -25   7  350.84   53.19
  -7  25   6  366.06   71.05
  -7  25   5  154.52   24.42
  -7  25   4   28.01   18.71
   7 -25  -4   11.02    7.06
  -7  25   3   72.88   20.65
   7 -25  -3  141.95   38.18
  -7  25   2  464.54  122.39
   7  25  -2  436.01   48.36
   7  25  -2  463.72  107.37
  -7  25   2  432.03   52.77
   7 -25  -2  408.07   49.35
  -7  25   1   20.95    9.15
   7  25  -1   23.63    8.80
   7  25  -1   91.90   39.64
   7 -25  -1   60.65   17.18
  -7  25   0  164.56   43.75
   7  25   0   59.68   26.37
   7  25   0  142.52   69.36
  -7 -25   0  141.94   51.71
   7 -25   0  213.09   38.05
   7  25   1   76.79   50.21
  -7  25  -1  148.67   50.37
  -7 -25  -1   66.04   31.14
   7 -25   1  114.12   23.60
   7  25   2 1305.71  100.07
  -7  25  -2 1278.09   64.19
  -7 -25  -2 1275.99   81.61
   7 -25   2 1076.00   74.65
   7  25   3   83.07   57.33
  -7  25  -3  107.77   29.73
  -7 -25  -3  128.12   51.29
   7 -25   3  118.92   29.92
   7  25   4  140.83   60.83
  -7  25  -4   17.08   19.97
  -7 -25  -4  105.29   52.06
   7 -25   4   74.53   25.77
  -7 -25  -5  180.90   69.37
   7 -25   5   29.22   21.23
  -7  25  -6   10.51   35.44
  -7 -25  -6  160.74   82.46
   7 -25   6   19.93   13.99
  -7  25  -7   -1.39   37.49
  -7 -25  -7  -33.75   56.60
   7 -25   7   67.03   25.76
  -7  27   8   -8.31   21.02
  -7 -27   8   66.75   31.10
  -7  27   7   27.18   23.11
  -7  27   6  113.48   35.35
  -7  27   5   61.23   24.85
  -7  27   4  142.02   31.97
  -7  27   3   48.62   17.47
   7 -27  -3   70.58   17.24
  -7  27   2  289.49  133.72
  -7  27   1  133.82   49.45
   7  27  -1  104.32   24.81
   7  27  -1  116.07   52.52
   7 -27  -1   92.59   18.83
   7  27   0  166.94   52.49
  -7  27   0  204.48   55.63
  -7 -27   0  220.20   41.89
   7 -27   0  231.19   68.11
   7  27   1  248.38   75.51
  -7  27  -1  340.85  127.82
  -7 -27  -1  224.62   74.96
   7 -27   1  388.19   55.02
   7  27   2  206.32   69.96
  -7  27  -2  230.29   73.46
  -7 -27  -2  159.62   98.19
   7 -27   2  244.06  107.84
   7  27   3   95.78   62.56
  -7  27  -3   66.85   34.26
  -7 -27  -3   58.31   49.38
   7 -27   3   41.65   19.99
   7  27   4  264.11   84.90
  -7  27  -4  165.55   40.46
  -7 -27  -4  254.38   75.34
   7 -27   4   62.10   25.92
  -7  27  -5   39.64   15.88
  -7 -27  -5   10.38   47.02
  -7 -27  -6  127.50   62.75
   7 -27   6   47.11   32.71
  -7  29   7   79.20   28.59
  -7 -29   7   23.23   37.67
  -7  29   6   42.23   11.41
  -7 -29   6  -26.29   27.68
  -7  29   5   92.96   31.97
  -7  29   4  136.35   37.18
  -7  29   3   19.37   23.47
  -7  29   2  185.08   66.52
   7 -29  -2  102.84   21.47
  -7  29   1   29.83   18.06
   7  29  -1    7.83    6.35
   7 -29  -1   24.10   12.64
  -7  29   0  234.77   88.59
   7  29   0  199.28   62.94
   7  29   0  278.13   75.83
   7 -29   0  305.33   36.13
   7  29   1  101.38   64.28
  -7  29  -1  184.44   54.91
  -7 -29  -1    3.69   28.32
   7 -29   1   56.56   18.25
  -7  29  -2   64.21   25.19
  -7 -29  -2   67.15   55.83
   7 -29   2   34.09   11.11
   7  29   3  -34.95   56.49
  -7  29  -3   33.70   33.02
  -7 -29  -3   67.62   39.46
   7 -29   3   38.16   28.99
  -7  29  -4   68.96   27.73
  -7 -29  -4  -22.06   46.42
   7 -29   4   24.11   16.29
  -7  29  -5   95.69   45.43
  -7 -29  -5   54.81   51.88
   7 -29   5   61.50   23.35
  -7  29  -6    1.91   39.35
  -7 -29  -6   -5.21   60.56
   7 -29   6  -22.27   26.72
  -7  31   6   50.08   44.80
  -7 -31   6   83.88   43.26
  -7  31   5   25.43   29.37
  -7 -31   5   49.14   36.19
  -7  31   4  102.53   42.57
  -7  31   3   25.74    9.63
  -7  31   2   65.43   33.49
  -7  31   1   66.33   30.28
   7 -31  -1   43.14   16.13
  -7  31   0  673.74   67.75
   7  31   0  703.52   55.23
   7 -31   0  711.54   62.38
  -7  31  -1  138.10   57.13
   7  31   1   79.43   24.65
   7  31   1  169.57   68.70
   7 -31   1  188.93   32.27
  -7  31  -2  109.03   69.76
   7  31   2   67.24   58.51
   7 -31   2  125.72   28.61
  -7  31  -3  -10.07   24.10
  -7 -31  -3  -61.00   41.66
   7 -31   3   35.07   29.72
  -7  31  -4   48.21   71.98
  -7  31  -5   81.56   43.48
   7 -31   5   15.59   23.13
  -7  33   5   40.01   28.83
  -7 -33   5   48.29   38.06
  -7  33   4   26.53   41.87
  -7 -33   4  103.67   30.80
  -7  33   2   35.26   21.84
  -7  33   1   76.91   26.07
  -7  33   0   33.55   20.58
  -7  33  -1   47.65   18.70
   7 -33   1   33.57   16.12
  -7  33  -2  339.57   84.51
   7  33   2  181.96   91.77
   7 -33   2  346.07  107.27
  -7  33  -3   15.88   16.51
  -7 -33  -3   -4.80   30.69
   7 -33   3   45.87   19.26
  -7  33  -4   11.13   19.93
   7 -33   4   86.45   34.90
  -7  35   4   64.58   41.45
  -7 -35   4   55.35   34.52
  -7  35   3   32.09   20.00
  -7 -35   3   23.71   26.32
  -7  35   2   35.43   35.35
  -7  35   1   44.09   18.28
  -7  35   0   28.04   16.70
   7 -35   0   24.80   19.52
   7 -35   1   18.99   11.22
  -7  35  -2    5.71   21.61
   7 -35   2   16.66    8.99
  -8   0  11   87.50   30.90
  -8   0   9   -1.12   12.77
  -8   0   8 1360.88   47.28
  -8   0   7   13.07    9.08
   8   0  -7   -3.45   43.92
  -8   0   6  458.21   73.96
  -8   0   6  522.67   84.69
   8   0  -6  410.10  110.43
  -8   0   5   18.83   17.00
  -8   0   5   14.21   10.55
   8   0  -5   89.18   68.53
  -8   0   4 1588.78   60.20
   8   0  -4 1429.30   55.43
   8   0  -4 1466.87   99.89
  -8   0   4 1720.82   78.48
  -8   0   3   12.84    9.19
   8   0  -3    6.06    7.64
   8   0  -3   22.75   35.53
  -8   0   3   61.77   20.45
  -8   0   2 4983.55  280.04
   8   0  -2 5077.92  282.10
   8   0  -2 5589.23  337.20
  -8   0   2 6103.44  345.28
  -8   0   1   73.16   27.60
   8   0  -1   12.15    6.96
   8   0  -1   -1.06   22.93
  -8   0   1   10.43    6.50
  -8   0   0  445.69   49.34
   8   0   0  319.87   18.92
   8   0   0  365.76   87.22
  -8   0   0  273.84   26.25
  -8   0  -1   43.63   15.89
   8   0   1    3.45   18.81
   8   0   1   34.68   14.98
  -8   0  -2 1440.17   81.51
   8   0   2 1244.55  118.00
  -8   0  -3   23.60   35.54
   8   0   3   36.50   17.19
  -8   0  -4  253.36   66.37
   8   0   4   22.69   18.10
  -8   0  -5  -19.45   49.86
   8   0   5   19.03   17.16
  -8   0  -6  121.43   63.43
   8   0   6  294.23   51.70
  -8   0  -7   53.65   54.59
  -8   0  -8   39.41   68.31
   8   0   8   62.92   33.83
  -8   0  -9   43.57   52.02
   8   0   9   48.73   19.15
  -8  -2  11   17.39   20.26
  -8  -2  10   36.85   16.63
  -8   2   9   51.65   26.26
  -8  -2   9   51.66   21.18
  -8   2   8   20.70   10.89
  -8  -2   8  -12.50   23.14
  -8  -2   8   12.60    9.65
  -8   2   7   80.66   28.73
  -8   2   7  107.11   27.03
   8   2  -7  193.06   65.76
  -8  -2   7   84.33   30.35
  -8  -2   7  120.91   30.17
   8  -2  -7   67.58   55.57
  -8   2   6 2174.04  203.31
  -8   2   6 2615.47  230.96
   8   2  -6 2080.44  332.23
   8  -2  -6 2619.33  258.24
  -8  -2   6 2509.38  221.51
  -8   2   5   62.64   19.42
   8   2  -5  133.45   63.39
  -8   2   5  114.86   22.78
  -8   2   5   57.79   28.20
  -8  -2   5  109.42   11.97
  -8  -2   5   93.41   18.23
   8  -2  -5   94.99   49.87
  -8   2   4  929.88  153.25
   8   2  -4  831.76  169.18
   8   2  -4  775.00   72.25
  -8   2   4  891.61  128.03
   8  -2  -4  844.40   79.90
  -8  -2   4  702.00   74.91
   8  -2  -4  681.60  129.09
  -8   2   3  617.70  118.65
  -8   2   3  486.00   87.54
   8   2  -3  548.59   52.60
   8   2  -3  411.26  117.61
  -8  -2   3  519.84   57.12
   8  -2  -3  421.35   99.06
   8  -2  -3  522.93   66.27
  -8  -2   3  528.35   59.17
  -8   2   2 1474.73   91.58
  -8   2   2 1161.79   92.11
   8   2  -2 1269.43  119.01
  -8  -2   2 1380.12  113.95
   8  -2  -2 2062.31  282.27
  -8  -2   2 1678.60  106.42
   8  -2  -2 1261.57   74.94
   8   2  -1  517.82   70.40
  -8   2   1  391.09   72.50
  -8   2   1  391.33   53.08
   8   2  -1  357.81   20.71
  -8  -2   1  464.55   79.77
   8  -2  -1  373.73   75.99
   8  -2  -1  374.29   18.48
  -8  -2   1  327.34   49.41
  -8   2   0 3546.36  205.30
   8   2   0 4736.93  276.35
  -8   2   0 4494.54  254.10
   8   2   0 3689.46  256.46
  -8  -2   0 4643.64  269.75
   8  -2   0 4007.14  224.89
   8  -2   0 4995.33  289.76
  -8  -2   0 4180.57  237.14
  -8   2  -1   38.76   20.70
   8   2   1   71.39   38.12
   8   2   1   37.84   15.31
   8  -2   1   39.86   16.58
   8  -2   1   48.56   35.41
  -8  -2  -1   80.72   29.18
   8   2   2 2443.43  105.24
  -8   2  -2 2047.54  107.52
  -8  -2  -2 1862.65   93.09
   8  -2   2 1773.40   76.79
   8   2   3  562.28  116.64
  -8   2  -3  393.69   59.31
  -8  -2  -3  469.96  110.47
   8  -2   3  269.53   55.07
  -8   2  -4  453.36   71.85
   8   2   4  510.49   66.50
  -8  -2  -4  623.93   84.71
   8  -2   4  559.59   64.65
  -8   2  -5   29.07   37.14
   8   2   5   12.59   11.48
   8  -2   5   57.76   33.68
  -8  -2  -5   36.73   51.18
  -8   2  -6  408.40   79.57
   8   2   6  393.37  101.71
   8  -2   6  478.94  103.20
  -8  -2  -6  466.50   87.13
  -8   2  -7   37.27   55.36
   8   2   7   15.55   14.47
   8  -2   7   48.22   19.96
  -8  -2  -7   65.60   50.30
  -8   2  -8   90.24   43.52
   8   2   8   78.89   22.63
  -8  -2  -8   13.40   61.94
  -8   2  -9  107.04   59.66
  -8  -2  -9   98.42   72.31
   8  -2   9   58.95   32.35
  -8   4  11   81.11   20.72
  -8  -4  11  108.79   40.55
  -8   4  10  255.96   29.50
  -8  -4  10  254.02   59.00
  -8   4   9   95.29   21.43
  -8   4   8  385.20   89.69
  -8  -4   8  412.90   49.05
  -8   4   7  587.22   67.91
   8   4  -7  642.17   99.68
   8  -4  -7  816.73  111.23
  -8   4   6 1076.25  112.42
   8   4  -6  977.89  291.26
  -8   4   6 1349.33  125.11
  -8  -4   6 1341.90  119.52
   8  -4  -6 1260.64  367.59
  -8  -4   6 1390.05  130.56
   8   4  -5  159.27   59.56
  -8   4   5  157.20   35.29
  -8  -4   5  132.27   31.29
   8  -4  -5  185.09   52.70
  -8  -4   5  117.60   21.60
   8   4  -4 1837.55  171.16
  -8   4   4 2007.34  124.59
   8   4  -4 1763.46  107.12
  -8   4   4 2554.58  161.95
   8  -4  -4 1980.10  122.86
   8  -4  -4 1813.57  139.28
  -8  -4   4 2284.93  139.01
  -8   4   3  345.11   37.11
  -8   4   3  361.89   40.50
   8   4  -3  369.42   42.10
   8   4  -3  349.34   96.03
  -8  -4   3  371.11   62.67
   8  -4  -3  383.41   72.27
   8  -4  -3  382.86   40.12
  -8   4   2 3700.31  212.12
  -8   4   2 3219.88  183.60
   8   4  -2 3112.18  174.15
   8   4  -2 3230.72  228.62
  -8  -4   2 2659.01  159.62
  -8  -4   2 3045.20  187.31
   8  -4  -2 2364.05  145.63
   8  -4  -2 3070.75  173.86
   8   4  -1 2781.03  156.67
  -8   4   1 3116.85  181.42
  -8   4   1 3232.23  184.88
   8   4  -1 3556.12  227.64
  -8  -4   1 3433.24  200.03
   8  -4  -1 3331.39  199.38
  -8  -4   1 3754.46  218.71
   8   4   0 2074.79  132.95
  -8   4   0 1956.31  121.41
  -8   4   0 2747.50  159.47
   8  -4   0 2455.86  141.49
  -8  -4   0 2321.26  144.19
   8  -4   0 2894.24  177.22
   8   4   1   13.51   14.17
  -8   4  -1   17.86   19.87
   8   4   1   96.37   41.16
  -8  -4  -1   81.10   28.09
   8  -4   1   -7.25   27.44
   8  -4   1   17.52    7.98
   8   4   2 3183.15  133.33
  -8   4  -2 3342.28  142.79
  -8  -4  -2 3691.01  257.54
   8  -4   2 2972.64  114.01
   8   4   3  466.50  116.02
  -8   4  -3  442.78   88.19
  -8  -4  -3  514.68   76.31
   8  -4   3  392.98   44.63
   8   4   4 1261.74  124.92
  -8   4  -4 1206.69  130.72
  -8  -4  -4 1233.82  200.27
   8  -4   4 1073.63  115.58
  -8   4  -5   65.37   54.26
   8   4   5   98.05   38.21
   8  -4   5  161.83   59.72
  -8  -4  -5  289.87   77.16
  -8   4  -6  197.34   89.47
   8   4   6  108.88   32.97
   8  -4   6  130.54   26.48
  -8  -4  -6  114.70   46.12
  -8   4  -7  -19.55   51.94
   8   4   7  -22.36   14.66
   8  -4   7   29.18   19.32
  -8  -4  -7    9.00   45.95
  -8   4  -8  257.29   82.51
   8   4   8  115.62   38.98
  -8  -4  -8  151.41   53.34
  -8   4  -9  198.27   62.44
  -8  -4  -9  163.44   75.79
  -8   6  11   25.30    9.00
  -8  -6  11   35.60   24.79
  -8   6  10   13.77   16.99
  -8  -6  10   37.99   22.47
  -8   6   9  356.02  100.81
  -8   6   9  342.46   37.61
  -8   6   8   19.22   10.98
  -8  -6   8   10.26    5.06
  -8   6   7  135.25   39.59
  -8  -6   7  153.86   30.55
   8  -6  -7   72.78   43.20
   8   6  -6 1155.77  340.59
  -8   6   6 1204.20  118.67
  -8   6   6 1365.17  157.03
   8  -6  -6  887.38  162.51
  -8  -6   6 1212.55  114.05
  -8  -6   6 1229.18  110.75
  -8   6   5   38.99   23.07
  -8   6   5  103.85   15.92
   8   6  -5  130.31   59.81
  -8  -6   5   97.08   18.21
  -8  -6   5  115.01   19.26
   8  -6  -5  217.19   59.81
  -8   6   4  482.91   50.99
   8   6  -4  536.55  127.67
  -8  -6   4  357.87   62.04
   8  -6  -4  434.41   51.76
   8  -6  -4  544.81   78.88
  -8   6   3  689.77  111.17
   8   6  -3  626.96   58.33
   8   6  -3  566.47   77.90
  -8  -6   3  936.90   89.50
   8  -6  -3  693.72   68.21
   8  -6  -3  830.71  220.24
   8   6  -2  873.65  108.71
   8   6  -2  792.35   73.07
  -8   6   2  767.33   97.90
  -8   6   2  776.55   74.36
   8  -6  -2  806.36   76.52
   8  -6  -2  569.85   69.35
  -8  -6   2  818.37   97.38
   8   6  -1  275.60   69.19
  -8   6   1  426.16   72.00
  -8   6   1  327.63   46.69
   8   6  -1  255.66   14.85
  -8  -6   1  318.13   28.81
   8  -6  -1  378.03   64.14
   8  -6  -1  297.37   17.96
   8   6   0 1450.59  281.61
   8   6   0  823.42   30.54
  -8   6   0  593.09   36.02
  -8   6   0  657.62   45.50
   8  -6   0  709.60   47.25
   8  -6   0 1039.46  178.83
  -8  -6   0  573.11   52.67
  -8   6  -1  815.92   97.39
   8   6   1  822.73   82.77
   8   6   1  747.81  155.49
  -8  -6  -1  919.43  218.34
   8  -6   1  846.66   82.92
   8   6   2   75.03   23.52
  -8   6  -2  111.90   49.36
   8   6   2  120.36   36.69
  -8  -6  -2  147.86   40.05
   8  -6   2  102.47   28.15
   8   6   3 1772.05  181.65
  -8   6  -3 1715.37  209.05
  -8  -6  -3 1651.08  128.51
   8  -6   3  996.74   99.55
   8   6   4  595.65  119.76
  -8   6  -4  558.59  140.19
  -8  -6  -4  408.97   87.97
   8  -6   4  630.89   92.75
   8   6   5  185.09   67.06
  -8   6  -5   46.72   37.02
  -8  -6  -5   40.75   34.46
   8  -6   5  112.53   36.42
  -8   6  -6   27.57   50.12
   8   6   6  -23.25   22.19
  -8  -6  -6  -17.62   46.15
   8  -6   6   -7.71   19.25
  -8   6  -7  384.15   81.89
   8   6   7  287.26   46.27
   8  -6   7  356.96  111.39
  -8  -6  -7  482.74   97.18
  -8   6  -8   97.42   56.04
   8   6   8   46.43   18.70
  -8  -6  -8  105.56   66.06
   8  -6   8   -4.35   19.83
  -8   6  -9  -39.20   60.28
   8   6   9   30.21   14.96
  -8  -6  -9   81.25   61.89
   8  -6   9   24.83   21.29
  -8   8  10   10.50   15.66
  -8  -8  10   39.74   24.00
  -8   8   9   32.33   22.17
  -8   8   8  155.71   30.34
  -8  -8   8  122.55   33.51
  -8   8   7  114.06   54.53
  -8   8   7  190.33   47.22
  -8  -8   7  198.63   29.90
   8  -8  -7   90.73   38.74
  -8  -8   7  199.22   53.89
   8   8  -6  699.64  110.25
  -8   8   6  915.19   75.84
  -8  -8   6  976.85   73.69
   8  -8  -6  732.94  216.60
  -8  -8   6  904.73   79.56
  -8   8   5  156.34   37.80
  -8   8   5  112.53   29.73
   8   8  -5  245.37   49.84
  -8  -8   5  142.05   20.93
   8  -8  -5  182.99   46.84
  -8  -8   5   91.77   29.28
  -8   8   4  552.17  101.90
   8   8  -4  774.00  194.20
  -8  -8   4  372.72   63.85
  -8  -8   4  512.46   86.85
   8  -8  -4  496.68   70.54
   8   8  -3  826.71   75.65
  -8   8   3 1009.39   96.22
   8   8  -3 1249.04  124.83
  -8  -8   3 1087.35   89.65
   8  -8  -3 1283.47   95.46
   8   8  -2 1410.73   97.88
   8   8  -2 1592.80   58.37
  -8   8   2 1301.73  101.16
   8  -8  -2 1466.20   63.37
  -8  -8   2 1490.95   79.25
   8  -8  -2 1442.83   68.54
  -8   8   1  497.32  112.85
   8   8  -1  412.06   81.50
   8   8  -1  567.71  149.06
  -8  -8   1  383.97   52.06
   8  -8  -1  568.35  107.58
   8   8   0  249.36   65.46
  -8   8   0  292.09   44.41
   8   8   0  485.07   81.84
  -8   8   0  201.74   51.19
  -8  -8   0  348.17   58.48
   8  -8   0  530.59  104.36
   8   8   1   14.45   13.40
  -8   8  -1   19.37   17.43
   8   8   1  -16.10   24.42
  -8  -8  -1   48.72   33.33
   8  -8   1   29.67   10.76
  -8   8  -2 1374.88  115.00
   8   8   2 1070.71  118.79
   8   8   2  983.56  179.51
  -8  -8  -2 1132.23  201.93
   8  -8   2 1070.24   74.21
   8   8   3  764.26   63.98
  -8   8  -3  694.33  165.54
  -8  -8  -3  894.56   85.09
   8  -8   3  900.08   71.56
   8   8   4  725.56   86.51
  -8   8  -4  716.96   58.97
  -8  -8  -4  599.08  100.02
   8  -8   4  556.74  139.23
   8   8   5  421.51  103.38
  -8   8  -5  293.52   70.18
  -8  -8  -5  234.84   71.63
   8  -8   5  326.80   72.93
  -8   8  -6   27.57   23.44
   8   8   6   58.93   42.58
  -8  -8  -6  105.38   48.18
   8  -8   6    6.19   13.53
   8   8   7  303.07   50.36
  -8   8  -7  -15.00   60.16
  -8  -8  -7  184.30   56.37
   8  -8   7   16.03   20.23
   8   8   8   28.88   17.68
  -8   8  -8   54.55   48.61
  -8  -8  -8  103.40   89.79
   8  -8   8    0.97   11.51
   8   8   9   32.72   21.35
  -8   8  -9  -42.31   59.46
  -8  -8  -9  124.17   62.61
   8  -8   9   29.25   13.63
  -8 -10  11   35.64   26.53
  -8 -10  10   49.60   16.38
  -8  10   9   95.78   22.07
  -8  10   9   53.69   20.39
  -8  10   8  274.72   27.99
  -8  10   7   31.46   17.09
  -8 -10   7   16.56    3.36
   8 -10  -7   20.73   30.71
  -8  10   6   36.08   19.10
  -8  10   6   50.51   12.89
   8  10  -6   14.89   52.60
   8 -10  -6   54.18   33.67
  -8  10   5  226.96   65.52
  -8  10   5  221.14   52.71
   8  10  -5  114.69  155.82
  -8 -10   5  224.90   36.49
   8 -10  -5  206.68   47.47
  -8 -10   5  167.45   30.93
  -8  10   4  299.23   56.59
  -8  10   4  217.75   27.37
   8  10  -4  143.47   74.60
  -8 -10   4  216.95   37.31
   8 -10  -4  281.04   55.33
  -8 -10   4  254.10   40.77
   8  10  -3  937.68   57.48
  -8  10   3 1047.74   71.08
   8  10  -3 1003.11  218.76
  -8  10   3 1087.49   70.77
  -8 -10   3 1185.47   77.81
   8 -10  -3  872.70  117.22
  -8  10   2  387.33   81.55
   8  10  -2  349.02   34.08
   8  10  -2  539.43   88.19
  -8  10   2  384.68   40.01
  -8 -10   2  467.16   51.66
   8 -10  -2  387.52   46.85
   8  10  -1  -15.10    8.26
  -8  10   1   36.95   23.49
   8  10  -1   44.85   47.44
  -8  10   1    7.46    5.31
  -8 -10   1   64.57   22.89
   8 -10  -1   31.00   31.07
   8  10   0 5500.02  188.07
  -8  10   0 6893.20  242.29
   8  10   0 6590.60  270.90
  -8 -10   0 6051.08  220.40
   8 -10   0 5761.26  200.03
   8  10   1  215.25   50.05
  -8  10  -1  297.93   52.36
   8  10   1  332.24   69.82
  -8 -10  -1  246.55   53.63
   8 -10   1  282.77   34.74
   8  10   2  383.02   82.04
  -8  10  -2  278.07   67.70
  -8 -10  -2  511.04   74.65
   8 -10   2  405.51   87.42
   8  10   3 1239.43   89.60
  -8  10  -3 1363.61  102.92
  -8 -10  -3 1420.00  109.20
   8 -10   3 1522.34  103.22
   8  10   4  195.39   56.44
  -8  10  -4  323.11   63.82
  -8 -10  -4  521.91   86.66
   8 -10   4  247.88   37.72
   8  10   5  110.76   29.64
  -8  10  -5  127.16   59.83
  -8 -10  -5  129.73   64.38
   8 -10   5  168.00   37.05
   8  10   6  425.47   99.58
  -8  10  -6  539.60   65.33
  -8 -10  -6  702.81   70.13
   8 -10   6  603.38  139.67
   8  10   7  677.63  186.55
  -8  10  -7  363.11  162.80
  -8 -10  -7  611.48   96.68
   8 -10   7  522.56   96.75
   8  10   8   43.18   25.35
  -8  10  -8   21.52   58.01
  -8 -10  -8  159.52   61.79
   8 -10   8  102.53   27.14
  -8  10  -9  294.68  101.08
  -8 -10  -9  462.05   92.18
   8 -10   9  117.60   62.18
  -8  12  10  205.04   28.73
  -8  12   9  132.16   26.93
  -8  12   8  202.52   23.54
  -8  12   7  223.96   64.84
   8 -12  -7  218.87   51.20
  -8  12   6   44.88   18.61
  -8  12   6    6.34    5.48
   8  12  -6  129.65   75.94
   8 -12  -6   16.32   32.26
  -8  12   5 1870.92  144.09
   8  12  -5 2025.62  272.31
   8 -12  -5 1496.93  131.55
  -8  12   4  751.69   53.46
   8  12  -4  720.22  179.38
  -8  12   4  589.55   63.64
   8 -12  -4  832.25  129.27
   8  12  -3  162.20   17.69
  -8  12   3  169.93   33.85
   8  12  -3  149.65   70.00
  -8  12   3  149.67   42.14
  -8 -12   3  167.10   22.39
   8 -12  -3  154.79   36.45
   8  12  -2 3187.33  190.60
  -8  12   2 3416.74  208.50
   8  12  -2 3507.85  247.33
  -8 -12   2 3619.87  220.95
   8 -12  -2 3910.57  243.34
   8  12  -1 1248.40   79.05
  -8  12   1 1808.68  165.74
   8  12  -1 1262.46  292.74
  -8  12   1 1303.05   84.47
  -8 -12   1 1154.75   81.75
   8 -12  -1 1534.86  111.65
   8  12   0 1262.24   85.35
  -8  12   0 2029.61  134.36
   8  12   0 1915.85  159.45
  -8 -12   0 1739.87  120.17
   8 -12   0 1559.18  105.95
  -8  12  -1 2193.48  143.45
   8  12   1 2392.00  155.74
   8  12   1 2356.32  178.77
  -8 -12  -1 2232.22  154.93
   8 -12   1 2180.29  151.52
   8  12   2  377.09   96.08
  -8  12  -2  285.95   79.16
  -8 -12  -2  236.02   42.32
   8 -12   2  406.92  101.41
   8  12   3  534.31  145.55
  -8  12  -3  974.36  178.43
  -8 -12  -3  785.47  100.00
   8 -12   3  812.78  132.59
   8  12   4  502.59   82.32
  -8  12  -4  749.51  177.38
  -8 -12  -4  676.48   99.15
   8 -12   4  639.82   83.05
   8  12   5  382.12   71.87
  -8  12  -5  441.62  101.45
  -8 -12  -5  256.63   74.89
   8 -12   5  265.73   76.70
   8  12   6   50.31   25.56
  -8  12  -6   66.70   29.31
  -8 -12  -6   67.32   45.28
   8 -12   6   54.09   11.81
   8  12   7   31.46   21.90
  -8  12  -7   68.18   54.58
  -8 -12  -7  206.84   81.10
   8 -12   7   46.90   23.89
  -8 -12  -8   -5.63   59.15
   8 -12   8   81.28   41.75
  -8  12  -9  138.45   63.59
  -8 -12  -9   96.85   83.07
   8 -12   9   36.92   23.98
  -8 -14  10   47.21   28.94
  -8  14   9  129.58   22.01
  -8  14   8   38.75   22.83
  -8  14   7   77.85   30.05
  -8  14   6  380.62   44.48
  -8  14   6  351.22   74.20
   8 -14  -6  428.95  115.37
  -8  14   5  122.60   48.20
   8  14  -5   76.04   63.51
  -8  14   5  111.96   41.68
   8 -14  -5  208.76   51.13
  -8  14   4  772.65   74.53
   8  14  -4  842.15  201.90
   8 -14  -4  838.82   95.54
   8  14  -3  110.05   12.47
  -8  14   3  111.55   21.32
   8  14  -3   89.94   68.58
  -8  14   3   77.63   18.77
  -8 -14   3   92.31   21.84
   8 -14  -3  100.36   25.24
   8  14  -2   32.40    9.01
  -8  14   2   51.02   10.72
   8  14  -2  -29.95   61.09
  -8 -14   2   16.99   14.11
   8 -14  -2   77.86   25.76
  -8  14   1  299.35   59.02
   8  14  -1  180.35   36.93
   8  14  -1   56.69   48.25
  -8  14   1  226.37   54.43
  -8 -14   1  333.30   43.31
   8 -14  -1  206.81   61.02
  -8  14   0  118.19   22.66
   8  14   0   62.42   12.18
   8  14   0   91.12   40.57
   8 -14   0   34.35   16.89
  -8  14  -1  177.68   59.62
   8  14   1  175.91   34.41
   8  14   1  112.25   49.45
  -8 -14  -1  293.74   54.60
   8 -14   1  224.89   40.23
   8  14   2   98.44   35.22
  -8  14  -2  110.82   22.91
  -8 -14  -2  140.45   29.45
   8 -14   2  101.67   20.65
   8  14   3  114.47   60.05
  -8  14  -3  306.76   87.50
  -8 -14  -3  283.81   63.09
   8 -14   3  171.47   40.47
   8  14   4   22.82   25.43
  -8  14  -4   -2.75   38.61
  -8 -14  -4   -9.28   42.96
   8 -14   4   45.37   18.65
   8  14   5   37.29   36.90
  -8  14  -5   78.42   43.45
  -8 -14  -5  412.46   74.31
   8 -14   5   94.79   34.44
   8  14   6   -8.72   23.90
  -8  14  -6   12.51   39.05
  -8 -14  -6   58.17   49.64
   8 -14   6   -3.62   14.27
  -8  14  -7   47.80   38.47
  -8 -14  -7   -0.93   57.05
   8 -14   7   32.92   23.49
   8  14   8   54.43   14.48
  -8  14  -8   40.22   56.12
  -8 -14  -8   71.60   36.31
   8 -14   8   62.55   41.53
  -8  14  -9   69.11   59.02
  -8 -14  -9   84.22   66.75
   8 -14   9    2.34   25.21
  -8  16  10  152.01   71.80
  -8 -16  10  204.33  121.53
  -8  16   9   41.19   14.12
  -8 -16   9   60.81   27.23
  -8  16   8  355.04  105.98
  -8  16   7  128.05   48.65
  -8  16   6   36.05   16.77
   8 -16  -6   11.23   14.99
  -8  16   5  119.76   29.44
   8  16  -5   48.42   86.38
  -8  16   5   43.41   17.12
  -8  16   4 1778.87  138.94
   8  16  -4 2184.53  349.53
  -8  16   4 1651.58  124.22
   8 -16  -4 1733.13  169.76
  -8  16   3  577.81  145.40
   8  16  -3  451.39  133.57
  -8  16   3  362.56   76.37
   8 -16  -3  343.49   94.32
  -8  16   2 1107.50  149.38
   8  16  -2 1276.07  113.89
   8  16  -2 1411.26  171.12
  -8 -16   2 1208.20  111.82
   8 -16  -2 1395.46  138.70
  -8  16   1  587.62   90.33
   8  16  -1  531.18   57.32
   8  16  -1  842.64  104.38
  -8  16   1  499.23   63.62
  -8 -16   1  649.09   80.01
   8 -16  -1  525.95   58.99
  -8  16   0   32.67   22.33
   8  16   0   29.15   19.95
   8  16   0   36.32   48.43
  -8 -16   0   43.78   25.17
  -8  16  -1  115.62   29.49
   8  16   1  179.68   36.95
   8  16   1  130.06   77.41
  -8 -16  -1   90.68   31.23
   8 -16   1  180.53   34.18
   8  16   2 1159.71  336.98
  -8  16  -2 1270.40  191.55
  -8 -16  -2 1288.24  130.46
   8 -16   2 1349.25  113.07
   8  16   3   42.12   55.28
  -8  16  -3   36.59    9.12
  -8 -16  -3  189.85   75.18
   8 -16   3   24.51   15.79
   8  16   4  166.80   63.55
  -8  16  -4   71.11   43.79
  -8 -16  -4  158.52   56.13
   8 -16   4   69.40   25.47
   8  16   5  202.83   57.77
  -8  16  -5  133.25   43.85
  -8 -16  -5  172.53   57.86
   8 -16   5  173.54   39.35
   8  16   6   46.58   21.23
  -8  16  -6  101.01   48.69
  -8 -16  -6   11.17   53.86
   8 -16   6  104.97   48.16
  -8  16  -7  144.84   45.13
  -8 -16  -7  103.74   56.71
   8 -16   7  119.37   40.09
  -8  16  -8   39.29   26.82
  -8 -16  -8   47.43   37.88
   8 -16   8   24.42   27.24
  -8  18  10  151.33   43.40
  -8 -18  10  153.69   43.42
  -8  18   9  442.97   37.50
  -8 -18   9  504.60   81.80
  -8  18   8   95.26   30.84
  -8  18   7  201.42   52.69
  -8  18   6  363.52   68.05
   8 -18  -6  157.76   67.33
  -8  18   5  -17.93   16.37
   8  18  -5  266.65   90.55
   8 -18  -5    3.74   19.44
  -8  18   4  818.45  126.17
   8  18  -4  564.03  107.00
  -8  18   4  729.47   69.79
   8 -18  -4  899.43  140.35
  -8  18   3  353.54   47.27
   8  18  -3  339.23  138.54
  -8  18   3  258.30   34.45
   8 -18  -3  332.58   47.02
  -8  18   2 3186.08  238.97
   8  18  -2 3250.86  237.42
   8  18  -2 3900.88  344.97
  -8  18   2 2424.25  181.19
  -8 -18   2 3284.33  244.51
   8 -18  -2 3623.20  293.00
  -8  18   1   93.63   19.46
   8  18  -1   76.06   17.73
   8  18  -1  216.76   99.71
  -8 -18   1   51.88   18.95
   8 -18  -1   79.73   17.21
   8  18   0 3416.13  338.30
  -8  18   0 2714.54  246.10
  -8 -18   0 2198.97  212.24
   8 -18   0 2300.24  206.81
  -8  18  -1 2162.93  172.45
   8  18   1 1911.70  151.40
   8  18   1 1756.19  169.18
  -8 -18  -1 2369.42  197.48
   8 -18   1 2353.11  180.06
   8  18   2  192.67   70.51
  -8  18  -2  146.70   36.27
  -8 -18  -2  274.09   75.37
   8 -18   2  143.28   22.89
   8  18   3  923.40  116.58
  -8  18  -3  669.10  207.26
  -8 -18  -3  790.19  221.50
   8 -18   3 1327.62  131.45
   8  18   4   81.13   52.38
  -8  18  -4  -19.69   36.40
  -8 -18  -4   92.74   39.73
   8 -18   4   29.67   23.33
   8  18   5  417.71   84.64
  -8  18  -5  541.23   84.58
  -8 -18  -5  452.91   88.38
   8 -18   5  397.59   96.36
   8  18   6  164.22  114.69
  -8  18  -6  487.03   72.40
  -8 -18  -6  273.38   86.52
   8 -18   6  275.32   92.59
  -8  18  -7  251.34   71.14
  -8 -18  -7  140.73   67.98
   8 -18   7  127.44   36.16
  -8 -18  -8   46.21   46.60
   8 -18   8   20.66   23.07
  -8  20   9  127.98   75.58
  -8 -20   9  232.32   65.70
  -8  20   8  206.90   51.49
  -8  20   7   -6.43   20.14
  -8  20   6   26.30   15.06
  -8  20   5   -7.10   15.98
   8 -20  -5   -0.82   13.99
  -8  20   4  543.45  126.36
   8  20  -4  259.61   91.30
  -8  20   3   30.73   22.75
   8  20  -3   -3.74   62.32
  -8  20   3   55.38   18.97
   8 -20  -3   54.83   10.03
  -8  20   2  226.58   59.73
   8  20  -2  164.57   18.61
   8  20  -2  122.09   93.10
  -8  20   2  162.68   24.58
  -8 -20   2  187.71   48.53
   8 -20  -2  287.93   64.69
  -8  20   1   17.22   15.20
   8  20  -1   65.62   70.21
   8 -20  -1   22.66   16.30
  -8  20   0  158.44   48.79
   8  20   0  111.89   32.44
   8  20   0  165.50   80.06
  -8 -20   0  192.52   48.56
   8 -20   0  129.11   44.33
   8  20   1   76.01   11.83
  -8  20  -1   68.28   42.52
   8  20   1   64.55   54.83
   8 -20   1   51.50   15.49
   8  20   2  761.36  101.34
  -8  20  -2  789.88  148.33
  -8 -20  -2  703.61  132.76
   8 -20   2  872.70  171.52
   8  20   3  -10.14   36.18
  -8  20  -3   48.16   38.69
  -8 -20  -3   15.59   37.43
   8 -20   3  -26.50   22.31
   8  20   4  743.71  134.14
  -8  20  -4 1067.59  143.18
  -8 -20  -4  886.66  121.84
   8 -20   4  745.04   94.32
  -8  20  -5  198.06   50.76
  -8 -20  -5  372.25   68.33
   8 -20   5  265.29   39.33
  -8  20  -6   37.05   25.69
  -8 -20  -6   73.09   42.38
   8 -20   6   36.22   26.96
   8  20   7   52.98   28.60
  -8  20  -7    5.09   36.64
  -8 -20  -7   77.84   46.74
   8 -20   7   38.84   32.98
  -8  20  -8  -14.98   49.17
  -8 -20  -8  -47.87   56.18
   8 -20   8   19.37   14.75
  -8  22   9    2.12   18.76
  -8 -22   9    8.87   22.79
  -8  22   8   67.94   49.18
  -8 -22   8  161.24   48.36
  -8  22   7   35.60   15.87
  -8  22   6  518.88   49.17
  -8  22   5  244.67   24.61
  -8  22   4   93.68   19.26
   8  22  -4    5.33   59.48
   8 -22  -4   46.47   34.88
  -8  22   3  196.31   52.09
   8  22  -3  183.08   69.83
   8 -22  -3  249.91   43.83
   8  22  -2   45.21   11.42
  -8  22   2   68.68   21.98
   8  22  -2   33.09    5.90
   8  22  -2   63.05   68.26
   8 -22  -2  104.07   34.64
   8  22  -1   15.73   39.58
  -8  22   1   31.13   15.52
  -8 -22   1   35.47   21.74
   8 -22  -1   15.07   12.38
  -8  22   0  351.99   78.90
   8  22   0  303.47   81.82
   8 -22   0  245.33   56.68
   8  22   1  -24.41   59.64
  -8  22  -1   77.87   28.07
  -8 -22  -1   53.02   31.01
   8 -22   1   21.00   16.62
   8  22   2  -27.66   54.20
  -8  22  -2  -17.85   25.72
  -8 -22  -2    7.12   33.73
   8 -22   2   13.75   19.64
   8  22   3  164.23   47.02
  -8  22  -3  189.61   41.01
  -8 -22  -3  317.67   62.91
   8 -22   3  380.08   71.25
   8  22   4  253.91   62.54
  -8  22  -4  183.42   57.00
  -8 -22  -4  178.74   51.91
   8 -22   4  125.38   24.85
   8  22   5  253.22   75.52
  -8  22  -5  203.25   52.06
  -8 -22  -5  130.69   53.70
   8 -22   5  149.50   43.75
   8  22   6   40.06   33.80
  -8  22  -6    2.95   21.36
  -8 -22  -6  114.15   80.76
   8 -22   6   46.77   22.68
  -8  22  -7   26.08   47.01
  -8 -22  -7   67.20   53.71
   8 -22   7   37.57   33.91
  -8  24   8   22.94   31.36
  -8 -24   8   63.47   30.61
  -8  24   7  130.60   30.97
  -8  24   6  188.18   44.94
  -8  24   5  437.50   46.85
  -8  24   4 1748.61  203.09
   8 -24  -4  811.22  156.43
  -8  24   3   51.60   22.54
   8  24  -3  134.49   67.67
   8 -24  -3   62.93   26.91
  -8  24   2  446.09  104.58
   8  24  -2  455.20   14.01
   8  24  -2  296.29  137.50
   8 -24  -2  325.33   87.76
   8  24  -1  188.51  130.47
  -8  24   1  348.52   49.19
  -8 -24   1  193.45   88.47
   8 -24  -1  483.55   29.49
   8  24   0  331.42   93.16
  -8  24   0  398.48  114.16
  -8 -24   0  300.43   54.43
   8 -24   0  260.43   39.08
   8  24   1  587.87  101.67
  -8  24  -1  510.35  139.49
  -8 -24  -1  336.66   64.75
   8 -24   1  334.94   85.26
   8  24   2  582.37  192.27
  -8  24  -2  430.68   84.02
  -8 -24  -2  676.26  103.47
   8 -24   2  664.77  140.66
   8  24   3  142.97   67.38
  -8 -24  -3   72.25   40.09
   8 -24   3  129.75   33.16
  -8  24  -4  561.29  212.63
   8  24   4  664.38   99.14
   8 -24   4  556.66   56.09
   8  24   5  230.61   72.85
  -8  24  -5  379.76   72.09
  -8 -24  -5  200.38   53.29
   8 -24   5  212.81   40.26
  -8 -24  -6   25.85   54.19
   8 -24   6  176.49   73.51
  -8  24  -7   24.17   16.56
   8 -24   7   94.83   44.73
  -8  26   8  143.80   46.78
  -8 -26   8  343.33   79.11
  -8  26   7   53.96   25.31
  -8  26   6  151.15   48.00
  -8  26   5   25.93   20.91
  -8  26   4   52.34   23.04
  -8  26   3   80.71   27.36
   8 -26  -3   33.36   20.03
  -8  26   2   46.64   23.86
   8  26  -2   77.90   63.30
   8 -26  -2   65.47   14.35
  -8  26   1    8.78   14.18
   8  26  -1   18.75    8.82
   8  26  -1   48.71   43.01
   8 -26  -1   -1.23   12.22
   8  26   0  669.45  166.75
  -8  26   0 1066.17  196.87
  -8 -26   0  553.70  124.78
   8 -26   0  818.72   99.14
   8  26   1   20.60   47.94
  -8  26  -1   19.79   25.03
  -8 -26  -1   11.58   37.36
   8 -26   1   63.97   27.87
  -8  26  -2   64.92   46.93
   8  26   2  110.57   71.54
   8 -26   2    7.56   12.58
  -8  26  -3  197.28   47.94
  -8 -26  -3  155.69   54.18
   8 -26   3  199.69   33.70
  -8  26  -4   64.56   27.02
  -8 -26  -4   93.53   49.43
   8 -26   4   40.85   27.45
  -8 -26  -5   48.57   49.39
   8 -26   5   38.76   28.35
  -8  26  -6   78.58   41.73
  -8 -26  -6  171.82   93.51
  -8  28   7  151.98   54.88
  -8 -28   7   55.83   38.74
  -8  28   6  127.55   41.15
  -8  28   5   43.64   17.08
  -8  28   4  263.19  100.11
  -8  28   3    9.92   21.54
  -8  28   2   35.84   33.70
   8  28  -2   92.67   65.28
   8 -28  -2    1.51   10.11
  -8  28   1  410.20   88.88
   8  28  -1  307.27   74.06
   8 -28  -1  366.17   35.90
  -8  28   0  -17.19   29.72
   8  28   0   37.38   38.80
   8 -28   0   39.55   23.38
   8  28   1  306.97  136.95
  -8  28  -1  306.46   71.45
  -8 -28  -1  202.07   70.57
   8 -28   1  241.61   29.64
  -8  28  -2   30.14   25.22
   8  28   2   78.31   58.67
   8 -28   2   85.95   29.85
   8  28   3  -11.75   67.04
   8 -28   3   11.25   21.29
   8  28   4   31.81   58.86
  -8  28  -4   60.05   22.54
  -8 -28  -4   87.67   52.12
   8 -28   4   -8.38   18.81
  -8  28  -5   44.29   42.35
  -8 -28  -5   51.11   53.02
   8 -28   5   14.27   12.13
  -8  30   6   33.70   16.10
  -8 -30   6   74.71   34.32
  -8  30   5   48.40   25.66
  -8  30   3   71.58   36.10
  -8  30   2  171.23   83.38
  -8  30   1   20.90   14.05
   8  30  -1  101.58   64.07
   8 -30  -1   15.34   11.79
  -8  30   0  106.13   44.95
   8  30   0   94.37   58.01
   8 -30   0   75.90   23.31
   8  30   1  185.52   97.04
  -8  30  -1  100.56   36.82
  -8 -30  -1   25.82   31.52
  -8  30  -2  180.62   81.68
   8 -30   2  361.46   37.57
  -8  30  -3  188.28   61.62
   8 -30   3  324.72   40.09
  -8  30  -4   41.12   17.66
  -8 -30  -4  132.03   69.55
  -8  32   5   17.41   15.02
  -8  32   4   32.59   23.59
  -8  32   3  169.51   68.04
  -8  32   2   76.31   44.63
  -8  32   1    8.55   19.08
   8 -32  -1   20.48    8.69
  -8  32   0   45.67   35.14
   8 -32   0   27.23   19.16
  -8  32  -1   -6.25   28.57
   8  32   1   34.11   52.85
   8 -32   1    9.03   15.61
   8  32   2  176.94   84.52
  -8  32  -2  240.60  100.44
  -8 -32  -2  283.73   77.45
   8 -32   2  242.03   63.09
  -8  32  -3   51.63   22.20
   8 -32   3   99.53   35.04
  -8  34   3  292.88   73.21
  -8  34   2   -3.27   12.76
  -8  34   0   40.38   21.68
   8 -34   0   31.54   17.88
  -8  34  -1  139.47   46.64
   8 -34   1   71.27   19.37
  -8  34  -2   30.99   32.72
   8 -34   2   10.15   17.36
  -9   1  11   -6.47   18.68
  -9   1  10   55.09   21.63
  -9  -1  10   53.73   20.34
  -9   1   9   84.69   33.59
  -9  -1   9  124.41   26.75
  -9  -1   8   14.65    8.20
  -9   1   7  701.83   79.83
   9   1  -7  751.76  129.42
   9  -1  -7  643.98  225.39
  -9  -1   7  741.14   83.39
  -9   1   6  807.05   64.56
  -9   1   6  623.02   84.05
   9   1  -6  709.59  150.20
  -9  -1   6  424.24  159.76
   9  -1  -6  720.12  102.36
  -9  -1   6  818.44   65.26
  -9   1   5   64.51   22.35
  -9   1   5  102.25   21.09
   9   1  -5  208.99   69.88
   9  -1  -5    0.04   52.82
  -9  -1   5  152.84   43.01
   9   1  -4  409.80   68.59
  -9   1   4  336.40   47.54
   9   1  -4  375.91   41.30
   9  -1  -4  362.06   95.62
  -9  -1   4  542.45   74.62
  -9   1   3   22.16   15.30
   9   1  -3   14.82   49.39
   9   1  -3    7.34    3.27
   9  -1  -3   10.00    9.57
   9  -1  -3   -7.78   41.92
  -9  -1   3    8.44   13.72
  -9   1   2  381.61  102.00
   9   1  -2  549.42   94.61
   9   1  -2  339.40   56.63
   9  -1  -2  385.08   41.17
   9  -1  -2  372.79   66.57
  -9  -1   2  389.75  102.62
  -9   1   1  254.04   44.57
   9   1  -1  250.81   44.42
   9   1  -1   93.72   23.91
  -9  -1   1  300.13   76.73
   9  -1  -1  227.96   53.39
   9  -1  -1  179.46   35.91
  -9   1   0 1320.37  193.79
   9   1   0  743.12  161.30
   9   1   0  706.91  118.10
   9  -1   0  805.04   76.33
   9  -1   0 1067.79  215.12
  -9  -1   0 1029.80   60.94
  -9   1  -1 2096.71  146.62
   9   1   1 1856.65  127.56
   9  -1   1 1984.67  179.93
  -9  -1  -1 1668.96  118.37
  -9   1  -2  726.86   66.36
   9   1   2  942.98   99.10
  -9  -1  -2  764.22  132.98
   9  -1   2 1199.76  206.40
  -9   1  -3   59.09   34.71
   9   1   3  147.65   35.68
  -9  -1  -3   50.53   34.71
   9  -1   3   36.40   11.84
   9   1   4  645.90  145.90
  -9   1  -4  407.58   77.36
  -9  -1  -4  480.06   98.68
   9  -1   4  373.30  109.68
  -9   1  -5  265.78   65.23
   9   1   5  109.01   19.16
   9  -1   5   77.16   23.32
  -9  -1  -5  145.50   60.81
  -9   1  -6  531.48   68.00
   9   1   6  393.76   96.35
   9  -1   6  526.32   48.20
  -9  -1  -6  536.84   63.04
  -9   1  -7  150.51   64.55
   9   1   7  128.88   33.48
   9  -1   7  243.20   41.76
  -9  -1  -7   57.24   54.23
  -9   1  -8   95.04   65.62
   9   1   8  108.41   34.06
   9  -1   8  179.35   34.95
  -9  -1  -8  103.12   62.81
  -9   1  -9   35.62   61.26
   9   1   9   -1.21   14.96
   9  -1   9   18.03   20.58
  -9  -1  -9   82.64   78.85
  -9   3  10   85.73   29.81
  -9   3  10  156.34   30.85
  -9  -3  10  108.53   36.20
  -9   3   9   13.90   10.40
  -9   3   8 1105.92  137.45
  -9  -3   8 1159.56  132.92
   9   3  -7  282.70   95.75
  -9   3   7  172.73   31.13
  -9  -3   7  149.31   37.10
   9  -3  -7  209.87   93.75
  -9  -3   7  159.03   53.32
   9   3  -6  537.41  207.84
  -9   3   6  729.15   59.69
  -9  -3   6  718.46   56.96
   9  -3  -6  674.59  117.38
  -9  -3   6  687.38   43.61
  -9   3   5  115.16   29.06
  -9   3   5  341.38   64.12
   9   3  -5  459.75   93.13
  -9  -3   5  159.59   67.60
  -9  -3   5  364.16   83.41
   9  -3  -5  289.20   75.11
   9   3  -4  952.07   91.69
  -9   3   4 1140.86   85.38
   9   3  -4 1128.77   70.64
   9  -3  -4  973.54  251.39
  -9  -3   4 1295.87   85.01
  -9   3   3 1413.32  149.76
   9   3  -3  809.35  100.56
  -9  -3   3  990.78   87.12
   9  -3  -3 1214.14  167.38
   9  -3  -3 1011.86   66.70
  -9   3   2  656.68   69.30
   9   3  -2  611.64   87.47
   9   3  -2  842.60   83.41
  -9  -3   2  424.74   86.42
   9  -3  -2  602.43   70.18
   9  -3  -2  475.04   57.22
  -9   3   1 2088.90   88.13
   9   3  -1 2924.97  157.47
  -9  -3   1 2671.17  112.56
   9  -3  -1 2165.22   81.03
   9  -3  -1 1972.43   92.23
   9   3   0 1213.67  101.36
   9   3   0 1788.15  141.63
  -9   3   0 1252.01  123.18
   9  -3   0 1850.98  130.76
  -9  -3   0 1611.53  136.88
  -9   3  -1  477.41   88.13
   9   3   1  358.21   86.87
  -9  -3  -1  474.80   79.75
   9  -3   1  500.78   98.53
  -9   3  -2  461.95  121.47
   9   3   2  458.81   66.55
  -9  -3  -2  220.66   47.42
   9  -3   2  295.66   85.95
   9   3   3  146.86   42.03
  -9   3  -3   95.46   55.09
  -9  -3  -3  152.32   47.31
   9  -3   3  139.70   29.32
   9   3   4   22.63   19.26
  -9   3  -4   29.08   39.98
  -9  -3  -4    7.88   38.74
   9  -3   4   10.80   23.67
  -9   3  -5  368.34   94.55
   9   3   5  267.58   62.16
  -9  -3  -5  408.03   79.66
   9  -3   5  256.30   46.64
  -9   3  -6   73.18   53.16
   9   3   6   39.71   11.08
   9  -3   6   -9.53   18.88
  -9  -3  -6  -48.39   46.48
  -9   3  -7  116.94   65.40
   9   3   7   27.76   17.80
   9  -3   7   31.58   23.46
  -9  -3  -7   -3.04   37.53
  -9   3  -8  110.29   66.75
   9   3   8   33.40   13.90
   9  -3   8   94.11   33.37
   9   3   9    2.61   12.86
  -9   3  -9   67.80   54.71
  -9  -3  -9   46.93   69.96
  -9   5  10   27.66   15.63
  -9   5  10    0.93   18.66
  -9  -5  10   25.09   22.48
  -9   5   9  198.93   51.33
  -9   5   8  191.07   45.00
  -9  -5   8  103.62   43.28
   9   5  -7  -34.77   59.63
  -9   5   7   17.25   12.08
  -9  -5   7    4.48    3.02
   9  -5  -7   89.30   26.47
  -9  -5   7   24.14   25.34
   9   5  -6 1054.14  242.47
  -9   5   6  925.11  100.07
  -9  -5   6 1188.24  111.15
   9  -5  -6 1044.47  218.50
  -9  -5   6  873.62   90.03
  -9   5   5   33.34   14.31
   9   5  -5   80.57   65.68
  -9  -5   5    2.68    6.22
  -9  -5   5   30.61   13.27
   9  -5  -5   -1.48   34.72
   9   5  -4 1886.86  112.98
  -9   5   4 2192.62  188.34
   9   5  -4 1981.63  174.39
  -9  -5   4 1833.31  112.19
   9  -5  -4 1997.21  328.43
  -9   5   3   43.18   15.26
   9   5  -3   31.91    7.22
   9   5  -3   -6.72   46.29
  -9  -5   3    5.69   12.45
   9  -5  -3   33.72   11.44
   9  -5  -3  -21.03   36.64
   9   5  -2  334.95   94.05
  -9   5   2  457.94  103.50
   9   5  -2  369.15   63.72
   9  -5  -2  357.76   65.41
  -9  -5   2  378.34   82.53
   9  -5  -2  217.46   46.10
   9   5  -1    7.61    4.97
  -9   5   1   13.94   20.31
   9   5  -1   39.70   28.41
  -9  -5   1   -4.00   21.73
   9  -5  -1   25.06   28.39
   9   5   0 1706.71  171.66
   9   5   0 2511.42  155.30
  -9   5   0 1931.11  130.29
   9  -5   0 2624.14  175.52
  -9  -5   0 2133.51  149.98
   9   5   1  544.00  133.49
  -9   5  -1  696.49   82.08
   9   5   1  578.13   61.87
   9  -5   1  930.40  171.11
  -9  -5  -1  389.10   51.10
   9   5   2 1785.96  122.82
  -9   5  -2 1968.36  226.12
  -9  -5  -2 1814.61  130.82
   9  -5   2 1537.25  101.23
   9   5   3  736.00   85.26
  -9   5  -3  667.42  120.86
  -9  -5  -3  707.14  230.75
   9  -5   3  779.53   82.19
   9   5   4  483.78  107.13
  -9   5  -4  486.50   86.04
  -9  -5  -4  356.18   71.27
   9  -5   4  343.65  111.27
   9   5   5  142.55   34.08
  -9   5  -5   44.51   43.75
  -9  -5  -5   97.70   48.61
   9  -5   5   65.57   31.66
  -9   5  -6   91.16   34.92
   9   5   6    3.26   24.10
  -9  -5  -6   30.64   46.38
   9  -5   6   50.62   24.14
  -9   5  -7   95.43   70.61
   9   5   7   10.63   12.78
  -9  -5  -7  117.84   56.97
   9  -5   7   66.81   25.96
  -9   5  -8  346.56   71.40
   9   5   8  318.14   90.19
  -9  -5  -8  248.70   86.09
   9  -5   8  280.86   78.08
   9   5   9    9.43   21.57
  -9   5  -9   44.63   56.65
  -9  -5  -9    5.97   57.67
   9  -5   9    4.04   13.70
  -9   7  10  105.89   50.99
  -9  -7  10  244.43   56.60
  -9   7   9   56.12   18.14
  -9   7   8  515.03   88.22
  -9   7   7   -6.27   13.05
   9   7  -7  -49.39   65.80
  -9  -7   7    6.47    3.91
   9  -7  -7  -31.82   47.78
   9   7  -6  139.52   54.35
  -9   7   6  157.72   35.24
  -9  -7   6  143.56   17.92
   9  -7  -6  104.43   26.08
  -9  -7   6  125.23   30.92
  -9   7   5   29.56   17.65
   9   7  -5   72.85   39.65
  -9  -7   5   26.85   13.12
  -9  -7   5    7.01    3.84
   9  -7  -5  -23.62   35.01
   9   7  -4   47.63   10.04
  -9   7   4   75.44   14.00
   9   7  -4   -3.91   65.77
  -9   7   4   50.92   17.52
  -9  -7   4   90.97   26.87
   9  -7  -4  140.08   45.68
   9   7  -3   95.32   54.10
  -9   7   3  147.46   28.72
   9   7  -3  105.46   27.87
  -9   7   3  128.67   30.97
  -9  -7   3  177.93   27.79
   9  -7  -3  101.10   35.00
   9   7  -2   71.47   15.57
  -9   7   2  113.67   29.76
   9   7  -2   11.16   47.01
  -9  -7   2   99.18   25.00
   9  -7  -2   33.54   22.68
   9   7  -1   51.19   10.92
  -9   7   1   67.50   23.92
   9   7  -1   35.56   47.81
  -9  -7   1   48.77   24.54
   9  -7  -1  102.51   34.56
  -9   7   0  654.90  125.87
   9   7   0  612.21  120.22
   9   7   0  921.94  151.64
  -9  -7   0  647.70   74.32
   9  -7   0  876.55  138.87
[truncated: 110,845 more chars]
