# Supplementary material
Source: MDPI journal article supplement (https://www.mdpi.com/2304-6740/5/3/53)
Supplement: s1 [file s1 › New folder/2-Br123K.cif]

data_global
_audit_creation_date                               2017-04-11
_audit_creation_method                            'by CrystalStructure 4.2.2'
_audit_update_record                               ?

#==============================================================================
# PROCESSING SUMMARY (IUCr Office Use Only)

_journal_date_recd_electronic                      ?
_journal_date_from_coeditor                        ?
_journal_date_accepted                             ?
_journal_coeditor_code                             ?

#==============================================================================
# SUBMISSION DETAILS

_publ_contact_author_name                         'ENTER NAME'
_publ_contact_author_email                        'ENTER EMAIL ADDRESS'
_publ_contact_author_fax                          'ENTER FAX NUMBER'
_publ_contact_author_phone                        'ENTER PHONE NUMBER'
_publ_contact_letter
;
    ENTER TEXT OF LETTER
;
_publ_requested_journal                           'ENTER JOURNAL NAME HERE'
_publ_requested_category
                                               'CHOOSE FI FM FO CI CM CO or AD'
_publ_requested_coeditor_name                      ?

#==============================================================================
# TITLE AND AUTHOR LIST

_publ_section_title
;
    ENTER SECTION TITLE
;
_publ_section_title_footnote
;
    ENTER FOOTNOTE TO TITLE OF PAPER
;
loop_
_publ_author_name
_publ_author_footnote
_publ_author_address
' FIRST AUTHORS NAME '
;
  FIRST AUTHORS FOOTNOTES
;
;
  FIRST AUTHORS ADDRESS
;
_publ_section_synopsis
;
    ENTER SYNOPSIS
;

#==============================================================================
# TEXT

_publ_section_abstract
;
    ENTER ABSTRACT
;
_publ_section_comment
;
    ENTER TEXT
;
_publ_section_references
;
    ENTER OTHER REFERENCES

    Rigaku (2016). CrystalStructure. Version 4.2.2. 
    Rigaku Corporation, Tokyo, Japan.

    Sheldrick, G. M. (2014). Acta Cryst. (2014). A70, C1437.
    SHELXT Version 2014/5

    Sheldrick, G.M. (2008) SHELXL Version 2014/7, Acta Cryst. A64, 112-122.

    Rigaku (1998). REQAB. 
    Rigaku Corporation, Tokyo, Japan.

;
_publ_section_figure_captions
;
    ENTER FIGURE CAPTIONS
;
_publ_section_exptl_prep
;
    ENTER COMPOUND PREPARATION DETAILS
;
_publ_section_exptl_refinement
;
    ENTER SPECIAL DETAILS OF THE REFINEMENT
;

#==============================================================================
data_2-Br123K

#==============================================================================
# CHEMICAL DATA

_chemical_formula_sum                             'C34 H21 Br6 Fe N8 O10'
_chemical_formula_moiety                          'C34 H21 Br6 Fe N8 O10'
_chemical_formula_weight                           1236.86
_chemical_melting_point                            ?

#==============================================================================
# CRYSTAL DATA
_space_group_crystal_system                        monoclinic
_space_group_name_H-M_alt                         'C 1 2/c 1'
_space_group_name_Hall                            '-C 2yc'
_space_group_IT_number                             15
loop_
 _space_group_symop_operation_xyz
 'x, y, z'
 '-x, y, -z+1/2'
 'x+1/2, y+1/2, z'
 '-x+1/2, y+1/2, -z+1/2'
 '-x, -y, -z'
 'x, -y, z-1/2'
 '-x+1/2, -y+1/2, -z'
 'x+1/2, -y+1/2, z-1/2'
#------------------------------------------------------------------------------
_cell_length_a                                     12.683(7)
_cell_length_b                                     30.984(14)
_cell_length_c                                     9.633(5)
_cell_angle_alpha                                  90.0000
_cell_angle_beta                                   95.330(11)
_cell_angle_gamma                                  90.0000
_cell_volume                                       3769(3)
_cell_formula_units_Z                              4
_cell_measurement_reflns_used                      8041
_cell_measurement_theta_min                        1.31
_cell_measurement_theta_max                        30.86
_cell_measurement_temperature                      123
#------------------------------------------------------------------------------
_exptl_crystal_description                         prism
_exptl_crystal_colour                              colorless
_exptl_crystal_size_max                            0.200
_exptl_crystal_size_mid                            0.200
_exptl_crystal_size_min                            0.200
_exptl_crystal_density_diffrn                      2.179
_exptl_crystal_density_meas                        ?
_exptl_crystal_density_method                     'not measured'
_exptl_crystal_F_000                               2388.00
_exptl_absorpt_coefficient_mu                      6.850
_exptl_absorpt_correction_type                     multi-scan
_exptl_absorpt_process_details                    'REQAB (Rigaku, 1998)'
_exptl_absorpt_correction_T_min                    0.174
_exptl_absorpt_correction_T_max                    0.254

#==============================================================================
# EXPERIMENTAL DATA

_diffrn_ambient_temperature                        123
_diffrn_radiation_type                            'Mo K\a'
_diffrn_radiation_wavelength                       0.71075
_diffrn_measurement_device_type                   'Rigaku Saturn724'
_diffrn_measurement_method                         \w
_diffrn_detector_area_resol_mean                   14.222
_diffrn_reflns_number                              17268
_diffrn_reflns_av_R_equivalents                    0.1157
_diffrn_reflns_theta_max                           27.483
_diffrn_reflns_theta_min                           3.220
_diffrn_reflns_theta_full                          25.242
_diffrn_measured_fraction_theta_max                0.992
_diffrn_measured_fraction_theta_full               0.998
_diffrn_reflns_Laue_measured_fraction_max          0.992
_diffrn_reflns_Laue_measured_fraction_full         0.998
_diffrn_reflns_point_group_measured_fraction_max   0.992
_diffrn_reflns_point_group_measured_fraction_full  0.998
_diffrn_reflns_limit_h_min                        -16
_diffrn_reflns_limit_h_max                         16
_diffrn_reflns_limit_k_min                        -39
_diffrn_reflns_limit_k_max                         39
_diffrn_reflns_limit_l_min                        -12
_diffrn_reflns_limit_l_max                         12
_diffrn_standards_number                           0
_diffrn_standards_interval_count                   .
_diffrn_standards_decay_%                          ?
_reflns_number_total                               4309
_reflns_number_gt                                  3973
_reflns_threshold_expression                       F^2^>2.0\s(F^2^)
_reflns_Friedel_coverage          0.000
_reflns_Friedel_fraction_max      .
_reflns_Friedel_fraction_full     .

#==============================================================================
# REFINEMENT DATA

_refine_special_details
;
    Refinement was performed using all reflections. The weighted 
    R-factor (wR) and goodness of fit (S) are based on F^2^.
    R-factor (gt) are based on F. The threshold expression of
    F^2^ > 2.0 sigma(F^2^) is used only for calculating R-factor (gt).
;
_refine_ls_structure_factor_coef                   Fsqd
_refine_ls_R_factor_all                            0.0620
_refine_ls_R_factor_gt                             0.0579
_refine_ls_wR_factor_ref                           0.1615
_refine_ls_wR_factor_gt                            0.1569
_refine_ls_number_restraints                       0
_refine_ls_hydrogen_treatment                      mixed
_refine_ls_number_reflns                           4309
_refine_ls_number_parameters                       270
_refine_ls_goodness_of_fit_ref                     1.116
_refine_ls_weighting_scheme                        calc
_refine_ls_weighting_details
          'w = 1/[\s^2^(Fo^2^)+(0.0847P)^2^+17.4565P] where P=(Fo^2^+2Fc^2^)/3'
_atom_sites_solution_hydrogens                     geom
_atom_sites_solution_primary                       direct
_atom_sites_solution_secondary                     difmap
_refine_ls_shift/su_max                            0.001
_refine_diff_density_max                           1.22
_refine_diff_density_min                          -1.95
_refine_ls_extinction_method                       none
_refine_ls_extinction_coef                         ?

loop_
_atom_type_symbol
_atom_type_description
_atom_type_scat_dispersion_real
_atom_type_scat_dispersion_imag
_atom_type_scat_source
  'C' 'C'  0.0033 0.0016 
;
International Tables for Crystallography
(Vol. C, Tables 4.2.6.8 and 6.1.1.4)
;
  'H' 'H'  0.0000 0.0000 
;
International Tables for Crystallography
(Vol. C, Table 6.1.1.4)
;
  'N' 'N'  0.0061 0.0033 
;
International Tables for Crystallography
(Vol. C, Tables 4.2.6.8 and 6.1.1.4)
;
  'O' 'O'  0.0106 0.0060 
;
International Tables for Crystallography
(Vol. C, Tables 4.2.6.8 and 6.1.1.4)
;
  'Fe' 'Fe'  0.3463 0.8444 
;
International Tables for Crystallography
(Vol. C, Tables 4.2.6.8 and 6.1.1.4)
;
  'Br' 'Br'  -0.2901 2.4595 
;
International Tables for Crystallography
(Vol. C, Tables 4.2.6.8 and 6.1.1.4)
;

#==============================================================================
# ATOMIC COORDINATES AND THERMAL PARAMETERS

loop_
 _atom_site_label
 _atom_site_type_symbol
 _atom_site_fract_x
 _atom_site_fract_y
 _atom_site_fract_z
 _atom_site_U_iso_or_equiv
 _atom_site_adp_type
 _atom_site_occupancy
 _atom_site_site_symmetry_order  
 _atom_site_calc_flag
 _atom_site_refinement_flags_posn
 _atom_site_refinement_flags_adp
 _atom_site_refinement_flags_occupancy
 _atom_site_disorder_assembly
 _atom_site_disorder_group
Br1 Br 0.94700(4) 0.39824(2) 0.42495(5) 0.01930(17) Uani 1 1 d . . . . .
Br2 Br 0.81492(4) 0.47774(2) 0.24912(5) 0.01986(17) Uani 1 1 d . . . . .
Br3 Br 0.85895(4) 0.83622(2) 0.74979(5) 0.02568(18) Uani 1 1 d . . . . .
Fe1 Fe 0.5000 0.65314(3) 0.7500 0.0142(2) Uani 1 2 d S T P . .
O1 O 0.5565(3) 0.69446(12) 0.8762(3) 0.0181(7) Uani 1 1 d . . . . .
O2 O 0.4533(3) 0.75824(16) 0.9841(5) 0.0366(11) Uani 1 1 d . . . . .
O3 O 0.5643(3) 0.80212(13) 1.0944(4) 0.0226(8) Uani 1 1 d . . . . .
O4 O 0.7846(3) 0.57439(12) 0.4127(4) 0.0221(8) Uani 1 1 d . . . . .
O5 O 0.9056(3) 0.59250(13) 0.2695(4) 0.0240(8) Uani 1 1 d . . . . .
N1 N 0.4598(3) 0.60702(14) 0.6129(4) 0.0179(8) Uani 1 1 d . . . . .
N2 N 0.6382(3) 0.61199(14) 0.5883(4) 0.0184(8) Uani 1 1 d . . . . .
H5 H 0.6990 0.6006 0.5705 0.022 Uiso 1 1 calc R U . . .
N3 N 0.6301(3) 0.65081(13) 0.6611(4) 0.0158(8) Uani 1 1 d . . . . .
N4 N 0.5404(3) 0.77570(15) 1.0016(4) 0.0208(9) Uani 1 1 d . . . . .
C1 C 0.5418(4) 0.59350(17) 0.5472(5) 0.0182(10) Uani 1 1 d . . . . .
C2 C 0.5312(4) 0.56038(17) 0.4451(5) 0.0225(10) Uani 1 1 d . . . . .
H1 H 0.5908 0.5495 0.4034 0.027 Uiso 1 1 calc R U . . .
C3 C 0.4315(4) 0.54485(19) 0.4094(5) 0.0248(11) Uani 1 1 d . . . . .
H2 H 0.4214 0.5231 0.3401 0.030 Uiso 1 1 calc R U . . .
C4 C 0.3445(4) 0.56023(19) 0.4722(5) 0.0252(11) Uani 1 1 d . . . . .
H3 H 0.2752 0.5496 0.4458 0.030 Uiso 1 1 calc R U . . .
C5 C 0.3620(4) 0.59149(18) 0.5743(5) 0.0219(10) Uani 1 1 d . . . . .
H4 H 0.3035 0.6023 0.6185 0.026 Uiso 1 1 calc R U . . .
C6 C 0.7104(4) 0.67660(17) 0.6734(5) 0.0170(10) Uani 1 1 d . . . . .
C7 C 0.8109(4) 0.66467(17) 0.6127(5) 0.0190(10) Uani 1 1 d . . . . .
H6A H 0.8282 0.6345 0.6347 0.023 Uiso 1 1 calc R U . . .
H7C H 0.8685 0.6833 0.6523 0.023 Uiso 1 1 calc R U . . .
H8B H 0.8017 0.6685 0.5113 0.023 Uiso 1 1 calc R U . . .
C8 C 0.7007(4) 0.71817(16) 0.7469(4) 0.0158(9) Uani 1 1 d . . . . .
C9 C 0.7693(4) 0.75194(17) 0.7217(5) 0.0180(10) Uani 1 1 d . . . . .
H9 H 0.8215 0.7476 0.6584 0.022 Uiso 1 1 calc R U . . .
C10 C 0.7630(4) 0.79184(17) 0.7871(5) 0.0184(10) Uani 1 1 d . . . . .
C11 C 0.6876(4) 0.79870(17) 0.8790(5) 0.0202(10) Uani 1 1 d . . . . .
H10 H 0.6833 0.8257 0.9248 0.024 Uiso 1 1 calc R U . . .
C12 C 0.6187(4) 0.76584(15) 0.9034(5) 0.0149(9) Uani 1 1 d . . . . .
C13 C 0.6204(4) 0.72462(16) 0.8411(5) 0.0176(10) Uani 1 1 d . . . . .
C14 C 0.8713(4) 0.56968(16) 0.3666(5) 0.0172(9) Uani 1 1 d . . . . .
C15 C 0.9412(4) 0.53341(17) 0.4297(5) 0.0173(10) Uani 1 1 d . . . . .
C16 C 0.9195(4) 0.49039(17) 0.3972(5) 0.0179(10) Uani 1 1 d . . . . .
C17 C 0.9766(4) 0.45700(16) 0.4665(5) 0.0160(9) Uani 1 1 d . . . . .
H11 H 1.0000 0.587(3) 0.2500 0.03(2) Uiso 1 2 d S . P . .

loop_
 _atom_site_aniso_label
 _atom_site_aniso_U_11
 _atom_site_aniso_U_22
 _atom_site_aniso_U_33
 _atom_site_aniso_U_23
 _atom_site_aniso_U_13
 _atom_site_aniso_U_12
Br1 0.0218(3) 0.0172(3) 0.0190(3) -0.00129(17) 0.00260(19) 0.00027(19)
Br2 0.0192(3) 0.0230(3) 0.0169(2) 0.00049(17) -0.00087(18) -0.00095(19)
Br3 0.0254(3) 0.0246(3) 0.0274(3) 0.0011(2) 0.0048(2) -0.0093(2)
Fe1 0.0135(5) 0.0162(5) 0.0134(4) 0.000 0.0038(3) 0.000
O1 0.0204(17) 0.0197(19) 0.0153(15) -0.0026(13) 0.0079(12) -0.0015(14)
O2 0.023(2) 0.042(3) 0.046(2) -0.018(2) 0.0164(18) -0.012(2)
O3 0.0254(18) 0.025(2) 0.0174(16) -0.0057(14) 0.0012(13) 0.0015(16)
O4 0.0177(17) 0.026(2) 0.0238(17) 0.0020(15) 0.0071(13) 0.0056(15)
O5 0.0230(18) 0.026(2) 0.0232(18) 0.0079(15) 0.0056(14) 0.0033(17)
N1 0.0164(19) 0.020(2) 0.0180(18) 0.0017(16) 0.0066(15) 0.0003(17)
N2 0.017(2) 0.018(2) 0.021(2) -0.0048(16) 0.0064(15) 0.0004(17)
N3 0.0164(19) 0.016(2) 0.0155(17) -0.0012(15) 0.0045(14) -0.0012(17)
N4 0.019(2) 0.025(2) 0.0189(19) -0.0034(16) 0.0042(16) 0.0000(19)
C1 0.020(2) 0.018(2) 0.018(2) 0.0018(19) 0.0065(17) 0.002(2)
C2 0.028(3) 0.018(2) 0.023(2) -0.005(2) 0.010(2) -0.001(2)
C3 0.031(3) 0.027(3) 0.017(2) -0.004(2) 0.005(2) -0.002(2)
C4 0.028(3) 0.027(3) 0.020(2) 0.000(2) 0.001(2) -0.011(2)
C5 0.018(2) 0.026(3) 0.022(2) -0.004(2) 0.0025(18) -0.008(2)
C6 0.016(2) 0.025(3) 0.0104(19) 0.0055(17) 0.0049(15) 0.001(2)
C7 0.014(2) 0.021(3) 0.022(2) -0.0062(19) 0.0043(17) 0.001(2)
C8 0.016(2) 0.017(2) 0.014(2) 0.0033(17) 0.0029(17) -0.0002(19)
C9 0.017(2) 0.020(3) 0.016(2) -0.0016(18) 0.0030(17) -0.001(2)
C10 0.016(2) 0.020(3) 0.019(2) 0.0003(18) 0.0020(17) -0.004(2)
C11 0.021(2) 0.018(2) 0.021(2) 0.0011(19) -0.0010(18) 0.000(2)
C12 0.015(2) 0.013(2) 0.017(2) -0.0007(17) 0.0031(16) 0.0042(19)
C13 0.018(2) 0.019(2) 0.016(2) 0.0042(18) 0.0021(17) 0.002(2)
C14 0.018(2) 0.017(2) 0.017(2) -0.0035(18) 0.0031(17) 0.002(2)
C15 0.016(2) 0.022(3) 0.016(2) 0.0014(18) 0.0069(17) 0.005(2)
C16 0.017(2) 0.023(3) 0.014(2) 0.0025(18) 0.0046(17) 0.002(2)
C17 0.016(2) 0.017(2) 0.016(2) 0.0019(17) 0.0024(16) -0.0012(19)

#==============================================================================
_computing_data_collection
                                             'CrystalClear (Rigaku Inc., 2008)'
_computing_cell_refinement                         CrystalClear
_computing_data_reduction                          CrystalClear
_computing_structure_solution
                                      'SHELXT Version 2014/5 (Sheldrick, 2014)'
_computing_structure_refinement
                                      'SHELXL Version 2014/7 (Sheldrick, 2008)'
_computing_publication_material
                                        'CrystalStructure 4.2.2 (Rigaku, 2016)'
_computing_molecular_graphics                     'CrystalStructure 4.2.2'

#==============================================================================
# MOLECULAR GEOMETRY

_geom_special_details
;
 All esds (except the esd in the dihedral angle between two l.s. planes)
 are estimated using the full covariance matrix.  The cell esds are taken
 into account individually in the estimation of esds in distances, angles
 and torsion angles; correlations between esds in cell parameters are only
 used when they are defined by crystal symmetry.  An approximate (isotropic)
 treatment of cell esds is used for estimating esds involving l.s. planes.
;

loop_
 _geom_bond_atom_site_label_1
 _geom_bond_atom_site_label_2
 _geom_bond_distance
 _geom_bond_site_symmetry_2
 _geom_bond_publ_flag
Br1 C17 1.894(5) . ?
Br2 C16 1.897(5) . ?
Br3 C10 1.892(5) . ?
Fe1 O1 1.862(4) 2_656 ?
Fe1 O1 1.862(4) . ?
Fe1 N3 1.929(4) . ?
Fe1 N3 1.929(4) 2_656 ?
Fe1 N1 1.980(5) . ?
Fe1 N1 1.980(4) 2_656 ?
O1 C13 1.302(6) . ?
O2 N4 1.227(6) . ?
O3 N4 1.229(6) . ?
O4 C14 1.233(6) . ?
O5 C14 1.280(6) . ?
O5 H11 1.239(13) . ?
N1 C1 1.334(6) . ?
N1 C5 1.351(7) . ?
N2 C1 1.374(7) . ?
N2 N3 1.401(6) . ?
N2 H5 0.8800 . ?
N3 C6 1.292(7) . ?
N4 C12 1.466(6) . ?
C1 C2 1.420(7) . ?
C2 C3 1.367(8) . ?
C2 H1 0.9500 . ?
C3 C4 1.391(8) . ?
C3 H2 0.9500 . ?
C4 C5 1.384(7) . ?
C4 H3 0.9500 . ?
C5 H4 0.9500 . ?
C6 C8 1.480(7) . ?
C6 C7 1.497(6) . ?
C7 H6A 0.9800 . ?
C7 H7C 0.9800 . ?
C7 H8B 0.9800 . ?
C8 C9 1.397(7) . ?
C8 C13 1.439(6) . ?
C9 C10 1.393(7) . ?
C9 H9 0.9500 . ?
C10 C11 1.379(7) . ?
C11 C12 1.376(7) . ?
C11 H10 0.9500 . ?
C12 C13 1.412(7) . ?
C14 C15 1.523(7) . ?
C15 C16 1.391(7) . ?
C15 C17 1.408(7) 5_766 ?
C16 C17 1.396(7) . ?
C17 C15 1.408(7) 5_766 ?

loop_
 _geom_angle_atom_site_label_1
 _geom_angle_atom_site_label_2
 _geom_angle_atom_site_label_3
 _geom_angle
 _geom_angle_site_symmetry_1
 _geom_angle_site_symmetry_3
 _geom_angle_publ_flag
O1 Fe1 O1 93.1(2) 2_656 . ?
O1 Fe1 N3 91.68(16) 2_656 . ?
O1 Fe1 N3 91.27(16) . . ?
O1 Fe1 N3 91.27(16) 2_656 2_656 ?
O1 Fe1 N3 91.68(16) . 2_656 ?
N3 Fe1 N3 175.7(3) . 2_656 ?
O1 Fe1 N1 90.08(17) 2_656 . ?
O1 Fe1 N1 172.30(16) . . ?
N3 Fe1 N1 81.65(17) . . ?
N3 Fe1 N1 95.24(17) 2_656 . ?
O1 Fe1 N1 172.30(16) 2_656 2_656 ?
O1 Fe1 N1 90.08(17) . 2_656 ?
N3 Fe1 N1 95.24(17) . 2_656 ?
N3 Fe1 N1 81.65(17) 2_656 2_656 ?
N1 Fe1 N1 87.6(2) . 2_656 ?
C13 O1 Fe1 122.4(3) . . ?
C14 O5 H11 116(3) . . ?
C1 N1 C5 119.6(5) . . ?
C1 N1 Fe1 112.3(3) . . ?
C5 N1 Fe1 127.9(4) . . ?
C1 N2 N3 113.4(4) . . ?
C1 N2 H5 123.3 . . ?
N3 N2 H5 123.3 . . ?
C6 N3 N2 118.9(4) . . ?
C6 N3 Fe1 129.5(3) . . ?
N2 N3 Fe1 111.1(3) . . ?
O2 N4 O3 123.5(4) . . ?
O2 N4 C12 118.3(4) . . ?
O3 N4 C12 118.2(4) . . ?
N1 C1 N2 116.4(5) . . ?
N1 C1 C2 121.9(5) . . ?
N2 C1 C2 121.7(4) . . ?
C3 C2 C1 117.0(5) . . ?
C3 C2 H1 121.5 . . ?
C1 C2 H1 121.5 . . ?
C2 C3 C4 121.5(5) . . ?
C2 C3 H2 119.2 . . ?
C4 C3 H2 119.2 . . ?
C5 C4 C3 117.9(5) . . ?
C5 C4 H3 121.1 . . ?
C3 C4 H3 121.1 . . ?
N1 C5 C4 121.9(5) . . ?
N1 C5 H4 119.1 . . ?
C4 C5 H4 119.1 . . ?
N3 C6 C8 118.8(4) . . ?
N3 C6 C7 120.3(5) . . ?
C8 C6 C7 120.9(4) . . ?
C6 C7 H6A 109.5 . . ?
C6 C7 H7C 109.5 . . ?
H6A C7 H7C 109.5 . . ?
C6 C7 H8B 109.5 . . ?
H6A C7 H8B 109.5 . . ?
H7C C7 H8B 109.5 . . ?
C9 C8 C13 119.6(5) . . ?
C9 C8 C6 119.2(4) . . ?
C13 C8 C6 121.2(4) . . ?
C10 C9 C8 121.6(4) . . ?
C10 C9 H9 119.2 . . ?
C8 C9 H9 119.2 . . ?
C11 C10 C9 120.0(5) . . ?
C11 C10 Br3 120.4(4) . . ?
C9 C10 Br3 119.6(4) . . ?
C12 C11 C10 119.0(5) . . ?
C12 C11 H10 120.5 . . ?
C10 C11 H10 120.5 . . ?
C11 C12 C13 124.2(4) . . ?
C11 C12 N4 115.8(4) . . ?
C13 C12 N4 120.0(4) . . ?
O1 C13 C12 120.3(4) . . ?
O1 C13 C8 123.9(5) . . ?
C12 C13 C8 115.7(4) . . ?
O4 C14 O5 125.0(5) . . ?
O4 C14 C15 116.7(4) . . ?
O5 C14 C15 118.3(4) . . ?
C16 C15 C17 118.7(5) . 5_766 ?
C16 C15 C14 121.5(4) . . ?
C17 C15 C14 119.6(5) 5_766 . ?
C15 C16 C17 121.3(4) . . ?
C15 C16 Br2 118.5(4) . . ?
C17 C16 Br2 120.1(4) . . ?
C16 C17 C15 120.0(5) . 5_766 ?
C16 C17 Br1 121.8(4) . . ?
C15 C17 Br1 118.2(4) 5_766 . ?

loop_
 _geom_torsion_atom_site_label_1
 _geom_torsion_atom_site_label_2
 _geom_torsion_atom_site_label_3
 _geom_torsion_atom_site_label_4
 _geom_torsion
 _geom_torsion_site_symmetry_1
 _geom_torsion_site_symmetry_2
 _geom_torsion_site_symmetry_3
 _geom_torsion_site_symmetry_4
 _geom_torsion_publ_flag
O1 Fe1 O1 C13 -55.2(3) 2_656 . . . ?
N3 Fe1 O1 C13 36.5(4) . . . . ?
N3 Fe1 O1 C13 -146.6(4) 2_656 . . . ?
N1 Fe1 O1 C13 131.8(4) 2_656 . . . ?
C1 N2 N3 C6 -162.3(4) . . . . ?
C1 N2 N3 Fe1 25.3(5) . . . . ?
C5 N1 C1 N2 177.4(5) . . . . ?
Fe1 N1 C1 N2 2.5(6) . . . . ?
C5 N1 C1 C2 -5.5(8) . . . . ?
Fe1 N1 C1 C2 179.6(4) . . . . ?
N3 N2 C1 N1 -18.4(6) . . . . ?
N3 N2 C1 C2 164.5(4) . . . . ?
N1 C1 C2 C3 4.5(8) . . . . ?
N2 C1 C2 C3 -178.5(5) . . . . ?
C1 C2 C3 C4 -1.2(8) . . . . ?
C2 C3 C4 C5 -1.0(8) . . . . ?
C1 N1 C5 C4 3.1(8) . . . . ?
Fe1 N1 C5 C4 177.2(4) . . . . ?
C3 C4 C5 N1 0.1(8) . . . . ?
N2 N3 C6 C8 178.2(4) . . . . ?
Fe1 N3 C6 C8 -10.9(6) . . . . ?
N2 N3 C6 C7 -1.0(7) . . . . ?
Fe1 N3 C6 C7 169.8(3) . . . . ?
N3 C6 C8 C9 -158.4(4) . . . . ?
C7 C6 C8 C9 20.8(6) . . . . ?
N3 C6 C8 C13 20.1(7) . . . . ?
C7 C6 C8 C13 -160.6(4) . . . . ?
C13 C8 C9 C10 0.9(7) . . . . ?
C6 C8 C9 C10 179.5(4) . . . . ?
C8 C9 C10 C11 -0.1(7) . . . . ?
C8 C9 C10 Br3 179.5(4) . . . . ?
C9 C10 C11 C12 -0.7(7) . . . . ?
Br3 C10 C11 C12 179.7(4) . . . . ?
C10 C11 C12 C13 0.8(7) . . . . ?
C10 C11 C12 N4 -179.6(4) . . . . ?
O2 N4 C12 C11 148.2(5) . . . . ?
O3 N4 C12 C11 -29.4(6) . . . . ?
O2 N4 C12 C13 -32.1(7) . . . . ?
O3 N4 C12 C13 150.3(5) . . . . ?
Fe1 O1 C13 C12 146.6(4) . . . . ?
Fe1 O1 C13 C8 -37.9(6) . . . . ?
C11 C12 C13 O1 175.8(5) . . . . ?
N4 C12 C13 O1 -3.8(7) . . . . ?
C11 C12 C13 C8 0.0(7) . . . . ?
N4 C12 C13 C8 -179.7(4) . . . . ?
C9 C8 C13 O1 -176.5(4) . . . . ?
C6 C8 C13 O1 5.0(7) . . . . ?
C9 C8 C13 C12 -0.8(7) . . . . ?
C6 C8 C13 C12 -179.4(4) . . . . ?
O4 C14 C15 C16 74.4(6) . . . . ?
O5 C14 C15 C16 -104.8(5) . . . . ?
O4 C14 C15 C17 -99.1(5) . . . 5_766 ?
O5 C14 C15 C17 81.7(6) . . . 5_766 ?
C17 C15 C16 C17 0.7(7) 5_766 . . . ?
C14 C15 C16 C17 -172.9(4) . . . . ?
C17 C15 C16 Br2 -176.0(3) 5_766 . . . ?
C14 C15 C16 Br2 10.4(6) . . . . ?
C15 C16 C17 C15 -0.7(7) . . . 5_766 ?
Br2 C16 C17 C15 175.9(3) . . . 5_766 ?
C15 C16 C17 Br1 179.3(3) . . . . ?
Br2 C16 C17 Br1 -4.1(5) . . . . ?

#==============================================================================
loop_
_geom_hbond_atom_site_label_D
_geom_hbond_atom_site_label_H
_geom_hbond_atom_site_label_A
_geom_hbond_site_symmetry_D
_geom_hbond_site_symmetry_H
_geom_hbond_site_symmetry_A
_geom_hbond_distance_DA
_geom_hbond_distance_DH
_geom_hbond_distance_HA
_geom_hbond_angle_DHA
_geom_hbond_publ_flag
N2 H5 O4 . . . 2.872(6) 0.880 2.110 144.4 no
N2 H5 N3 . . . 1.401(6) 0.880 2.023 35.4 no

#==============================================================================
# Additional structures and associated data_? identifiers
# should be added at this point if there is more than one 
# structure analysis in the CIF.

_shelx_res_file
;

    shelxl.res created by SHELXL-2014/7

TITL fr1385
CELL  0.71075 12.68270 30.98420 9.63350 90.00000 95.33040 90.00000
ZERR  4 0.00660 0.01390 0.00480 0.00000 0.01130 0.00000
LATT 7
SYMM    -X,    +Y, .50-Z
SFAC C H N O FE BR
UNIT 136 84 32 40 4 24
L.S. 10
FMAP 2
PLAN 25
WPDB -2
HTAB
BOND $H
CONF
LIST 4
TEMP -149.8
ACTA
SIZE 0.200 0.200 0.200
WGHT    0.084700   17.456499
FVAR       0.15670
BR1   6    0.946996    0.398241    0.424946    11.00000    0.02185    0.01719 =
         0.01899   -0.00129    0.00260    0.00027
BR2   6    0.814923    0.477737    0.249122    11.00000    0.01924    0.02296 =
         0.01689    0.00049   -0.00087   -0.00095
BR3   6    0.858953    0.836218    0.749787    11.00000    0.02545    0.02459 =
         0.02743    0.00113    0.00477   -0.00925
FE1   5    0.500000    0.653138    0.750000    10.50000    0.01346    0.01624 =
         0.01344    0.00000    0.00381    0.00000
O1    4    0.556529    0.694457    0.876165    11.00000    0.02042    0.01973 =
         0.01530   -0.00257    0.00795   -0.00151
O2    4    0.453345    0.758244    0.984080    11.00000    0.02337    0.04244 =
         0.04643   -0.01824    0.01635   -0.01172
O3    4    0.564335    0.802119    1.094422    11.00000    0.02545    0.02487 =
         0.01739   -0.00574    0.00121    0.00149
O4    4    0.784557    0.574389    0.412707    11.00000    0.01774    0.02577 =
         0.02383    0.00200    0.00714    0.00564
O5    4    0.905615    0.592500    0.269508    11.00000    0.02296    0.02631 =
         0.02322    0.00788    0.00556    0.00332
N1    3    0.459839    0.607016    0.612949    11.00000    0.01635    0.02035 =
         0.01803    0.00172    0.00657    0.00028
N2    3    0.638155    0.611986    0.588258    11.00000    0.01747    0.01784 =
         0.02065   -0.00482    0.00640    0.00039
AFIX  43
H5    2    0.698992    0.600558    0.570522    11.00000   -1.20000
AFIX   0
N3    3    0.630074    0.650810    0.661124    11.00000    0.01638    0.01612 =
         0.01551   -0.00119    0.00453   -0.00119
N4    3    0.540437    0.775699    1.001581    11.00000    0.01918    0.02473 =
         0.01894   -0.00343    0.00424   -0.00001
C1    1    0.541775    0.593504    0.547206    11.00000    0.02017    0.01780 =
         0.01759    0.00179    0.00655    0.00205
C2    1    0.531221    0.560375    0.445065    11.00000    0.02762    0.01810 =
         0.02316   -0.00527    0.00966   -0.00054
AFIX  43
H1    2    0.590799    0.549480    0.403386    11.00000   -1.20000
AFIX   0
C3    1    0.431486    0.544854    0.409369    11.00000    0.03075    0.02675 =
         0.01733   -0.00382    0.00500   -0.00239
AFIX  43
H2    2    0.421365    0.523059    0.340051    11.00000   -1.20000
AFIX   0
C4    1    0.344471    0.560230    0.472177    11.00000    0.02844    0.02694 =
         0.02008   -0.00041    0.00084   -0.01075
AFIX  43
H3    2    0.275232    0.549611    0.445793    11.00000   -1.20000
AFIX   0
C5    1    0.361990    0.591488    0.574323    11.00000    0.01788    0.02554 =
         0.02244   -0.00401    0.00251   -0.00838
AFIX  43
H4    2    0.303535    0.602332    0.618527    11.00000   -1.20000
AFIX   0
C6    1    0.710433    0.676597    0.673420    11.00000    0.01644    0.02488 =
         0.01035    0.00547    0.00492    0.00138
C7    1    0.810875    0.664673    0.612660    11.00000    0.01437    0.02100 =
         0.02226   -0.00616    0.00433    0.00061
AFIX 137
H6A   2    0.828226    0.634470    0.634651    11.00000   -1.20000
H7C   2    0.868493    0.683284    0.652286    11.00000   -1.20000
H8B   2    0.801669    0.668458    0.511260    11.00000   -1.20000
AFIX   0
C8    1    0.700683    0.718170    0.746874    11.00000    0.01613    0.01718 =
         0.01423    0.00332    0.00290   -0.00020
C9    1    0.769292    0.751941    0.721657    11.00000    0.01746    0.02030 =
         0.01648   -0.00161    0.00304   -0.00138
AFIX  43
H9    2    0.821479    0.747605    0.658394    11.00000   -1.20000
AFIX   0
C10   1    0.763017    0.791842    0.787077    11.00000    0.01591    0.02008 =
         0.01929    0.00026    0.00201   -0.00396
C11   1    0.687637    0.798697    0.878984    11.00000    0.02076    0.01839 =
         0.02082    0.00107   -0.00101    0.00022
AFIX  43
H10   2    0.683327    0.825702    0.924809    11.00000   -1.20000
AFIX   0
C12   1    0.618731    0.765842    0.903361    11.00000    0.01493    0.01348 =
         0.01671   -0.00066    0.00308    0.00417
C13   1    0.620396    0.724622    0.841067    11.00000    0.01813    0.01899 =
         0.01573    0.00417    0.00211    0.00204
C14   1    0.871267    0.569683    0.366559    11.00000    0.01808    0.01670 =
         0.01701   -0.00348    0.00309    0.00216
C15   1    0.941192    0.533411    0.429688    11.00000    0.01566    0.02157 =
         0.01581    0.00142    0.00693    0.00495
C16   1    0.919494    0.490391    0.397236    11.00000    0.01737    0.02282 =
         0.01414    0.00251    0.00457    0.00173
C17   1    0.976634    0.457004    0.466454    11.00000    0.01552    0.01699 =
         0.01572    0.00189    0.00242   -0.00123
H11   2    1.000000    0.587269    0.250000    10.50000    0.02502
HKLF 4

REM  fr1385
REM R1 =  0.0579 for    3973 Fo > 4sig(Fo)  and  0.0620 for all    4309 data
REM    270 parameters refined using      0 restraints

END

WGHT      0.0846     17.4645

REM Instructions for potential hydrogen bonds
HTAB N2 O4
HTAB C2 O4
EQIV $1 -x+1, y, -z+1/2
HTAB C4 Br2_$1
EQIV $2 -x+1, y, -z+3/2
HTAB C5 N3_$2
EQIV $3 -x+2, -y+1, -z+1
HTAB C7 Br1_$3
EQIV $4 -x+3/2, -y+3/2, -z+2
HTAB C7 O3_$4
EQIV $5 x+1/2, -y+3/2, z-1/2
HTAB C7 O3_$5
EQIV $6 -x+3/2, -y+3/2, -z+1
HTAB C7 Br3_$6
HTAB C9 O2_$5
EQIV $7 -x+2, y, -z+1/2
HTAB O5 O5_$7

REM Highest difference peak  1.224,  deepest hole -1.950,  1-sigma level  0.265
Q1    1   0.9558  0.3983  0.3199  11.00000  0.05    1.22
Q2    1   0.8268  0.4769  0.1282  11.00000  0.05    1.19
Q3    1   0.8565  0.8370  0.6282  11.00000  0.05    1.04
Q4    1   0.8045  0.4789  0.3609  11.00000  0.05    1.03
Q5    1   0.8102  0.4798  0.0456  11.00000  0.05    0.87
Q6    1   0.9358  0.5999  0.7159  11.00000  0.05    0.86
Q7    1   0.9462  0.5595  0.2026  11.00000  0.05    0.84
Q8    1   0.9393  0.3992  0.5370  11.00000  0.05    0.82
Q9    1   0.2791  0.5224  0.4109  11.00000  0.05    0.81
Q10   1   0.4987  0.6518  0.8559  11.00000  0.05    0.81
Q11   1   0.9161  0.6473  0.6483  11.00000  0.05    0.80
Q12   1   0.8677  0.8713  0.6709  11.00000  0.05    0.79
Q13   1   1.0000  0.7604  0.7500  10.50000  0.05    0.77
Q14   1   0.6785  0.6474  0.4749  11.00000  0.05    0.76
Q15   1   1.0000  0.6626  0.2500  10.50000  0.05    0.75
Q16   1   0.8847  0.4810  0.5039  11.00000  0.05    0.75
Q17   1   0.9663  0.8325  0.9269  11.00000  0.05    0.73
Q18   1   0.4353  0.5984  0.7410  11.00000  0.05    0.73
Q19   1   0.9021  0.5939  0.6551  11.00000  0.05    0.73
Q20   1   0.7650  0.8388  0.6362  11.00000  0.05    0.72
Q21   1   0.2052  0.5124  0.4631  11.00000  0.05    0.71
Q22   1   0.7201  0.4773  0.0965  11.00000  0.05    0.70
Q23   1   0.6842  0.6100  0.5075  11.00000  0.05    0.70
Q24   1   0.8769  0.4199  0.5698  11.00000  0.05    0.70
Q25   1   0.2389  0.6008  0.6470  11.00000  0.05    0.70
;

_shelx_res_checksum   70633

_shelx_hkl_file
;
   0   0  -2 1531.90   17.33
   0   0  -2 1634.25   18.33
   0   0   3   -0.24    1.52
   0   0  -3    1.01    1.42
   0   0  -3    6.29    2.36
   0   0   3    3.50    1.72
   0   0  -4 1989.65   23.15
   0   0   4 1830.36   21.43
   0   0   5    0.44    2.16
   0   0  -5    2.56    1.42
   0   0  -5    2.52    2.51
   0   0   5    4.29    1.98
   0   0   6 9999.00  573.36
   0   0  -6 9144.31  524.32
   0   0  -6 8780.12  503.48
   0   0   6 9683.27  555.18
   0   0   7   10.31    3.10
   0   0  -7    9.29    2.88
   0   0   8 1409.24   25.03
   0   0  -8 1472.84   25.61
   0   0   9   15.65    7.04
   0   0  -9    1.95    1.47
   0   0  10  889.75   38.96
   0   0 -10  981.45   40.51
   0   0  11    0.25    4.10
   0   0 -11    0.83    3.72
   0   0  12 1450.82   16.99
   0   0 -12 1440.75   97.25
   0   2  -2  275.73    4.23
   0   2  -2  261.55    4.06
   0   2   2  272.98    4.67
   0   2   2  242.90    3.65
   0  -2  -2  268.90    4.21
   0  -2   2  278.45    4.46
   0  -2  -2  253.08    3.87
   0  -2   2  288.09    4.34
   0   2   3 3845.15   42.38
   0   2  -3 3739.04   41.12
   0   2   3 3592.22   39.42
   0  -2   3 3995.28   43.96
   0  -2  -3 3806.25   41.74
   0  -2  -3 3786.94   41.69
   0   2  -4   54.90    5.81
   0   2   4   51.63    6.00
   0   2  -4   31.44    2.56
   0   2   4   39.18    4.26
   0  -2   4   50.07    5.91
   0  -2  -4   48.43    7.23
   0  -2   4   44.02    5.70
   0  -2  -4   31.35    3.24
   0   2   5    4.46    2.70
   0   2  -5    8.31    2.47
   0   2  -5    2.22    1.91
   0   2   5    1.86    1.81
   0  -2  -5   -1.36    2.04
   0  -2   5    3.77    3.04
   0  -2   5    5.98    1.76
   0  -2  -5    5.97    2.11
   0   2  -6  893.40   17.02
   0   2   6  833.12   18.23
   0   2  -6  801.17   15.30
   0   2   6  772.39   14.69
   0  -2   6  886.48   17.24
   0  -2  -6  857.10   16.24
   0  -2   6  812.11   15.28
   0  -2  -6  808.15   15.42
   0   2   7   13.89    5.20
   0   2  -7    5.95    4.08
   0  -2   7    7.96    2.74
   0  -2  -7    4.71    3.58
   0   2  -8   40.76    7.83
   0   2   8   41.32    8.99
   0  -2   8   36.78    8.06
   0  -2  -8   40.58    9.65
   0   2   9  297.10   29.08
   0   2  -9  292.56   28.29
   0  -2  -9  342.11   65.71
   0  -2   9  314.82   60.78
   0   2  10   88.14   21.18
   0   2 -10  119.00   12.07
   0  -2 -10  116.53   16.39
   0  -2  10  103.39   14.35
   0   2  11  118.23   15.27
   0   2 -11  127.59   15.83
   0  -2 -11  123.64   19.58
   0  -2  11   81.78   29.28
   0   2 -12   32.99    9.64
   0   2  12   27.13    6.82
   0  -2  12   30.73    6.04
   0  -2 -12   34.20    9.60
   0   4  -1  298.37    3.98
   0   4  -1  340.56    4.96
   0   4   1  269.05    3.91
   0  -4  -1  291.15    4.06
   0  -4   1  324.28    4.85
   0  -4   1  319.03    4.26
   0  -4  -1  203.30    3.04
   0   4   2  142.83    8.31
   0   4  -2  140.41    8.11
   0   4   2  106.24    6.19
   0   4  -2  141.52    8.81
   0  -4   2  151.60    8.83
   0  -4  -2  140.92    8.38
   0  -4   2  152.97    9.15
   0  -4  -2  120.61    7.01
   0   4   3 1232.75   14.94
   0   4  -3 1167.26   14.00
   0   4   3 1043.92   12.61
   0   4  -3 1289.17   15.49
   0  -4   3 1292.06   15.56
   0  -4   3 1274.88   15.26
   0  -4  -3 1154.37   13.73
   0  -4  -3 1255.57   15.07
   0   4  -4  514.87    9.44
   0   4   4  522.32    9.71
   0   4  -4  572.98   10.69
   0   4   4  457.65    8.43
   0  -4  -4  527.23    9.66
   0  -4   4  537.30   10.19
   0  -4  -4  502.33    9.24
   0  -4   4  524.38    9.63
   0   4   5 1986.96   36.52
   0   4  -5 1966.89   35.88
   0   4  -5 2127.61   38.90
   0   4   5 1784.28   32.54
   0  -4  -5 2056.50   37.48
   0  -4   5 2077.31   37.97
   0  -4  -5 1978.85   36.40
   0  -4   5 1994.67   36.31
   0   4  -6  481.12   10.49
   0   4   6  485.73   10.69
   0   4  -6  443.31    9.52
   0   4   6  394.63    8.38
   0  -4   6  492.12   10.96
   0  -4  -6  459.77    9.91
   0  -4   6  456.17    9.70
   0  -4  -6  408.95    8.88
   0   4   7  403.40   21.36
   0   4  -7  457.47   52.17
   0  -4   7  438.37   50.07
   0  -4  -7  387.73   20.37
   0   4   8  362.97   42.24
   0   4  -8  389.20   46.71
   0  -4  -8  394.42   45.75
   0  -4   8  401.24   10.31
   0   4   9   72.69   13.73
   0   4  -9   77.82   17.45
   0  -4   9   64.99   12.27
   0  -4  -9   63.65    8.93
   0   4 -10    6.42    3.30
   0   4  10    4.49    2.91
   0  -4  10    4.26    2.69
   0  -4 -10    4.01    3.37
   0   4 -11  195.99   23.56
   0   4  11  185.30   21.70
   0  -4  11  153.79   28.67
   0  -4 -11  195.42   27.14
   0   4 -12   11.59    6.05
   0   4  12   16.74    6.07
   0  -4  12   23.54    6.23
   0  -4 -12   34.46    6.77
   0   6   0   14.26    1.61
   0   6   0   16.94    2.19
   0  -6   0   16.88    2.02
   0  -6   0   10.33    1.17
   0   6   1   16.65    2.65
   0   6   1    8.24    1.37
   0   6  -1   13.68    1.85
   0   6  -1   16.70    3.60
   0  -6   1   10.14    1.51
   0  -6   1   14.60    2.14
   0  -6  -1   10.05    1.17
   0   6  -2 6166.14  280.92
   0   6  -2 7276.63  331.38
   0   6   2 6660.51  303.37
   0   6   2 5635.69  256.68
   0  -6   2 6243.39  284.38
   0  -6   2 6447.58  293.71
   0  -6  -2 5638.69  256.82
   0  -6  -2 7359.30  335.15
   0   6  -3 3891.97   43.09
   0   6  -3 5239.06  238.78
   0   6   3 4400.46  200.66
   0   6   3 3763.53  171.59
   0  -6   3 5383.10  245.36
   0  -6   3 5266.81  240.08
   0  -6  -3 4339.55  197.80
   0  -6  -3 4993.97  227.64
   0   6  -4 2359.48   37.45
   0   6  -4 2124.47   33.61
   0   6   4 2129.06   34.22
   0   6   4 1743.42   27.66
   0  -6   4 2275.66   36.07
   0  -6   4 2147.71   34.03
   0  -6  -4 1810.56   29.09
   0  -6  -4 2192.13   34.71
   0   6  -5    4.55    2.29
   0   6   5    1.91    0.81
   0   6   5    0.97    2.58
   0   6  -5    4.75    2.01
   0  -6   5    0.63    1.72
   0  -6   5    3.79    1.77
   0  -6  -5    4.46    1.61
   0  -6  -5    4.03    1.77
   0   6  -6  402.35   11.41
   0   6   6  364.66   10.90
   0   6  -6  340.10    9.63
   0   6   6  280.07    8.06
   0  -6  -6  354.33   10.04
   0  -6  -6  366.19   11.51
   0  -6   6  389.97   12.47
   0   6   7  136.04   10.60
   0   6  -7  175.99   12.21
   0  -6   7  156.68   11.42
   0  -6  -7  154.83   11.72
   0   6   8 2118.92   79.12
   0   6  -8 2488.43  486.95
   0  -6   8 2368.63  463.61
   0  -6  -8 2254.72   83.88
   0   6  -9  810.28   29.68
   0   6   9  701.42   26.21
   0  -6   9  785.33   29.15
   0  -6  -9  733.70   26.69
   0   6 -10  771.07   31.92
   0   6  10  661.26   27.88
   0  -6  10  675.21   31.12
   0  -6 -10  650.62   27.02
   0   6 -11    4.96    2.91
   0   6  11   10.89    4.94
   0  -6  11    2.97    3.48
   0  -6 -11   11.08    5.20
   0   6 -12  147.98   30.37
   0   6  12  119.80   29.42
   0  -6  12  168.05   13.76
   0  -6 -12  162.74   12.91
   0   8   0   38.54    3.77
   0   8   0   44.20    4.97
   0  -8   0   40.66    5.05
   0  -8   0   33.25    3.43
   0   8   1   16.12    2.78
   0   8  -1   15.14    3.40
   0   8  -1   10.43    2.13
   0   8   1   10.15    1.54
   0  -8  -1   14.44    1.91
   0  -8   1   15.31    2.11
   0  -8   1   12.66    1.80
   0   8  -2   16.87    2.90
   0   8  -2   19.49    2.39
   0   8   2   17.74    2.68
   0  -8  -2    9.73    1.46
   0  -8   2   18.65    3.49
   0  -8   2   26.28    3.59
   0  -8  -2    6.98    1.08
   0   8  -3 3946.42   43.96
   0   8  -3 3356.61   37.30
   0   8   3 3182.69   35.65
   0   8   3 2440.18   27.34
   0  -8   3 3784.29   41.94
   0  -8   3 3602.88   40.16
   0  -8  -3 2785.02   31.10
   0  -8  -3 3369.79   37.50
   0   8  -4  133.49    8.71
   0   8  -4  164.75    8.33
   0   8   4  153.90    8.05
   0   8   4  126.39    6.41
   0  -8   4  175.54    8.95
   0  -8   4  165.44    8.89
   0  -8  -4  142.67    7.35
   0  -8  -4  171.74   12.52
   0   8  -5  183.02    9.47
   0   8  -5  149.02    7.97
   0   8   5  163.06   10.28
   0   8   5  121.42   11.16
   0  -8   5  180.99    9.55
   0  -8   5  178.43   13.57
   0  -8  -5  144.62    8.81
   0  -8  -5  150.39    7.83
   0   8  -6   60.08    8.11
   0   8   6   70.10    6.65
   0   8  -6   74.05    5.82
   0   8   6   52.63    8.07
   0  -8   6   88.17   11.06
   0  -8  -6   62.29    4.82
   0   8  -7   13.93    3.90
   0   8   7   14.24    2.99
   0  -8   7   15.57    5.58
   0  -8  -7   18.68    3.35
   0   8  -8    7.51    2.66
   0   8   8   11.50    5.19
   0  -8   8   -0.12    3.56
   0  -8  -8    6.02    2.33
   0   8  -9  673.54   33.92
   0   8   9  582.55   29.87
   0  -8   9  675.61   33.98
   0  -8  -9  614.34   30.71
   0   8 -10   14.16    6.59
   0   8  10   -2.74    4.24
   0  -8  10    7.28    4.08
   0  -8 -10    3.35    3.33
   0   8 -11   66.77   18.16
   0   8  11   59.89   14.23
   0  -8  11   68.30   17.31
   0  -8 -11   61.71   15.49
   0   8 -12   50.95   13.26
   0   8  12   64.55   17.74
   0  -8  12   53.94   21.56
   0  -8 -12   55.11   18.09
   0  10   0  266.03    4.18
   0  10   0  261.17    4.43
   0 -10   0  274.80    4.39
   0 -10   0  249.50    4.08
   0  10   1 5385.09   58.20
   0  10  -1 4445.51  202.56
   0  10  -1 4760.92  217.00
   0  10   1 3782.48   41.33
   0  10   1 5122.04   55.48
   0 -10  -1 5087.19   55.08
   0 -10   1 4993.57  227.51
   0 -10   1 4516.07  205.84
   0  10   2 1530.60   17.80
   0  10  -2 1310.11   16.26
   0  10  -2 1134.07   13.63
   0  10   2 1007.77   12.46
   0 -10  -2 1397.61   16.28
   0 -10   2 1284.95   15.33
   0 -10   2 1179.75   14.35
   0 -10  -2  756.11    9.69
   0  10  -3 2645.47   41.72
   0  10  -3 2302.01   36.08
   0  10   3 2135.11   34.51
   0 -10  -3 2339.09   36.81
   0 -10   3 2478.39   38.87
   0 -10   3 2442.72   38.45
   0 -10  -3 1788.78   28.44
   0  10  -4 2467.51   44.70
   0  10  -4 2047.07   37.05
   0  10   4 1947.35   35.62
   0  10   4 1509.87   27.57
   0 -10   4 2357.79   42.61
   0 -10   4 2191.17   39.73
   0 -10  -4 1833.06   33.30
   0 -10  -4 2006.62   36.50
   0  10   5 2193.46   37.99
   0  10  -5 2125.88   36.59
   0  10   5 1639.91   28.37
   0 -10  -5 2208.39   38.01
   0 -10   5 2449.88   42.20
   0 -10  -5 2039.71   35.30
   0 -10   5 2235.39   38.51
   0  10   6  258.50   13.63
   0  10   6  319.83   17.19
   0  10  -6  348.31   18.48
   0 -10  -6  299.64   15.85
   0 -10   6  347.63   18.42
   0  10  -7 1619.77   47.89
   0  10   7 1363.59   41.41
   0 -10   7 1536.35   45.53
   0 -10  -7 1385.83   40.81
   0  10  -8  662.61   26.35
   0  10   8  511.74   20.79
   0 -10   8  607.69   24.41
   0 -10  -8  550.82   21.86
   0  10  -9  996.96   49.79
   0  10   9  765.43   38.28
   0 -10   9  919.90   45.57
   0 -10  -9  842.23   41.56
   0  10 -10  218.54   23.33
   0  10  10  188.28   20.33
   0 -10  10  187.52   24.42
   0 -10 -10  186.60   20.00
   0  10 -11  544.18   35.50
   0  10  11  479.64   31.86
   0 -10  11  508.77   33.46
   0 -10 -11  490.30   31.81
   0  10 -12    0.56    4.42
   0  10  12    5.37    3.43
   0 -10  12    4.67    3.74
   0 -10 -12    6.64    3.32
   0  12   0 1866.57   21.66
   0  12   0 1805.70   20.63
   0 -12   0 1972.55   22.46
   0 -12   0 1750.23   20.15
   0  12   1 3293.44   36.42
   0  12  -1 2909.99   32.21
   0  12  -1 3041.73   34.16
   0 -12   1 3251.44   35.90
   0 -12  -1 3044.66   33.74
   0  12   2 1528.49   24.34
   0  12  -2 1296.95   21.68
   0  12  -2 1154.70   18.86
   0  12   2 1006.52   16.78
   0 -12  -2 1455.39   23.21
   0 -12   2 1328.27   21.47
   0 -12   2 1141.47   18.83
   0 -12  -2  742.90   12.53
   0  12  -3 1928.61   31.10
   0  12  -3 1652.49   26.43
   0  12   3 1536.88   24.95
   0 -12  -3 1672.16   26.82
   0 -12   3 1886.06   30.25
   0 -12   3 1628.48   26.31
   0 -12  -3 1204.15   20.12
   0  12  -4  963.54   18.96
   0  12  -4  770.41   15.05
   0  12   4  753.63   16.37
   0 -12  -4  805.02   15.76
   0 -12   4  917.65   17.93
   0 -12   4  810.23   15.99
   0 -12  -4  642.28   14.26
   0  12  -5 2434.00   58.29
   0  12  -5 1937.12   46.32
   0  12   5 1864.76   45.12
   0  12   5 1430.89   34.41
   0 -12  -5 2030.11   48.52
   0 -12  -5 1797.45   43.47
   0 -12   5 2200.47   53.06
   0  12   6  382.54   11.05
   0  12   6  546.09   17.58
   0  12  -6  543.72   15.26
   0 -12  -6  501.95   13.66
   0 -12   6  628.35   18.89
   0  12  -7  815.28   16.06
   0  12   7  690.39   16.46
   0 -12   7  770.82   15.18
   0 -12  -7  710.49   13.74
   0  12  -8  210.67   17.65
   0  12   8  168.91   17.61
   0 -12   8  181.22   17.75
   0 -12  -8  174.35   14.40
   0  12  -9   23.46    6.22
   0  12   9   13.55    4.49
   0 -12   9   12.72    4.80
   0 -12  -9    9.22    3.12
   0  12 -10  159.10   23.49
   0  12  10  145.23   22.30
   0 -12  10  140.72   25.12
   0 -12 -10  123.75   20.22
   0  12 -11  224.93   35.25
   0  12  11  161.84   30.69
   0 -12  11  233.92    9.94
   0 -12 -11  213.29   10.46
   0  14   0 2193.62   34.58
   0  14   0 2108.43   32.92
   0 -14   0 2287.00   35.94
   0 -14   0 2060.85   32.44
   0  14   1  260.70   12.56
   0  14   1  275.69   13.43
   0  14  -1  245.42   11.70
   0  14  -1  248.86   13.01
   0 -14   1  260.96   12.47
   0 -14  -1  268.38   12.88
   0 -14  -1  226.13   10.97
   0 -14   1  213.40   10.36
   0  14   2  180.57    9.88
   0  14  -2  153.06    9.78
   0  14  -2  138.08    7.39
   0  14   2  125.82    6.74
   0 -14  -2  174.02   10.50
   0 -14   2  152.63    7.80
   0 -14   2  144.53   13.32
   0  14   3  134.12    9.03
   0  14  -3  119.81    9.16
   0  14  -3   91.33    5.64
   0  14   3   83.47    7.75
   0 -14  -3  123.38   10.62
   0 -14   3  114.31    9.18
   0 -14   3  104.49    9.98
   0 -14  -3   67.74    4.23
   0  14  -4   19.77    2.83
   0  14  -4   14.97    2.64
   0  14   4   18.69    2.80
   0 -14  -4   18.07    2.43
   0 -14   4   19.32    2.96
   0 -14   4   14.15    1.61
   0 -14  -4    6.37    1.72
   0  14  -5  158.01   12.24
   0  14  -5  142.75   13.78
   0  14   5  139.49    9.09
   0 -14  -5  124.60   11.20
   0 -14   5  159.56   10.67
   0 -14  -5  117.80    9.25
   0  14   6  645.86   19.65
   0  14   6  881.07   26.88
   0  14  -6 1089.41   34.36
   0 -14  -6  860.82   25.86
   0 -14   6 1052.08   31.71
   0  14  -7    9.63    4.24
   0  14   7   13.57    5.01
   0 -14   7    7.53    2.28
   0 -14  -7    3.51    2.18
   0  14  -8   93.75   21.53
   0  14   8   76.19   20.69
   0 -14   8   81.41   15.30
   0 -14  -8   84.44   13.41
   0  14  -9    5.80    2.19
   0  14   9   12.62    4.88
   0 -14   9    3.40    2.66
   0 -14  -9    6.36    3.05
   0  14 -10   12.02    5.00
   0  14  10   10.08    4.42
   0 -14  10    9.91    4.02
   0 -14 -10    3.68    1.97
   0  14 -11  146.27   28.86
   0  14  11   86.44   25.39
   0 -14  11   71.37   29.94
   0 -14 -11  111.09   24.23
   0  16   0 5783.58  264.87
   0  16   0 5521.72   84.52
   0 -16   0 6212.62   95.02
   0 -16   0 5303.28  242.88
   0  16   1  682.71   13.89
   0  16   1  703.79   13.52
   0  16  -1  687.28   13.23
   0  16  -1  687.26   13.70
   0 -16   1  699.73   13.62
   0 -16  -1  734.97   14.40
   0 -16  -1  673.95   13.20
   0 -16   1  650.83   12.85
   0  16   2 2109.80   38.01
   0  16  -2 1856.39   34.13
   0  16  -2 1665.44   30.27
   0  16   2 1419.51   26.26
   0 -16  -2 1947.89   35.17
   0 -16   2 1974.27   35.81
   0 -16   2 1534.55   28.34
   0  16   3 4337.51   72.35
   0  16  -3 3843.77   64.97
   0  16  -3 3047.42   51.29
   0  16   3 2865.87   48.79
   0 -16  -3 4153.11   69.25
   0 -16   3 3804.13   63.84
   0 -16   3 3170.90   53.67
   0 -16  -3 2193.11   37.43
   0  16   4 2485.60   58.93
   0  16   4 1497.83   37.27
   0  16  -4 1681.47   40.31
   0  16  -4 2120.89   51.56
   0 -16   4 2116.58   50.61
   0 -16  -4 1311.93   31.75
   0  16  -5  818.37   21.65
   0  16  -5  616.03   16.07
   0  16   5  611.76   17.86
   0 -16  -5  669.55   17.56
   0 -16   5  792.70   20.78
   0 -16  -5  546.13   14.47
   0  16  -6 2868.44   46.54
   0  16   6 2182.18   36.03
   0 -16   6 2723.17   44.02
   0 -16  -6 2026.33   32.96
   0  16  -7  862.08   33.94
   0  16   7  639.72   25.53
   0 -16   7  817.56   31.96
   0 -16  -7  661.62   25.98
   0  16  -8  275.84   23.95
   0  16   8  186.93   20.55
   0 -16   8  245.19   16.65
   0 -16  -8  191.00   13.04
   0  16  -9  999.64   42.12
   0  16   9  742.88   30.82
   0 -16   9  981.87   39.95
   0 -16  -9  791.58   32.00
   0  16 -10  672.88   36.20
   0  16  10  587.18   31.87
   0 -16  10  665.00   35.68
   0 -16 -10  582.57   31.03
   0  16 -11   53.37   21.24
   0  16  11   74.60   14.49
   0 -16  11   53.69   19.06
   0 -16 -11   56.19   17.96
   0  18   0  386.63    8.98
   0  18   0  365.93    7.77
   0 -18   0  397.52    9.13
   0 -18   0  364.50    7.81
   0  18   1   -1.77    1.41
   0  18   1    1.84    1.78
   0  18  -1    3.08    1.46
   0  18  -1    2.57    3.19
   0 -18   1    3.29    2.17
   0 -18  -1    2.77    1.46
   0 -18  -1    4.40    1.87
   0 -18   1    3.36    1.71
   0  18  -2   94.88    8.15
   0  18   2  100.04    7.32
   0  18  -2   87.41    8.21
   0  18   2   67.85    7.79
   0 -18   2   90.43    9.06
   0 -18  -2   71.77    4.09
   0 -18   2   55.22    4.88
   0  18   3 2974.22   70.18
   0  18  -3 2669.65   63.58
   0  18  -3 2175.86   51.66
   0  18   3 1779.81   43.01
   0 -18  -3 2737.65   64.58
   0 -18   3 2720.31   64.46
   0 -18   3 2048.49   48.99
   0 -18  -3 1545.38   37.21
   0  18   4    1.44    1.04
   0  18  -4    3.89    1.56
   0  18  -4    1.62    1.33
   0  18   4    1.08    2.71
   0 -18  -4    1.12    1.13
   0 -18   4    5.48    4.07
   0 -18  -4    1.53    1.27
   0  18  -5   57.06   10.22
   0  18   5   31.50    4.83
   0 -18   5   34.28    5.53
   0 -18  -5   36.82    5.65
   0  18  -6   52.36   13.16
   0  18   6   44.88    7.02
   0 -18   6   64.17   11.33
   0 -18  -6   40.14    6.40
   0  18  -7  118.07   18.65
   0  18   7   66.49   11.23
   0 -18   7   79.38   12.87
   0 -18  -7   60.32    9.51
   0  18  -8   23.00    4.40
   0  18   8   23.51    3.91
   0 -18   8   26.59    5.54
   0 -18  -8   10.10    2.97
   0  18  -9  195.00   21.17
   0  18   9  118.93   24.26
   0 -18   9  221.67   23.60
   0 -18  -9  157.80   18.69
   0  18 -10   -3.58    4.37
   0  18  10    6.11    4.14
   0 -18  10    9.28    5.18
   0 -18 -10    2.32    1.66
   0  18 -11   13.58    4.62
   0  18  11   15.86    4.97
   0 -18  11   18.41    7.06
   0 -18 -11    6.18    2.86
   0  20   0  446.64   14.75
   0  20   0  396.19   10.45
   0 -20   0  439.64   11.66
   0 -20   0  357.48    9.92
   0  20  -1   15.49    2.02
   0  20  -1   15.17    3.38
   0  20   1   11.26    2.07
   0 -20  -1   16.91    2.62
   0 -20  -1   16.30    2.09
   0 -20   1   16.57    2.35
   0 -20   1   15.90    2.50
   0  20   2 1112.84   27.02
   0  20  -2  975.46   24.64
   0  20  -2  901.46   22.12
   0  20   2  656.13   16.72
   0 -20  -2  943.07   23.20
   0 -20   2 1089.10   26.69
   0 -20   2  878.00   22.70
   0  20   3  299.21   18.02
   0  20  -3  280.96   18.41
   0  20  -3  216.82   14.03
   0  20   3  189.00   15.64
   0 -20  -3  264.82   16.53
   0 -20   3  280.58   15.02
   0 -20  -3  162.41   12.05
   0  20   4  779.69   23.72
   0  20  -4  750.66   23.38
   0  20  -4  562.49   17.23
   0  20   4  489.68   15.54
   0 -20  -4  763.97   22.86
   0 -20   4  731.53   22.35
   0 -20  -4  447.73   14.11
   0  20   5   21.58    5.15
   0  20  -5   35.37    6.62
   0 -20   5   19.22    4.36
   0 -20  -5   16.87    3.44
   0 -20  -5   20.58    4.49
   0  20  -6   78.83   17.88
   0  20   6   61.30   11.05
   0 -20   6   86.82   14.93
   0 -20  -6   50.70    9.24
   0  20  -7   11.69    4.57
   0  20   7   12.85    4.84
   0 -20   7   22.62    5.24
   0 -20  -7   15.98    3.60
   0  20  -8  538.18   26.25
   0  20   8  356.41   16.00
   0 -20   8  498.62   21.29
   0 -20  -8  389.21   16.70
   0  20  -9  110.82   18.24
   0  20   9   89.32   11.84
   0 -20   9  106.14   14.89
   0 -20  -9   56.60   14.11
   0  20 -10   64.17   23.95
   0  20  10   49.57   15.81
   0 -20  10  117.12   18.50
   0 -20 -10   47.83   16.90
   0  22   0 2487.37   60.17
   0  22   0 2370.94   57.04
   0 -22   0 2759.48   66.89
   0 -22   0 2351.71   56.85
   0  22   1 1092.11   27.15
   0  22   1 1302.02   32.27
   0  22   1 1371.08   34.89
   0  22  -1 1174.96   29.12
   0  22  -1 1373.84   34.75
   0 -22  -1 1576.85   38.51
   0 -22   1 1501.25   36.79
   0 -22  -1 1331.50   32.76
   0 -22   1 1213.34   30.16
   0  22  -2 1993.51   48.35
   0  22   2 2126.70   51.39
   0  22   2 1530.92   37.52
   0  22  -2 1983.87   48.71
   0 -22   2 2096.41   50.90
   0 -22  -2 1977.25   48.13
   0  22   3  162.18   14.80
   0  22  -3  157.27   13.75
   0  22  -3  106.74   11.67
   0  22   3   83.39    6.38
   0 -22  -3  149.53   11.65
   0 -22   3  167.10   15.95
   0 -22  -3   96.21    7.16
   0  22   4  663.89   14.26
   0 -22  -4  619.19   14.11
   0  22   5  511.51   25.53
   0  22  -5  746.20   30.97
   0 -22   5  774.77   30.27
   0 -22  -5  755.99   28.71
   0 -22  -5  461.75   18.41
   0  22  -6 1456.38   51.68
   0  22   6  905.93   32.49
   0 -22   6 1452.58   50.91
   0 -22  -6  972.73   34.50
   0  22  -7  525.10   24.39
   0  22   7  337.70   18.31
   0 -22   7  541.70   23.45
   0 -22  -7  391.38   17.05
   0  22  -8 1140.39   53.35
   0  22   8  790.30   37.37
   0 -22   8 1123.58   52.17
   0 -22  -8  849.01   39.54
   0  22  -9   47.74   12.65
   0  22   9   16.33    6.75
   0 -22   9   30.10   10.24
   0 -22  -9   35.56    6.91
   0  22 -10  410.94   30.38
   0  22  10  250.15   19.89
   0 -22  10  370.51   26.68
   0 -22 -10  265.79   19.38
   0  24   0  943.24   28.28
   0  24   0  832.33   24.88
   0 -24   0 1013.08   29.94
   0 -24   0  818.28   24.57
   0  24   1   19.66    3.64
   0  24   1   12.65    2.29
   0  24  -1   14.44    2.33
   0  24   1   13.72    2.67
   0  24  -1   24.68    4.25
   0 -24   1   -1.35    2.08
   0 -24  -1    7.53    2.61
   0  24  -2   90.32    9.73
   0  24   2   84.10    9.52
   0  24   2   94.45   10.14
   0  24  -2   95.10    8.08
   0 -24   2  111.22   10.79
   0 -24  -2   87.78    7.08
   0  24  -3  148.75   14.28
   0  24   3  163.76   15.26
   0  24   3  128.25   12.97
   0  24  -3  204.90   19.96
   0 -24   3  187.09   16.96
   0 -24  -3  162.71   15.55
   0 -24  -3  113.57   13.46
   0  24   4   23.20    4.00
   0  24  -4   34.11    5.76
   0 -24   4   33.92    7.64
   0 -24  -4   31.70    4.41
   0 -24  -4   19.07    4.64
   0  24  -5   23.96    6.11
   0  24   5   15.02    4.56
   0 -24   5   15.40    5.03
   0 -24  -5    6.99    2.88
   0  24  -6  280.52   19.00
   0  24   6  164.05   11.67
   0 -24   6  275.06   18.42
   0 -24  -6  146.51   21.80
   0  24  -7   10.60    3.69
   0  24   7    3.82    4.10
   0 -24   7   23.20    6.06
   0 -24  -7    6.65    3.26
   0  24  -8   13.38    3.25
   0  24   8   10.08    3.27
   0 -24   8   22.08    6.21
   0 -24  -8   13.21    4.46
   0  24  -9   40.79    9.42
   0  24   9   22.03    7.39
   0 -24   9   17.78    9.05
   0 -24  -9   26.08    6.15
   0  26   0  458.92   10.86
   0  26   0  395.22    8.16
   0 -26   0  479.06   55.23
   0  26  -1 1981.85   73.85
   0  26  -1 1695.05   63.01
   0  26   1 1871.92   69.43
   0  26   1 1493.10   55.70
   0  26   1 1924.07   71.56
   0 -26   1 2065.99   76.64
   0  26  -2  119.36   13.87
   0  26   2   73.77   10.40
   0  26  -2   61.60    9.85
   0  26   2   91.22   11.42
   0 -26   2  105.45   12.41
   0  26   3  284.46   22.66
   0  26  -3  305.00   24.05
   0  26  -3  381.02   86.20
   0 -26   3  405.50   88.80
   0 -26  -3  211.67   19.96
   0  26  -4  370.41   16.19
   0  26   4  218.81   23.95
   0 -26   4  390.60   15.23
   0 -26  -4  202.40   38.98
   0  26  -5  969.34   47.86
   0  26   5  606.48   30.84
   0 -26   5 1113.09   54.53
   0 -26  -5  640.27   31.71
   0  26  -6  291.68   23.18
   0  26   6  170.90   15.24
   0 -26   6  294.39   49.09
   0 -26  -6  175.78   18.18
   0  26  -7  504.77   26.33
   0  26   7  288.06   22.22
   0 -26   7  489.93   26.61
   0 -26  -7  370.71   18.15
   0  26  -8    2.84    4.79
   0  26   8    7.40    3.31
   0 -26   8    1.75    2.80
   0 -26  -8    9.55    3.53
   0  26  -9   35.93   13.63
   0  26   9   42.65    9.96
   0 -26   9   51.59   13.64
   0 -26  -9   39.27   10.09
   0  28   0  345.73   28.79
   0  28   0  301.66   23.78
   0 -28   0  369.00   29.31
   0  28  -1   35.16    9.26
   0  28   1   21.62    5.30
   0  28  -1   11.41    2.89
   0  28   1   21.57    5.25
   0 -28   1   13.74    4.59
   0  28   2  748.89   28.78
   0  28  -2  828.18   31.52
   0  28  -2 1060.70   40.81
   0 -28   2 1104.88   41.92
   0  28  -3  262.00   25.60
   0  28   3  201.73   27.04
   0 -28   3  266.03   25.67
   0 -28  -3  134.24   17.78
   0  28  -4  640.13   32.56
   0  28   4  511.64   27.17
   0 -28   4  732.19   36.18
   0 -28  -4  402.98   21.82
   0  28  -5   29.44    4.70
   0  28   5   21.26    3.25
   0 -28   5   24.51    6.59
   0 -28  -5   11.60    3.63
   0  28  -6  190.96   30.22
   0  28   6  167.96   18.14
   0 -28   6  229.61   27.12
   0 -28  -6  127.87   17.86
   0  28  -7    4.17    4.14
   0  28   7    2.14    2.81
   0 -28   7   -0.76    2.94
   0 -28  -7    2.34    1.92
   0  28  -8  723.62   60.14
   0  28   8  391.73   33.15
   0 -28   8  769.72   63.85
   0 -28  -8  513.43   42.65
   0  30   0  593.65   30.89
   0 -30   0  639.14   32.22
   0  30  -1  107.22   16.45
   0  30   1   79.48    7.46
   0 -30   1  105.31   13.88
   0  30  -2  246.66   19.16
   0  30   2  174.87   16.17
   0 -30   2  251.74   21.81
   0  30  -3  159.06   14.67
   0  30   3   89.01   13.49
   0 -30   3  100.82   18.00
   0 -30  -3   72.75    9.84
   0  30  -4  126.10   13.85
   0  30   4  105.84   18.07
   0 -30   4  138.44   16.67
   0 -30  -4   63.24   11.84
   0  30  -5    7.65    4.21
   0  30   5    4.55    2.36
   0 -30   5    8.89    2.90
   0 -30  -5    5.76    2.23
   0  30  -6  258.53   29.66
   0  30   6  201.29   23.14
   0 -30   6  276.62   31.85
   0 -30  -6   96.53   21.42
   0  30  -7   55.86   12.07
   0  30   7   21.94    9.17
   0 -30   7   28.06   10.54
   0 -30  -7   31.94    7.16
   0  30  -8   64.30   10.23
   0  30   8   34.49    9.15
   0 -30   8   51.61   15.09
   0  32   0    5.72    2.23
   0 -32   0    5.64    3.02
   0  32  -1  606.79   26.50
   0  32   1  441.25   23.30
   0 -32   1  674.69   27.87
   0  32  -2   29.59    6.74
   0  32   2   15.28    4.47
   0 -32   2   15.50    4.84
   0  32  -3 2388.91  442.99
   0  32   3 1867.48  346.29
   0 -32   3 2496.95  462.93
   0 -32  -3 1212.06  224.88
   0  32  -4  127.98   15.17
   0  32   4  105.47    5.01
   0 -32   4  100.91   12.66
   0 -32  -4   48.01   10.68
   0  32  -5  151.40   25.91
   0  32   5  101.77   21.09
   0 -32   5  142.95   26.66
   0 -32  -5   83.05   16.98
   0  32  -6   -3.04    3.58
   0  32   6    1.77    2.73
   0 -32   6   -0.20    2.76
   0 -32  -6    1.87    2.18
   0  32  -7  358.64   25.81
   0  32   7  165.73   24.31
   0 -32   7  352.79   25.18
   0  34   0  656.81   32.00
   0  34   0  912.28   43.15
   0  34  -1   26.01    5.10
   0  34   1   17.70    3.63
   0 -34   1   27.48    6.47
   0  34  -2    3.44    2.67
   0  34   2    9.90    3.61
   0 -34   2    5.26    1.60
   0  34  -3   11.46    4.42
   0  34   3   10.75    3.93
   0 -34   3    9.56    4.92
   0 -34  -3    6.01    2.92
   0  34  -4    4.59    4.09
   0  34   4    8.84    4.45
   0 -34   4    2.52    2.64
   0 -34  -4    3.30    2.51
   0  34  -5    9.61    3.99
   0  34   5    2.67    2.07
   0 -34   5    0.66    2.51
   0 -34  -5    1.91    2.62
   0  34  -6  281.69   33.49
   0  34   6  236.70   22.09
   0 -34   6  283.96   27.69
   0  36   0   -1.87    1.93
   0  36   0    0.96    1.12
   0  36  -1  136.77   25.20
   0 -36   1   63.11   18.97
   0  36  -2  146.31   27.74
   0 -36   2   84.65   20.81
   0  36  -3   28.69    6.00
   0 -36   3   14.86    4.84
   0 -36  -3   13.38    4.02
   0  36  -4   66.49   15.62
   0 -36   4   71.93   14.31
   0 -36  -4   37.44    9.92
   0  36  -5  201.06   20.62
   0  38  -1  729.82   60.33
   0  38  -2   42.07    7.36
   0  38  -3  256.68   26.42
   0 -38  -3   74.87   22.67
   1   1 -12   12.20    4.14
  -1   1  12    3.32    3.15
  -1  -1  12    8.32    3.34
   1  -1 -12    8.76    4.17
  -1   1  11   66.20   21.00
   1   1 -11   74.67   20.59
  -1  -1  11   76.66   18.63
   1  -1 -11   84.14   14.28
  -1   1  10    3.35    3.78
   1   1 -10   12.57    4.68
  -1  -1  10    7.98    3.41
   1  -1 -10    1.03    3.39
  -1   1   9   95.57   16.92
   1   1  -9   84.38   10.10
  -1  -1   9  102.10   17.19
   1  -1  -9   87.83   18.79
  -1   1   8  323.68   24.52
   1   1  -8  323.14   24.25
  -1  -1   8  318.57   24.65
   1  -1  -8  317.23   25.66
  -1   1   7   11.63    2.65
   1   1  -7   13.69    2.83
  -1  -1   7   14.08    3.05
   1  -1  -7   15.54    3.70
  -1   1   6  345.47    8.44
   1   1  -6  319.61   14.54
   1   1  -6  230.04   10.68
  -1   1   6  259.16   11.86
   1  -1  -6  294.40   13.73
   1  -1  -6  303.07   15.69
  -1  -1   6  281.12   12.72
  -1  -1   6  284.71   15.26
  -1   1   5 1086.05   18.64
  -1   1   5 1031.89   17.45
   1   1  -5 1204.58   21.97
   1  -1  -5 1049.98   17.84
  -1  -1   5 1070.28   18.01
  -1  -1   5 1163.75   20.44
   1  -1  -5 1138.92   19.27
   1   1  -4   96.62    6.06
  -1   1   4   96.00    8.51
  -1   1   4   96.57    6.46
   1   1  -4   84.18    5.44
  -1  -1   4   87.98    6.27
   1  -1  -4   90.13    6.09
  -1  -1   4   83.13    5.23
   1  -1  -4   89.82    5.96
   1   1  -3   21.42    3.63
  -1   1   3   18.67    3.49
  -1   1   3   19.68    3.71
   1   1  -3   19.89    3.81
  -1  -1   3   20.75    3.80
   1  -1  -3   19.66    4.54
  -1  -1   3   19.92    3.29
   1  -1  -3   23.68    4.22
  -1   1   2  713.28    8.75
   1   1  -2  729.87    9.09
   1   1  -2  673.25    8.51
  -1   1   2  628.37    7.84
  -1  -1   2  685.99    8.44
   1  -1  -2  656.77    8.24
  -1  -1   2  772.09    9.46
   1  -1  -2  691.05    9.00
  -1   1  -2    7.30    1.39
   1   1   2    9.02    1.82
  -1   1  -2    8.42    1.53
   1   1   2    7.07    1.23
   1  -1   2   11.08    2.13
   1  -1   2   11.07    2.00
  -1  -1  -2    8.91    1.90
  -1  -1  -2    7.92    1.26
  -1   1  -3   45.05    4.50
   1   1   3   53.52    7.33
  -1   1  -3   44.17    4.29
   1   1   3   39.32    2.79
   1  -1   3   50.35    6.35
  -1  -1  -3   37.59    3.09
  -1  -1  -3   47.28    3.76
   1  -1   3   42.93    2.98
  -1   1  -4  368.86   17.44
   1   1   4  370.23   18.00
  -1   1  -4  368.21   17.49
   1   1   4  339.32   16.02
  -1  -1  -4  353.13   16.73
  -1  -1  -4  375.48   17.72
   1  -1   4  346.83   17.66
   1  -1   4  346.46   16.37
   1   1   5  166.31   10.59
  -1   1  -5  149.53    7.68
  -1   1  -5  170.04    9.59
   1   1   5  144.06    8.34
   1  -1   5  158.57    8.39
  -1  -1  -5  164.21    8.44
  -1  -1  -5  183.28    9.39
   1  -1   5  162.19   12.85
   1   1   6  223.61   10.96
  -1   1  -6  207.41    9.69
  -1   1  -6  243.94   11.35
   1   1   6  214.56    9.96
   1  -1   6  225.40   11.29
  -1  -1  -6  220.61   10.30
  -1  -1  -6  221.27   10.52
   1  -1   6  218.68   11.51
  -1   1  -7   71.42   10.23
   1   1   7   75.85    5.90
   1  -1   7   87.34   11.16
  -1  -1  -7   76.58    7.46
   1   1   8    5.67    3.52
  -1   1  -8   13.47    3.38
  -1  -1  -8    4.00    2.55
   1   1   9   80.94   15.76
  -1   1  -9   73.53   16.18
  -1  -1  -9   69.66   13.92
   1  -1   9   77.61   15.55
   1   1  10   46.13   10.25
  -1   1 -10   52.86   11.13
   1  -1  10   39.99    9.03
  -1  -1 -10   55.48    6.59
   1   1  11   21.34    6.82
  -1   1 -11   41.76    8.15
   1  -1  11   29.37    7.06
  -1  -1 -11   25.04   10.46
   1   1  12   74.31   19.95
  -1   1 -12   46.97   19.84
   1  -1  12   59.48   19.98
  -1  -1 -12   64.10   18.63
   1   3 -12  128.96   30.78
  -1   3  12   60.79   27.80
  -1  -3  12  104.92   31.35
   1  -3 -12  105.61   22.50
   1   3 -11  118.03   15.22
  -1   3  11  124.48   16.08
  -1  -3  11  114.50   14.16
   1  -3 -11  116.65   16.32
   1   3 -10  527.31   23.10
  -1   3  10  479.66   22.65
  -1  -3  10  522.19   23.14
   1  -3 -10  523.91   22.94
   1   3  -9   20.04    6.02
  -1   3   9   21.06    6.39
  -1  -3   9   19.72    6.62
   1  -3  -9   17.20    5.03
  -1   3   8  975.68   18.78
   1   3  -8 1039.67   19.36
   1  -3  -8  996.81   18.41
  -1  -3   8 1024.13   24.68
  -1   3   7   61.96   11.75
   1   3  -7   61.50    9.54
  -1  -3   7   60.60    9.27
   1  -3  -7   63.99   10.76
   1   3  -6  767.22   15.08
  -1   3   6  692.90   13.99
   1   3  -6  676.17   13.25
  -1   3   6  655.66   12.85
  -1  -3   6  738.81   15.88
   1  -3  -6  708.20   14.00
  -1  -3   6  676.42   13.66
   1  -3  -6  670.01   13.17
   1   3  -5  173.48    8.87
  -1   3   5  164.12    8.33
  -1   3   5  179.73    9.42
   1   3  -5  182.61    9.37
  -1  -3   5  192.92   11.19
   1  -3  -5  182.78    9.41
  -1  -3   5  165.80    8.38
   1  -3  -5  167.21   10.22
  -1   3   4  829.81   14.23
  -1   3   4  728.77   12.51
   1   3  -4  842.21   14.37
   1   3  -4  920.68   15.72
  -1  -3   4  917.42   15.75
  -1  -3   4  820.53   13.98
   1  -3  -4  783.68   13.45
   1  -3  -4  859.36   14.52
   1   3  -3  146.49    8.94
  -1   3   3  183.51    5.58
   1   3  -3  164.91    9.63
  -1   3   3  143.75    7.17
  -1  -3   3  197.65    4.50
   1  -3  -3  166.38    8.28
  -1  -3   3  175.79    5.05
   1  -3  -3  178.96    3.58
   1   3  -2 2193.91   24.62
   1   3  -2 2221.73   24.82
  -1   3   2 2057.48   22.85
  -1   3   2 1673.45   18.90
  -1  -3   2 2370.16   26.37
   1  -3  -2 1768.79   19.94
  -1  -3   2 2108.21   23.51
   1   3  -1  251.73    3.82
   1   3  -1  264.58    3.84
  -1   3   1  250.45    3.50
  -1   3   1  167.77    2.85
  -1  -3   1  277.29    4.01
  -1  -3   1  256.35    3.55
   1  -3  -1  166.29    2.82
   1  -3  -1  228.07    3.02
  -1   3  -1   39.06    2.59
  -1   3  -1   37.21    2.31
   1   3   1   31.31    2.23
   1   3   1   25.61    1.60
   1  -3   1   38.68    2.83
   1  -3   1   36.77    2.41
  -1  -3  -1   30.24    1.84
  -1  -3  -1   32.79    2.34
  -1   3  -2 3590.14   39.08
   1   3   2 4076.61   44.52
   1   3   2 4213.55   45.39
   1  -3   2 3971.47   43.24
  -1  -3  -2 4494.94  204.83
  -1  -3  -2 4343.88  197.84
  -1   3  -3 2054.66   23.50
  -1   3  -3 1725.06   19.86
   1   3   3 1683.31   19.67
   1   3   3 1690.71   19.22
   1  -3   3 1888.52   21.74
   1  -3   3 1867.53   21.48
  -1  -3  -3 1845.44   20.88
  -1  -3  -3 1759.96   20.43
   1   3   4 1696.04   29.01
  -1   3  -4 1828.46   29.13
   1   3   4 1697.07   26.88
  -1   3  -4 1980.91   31.50
   1  -3   4 1830.93   29.38
   1  -3   4 1852.24   29.73
  -1  -3  -4 1857.31   29.40
  -1   3  -5  548.50   11.58
   1   3   5  470.73   11.80
  -1   3  -5  448.85    9.68
   1   3   5  465.01    9.70
   1  -3   5  492.73   10.77
  -1  -3  -5  491.76   10.32
   1  -3   5  485.55   10.23
  -1   3  -6  412.65   11.50
   1   3   6  373.93   10.81
  -1   3  -6  328.35    9.32
   1   3   6  345.59    9.57
   1  -3   6  405.45   15.29
  -1  -3  -6  390.90   12.39
   1  -3   6  343.44    9.58
  -1  -3  -6  296.38    9.82
   1   3   7   13.32    2.53
   1   3   7   15.07    3.37
  -1   3  -7   19.77    3.91
  -1  -3  -7   22.01    3.95
   1  -3   7   25.73    5.12
   1   3   8  788.87   30.71
  -1   3  -8  942.39   36.22
   1  -3   8  857.17   33.30
  -1  -3  -8  860.34   33.00
   1   3   9  166.24   21.78
  -1   3  -9  177.12   23.92
   1  -3   9  155.95   21.48
  -1  -3  -9  149.07   19.47
   1   3  10  473.67   20.61
  -1   3 -10  553.54   23.62
   1  -3  10  504.83   21.93
  -1  -3 -10  500.41   21.96
  -1   3 -11   49.46   16.85
   1   3  11   60.12   12.31
   1  -3  11   58.78   16.19
  -1  -3 -11   66.18   12.90
  -1   3 -12   48.74   15.89
   1   3  12   39.02    8.49
   1  -3  12   35.75   10.25
  -1  -3 -12   36.33   11.22
   1   5 -12    6.63    4.94
  -1   5  12   10.07    5.65
  -1  -5  12   10.35    4.50
   1  -5 -12    7.99    4.45
   1   5 -11   16.30    4.43
  -1   5  11   18.77    4.66
  -1  -5  11   16.25    6.41
   1  -5 -11   20.90    7.11
   1   5 -10   69.42    9.42
  -1   5  10   43.94   10.40
  -1  -5  10   54.30   10.04
   1  -5 -10   60.23   11.60
  -1   5   9   48.57    8.89
   1   5  -9   60.73    8.04
  -1  -5   9   27.45    5.29
   1  -5  -9   41.38    5.74
   1   5  -8  468.87   11.12
  -1   5   8  408.49   10.18
  -1  -5   8  490.52   11.37
   1  -5  -8  446.44   10.33
   1   5  -7   27.02    5.28
  -1   5   7   11.96    4.13
  -1  -5   7   20.31    3.80
   1  -5  -7   12.88    2.69
   1   5  -6  102.47   11.94
  -1   5   6   85.41    6.33
   1   5  -6   86.40    6.35
  -1   5   6   74.90    5.08
  -1  -5   6  108.55    8.05
  -1  -5   6   80.22    7.82
   1  -5  -6   98.35    7.76
   1  -5  -6   91.20    8.93
   1   5  -5    4.10    3.05
  -1   5   5    3.75    1.56
   1   5  -5    6.06    2.73
  -1   5   5    3.34    1.68
  -1  -5   5    9.30    2.47
   1  -5  -5    0.98    1.16
  -1  -5   5    2.59    1.74
   1  -5  -5    2.93    1.82
   1   5  -4   -0.41    2.45
   1   5  -4    1.57    1.17
  -1   5   4    7.61    2.38
  -1   5   4    1.60    1.40
  -1  -5   4    3.57    2.17
   1  -5  -4    2.06    1.30
  -1  -5   4    1.28    1.59
   1  -5  -4    1.61    1.36
   1   5  -3   35.64    4.58
   1   5  -3   31.65    2.61
  -1   5   3   35.92    3.91
  -1   5   3   19.91    3.04
  -1  -5   3   29.71    2.95
  -1  -5   3   36.23    5.21
   1  -5  -3   19.52    2.20
   1  -5  -3   42.51    5.90
   1   5  -2   59.89    4.04
  -1   5   2   40.16    3.54
  -1   5   2   51.78    3.33
   1   5  -2   64.92    6.12
  -1  -5   2   61.50    4.46
  -1  -5   2   52.78    3.47
   1  -5  -2   38.08    2.84
   1  -5  -2   58.13    4.72
   1   5  -1   79.17    5.05
  -1   5   1   62.60    4.68
   1   5  -1   81.61    4.88
  -1  -5   1   82.34    5.99
   1  -5  -1   71.47    4.34
  -1  -5   1   74.37    4.73
   1   5   0   90.03    5.21
  -1   5   0   71.64    4.35
   1   5   0   66.35    4.08
  -1  -5   0   61.39    3.90
   1  -5   0   60.97    3.52
   1  -5   0   67.83    4.14
  -1  -5   0   90.03    5.29
   1   5   1  258.90    3.94
   1   5   1  181.34    3.30
  -1   5  -1  196.53    2.85
  -1   5  -1  169.79    8.15
   1  -5   1  207.92    3.09
   1  -5   1  202.77    4.11
  -1  -5  -1  141.49    2.26
  -1   5  -2 1658.12   19.13
  -1   5  -2 1413.89   16.09
   1   5   2 1373.56   16.20
   1   5   2 1134.55   12.86
  -1  -5  -2 1428.87   16.62
   1  -5   2 1525.59   17.71
  -1  -5  -2 1321.17   15.07
   1  -5   2 1604.65   18.43
  -1   5  -3   33.18    5.88
  -1   5  -3   22.26    2.46
   1   5   3   31.14    4.57
   1   5   3   28.13    4.47
   1  -5   3   24.15    3.65
   1  -5   3   31.59    5.20
  -1  -5  -3   29.83    4.93
  -1  -5  -3   31.38    5.53
  -1   5  -4   39.02    3.57
   1   5   4   41.00    8.04
  -1   5  -4   29.13    2.42
   1   5   4   31.72    2.77
   1  -5   4   38.56    3.02
   1  -5   4   41.95    5.83
  -1  -5  -4   38.03    3.56
  -1  -5  -4   37.39    3.20
  -1   5  -5    3.88    2.72
  -1   5  -5   14.58    2.39
   1   5   5   13.51    2.90
   1   5   5   10.29    1.65
   1  -5   5   11.67    2.90
   1  -5   5    7.86    1.60
  -1  -5  -5    9.75    2.15
  -1  -5  -5    7.34    3.06
  -1   5  -6  267.72    7.91
   1   5   6  280.02   10.13
   1   5   6  229.91   16.72
  -1   5  -6  325.32    9.67
   1  -5   6  284.14    8.97
   1  -5   6  253.38   18.21
  -1  -5  -6  291.15    8.48
   1   5   7   34.51    7.13
   1   5   7   63.98    7.65
  -1   5  -7   61.57   11.87
  -1  -5  -7   63.73   10.06
   1  -5   7   61.67    8.15
  -1   5  -8   27.21    4.91
   1   5   8   27.38    4.94
   1  -5   8   15.39    4.89
  -1  -5  -8   13.19    3.29
  -1   5  -9   10.31    4.35
   1   5   9    3.52    5.57
   1  -5   9    7.24    2.66
  -1  -5  -9   -2.63    3.16
   1   5  10   24.51    6.95
  -1   5 -10    3.38    3.96
   1  -5  10    1.81    2.72
  -1  -5 -10   -1.52    3.19
  -1   5 -11   13.90    3.97
   1   5  11   12.57    6.07
   1  -5  11    2.58    4.57
  -1  -5 -11   19.79    6.42
  -1   5 -12   65.60   16.95
   1   5  12   45.20   20.71
   1  -5  12   49.72   21.68
  -1  -5 -12   69.53   19.79
   1   7 -12   25.21    7.08
  -1   7  12   39.43    6.29
  -1  -7  12   33.28    7.13
   1  -7 -12   36.65    5.22
   1   7 -11  118.29   20.49
  -1   7  11   78.09   20.20
  -1  -7  11   86.54   20.92
   1  -7 -11   82.35   13.36
   1   7 -10   69.00   12.46
  -1   7  10   62.51    8.07
  -1  -7  10   39.78   11.13
   1  -7 -10   42.89    8.78
   1   7  -9  263.43   25.74
  -1   7   9  257.41   25.46
  -1  -7   9  255.79   25.63
   1  -7  -9  229.61   22.47
   1   7  -8   81.42    8.60
  -1   7   8   85.78   16.14
  -1  -7   8   91.17   18.40
   1  -7  -8   78.22    9.51
   1   7  -7  273.95   18.44
  -1   7   7  235.23   15.86
  -1  -7   7  293.44   19.84
   1  -7  -7  247.49   16.64
  -1   7   6  265.55    9.46
   1   7  -6  315.83   13.37
  -1   7   6  200.32   12.22
  -1  -7   6  294.63    9.30
   1  -7  -6  259.73   18.73
   1  -7  -6  242.46   17.61
   1   7  -5   43.87    8.45
   1   7  -5   37.43    3.04
  -1   7   5   44.85    4.46
  -1   7   5   39.13    5.28
  -1  -7   5   52.59    9.26
  -1  -7   5   33.07    2.93
   1  -7  -5   45.85    7.12
   1  -7  -5   38.21    2.96
   1   7  -4  394.24    7.87
  -1   7   4  366.55   17.52
   1   7  -4  410.68   19.54
  -1   7   4  292.37   13.91
  -1  -7   4  409.21   19.45
   1  -7  -4  364.21   17.28
  -1  -7   4  355.03   17.33
   1  -7  -4  316.29    7.07
  -1   7   3 1145.75   13.95
   1   7  -3 1229.98   14.86
  -1   7   3  912.92   11.43
   1   7  -3 1384.99   16.82
  -1  -7   3 1353.21   16.52
  -1  -7   3 1200.10   14.66
   1  -7  -3 1016.92   12.74
   1  -7  -3 1218.55   15.07
   1   7  -2   24.56    4.96
   1   7  -2   27.96    3.57
  -1   7   2   16.15    2.87
   1  -7  -2   21.72    2.98
  -1  -7   2   27.76    3.98
  -1  -7   2   20.44    2.79
   1  -7  -2   10.95    2.15
   1   7  -1 1249.67   14.46
   1   7  -1 1449.23   16.51
  -1   7   1 1136.57   12.81
   1  -7  -1 1220.10   13.69
   1  -7  -1 1594.46   18.20
  -1  -7   1 1363.43   15.80
   1   7   0  758.56    9.29
   1   7   0  867.39   10.05
  -1   7   0  850.03    9.53
  -1  -7   0  792.25    9.81
   1  -7   0  763.54    9.39
   1  -7   0  803.77    9.10
  -1  -7   0  892.35   10.22
   1   7   1  669.97    8.46
  -1   7  -1  547.39    6.60
  -1   7  -1  519.91    7.29
  -1  -7  -1  671.42    9.10
   1  -7   1  607.66    7.48
  -1  -7  -1  637.49    7.66
   1   7   2  759.54    9.03
   1   7   2 1007.40   12.49
  -1  -7  -2 1052.09   12.80
   1  -7   2 1125.60   13.61
   1  -7   2 1185.25   13.87
  -1   7  -3  872.38   11.50
  -1   7  -3  744.86   10.21
   1   7   3  743.82   10.15
   1   7   3  603.86    7.77
   1  -7   3  836.73   12.28
   1  -7   3  858.97   11.47
  -1  -7  -3  715.20    9.01
  -1  -7  -3  775.60   10.22
  -1   7  -4  164.85   11.02
  -1   7  -4  147.31    7.51
   1   7   4  152.03    8.58
   1   7   4  119.98    6.44
   1  -7   4  179.41   11.94
   1  -7   4  157.01    8.05
  -1  -7  -4  139.78    7.05
  -1  -7  -4  149.61    7.70
  -1   7  -5  451.66   10.24
  -1   7  -5  364.85    8.25
   1   7   5  350.56    8.54
   1   7   5  340.92    7.47
   1  -7   5  406.45   14.09
   1  -7   5  393.22    9.07
  -1  -7  -5  385.94    9.45
  -1  -7  -5  387.06    8.79
   1   7   6   51.56   10.48
  -1   7  -6   51.76    7.24
  -1   7  -6   82.24    6.98
   1   7   6   53.36    7.53
   1  -7   6   63.82    8.86
  -1  -7  -6   82.76   11.24
   1   7   7   74.52    8.23
   1   7   7  131.13   15.60
  -1   7  -7  134.79   13.99
  -1  -7  -7  119.36   12.15
   1  -7   7  101.02   14.20
  -1   7  -8   87.38   11.42
   1   7   8   86.82   11.14
   1  -7   8   85.01   12.92
  -1  -7  -8   84.15    9.47
   1   7   9  899.50   44.72
  -1   7  -9  995.58   50.40
   1  -7   9  962.21   47.45
  -1  -7  -9  946.63   46.52
  -1   7 -10    5.82    3.08
   1   7  10    5.62    3.30
   1  -7  10    4.20    3.86
  -1  -7 -10    6.65    3.09
  -1   7 -11    7.91    4.36
   1   7  11    6.09    3.64
   1  -7  11    5.82    3.86
  -1  -7 -11    3.64    2.98
  -1   7 -12  109.18   20.69
   1   7  12   98.29   12.79
   1  -7  12  110.77   16.80
  -1  -7 -12  147.37   11.36
   1   9 -12  436.56   28.24
  -1   9  12  346.86   25.61
  -1  -9  12  373.01   24.42
   1  -9 -12  350.08   25.82
   1   9 -11    7.28    4.33
  -1   9  11    3.34    3.30
  -1  -9  11   16.69    6.22
   1  -9 -11    8.27    3.96
   1   9 -10  212.26   20.92
  -1   9  10  205.83   20.48
  -1  -9  10  258.05   25.34
   1  -9 -10  194.21   19.11
   1   9  -9  308.59   21.68
  -1   9   9  288.54   26.89
  -1  -9   9  322.11   21.73
   1  -9  -9  277.34   18.43
   1   9  -8   82.37   10.82
  -1   9   8   70.10    9.45
  -1  -9   8   83.78   13.72
   1  -9  -8   75.88   11.84
   1   9  -7  170.50   18.07
  -1   9   7  139.01   18.67
  -1  -9   7  136.41   17.08
   1  -9  -7  121.13   11.62
  -1   9   6 1295.63   31.90
   1   9  -6 1274.18   31.77
  -1  -9   6 1541.73   37.76
   1  -9  -6 1334.91   32.54
   1  -9  -6 1309.86   32.12
   1   9  -5   19.67    3.98
   1   9  -5   11.73    1.78
  -1   9   5   12.38    2.96
  -1   9   5   12.40    2.24
  -1  -9   5   14.69    2.81
   1  -9  -5   11.83    1.44
  -1  -9   5    9.38    1.77
   1  -9  -5    8.27    1.75
   1   9  -4 1195.71   20.17
   1   9  -4 1010.99   17.13
  -1   9   4 1045.04   18.68
  -1   9   4  749.93   12.95
  -1  -9   4 1152.24   19.39
  -1  -9   4 1068.32   17.99
   1  -9  -4  863.27   14.83
   1  -9  -4 1097.03   18.23
   1   9  -3  649.72   12.02
   1   9  -3  581.37   10.34
  -1   9   3  537.71   10.07
  -1   9   3  390.81    7.45
  -1  -9   3  650.13   11.75
  -1  -9   3  613.27   10.87
   1  -9  -3  439.27    8.51
   1  -9  -3  593.30   10.44
   1   9  -2    4.55    1.48
   1   9  -2    5.41    1.84
  -1   9   2    6.46    1.40
   1  -9  -2    4.53    1.29
  -1  -9   2    8.36    1.76
  -1  -9   2    8.42    1.40
   1  -9  -2    4.89    1.79
  -1   9   1  638.66    7.75
   1   9  -1  468.41    6.50
   1   9  -1  573.65    7.62
  -1   9   1  432.24    6.08
   1  -9  -1  619.28    8.15
  -1  -9   1  514.22    6.91
  -1  -9   1  539.13    7.42
   1   9   0 4600.05  209.61
   1   9   0 4220.44  192.27
  -1   9   0 4273.55   46.71
  -1   9   0 3961.29   42.64
   1  -9   0 4900.08  223.13
  -1  -9   0 4869.49  221.90
   1  -9   0 4241.05  193.31
  -1  -9   0 4315.91   46.65
   1   9   1    4.95    1.33
  -1   9  -1   -0.27    1.56
  -1   9  -1    3.40    1.40
   1  -9   1    2.83    1.20
  -1  -9  -1    4.14    1.11
  -1  -9  -1    3.84    1.37
   1  -9   1    1.19    0.60
   1   9   2  824.76   10.54
  -1   9  -2  665.32    9.19
  -1   9  -2  601.91    8.05
   1  -9   2  679.07    9.19
   1  -9   2  636.02    9.36
  -1   9  -3  234.30   11.70
  -1   9  -3  297.05   14.10
   1   9   3  253.27   12.30
   1   9   3  208.41    9.93
   1  -9   3  339.32   16.48
   1  -9   3  301.66   14.44
  -1  -9  -3  253.06   12.07
  -1  -9  -3  272.94   13.10
  -1   9  -4  836.15   16.51
  -1   9  -4  719.45   15.12
   1   9   4  656.93   13.58
   1   9   4  570.67   11.25
   1  -9   4  805.78   15.98
   1  -9   4  791.51   15.81
  -1  -9  -4  680.15   13.55
  -1  -9  -4  744.71   14.81
  -1   9  -5    6.88    2.00
   1   9   5    5.71    2.59
  -1   9  -5   10.18    1.84
   1   9   5    7.14    1.87
   1  -9   5    9.27    3.11
   1  -9   5   11.01    1.55
  -1  -9  -5   13.81    2.11
  -1  -9  -5   15.88    3.41
   1   9   6 1244.38   30.63
   1   9   6 1416.23   35.39
  -1   9  -6 1752.36   43.74
  -1  -9  -6 1493.00   36.67
   1  -9   6 1640.83   40.53
   1   9   7    7.56    2.85
   1   9   7   10.24    4.85
  -1   9  -7   11.42    4.81
  -1  -9  -7    3.52    2.01
   1  -9   7   11.94    4.04
  -1   9  -8   16.85    4.68
   1   9   8   16.03    4.62
   1  -9   8   17.24    4.80
  -1  -9  -8   12.84    3.35
  -1   9  -9  211.48   26.55
   1   9   9  162.68   22.59
   1  -9   9  201.00   26.57
  -1  -9  -9  186.42   19.25
  -1   9 -10   17.77    6.37
   1   9  10   13.52    6.37
   1  -9  10   11.69    3.84
  -1  -9 -10   17.58    4.24
  -1   9 -11   34.58   14.05
   1   9  11   33.65    8.00
   1  -9  11   49.97    9.51
  -1  -9 -11   30.66    9.62
  -1   9 -12  325.97   27.18
   1   9  12  293.88   20.14
   1  -9  12  359.74   23.94
  -1  -9 -12  368.84   23.75
  -1  11  12   31.43   13.12
   1  11 -12   19.24   12.87
   1 -11 -12   24.32    9.19
   1  11 -11  117.16   24.89
  -1  11  11   86.63   26.50
  -1 -11  11   62.73   25.04
   1 -11 -11   74.55   24.88
   1  11 -10    7.30    5.23
  -1  11  10    2.18    2.72
  -1 -11  10   20.77    6.72
   1 -11 -10    6.05    3.31
   1  11  -9  102.49    9.68
  -1  11   9   82.38    8.81
  -1 -11   9   93.12    9.37
   1 -11  -9   75.52    8.89
   1  11  -8  468.54   19.61
  -1  11   8  379.60   17.08
  -1 -11   8  447.14   18.95
   1 -11  -8  387.92   15.98
   1  11  -7   10.59    3.62
  -1  11   7    5.04    1.78
  -1 -11   7    6.32    3.21
   1 -11  -7    4.48    1.35
  -1  11   6  208.73   11.26
  -1  11   6  278.83   14.91
   1  11  -6  364.72   20.47
   1 -11  -6  287.76   15.32
  -1 -11   6  363.80   19.40
   1  11  -5  463.11   10.16
   1  11  -5  368.65    8.25
  -1  11   5  417.99   13.06
  -1  11   5  285.25    6.87
  -1 -11   5  432.13    9.91
  -1 -11   5  366.78    8.57
   1 -11  -5  343.64    7.91
   1 -11  -5  411.11   15.32
   1  11  -4    4.29    1.21
   1  11  -4    2.41    2.46
  -1  11   4    1.53    1.63
  -1  11   4    1.87    1.35
   1 -11  -4    1.12    0.91
  -1 -11   4    2.31    1.98
  -1 -11   4    8.35    3.37
   1  11  -3  807.12   14.25
   1  11  -3  669.40   11.74
  -1  11   3  645.28   11.59
   1 -11  -3  707.57   12.15
  -1 -11   3  796.08   14.00
  -1 -11   3  684.71   12.08
   1 -11  -3  508.83   10.16
  -1  11   2   61.13    5.93
  -1  11   2   48.29    5.57
   1  11  -2   55.98    6.93
   1  11  -2   56.12    6.63
  -1 -11   2   51.25    4.38
   1 -11  -2   68.99    7.77
   1 -11  -2   52.34    6.53
  -1 -11   2   52.19    5.81
   1 -11  -2   33.02    5.22
  -1  11   1  198.05   11.28
  -1  11   1  182.95   11.53
   1  11  -1  146.45    8.62
  -1  11   1  146.00    7.43
   1  11  -1  197.80    9.63
  -1 -11   1  172.96   10.16
   1 -11  -1  199.51   11.78
  -1 -11   1  166.52    9.71
  -1  11   0  228.94    4.44
   1  11   0  230.65    3.96
   1  11   0  237.66    4.21
  -1  11   0  238.83    3.68
   1 -11   0  267.44    4.01
  -1 -11   0  253.67    4.92
   1 -11   0  235.33    4.34
   1  11   1 1345.06   15.46
  -1  11  -1 1029.66   13.05
  -1 -11  -1 1246.69   15.01
   1 -11   1 1339.12   15.38
  -1 -11  -1 1024.51   12.07
   1  11   2  502.21   23.40
   1  11   2  314.49    5.55
  -1  11  -2  424.21    7.15
   1 -11   2  416.48   19.46
  -1 -11  -2  483.58    6.75
   1 -11   2  366.90    6.10
  -1 -11  -2  256.56   12.49
  -1  11  -3   79.49    6.17
  -1  11  -3   67.99    4.25
   1  11   3   68.30    5.84
  -1 -11  -3   56.53    3.71
   1 -11   3   78.47    6.78
   1 -11   3   77.95    7.50
  -1 -11  -3   58.36    5.27
   1  11   4  483.20   10.63
  -1  11  -4  510.88   11.62
   1  11   4  393.24    8.09
  -1 -11  -4  565.89   11.80
   1 -11   4  590.42   12.11
  -1 -11  -4  474.77    9.68
   1 -11   4  544.95   11.49
  -1  11  -5   26.97    6.17
  -1  11  -5   21.69    3.25
   1  11   5   31.47    4.52
   1  11   5   17.29    2.70
   1 -11   5   31.35    4.93
   1 -11   5   18.68    3.73
  -1 -11  -5   24.20    3.38
  -1 -11  -5   20.96    3.30
   1  11   6  273.73   14.29
   1  11   6  372.89   42.66
  -1  11  -6  446.06   23.30
  -1 -11  -6  353.54   18.34
   1 -11   6  426.10   22.29
   1  11   7   28.68    6.49
   1  11   7   46.99    9.67
  -1  11  -7   51.10   12.59
  -1 -11  -7   40.26    6.68
   1 -11   7   46.65    8.17
  -1  11  -8    8.24    4.23
   1  11   8    9.15    4.33
   1 -11   8   -0.10    3.24
  -1 -11  -8    2.94    2.34
  -1  11  -9   11.89    2.81
   1  11   9   20.66    4.03
   1 -11   9   12.61    4.20
  -1 -11  -9   17.09    3.99
  -1  11 -10    2.04    4.49
   1  11  10    4.90    3.54
   1 -11  10    4.64    4.13
  -1 -11 -10    3.47    2.55
  -1  11 -11   89.16   30.47
   1  11  11   97.71   15.79
   1 -11  11   81.34   22.52
  -1 -11 -11   84.55   15.93
   1  13 -11  570.77   48.94
  -1  13  11  485.94   40.92
  -1 -13  11  542.75   46.13
   1 -13 -11  462.49   38.78
   1  13 -10  471.32   23.76
  -1  13  10  366.39   18.73
  -1 -13  10  445.37   22.67
   1 -13 -10  388.48   20.06
   1  13  -9   54.51   14.27
  -1  13   9   59.43    5.27
  -1 -13   9   42.64   12.28
   1 -13  -9   65.61   10.27
   1  13  -8    1.74    2.58
  -1  13   8    4.71    2.35
  -1 -13   8   13.04    4.28
   1 -13  -8    5.98    2.89
   1  13  -7  380.97   44.84
  -1  13   7  307.87   37.47
  -1 -13   7  349.31   26.31
   1 -13  -7  299.32   25.46
  -1  13   6  402.69   13.76
  -1  13   6  560.24   17.77
   1  13  -6  704.79   22.19
   1 -13  -6  522.24   19.39
  -1 -13   6  641.57   20.25
   1  13  -5 1506.78   37.25
   1  13  -5 1209.71   29.54
  -1  13   5 1228.75   30.12
   1 -13  -5 1231.01   30.05
  -1 -13   5 1465.71   35.84
   1 -13  -5 1084.37   28.67
   1  13  -4  841.49   16.16
   1  13  -4  715.87   13.59
  -1  13   4  660.27   12.74
   1 -13  -4  699.00   13.20
  -1 -13   4  825.64   16.47
  -1 -13   4  681.85   13.18
   1 -13  -4  542.46   10.81
   1  13  -3  320.86    7.55
   1  13  -3  273.46    6.44
  -1  13   3  206.36   10.55
   1 -13  -3  285.07    7.49
  -1 -13   3  334.05    7.73
  -1 -13   3  280.01    6.65
   1 -13  -3  184.22    8.65
  -1  13   2  940.00   15.44
   1  13  -2  805.08   15.12
   1  13  -2  653.41   11.41
  -1  13   2  606.49   10.53
   1 -13  -2  852.68   14.41
  -1 -13   2  757.80   13.20
  -1 -13   2  683.54   11.91
   1  13  -1 1161.44   19.00
   1  13  -1  927.48   15.36
  -1  13   1  851.12   13.94
   1 -13  -1 1130.74   18.72
  -1 -13   1 1060.72   17.60
  -1 -13   1 1040.11   17.04
  -1  13   0  789.21   13.73
  -1  13   0  784.43   12.77
   1  13   0  802.03   13.49
   1 -13   0  856.07   13.93
  -1 -13   0  873.68   14.72
   1 -13   0  757.08   13.44
  -1  13  -1  880.99   14.23
   1  13   1  894.50   14.93
   1  13   1  910.17   14.90
  -1  13  -1  789.90   14.37
   1 -13   1  939.90   15.22
  -1 -13  -1  784.87   12.92
   1 -13   1  771.54   13.24
   1  13   2  529.79   10.37
  -1  13  -2  428.20    8.77
  -1  13  -2  405.49    7.40
   1  13   2  340.20    7.16
  -1 -13  -2  485.70   22.65
   1 -13   2  490.37    9.49
   1 -13   2  361.34   17.16
  -1 -13  -2  263.89   12.57
   1  13   3   26.64    3.56
   1  13   3    9.01    2.29
  -1  13  -3   11.77    1.86
  -1  13  -3   17.99    3.13
   1 -13   3   14.62    2.17
   1 -13   3   13.91    1.86
  -1 -13  -3    8.97    1.65
  -1  13  -4  635.38   14.74
  -1  13  -4  510.42   10.03
   1  13   4  486.59   10.36
  -1 -13  -4  539.57   12.50
   1 -13   4  594.42   11.84
   1 -13   4  530.41   10.86
  -1 -13  -4  451.82    8.90
  -1  13  -5   47.21    4.71
  -1  13  -5   37.92    4.63
   1  13   5   43.77    4.98
   1  13   5   35.35    4.37
  -1 -13  -5   39.32    3.77
  -1 -13  -5   51.56    6.33
   1 -13   5   57.74    8.04
   1  13   6  441.24   13.72
   1  13   6  533.77   18.25
  -1  13  -6  699.13   22.00
  -1 -13  -6  528.42   16.34
   1 -13   6  643.65   20.20
   1  13   7  400.08   15.73
   1  13   7  580.43   26.58
  -1  13  -7  699.26   27.50
  -1 -13  -7  573.53   26.01
   1 -13   7  673.19   26.32
  -1  13  -8    2.27    4.03
   1  13   8   -0.87    3.27
   1 -13   8    6.96    3.01
  -1 -13  -8    0.39    1.28
  -1  13  -9   16.49    4.75
   1  13   9   15.85    3.85
   1 -13   9    2.67    5.09
  -1 -13  -9    8.69    1.95
  -1  13 -10  309.47   29.82
   1  13  10  261.10   14.78
   1 -13  10  271.47   30.11
  -1 -13 -10  285.02   14.70
  -1  13 -11  191.88   33.51
   1  13  11  134.23   29.85
   1 -13  11  188.19   30.76
  -1 -13 -11  209.11    7.88
   1  15 -11    4.60    5.03
  -1  15  11   11.62    5.87
  -1 -15  11    7.42    4.60
   1 -15 -11    8.22    4.20
   1  15 -10    4.50    3.11
  -1  15  10    3.45    3.86
  -1 -15  10    7.77    5.56
   1 -15 -10    7.17    2.61
   1  15  -9    0.10    4.26
  -1  15   9    4.59    3.47
  -1 -15   9   10.53    4.80
   1 -15  -9    4.82    2.81
   1  15  -8  426.36   17.18
  -1  15   8  341.80   13.91
  -1 -15   8  439.80   17.34
   1 -15  -8  361.40   15.83
   1  15  -7   53.15   10.93
  -1  15   7   39.08    6.63
  -1 -15   7   46.89    8.70
   1 -15  -7   43.37    6.82
   1  15  -6   25.22    4.16
  -1  15   6   23.53    6.00
  -1 -15   6   17.94    4.27
   1 -15  -6   12.19    3.04
   1  15  -5  179.19   16.68
   1  15  -5  110.28   11.74
  -1  15   5  130.23   10.78
   1 -15  -5  112.66    9.91
  -1 -15   5  157.68   10.08
   1 -15  -5   92.88    6.85
   1  15  -4   21.08    3.41
   1  15  -4   13.01    2.42
  -1  15   4    4.83    2.15
   1 -15  -4    5.70    2.09
  -1 -15   4   12.99    1.99
  -1 -15   4    9.17    2.10
   1 -15  -4    6.40    3.34
  -1  15   3   16.38    2.66
   1  15  -3   23.13    3.70
   1  15  -3   17.44    2.21
  -1  15   3   13.54    2.21
   1 -15  -3   17.33    2.71
  -1 -15   3   24.96    4.08
  -1 -15   3   17.48    2.57
   1 -15  -3    6.27    2.06
  -1  15   2 1483.96   26.89
   1  15  -2 1292.42   25.02
   1  15  -2 1054.48   19.81
  -1  15   2  997.88   18.64
   1 -15  -2 1333.81   24.62
  -1 -15   2 1250.47   23.35
  -1 -15   2 1153.83   21.64
  -1  15   1   26.92    3.41
  -1  15   1   15.57    1.54
   1  15  -1   15.71    2.15
  -1  15   1   23.48    2.90
   1  15  -1   23.83    2.82
  -1 -15   1   23.11    2.43
   1 -15  -1   18.67    2.12
  -1 -15   1   18.65    2.45
   1  15   0  270.46   12.98
  -1  15   0  269.68   13.12
   1  15   0  251.90   12.17
  -1  15   0  252.21   12.11
  -1 -15   0  275.03   13.93
   1 -15   0  282.88   13.34
   1 -15   0  245.36   11.87
  -1 -15   0  242.46   11.90
   1  15   1   41.90    4.61
  -1  15  -1   47.98    6.00
   1  15   1   40.23    3.49
  -1  15  -1   29.72    2.68
   1 -15   1   51.76    5.04
  -1 -15  -1   44.61    4.38
  -1 -15  -1   45.42    5.51
   1 -15   1   36.56    4.83
   1  15   2 1549.01   28.35
  -1  15  -2 1307.40   24.99
  -1  15  -2 1223.19   22.37
   1  15   2  926.37   18.51
  -1 -15  -2 1372.97   24.95
   1 -15   2 1487.85   27.12
   1 -15   2 1061.46   20.15
   1  15   3   93.28    7.15
  -1  15  -3   87.06    5.98
  -1  15  -3   83.21    8.30
   1  15   3   86.53    8.74
  -1 -15  -3  106.98    8.21
   1 -15   3   88.95    7.92
   1 -15   3   68.27    6.70
  -1 -15  -3   63.49    6.15
   1  15   4   92.14    7.84
   1  15   4   67.79    8.05
  -1  15  -4   62.74    4.77
  -1  15  -4   81.81    8.30
   1 -15   4   61.73    4.73
   1 -15   4   59.26    6.52
  -1 -15  -4   58.19    6.34
   1  15   5    7.91    2.54
  -1  15  -5    2.80    1.20
  -1  15  -5   12.63    3.48
   1 -15   5   -1.24    2.27
  -1 -15  -5    3.90    1.88
  -1  15  -6  214.27   19.52
   1  15   6  173.58   13.53
   1 -15   6  237.37   18.23
  -1 -15  -6  173.29   15.50
  -1  15  -7   92.62   10.17
   1  15   7   68.22   11.69
   1 -15   7   73.00   16.00
  -1 -15  -7   73.82   11.54
  -1  15  -8  382.38   49.35
   1  15   8  290.40   37.68
   1 -15   8  391.56   20.68
  -1 -15  -8  341.49   17.63
  -1  15  -9    7.31    3.09
   1  15   9    3.67    2.51
   1 -15   9    5.98    2.85
  -1  15 -10   17.71    5.67
   1  15  10   29.98    5.73
   1 -15  10   27.91    7.91
  -1 -15 -10   23.96    7.10
   1  15  11   21.96    8.43
   1 -15  11   10.08    4.21
  -1 -15 -11   24.97    4.91
   1  17 -11   41.12   11.53
  -1  17  11   25.24    6.17
  -1 -17  11   33.47    9.47
   1 -17 -11   24.72   11.83
   1  17 -10   30.47   12.17
  -1  17  10   34.79    9.65
  -1 -17  10   47.24   10.32
   1 -17 -10   26.17    8.02
   1  17  -9   29.87   10.58
  -1  17   9   30.78    5.88
  -1 -17   9   30.13    7.82
   1 -17  -9   36.00    5.05
   1  17  -8    9.92    3.40
  -1  17   8   12.39    3.99
  -1 -17   8   14.83    5.56
   1 -17  -8    8.05    3.36
   1  17  -7   31.88    7.58
  -1  17   7   35.75    6.66
  -1 -17   7   28.78    7.08
   1 -17  -7   25.12    6.77
   1  17  -6  110.03   10.00
  -1  17   6   72.15    6.68
  -1 -17   6  129.81   17.53
   1 -17  -6   88.84    7.74
  -1  17   5  223.01   14.99
   1  17  -5  279.24   18.77
  -1 -17   5  287.05   19.80
   1 -17  -5  220.47   14.66
   1 -17  -5  199.88   17.01
  -1  17   4  160.52    9.93
   1  17  -4  127.53    8.72
   1  17  -4  127.25   11.99
  -1  17   4   99.35    7.76
   1 -17  -4  146.64   12.77
  -1 -17   4  140.02    9.29
   1 -17  -4   81.67    6.03
  -1  17   3  513.01   11.25
   1  17  -3  470.25   10.40
   1  17  -3  374.10    8.07
  -1  17   3  335.93    7.35
   1 -17  -3  532.93   16.59
  -1 -17   3  426.02    9.52
  -1 -17   3  386.33    8.43
   1 -17  -3  261.28    6.54
  -1  17   2    5.39    1.59
   1  17  -2    7.45    2.09
   1  17  -2    2.43    1.46
  -1  17   2    1.66    1.21
   1 -17  -2    3.09    1.66
  -1 -17   2    6.05    2.67
  -1 -17   2    0.33    1.47
  -1  17   1    5.83    1.21
  -1  17   1    3.49    1.46
   1  17  -1    5.68    1.00
  -1  17   1    4.75    1.59
   1  17  -1    5.75    2.03
  -1 -17   1    4.10    1.70
   1 -17  -1    3.65    1.92
  -1 -17   1    4.43    1.96
   1  17   0   86.61    5.06
  -1  17   0  108.37   10.24
   1  17   0   84.42    4.87
  -1  17   0   96.61    6.74
   1 -17   0  107.57    7.93
  -1 -17   0   89.19    5.14
   1 -17   0   87.59    7.66
  -1 -17   0   85.92    9.03
  -1  17  -1  382.45    8.91
  -1  17  -1  348.67    7.39
   1  17   1  345.31    9.13
   1 -17   1  365.75    7.78
  -1 -17  -1  397.15    8.78
  -1 -17  -1  385.90    8.13
   1 -17   1  356.67    9.10
   1  17   2  108.25    9.14
   1  17   2   51.75    3.54
  -1  17  -2   87.60    7.51
  -1  17  -2   97.75   11.53
   1 -17   2   84.60    4.71
  -1 -17  -2   76.65    3.99
   1 -17   2   71.26    5.60
   1  17   3  600.03   11.92
  -1  17  -3  508.25   10.97
  -1  17  -3  439.11    8.85
   1  17   3  367.65   11.46
  -1 -17  -3  570.39   10.79
   1 -17   3  547.85   10.85
   1 -17   3  419.76   15.04
  -1 -17  -3  315.55    7.42
   1  17   4   46.14    8.12
  -1  17  -4   55.32   10.19
  -1  17  -4   45.15    3.93
   1  17   4   36.15    5.84
  -1 -17  -4   58.10    5.85
   1 -17   4   57.64    8.18
  -1 -17  -4   34.53    4.14
   1  17   5  151.67   15.08
  -1  17  -5  136.77   11.13
  -1  17  -5  162.98   11.82
   1 -17   5  164.64   13.67
  -1 -17  -5  118.45    9.40
  -1  17  -6  159.15   23.85
   1  17   6  110.89   12.48
   1 -17   6  149.69   11.89
  -1 -17  -6  120.34   14.26
  -1  17  -7   95.56   22.73
   1  17   7   78.86   15.84
   1 -17   7   79.94   19.31
  -1 -17  -7   80.21   14.82
  -1  17  -8    4.92    2.07
   1  17   8   10.60    3.42
   1 -17   8    5.48    3.46
  -1 -17  -8    3.04    2.29
  -1  17  -9  147.52   29.55
   1  17   9  114.87   15.28
   1 -17   9  131.27   15.01
  -1 -17  -9   86.60   17.26
  -1  17 -10   15.20    5.34
   1  17  10    5.06    4.66
   1 -17  10    0.31    3.88
  -1 -17 -10    8.15    3.25
  -1  17 -11   13.97    4.97
   1  17  11   12.29    3.31
   1 -17  11   21.93    7.50
  -1 -17 -11   21.25    6.40
   1  19 -11   13.85    4.93
  -1  19  11    6.90    3.46
  -1 -19  11   13.05    5.89
   1 -19 -11    2.10    2.02
   1  19 -10   51.43   14.94
  -1  19  10   56.08   11.48
  -1 -19  10   52.92   13.91
   1 -19 -10   34.20    9.80
   1  19  -9  375.61   19.60
  -1  19   9  249.07   14.88
  -1 -19   9  375.33   19.66
   1 -19  -9  290.36   25.77
   1  19  -8  923.15   38.32
  -1  19   8  685.76   28.73
  -1 -19   8  929.21   38.57
   1 -19  -8  701.94   29.25
   1  19  -7  252.00   31.91
  -1  19   7  181.28   23.23
  -1 -19   7  193.53   20.27
   1 -19  -7  130.27   18.97
   1  19  -6  115.68   14.19
  -1  19   6   74.85   10.88
  -1 -19   6   98.57   14.73
   1 -19  -6   62.67    8.54
  -1  19   5    2.14    0.95
  -1  19   5    3.65    1.61
   1  19  -5    7.38    2.16
  -1 -19   5    1.85    2.46
   1 -19  -5    0.64    0.93
   1 -19  -5    1.93    2.68
  -1  19   4  882.62   22.41
   1  19  -4  808.06   21.44
   1  19  -4  600.93   15.81
  -1  19   4  531.63   16.07
   1 -19  -4  813.16   21.53
  -1 -19   4  764.06   20.01
   1 -19  -4  432.77   15.41
  -1  19   3 1198.70   29.45
   1  19  -3 1017.03   26.80
   1  19  -3  805.26   21.49
  -1  19   3  748.71   20.66
   1 -19  -3 1065.26   26.83
  -1 -19   3 1051.59   26.54
  -1 -19   3  866.91   22.05
   1 -19  -3  562.00   14.93
  -1  19   2 1139.91   27.46
   1  19  -2 1097.58   27.17
   1  19  -2  959.09   23.63
  -1  19   2  758.09   18.91
   1 -19  -2 1095.19   26.78
  -1 -19   2 1084.67   26.74
  -1 -19   2  926.53   22.91
  -1  19   1  745.00   16.89
  -1  19   1  792.12   14.52
   1  19  -1  734.43   13.75
  -1  19   1  531.16   10.06
   1  19  -1  707.85   13.71
   1 -19  -1  682.43   13.11
  -1 -19   1  785.07   14.72
  -1 -19   1  623.90   11.99
  -1  19   0  462.96   10.32
   1  19   0  455.92    9.34
   1  19   0  422.68    8.81
  -1  19   0  415.13    8.28
  -1 -19   0  487.94   10.52
   1 -19   0  473.56    9.22
   1 -19   0  425.87   12.04
  -1 -19   0  390.75    8.30
  -1  19  -1  136.49   11.99
   1  19   1  122.21   10.12
  -1  19  -1   97.54    7.70
   1  19   1  106.43    9.51
   1 -19   1  116.04    8.70
  -1 -19  -1  132.47   12.36
  -1 -19  -1  117.34   10.75
   1 -19   1   91.22    8.18
   1  19   2 1297.62   31.42
  -1  19  -2 1085.32   27.07
  -1  19  -2 1144.65   27.78
   1  19   2  825.96   20.72
  -1 -19  -2 1072.16   25.99
   1 -19   2 1352.17   32.56
   1 -19   2  977.10   24.21
   1  19   3  710.10   18.39
  -1  19  -3  629.76   17.05
  -1  19  -3  512.30   13.41
   1  19   3  411.86   12.93
  -1 -19  -3  689.68   20.59
   1 -19   3  676.82   17.41
  -1 -19  -3  368.64   10.41
   1  19   4 1296.78   38.33
  -1  19  -4 1159.13   34.78
  -1  19  -4  930.11   27.47
   1  19   4  838.61   25.37
  -1 -19  -4 1358.43   39.46
   1 -19   4 1228.82   36.45
  -1 -19  -4  766.36   22.83
  -1  19  -5  728.31   14.63
  -1  19  -5  561.00   10.71
   1  19   5  534.12   15.25
  -1 -19  -5  836.22   14.97
   1 -19   5  765.63   14.51
  -1 -19  -5  520.46   11.22
  -1  19  -6   58.79   10.57
   1  19   6   32.72    6.60
   1 -19   6   61.42    9.92
  -1 -19  -6   31.10    4.77
  -1  19  -7   60.54   13.56
   1  19   7   44.37    7.97
   1 -19   7   54.95    7.66
  -1 -19  -7   45.15    7.56
  -1  19  -8  719.15   33.51
   1  19   8  531.04   23.08
   1 -19   8  735.05   30.77
  -1 -19  -8  582.75   24.35
  -1  19  -9  286.09   30.94
   1  19   9  185.89   20.51
   1 -19   9  251.24   29.67
  -1 -19  -9  203.60   24.85
  -1  19 -10  310.65   27.07
   1  19  10  259.07   23.57
   1 -19  10  288.06   24.85
  -1 -19 -10  264.97   25.63
   1  21 -10    1.66    3.01
  -1  21  10    4.02    2.17
  -1 -21  10    8.26    3.53
   1 -21 -10   -2.37    2.73
   1  21  -9  153.89   26.22
  -1  21   9  123.16   15.48
  -1 -21   9   91.23   28.18
   1 -21  -9  101.40   21.05
   1  21  -8  167.89   21.60
  -1  21   8   83.69   17.91
  -1 -21   8  133.73   13.71
   1 -21  -8   75.60   12.75
   1  21  -7   22.78    4.39
  -1  21   7   25.96    3.99
  -1 -21   7   21.45    4.21
   1 -21  -7   22.85    5.09
   1  21  -6   91.68   20.57
  -1  21   6   58.31   11.94
  -1 -21   6   80.64   16.42
   1 -21  -6   41.93    7.54
   1  21  -5  510.57   20.58
  -1  21   5  307.60   12.79
  -1 -21   5  484.19   19.52
   1 -21  -5  296.75   12.31
  -1  21   4   75.95   12.99
  -1  21   4   52.48    6.08
   1  21  -4   80.57   12.07
  -1 -21   4   76.03   11.25
   1 -21  -4   62.82    9.89
   1 -21  -4   36.92    6.91
  -1  21   3  453.78   68.23
   1  21  -3  412.25   13.64
   1  21  -3  326.45   23.48
  -1  21   3  287.89   12.24
   1 -21  -3  423.54   64.16
  -1 -21   3  427.90   14.10
   1 -21  -3  213.57   14.36
  -1  21   2   63.61    8.16
   1  21  -2   83.43    7.65
   1  21  -2   68.79    6.17
  -1  21   2   57.17    5.17
   1 -21  -2   65.55    8.07
  -1 -21   2   79.09    8.57
  -1 -21   2   40.54    6.05
  -1  21   1    4.55    1.08
   1  21  -1    4.46    2.46
   1  21  -1    5.32    2.47
  -1  21   1    1.83    1.85
  -1  21   1    6.11    1.75
  -1 -21   1    4.85    1.51
   1 -21  -1    3.95    2.25
  -1 -21   1    2.39    1.19
  -1  21   0  357.26   14.60
   1  21   0  369.80   10.58
  -1  21   0  304.15    8.21
   1  21   0  332.02    9.13
   1 -21   0  407.10   13.43
  -1 -21   0  379.45   11.29
   1 -21   0  316.76   10.88
  -1 -21   0  361.61   20.25
   1  21   1  256.45   14.18
  -1  21  -1  273.69   16.08
   1  21   1  231.52   13.65
  -1  21  -1  230.89   13.33
  -1 -21  -1  287.29   15.30
   1 -21   1  272.73   16.44
  -1 -21  -1  238.36   18.94
   1 -21   1  221.63   17.37
   1  21   2    3.11    1.43
   1  21   2    5.82    2.86
  -1  21  -2    0.66    1.15
  -1  21  -2    4.60    3.46
   1 -21   2    2.99    1.67
  -1 -21  -2    7.43    2.31
   1  21   3  415.65   26.84
  -1  21  -3  336.49   23.79
  -1  21  -3  324.81   14.05
   1  21   3  273.61   21.14
  -1 -21  -3  356.54   22.99
   1 -21   3  402.54   60.58
  -1 -21  -3  246.31   13.10
  -1  21  -4    3.66    2.90
  -1  21  -4    5.13    2.55
   1  21   4    6.92    2.29
  -1 -21  -4    8.18    2.29
   1 -21   4    3.68    2.15
  -1 -21  -4    1.69    1.33
   1  21   5   71.51    8.08
  -1  21  -5  150.80   17.77
   1 -21   5  110.61   16.37
  -1 -21  -5   85.87   12.39
  -1 -21  -5   79.86   11.60
   1  21   6  202.87   23.79
  -1  21  -6  346.89   66.78
   1 -21   6  333.45   32.93
  -1 -21  -6  330.21   32.01
  -1 -21  -6  240.48   24.26
  -1  21  -7   25.40    6.43
   1  21   7   13.04    4.79
   1 -21   7   16.82    5.21
  -1 -21  -7   10.91    3.45
  -1  21  -8   -0.36    3.04
   1  21   8    7.61    3.15
   1 -21   8    9.13    3.14
  -1 -21  -8    2.53    1.29
  -1  21  -9  119.43   19.48
   1  21   9   74.52   19.78
   1 -21   9  152.68   18.18
  -1 -21  -9   95.35   17.34
  -1  21 -10    2.00    4.55
   1  21  10    6.70    4.26
   1 -21  10    7.53    3.78
  -1 -21 -10   -0.23    2.43
   1  23 -10    2.60    4.34
  -1  23  10   11.34    5.83
  -1 -23  10    6.45    4.65
   1 -23 -10    3.77    2.93
   1  23  -9  319.47   22.07
  -1  23   9  147.77   34.68
  -1 -23   9  325.73   22.14
   1 -23  -9  226.59   17.94
   1  23  -8   94.55   12.04
  -1  23   8   38.86    9.61
  -1 -23   8   83.80   13.65
   1 -23  -8   47.04   10.55
   1  23  -7  120.07   17.41
  -1  23   7   75.64   12.66
  -1 -23   7  145.42   13.54
   1 -23  -7   81.93    9.51
   1  23  -6  193.32   17.88
  -1  23   6  114.37   14.23
  -1 -23   6  189.74   14.06
   1 -23  -6  115.21   10.36
   1  23  -5  126.93   21.40
  -1  23   5   74.51   12.12
  -1 -23   5  105.39   23.36
   1 -23  -5   60.05   11.09
  -1  23   4    6.39    2.33
   1  23  -4   16.31    4.07
  -1  23   4    3.16    1.84
  -1 -23   4    5.80    2.56
   1 -23  -4    3.56    1.55
   1  23  -3  999.22   18.51
   1  23  -3  794.07   14.28
  -1 -23   3 1029.76   18.31
   1 -23  -3  932.54   16.32
   1 -23  -3  497.94   10.22
   1  23  -2   56.69    9.82
  -1  23   2   62.14    8.89
  -1  23   2   52.45    5.12
   1  23  -2   76.82   10.39
  -1 -23   2   70.65    5.93
   1 -23  -2   56.63    8.44
   1  23  -1  517.19   17.60
   1  23  -1  470.03   14.63
  -1  23   1  497.88   15.31
  -1  23   1  341.67   10.84
  -1  23   1  520.04   16.70
  -1 -23   1  531.85   16.84
   1 -23  -1  466.95   14.91
  -1 -23   1  426.72   13.42
   1  23   0  137.14   16.12
  -1  23   0  126.96   17.98
  -1  23   0  106.64    7.28
   1  23   0  104.24   10.55
   1 -23   0  147.50   13.56
  -1 -23   0  149.50   16.22
  -1 -23   0  117.01    9.24
  -1  23  -1   61.22    9.23
   1  23   1   66.11   12.35
   1  23   1   52.26    7.14
  -1  23  -1   45.85    6.22
   1 -23   1   52.45    6.64
  -1 -23  -1   64.55   10.13
  -1 -23  -1   36.88    6.21
  -1  23  -2    1.99    2.53
   1  23   2    1.64    1.44
  -1  23  -2    4.67    1.86
   1  23   2    4.40    2.00
   1 -23   2    7.91    2.72
  -1 -23  -2    3.57    1.29
   1  23   3  761.16   14.81
  -1  23  -3  946.15   16.21
  -1  23  -3  989.63   18.49
   1 -23   3 1202.65   20.48
  -1 -23  -3  994.11   17.64
  -1 -23  -3  651.32   19.16
  -1  23  -4   16.93    4.72
  -1  23  -4   14.11    2.86
   1  23   4    7.66    3.26
  -1 -23  -4   18.75    3.26
   1 -23   4   24.67    5.01
  -1 -23  -4    5.96    2.02
   1  23   5   51.06    9.41
  -1  23  -5   66.58   13.71
   1 -23   5   68.66   13.27
  -1 -23  -5   44.97    8.83
  -1 -23  -5   42.88    8.55
  -1  23  -6  133.55   15.20
   1  23   6   80.72   12.29
   1 -23   6  122.26   20.42
  -1 -23  -6   90.88   12.38
  -1  23  -7   -1.01    3.51
   1  23   7    1.03    3.13
   1 -23   7    4.17    2.88
  -1 -23  -7    0.90    1.41
  -1  23  -8   27.55    7.92
   1  23   8   25.49    5.99
   1 -23   8   12.43    3.42
  -1 -23  -8   13.97    4.99
  -1  23  -9  214.65   45.04
   1  23   9  110.05   26.65
   1 -23   9  267.12   26.08
  -1 -23  -9  161.73   26.91
  -1  23 -10    5.09    5.68
   1  23  10    8.40    3.93
   1 -23  10    5.51    4.13
   1  25  -9   68.21   22.00
  -1  25   9   19.05    7.08
  -1 -25   9   61.09   15.67
   1 -25  -9   38.49   11.77
   1  25  -8   -0.34    4.45
  -1  25   8    3.37    1.95
  -1 -25   8   11.24    4.72
   1 -25  -8    4.03    3.08
   1  25  -7   96.20   19.09
  -1  25   7   66.73    7.61
  -1 -25   7  111.30   16.64
   1 -25  -7   70.52   11.06
   1  25  -6 1071.76   44.09
  -1  25   6  623.78   26.07
  -1 -25   6 1040.03   42.70
   1 -25  -6  657.89   27.36
   1  25  -5    3.90    3.69
  -1  25   5    1.01    2.65
  -1 -25   5    8.69    4.48
   1 -25  -5    5.15    3.63
  -1  25   4  335.51   26.40
   1  25  -4  355.56   33.66
  -1  25   4  194.53   20.89
  -1 -25   4  340.92   27.15
   1 -25  -4  166.93   19.42
  -1  25   3    9.60    2.65
  -1  25   3   17.50    2.88
   1  25  -3   25.50    6.21
  -1 -25   3   20.13    3.69
   1 -25  -3    9.98    2.52
   1  25  -2   62.60   10.09
  -1  25   2   48.24   10.70
   1  25  -2   57.71    9.19
  -1  25   2   61.74    9.08
  -1 -25   2   68.80   11.54
   1  25  -1  216.96   23.77
   1  25  -1  177.95   16.65
  -1  25   1  178.96   16.11
  -1  25   1  156.53   12.10
  -1  25   1  242.80   24.52
  -1 -25   1  239.35   23.93
  -1  25   0 1102.38   20.68
   1  25   0 1100.29   19.26
  -1  25   0  940.87   15.93
   1  25   0  925.41   16.57
   1 -25   0 1148.46   19.24
  -1 -25   0 1128.02   19.77
  -1 -25   0  898.47   15.83
   1  25   1  335.23   27.08
  -1  25  -1  320.05   24.01
   1  25   1  284.63   21.10
  -1  25  -1  267.75   19.89
  -1 -25  -1  359.57   27.08
   1 -25   1  346.49   25.72
  -1 -25  -1  290.81   21.52
   1  25   2  394.36   11.13
   1  25   2  394.42   14.19
  -1  25  -2  385.90    7.84
  -1  25  -2  478.23   11.85
   1 -25   2  465.71    9.40
  -1 -25  -2  472.60   16.79
  -1  25  -3   27.77    4.74
  -1  25  -3   16.88    3.35
   1  25   3   18.45    3.37
  -1 -25  -3   21.80    3.64
   1 -25   3   36.45    5.61
  -1 -25  -3   11.08    2.44
   1  25   4   38.32    6.87
  -1  25  -4   30.40    7.04
  -1  25  -4   60.43   12.57
   1 -25   4   62.93   10.60
  -1 -25  -4   54.35    8.82
  -1 -25  -4   33.10    6.50
   1  25   5   14.67    2.99
  -1  25  -5    9.51    4.22
   1 -25   5   18.23    4.05
  -1 -25  -5    4.07    1.91
  -1 -25  -5    7.10    3.22
  -1  25  -6  729.20   30.89
   1  25   6  419.79   20.85
   1 -25   6  760.91   33.12
  -1 -25  -6  495.47   20.72
  -1  25  -7  136.64   18.51
   1  25   7   64.88   12.31
   1 -25   7  128.67   15.01
  -1 -25  -7   78.96   14.65
  -1  25  -8   60.51   13.26
   1  25   8   31.06    9.30
   1 -25   8   71.46   12.79
  -1 -25  -8   41.77   11.21
  -1  25  -9   31.86   10.45
   1  25   9   25.69    5.12
   1 -25   9   21.21    8.80
   1  27  -9    6.86    3.70
  -1  27   9    4.15    3.35
  -1 -27   9    4.53    3.99
   1 -27  -9    2.93    1.74
   1  27  -8   22.32    6.17
  -1  27   8   14.81    4.19
  -1 -27   8   19.44    5.32
   1 -27  -8    8.22    3.45
   1  27  -7    5.76    2.28
  -1  27   7   -0.26    2.71
  -1 -27   7    8.99    4.22
   1 -27  -7    4.03    1.80
   1  27  -6    2.24    2.53
  -1 -27   6    2.87    2.56
   1 -27  -6    2.74    1.88
   1  27  -5  257.32   22.29
  -1  27   5  138.43   18.95
  -1 -27   5  255.76   23.70
   1 -27  -5  154.37   13.79
   1  27  -4   28.26    4.94
  -1  27   4   16.21    5.39
  -1 -27   4   25.86    5.48
   1 -27  -4   19.92    4.19
  -1  27   3   19.03    4.21
   1  27  -3   22.20    5.68
  -1  27   3   27.06    5.66
  -1 -27   3   33.46    7.57
   1 -27  -3   18.53    4.37
  -1  27   2  102.99   18.12
   1  27  -2  132.64   11.75
  -1  27   2   99.70   22.94
  -1 -27   2  131.23   31.01
  -1  27   1  116.40   14.43
  -1  27   1  113.54   15.12
   1  27  -1  150.11   19.06
  -1 -27   1  164.54   20.09
   1  27   0    8.00    1.83
  -1  27   0    7.72    3.58
  -1  27   0   17.56    2.92
   1  27   0   11.79    3.02
   1 -27   0   11.35    3.05
  -1 -27   0    7.90    2.46
  -1  27  -1  220.80   24.81
   1  27   1  160.39   18.88
  -1  27  -1  116.47   16.42
   1 -27   1  203.48   22.22
  -1 -27  -1  196.22   20.76
  -1 -27  -1  143.12   15.70
   1  27   2    7.43    3.81
  -1  27  -2    7.00    2.70
  -1  27  -2   12.27    4.27
   1 -27   2    6.09    3.10
  -1 -27  -2    3.63    1.77
  -1  27  -3  240.83   23.60
  -1  27  -3  152.93   18.44
   1  27   3  189.67   24.15
  -1 -27  -3  211.11   20.94
   1 -27   3  221.25   25.17
  -1 -27  -3   98.17   15.78
  -1  27  -4    5.79    2.50
   1  27   4   10.32    3.94
   1 -27   4    4.07    2.20
  -1 -27  -4    7.15    2.86
  -1  27  -5  130.12   17.23
   1  27   5   81.36   13.53
   1 -27   5   96.83   19.48
  -1 -27  -5   68.44   10.35
  -1  27  -6   23.84    6.80
   1  27   6    6.64    4.05
   1 -27   6   15.74    6.64
  -1 -27  -6   16.01    4.65
  -1  27  -7   62.16    9.94
   1  27   7   18.86    6.83
   1 -27   7   39.84    8.38
  -1 -27  -7   33.51    7.04
  -1  27  -8   26.16    6.97
   1  27   8    5.70    4.89
   1 -27   8   15.75    4.91
  -1  27  -9   67.71   12.16
   1  27   9   26.43    6.47
   1 -27   9   50.14   15.30
   1  29  -8   75.94   26.09
  -1  29   8   49.24   13.19
  -1 -29   8   81.23   20.65
   1 -29  -8   38.17   13.63
   1  29  -7  102.94   24.62
  -1  29   7   58.35   14.89
  -1 -29   7   83.81   25.30
   1 -29  -7   71.54   13.38
   1  29  -6  143.20   21.97
  -1  29   6   91.11   14.91
  -1 -29   6  124.46   27.23
   1 -29  -6   91.34    8.73
   1  29  -5  337.33   17.99
  -1  29   5  222.03   21.36
  -1 -29   5  358.91   16.38
   1 -29  -5  183.46   24.21
   1  29  -4    3.20    1.85
  -1  29   4   -0.68    1.74
  -1 -29   4    2.25    2.16
   1 -29  -4   -0.86    2.47
   1  29  -3  100.39    9.32
  -1  29   3   60.49    8.54
  -1 -29   3  104.72    9.32
   1 -29  -3   57.82    8.81
  -1  29   2  120.46   16.20
  -1  29   2  115.14   17.66
   1  29  -2  197.27   24.47
  -1 -29   2  191.79   24.09
  -1  29   1  103.04   10.39
  -1  29   1  109.40   15.03
   1  29  -1  158.10   21.77
  -1 -29   1  146.91   18.54
   1  29   0  679.51   24.67
  -1  29   0  680.08   25.11
  -1  29   0  566.80   20.35
   1 -29   0  777.19   27.76
  -1 -29   0  747.59   28.07
   1  29   1  631.67   22.98
  -1  29  -1  631.04   22.32
  -1  29  -1  855.46   32.09
   1 -29   1  854.50   30.14
   1  29   2   28.64    5.31
  -1  29  -2   15.99    4.86
  -1  29  -2   24.72    7.43
   1 -29   2   29.38    7.83
  -1  29  -3  225.34   21.87
   1  29   3  172.68   16.28
   1 -29   3  198.84   19.87
  -1 -29  -3   91.14   10.42
  -1  29  -4  187.46   16.95
   1  29   4  119.95   17.61
   1 -29   4  182.18   16.06
  -1 -29  -4   77.32   13.71
  -1  29  -5  152.65   17.51
   1  29   5   84.91   13.89
   1 -29   5  100.81   20.81
  -1 -29  -5   58.90   11.42
  -1  29  -6  146.11   23.04
   1  29   6   86.78   20.14
   1 -29   6  176.29   25.01
  -1 -29  -6  112.51   14.82
  -1  29  -7  179.56   28.21
   1  29   7   84.56   20.71
   1 -29   7  221.37   18.82
  -1  29  -8   29.15    9.46
   1  29   8   19.30    6.29
   1 -29   8   26.36    8.00
   1  31  -7   -3.55    3.43
  -1  31   7    4.95    4.09
  -1 -31   7    8.83    4.18
   1 -31  -7    6.27    2.78
   1  31  -6    2.48    2.03
  -1  31   6    1.76    2.15
  -1 -31   6    5.42    4.75
   1 -31  -6    1.34    2.07
   1  31  -5  249.73   27.10
  -1  31   5  159.90   23.01
  -1 -31   5  255.51   26.91
   1 -31  -5   90.65   19.83
   1  31  -4  171.30   17.30
  -1  31   4  117.02   13.83
  -1 -31   4  169.68   17.77
   1 -31  -4   71.32    8.32
   1  31  -3   70.31    6.81
  -1  31   3   50.76    7.31
  -1 -31   3   68.88    8.90
   1 -31  -3   35.09    4.51
   1  31  -2  512.67   24.34
  -1  31   2  351.07   15.63
  -1 -31   2  532.88   22.60
   1  31  -1   66.67   11.16
  -1  31   1   42.13    6.80
  -1 -31   1   79.59    8.73
   1  31   0    8.86    2.82
  -1  31   0    3.89    2.23
  -1  31   0   -1.46    2.77
  -1 -31   0    6.49    1.98
  -1  31  -1  350.85   23.15
   1  31   1  252.32   11.96
   1 -31   1  371.27   16.54
  -1  31  -2   37.55    5.61
   1  31   2   25.52    3.59
   1 -31   2   34.24    3.15
  -1  31  -3   11.56    4.12
   1  31   3   12.01    4.15
   1 -31   3   18.05    4.19
  -1 -31  -3   13.52    4.50
  -1  31  -4  172.69   19.17
   1  31   4  130.27   14.37
   1 -31   4  123.83   17.08
  -1 -31  -4   61.92   12.71
  -1  31  -5  139.62   16.99
   1  31   5   86.31   14.83
   1 -31   5  101.09   29.57
  -1 -31  -5   58.57   11.70
  -1  31  -6    4.72    3.86
   1  31   6   12.46    3.85
   1 -31   6    3.31    2.14
  -1 -31  -6    4.39    2.06
  -1  31  -7   25.81   11.72
   1  31   7   32.80    6.76
   1 -31   7   16.02    8.84
   1  33  -7    1.40    4.05
  -1  33   7    3.94    3.18
  -1 -33   7    7.81    5.68
   1 -33  -7    2.21    2.58
   1  33  -6    8.35    5.78
  -1  33   6    8.62    3.02
  -1 -33   6   18.12    5.49
   1 -33  -6    4.30    2.13
   1  33  -5   27.35   10.04
  -1  33   5   36.47    7.28
  -1 -33   5   28.05   11.47
   1 -33  -5   17.58    4.60
   1  33  -4    6.39    4.07
  -1  33   4    2.43    1.40
  -1 -33   4   19.99    6.98
   1 -33  -4    1.60    2.16
   1  33  -3  220.93   26.17
  -1  33   3  113.02   20.88
  -1 -33   3  205.31   29.37
   1 -33  -3  105.79   15.88
   1  33  -2  337.33   17.26
  -1  33   2  200.54   24.81
  -1 -33   2  339.31   21.83
   1  33  -1    3.48    1.77
  -1  33   1    3.76    1.48
  -1 -33   1    4.68    2.81
   1  33   0  119.34   19.33
  -1  33   0   65.43   10.04
  -1  33   0  134.70   21.15
  -1 -33   0   91.38   16.05
  -1  33  -1   30.76    6.90
   1  33   1   16.05    4.77
   1 -33   1   19.73    4.56
  -1  33  -2   39.54    9.52
   1  33   2   27.08    4.84
   1 -33   2   27.30    6.20
  -1  33  -3  351.78   25.62
   1  33   3  168.46   30.72
   1 -33   3  329.33   13.66
  -1 -33  -3  156.75   16.84
  -1  33  -4    2.21    2.21
   1  33   4    5.84    2.72
   1 -33   4    5.45    2.39
  -1 -33  -4   -0.04    2.00
  -1  33  -5   14.40    5.52
   1  33   5    5.89    3.16
   1 -33   5    5.38    2.66
  -1 -33  -5    4.68    2.86
  -1  33  -6   34.24    5.05
   1  33   6   26.13    6.07
   1 -33   6   26.09    5.63
   1  35  -6   13.61    5.60
  -1 -35   6    8.56    5.03
   1 -35  -6    1.97    1.73
   1  35  -5  374.56   26.69
  -1 -35   5  357.41   28.10
   1 -35  -5  193.21   20.24
   1  35  -4    5.61    2.67
  -1 -35   4    3.89    3.76
   1 -35  -4   -0.61    2.41
   1  35  -3   86.91   19.73
  -1 -35   3   72.75   18.82
   1 -35  -3   30.27    8.32
   1  35  -2  535.24   29.50
  -1 -35   2  552.35   30.27
   1  35  -1  482.53   35.56
  -1 -35   1  498.11   28.31
   1  35   0  111.43   22.30
   1  35   0   67.70   14.39
  -1  35   0   96.11   21.64
  -1 -35   0   76.95   19.87
  -1  35  -1  581.66   39.55
   1  35   1  382.90   26.82
   1 -35   1  516.20   27.82
  -1  35  -2   59.76   10.51
   1  35   2   28.68    6.84
   1 -35   2   24.87    6.66
  -1  35  -3  161.78   27.40
   1  35   3   67.36   16.70
   1 -35   3   68.74   19.47
  -1 -35  -3   41.76   10.80
   1  35   4   85.23   21.92
  -1  35  -4  164.38   30.82
   1  35   5  377.60   27.03
  -1  35  -5  470.83   33.26
   1  37  -4    9.67    4.56
  -1 -37   4    5.32    3.46
   1 -37  -4   -1.59    2.60
   1  37  -3  170.77   28.99
  -1 -37   3   95.46   26.31
   1 -37  -3   53.04   14.96
   1  37  -2   11.95    3.45
  -1 -37   2    9.60    4.45
   1  37  -1    3.41    2.34
  -1 -37   1    2.34    2.55
   1  37   0   19.29    5.52
   1  37   1   16.81    4.25
  -1  37  -1   37.99    8.09
   1  37   2    1.90    2.41
  -1  37  -2   18.03    4.60
  -1 -37  -2   11.81    4.42
   1  37   3   67.51   22.27
  -1  37  -3  161.10   36.67
  -1  37  -4   11.57    3.05
   1  39  -2   28.18    5.78
   1  39  -1    6.42    2.51
  -1  39  -1    2.86    2.83
  -1  39  -2   25.53    5.73
  -2   0  12    2.50    2.82
   2   0 -12    4.29    3.86
  -2   0  11    4.44    4.00
   2   0 -11    1.23    3.40
  -2   0  10    9.80    4.31
   2   0 -10   16.62    3.27
  -2   0   9    4.82    3.30
   2   0  -9    4.67    3.73
  -2   0   8  761.32   17.89
   2   0  -8  779.34   16.40
  -2   0   7    4.45    1.85
   2   0  -7    3.39    3.14
  -2   0   6   98.30    6.06
   2   0  -6   84.11    6.77
   2   0  -6  107.64   10.62
  -2   0   6   90.26    8.52
   2   0  -5   -1.79    2.03
  -2   0   5    1.53    2.41
   2   0  -5    2.23    1.54
  -2   0   5   -0.05    2.51
  -2   0   4    8.33    2.43
   2   0  -4    1.49    1.37
   2   0  -4    9.35    2.41
  -2   0   4    3.79    1.18
  -2   0   3    3.65    1.44
   2   0  -3    3.14    1.15
   2   0  -3    2.62    1.94
  -2   0   3    3.85    2.11
  -2   0   2 4757.77  216.77
   2   0  -2 5330.92  242.84
   2   0  -2 5461.64  248.82
  -2   0   2 5157.70  234.97
  -2   0   1   -0.50    1.21
   2   0  -1    1.01    1.02
   2   0  -1   -1.26    1.22
  -2   0   1    2.28    1.34
   2   0   1    0.78    0.71
  -2   0  -1   -0.31    0.87
  -2   0  -1    1.32    0.83
   2   0   1   -0.64    0.82
   2   0   2 2126.25   24.06
  -2   0  -2 2013.01   22.57
  -2   0  -2 2363.11   25.99
   2   0   2 2379.38   26.14
   2   0   3   -3.73    1.78
  -2   0  -3    1.49    1.14
  -2   0  -3    1.23    1.05
   2   0   3    1.87    1.51
   2   0   4 2160.46   35.02
  -2   0  -4 2232.14   35.26
  -2   0  -4 2280.94   35.85
   2   0   4 2289.98   35.90
   2   0   5    1.26    2.63
  -2   0  -5    1.37    1.36
  -2   0  -5   10.41    3.49
   2   0   5    0.41    1.64
   2   0   6  317.12    9.53
  -2   0  -6  367.56   10.36
   2   0   6  298.94    8.41
   2   0   7    3.50    3.41
  -2   0  -7    5.09    2.38
   2   0   8  210.81   24.61
  -2   0  -8  203.59   23.74
   2   0   9    2.30    3.23
  -2   0  -9    1.18    1.23
   2   0  10  360.82   16.36
  -2   0 -10  375.71   16.61
   2   0  11    8.54    3.95
  -2   0 -11   13.72    5.68
   2   0  12   13.68    4.94
  -2   0 -12    3.70    4.16
  -2   2  12   53.27   19.62
   2   2 -12   84.17   16.29
  -2  -2  12   48.92   16.64
   2  -2 -12   79.12   16.47
   2   2 -11  230.22   26.38
  -2   2  11  238.65   27.56
  -2  -2  11  238.01   27.77
   2  -2 -11  212.98   27.75
  -2   2  10   37.56   10.20
   2   2 -10   47.02    7.50
  -2  -2  10   51.35   12.73
   2  -2 -10   53.77   12.25
  -2   2   9   30.72    6.55
   2   2  -9   24.22    5.49
  -2  -2   9   23.30    6.79
   2  -2  -9   23.45    6.16
   2   2  -8  776.29   15.61
  -2   2   8  739.79   15.31
  -2  -2   8  754.32   15.25
   2  -2  -8  690.04   14.28
   2   2  -7    3.20    2.32
  -2   2   7    5.42    2.88
  -2  -2   7    5.38    2.62
   2  -2  -7    0.78    1.35
   2   2  -6   10.23    2.06
   2   2  -6    2.95    1.65
  -2   2   6   12.88    2.49
  -2   2   6    8.06    3.37
  -2  -2   6   16.70    3.05
  -2  -2   6    8.02    1.83
   2  -2  -6    9.13    3.10
   2  -2  -6    1.61    1.81
   2   2  -5 1178.26   22.46
  -2   2   5 1059.16   20.43
   2   2  -5 1108.74   21.17
  -2   2   5  920.62   17.82
  -2  -2   5 1157.41   22.14
   2  -2  -5 1025.69   19.84
  -2  -2   5 1029.36   19.62
   2  -2  -5 1104.21   20.91
   2   2  -4  114.15    5.92
  -2   2   4  104.72    5.58
  -2   2   4  103.34    6.49
   2   2  -4   88.12    7.54
  -2  -2   4  124.81    6.76
  -2  -2   4  102.84    5.55
   2  -2  -4  115.25    6.48
   2  -2  -4  120.41    6.38
   2   2  -3  516.66    7.37
  -2   2   3  499.72    7.27
   2   2  -3  511.68    7.40
  -2   2   3  394.72    6.09
  -2  -2   3  505.71    7.48
   2  -2  -3  513.11    7.05
  -2  -2   3  452.32    6.93
   2  -2  -3  467.96    6.88
  -2   2   2 2086.87   23.19
   2   2  -2 1946.43   22.00
   2   2  -2 2167.76   24.27
  -2   2   2 1562.35   18.15
   2  -2  -2 1962.32   21.87
  -2  -2   2 2184.77   24.52
  -2  -2   2 1864.26   21.04
   2   2  -1  248.62    3.71
  -2   2   1  238.45    3.52
   2   2  -1  210.59    3.48
  -2   2   1  156.88    3.35
   2  -2  -1  255.09    3.74
  -2  -2   1  239.16    3.67
   2  -2  -1  180.25    3.32
  -2  -2   1  203.86    3.04
  -2   2   0    9.62    1.27
   2   2   0    5.43    0.98
  -2   2   0   16.65    3.03
   2   2   0    9.73    1.51
   2  -2   0    4.72    0.68
  -2  -2   0   10.33    1.62
   2  -2   0    7.72    1.88
  -2  -2   0    7.49    1.00
   2  -2   1 1583.18   17.55
   2   2   2  570.40    6.93
   2   2   2  513.37    7.13
  -2   2  -2  595.43    7.84
   2  -2   2  548.49    7.39
   2  -2   2  586.17    7.47
  -2  -2  -2  577.05    6.97
  -2  -2  -2  499.16    6.76
   2   2   3 1138.64   13.56
  -2   2  -3 1052.23   12.88
  -2   2  -3 1220.71   15.03
   2  -2   3 1118.85   14.64
  -2  -2  -3 1213.96   14.54
   2  -2   3 1177.61   14.05
  -2  -2  -3 1086.85   13.37
  -2   2  -4 1137.07   18.78
   2   2   4  999.90   18.01
  -2   2  -4  960.91   16.23
   2   2   4 1005.31   16.45
   2  -2   4 1042.84   19.22
   2  -2   4 1080.42   17.92
  -2  -2  -4 1085.95   19.06
  -2  -2  -4  925.56   16.06
  -2   2  -5  202.16   10.20
   2   2   5  173.13    9.11
  -2   2  -5  166.89    8.60
   2   2   5  165.19    8.31
   2  -2   5  173.96    9.15
   2  -2   5  182.25    9.20
  -2  -2  -5  187.96    9.49
  -2  -2  -5  164.41    9.29
  -2   2  -6   76.82    5.59
   2   2   6   92.60    6.98
  -2   2  -6   95.60    6.59
   2   2   6   84.81    8.48
   2  -2   6   88.62   10.62
  -2  -2  -6  103.48    6.97
   2  -2   6   83.00    6.47
  -2   2  -7  627.67   19.59
   2   2   7  592.02   18.89
   2  -2   7  571.09   18.42
  -2  -2  -7  626.62   19.40
  -2   2  -8  333.22   15.38
   2   2   8  285.17   13.26
   2  -2   8  305.15   13.56
  -2  -2  -8  328.65   13.65
   2   2   9  204.29   20.28
  -2   2  -9  228.45   22.43
   2  -2   9  226.02   22.54
  -2  -2  -9  225.34   22.92
   2   2  10   58.88    8.90
  -2   2 -10   50.96   12.13
  -2  -2 -10   56.39    8.07
   2  -2  10   54.70    9.50
   2   2  11   11.86    4.27
  -2   2 -11    4.22    3.38
  -2  -2 -11    8.74    4.62
   2  -2  11   19.59    7.20
   2   2  12   49.61   15.89
  -2   2 -12   45.28   13.17
   2  -2  12   71.25   13.45
  -2  -2 -12   47.77   14.38
  -2   4  12   19.47    6.57
   2   4 -12   17.44    5.62
   2  -4 -12   15.29    3.22
  -2  -4  12   23.24    6.61
  -2   4  11   12.36    6.82
   2   4 -11   21.93    6.75
  -2  -4  11   19.13    6.96
   2  -4 -11   20.25    6.62
   2   4 -10  590.13   26.33
  -2   4  10  588.86   25.63
  -2  -4  10  576.10   25.01
   2  -4 -10  567.64   24.51
  -2   4   9  137.40   15.07
   2   4  -9  146.14   20.91
  -2  -4   9  132.14   18.72
   2  -4  -9  128.79   17.74
   2   4  -8    3.77    1.63
  -2   4   8    6.56    3.96
  -2  -4   8    3.40    4.28
   2  -4  -8    5.23    2.23
   2   4  -7  606.91   18.42
  -2   4   7  554.09   15.41
  -2  -4   7  551.27   17.44
   2  -4  -7  564.42   17.50
  -2   4   6 1153.70   28.62
   2   4  -6 1261.29   31.19
  -2   4   6  975.95   24.18
  -2  -4   6 1087.03   28.64
   2  -4  -6 1176.72   28.92
   2  -4  -6 1156.54   28.62
   2   4  -5   61.49   10.30
   2   4  -5   53.18    4.99
  -2   4   5   70.90    4.75
  -2   4   5   54.45    5.05
  -2  -4   5   51.04    3.64
  -2  -4   5   66.02    7.75
   2  -4  -5   65.55    7.55
   2  -4  -5   73.67    7.48
  -2   4   4  587.97   10.79
   2   4  -4  621.50   11.14
  -2   4   4  488.53    9.07
   2   4  -4  668.10   12.11
  -2  -4   4  596.46   10.79
   2  -4  -4  568.52   10.45
   2  -4  -4  640.66   11.28
   2   4  -3 1030.00   12.81
  -2   4   3 1003.17   12.37
  -2   4   3  810.97   10.46
   2   4  -3 1074.37   13.35
  -2  -4   3  972.62   12.13
   2  -4  -3  847.78   11.01
   2  -4  -3 1013.11   12.30
   2   4  -2  412.44    5.97
   2   4  -2  398.92    5.90
  -2   4   2  366.72    5.07
  -2   4   2  274.32    4.49
   2  -4  -2  377.66    5.17
  -2  -4   2  385.23    6.88
   2  -4  -2  270.33    4.74
  -2  -4   2  343.14    5.01
   2   4  -1  318.62    4.65
  -2   4   1  327.14    4.19
   2   4  -1  328.54    4.49
  -2  -4   1  328.80    4.99
   2  -4  -1  318.91    3.99
   2   4   0 1451.52   16.45
   2  -4   0 1527.21   16.36
  -2  -4   0 1504.30   17.52
  -2  -4   0 1766.62   19.05
   2   4   1 1601.95   18.53
  -2   4  -1 1234.79   13.70
  -2  -4  -1 1641.29   18.69
   2  -4   1 1323.22   14.66
   2  -4   1 1147.66   13.40
  -2   4  -2 3097.59   33.90
   2  -4   2 3305.06   36.18
  -2  -4  -2 3332.32   35.93
   2   4   3 1846.91   20.73
  -2   4  -3 1923.88   22.02
  -2   4  -3 2206.67   25.54
   2  -4   3 1990.02   22.86
  -2  -4  -3 2057.97   23.00
   2  -4   3 2164.01   24.70
  -2  -4  -3 1901.19   22.75
  -2   4  -4  290.19   14.02
  -2   4  -4  235.93   11.50
   2   4   4  246.98   12.72
   2   4   4  235.02   11.44
   2  -4   4  256.18   12.49
  -2  -4  -4  249.88   12.04
   2  -4   4  271.97   13.06
  -2  -4  -4  236.85   11.53
  -2   4  -5  206.40   10.41
  -2   4  -5  194.00   10.72
   2   4   5  186.88    9.69
   2   4   5  175.18    8.71
   2  -4   5  179.80    9.22
   2  -4   5  194.05    9.74
  -2  -4  -5  186.59    9.37
  -2  -4  -5  194.99   12.72
  -2   4  -6 2067.79   49.60
   2   4   6 1700.01   41.46
   2   4   6 1716.14   41.08
   2  -4   6 1953.66   47.14
   2  -4   6 1766.24   42.42
  -2  -4  -6 1981.55   47.33
   2   4   7  225.82   14.91
   2   4   7  279.49   19.49
  -2   4  -7  311.17   21.43
  -2  -4  -7  290.20   19.12
   2  -4   7  287.44   19.36
   2   4   8  101.68   12.91
  -2   4  -8   92.50   11.97
   2  -4   8   88.98    9.68
  -2  -4  -8   95.99   13.83
   2   4   9  436.14   25.73
  -2   4  -9  481.74   24.62
   2  -4   9  464.58   23.99
  -2  -4  -9  461.98   23.44
  -2   4 -10   37.13   12.74
   2   4  10   23.95    6.75
   2  -4  10   41.54    7.61
  -2  -4 -10   30.82   11.39
   2   4  11   28.25    7.04
   2  -4  11   15.56    5.60
   2   4  12  292.85   19.96
  -2   4 -12  348.13   25.94
  -2  -4 -12  290.47   19.26
   2  -4  12  258.10   19.79
  -2   6  12    9.22    4.19
   2   6 -12    7.54    6.19
  -2  -6  12   14.72    4.50
   2  -6 -12    5.34    3.49
  -2   6  11  519.25   28.70
   2   6 -11  521.31   28.32
  -2  -6  11  538.10   29.43
   2  -6 -11  529.32   28.89
  -2   6  10   21.60    6.28
   2   6 -10   29.32    6.92
  -2  -6  10   12.33    5.21
   2  -6 -10   16.43    5.02
  -2   6   9  120.99   21.37
   2   6  -9  140.84   18.51
  -2  -6   9  139.40   20.07
   2  -6  -9  128.98   13.26
   2   6  -8   94.06   16.52
  -2   6   8   75.54   10.47
  -2  -6   8   74.00   10.13
   2  -6  -8   84.85   14.82
   2   6  -7   87.79   10.01
  -2   6   7   81.45    9.22
  -2  -6   7   98.29   13.55
   2  -6  -7   67.26    5.60
  -2   6   6   38.59    6.55
   2   6  -6   38.99    5.63
  -2   6   6   24.46    4.44
  -2  -6   6   45.15    8.12
   2  -6  -6   27.57    5.29
   2  -6  -6   38.19    3.83
   2   6  -5 1700.77   31.58
  -2   6   5 1548.94   28.77
   2   6  -5 1496.23   27.82
  -2   6   5 1212.07   22.83
  -2  -6   5 1724.12   32.06
   2  -6  -5 1478.00   27.64
  -2  -6   5 1404.70   26.19
   2  -6  -5 1491.68   27.67
   2   6  -4  792.91   13.91
   2   6  -4  737.28   12.90
  -2   6   4  698.64   12.35
  -2   6   4  560.51   10.47
  -2  -6   4  814.16   14.29
  -2  -6   4  717.29   12.64
   2  -6  -4  640.02   11.61
   2  -6  -4  716.40   12.43
   2   6  -3   69.35    5.04
   2   6  -3   77.68    4.96
  -2   6   3   63.27    4.10
  -2   6   3   49.63    3.41
  -2  -6   3   91.14    6.59
  -2  -6   3   82.77    5.35
   2  -6  -3   62.31    6.18
   2  -6  -3   74.91    5.67
   2   6  -2  449.27    6.42
   2   6  -2  458.21    6.51
  -2  -6   2  481.22    7.05
   2  -6  -2  405.17    5.53
  -2  -6   2  417.08    5.84
   2  -6  -2  309.81    5.25
  -2   6   1   65.91    3.83
   2   6  -1   74.10    4.71
   2   6  -1   81.46    5.68
  -2  -6   1   73.34    4.82
   2  -6  -1   90.61    5.57
   2  -6  -1   68.29    4.00
  -2  -6   1   72.73    4.36
   2   6   0 1546.87   17.70
   2   6   0 1984.99   21.53
   2  -6   0 1994.37   22.44
   2   6   1 2907.47   32.15
  -2   6  -1 2254.64   24.44
  -2  -6  -1 2997.80   33.23
   2  -6   1 1950.34   22.08
   2   6   2   13.66    2.97
   2   6   2   15.82    2.28
  -2   6  -2   12.82    2.14
   2   6   2    8.32    1.07
  -2   6  -2   15.16    2.93
   2  -6   2    8.70    1.75
  -2  -6  -2   10.24    1.33
   2  -6   2   10.63    2.19
   2   6   3  150.97    9.22
  -2   6  -3  165.38    8.13
   2   6   3  147.91    7.11
  -2   6  -3  192.57   11.86
   2  -6   3  180.89    8.96
   2  -6   3  179.17   10.44
  -2  -6  -3  171.73    8.23
  -2  -6  -3  159.20    9.63
  -2   6  -4   32.16    5.29
   2   6   4   35.82    5.44
  -2   6  -4   29.89    4.94
   2   6   4   31.41    4.15
   2  -6   4   37.03    5.45
   2  -6   4   30.65    4.87
  -2  -6  -4   30.75    4.17
  -2  -6  -4   25.65    3.99
  -2   6  -5  782.68   17.78
   2   6   5  670.26   13.50
  -2   6  -5  652.01   12.55
   2   6   5  619.04   11.55
   2  -6   5  694.89   13.70
  -2  -6  -5  714.80   13.29
   2  -6   5  735.84   14.03
  -2  -6  -5  685.67   13.41
   2   6   6  321.36    9.98
  -2   6  -6  302.24    9.05
  -2   6  -6  356.72   10.54
   2   6   6  281.49    8.03
   2  -6   6  335.01    9.97
  -2  -6  -6  337.62   10.44
   2   6   7  402.62   13.25
   2   6   7  459.35   15.19
  -2   6  -7  553.49   17.76
  -2  -6  -7  506.41   15.90
   2  -6   7  511.70   16.78
  -2   6  -8   21.28    5.57
   2   6   8   16.77    4.02
   2  -6   8    6.09    3.76
  -2  -6  -8   11.80    2.78
  -2   6  -9   13.56    6.60
   2   6   9    2.31    3.58
   2  -6   9    8.81    3.81
  -2  -6  -9    9.05    4.61
  -2   6 -10   49.52   10.82
   2   6  10   51.66    6.34
   2  -6  10   72.28    7.42
  -2  -6 -10   41.89   10.45
   2   6  11  356.78   24.61
  -2   6 -11  401.75   26.78
   2  -6  11  330.65   29.29
  -2  -6 -11  379.05   24.90
  -2   6 -12  101.42   19.94
   2   6  12   99.89    9.87
   2  -6  12   70.34   26.00
  -2  -6 -12  119.25   15.58
   2   8 -12    0.94    2.82
  -2   8  12    6.80    2.84
  -2  -8  12    3.11    3.09
   2  -8 -12    1.98    4.15
   2   8 -11  191.26   29.66
  -2   8  11  160.77   29.88
  -2  -8  11  143.23   27.42
   2  -8 -11  157.19   29.89
  -2   8  10   12.40    4.19
   2   8 -10    7.30    3.42
  -2  -8  10   10.06    4.27
   2  -8 -10   10.93    4.82
   2   8  -9  212.74   23.02
  -2   8   9  191.27   16.01
  -2  -8   9  220.06   15.89
   2  -8  -9  182.50   18.21
   2   8  -8  100.54   18.67
  -2   8   8   83.26   15.19
  -2  -8   8   96.80   18.16
   2  -8  -8   75.64   13.24
   2   8  -7   62.58   10.30
  -2   8   7   74.16    7.93
  -2  -8   7   74.76    6.95
   2  -8  -7   64.89    7.28
  -2   8   6   11.87    3.90
   2   8  -6    9.28    2.72
  -2   8   6    5.24    2.67
  -2  -8   6    6.70    3.05
   2  -8  -6    4.37    1.80
   2  -8  -6    5.57    1.62
   2   8  -5  860.32   17.55
  -2   8   5  755.55   14.46
   2   8  -5  799.79   15.12
  -2   8   5  563.62   11.19
  -2  -8   5  888.66   17.01
   2  -8  -5  701.78   13.76
  -2  -8   5  738.41   15.42
   2  -8  -5  735.41   13.93
   2   8  -4    0.52    1.38
   2   8  -4   -1.38    1.78
  -2   8   4    4.81    2.15
  -2   8   4   -0.31    0.61
  -2  -8   4    5.88    2.67
  -2  -8   4    1.33    1.29
   2  -8  -4    3.19    1.38
   2  -8  -4   -1.35    1.40
   2   8  -3  618.90   12.93
   2   8  -3  541.43    9.86
  -2   8   3  512.14    9.12
  -2   8   3  366.80    7.12
  -2  -8   3  594.14   10.99
  -2  -8   3  517.68    9.49
   2  -8  -3  406.67    8.01
   2  -8  -3  532.74    9.33
   2   8  -2  469.17    6.67
   2   8  -2  422.52    6.36
  -2   8   2  364.83    5.10
   2  -8  -2  426.16    6.00
  -2  -8   2  498.99    7.47
  -2  -8   2  406.82    5.94
   2  -8  -2  285.71    5.09
  -2   8   1   37.79    2.66
   2   8  -1   37.63    4.78
   2   8  -1   45.45    4.02
  -2  -8   1   54.13    7.58
   2  -8  -1   52.35    6.72
   2  -8  -1   47.52    3.95
  -2  -8   1   43.27    3.89
  -2   8   0  111.00    7.52
   2   8   0  106.20    7.91
  -2   8   0  128.66    7.18
   2   8   0  122.78    7.05
  -2  -8   0  106.02    6.53
   2  -8   0  114.89    6.47
   2  -8   0  100.38    6.11
  -2  -8   0  119.95    6.92
   2  -8   1 1743.77   20.13
   2   8   2  209.32   12.65
   2   8   2  133.87    8.13
  -2   8  -2  149.97    8.66
  -2   8  -2  131.17    7.98
   2  -8   2  161.26    9.35
   2  -8   2  153.16    9.06
  -2  -8  -2  137.22    6.56
  -2   8  -3 3231.56   50.46
  -2   8  -3 2762.22   42.85
   2   8   3 2697.20   42.44
   2   8   3 2131.16   32.92
   2  -8   3 3054.90   47.34
   2  -8   3 3101.97   48.35
  -2  -8  -3 2693.45   41.45
  -2  -8  -3 2832.05   44.30
  -2   8  -4  262.28   12.23
   2   8   4  232.73   12.43
  -2   8  -4  227.78   11.58
   2   8   4  175.37    8.60
   2  -8   4  230.15   11.39
   2  -8   4  246.06   12.29
  -2  -8  -4  222.16   10.73
  -2  -8  -4  232.47   11.92
  -2   8  -5   62.73    5.37
  -2   8  -5   58.73    6.68
   2   8   5   64.34    5.24
   2   8   5   47.35    6.37
   2  -8   5   76.92    8.86
  -2  -8  -5   63.85    6.40
   2  -8   5   51.04    8.99
  -2  -8  -5   55.05    7.45
  -2   8  -6    7.24    2.42
   2   8   6   12.29    4.44
  -2   8  -6   11.39    3.05
   2   8   6    8.75    1.76
   2  -8   6    8.28    2.39
  -2  -8  -6    9.62    2.71
   2   8   7  399.24    8.27
   2   8   7  464.84   10.76
  -2   8  -7  552.07   11.71
  -2  -8  -7  509.95   10.27
   2  -8   7  514.82   11.65
  -2   8  -8   14.52    4.65
   2   8   8   12.64    5.82
   2  -8   8   23.60    6.84
  -2  -8  -8    7.12    2.38
  -2   8  -9  186.44   13.17
   2   8   9  154.07   11.75
   2  -8   9  174.68   22.24
  -2  -8  -9  174.93   12.18
   2   8  10   57.46   15.12
  -2   8 -10   66.61   17.89
   2  -8  10   50.84   15.63
  -2  -8 -10   75.66   10.86
  -2   8 -11    5.02    4.18
   2   8  11    6.98    4.17
   2  -8  11   12.34    4.91
  -2  -8 -11    0.73    3.28
   2  10 -12    4.26    5.02
  -2  10  12    9.30    4.54
  -2 -10  12    8.51    4.06
   2 -10 -12    9.30    3.99
   2  10 -11  104.04   20.97
  -2  10  11   77.57   21.20
  -2 -10  11   50.19   25.53
   2 -10 -11   96.13   20.16
   2  10 -10    6.87    3.03
  -2  10  10    4.06    3.38
  -2 -10  10    7.64    5.78
   2 -10 -10    9.02    3.67
   2  10  -9  499.55   25.66
  -2  10   9  454.46   23.64
  -2 -10   9  517.81   26.75
   2 -10  -9  447.36   24.24
   2  10  -8  875.03   34.16
  -2  10   8  760.60   29.72
  -2 -10   8  981.62   38.10
   2 -10  -8  806.51   31.27
   2  10  -7  539.02   11.82
  -2  10   7  473.83   10.47
  -2 -10   7  547.43   12.64
   2 -10  -7  450.11   10.80
  -2  10   6   35.78    5.11
   2  10  -6   34.62    4.62
  -2  10   6   15.87    3.72
  -2 -10   6   33.02    4.52
   2 -10  -6   15.78    2.48
   2 -10  -6   28.86    3.49
   2  10  -5  326.84   15.29
  -2  10   5  278.94   12.66
   2  10  -5  280.62   12.70
  -2  10   5  206.49    9.78
  -2 -10   5  330.37   17.49
  -2 -10   5  262.48   11.91
   2 -10  -5  246.62   12.13
   2 -10  -5  297.84   18.21
   2  10  -4   81.25    4.83
   2  10  -4  104.26    7.38
  -2  10   4   92.69    8.75
  -2  10   4   58.49    5.81
  -2 -10   4  109.92    9.60
  -2 -10   4   91.39    9.99
   2 -10  -4   64.38    7.42
   2 -10  -4   85.41    6.14
   2  10  -3  456.45    8.94
   2  10  -3  382.29   18.18
  -2  10   3  356.31   17.20
   2 -10  -3  385.75   18.14
  -2 -10   3  412.59   19.81
  -2 -10   3  373.30   17.63
   2 -10  -3  302.00   15.01
   2  10  -2 1036.09   12.94
   2  10  -2  941.27   11.96
  -2  10   2  860.18   10.44
   2 -10  -2 1121.34   13.85
  -2 -10   2  978.08   12.72
  -2 -10   2  916.10   11.51
   2 -10  -2  564.39    8.68
   2  10  -1 1993.97   22.44
   2 -10  -1 2084.75   23.86
  -2 -10   1 1726.12   20.24
  -2  10   0  302.71    5.37
   2  10   0  341.64    4.73
  -2 -10   0  342.62    7.18
   2 -10   0  300.72    5.02
  -2 -10   0  368.30    4.96
   2  10   1  157.55    9.26
  -2  10  -1  177.70    2.82
  -2  10  -1  134.07    8.15
  -2 -10  -1  186.74   10.98
   2 -10   1  197.40    9.28
   2 -10   1  148.21    9.41
  -2 -10  -1  154.95    7.38
   2  10   2   56.52    4.71
  -2  10  -2   42.18    6.29
  -2  10  -2   53.56    3.44
   2  10   2   52.73    4.06
  -2 -10  -2   78.07    5.78
   2 -10   2   64.78    4.82
   2 -10   2   55.18    6.65
  -2 -10  -2   48.50    4.62
   2  10   3  854.77   15.26
   2  10   3  562.45   12.14
  -2  10  -3  595.75   10.32
  -2  10  -3  673.46   14.24
   2 -10   3  670.37   11.72
   2 -10   3  627.19   11.35
  -2 -10  -3  542.89    9.16
  -2  10  -4 2131.73   39.04
  -2  10  -4 1808.58   32.84
   2  10   4 1805.40   33.43
   2  10   4 1362.79   24.80
   2 -10   4 2042.46   37.06
   2 -10   4 1975.30   36.14
  -2 -10  -4 1831.13   33.04
  -2 -10  -4 1909.39   35.33
  -2  10  -5 1430.46   35.03
   2  10   5 1196.17   29.67
  -2  10  -5 1167.34   28.38
   2  10   5  981.02   23.79
  -2 -10  -5 1238.87   30.38
  -2 -10  -5 1218.16   29.32
   2 -10   5 1393.94   34.45
   2  10   6  299.15   16.31
   2  10   6  376.97   20.05
  -2  10  -6  461.84   53.30
  -2 -10  -6  407.34   20.97
   2 -10   6  435.54   50.05
   2  10   7  258.66   19.25
   2  10   7  319.93   38.08
  -2  10  -7  407.91   47.35
  -2 -10  -7  352.33   26.74
   2 -10   7  402.16    9.61
  -2  10  -8    2.02    1.69
   2  10   8   14.40    5.53
   2 -10   8    2.80    4.04
  -2 -10  -8    2.66    1.98
  -2  10  -9   86.69    8.68
   2  10   9   67.98   13.56
   2 -10   9   68.60   14.40
  -2 -10  -9   77.43    3.89
  -2  10 -10  268.40   28.16
   2  10  10  211.29   26.43
   2 -10  10  258.69   29.23
  -2 -10 -10  244.35   25.58
  -2  10 -11  187.80   30.76
   2  10  11  151.35   29.18
   2 -10  11  183.22   28.66
  -2 -10 -11  171.42   27.41
   2  12 -11   -2.50    4.91
  -2  12  11   -2.13    4.12
  -2 -12  11   15.71    6.05
   2 -12 -11    2.61    3.29
   2  12 -10    5.94    4.21
  -2  12  10    6.44    4.25
  -2 -12  10    8.17    6.41
   2 -12 -10    3.81    3.17
   2  12  -9  352.00   17.46
  -2  12   9  307.39   14.79
  -2 -12   9  409.40   18.73
   2 -12  -9  289.61   16.59
   2  12  -8   47.39    9.71
  -2  12   8   42.52    8.03
  -2 -12   8   37.84    9.63
   2 -12  -8   45.82   10.63
   2  12  -7  686.43   14.20
  -2  12   7  509.69   10.88
  -2 -12   7  662.66   15.89
   2 -12  -7  518.20   13.59
  -2  12   6   19.52    2.81
   2  12  -6   20.97    3.52
  -2 -12   6   25.67    4.31
   2 -12  -6   18.84    2.59
   2 -12  -6   14.30    2.70
   2  12  -5    3.64    1.82
  -2  12   5    2.31    1.99
   2  12  -5    5.65    1.85
  -2  12   5    2.02    1.36
  -2 -12   5    1.77    3.49
  -2 -12   5    2.77    1.62
   2 -12  -5    1.95    1.91
   2 -12  -5    2.61    1.15
   2  12  -4   14.15    2.42
   2  12  -4   22.07    2.97
  -2  12   4   20.25    3.41
   2 -12  -4   11.38    1.56
  -2 -12   4   11.07    3.56
  -2 -12   4   18.26    2.96
   2 -12  -4    5.65    1.71
   2  12  -3 3834.59   59.58
   2  12  -3 3270.21   51.05
  -2  12   3 2817.05   43.83
   2 -12  -3 3215.33   49.77
  -2 -12   3 3661.19   57.10
  -2 -12   3 3265.82   50.89
   2 -12  -3 2412.88   38.40
   2  12  -2   43.61    5.20
   2  12  -2   45.54    5.66
  -2  12   2   35.59    4.41
   2 -12  -2   28.59    2.45
   2 -12  -2   44.58    4.55
  -2 -12   2   51.60    6.47
  -2 -12   2   32.54    3.79
   2  12  -1 1640.90   25.95
   2  12  -1 1217.99   19.83
  -2  12   1 1286.30   20.22
   2 -12  -1 1623.67   25.97
  -2 -12   1 1403.82   23.30
  -2 -12   1 1431.25   22.81
  -2  12   0   43.32    6.10
  -2  12   0   40.58    3.51
   2  12   0   39.79    4.78
   2  12   0   36.02    4.17
  -2 -12   0   46.51    6.44
   2 -12   0   40.04    5.63
   2 -12   0   44.20    4.01
  -2 -12   0   44.02    4.53
   2  12   1   44.41    4.54
   2  12   1   52.73    3.95
  -2  12  -1   41.97    3.89
  -2  12  -1   43.18    3.64
  -2 -12  -1   42.05    5.26
   2 -12   1   42.79    5.88
   2 -12   1   54.63    4.77
  -2 -12  -1   48.96    4.28
   2  12   2  136.86    9.62
  -2  12  -2   97.97    5.67
  -2  12  -2   86.17    4.49
   2  12   2  100.81    9.98
  -2 -12  -2  118.75    7.25
   2 -12   2  107.87    5.59
   2 -12   2   90.57    6.65
  -2 -12  -2   77.82    5.92
   2  12   3 5889.08  245.84
   2  12   3 3922.31  164.02
  -2  12  -3 4274.66   75.41
  -2  12  -3 3858.07   69.15
   2 -12   3 5062.55  211.25
   2 -12   3 4452.53  186.05
  -2 -12  -3 3737.48  155.95
   2  12   4  463.21    9.82
   2  12   4  284.80   17.36
  -2  12  -4  302.22    6.67
   2  12   4  226.88    9.98
  -2  12  -4  347.59   15.68
   2 -12   4  368.60   11.86
  -2 -12  -4  296.18   13.08
   2 -12   4  330.46    8.29
  -2  12  -5  598.03   15.61
   2  12   5  586.83   15.87
  -2  12  -5  723.27   19.05
   2  12   5  447.82   11.51
   2 -12   5  672.38   17.43
  -2 -12  -5  587.26   15.34
   2  12   6    3.64    1.81
   2  12   6    3.00    2.47
  -2  12  -6    3.44    3.13
  -2 -12  -6    6.23    2.61
   2 -12   6    4.00    2.42
   2  12   7    5.36    2.15
   2  12   7    7.15    4.22
  -2  12  -7   18.32    3.75
  -2 -12  -7    8.05    2.91
   2 -12   7   12.85    3.57
  -2  12  -8   12.00    3.95
   2  12   8    5.41    2.56
   2 -12   8    4.93    1.93
  -2 -12  -8    2.33    2.24
  -2  12  -9  984.58   41.59
   2  12   9  770.40   32.30
   2 -12   9  983.11   40.57
  -2 -12  -9  872.08   35.73
  -2  12 -10   22.98    6.15
   2  12  10   11.19    4.22
   2 -12  10    6.92    4.55
  -2 -12 -10   20.89    5.56
  -2  12 -11  164.56   25.42
   2  12  11   91.77   14.76
   2 -12  11   61.84   25.24
  -2 -12 -11  104.60   16.44
   2  14 -11   53.92   14.79
  -2  14  11   33.15   12.34
  -2 -14  11   55.94   18.92
   2 -14 -11   33.41   11.60
   2  14 -10   11.82    5.96
  -2  14  10   31.14    6.34
  -2 -14  10   17.68    5.01
   2 -14 -10   19.32    8.92
   2  14  -9  100.36   12.56
  -2  14   9   85.14   10.66
  -2 -14   9   94.93   13.24
   2 -14  -9   68.87   12.62
   2  14  -8  555.02   24.62
  -2  14   8  420.56   19.55
  -2 -14   8  525.92   20.29
   2 -14  -8  409.28   18.45
   2  14  -7   39.81    7.22
  -2  14   7   34.23    6.46
  -2 -14   7   39.58    8.32
   2 -14  -7   23.64    4.17
   2  14  -6    4.53    1.79
  -2  14   6    4.59    2.03
  -2 -14   6    1.72    2.84
   2 -14  -6    3.34    1.66
  -2  14   5   98.27   12.41
   2  14  -5  102.89    9.57
  -2 -14   5   96.16   11.09
   2 -14  -5   59.95   10.28
   2 -14  -5   79.45   10.72
   2  14  -4    8.03    3.44
   2  14  -4    3.62    1.73
  -2  14   4    4.54    1.80
   2 -14  -4    2.02    1.40
  -2 -14   4   12.16    4.26
  -2 -14   4    4.22    1.73
   2 -14  -4    7.29    2.24
  -2  14   3   84.08    5.59
   2  14  -3  100.08   10.59
   2  14  -3   95.95    5.59
  -2 -14   3  124.75   12.53
   2 -14  -3  113.08    9.15
   2 -14  -3   91.63    7.12
  -2 -14   3   96.29    9.42
   2 -14  -3   82.15    9.54
  -2  14   2 2219.53   34.41
   2  14  -2 1924.60   30.68
   2  14  -2 1512.75   24.52
  -2  14   2 1457.86   23.10
   2 -14  -2 2100.00   34.08
  -2 -14   2 1761.08   28.42
  -2 -14   2 1643.02   26.52
  -2  14   1  261.18   12.80
  -2  14   1  234.44   10.97
   2  14  -1  228.21   11.11
  -2  14   1  217.62   10.30
   2  14  -1  293.25   14.12
   2 -14  -1  283.23   17.16
  -2 -14   1  232.50   11.64
  -2 -14   1  250.79   11.94
  -2  14   0  396.42   18.96
   2  14   0  394.70    7.24
   2  14   0  411.00    7.94
  -2  14   0  375.08   17.45
   2 -14   0  408.31   18.87
  -2 -14   0  463.69    9.93
   2 -14   0  368.27   18.00
  -2 -14   0  380.62   17.96
   2  14   1   16.22    2.15
   2  14   1   14.22    1.80
  -2  14  -1   20.75    2.38
  -2  14  -1   15.07    2.97
   2 -14   1   17.89    2.04
  -2 -14  -1   19.06    2.40
  -2 -14  -1   16.74    1.91
   2 -14   1    9.84    1.75
   2  14   2  686.39   14.13
   2  14   2  425.03    9.48
  -2  14  -2  545.21   10.45
  -2  14  -2  508.49   14.57
   2 -14   2  652.79   12.45
  -2 -14  -2  542.96   10.31
   2 -14   2  452.79   10.55
  -2 -14  -2  361.03    7.23
   2  14   3  271.70   13.32
  -2  14  -3  217.81   11.14
  -2  14  -3  195.03    9.58
   2  14   3  171.55    9.50
  -2 -14  -3  271.85   14.36
   2 -14   3  209.49   10.45
   2 -14   3  195.15    9.82
  -2 -14  -3  168.17    8.75
   2  14   4 1645.14   39.61
   2  14   4 1094.51   27.86
  -2  14  -4 1134.58   27.47
  -2  14  -4 1178.67   29.40
   2 -14   4 1374.07   33.18
  -2 -14  -4 1090.70   26.55
   2  14   5    4.67    2.95
  -2  14  -5   -0.14    1.50
  -2  14  -5    4.38    1.89
   2 -14   5    1.33    1.44
  -2 -14  -5    1.42    0.65
   2  14   6  207.09   15.57
   2  14   6  267.95   20.30
  -2  14  -6  354.17   26.61
  -2 -14  -6  292.30   21.61
   2 -14   6  349.17   25.92
   2  14   7   16.67    3.40
   2  14   7   41.73    7.73
  -2  14  -7   39.22    6.74
  -2 -14  -7   23.28    4.00
   2 -14   7   37.02    7.30
  -2  14  -8  178.19   18.14
   2  14   8  129.97   22.24
   2 -14   8  142.29   20.50
  -2 -14  -8  117.40   18.45
  -2  14  -9  177.30   23.65
   2  14   9  125.41   13.22
   2 -14   9  129.64   25.94
  -2 -14  -9  149.71   19.37
  -2  14 -10  376.03   23.31
   2  14  10  270.83   20.44
   2 -14  10  366.99   20.87
  -2 -14 -10  304.61   16.82
  -2  14 -11    6.21    2.72
   2  14  11   -1.88    4.12
   2 -14  11    3.81    4.42
  -2 -14 -11    1.01    3.25
   2  16 -11  132.94   38.75
  -2  16  11  124.74   31.11
  -2 -16  11  191.76   15.79
   2 -16 -11  144.68   16.07
   2  16 -10    6.02    4.25
  -2  16  10   -0.54    3.67
  -2 -16  10    9.06    6.06
   2 -16 -10    3.60    2.61
   2  16  -9   60.04   11.39
  -2  16   9   50.46   10.78
  -2 -16   9   66.07   10.27
   2 -16  -9   56.04    7.66
   2  16  -8  375.98   27.89
  -2  16   8  296.47   22.30
  -2 -16   8  368.00   24.81
   2 -16  -8  296.49   19.73
   2  16  -7   25.93    7.64
  -2  16   7   16.21    4.31
  -2 -16   7   19.96    6.64
   2 -16  -7   16.62    4.26
   2  16  -6    7.46    3.19
  -2  16   6    3.42    1.57
  -2 -16   6    5.79    3.40
   2 -16  -6    3.56    1.71
  -2  16   5  713.90   18.93
   2  16  -5  945.14   24.50
  -2 -16   5  929.96   24.18
   2 -16  -5  760.00   19.51
   2 -16  -5  604.13   21.34
   2  16  -4    2.26    1.73
   2  16  -4    0.88    1.56
  -2  16   4    2.43    1.62
   2 -16  -4    5.90    1.92
  -2 -16   4    3.69    1.68
  -2 -16   4    1.60    1.96
   2 -16  -4   -0.18    2.27
  -2  16   3  223.52    9.99
   2  16  -3  193.12    9.37
   2  16  -3  164.40   12.36
  -2  16   3  148.02    7.27
   2 -16  -3  224.73   16.52
  -2 -16   3  170.92    8.54
  -2 -16   3  142.32   14.72
   2 -16  -3  145.75   14.21
  -2  16   2  706.39   13.28
   2  16  -2  645.16   13.09
   2  16  -2  485.77   10.34
  -2  16   2  466.01    9.33
   2 -16  -2  645.06   13.00
  -2 -16   2  608.21   12.83
  -2 -16   2  551.57   11.16
  -2  16   1    3.28    1.75
  -2  16   1    0.70    0.71
   2  16  -1    3.11    1.91
  -2  16   1    3.46    1.21
   2  16  -1    2.75    1.49
  -2 -16   1    1.42    2.46
   2 -16  -1    3.40    1.46
  -2 -16   1   -0.56    1.50
  -2  16   0  166.08   11.87
   2  16   0  158.33    7.93
   2  16   0  183.13   12.36
  -2  16   0  152.69    7.76
   2 -16   0  178.89    9.93
  -2 -16   0  177.11    9.58
   2 -16   0  147.82    7.66
  -2 -16   0  131.09    6.65
  -2  16  -1  403.79    9.23
   2  16   1  356.86    7.90
  -2  16  -1  378.04    7.46
   2 -16   1  377.51    7.56
  -2 -16  -1  397.53    8.88
   2 -16   1  397.88    9.18
  -2 -16  -1  390.96    8.39
   2  16   2  119.78   10.47
  -2  16  -2   85.10    5.73
  -2  16  -2  104.37    6.92
   2  16   2   61.18    4.32
  -2 -16  -2   96.29    6.31
   2 -16   2  119.56    8.49
   2 -16   2   75.37    5.69
  -2 -16  -2   67.84    6.12
   2  16   3   37.20    3.09
  -2  16  -3   38.10    4.79
  -2  16  -3   27.30    2.14
   2  16   3   34.87    4.26
  -2 -16  -3   37.21    3.53
   2 -16   3   36.92    4.97
   2 -16   3   22.67    2.57
  -2 -16  -3   21.33    1.92
   2  16   4  133.87   10.39
  -2  16  -4  155.50   14.94
  -2  16  -4  117.10    9.28
   2  16   4   99.76    8.62
  -2 -16  -4  138.11   10.41
   2 -16   4  117.48    8.27
  -2 -16  -4   99.68    8.24
   2  16   5  208.74   14.46
  -2  16  -5  221.33   19.37
  -2  16  -5  264.12   17.83
   2 -16   5  291.07   19.31
  -2 -16  -5  203.16   13.36
  -2  16  -6  116.28    9.99
   2  16   6  104.81   11.48
   2 -16   6  110.19   13.77
  -2 -16  -6  107.69   11.38
   2  16   7  205.79   16.41
   2  16   7  334.22   75.43
  -2  16  -7  339.39   27.26
  -2 -16  -7  302.74   23.97
   2 -16   7  374.33   29.95
  -2  16  -8   99.23   17.59
   2  16   8   60.14    8.15
   2 -16   8   61.10   13.27
  -2 -16  -8   71.92   11.74
  -2  16  -9    4.06    3.00
   2  16   9   -2.97    3.62
   2 -16   9    0.30    3.20
  -2 -16  -9    3.15    2.58
  -2  16 -10   42.02   15.96
   2  16  10   49.60   11.11
   2 -16  10   40.62   10.16
  -2 -16 -10   27.11   11.19
  -2  16 -11   72.30   19.74
   2  16  11   49.32   17.74
   2 -16  11   37.31   21.92
  -2 -16 -11   77.12    8.98
   2  18 -11  156.24   20.42
  -2  18  11   68.45   22.06
  -2 -18  11   74.60   27.76
   2 -18 -11  120.37   16.05
   2  18 -10   21.28    7.16
  -2  18  10    9.80    3.82
  -2 -18  10   30.34   11.25
   2 -18 -10   12.42    4.09
   2  18  -9  155.87   27.13
  -2  18   9  130.46   19.30
  -2 -18   9  162.34   28.25
   2 -18  -9  136.58   17.69
   2  18  -8    4.57    1.66
  -2  18   8    5.67    3.86
  -2 -18   8   17.16    5.31
   2 -18  -8    9.14    4.18
   2  18  -7   89.97   12.37
  -2  18   7   77.72   16.91
  -2 -18   7   84.01   13.16
   2 -18  -7   66.88   16.20
   2  18  -6  192.32   24.65
  -2  18   6  123.54   16.66
  -2 -18   6  165.04   23.00
   2 -18  -6  122.81   14.74
  -2  18   5  898.99   27.56
   2  18  -5 1235.48   37.00
  -2 -18   5 1239.28   36.97
   2 -18  -5 1062.58   31.41
   2 -18  -5  785.73   23.98
  -2  18   4  271.99   16.87
   2  18  -4  274.09   14.80
   2  18  -4  198.28   11.11
  -2  18   4  212.61   11.56
   2 -18  -4  292.20   20.35
  -2 -18   4  270.75   14.79
   2 -18  -4  163.62   16.39
  -2  18   3   19.43    2.97
   2  18  -3   20.51    3.93
   2  18  -3   22.29    2.55
  -2  18   3   14.64    1.98
   2 -18  -3   11.72    2.22
  -2 -18   3   21.78    3.18
  -2 -18   3   18.65    2.91
   2 -18  -3   10.80    2.53
  -2  18   2    1.51    1.14
   2  18  -2    9.11    1.96
   2  18  -2    4.79    1.76
  -2  18   2    2.02    1.32
   2 -18  -2    3.49    1.53
  -2 -18   2    0.30    2.23
  -2 -18   2    5.35    1.34
  -2  18   1  309.00   14.44
  -2  18   1  344.40    7.00
   2  18  -1  355.23    7.82
  -2  18   1  222.84    9.78
   2  18  -1  313.24   14.44
   2 -18  -1  304.95   13.72
  -2 -18   1  358.11   10.02
  -2 -18   1  304.90   18.01
   2  18   0  303.09   13.47
  -2  18   0  313.04   14.54
   2  18   0  318.37    7.19
  -2  18   0  279.64   12.06
  -2 -18   0  348.70   15.74
   2 -18   0  343.28   15.00
   2 -18   0  302.63   13.70
  -2 -18   0  232.69   10.56
  -2  18  -1 2243.09   39.01
   2  18   1 1940.58   33.52
  -2  18  -1 1970.13   33.12
   2 -18   1 2129.52   35.83
  -2 -18  -1 2252.75   38.77
   2 -18   1 2101.34   36.33
  -2 -18  -1 2092.53   35.29
   2  18   2   69.26    8.32
   2  18   2   40.35    4.01
  -2  18  -2   77.23    6.96
  -2  18  -2   73.48    9.77
   2 -18   2   78.59    8.45
  -2 -18  -2   67.09    5.95
   2 -18   2   67.02    5.42
   2  18   3    6.87    2.40
  -2  18  -3   10.27    3.81
  -2  18  -3    6.79    1.89
   2  18   3    3.92    2.31
  -2 -18  -3    2.52    1.28
   2 -18   3    3.45    1.56
  -2 -18  -3    2.47    1.52
  -2  18  -4   -0.85    3.08
  -2  18  -4   -0.67    1.43
   2  18   4   -0.21    1.26
  -2 -18  -4    4.24    1.28
   2 -18   4    2.03    1.76
  -2 -18  -4    0.37    0.61
  -2  18  -5  596.77   13.15
  -2  18  -5  432.24    8.62
   2  18   5  455.10   19.46
  -2 -18  -5  656.43   11.62
   2 -18   5  562.14   11.41
  -2 -18  -5  447.03    8.76
  -2  18  -6  271.61   20.22
   2  18   6  254.51   17.76
   2 -18   6  255.78   25.81
  -2 -18  -6  186.53   22.54
  -2  18  -7  164.61   18.26
   2  18   7  108.02   13.64
   2 -18   7  139.10   14.42
  -2 -18  -7  125.02   12.44
   2  18   8   17.91    5.82
   2 -18   8    9.16    3.34
  -2 -18  -8   10.16    2.97
  -2  18  -9    8.14    4.25
   2  18   9    3.59    2.51
   2 -18   9    4.88    3.51
  -2 -18  -9   -2.81    2.14
  -2  18 -10    8.97    3.68
   2  18  10   -0.71    4.46
   2 -18  10    1.46    3.48
  -2 -18 -10    4.60    2.94
   2  20 -10  468.15   40.32
  -2  20  10  302.54   28.66
  -2 -20  10  465.76   40.15
   2 -20 -10  349.61   29.62
   2  20  -9   13.42    5.43
  -2  20   9    4.03    3.22
  -2 -20   9    7.22    4.25
   2 -20  -9   12.61    3.98
   2  20  -8    1.99    3.49
  -2  20   8    3.26    2.65
  -2 -20   8    0.01    2.51
   2 -20  -8    4.58    2.76
   2  20  -7    8.80    2.98
  -2  20   7   12.41    3.64
  -2 -20   7   13.63    5.26
   2 -20  -7    5.16    2.29
   2  20  -6 1063.18   40.96
  -2  20   6  690.74   26.79
  -2 -20   6 1021.80   39.45
   2 -20  -6  657.46   25.69
  -2  20   5   45.88   11.51
   2  20  -5   80.60   16.06
  -2  20   5   54.82    9.66
  -2 -20   5   71.34   13.20
   2 -20  -5   36.38    6.83
  -2  20   4  516.77   15.75
   2  20  -4  438.73   14.45
  -2  20   4  325.04   15.43
  -2 -20   4  406.98   61.40
   2 -20  -4  251.18   11.92
  -2  20   3    1.93    0.73
   2  20  -3    2.58    2.40
   2  20  -3    4.61    1.64
  -2  20   3    3.23    1.86
   2 -20  -3    0.79    1.54
  -2 -20   3   -1.74    1.81
  -2 -20   3    1.91    1.79
   2 -20  -3    1.49    1.97
  -2  20   2   34.06    2.92
   2  20  -2   48.60    8.90
   2  20  -2   37.61    4.14
  -2  20   2   31.89    3.80
   2 -20  -2   44.99    5.75
  -2 -20   2   46.94    5.74
  -2 -20   2   22.87    3.33
  -2  20   1    4.46    1.33
   2  20  -1    2.29    1.68
  -2  20   1    2.70    1.06
  -2  20   1    0.87    0.73
   2  20  -1    6.07    2.37
   2 -20  -1    4.64    1.62
  -2 -20   1    2.47    2.24
  -2 -20   1    5.05    2.23
   2  20   0 3230.62   75.97
  -2  20   0 3313.62  230.54
   2  20   0 3125.29  217.37
  -2  20   0 2991.71  207.89
  -2 -20   0 3492.18   82.54
   2 -20   0 3610.27   84.52
   2 -20   0 3023.27   71.67
  -2 -20   0 2672.94   63.01
  -2  20  -1  198.42   14.14
   2  20   1  161.94   11.03
   2  20   1  175.86   13.97
  -2  20  -1  141.38    8.54
  -2 -20  -1  191.76   14.59
   2 -20   1  180.67   12.92
  -2 -20  -1  161.27   12.12
   2 -20   1  159.88   16.84
   2  20   2  437.07   51.36
  -2  20  -2  455.28   13.06
  -2  20  -2  438.33   11.29
   2  20   2  339.99   38.83
  -2 -20  -2  470.95   12.14
   2 -20   2  471.33   53.44
  -2  20  -3    4.53    1.62
  -2  20  -3    2.01    1.43
   2  20   3    2.76    2.09
  -2 -20  -3    1.78    1.10
   2 -20   3    0.35    1.22
  -2 -20  -3    1.73    1.08
   2  20   4    6.93    3.20
  -2  20  -4    5.06    1.63
  -2  20  -4    8.01    2.80
   2 -20   4    1.10    1.40
  -2 -20  -4    3.72    2.07
  -2  20  -5    2.12    1.33
  -2  20  -5    1.30    0.92
   2  20   5    4.98    2.75
  -2 -20  -5    0.52    0.98
   2 -20   5   -1.54    2.05
  -2 -20  -5    4.13    1.54
   2  20   6 1284.78   48.89
  -2  20  -6 2005.36  437.79
   2 -20   6 2003.82  437.36
  -2 -20  -6 2084.65   77.35
  -2 -20  -6 1548.05  337.86
  -2  20  -7   92.64   15.12
   2  20   7   62.71    6.98
   2 -20   7   70.88   12.33
  -2 -20  -7   64.03   10.31
  -2  20  -8  101.08   15.20
   2  20   8   81.62   16.51
   2 -20   8   90.03   18.85
  -2 -20  -8   74.91   10.18
  -2  20  -9   24.13    6.94
   2  20   9   14.76    4.58
   2 -20   9   21.44    6.01
  -2 -20  -9    9.94    3.93
  -2  20 -10   10.08    5.26
   2  20  10   16.07    3.96
   2 -20  10   10.31    2.44
   2  22 -10    4.26    4.45
  -2  22  10    6.26    3.76
  -2 -22  10    1.76    3.00
   2 -22 -10    2.83    2.14
   2  22  -9    6.13    4.96
  -2  22   9    8.35    3.08
  -2 -22   9   -2.86    3.88
   2 -22  -9    6.16    3.23
   2  22  -8   58.08    9.23
  -2  22   8   26.44    7.11
  -2 -22   8   43.61    9.93
   2 -22  -8   27.28    9.36
   2  22  -7    9.63    4.12
  -2  22   7    4.43    2.44
  -2 -22   7    9.84    5.30
   2 -22  -7    9.02    2.93
   2  22  -6  132.02   16.62
  -2  22   6   88.14   11.53
  -2 -22   6  115.61   16.21
   2 -22  -6   67.43   18.03
  -2  22   5  854.66   32.28
   2  22  -5  807.52   31.47
  -2  22   5  485.00   19.40
  -2 -22   5  768.66   31.28
   2 -22  -5  474.00   19.09
  -2  22   4  228.33   19.42
   2  22  -4  222.44   21.05
  -2  22   4  154.90   15.86
  -2 -22   4  205.22   15.87
   2 -22  -4  116.07   14.16
  -2  22   3  513.42   15.59
   2  22  -3  492.82   15.90
  -2  22   3  324.26   13.86
  -2 -22   3  460.00   14.89
   2 -22  -3  225.31    8.35
   2  22  -2  219.59   14.83
  -2  22   2  205.90   13.42
   2  22  -2  206.42   17.51
  -2  22   2  129.92    8.81
  -2 -22   2  219.83   14.95
  -2 -22   2  165.79   14.01
  -2  22   1   -3.37    2.30
  -2  22   1   -0.34    0.90
   2  22  -1    2.31    1.70
  -2  22   1    3.66    1.28
   2  22  -1    7.30    2.87
  -2 -22   1    3.29    1.68
  -2 -22   1    3.09    2.15
   2  22   0  702.08   18.25
  -2  22   0  725.75   26.71
  -2  22   0  645.96   16.10
   2  22   0  660.45   17.20
   2 -22   0  772.04   19.81
  -2 -22   0  766.35   21.35
  -2 -22   0  571.39   14.74
  -2  22  -1 1419.69   35.53
   2  22   1 1316.22   32.26
   2  22   1 1216.80   30.21
  -2  22  -1 1115.66   27.15
  -2 -22  -1 1538.54   38.07
   2 -22   1 1512.85   36.67
  -2 -22  -1 1260.88   30.84
  -2  22  -2   47.07    7.33
   2  22   2   43.24    6.08
  -2  22  -2   31.74    4.90
   2  22   2   26.16    4.26
   2 -22   2   39.39    6.13
  -2 -22  -2   42.85    5.48
  -2  22  -3  189.08   16.56
  -2  22  -3  165.14   15.87
   2  22   3  163.91   17.42
  -2 -22  -3  167.88   15.57
   2 -22   3  241.84   19.31
  -2 -22  -3  134.13   10.37
  -2  22  -4  293.85   21.22
  -2  22  -4  239.59   12.97
   2  22   4  160.54   15.57
  -2 -22  -4  266.56   26.48
   2 -22   4  345.53   17.42
  -2 -22  -4  198.23    9.44
  -2  22  -5   35.11    7.76
  -2  22  -5   16.47    3.74
   2  22   5   22.28    5.76
  -2 -22  -5   20.34    5.17
   2 -22   5   22.30    5.44
  -2 -22  -5   24.35    6.19
   2  22   6  158.54   18.16
  -2  22  -6  292.84   19.77
   2 -22   6  296.26   19.47
  -2 -22  -6  290.16   18.83
  -2 -22  -6  190.63   18.34
  -2  22  -7  551.31   25.86
   2  22   7  340.19   18.11
   2 -22   7  536.02   22.82
  -2 -22  -7  423.32   17.90
  -2  22  -8   96.84   23.62
   2  22   8   74.37   13.99
   2 -22   8  106.97   18.53
  -2 -22  -8   68.67   14.11
  -2  22  -9   94.50   27.20
   2  22   9   70.36   18.36
   2 -22   9   82.41   26.23
  -2  22 -10   49.57   19.83
   2  22  10   45.46   11.96
   2 -22  10   53.06   13.02
   2  24 -10    9.10    3.25
  -2  24  10    8.66    4.89
  -2 -24  10   10.35    6.09
   2 -24 -10    4.52    3.60
   2  24  -9   29.32    7.54
  -2  24   9   13.71    5.38
  -2 -24   9   42.25    8.68
   2 -24  -9   16.85    5.76
   2  24  -8  181.66   30.30
  -2  24   8  136.26   16.39
  -2 -24   8  181.78   29.32
   2 -24  -8  107.76   20.62
   2  24  -7   94.69   17.10
  -2  24   7   44.20    8.07
  -2 -24   7   75.10   11.50
   2 -24  -7   56.82    9.22
   2  24  -6    9.98    4.03
  -2  24   6    5.13    2.38
  -2 -24   6   18.63    5.02
   2 -24  -6   21.66    3.93
   2  24  -5    2.97    2.00
  -2  24   5    1.52    1.54
  -2 -24   5    5.28    3.25
   2 -24  -5   -1.09    2.06
  -2  24   4   14.96    3.88
   2  24  -4    7.48    3.99
  -2  24   4   12.54    3.34
  -2 -24   4    9.93    4.44
   2 -24  -4    9.69    2.82
  -2  24   3   42.09    9.90
   2  24  -3   64.56   13.54
  -2  24   3   34.86    6.66
  -2 -24   3   80.80   10.97
   2 -24  -3   37.27    6.80
  -2  24   2  286.36   34.00
  -2  24   2  471.93    9.34
   2  24  -2  436.08    9.42
  -2 -24   2  491.77   10.71
  -2  24   1  300.92   26.02
   2  24  -1  253.77   16.77
  -2  24   1  263.49   18.22
  -2  24   1  179.04   11.79
   2  24  -1  261.55   19.16
  -2 -24   1  294.70   19.56
  -2 -24   1  208.74   14.52
   2  24   0  329.86   21.52
  -2  24   0  348.62   27.34
  -2  24   0  284.57   20.17
   2  24   0  274.51   18.29
  -2 -24   0  350.42   23.91
   2 -24   0  313.31   20.89
  -2 -24   0  240.19   19.88
   2  24   1   76.05   13.76
  -2  24  -1   66.44   13.02
  -2  24  -1   45.04    7.10
  -2 -24  -1   66.82   12.29
   2 -24   1   61.79   10.68
  -2 -24  -1   53.96    9.76
   2  24   2   10.64    3.51
  -2  24  -2    3.84    1.84
  -2  24  -2   12.67    3.29
   2 -24   2   12.43    3.14
  -2 -24  -2    7.19    1.93
  -2  24  -3  204.38   19.77
  -2  24  -3  167.46   17.28
   2  24   3  134.15   13.34
  -2 -24  -3  191.63   19.01
   2 -24   3  206.71   20.81
  -2 -24  -3  116.26   14.87
  -2  24  -4  450.03   20.70
  -2  24  -4  391.18   15.38
   2  24   4  311.29   69.48
  -2 -24  -4  416.04   16.21
   2 -24   4  565.65   22.12
  -2 -24  -4  305.88   13.76
   2  24   5    2.02    1.27
  -2  24  -5    4.80    3.59
   2 -24   5    4.00    1.45
  -2 -24  -5    0.83    1.00
  -2 -24  -5    2.61    1.24
  -2  24  -6  133.15   15.46
   2  24   6   77.43   11.12
   2 -24   6  143.75   13.14
  -2 -24  -6   63.92    9.86
  -2  24  -7   67.38    8.29
   2  24   7   36.77    8.21
   2 -24   7   54.78   11.45
  -2 -24  -7   36.95    7.76
  -2  24  -8   78.22   14.77
   2  24   8   51.14    9.94
   2 -24   8   60.80   12.10
  -2 -24  -8   40.35    6.83
  -2  24  -9   28.88   10.35
   2  24   9   20.28    6.45
   2 -24   9   23.76    5.42
   2  26  -9   84.54   15.76
  -2  26   9   55.64   10.98
  -2 -26   9   34.16   11.74
   2 -26  -9   28.30   11.35
   2  26  -8  456.22   30.32
  -2  26   8  245.01   19.26
  -2 -26   8  434.01   29.12
   2 -26  -8  294.38   19.87
   2  26  -7  131.96   19.04
  -2  26   7   56.63   11.46
  -2 -26   7   84.94   25.41
   2 -26  -7   70.01   15.35
   2  26  -6   40.35   11.06
  -2  26   6   26.97    6.61
  -2 -26   6   51.10    9.39
   2 -26  -6   32.70    4.86
   2  26  -5   -5.98    2.96
  -2  26   5    0.28    1.59
  -2 -26   5   -1.59    2.79
   2 -26  -5   -0.66    2.06
  -2  26   4  168.05   16.44
  -2  26   4  268.74   25.85
   2  26  -4  315.16   34.58
  -2 -26   4  272.84   26.59
   2 -26  -4  152.22   19.05
  -2  26   3  151.65   17.09
  -2  26   3  234.62   18.61
   2  26  -3  251.42   22.57
  -2 -26   3  214.18   23.27
   2 -26  -3  124.18   10.74
  -2  26   2  871.83   32.71
   2  26  -2  738.94   28.51
  -2  26   2  576.80   21.99
  -2 -26   2  897.30   34.44
  -2  26   1  148.73   16.55
  -2  26   1  185.59   19.08
   2  26  -1  193.54   21.99
  -2 -26   1  216.45   26.75
   2  26   0  265.22   25.00
  -2  26   0  329.88   22.86
  -2  26   0  224.46   22.31
  -2  26   0  185.48   19.72
   2 -26   0  252.10   24.20
  -2 -26   0  298.26   32.57
  -2 -26   0  184.58   20.70
  -2  26  -1   -0.24    0.78
  -2  26  -1    4.95    2.85
  -2 -26  -1    4.79    2.11
   2 -26   1    3.07    1.48
  -2 -26  -1   -3.11    1.38
   2  26   2  415.09   17.02
  -2  26  -2  412.75   15.91
  -2  26  -2  581.67   23.69
   2 -26   2  558.10   21.90
  -2 -26  -2  523.36   20.06
   2  26   3  510.87   21.91
  -2  26  -3  540.98   20.78
  -2  26  -3  676.40   26.97
   2 -26   3  654.98   25.43
  -2 -26  -3  667.25   25.53
  -2 -26  -3  381.20   17.03
   2  26   4  340.39   13.65
  -2  26  -4  353.61   13.16
  -2  26  -4  421.93   20.44
   2 -26   4  532.95   19.51
  -2 -26  -4  396.34   15.89
  -2 -26  -4  302.84   11.52
  -2  26  -5    6.28    3.78
   2  26   5   11.45    4.08
   2 -26   5   16.33    4.16
  -2 -26  -5    6.36    2.59
   2  26   6   11.85    4.33
  -2  26  -6   10.61    5.24
  -2 -26  -6   12.83    4.20
  -2  26  -7   12.40    4.56
   2  26   7    7.84    4.72
   2 -26   7   17.03    5.71
  -2 -26  -7    9.03    3.08
  -2  26  -8  315.83   29.08
   2  26   8   93.35   23.39
   2 -26   8  303.31   25.97
  -2  26  -9  192.43   23.11
   2  26   9   60.94   21.32
   2 -26   9  171.03   21.53
   2  28  -8    6.26    4.47
  -2  28   8    7.56    3.87
  -2 -28   8    3.18    2.35
   2 -28  -8    0.38    1.79
   2  28  -7  165.86   30.36
  -2  28   7   73.13   14.83
  -2 -28   7  173.52   26.08
   2 -28  -7   89.75   18.67
   2  28  -6  221.32   32.43
  -2  28   6   97.70   17.66
  -2 -28   6  205.94   29.15
   2 -28  -6   81.12   18.63
   2  28  -5    7.68    2.71
  -2  28   5    5.40    2.80
  -2 -28   5   11.37    5.11
   2 -28  -5    5.01    3.22
   2  28  -4  183.76   17.87
  -2  28   4  119.88    8.60
  -2 -28   4  149.24   21.15
   2 -28  -4   84.26   12.19
  -2  28   3  273.11   53.29
  -2  28   3  360.66   13.57
   2  28  -3  376.95   16.12
  -2 -28   3  413.64   16.05
   2 -28  -3  218.85   13.76
  -2  28   2  101.11   10.18
  -2  28   2  135.94   13.22
   2  28  -2  161.05   16.17
  -2 -28   2  139.83   22.19
  -2  28   1   92.75   16.55
  -2  28   1  150.27   12.07
   2  28  -1  161.40   16.70
  -2 -28   1  176.62   21.25
  -2  28   0  194.31   19.42
  -2  28   0  108.57   18.83
  -2  28   0  129.74   10.63
   2  28   0  188.35   19.36
  -2 -28   0  180.65   19.44
  -2  28  -1    9.51    2.68
  -2  28  -1    8.69    4.29
  -2 -28  -1    7.95    3.90
   2 -28   1   11.88    3.06
  -2 -28  -1    6.70    2.97
   2  28   2  182.87   18.33
  -2  28  -2  131.27   14.68
  -2  28  -2  242.92   25.92
   2 -28   2  229.33   22.07
  -2 -28  -2  169.53   18.04
   2  28   3  287.61   42.06
  -2  28  -3  260.95   17.14
  -2  28  -3  383.82   25.21
   2 -28   3  360.14   46.12
  -2 -28  -3  341.28   22.31
  -2 -28  -3  176.42   17.49
  -2  28  -4    4.12    3.07
   2  28   4    8.01    3.31
   2 -28   4    8.99    2.46
  -2 -28  -4    3.07    2.28
  -2  28  -5  128.86   23.57
   2  28   5   83.60   14.90
   2 -28   5  188.69   18.59
  -2 -28  -5   76.99   13.42
  -2  28  -6   96.56   13.86
   2  28   6   58.14   10.75
   2 -28   6   84.34   15.42
  -2 -28  -6   35.34   12.02
  -2  28  -7    1.84    4.13
   2  28   7    2.79    2.34
   2 -28   7    5.46    2.85
  -2  28  -8   35.70    5.73
   2 -28   8   21.67    4.22
   2  30  -8  110.18   28.98
  -2  30   8   67.75   13.24
  -2 -30   8   68.57   28.37
   2 -30  -8   48.20   16.34
   2  30  -7    9.25    4.92
  -2  30   7    2.42    1.90
  -2 -30   7   -2.11    3.08
   2 -30  -7    5.27    3.57
   2  30  -6   39.22    6.26
  -2  30   6   15.00    4.07
  -2 -30   6   36.72    6.51
   2 -30  -6   13.48    5.13
   2  30  -5  123.03   14.09
  -2  30   5   58.82   11.66
  -2 -30   5   96.93   17.41
   2 -30  -5   40.08    8.67
   2  30  -4   23.03    7.27
  -2  30   4   16.01    3.57
  -2 -30   4   37.39    5.03
   2 -30  -4   21.13    4.28
   2  30  -3    9.19    3.76
  -2  30   3    3.72    2.01
  -2 -30   3    8.52    3.96
   2 -30  -3    4.92    2.50
   2  30  -2  136.98   16.77
  -2  30   2   75.05   11.72
  -2 -30   2  136.82   18.17
   2  30  -1   15.12    4.78
  -2  30   1   10.58    2.95
  -2 -30   1   21.09    4.13
   2  30   0  296.31   27.49
  -2  30   0  207.96   13.60
  -2  30   0  297.89   25.04
  -2 -30   0  327.40   25.61
  -2  30  -1  234.02   21.27
   2  30   1  149.66   17.54
   2 -30   1  238.74   16.14
  -2  30  -2    4.67    3.80
   2  30   2    6.98    3.82
   2 -30   2    9.65    3.16
  -2  30  -3   12.41    5.63
   2  30   3    9.69    4.11
   2 -30   3    5.90    2.93
  -2 -30  -3    3.50    1.22
  -2  30  -4  153.25   15.99
   2  30   4  100.62   15.78
   2 -30   4   94.87   23.44
  -2 -30  -4   52.23   11.36
  -2  30  -5   45.64    7.05
   2  30   5   31.04    6.43
   2 -30   5   52.98    6.95
  -2 -30  -5   17.45    5.39
  -2  30  -6  215.86   25.48
   2  30   6  143.67   28.49
   2 -30   6  308.25   20.58
  -2  30  -7   78.01   17.06
   2  30   7   37.45   11.20
   2 -30   7   43.02   13.88
   2  32  -7    7.80    4.45
  -2 -32   7   -2.77    3.25
   2 -32  -7    4.41    3.68
   2  32  -6   14.63    4.95
  -2 -32   6    1.81    3.21
   2 -32  -6    2.15    2.68
   2  32  -5  295.38   16.91
  -2  32   5  241.54   14.99
  -2 -32   5  337.33   20.26
   2 -32  -5  150.86   24.29
   2  32  -4   17.43    5.76
  -2  32   4    4.18    3.27
  -2 -32   4    2.24    3.31
   2 -32  -4    3.23    2.72
   2  32  -3    9.08    3.09
  -2  32   3    1.28    0.97
  -2 -32   3    7.82    3.55
   2 -32  -3    2.21    2.87
   2  32  -2   16.21    5.00
  -2  32   2    7.36    2.46
  -2 -32   2   14.06    4.86
   2  32  -1  122.83   17.34
  -2  32   1   46.16    9.24
  -2 -32   1  110.03   15.37
  -2  32   0   82.66   10.03
  -2  32   0   28.64    4.34
   2  32   0   51.11    8.08
  -2 -32   0   49.24    7.75
  -2  32  -1  813.63   33.28
   2  32   1  579.37   24.27
   2 -32   1  825.87   32.87
  -2  32  -2   11.94    4.44
   2  32   2    8.11    4.34
   2 -32   2   10.36    3.05
  -2  32  -3  317.84   17.96
   2  32   3  206.35   27.26
   2 -32   3  248.78   28.62
  -2 -32  -3   71.42   16.19
  -2  32  -4   36.53   10.39
   2  32   4    6.43    3.03
   2 -32   4   14.95    3.44
  -2 -32  -4    2.75    1.84
  -2  32  -5  111.03   18.14
   2  32   5   56.73   12.24
   2 -32   5  107.07   17.00
  -2  32  -6   14.60    4.39
   2  32   6    4.89    3.57
   2 -32   6   12.23    3.40
   2  32   7  146.89   26.58
  -2  32  -7  212.32   27.76
   2  34  -6   11.91    5.67
  -2 -34   6   -0.91    2.76
   2 -34  -6    5.03    2.64
   2  34  -5  174.61   30.17
  -2 -34   5  223.76    7.71
   2 -34  -5  115.79   18.04
   2  34  -4    8.16    4.72
  -2 -34   4   12.43    4.73
   2 -34  -4    3.16    4.07
   2  34  -3   80.14   20.35
  -2 -34   3  125.67   28.37
   2 -34  -3   55.64    9.16
   2  34  -2  415.01   20.66
  -2 -34   2  416.01   22.64
   2  34  -1  224.87   29.78
  -2 -34   1  140.85   27.81
   2  34   0   82.77   15.57
  -2  34   0   91.14   19.65
  -2 -34   0   73.15   16.68
   2  34   1  133.48   18.26
  -2  34  -1  244.85   33.43
   2  34   2    9.54    4.77
  -2  34  -2   16.45    4.44
   2  34   3  159.82   21.79
  -2  34  -3  210.82   31.31
  -2 -34  -3   60.33   12.21
   2  34   4  327.35   25.02
  -2  34  -4  432.77   30.16
   2  34   5   77.24   20.19
  -2  34  -5  107.82   31.60
   2  34   6    4.52    3.14
  -2  34  -6   19.50    6.83
   2  36  -5   14.54    5.05
  -2 -36   5    4.27    3.95
   2 -36  -5    4.33    3.77
   2  36  -4   39.37   11.38
  -2 -36   4   43.31    9.88
   2 -36  -4   18.06    5.95
   2  36  -3   86.15   25.97
  -2 -36   3   79.71   23.25
   2 -36  -3   46.86   13.11
   2  36  -2    4.02    2.62
  -2 -36   2    4.78    3.66
   2  36  -1   14.41    4.40
  -2 -36   1    6.19    2.71
  -2 -36   0  166.52   36.25
   2  36   1    3.99    2.96
  -2  36  -1    8.30    2.59
   2  36   2   82.29   22.62
  -2  36  -2  283.00   25.66
   2  36   3  145.45   36.91
  -2  36  -3  365.05   31.20
   2  36   4   22.08    8.00
  -2  36  -4   46.20   12.69
   2  36   5    0.79    2.99
   2  38  -3   89.36   24.73
  -2 -38   3   69.79   23.95
   2 -38  -3   95.84    6.26
   2  38  -2   57.96   12.55
  -2 -38   2   38.96    5.96
   2  38  -1   28.18    5.66
  -2 -38   1   36.37    7.20
   2  38   0    3.51    2.14
   2  38   1   31.96    7.59
  -2  38  -1   64.47   17.08
   2  38   2   -1.32    2.88
  -2  38  -2    8.82    2.67
   2  38   3  157.94   11.90
  -2  38  -3  168.93   25.03
  -3   1  12   36.23    8.89
   3   1 -12   34.70    6.64
   3  -1 -12   70.17   14.12
  -3  -1  12   27.13   10.91
  -3   1  11   22.14    6.91
   3   1 -11   16.76    4.02
   3  -1 -11    4.76    5.22
  -3  -1  11   13.71    6.74
   3   1 -10   35.74    6.36
  -3   1  10   28.97    5.67
  -3  -1  10   26.30    6.40
   3  -1 -10   31.88    7.71
  -3   1   9  750.73   27.73
   3   1  -9  714.12   26.33
  -3  -1   9  734.03   27.67
   3  -1  -9  715.34   26.47
  -3   1   8 1291.89   23.29
   3   1  -8 1198.45   21.35
   3  -1  -8 1307.53   23.33
  -3  -1   8 1325.49   23.61
  -3   1   7 1075.09   32.26
   3   1  -7 1044.08   31.41
  -3  -1   7 1060.35   32.00
   3  -1  -7 1030.06   31.05
   3   1  -6  249.60   15.82
  -3   1   6  281.46   20.45
  -3   1   6  200.57   12.87
   3   1  -6  259.57    8.44
  -3  -1   6  285.76    8.84
   3  -1  -6  242.43   14.68
   3  -1  -6  290.97    9.18
  -3   1   5   25.65    5.32
   3   1  -5   16.57    3.08
   3   1  -5   19.79    3.68
  -3   1   5   18.05    2.88
  -3  -1   5   26.58    4.49
   3  -1  -5   15.75    1.96
   3  -1  -5   26.39    4.07
  -3  -1   5   12.86    2.16
  -3   1   4   33.06    5.17
   3   1  -4   24.25    5.07
  -3   1   4   16.51    2.54
   3   1  -4   28.92    4.72
   3  -1  -4   12.97    2.70
  -3  -1   4   32.51    4.85
   3  -1  -4   19.01    2.16
  -3  -1   4   26.65    4.99
   3  -1  -3 3894.91   42.85
  -3  -1   3 3658.94  166.92
   3  -1  -3 3073.11   34.48
  -3   1   2 3841.20   41.90
   3   1  -2 3582.91   39.30
   3  -1  -2 3649.86   39.85
   3  -1  -2 2885.19   32.41
  -3   1   1 3007.47   32.78
   3   1  -1 2294.88   25.44
   3   1  -1 2999.09   32.89
   3  -1  -1 2792.66   30.48
  -3   1   0   82.25    5.14
   3   1   0   46.81    2.98
   3   1   0   46.15    2.90
  -3  -1   0   68.76    4.32
   3  -1   0   42.02    2.61
   3  -1   0   88.17    5.98
   3   1   1   96.95    5.75
   3   1   1   76.03    4.90
   3   1   1   69.71    4.08
  -3   1  -1   58.21    3.72
   3  -1   1   89.64    5.36
  -3  -1  -1   72.38    4.27
   3  -1   1   78.50    4.82
   3  -1   1   56.29    3.74
   3   1   2   49.87    7.56
  -3   1  -2   32.88    3.95
  -3   1  -2   29.97    2.45
   3   1   2   35.83    2.44
  -3  -1  -2   29.49    2.48
   3  -1   2   33.99    2.72
  -3  -1  -2   36.91    3.09
   3  -1   2   38.77    3.27
   3   1   3 2191.61   25.34
   3   1   3 2311.65   25.80
  -3   1  -3 2076.40   23.80
  -3   1  -3 2427.62   27.37
  -3  -1  -3 2407.83   26.86
  -3  -1  -3 2164.84   24.90
   3  -1   3 2420.91   27.17
   3   1   4 1140.01   19.16
  -3   1  -4 1295.45   21.58
  -3   1  -4 1120.84   18.64
   3   1   4 1168.78   18.97
  -3  -1  -4 1069.46   19.05
   3  -1   4 1152.60   19.32
  -3  -1  -4 1271.20   21.23
   3  -1   4 1251.26   20.30
  -3   1  -5 2355.14   40.19
   3   1   5 2115.88   36.84
  -3   1  -5 2001.29   34.53
   3   1   5 2109.83   36.43
  -3  -1  -5 2064.34   35.62
   3  -1   5 2088.60   36.31
   3  -1   5 2124.34   36.38
  -3  -1  -5 2301.01   39.43
   3   1   6   72.27    8.46
  -3   1  -6   71.78    8.34
   3   1   6   46.67    7.46
   3  -1   6   69.83   11.57
  -3  -1  -6   58.88    5.10
   3  -1   6   50.13    3.94
   3   1   7  137.40   15.25
  -3   1  -7  139.86   10.27
   3  -1   7  140.51   10.32
  -3  -1  -7  139.08   11.99
   3   1   8  205.49   22.00
  -3   1  -8  232.64   22.73
   3  -1   8  209.02   21.21
  -3  -1  -8  236.06   22.31
   3   1   9  579.81   29.69
  -3   1  -9  645.17   32.77
   3  -1   9  562.75   28.62
  -3  -1  -9  621.53   31.08
   3   1  10  280.09   28.41
  -3   1 -10  289.54   29.23
   3  -1  10  261.07   26.45
  -3  -1 -10  307.22   15.68
   3   1  11  113.42   18.63
  -3   1 -11   95.75   22.08
  -3  -1 -11   85.80   25.50
   3  -1  11   74.42   25.32
   3   1  12    4.63    5.43
  -3   1 -12   -1.48    4.63
   3  -1  12    3.39    4.94
  -3  -1 -12    5.94    3.14
  -3   3  12  421.13   30.10
   3   3 -12  456.84   32.18
  -3  -3  12  445.70   32.20
   3  -3 -12  471.68   33.23
  -3   3  11   75.36   10.05
   3   3 -11   69.86   12.60
   3  -3 -11   65.48   17.04
  -3  -3  11   74.67   10.45
  -3   3  10  509.50   22.66
   3   3 -10  538.24   23.61
   3  -3 -10  510.74   22.34
  -3  -3  10  538.18   23.64
  -3   3   9  213.92   26.64
   3   3  -9  228.56   28.19
   3  -3  -9  202.60   25.37
  -3  -3   9  227.54   31.02
   3   3  -8  155.79   19.78
  -3   3   8  128.28   16.38
  -3  -3   8  131.42   13.75
   3  -3  -8  109.37   11.04
   3   3  -7  728.07   25.06
  -3   3   7  677.29   21.52
  -3  -3   7  754.17   23.37
   3  -3  -7  649.62   20.31
  -3   3   6 1232.10   30.33
  -3  -3   6 1295.67   32.09
   3  -3  -6 1207.19   29.52
   3  -3  -6 1131.17   29.50
   3   3  -5  298.27   11.80
   3   3  -5  277.78    7.77
  -3   3   5  274.50    7.87
  -3   3   5  244.24    6.28
  -3  -3   5  310.57    7.89
  -3  -3   5  246.56   11.26
   3  -3  -5  292.52   13.90
   3  -3  -5  273.52    7.26
   3   3  -4 2315.55   36.60
  -3   3   4 2311.11   36.46
  -3   3   4 1783.74   29.00
   3  -3  -4 2288.84   36.00
  -3  -3   4 2398.59   38.08
   3  -3  -4 2022.19   32.41
  -3  -3   4 1937.78   30.97
   3   3  -3  725.99    9.85
  -3   3   3  745.77   10.00
   3   3  -3  752.05    9.90
  -3   3   3  605.88    8.41
  -3  -3   3  768.64   10.32
   3  -3  -3  757.45    9.70
   3   3  -2 1176.38   15.08
  -3   3   2 1254.26   14.60
   3   3  -2 1283.36   15.17
  -3   3   2  881.75   10.97
  -3  -3   2 1316.72   16.04
   3  -3  -2 1007.86   12.43
  -3  -3   2 1043.57   12.49
   3  -3  -2 1266.61   14.57
   3   3  -1  656.11    8.06
  -3   3   1  711.13    8.41
   3   3  -1  711.38    8.93
   3  -3  -1  758.58    8.85
  -3  -3   1  688.98    8.77
  -3  -3   1  540.37    7.00
   3  -3  -1  466.20    7.07
   3   3   0 2375.18   26.48
   3  -3   0 2379.75   25.82
  -3  -3   0 2303.68   25.75
   3  -3   0 2896.03   31.78
   3   3   1  145.68    8.19
   3   3   1  160.07    9.28
  -3   3  -1   86.75    5.26
  -3  -3  -1  158.03    9.40
   3  -3   1   90.87    5.70
  -3  -3  -1  155.36    8.75
   3  -3   1  133.01    7.66
   3   3   2 4496.23   49.24
  -3   3  -2 3347.10   36.70
   3   3   2 3116.02   34.82
   3   3   2 3881.52   41.82
   3  -3   2 3883.34   42.51
   3   3   3 2712.33   31.02
  -3   3  -3 2617.92   29.46
  -3   3  -3 3060.67   34.22
   3   3   3 2847.86   31.30
   3  -3   3 2807.39   31.85
  -3  -3  -3 2638.24   29.99
  -3  -3  -3 2960.69   32.52
   3  -3   3 2983.66   33.31
   3   3   4 1404.43   24.06
  -3   3  -4 1673.74   26.92
  -3   3  -4 1430.07   23.29
   3   3   4 1471.26   23.38
  -3  -3  -4 1408.10   23.35
  -3  -3  -4 1657.95   26.26
   3  -3   4 1578.89   25.40
   3  -3   4 1522.83   24.77
   3   3   5  297.68   13.61
   3   3   5  312.95   18.42
  -3   3  -5  314.91    9.07
  -3   3  -5  357.13   21.17
   3  -3   5  337.85   10.28
   3  -3   5  333.96   14.76
  -3  -3  -5  353.04    8.90
  -3  -3  -5  282.63   12.91
  -3   3  -6 1093.19   28.76
   3   3   6  911.39   23.69
   3   3   6  907.98   22.76
   3  -3   6 1018.15   26.01
  -3  -3  -6 1050.23   26.19
   3  -3   6 1005.71   25.23
   3   3   7   17.81    4.06
   3   3   7   27.59    4.74
  -3   3  -7   36.39    6.70
  -3  -3  -7   31.53    6.05
   3  -3   7   34.25    7.40
   3   3   8  515.99   21.16
  -3   3  -8  597.91   23.69
  -3  -3  -8  597.06   23.39
   3  -3   8  554.91   22.47
   3   3   9  561.26   28.64
  -3   3  -9  625.14   31.45
  -3  -3  -9  653.37   32.55
   3  -3   9  599.82   30.37
   3   3  10  296.91   15.74
  -3   3 -10  362.75   18.47
   3  -3  10  295.49   15.76
  -3  -3 -10  327.70   16.40
   3   3  11   51.16   11.64
  -3   3 -11   47.83   14.79
   3  -3  11   50.69   12.56
  -3  -3 -11   58.69   13.54
   3   3  12  440.23   29.36
  -3   3 -12  427.09   27.40
   3  -3  12  385.57   25.20
  -3  -3 -12  428.28   27.18
   3   5 -12    8.73    4.99
  -3   5  12    7.46    4.51
  -3  -5  12    3.46    4.04
   3  -5 -12    4.17    2.25
  -3   5  11   37.37    8.96
   3   5 -11   55.02    8.20
  -3  -5  11   38.05   14.86
   3  -5 -11   43.73   13.81
  -3   5  10  226.83   22.26
   3   5 -10  251.06   24.54
   3  -5 -10  223.36   26.17
  -3  -5  10  256.35   25.42
   3   5  -9   37.67    9.94
  -3   5   9   35.17    8.16
  -3  -5   9   42.52   10.12
   3  -5  -9   43.07   12.66
   3   5  -8   57.47   10.94
  -3   5   8   43.21    6.22
  -3  -5   8   59.75   11.55
   3  -5  -8   43.13    5.22
   3   5  -7  220.49   15.14
  -3   5   7  295.68   19.75
  -3  -5   7  298.02   19.85
   3  -5  -7  273.25   18.28
  -3   5   6  247.35   15.19
   3   5  -6  287.89    9.75
  -3  -5   6  273.77   18.89
   3  -5  -6  231.34   15.11
   3  -5  -6  275.08   13.72
   3   5  -5  294.29    7.57
  -3   5   5  255.82   11.71
   3   5  -5  263.94   12.62
  -3   5   5  206.47    9.59
  -3  -5   5  320.12    9.59
  -3  -5   5  228.41   10.42
   3  -5  -5  231.40   11.49
   3  -5  -5  271.35    6.66
   3   5  -4  152.91    8.09
  -3   5   4  146.34    7.50
   3   5  -4  161.92    8.30
  -3   5   4  114.75    6.23
  -3  -5   4  166.98    9.29
  -3  -5   4  134.39    6.91
   3  -5  -4  124.08    7.39
   3  -5  -4  153.28    7.83
   3   5  -3    6.36    2.28
   3   5  -3    8.07    1.57
  -3   5   3   12.12    2.24
  -3   5   3    6.55    1.58
  -3  -5   3    5.82    2.52
  -3  -5   3    5.31    1.28
   3  -5  -3    5.06    1.72
   3  -5  -3    7.59    2.14
  -3   5   2    8.93    2.03
   3   5  -2    8.23    2.71
   3   5  -2    5.66    2.17
  -3  -5   2    6.07    1.86
  -3  -5   2    5.25    1.84
   3  -5  -2    2.45    1.43
   3  -5  -2    3.39    1.24
  -3   5   1  551.40    6.58
   3   5  -1  540.53    7.99
   3   5  -1  566.11    7.09
  -3  -5   1  517.77    7.27
  -3  -5   1  477.34    6.11
   3  -5  -1  562.33    6.60
  -3   5   0  624.54    8.40
   3   5   0  451.58    6.41
   3   5   0  548.88    6.48
  -3  -5   0  432.21    6.30
   3  -5   0  505.56    5.79
   3  -5   0  636.72    8.36
  -3  -5   0  441.60    5.18
   3   5   1  880.61   11.86
  -3  -5  -1  890.02   11.15
   3  -5   1  756.55    8.84
   3   5   2   12.03    2.24
   3   5   2   14.82    2.72
  -3   5  -2   12.24    1.89
   3   5   2    6.15    0.80
  -3   5  -2   11.06    1.86
   3  -5   2    4.10    1.58
   3  -5   2   13.34    2.37
  -3  -5  -2   11.39    1.46
  -3   5  -3  218.70   11.01
   3   5   3  194.09    9.83
  -3   5  -3  183.69    9.17
   3   5   3  186.84    8.84
   3  -5   3  202.03    9.88
   3  -5   3  206.68   10.06
  -3  -5  -3  209.79    9.92
  -3  -5  -3  186.56    9.28
  -3   5  -4  316.21    7.52
  -3   5  -4  276.07    6.47
   3   5   4  275.06    7.08
   3   5   4  277.41    5.92
   3  -5   4  287.48    9.33
  -3  -5  -4  309.00    6.59
   3  -5   4  314.29    7.19
  -3  -5  -4  278.08    6.95
  -3   5  -5  152.79    7.49
  -3   5  -5  134.54    6.86
   3   5   5  131.11    6.93
   3   5   5  127.86    6.68
   3  -5   5  124.10    6.69
  -3  -5  -5  145.86    6.91
   3  -5   5  138.16   10.57
  -3  -5  -5  150.51   12.62
   3   5   6  985.96   24.57
   3   5   6 1069.63   27.32
  -3   5  -6 1236.34   30.96
  -3  -5  -6 1150.26   28.46
   3  -5   6 1109.54   29.05
   3   5   7  234.43   17.69
   3   5   7  262.76   20.28
  -3   5  -7  325.00   25.37
  -3  -5  -7  286.57   21.34
   3  -5   7  269.28   20.41
  -3   5  -8   67.50   16.76
   3   5   8   78.54   17.56
   3  -5   8   77.30   16.52
  -3  -5  -8   71.75   13.26
   3   5   9  104.90   11.84
  -3   5  -9   93.12   14.30
  -3  -5  -9   91.79   11.94
   3  -5   9   93.77   19.31
   3   5  10   30.10    8.28
  -3   5 -10   33.62   10.58
  -3  -5 -10   32.29    9.40
   3  -5  10   46.46    7.03
   3   5  11    7.94    6.90
  -3   5 -11    8.05    4.80
   3  -5  11    0.02    4.05
  -3  -5 -11    8.51    5.58
  -3   7  12    5.88    2.41
   3   7 -12    3.46    5.10
  -3  -7  12   13.65    5.23
   3  -7 -12   17.96    5.93
  -3   7  11  950.90   60.57
   3   7 -11 1015.03  293.29
  -3  -7  11 1082.75  312.38
   3  -7 -11  889.83   57.41
  -3   7  10    8.28    3.40
   3   7 -10   21.27    5.58
  -3  -7  10    8.12    5.73
   3  -7 -10   18.92    5.61
   3   7  -9  518.00   26.50
  -3   7   9  494.94   25.66
  -3  -7   9  569.43   29.17
   3  -7  -9  472.78   27.05
   3   7  -8   78.81   14.25
  -3   7   8   81.97   15.16
  -3  -7   8   82.42   17.62
   3  -7  -8   61.64    6.91
   3   7  -7  589.69   18.98
  -3   7   7  509.60   16.45
  -3  -7   7  611.74   19.81
   3  -7  -7  506.26   16.30
  -3   7   6   44.64    6.47
   3   7  -6   41.75    7.15
  -3  -7   6   38.69    6.77
   3  -7  -6   32.80    3.12
   3  -7  -6   32.54    5.48
   3   7  -5 4858.52   81.61
  -3   7   5 4417.39   73.93
   3   7  -5 4537.11  260.50
  -3   7   5 3462.20  198.86
  -3  -7   5 5122.61  294.05
  -3  -7   5 4259.03   71.43
   3  -7  -5 3947.58  226.72
   3  -7  -5 4553.89   76.05
   3   7  -4  364.37   17.51
  -3   7   4  273.73   13.28
  -3   7   4  363.51   17.56
   3   7  -4  410.14   20.20
  -3  -7   4  433.13    9.29
  -3  -7   4  331.57   16.63
   3  -7  -4  312.43   15.68
   3  -7  -4  410.43    7.95
   3   7  -3 1205.90   19.91
   3   7  -3 1166.24   19.20
  -3   7   3 1073.88   17.35
  -3   7   3  760.66   13.10
  -3  -7   3 1261.38   20.92
  -3  -7   3 1055.51   17.35
   3  -7  -3  831.94   16.46
   3  -7  -3  995.31   16.12
   3   7  -2  105.68    6.61
  -3   7   2   87.98    5.29
   3   7  -2  106.77    7.34
  -3  -7   2   91.22    5.93
   3  -7  -2   88.16    5.23
  -3  -7   2   97.05    6.23
   3  -7  -2   47.70    3.62
  -3   7   1 2444.20   26.31
   3   7  -1 2244.80   25.48
   3   7  -1 2646.96   29.06
  -3  -7   1 2428.75   27.49
   3  -7  -1 3143.79   34.97
   3  -7  -1 2299.16   24.77
  -3  -7   1 2264.28   24.98
   3   7   0  213.96    2.89
   3   7   0  165.33    5.38
  -3   7   0  204.51    5.84
   3  -7   0  194.73    9.53
  -3  -7   0  173.81    3.80
  -3  -7   0  176.83    2.90
   3   7   1 7244.93  330.07
  -3   7  -1 5352.09  243.67
  -3   7  -1 5144.71  234.51
  -3  -7  -1 4978.78   54.52
   3  -7   1 5515.43  251.12
   3  -7   1 5111.80  233.01
   3   7   2  667.85   10.70
  -3   7  -2  476.73    6.37
   3   7   2  453.82    7.23
   3   7   2  353.99    4.44
  -3   7  -2  440.04    6.92
   3  -7   2  509.53    6.75
  -3  -7  -2  536.34    6.13
   3  -7   2  496.78    7.25
   3   7   3 1084.19   18.11
   3   7   3  753.11   13.54
  -3   7  -3  723.86   12.18
   3   7   3  657.56   10.67
  -3   7  -3  828.00   14.30
   3  -7   3  805.63   13.70
  -3  -7  -3  834.80   13.53
   3  -7   3  857.06   14.57
   3   7   4  769.23   15.42
  -3   7  -4  714.59   14.17
   3   7   4  688.79   12.95
  -3   7  -4  933.65   18.20
   3  -7   4  815.98   16.09
   3  -7   4  818.05   15.95
  -3  -7  -4  827.93   15.62
   3   7   5 1311.24   24.02
  -3   7  -5 1274.91   22.63
   3   7   5 1201.76   20.95
  -3   7  -5 1520.96   27.16
   3  -7   5 1415.06   25.36
  -3  -7  -5 1425.08   24.67
   3  -7   5 1400.35   24.88
   3   7   6  111.43   11.48
   3   7   6   99.40    6.92
  -3   7  -6  133.82    8.28
  -3  -7  -6  121.24    8.14
   3  -7   6  116.81    7.70
   3   7   7 2726.44  312.19
   3   7   7 3162.08   51.54
  -3   7  -7 3610.83   57.31
  -3  -7  -7 3518.65  402.81
   3  -7   7 3379.04  386.96
  -3   7  -8   55.50   12.51
   3   7   8   36.33    7.69
   3  -7   8   45.80    8.93
  -3  -7  -8   38.82    7.86
  -3   7  -9   45.98   10.31
   3   7   9   41.21    9.36
   3  -7   9   47.59    9.13
  -3  -7  -9   39.17    9.05
   3   7  10   23.95    5.72
  -3   7 -10   26.29    6.75
  -3  -7 -10   27.93    6.73
   3  -7  10   33.82    7.37
   3   7  11  367.16   31.35
  -3   7 -11  530.43   44.46
   3  -7  11  527.18   44.32
  -3  -7 -11  493.88   42.63
  -3   9  12   13.96    5.19
   3   9 -12   17.19    6.47
  -3  -9  12   14.70    7.26
   3  -9 -12    7.97    5.58
   3   9 -11  948.85   60.51
  -3   9  11  772.91   49.52
  -3  -9  11  961.61   61.29
   3  -9 -11  797.11   50.95
   3   9 -10   19.39    6.73
  -3   9  10    7.21    5.08
  -3  -9  10   -0.50    3.72
   3  -9 -10   14.62    4.46
   3   9  -9  425.25   22.14
  -3   9   9  430.68   22.38
  -3  -9   9  514.61   26.63
   3  -9  -9  446.20   23.10
   3   9  -8 1113.52   42.82
  -3   9   8  987.07   38.01
  -3  -9   8 1062.26   41.11
   3  -9  -8  891.94   34.47
   3   9  -7  798.18   15.58
  -3   9   7  695.28   15.50
  -3  -9   7  813.93   17.24
   3  -9  -7  694.97   13.91
  -3   9   6   48.83    5.50
   3   9  -6   56.43    5.98
  -3  -9   6   71.59   12.99
   3  -9  -6   35.18    6.14
   3  -9  -6   47.04    7.98
   3   9  -5 3819.15   64.59
  -3   9   5 3159.36   53.40
   3   9  -5 3104.49   52.71
  -3   9   5 2379.52   40.83
  -3  -9   5 3734.37   63.27
  -3  -9   5 3043.81   51.66
   3  -9  -5 2737.81   46.94
   3  -9  -5 3424.05   57.65
   3   9  -4  170.42    8.71
   3   9  -4  154.36    8.00
  -3   9   4  164.14    9.27
  -3   9   4  118.32    7.57
  -3  -9   4  171.93   10.70
  -3  -9   4  167.16   13.43
   3  -9  -4  132.64    7.81
   3  -9  -4  162.41   10.08
   3   9  -3 1114.83   18.54
   3   9  -3 1013.37   17.03
  -3   9   3  925.45   15.20
   3  -9  -3 1007.83   16.55
  -3  -9   3 1127.60   19.92
  -3  -9   3  966.72   16.10
   3  -9  -3  733.65   15.48
   3   9  -2 4100.60   45.45
  -3  -9   2 4638.39   51.28
   3  -9  -2 4280.21   46.29
  -3  -9   2 3922.24   43.32
   3  -9  -2 2656.13   30.38
  -3   9   1  887.19    9.83
   3   9  -1  801.34   10.50
   3   9  -1 1084.70   13.12
  -3  -9   1  826.42   11.04
   3  -9  -1 1159.00   14.34
   3  -9  -1  933.71   10.35
  -3  -9   1  907.99   11.16
   3   9   0    5.36    1.19
   3   9   0    3.52    2.49
  -3   9   0    6.70    2.16
   3  -9   0    3.26    2.02
  -3  -9   0   12.35    2.17
  -3  -9   0    7.47    1.05
  -3   9  -1 5139.84  234.36
   3   9   1 6347.55  289.32
  -3   9  -1 5564.33  253.32
   3  -9   1 6664.69  303.41
  -3  -9  -1 6308.72  287.54
   3  -9   1 5185.79  236.43
  -3  -9  -1 5605.83  255.13
   3   9   2  182.36    9.05
  -3   9  -2  133.65    7.30
  -3   9  -2  146.63    7.25
   3   9   2  122.48    7.68
  -3  -9  -2  186.42    8.62
   3  -9   2  166.31    8.90
   3  -9   2  143.50    8.45
  -3  -9  -2  146.96    6.84
   3   9   3  643.54   13.15
   3   9   3  438.56   10.81
  -3   9  -3  463.24    8.71
   3   9   3  339.02    5.86
  -3   9  -3  503.68    9.98
   3  -9   3  524.18    9.69
  -3  -9  -3  482.87    8.02
   3  -9   3  488.77    9.30
  -3   9  -4 1878.68   34.72
  -3   9  -4 1627.19   29.65
   3   9   4 1589.64   29.73
   3   9   4 1303.68   23.54
   3  -9   4 1769.09   32.34
   3  -9   4 1776.45   32.68
  -3  -9  -4 1760.29   31.56
  -3  -9  -4 1677.17   31.84
   3   9   5  494.23   13.76
  -3   9  -5  473.44   12.39
   3   9   5  377.37    9.97
  -3   9  -5  543.16   14.80
   3  -9   5  527.16   14.07
  -3  -9  -5  499.02   12.61
   3  -9   5  502.88   13.41
   3   9   6    2.06    1.11
   3   9   6    4.36    1.81
  -3   9  -6    2.78    1.59
  -3  -9  -6    2.07    1.02
   3  -9   6    4.76    3.08
   3   9   7 1014.58   17.38
   3   9   7 1242.87   22.51
  -3   9  -7 1461.72   25.51
  -3  -9  -7 1339.77   23.85
   3  -9   7 1382.72   24.25
  -3   9  -8   50.58    7.92
   3   9   8   63.08   11.92
   3  -9   8   58.03   10.61
  -3  -9  -8   51.40   10.17
  -3   9  -9   60.87   10.03
   3   9   9   62.89   10.12
   3  -9   9   37.82    4.11
  -3  -9  -9   58.03    5.83
   3   9  10  343.12   19.76
  -3   9 -10  389.61   21.57
   3  -9  10  373.24   19.45
  -3  -9 -10  380.16   18.77
   3   9  11   92.31   29.62
  -3   9 -11  154.94   23.96
   3  -9  11   99.08   28.59
  -3  -9 -11  148.28   22.47
   3  11 -11   33.44    8.08
  -3  11  11   19.14    6.95
  -3 -11  11   19.23    7.03
   3 -11 -11   15.15    3.50
   3  11 -10   79.27   17.04
  -3  11  10   89.47   11.84
  -3 -11  10   81.16   22.55
   3 -11 -10   90.91   10.84
   3  11  -9   -0.58    3.68
  -3  11   9    6.12    3.35
  -3 -11   9    5.54    5.11
   3 -11  -9    6.02    2.39
   3  11  -8  503.94   21.06
  -3  11   8  395.21   16.76
  -3 -11   8  459.11   19.40
   3 -11  -8  363.82   17.05
   3  11  -7   24.85    6.00
  -3  11   7   38.09    8.48
  -3 -11   7   31.35    6.28
   3 -11  -7   37.76    7.53
  -3  11   6  573.32   16.08
   3  11  -6  691.28   18.65
  -3 -11   6  689.58   18.80
   3 -11  -6  581.40   15.36
   3 -11  -6  509.85   14.23
  -3  11   5  629.55   16.61
  -3  11   5  886.50   22.15
   3  11  -5 1002.06   25.17
  -3 -11   5 1012.94   25.62
  -3 -11   5  845.08   21.15
   3 -11  -5  734.69   18.96
   3 -11  -5  908.44   22.40
   3  11  -4  177.28    9.74
   3  11  -4  157.52   12.61
  -3  11   4  145.72    8.27
   3 -11  -4  161.16    9.40
  -3 -11   4  174.37    8.70
  -3 -11   4  154.02   11.88
   3 -11  -4  110.95    6.56
   3  11  -3    6.68    1.62
   3  11  -3    4.26    1.63
  -3  11   3    6.26    2.61
   3 -11  -3    0.88    1.24
  -3 -11   3    6.20    2.23
  -3 -11   3    2.03    1.33
   3 -11  -3    5.48    2.65
   3  11  -2  290.49   13.92
   3  11  -2  360.29   17.21
  -3  11   2  280.64   13.08
   3 -11  -2  315.20   14.69
   3 -11  -2  422.58   20.06
  -3 -11   2  341.62   16.43
  -3 -11   2  316.88   14.97
  -3  11   1  152.25    7.13
   3  11  -1  150.21    7.95
   3  11  -1  108.49    5.71
  -3  11   1  110.74    5.19
   3 -11  -1  152.50    7.89
  -3 -11   1  125.69    6.73
  -3 -11   1  135.18    6.65
   3  11   0   34.39    4.19
   3  11   0   24.29    2.38
  -3  11   0   23.64    4.41
   3 -11   0   19.78    2.32
  -3 -11   0   37.08    5.86
  -3 -11   0   31.83    3.66
  -3 -11  -1 1132.84   19.01
   3 -11   1 1073.01   17.89
  -3 -11  -1 1193.64   18.40
   3  11   2 1644.56   26.57
   3  11   2 1079.14   18.27
  -3  11  -2 1278.92   20.09
  -3  11  -2 1090.81   18.54
   3 -11   2 1489.55   23.68
  -3 -11  -2 1237.78   19.07
  -3 -11  -2 1149.56   17.76
   3  11   3   29.23    4.59
   3  11   3   23.83    4.08
  -3  11  -3   24.91    3.22
  -3  11  -3   35.77    5.64
   3 -11   3   25.67    4.00
   3 -11   3   23.40    2.53
  -3 -11  -3   25.74    2.14
   3  11   4  223.11   15.70
   3  11   4  131.79    7.18
  -3  11  -4  153.15    7.14
   3  11   4  119.78    6.73
  -3  11  -4  166.82    9.71
   3 -11   4  168.46    8.93
  -3 -11  -4  153.33    6.92
   3 -11   4  173.15    8.70
  -3  11  -5    3.91    2.43
   3  11   5    5.15    2.28
  -3  11  -5    4.92    2.87
   3  11   5    3.03    1.33
   3 -11   5   12.50    4.10
  -3 -11  -5    4.50    1.38
   3  11   6  223.78   14.60
   3  11   6  273.72   19.32
  -3  11  -6  346.50   23.28
  -3 -11  -6  298.59   19.39
   3 -11   6  298.22   20.87
   3  11   7   21.69    4.46
   3  11   7   51.61    7.43
  -3  11  -7   56.76   10.26
  -3 -11  -7   42.57    8.23
   3 -11   7   60.69   10.53
  -3  11  -8  101.84   22.26
   3  11   8   84.61   13.99
   3 -11   8   61.26   13.44
  -3 -11  -8   90.80   19.58
  -3  11  -9   67.32   11.88
   3  11   9   47.81   10.15
   3 -11   9   42.47    7.03
  -3 -11  -9   44.71    3.25
  -3  11 -10   22.84    5.99
   3  11  10   35.27    7.55
   3 -11  10   20.38    5.97
  -3 -11 -10   24.03    4.99
  -3  11 -11   12.48    4.06
   3  11  11    7.56    3.70
   3 -11  11   11.71    5.40
  -3 -11 -11    3.57    3.21
   3  13 -11   50.87    9.97
  -3  13  11   31.79    7.57
  -3 -13  11   34.83    8.69
   3 -13 -11   28.00   10.75
   3  13 -10    5.18    3.53
  -3  13  10    4.67    2.73
  -3 -13  10    4.52    4.22
   3 -13 -10    4.44    2.20
   3  13  -9  878.63   37.03
  -3  13   9  740.13   30.88
  -3 -13   9  915.27   38.12
   3 -13  -9  724.84   30.38
   3  13  -8  517.49   20.01
  -3  13   8  438.89   16.73
  -3 -13   8  560.63   22.18
   3 -13  -8  427.05   16.59
   3  13  -7 2405.37   89.62
  -3  13   7 1935.57   72.16
  -3 -13   7 2430.47   90.66
   3 -13  -7 1857.38   69.40
  -3  13   6   19.17    3.62
   3  13  -6   19.29    3.98
  -3 -13   6   16.38    3.51
   3 -13  -6   12.01    2.59
   3 -13  -6    9.85    2.47
  -3  13   5  126.05    7.39
   3  13  -5  167.36   12.52
  -3 -13   5  163.54    9.66
   3 -13  -5  143.93    8.14
   3 -13  -5  115.67    8.03
   3  13  -4   15.32    3.02
   3  13  -4    7.01    2.37
  -3  13   4    3.85    2.08
   3 -13  -4    4.94    1.13
  -3 -13   4    6.20    2.56
  -3 -13   4    6.34    1.96
   3 -13  -4    6.97    2.38
  -3  13   3 3018.74   53.60
   3  13  -3 3159.30   56.64
   3  13  -3 3727.65   66.42
  -3 -13   3 3757.65   67.25
   3 -13  -3 4180.60   74.39
   3 -13  -3 3357.20   59.40
  -3 -13   3 3228.87   57.65
   3 -13  -3 2219.50   40.52
  -3  13   2 1785.87   27.68
   3  13  -2 1771.75   28.84
   3  13  -2 2359.17   37.23
  -3 -13   2 2109.67   33.89
   3 -13  -2 2493.22   39.43
   3 -13  -2 2004.01   31.01
  -3 -13   2 1975.99   31.62
  -3  13   1 3654.28   55.50
   3  13  -1 4674.29   71.66
   3  13  -1 3567.46   55.45
  -3  13   1 3445.38   52.32
   3 -13  -1 4526.71   69.96
  -3 -13   1 3584.49   55.87
  -3 -13   1 4026.95   61.79
   3  13   0   39.78    4.56
   3  13   0   46.37    6.28
  -3  13   0   37.71    5.52
   3 -13   0   37.22    4.48
  -3 -13   0   43.28    4.54
  -3 -13   0   43.82    4.01
   3  13   1  691.31   12.35
  -3  13  -1  719.12   13.20
  -3  13  -1  736.79   11.63
   3 -13   1  819.57   13.09
   3 -13   1  685.76   12.27
  -3 -13  -1  669.93   10.71
   3  13   2   18.27    2.39
   3  13   2   11.34    4.14
  -3  13  -2   16.90    1.74
  -3  13  -2    4.82    1.38
   3 -13   2   17.31    2.49
  -3 -13  -2   13.36    1.29
   3 -13   2    4.37    1.07
  -3 -13  -2    4.66    1.16
   3  13   3 2029.52   34.99
  -3  13  -3 1681.97   29.82
  -3  13  -3 1697.03   28.83
   3  13   3 1507.18   27.57
  -3 -13  -3 2133.05   35.49
   3 -13   3 1880.40   32.00
   3 -13   3 1600.70   28.13
  -3 -13  -3 1578.17   26.47
   3  13   4  968.17   24.04
   3  13   4  669.50   17.54
  -3  13  -4  669.80   17.20
  -3  13  -4  822.15   22.68
   3 -13   4  840.66   20.98
  -3 -13  -4  717.86   17.42
   3  13   5 1459.00   36.50
  -3  13  -5 1478.45   36.52
  -3  13  -5 1890.40   46.68
   3  13   5 1137.25   27.69
   3 -13   5 1783.07   43.60
  -3 -13  -5 1631.98   39.56
   3  13   6   18.87    4.09
   3  13   6   30.27    7.12
  -3  13  -6   23.67    5.33
  -3 -13  -6   22.95    4.37
   3 -13   6   23.90    5.05
   3  13   7  115.05    9.45
   3  13   7  173.42   15.15
  -3  13  -7  183.51   15.26
  -3 -13  -7  174.36   18.94
   3 -13   7  182.36   15.44
  -3  13  -8   82.89   17.53
   3  13   8   67.06   12.02
   3 -13   8   86.98    8.66
  -3 -13  -8   69.64    9.78
  -3  13  -9 1367.63  253.86
   3  13   9 1109.98  206.15
   3 -13   9 1279.24   51.21
  -3 -13  -9 1239.72  229.99
  -3  13 -10  136.53   21.84
   3  13  10   64.17   19.82
   3 -13  10  126.17   15.41
  -3 -13 -10   74.61   20.63
  -3  13 -11  209.68   26.63
   3  13  11  172.06   14.01
   3 -13  11  162.36   35.49
  -3 -13 -11  187.97   14.19
   3  15 -11  111.02   28.98
  -3  15  11  119.61   22.60
  -3 -15  11  158.78   27.88
   3 -15 -11   76.48   26.89
   3  15 -10  316.92   19.55
  -3  15  10  271.31   16.15
  -3 -15  10  317.99   18.79
   3 -15 -10  299.37   17.40
   3  15  -9  363.25   16.47
  -3  15   9  235.27   24.90
  -3 -15   9  336.22   16.31
   3 -15  -9  250.86   25.75
   3  15  -8  110.24   10.50
  -3  15   8   95.28   14.32
  -3 -15   8  103.03   15.14
   3 -15  -8   76.44   11.23
   3  15  -7  373.61   29.99
  -3  15   7  273.85   21.90
  -3 -15   7  353.06   28.63
   3 -15  -7  264.63   23.34
  -3  15   6    8.14    3.11
   3  15  -6    2.21    2.81
  -3 -15   6    1.17    2.94
   3 -15  -6    2.37    1.45
   3 -15  -6    4.34    2.06
  -3  15   5 1133.71   28.61
   3  15  -5 1408.33   35.18
  -3 -15   5 1424.36   35.76
   3 -15  -5 1193.02   29.86
   3 -15  -5  923.88   26.82
   3  15  -4  331.04    9.67
   3  15  -4  243.17   14.76
  -3  15   4  260.52    7.91
   3 -15  -4  271.06   11.70
  -3 -15   4  320.30    9.86
  -3 -15   4  279.54    9.34
   3 -15  -4  204.83   16.13
  -3  15   3  389.84    7.65
   3  15  -3  466.36    9.83
   3  15  -3  568.02   11.47
  -3 -15   3  554.47   11.86
   3 -15  -3  610.36   12.86
   3 -15  -3  477.95    9.27
  -3 -15   3  466.69    9.40
   3 -15  -3  322.59    9.06
  -3  15   2  367.62    7.62
   3  15  -2  315.56   13.96
   3  15  -2  247.16   11.19
  -3  15   2  230.53   10.37
   3 -15  -2  348.00   16.21
  -3 -15   2  281.05   13.72
  -3 -15   2  277.66    8.26
   3  15  -1  817.81   16.02
  -3  15   1  876.29   15.69
  -3  15   1  750.14   13.51
   3  15  -1  992.35   18.55
  -3 -15   1  842.35   16.67
   3 -15  -1  945.50   19.49
  -3 -15   1  875.23   16.34
   3  15   0 1011.43   18.50
   3  15   0 1113.41   21.03
  -3  15   0 1181.83   20.88
  -3  15   0 1082.35   21.79
  -3 -15   0 1237.07   23.48
   3 -15   0 1057.47   20.14
  -3 -15   0 1095.33   19.92
  -3  15  -1 1197.76   22.89
   3  15   1 1073.17   20.37
  -3  15  -1 1179.87   21.03
   3  15   1 1138.56   20.55
   3 -15   1 1155.77   20.72
  -3 -15  -1 1174.19   24.28
   3 -15   1 1143.86   21.69
  -3 -15  -1  994.77   17.99
   3  15   2   44.62    3.03
  -3  15  -2   32.12    3.55
  -3  15  -2   45.47    3.59
   3  15   2   44.68    6.28
  -3 -15  -2   50.73    3.92
   3 -15   2   63.92    6.56
   3 -15   2   41.17    3.79
  -3 -15  -2   28.25    1.75
   3  15   3 1853.79   32.50
  -3  15  -3 1311.14   26.42
  -3  15  -3 1422.25   24.41
   3  15   3 1165.45   22.06
  -3 -15  -3 1743.87   29.24
   3 -15   3 1732.64   29.67
   3 -15   3 1304.31   23.48
  -3 -15  -3 1265.42   21.45
  -3  15  -4  316.46   19.68
  -3  15  -4  281.75   15.76
   3  15   4  249.85   13.91
  -3 -15  -4  363.83   19.31
   3 -15   4  317.53   16.70
  -3 -15  -4  267.27   13.69
   3  15   5 1154.23   34.55
  -3  15  -5 1180.65   34.63
  -3  15  -5 1445.40   42.83
   3 -15   5 1451.63   42.51
  -3 -15  -5 1246.51   36.09
  -3  15  -6  481.91   10.97
   3  15   6  374.51   12.19
   3 -15   6  479.28   10.31
  -3 -15  -6  444.93    8.63
   3  15   7  437.02   17.07
   3  15   7  589.78   23.78
  -3  15  -7  806.10   32.53
  -3 -15  -7  700.65   27.76
   3 -15   7  792.56   31.15
  -3  15  -8   11.58    4.08
   3  15   8    6.96    3.59
   3 -15   8   -0.56    3.06
  -3 -15  -8    3.50    1.95
  -3  15  -9  284.51   30.09
   3  15   9  224.61   19.29
   3 -15   9  260.26   27.35
  -3 -15  -9  225.48   25.01
  -3  15 -10   45.60   13.50
   3  15  10   54.54   14.76
   3 -15  10   41.37   14.12
  -3 -15 -10   40.38   12.71
  -3  15 -11  396.21   26.47
   3  15  11  254.20   24.01
   3 -15  11  317.99   23.20
   3  17 -11   60.12   24.16
  -3  17  11   57.79   18.28
  -3 -17  11   42.84   18.18
   3 -17 -11   45.86   14.83
   3  17 -10  191.34   34.67
  -3  17  10   97.82   26.31
  -3 -17  10  211.40   63.75
   3 -17 -10  167.32   27.29
   3  17  -9    8.46    3.49
  -3  17   9    3.25    3.11
  -3 -17   9    3.62    4.10
   3 -17  -9   -1.18    2.98
   3  17  -8 1152.51   56.64
  -3  17   8  919.99   45.26
  -3 -17   8 1206.37   59.27
   3 -17  -8  874.81   43.85
   3  17  -7  264.89   21.54
  -3  17   7  205.51   16.80
  -3 -17   7  274.26   22.47
   3 -17  -7  181.53   15.11
   3  17  -6  380.03   24.13
  -3  17   6  257.43   14.03
  -3 -17   6  327.44   14.22
   3 -17  -6  216.31   10.50
  -3  17   5  124.62   13.90
   3  17  -5  166.93   16.45
  -3 -17   5  134.61   12.48
   3 -17  -5   88.86    8.72
   3 -17  -5   77.54    9.22
  -3  17   4  598.35   15.86
   3  17  -4  836.28   22.77
  -3 -17   4  804.90   21.24
   3 -17  -4  669.84   17.02
  -3 -17   4  664.72   17.25
   3 -17  -4  475.13   17.40
  -3  17   3   84.39    7.61
   3  17  -3  101.41    9.96
   3  17  -3   51.53    5.74
  -3  17   3   70.36    7.91
   3 -17  -3   78.96    7.25
  -3 -17   3   66.58    8.03
  -3 -17   3   49.52    6.39
   3 -17  -3   47.45    5.75
  -3  17   2 1171.82   19.99
   3  17  -2 1093.52   19.62
   3  17  -2  870.29   16.37
  -3  17   2  950.69   16.71
   3 -17  -2 1130.63   20.59
  -3 -17   2 1003.26   18.93
  -3 -17   2  989.60   17.87
  -3  17   1  446.18    8.11
   3  17  -1  396.52    8.60
  -3  17   1  362.97    6.70
   3  17  -1  451.22    9.08
  -3 -17   1  455.13   14.00
   3 -17  -1  432.08    9.19
  -3 -17   1  429.71   12.94
  -3  17   0  835.63   17.83
   3  17   0  838.38   15.65
  -3  17   0  822.05   13.94
  -3  17   0  596.77   10.27
   3  17   0  826.80   14.75
   3 -17   0  773.91   15.99
  -3 -17   0  969.97   21.94
  -3 -17   0  810.20   14.62
  -3  17  -1  279.37   13.24
   3  17   1  239.62   14.50
  -3  17  -1  261.56   11.20
   3  17   1  235.37   10.36
   3 -17   1  237.37   10.26
  -3 -17  -1  293.06   16.29
   3 -17   1  252.21   11.60
  -3 -17  -1  219.13   10.47
   3  17   2  539.97   15.72
  -3  17  -2  472.15   13.16
  -3  17  -2  458.36   11.38
   3  17   2  335.34    9.95
  -3 -17  -2  510.72   12.72
   3 -17   2  583.46   14.43
   3 -17   2  442.81   12.36
  -3 -17  -2  308.39    8.13
   3  17   3  735.01   18.93
   3  17   3  431.01   17.30
  -3  17  -3  614.82   15.20
  -3  17  -3  565.51   15.38
   3 -17   3  653.82   16.32
  -3 -17  -3  568.41   13.89
  -3 -17  -3  493.05   12.17
  -3  17  -4 1114.36   28.40
  -3  17  -4 1136.39   28.15
   3  17   4  890.79   23.32
  -3 -17  -4 1512.29   36.43
   3 -17   4 1390.73   34.15
  -3 -17  -4 1064.10   25.99
   3  17   5   24.09    5.16
  -3  17  -5   11.64    3.22
  -3  17  -5   35.30    7.35
   3 -17   5   24.81    5.55
  -3 -17  -5   29.42    5.03
  -3  17  -6  222.32   24.20
   3  17   6  180.94   19.80
   3 -17   6  218.11   20.74
  -3 -17  -6  188.84   19.74
  -3  17  -7    0.94    4.63
   3  17   7    3.62    4.14
   3 -17   7    6.01    3.80
  -3 -17  -7    6.12    2.13
  -3  17  -8   92.63   17.29
   3  17   8   65.78   11.47
   3 -17   8  108.09   10.71
  -3 -17  -8   72.73    7.65
  -3  17  -9  228.15   24.43
   3  17   9  189.48   20.64
   3 -17   9  195.55   26.65
  -3 -17  -9  204.18   21.66
  -3  17 -10  179.07   29.44
   3  17  10  140.60   23.67
   3 -17  10  169.68   25.99
   3  19 -10  472.83   40.00
  -3  19  10  329.15   28.42
  -3 -19  10  486.85   41.57
   3 -19 -10  389.36   33.07
   3  19  -9   56.35   13.96
  -3  19   9   49.66    7.51
  -3 -19   9   60.39   11.13
   3 -19  -9   36.27   10.07
   3  19  -8    5.25    4.17
  -3  19   8    1.89    2.07
  -3 -19   8    7.78    4.97
   3 -19  -8    4.34    1.98
   3  19  -7   20.72    5.79
  -3  19   7   23.55    5.78
  -3 -19   7   18.69    5.43
   3 -19  -7   25.12    4.11
   3  19  -6  939.55   36.34
  -3  19   6  678.83   26.67
  -3 -19   6  920.47   35.79
   3 -19  -6  599.00   23.75
  -3  19   5  758.86   13.83
   3  19  -5 1051.75   19.35
  -3 -19   5 1011.82   18.88
   3 -19  -5  903.52   15.84
   3 -19  -5  629.91   12.78
  -3  19   4 2097.34   60.27
   3  19  -4 1819.38   53.09
  -3  19   4 1242.04   37.03
  -3 -19   4 1722.51   50.56
   3 -19  -4  978.94   29.55
  -3  19   3  190.97   11.24
   3  19  -3  174.85   12.31
  -3  19   3  154.27   11.73
  -3 -19   3  151.71   15.46
  -3 -19   3  122.72    6.99
   3 -19  -3  111.68   14.59
  -3  19   2   21.63    2.27
   3  19  -2   32.28    4.61
   3  19  -2   18.57    2.48
  -3  19   2   18.15    1.78
   3 -19  -2   23.53    3.04
  -3 -19   2   31.66    4.44
  -3 -19   2   19.50    2.13
   3  19  -1  164.78   10.18
   3  19  -1  196.65   15.71
  -3  19   1  183.35   10.80
  -3  19   1  154.25   10.37
  -3 -19   1  177.12   15.08
   3 -19  -1  159.19   10.02
  -3 -19   1  153.75   12.87
   3  19   0 1973.02   46.67
   3  19   0 2021.70   48.34
  -3  19   0 1882.24   44.10
  -3  19   0 1347.56   31.68
  -3  19   0 2145.51   51.62
  -3 -19   0 2321.38   55.51
   3 -19   0 1920.10   46.06
  -3 -19   0 1763.84   41.77
   3  19   1  437.19   11.10
  -3  19  -1  508.07   14.80
   3  19   1  441.92   13.24
  -3  19  -1  462.67   11.42
  -3 -19  -1  503.68   13.59
   3 -19   1  503.72   12.41
  -3 -19  -1  392.97   10.27
   3  19   2 1490.00   36.68
   3  19   2 1142.40   28.78
  -3  19  -2 1462.23   35.29
  -3  19  -2 1552.16   38.63
   3 -19   2 1707.68   41.08
  -3 -19  -2 1539.57   37.03
  -3 -19  -2  913.18   22.29
   3  19   3   72.77    6.10
  -3  19  -3   90.81    7.83
  -3  19  -3  113.29   11.25
   3 -19   3  119.41    6.77
  -3 -19  -3   89.80    7.66
  -3 -19  -3   78.70    6.80
  -3  19  -4   20.63    4.13
  -3  19  -4   22.65    3.54
   3  19   4   21.40    4.44
  -3 -19  -4   28.19    4.22
   3 -19   4   29.39    5.51
  -3 -19  -4   22.72    3.58
  -3  19  -5   30.86    6.91
  -3  19  -5   19.43    3.68
   3  19   5   27.55    6.07
  -3 -19  -5   33.16    5.38
   3 -19   5   33.57    5.88
  -3 -19  -5   24.07    3.70
   3  19   6  865.64   33.63
  -3  19  -6 1306.30   50.03
   3 -19   6 1341.79   50.69
  -3 -19  -6 1461.54   54.40
  -3 -19  -6 1128.02   42.26
  -3  19  -7  468.65   24.43
   3  19   7  348.01   18.68
   3 -19   7  481.12   24.63
  -3 -19  -7  395.82   19.85
  -3  19  -8  535.85   26.90
   3  19   8  425.56   19.27
   3 -19   8  524.27   23.41
  -3 -19  -8  481.83   19.77
  -3  19  -9   32.98   10.07
   3  19   9   17.05    5.99
   3 -19   9   27.60    7.84
  -3 -19  -9   17.70    6.73
  -3  19 -10   32.05    8.89
   3  19  10   26.69    6.27
   3 -19  10   24.27    6.63
   3  21 -10   42.36   10.54
  -3  21  10   21.35    6.40
  -3 -21  10   32.79    9.31
   3 -21 -10   27.88    6.70
   3  21  -9  382.37   21.57
  -3  21   9  249.63   15.65
  -3 -21   9  378.18   21.44
   3 -21  -9  239.80   33.13
   3  21  -8   86.74   16.73
  -3  21   8   67.38    6.46
  -3 -21   8   82.51   13.95
   3 -21  -8   47.43   10.31
   3  21  -7  805.74   40.20
  -3  21   7  573.75   28.63
  -3 -21   7  774.20   39.38
   3 -21  -7  524.80   26.65
   3  21  -6    8.44    2.69
  -3  21   6    7.29    3.65
  -3 -21   6   17.69    5.75
   3 -21  -6   10.93    3.84
  -3  21   5    2.59    1.49
   3  21  -5    9.13    3.48
  -3  21   5   14.58    3.33
  -3 -21   5    6.04    2.03
   3 -21  -5    4.33    2.57
  -3  21   4  141.49   11.60
   3  21  -4  149.00   14.68
  -3  21   4  108.25   12.10
  -3 -21   4  119.70   15.59
   3 -21  -4   75.62   10.39
  -3  21   3  972.54   28.33
   3  21  -3  939.69   28.14
  -3  21   3  572.46   17.61
  -3 -21   3  888.05   27.09
  -3 -21   3  732.59   22.34
   3 -21  -3  455.59   14.91
  -3  21   2  352.86   17.94
   3  21  -2  385.35   20.02
  -3  21   2  290.81   16.78
  -3 -21   2  365.35   19.36
  -3 -21   2  335.31   17.41
   3  21  -1  762.22   20.08
  -3  21   1  898.87   21.85
   3  21  -1  844.09   21.56
  -3  21   1  656.81   16.14
  -3 -21   1  979.90   25.39
  -3 -21   1  777.66   19.62
   3  21   0  141.42   11.16
   3  21   0  122.67    8.43
  -3  21   0  110.81    7.30
  -3  21   0   86.56    4.72
  -3  21   0  159.33   11.99
  -3 -21   0  161.77   19.27
  -3 -21   0   89.55   10.58
  -3  21  -1   71.10   11.73
   3  21   1   59.90    7.78
   3  21   1   54.95    5.41
  -3  21  -1   59.14    7.51
  -3 -21  -1   66.88    9.21
   3 -21   1   67.60    7.35
  -3 -21  -1   45.15    5.07
   3  21   2   22.71    4.26
  -3  21  -2   11.09    1.81
  -3  21  -2   20.24    5.01
   3 -21   2   13.96    2.92
  -3 -21  -2   13.64    2.18
  -3 -21  -2    5.24    1.45
  -3  21  -3  945.24   28.88
  -3  21  -3  865.63   25.34
   3  21   3  630.21   19.84
  -3 -21  -3 1013.43   29.39
   3 -21   3 1142.54   33.40
  -3 -21  -3  664.06   19.77
  -3  21  -4  274.95   24.29
  -3  21  -4  236.21   19.20
   3  21   4  182.60   16.73
  -3 -21  -4  253.83   18.65
   3 -21   4  327.75   24.29
  -3 -21  -4  206.51   16.04
  -3  21  -5  675.27   27.04
  -3  21  -5  537.93   20.77
   3  21   5  449.15   26.17
  -3 -21  -5  726.07   27.35
   3 -21   5  701.46   27.41
  -3 -21  -5  558.90   21.32
  -3  21  -6   69.52   10.29
   3  21   6   50.34    7.68
   3 -21   6   61.29   12.13
  -3 -21  -6   50.61    8.30
  -3  21  -7    4.10    4.45
   3  21   7    6.42    3.18
   3 -21   7    1.24    3.05
  -3 -21  -7    3.70    2.09
  -3  21  -8   15.70    4.72
   3  21   8   17.84    5.22
   3 -21   8   13.75    6.07
  -3 -21  -8    9.47    3.06
  -3  21  -9  295.38   21.70
   3  21   9  199.20   15.50
   3 -21   9  289.95   19.84
  -3  21 -10    8.57    3.08
   3  21  10    2.90    4.10
   3 -21  10   14.25    6.55
   3  23 -10  199.25   17.35
  -3  23  10   53.10   19.97
  -3 -23  10  209.28   15.32
   3 -23 -10  120.68   18.94
   3  23  -9   61.80   11.49
  -3  23   9   28.47    8.12
  -3 -23   9   38.08    8.59
   3 -23  -9   30.83    9.71
   3  23  -8  985.73   47.51
  -3  23   8  625.31   29.97
  -3 -23   8  984.21   46.43
   3 -23  -8  667.67   33.84
   3  23  -7   52.88    9.04
  -3  23   7   27.07    6.50
  -3 -23   7   44.35    8.34
   3 -23  -7   25.76    7.27
   3  23  -6  314.19   20.80
  -3  23   6  194.23   19.74
  -3 -23   6  275.94   19.20
   3 -23  -6  201.80   16.03
  -3  23   5 1305.82   48.87
   3  23  -5 1315.71   50.72
  -3  23   5  762.97   29.46
  -3 -23   5 1196.43   45.74
   3 -23  -5  711.31   27.95
  -3  23   4  106.74   13.43
   3  23  -4  120.90   15.66
  -3  23   4   83.00   10.12
  -3 -23   4  110.63   15.75
   3 -23  -4   63.25    9.38
  -3  23   3  200.99   15.41
   3  23  -3  256.44   21.71
  -3  23   3  160.81   15.09
  -3 -23   3  224.67   22.38
   3 -23  -3   92.10    7.93
  -3  23   2 1499.01   24.21
  -3  23   2 1984.15   31.04
   3  23  -2 1932.37   31.56
  -3 -23   2 1908.37   32.28
  -3 -23   2 1590.96   26.09
  -3  23   1   42.90    6.16
  -3  23   1   71.56    6.38
   3  23  -1   61.83    5.08
  -3 -23   1   75.05    6.54
  -3 -23   1   52.58    9.53
   3  23   0  919.48   27.19
  -3  23   0  735.30   21.40
  -3  23   0  620.79   18.13
  -3  23   0  947.57   33.42
  -3 -23   0  978.11   29.48
  -3 -23   0  649.78   19.45
  -3  23  -1 2390.80  358.60
   3  23   1 2167.37   62.21
  -3  23  -1 1799.48  269.60
  -3 -23  -1 2537.42  380.50
   3 -23   1 2596.94  389.04
  -3 -23  -1 1868.26   53.67
   3  23   2  395.33    9.35
  -3  23  -2  421.75    7.92
  -3  23  -2  552.22   12.67
   3 -23   2  517.07    9.43
  -3 -23  -2  497.50    9.71
  -3  23  -3  103.79   10.88
  -3  23  -3   81.22   11.34
   3  23   3   86.09   10.11
  -3 -23  -3  107.00   11.68
   3 -23   3  125.18   15.13
  -3 -23  -3   62.08    9.23
  -3  23  -4 1370.51   52.82
  -3  23  -4 1242.07   46.41
   3  23   4  963.17   37.66
  -3 -23  -4 1305.30   48.55
   3 -23   4 1664.43   62.08
  -3 -23  -4 1100.58   41.12
  -3  23  -5  109.47   20.91
  -3  23  -5   67.01   11.77
   3  23   5   74.71   11.60
  -3 -23  -5   84.57   11.75
   3 -23   5  110.48   17.49
  -3 -23  -5   78.26   17.27
  -3  23  -6  376.84   17.43
   3  23   6  266.30   23.51
   3 -23   6  445.51   19.18
  -3 -23  -6  336.49   14.16
  -3  23  -7  462.40   20.50
   3  23   7  281.62   21.41
   3 -23   7  489.15   20.82
  -3 -23  -7  373.95   16.70
  -3  23  -8  388.97   34.74
   3  23   8  254.47   25.40
   3 -23   8  408.73   24.12
  -3  23  -9   -1.42    4.96
   3  23   9    1.91    4.01
   3 -23   9    2.95    3.20
   3  25  -9   40.63   11.48
  -3  25   9   11.35    3.05
  -3 -25   9   42.80    6.87
   3 -25  -9   25.09    5.73
   3  25  -8  848.00   54.18
  -3  25   8  521.42   33.89
  -3 -25   8  845.76   55.57
   3 -25  -8  557.76   37.35
   3  25  -7   46.60    9.38
  -3  25   7   23.41    6.74
  -3 -25   7   56.65   10.35
   3 -25  -7   29.82    7.39
   3  25  -6  441.52   19.54
  -3  25   6  214.52   23.34
  -3 -25   6  384.33   17.93
   3 -25  -6  215.58   11.55
  -3  25   5    6.18    2.49
   3  25  -5    5.05    2.01
  -3  25   5    6.24    2.44
  -3 -25   5   19.77    4.69
   3 -25  -5    4.08    2.55
  -3  25   4  381.74   30.15
   3  25  -4  406.53   89.20
  -3  25   4  225.37   20.86
  -3 -25   4  356.20   28.56
   3 -25  -4  172.18   20.53
  -3  25   3   32.64    5.85
  -3  25   3   34.77    5.70
   3  25  -3   59.49   11.69
  -3 -25   3   34.35    6.67
   3 -25  -3   15.87    4.74
  -3  25   2 1341.95   49.87
  -3  25   2 2035.15   75.05
   3  25  -2 1750.90   65.26
  -3 -25   2 2037.19   75.99
  -3  25   1   12.29    2.26
  -3  25   1   17.95    2.73
   3  25  -1   12.69    2.48
  -3 -25   1   15.63    3.36
  -3 -25   1   10.12    2.17
  -3  25   0  220.06   21.74
  -3  25   0  147.39   10.92
  -3  25   0  127.02    9.48
   3  25   0  189.71   16.95
  -3 -25   0  208.11   23.32
  -3 -25   0  105.94   12.37
  -3  25  -1   29.20    4.46
  -3  25  -1   53.53   12.21
  -3 -25  -1   52.42    7.75
   3 -25   1   40.09    6.22
  -3 -25  -1   28.24    5.01
   3  25   2  205.44   19.71
  -3  25  -2  208.21   19.93
  -3  25  -2  325.03   25.05
   3 -25   2  287.28   11.52
  -3 -25  -2  252.95   49.90
  -3  25  -3  136.66   19.61
  -3  25  -3   51.10   11.14
   3  25   3   87.96   15.90
  -3 -25  -3   79.47   14.53
   3 -25   3   85.16   16.29
  -3 -25  -3   52.02   10.96
  -3  25  -4 1664.17   58.31
  -3  25  -4 1298.17   44.76
   3  25   4 1247.05   43.95
  -3 -25  -4 1580.08   54.11
   3 -25   4 1931.10   66.36
  -3 -25  -4 1214.70   41.99
  -3  25  -5   21.54    4.18
   3  25   5    3.90    3.16
   3 -25   5   13.22    3.65
  -3 -25  -5    5.12    2.30
  -3  25  -6   54.85   10.05
   3  25   6   56.25    7.20
   3 -25   6   72.15   10.36
  -3 -25  -6   40.66    6.70
  -3  25  -7   10.27    4.48
   3  25   7    6.16    1.87
   3 -25   7    4.01    2.55
  -3  25  -8  129.57   21.43
   3  25   8   49.87   12.48
   3 -25   8   89.61   19.25
  -3  25  -9   13.94    5.52
   3  25   9   -0.28    4.13
   3 -25   9   14.56    5.46
   3  27  -9    9.89    4.62
  -3  27   9   14.69    4.95
  -3 -27   9   14.27    5.62
   3 -27  -9    3.42    2.55
   3  27  -8   14.58    5.95
  -3  27   8    0.67    2.84
  -3 -27   8    9.73    3.77
   3 -27  -8   13.31    4.58
   3  27  -7   42.55   11.94
  -3  27   7   18.19    5.76
  -3 -27   7   38.26   11.02
   3 -27  -7   20.04    5.19
   3  27  -6   19.51    5.82
  -3  27   6    2.32    1.48
  -3 -27   6   16.13    4.71
   3 -27  -6    5.15    2.63
   3  27  -5   79.89   14.74
  -3  27   5   44.44    7.15
  -3 -27   5   75.04   11.08
   3 -27  -5   44.58    3.79
   3  27  -4   16.85    3.55
  -3  27   4    5.16    1.95
  -3 -27   4    7.66    3.90
   3 -27  -4    9.64    2.43
  -3  27   3    0.95    0.94
   3  27  -3    3.44    2.50
  -3  27   3   -0.20    1.34
  -3 -27   3    6.55    3.24
   3 -27  -3    5.47    3.45
  -3  27   2    2.21    1.24
  -3  27   2    2.68    1.52
   3  27  -2    7.30    2.82
  -3 -27   2   -1.67    2.51
  -3  27   1    3.39    1.56
  -3  27   1    2.15    1.17
   3  27  -1    4.14    2.37
  -3 -27   1    7.10    3.36
  -3 -27   1    0.64    0.96
  -3  27   0    7.45    2.42
  -3  27   0    2.80    1.04
  -3  27   0    3.03    1.21
   3  27   0    5.89    2.77
  -3 -27   0    6.36    3.40
  -3 -27   0    1.86    1.13
  -3  27  -1  124.14   11.40
  -3  27  -1  193.26   23.83
   3 -27   1  184.00   16.85
  -3 -27  -1  187.65   20.64
  -3 -27  -1  107.91   19.06
   3  27   2   51.37    7.63
  -3  27  -2   21.98    3.58
  -3  27  -2   51.90    7.42
   3 -27   2   50.27    6.01
  -3 -27  -2   29.03    4.85
  -3  27  -3   46.84   10.48
   3  27   3   46.76    7.95
   3 -27   3   16.68    4.73
  -3 -27  -3   21.72    6.17
  -3 -27  -3   12.57    3.86
  -3  27  -4    1.23    4.62
   3  27   4    6.16    2.33
   3 -27   4    2.42    1.40
  -3 -27  -4    4.16    1.85
  -3  27  -5   13.02    4.09
   3  27   5    2.16    1.98
   3 -27   5    9.11    3.26
  -3 -27  -5    1.83    1.53
  -3  27  -6   10.39    4.17
   3  27   6   18.91    5.77
   3 -27   6    4.45    3.25
  -3  27  -7   93.32   31.16
   3  27   7   70.45   18.97
   3 -27   7  111.89   24.54
  -3  27  -8    9.84    4.68
   3  27   8   22.84    5.91
   3 -27   8   13.79    4.62
   3  29  -8    5.55    4.04
  -3 -29   8    6.43    3.50
   3 -29  -8    7.36    3.20
   3  29  -7  190.29   30.85
  -3  29   7   61.79   17.27
  -3 -29   7  108.91   28.38
   3 -29  -7   55.39   20.05
   3  29  -6  209.81   25.51
  -3  29   6   83.86   23.84
  -3 -29   6  179.82   21.07
   3 -29  -6   85.98   16.43
   3  29  -5  216.23   30.62
  -3  29   5   88.44   14.69
  -3 -29   5  172.33   28.12
   3 -29  -5  120.44   12.56
   3  29  -4  670.74   28.20
  -3  29   4  440.62   18.67
  -3 -29   4  605.26   25.76
   3 -29  -4  327.86   18.87
   3  29  -3  525.81   26.54
  -3  29   3  430.08   21.64
  -3 -29   3  622.04   31.37
   3 -29  -3  288.30   15.83
   3  29  -2   12.11    3.71
  -3  29   2    6.75    2.22
  -3 -29   2   13.79    4.11
   3  29  -1  920.82   45.03
  -3  29   1  630.22   30.59
  -3 -29   1  962.66   47.34
   3  29   0  424.37   15.85
  -3  29   0  286.60   10.37
  -3  29   0  482.34   29.71
  -3 -29   0  498.09   20.42
  -3 -29   0  303.20   58.31
  -3  29  -1  684.01   43.92
  -3 -29  -1  706.49   36.52
   3 -29   1  650.40   31.79
  -3 -29  -1  432.49   22.57
  -3  29  -2  611.89   34.20
   3  29   2  411.67   27.35
   3 -29   2  605.89   29.59
  -3 -29  -2  264.49   14.29
  -3  29  -3  639.06   27.27
   3  29   3  476.82   22.81
   3 -29   3  562.71   23.08
  -3 -29  -3  279.57   12.10
  -3  29  -4   10.72    3.52
   3  29   4    4.92    2.90
   3 -29   4    8.91    3.12
  -3 -29  -4    0.95    1.25
  -3  29  -5  597.17   29.29
   3  29   5  451.94   23.23
   3 -29   5  600.75   28.26
  -3  29  -6  458.03   26.63
   3  29   6  374.17   23.85
   3 -29   6  562.71   29.80
  -3  29  -7  153.01   26.97
   3  29   7   75.79   20.61
   3 -29   7  115.20   27.94
   3  29   8    8.93    2.77
  -3  29  -8   45.42    9.62
   3  31  -7    6.99    4.01
  -3 -31   7    2.76    3.46
   3 -31  -7    6.16    3.44
   3  31  -6  337.86   23.82
  -3 -31   6  343.41   23.15
   3 -31  -6  185.92   16.11
   3  31  -5  840.60   44.13
  -3 -31   5  908.64   47.68
   3 -31  -5  438.84   24.06
   3  31  -4  579.70   27.83
  -3 -31   4  587.27   28.45
   3 -31  -4  324.97   18.94
   3  31  -3    6.56    2.96
  -3  31   3    8.60    2.46
  -3 -31   3    6.88    2.88
   3 -31  -3    7.07    3.93
   3  31  -2    4.27    2.08
  -3  31   2    0.05    0.75
  -3 -31   2   -0.13    3.14
   3  31  -1   -1.01    2.11
  -3  31   1   -0.11    0.67
  -3 -31   1    6.20    1.83
  -3  31   0  408.15   20.93
   3  31   0  387.55   17.95
  -3 -31   0  434.51   20.93
  -3  31  -1 1303.73   53.48
   3  31   1  971.84   40.00
  -3 -31  -1 1427.50   57.76
  -3  31  -2  732.56   31.87
   3  31   2  550.77   23.18
   3 -31   2  724.39   28.63
  -3 -31  -2  344.13   14.49
  -3  31  -3    3.45    3.41
   3  31   3    2.11    1.32
   3 -31   3    5.20    2.38
  -3 -31  -3    1.74    1.09
  -3  31  -4   15.35    5.09
   3  31   4   24.49    6.03
   3 -31   4   15.52    2.95
  -3  31  -5   16.67    4.91
   3  31   5   14.58    5.82
   3 -31   5    7.29    2.98
   3  31   6  146.80   27.12
  -3  31  -6  238.64   21.40
   3  31   7  280.87   24.99
  -3  31  -7  344.15   25.35
   3  33  -6  216.67   20.61
  -3 -33   6  138.48   32.44
   3 -33  -6   92.15   20.87
   3  33  -5  116.65   25.80
  -3 -33   5  186.13   28.96
   3 -33  -5   41.71   17.95
   3  33  -4  429.82   23.54
  -3 -33   4  437.01   26.88
   3 -33  -4  254.67   15.85
   3  33  -3    4.79    3.94
  -3 -33   3    3.99    2.90
   3 -33  -3    0.86    1.48
   3  33  -2    5.93    2.99
  -3 -33   2    7.88    3.95
   3  33  -1   16.44    3.81
  -3 -33   1    5.47    2.74
  -3  33   0  161.35   31.16
   3  33   0  207.63   23.74
  -3 -33   0  155.58   28.63
   3  33   1  286.99   15.15
  -3  33  -1  369.98   29.41
   3  33   2  309.60   16.27
  -3  33  -2  411.70   33.45
  -3 -33  -2  161.09   16.93
   3  33   3    3.90    2.62
  -3  33  -3    5.69    2.11
   3  33   4   66.67   12.04
  -3  33  -4   68.53   17.77
   3  33   5   11.86    4.33
  -3  33  -5   18.26    6.80
   3  33   6   33.90   12.35
  -3  33  -6   99.08   18.64
   3  35  -5   51.73   11.92
  -3 -35   5   38.71    4.59
   3 -35  -5   37.88    8.28
   3  35  -4   84.84   14.55
  -3 -35   4   98.64   18.08
   3 -35  -4   38.28    9.59
   3  35  -3  385.61   27.20
  -3 -35   3  438.40   29.26
   3 -35  -3  169.18   25.46
   3  35  -2   43.86   12.65
  -3 -35   2   50.31   14.43
   3  35  -1 1009.52   52.58
  -3 -35   1 1161.35   60.58
   3  35   0   35.36   10.09
  -3 -35   0   36.00   11.33
   3  35   1   91.99   11.84
  -3  35  -1   90.86   19.29
   3  35   2    5.75    3.13
  -3  35  -2   12.46    4.99
   3  35   3  154.31   32.85
  -3  35  -3  302.69   26.35
   3  35   4   46.67   12.23
  -3  35  -4   52.44   14.24
   3  35   5   48.30   13.97
  -3  35  -5   71.54   22.82
   3  37  -4   54.34   17.36
  -3 -37   4  100.40    9.14
   3 -37  -4   25.23    9.53
   3  37  -3  114.45   26.20
  -3 -37   3  113.81   30.47
   3 -37  -3   68.84   17.98
   3  37  -2   18.76    5.73
  -3 -37   2   24.46    6.36
   3  37  -1  296.46   26.41
  -3 -37   1  313.53   28.77
  -3 -37   0   29.70    9.40
   3  37   1    3.12    2.37
  -3  37  -1   11.72    4.10
   3  37   2    5.88    4.39
  -3  37  -2   31.82    5.73
   3  37   3  434.68   33.32
  -3  37  -3  669.78   47.80
  -3 -39   1    1.34    1.80
   3  39   0   57.04   18.65
   3  39   1   32.33    7.00
  -3  39  -1   34.16    9.97
  -4   0  12  188.75   28.06
   4   0 -12  147.03   33.47
  -4   0  11    0.53    2.97
   4   0 -11    7.57    3.20
  -4   0  10   14.65    5.61
   4   0 -10   10.28    5.21
  -4   0   9   10.44    4.59
   4   0  -9    3.61    2.25
  -4   0   8  996.06   38.24
   4   0  -8 1000.74   38.26
  -4   0   7    0.36    2.10
   4   0  -7   -1.60    2.52
  -4   0   6  445.95   12.48
   4   0  -6  313.22    9.59
  -4   0   5    3.07    2.49
   4   0  -5    5.26    2.35
   4   0  -5    3.37    2.45
  -4   0   5    2.39    1.90
  -4   0   4 1498.20   24.43
   4   0  -4 1446.04   23.48
   4   0  -4 1331.18   22.10
  -4   0   4 1183.61   19.68
  -4   0   3    1.23    1.94
   4   0  -3    0.84    1.04
  -4   0   3    1.24    1.50
   4   0  -3    1.97    1.24
  -4   0   2 3307.77   36.68
   4   0  -2 5007.95  228.23
  -4   0   1    3.44    1.93
   4   0  -1    1.32    0.98
   4   0  -1    2.00    1.61
  -4   0   0  326.93    4.75
   4   0   0  378.78    5.10
   4   0   1   -0.84    1.09
  -4   0  -1    2.53    1.11
   4   0   1   -0.04    0.98
   4   0   2   47.70    3.22
   4   0   2   33.55    2.78
  -4   0  -2   21.43    2.53
   4   0   2   43.68    2.90
   4   0   3    3.77    2.26
  -4   0  -3   -0.08    1.70
  -4   0  -3    1.54    0.94
   4   0   3    2.10    0.65
   4   0   4 1254.72   24.07
  -4   0  -4 1176.00   22.07
  -4   0  -4 1346.49   24.76
   4   0   4 1335.21   24.71
   4   0   5    3.12    1.37
  -4   0  -5    2.00    2.52
  -4   0  -5    3.36    2.35
   4   0   5    1.93    1.41
   4   0   6   13.72    3.67
  -4   0  -6    4.69    2.38
   4   0   6    3.83    1.01
   4   0   7    3.55    3.25
  -4   0  -7    2.42    1.02
   4   0   8   16.59    4.61
  -4   0  -8   12.30    3.28
   4   0   9    2.65    2.63
  -4   0  -9    1.07    3.05
   4   0  10  358.80   19.13
  -4   0 -10  365.45   18.67
   4   0  11   12.86    3.69
  -4   0 -11    3.43    2.82
  -4   2  12    3.96    4.09
   4   2 -12    5.72    2.20
   4  -2 -12   11.15    5.60
  -4  -2  12   -1.02    4.54
  -4   2  11  276.29   31.62
   4   2 -11  276.87   63.50
   4  -2 -11  275.67   61.04
  -4  -2  11  289.10   64.31
  -4   2  10  111.05   24.62
   4   2 -10  131.23   27.63
   4  -2 -10  124.33   17.67
  -4  -2  10  126.98   26.07
  -4   2   9  995.87   35.87
   4   2  -9  973.80   35.42
  -4  -2   9  982.66   35.46
   4  -2  -9  930.52   33.61
  -4   2   8   49.72    5.99
   4   2  -8   53.22   10.21
  -4  -2   8   58.37   10.61
   4  -2  -8   50.84    9.80
  -4   2   7    2.59    2.86
   4   2  -7    2.40    2.62
   4  -2  -7    5.51    1.82
  -4  -2   7    8.48    2.40
  -4   2   6   20.75    3.83
   4   2  -6    5.22    2.61
  -4  -2   6   21.12    4.22
   4  -2  -6   30.02    4.49
   4  -2  -6   12.40    2.37
  -4   2   5 1962.81   34.20
  -4   2   5 2754.47   46.96
   4   2  -5 2606.81   44.42
   4  -2  -5 2588.99   44.04
  -4  -2   5 2898.02   49.44
  -4  -2   5 2261.66   38.97
  -4   2   4   16.16    2.49
   4   2  -4   10.79    2.05
   4   2  -4   10.41    1.98
  -4   2   4   14.27    2.93
   4  -2  -4   13.77    1.90
  -4  -2   4   15.18    3.17
  -4  -2   4   11.34    1.88
   4  -2  -4   19.20    2.87
   4   2  -3 3067.54   48.07
  -4   2   3 3362.39   52.09
   4   2  -3 3364.80   52.17
  -4   2   3 2363.98   37.16
  -4  -2   3 3401.62   52.86
  -4  -2   3 2600.31   40.62
   4  -2  -3 2834.96   44.77
   4  -2  -3 3386.56   52.33
  -4   2   2  124.99    7.42
  -4   2   2   88.72    5.41
   4   2  -2  125.58    7.52
   4   2  -2  110.05    6.62
  -4  -2   2  126.80    7.67
  -4  -2   2  106.12    7.17
   4  -2  -2  112.68    9.16
   4  -2  -2  138.23    8.80
  -4   2   1   21.24    2.17
   4   2  -1   32.83    2.57
   4   2  -1   22.10    2.60
  -4  -2   1   33.04    5.05
   4  -2  -1   24.65    1.87
   4  -2  -1   22.26    3.52
  -4  -2   1   27.29    2.68
  -4   2   0   11.96    2.53
   4   2   0    7.81    1.28
   4   2   0    8.99    1.74
   4  -2   0    8.58    1.21
   4  -2   0    9.51    1.91
  -4  -2   0    5.43    1.61
  -4  -2  -1 5558.81  253.33
   4  -2   1 3287.15   36.07
  -4  -2  -1 4061.51   43.81
   4  -2   1 2979.72   32.82
   4   2   2   91.97    6.91
  -4   2  -2   42.81    2.97
   4   2   2   61.54    4.98
  -4   2  -2   64.00    5.22
   4   2   2   79.20    5.14
   4  -2   2   70.31    4.67
  -4  -2  -2   42.23    2.80
   4  -2   2   74.77    4.61
  -4   2  -3  281.15   13.53
  -4   2  -3  274.73   13.10
   4   2   3  277.03   13.45
   4   2   3  311.53   14.56
   4  -2   3  292.94   14.00
   4  -2   3  318.58   15.08
  -4  -2  -3  288.30   13.92
  -4  -2  -3  259.81   12.64
   4   2   4   63.58    6.22
  -4   2  -4   77.18    4.97
   4   2   4   68.13    5.78
  -4   2  -4   69.90    8.49
  -4  -2  -4   65.64    3.83
   4  -2   4   68.29    4.36
  -4  -2  -4   60.13    4.28
   4  -2   4   71.99    7.53
   4   2   5  227.06   14.04
  -4   2  -5  206.98    9.83
  -4   2  -5  247.00   11.34
   4   2   5  219.32    9.86
   4  -2   5  239.56   14.22
  -4  -2  -5  204.65   10.71
  -4  -2  -5  233.16   10.52
   4  -2   5  230.02   10.48
   4   2   6   83.73    9.10
   4   2   6   71.37    4.44
  -4   2  -6   90.40    9.78
  -4  -2  -6   97.48    9.48
   4  -2   6   65.16    7.87
   4  -2   6   89.25   10.86
   4   2   7 1670.78   27.32
   4   2   7 1859.49   31.44
  -4   2  -7 2035.36   35.64
  -4  -2  -7 2002.55   33.73
   4  -2   7 1896.68   32.04
   4   2   8   12.74    6.12
  -4   2  -8    5.83    3.60
   4  -2   8   10.13    2.90
  -4  -2  -8    3.99    3.30
   4   2   9   84.89   15.21
  -4   2  -9   98.97   18.52
  -4  -2  -9   93.27   14.29
   4  -2   9   94.49   10.91
   4   2  10    9.03    4.54
  -4   2 -10    6.89    2.61
  -4  -2 -10   -1.40    3.02
   4  -2  10   -0.86    4.53
   4   2  11   27.24    8.71
   4  -2  11   16.25    5.85
  -4  -2 -11   12.93    5.27
  -4   4  12   34.02   14.45
   4   4 -12   41.31    7.22
   4  -4 -12   39.51   11.16
  -4  -4  12   33.24   11.78
  -4   4  11  203.75   24.28
   4   4 -11  216.15   30.53
   4  -4 -11  197.65   24.35
  -4  -4  11  224.31   26.62
  -4   4  10  102.41   11.76
   4   4 -10  112.76   16.72
   4  -4 -10   82.84   11.22
  -4  -4  10   71.99   19.76
  -4   4   9    8.38    3.67
   4   4  -9   15.09    6.05
  -4  -4   9    6.36    4.73
   4  -4  -9    4.90    3.54
   4   4  -8  131.96   15.65
  -4   4   8  129.24   13.23
  -4  -4   8  134.70   17.05
   4  -4  -8  119.12   14.95
   4   4  -7  980.18   29.75
  -4   4   7 1050.30   31.51
  -4  -4   7 1066.14   32.23
   4  -4  -7  930.96   29.17
  -4   4   6   63.45   10.18
   4   4  -6   66.13   11.02
  -4  -4   6   71.55   10.74
   4  -4  -6   48.10    3.85
   4  -4  -6   52.95   10.16
  -4   4   5  421.33   12.16
   4   4  -5  405.87   10.38
   4   4  -5  376.44    8.50
  -4   4   5  334.43    7.62
  -4  -4   5  433.77   11.91
   4  -4  -5  397.49    8.49
   4  -4  -5  349.53    8.24
  -4  -4   5  338.94    8.08
   4   4  -4   27.56    4.56
  -4   4   4   16.34    1.93
  -4   4   4   33.03    5.10
   4   4  -4   38.30    6.98
  -4  -4   4   28.68    2.95
  -4  -4   4   18.74    1.99
   4  -4  -4   14.54    2.22
   4  -4  -4   24.58    4.07
   4   4  -3  633.86   11.46
  -4   4   3  652.82   11.35
   4   4  -3  671.71   11.78
  -4   4   3  462.87    8.69
  -4  -4   3  675.61   12.16
  -4  -4   3  534.39    9.87
   4  -4  -3  522.52    9.99
   4  -4  -3  663.65   11.28
   4   4  -2  425.30    6.36
  -4   4   2  436.31    6.24
   4   4  -2  423.15    6.30
   4  -4  -2  441.87    6.16
  -4  -4   2  420.89    6.52
  -4  -4   2  350.63    5.33
   4   4  -1 2356.87   26.08
  -4   4   1 2171.49   23.86
   4   4  -1 2474.74   27.87
   4  -4  -1 2733.45   29.83
  -4  -4   1 2248.29   25.62
  -4  -4   1 1991.65   22.20
   4  -4  -1 1764.14   20.55
   4   4   0  167.29    3.45
  -4   4   0  254.33    3.67
   4   4   0  170.53    2.66
  -4   4   0  252.61    4.80
  -4  -4   0  185.45    9.19
   4  -4   0  174.37    2.79
   4  -4   0  236.33    4.18
  -4   4  -1    2.57    1.53
   4   4   1    3.68    0.62
   4   4   1    2.66    1.15
   4  -4   1    4.80    1.39
  -4  -4  -1    3.87    1.84
   4  -4   1    3.01    1.08
   4  -4   1    0.02    1.43
   4   4   2   38.33    5.50
  -4   4  -2   24.18    5.09
  -4   4  -2   32.22    4.59
   4   4   2   31.55    5.25
   4   4   2   24.25    1.78
  -4  -4  -2   18.69    2.02
   4  -4   2   31.27    5.61
   4  -4   2   32.57    4.70
   4   4   3 1024.84   17.24
   4   4   3  691.96   12.54
  -4   4  -3  697.80   11.97
   4   4   3  771.66   12.79
  -4   4  -3  726.56   12.64
   4  -4   3  698.59   12.22
  -4  -4  -3  772.61   12.48
   4  -4   3  840.27   14.16
  -4   4  -4 1088.89   20.98
   4   4   4  986.47   19.26
  -4   4  -4  983.14   18.65
   4   4   4 1016.81   18.81
   4  -4   4 1051.16   20.97
  -4  -4  -4 1126.81   20.68
   4  -4   4 1113.39   20.91
  -4  -4  -4  966.14   18.63
   4   4   5  998.02   26.36
  -4   4  -5  977.79   24.14
  -4   4  -5 1143.45   28.21
   4   4   5 1007.11   24.39
   4  -4   5 1063.21   26.47
  -4  -4  -5 1178.47   28.77
   4  -4   5 1103.34   26.95
   4   4   6   78.37   12.92
  -4   4  -6   76.08    9.65
   4   4   6   56.50    6.45
   4  -4   6   77.22   11.76
  -4  -4  -6   86.66    8.80
   4  -4   6   54.04    6.90
   4   4   7  187.86   14.49
   4   4   7  224.92   19.03
  -4   4  -7  272.42   20.48
  -4  -4  -7  259.59   19.51
   4  -4   7  219.99   18.28
   4   4   8    4.19    3.90
  -4   4  -8    2.87    2.33
   4  -4   8   -1.76    3.30
  -4  -4  -8    1.73    1.64
   4   4   9  262.89   43.72
  -4   4  -9  318.23   14.78
  -4  -4  -9  290.25   13.88
   4  -4   9  270.33   45.50
   4   4  10  136.59   21.90
  -4   4 -10  190.70   21.44
  -4  -4 -10  170.04   18.53
   4  -4  10  141.15   16.29
   4   4  11   71.21   16.88
  -4   4 -11   67.91   19.26
   4  -4  11   41.01   15.96
  -4  -4 -11   72.22   17.04
  -4   6  12   12.58    4.79
   4   6 -12   10.08    5.59
   4  -6 -12    7.55    2.57
  -4  -6  12   15.71    5.92
  -4   6  11   50.48   12.35
   4   6 -11   57.47   12.37
  -4  -6  11   66.20   12.72
   4  -6 -11   37.12   14.00
   4   6 -10  323.76   15.11
  -4   6  10  266.20   26.32
  -4  -6  10  283.89   31.75
   4  -6 -10  269.73   12.82
   4   6  -9   95.34   12.99
  -4   6   9  101.94   12.49
  -4  -6   9  104.54   16.44
   4  -6  -9   90.83   18.45
   4   6  -8   35.47    6.45
  -4   6   8   45.64    7.97
  -4  -6   8   29.34    5.60
   4  -6  -8   30.47    5.89
  -4   6   7   20.63    4.30
   4   6  -7   23.79    4.67
  -4  -6   7   15.99    5.70
   4  -6  -7   26.18    5.12
  -4   6   6    7.19    2.19
   4   6  -6    8.32    3.56
  -4  -6   6   19.58    5.40
   4  -6  -6    3.20    1.21
   4  -6  -6   -4.21    2.84
  -4   6   5  736.69   14.00
  -4   6   5  547.19   11.14
   4   6  -5  716.92   13.86
   4   6  -5  745.21   14.62
  -4  -6   5  765.64   15.18
  -4  -6   5  630.42   12.42
   4  -6  -5  611.79   12.45
   4  -6  -5  699.01   13.31
   4   6  -4  781.09   15.50
  -4   6   4  768.08   14.93
   4   6  -4  777.38   15.30
  -4   6   4  577.39   11.89
  -4  -6   4  823.72   16.45
  -4  -6   4  653.74   13.01
   4  -6  -4  628.57   13.00
   4  -6  -4  759.44   15.07
   4   6  -3   68.89    4.86
   4   6  -3   74.45    6.65
  -4   6   3   60.63    3.56
  -4   6   3   40.49    2.72
  -4  -6   3   74.57    4.91
  -4  -6   3   64.20    7.53
   4  -6  -3   29.31    2.73
   4  -6  -3   61.37    4.85
   4   6  -2   18.90    4.88
   4   6  -2   19.64    2.36
  -4   6   2   23.12    4.20
   4  -6  -2   21.01    2.84
  -4  -6   2   28.60    4.74
  -4  -6   2   10.73    1.58
   4  -6  -2   17.69    3.07
   4   6  -1    1.58    2.85
  -4   6   1    1.75    0.76
   4   6  -1   -0.31    0.98
  -4  -6   1    7.19    2.27
   4  -6  -1    3.15    2.13
   4  -6  -1    2.51    0.95
  -4  -6   1    2.35    1.52
   4   6   0  738.54    8.47
   4   6   0  596.03    8.52
  -4   6   0  855.22   11.06
   4  -6   0  825.27   11.33
   4  -6   0  745.72    8.55
   4   6   1  733.69    9.91
  -4  -6  -1  797.72   11.07
   4  -6   1  819.94    9.58
   4  -6   1  695.93    8.36
   4  -6   1  523.66    7.47
   4   6   2  502.85    9.25
   4   6   2  374.63    7.89
  -4   6  -2  343.86   16.14
   4   6   2  395.03    6.34
  -4   6  -2  296.35   14.17
   4  -6   2  413.75    7.29
   4  -6   2  366.23   17.27
  -4  -6  -2  363.12    5.84
   4   6   3  412.05   19.47
   4   6   3  273.15   13.37
  -4   6  -3  251.46   12.03
   4   6   3  279.21   12.97
  -4   6  -3  293.83   14.37
   4  -6   3  292.81   13.99
  -4  -6  -3  292.89   13.62
   4  -6   3  316.56   15.05
  -4   6  -4   97.30    5.70
  -4   6  -4  102.38    6.87
   4   6   4  104.25    6.61
   4   6   4   92.11    4.73
   4  -6   4  116.61    8.10
   4  -6   4  121.07   10.13
  -4  -6  -4  106.72    5.43
  -4  -6  -4   87.67    5.08
  -4   6  -5   31.27    6.02
   4   6   5   17.38    3.26
  -4   6  -5   13.37    2.23
   4   6   5   19.00    3.11
  -4  -6  -5   20.21    2.12
   4  -6   5   24.67    3.85
   4  -6   5   30.26    5.54
   4   6   6  620.50   18.59
   4   6   6  622.82   20.77
  -4   6  -6  752.53   23.14
  -4  -6  -6  735.59   23.11
   4  -6   6  700.10   22.01
   4   6   7  230.66   17.21
   4   6   7  274.33   20.97
  -4   6  -7  251.94   19.08
  -4  -6  -7  284.67   21.48
   4  -6   7  254.78   19.61
   4   6   8   77.53   14.20
  -4   6  -8   83.46   11.01
   4  -6   8   61.89    8.77
  -4  -6  -8   65.82    7.97
   4   6   9   37.45    8.51
  -4   6  -9   34.07    4.14
   4  -6   9   35.45    4.26
  -4  -6  -9   32.20    7.70
   4   6  10   15.62    5.33
  -4   6 -10   11.07    3.73
  -4  -6 -10   10.38    4.40
   4  -6  10   16.61    6.69
   4   6  11   18.56    7.10
  -4   6 -11    5.10    3.69
  -4  -6 -11    3.41    2.68
   4  -6  11    1.75    3.35
  -4   8  12   -0.65    2.99
   4   8 -12    6.79    3.03
  -4  -8  12    8.61    2.42
   4  -8 -12    3.49    2.86
  -4   8  11    0.73    4.00
   4   8 -11    9.11    3.35
   4  -8 -11    0.71    3.73
  -4  -8  11   12.22    2.74
  -4   8  10   93.77   13.67
   4   8 -10   63.51   17.61
  -4  -8  10   71.24   16.74
   4  -8 -10   87.03   15.40
  -4   8   9    2.83    5.08
   4   8  -9   14.52    5.84
  -4  -8   9    8.04    2.66
   4  -8  -9   16.45    4.89
   4   8  -8  123.38   21.81
  -4   8   8  120.55   27.59
  -4  -8   8  132.03   31.90
   4  -8  -8  124.77   12.24
  -4   8   7 1635.81   27.90
   4   8  -7 1792.87   30.42
   4  -8  -7 1438.63   28.79
  -4   8   6    7.57    2.27
   4   8  -6    0.88    2.92
  -4  -8   6    6.89    3.09
   4  -8  -6    8.07    1.66
   4  -8  -6   -2.98    2.49
   4   8  -5  123.48    7.01
   4   8  -5  111.86    9.63
  -4   8   5  123.12    9.13
  -4   8   5   83.53    4.71
  -4  -8   5  106.85    6.91
  -4  -8   5  119.76   10.42
   4  -8  -5  116.28   11.59
   4  -8  -5  114.29    5.76
   4   8  -4  571.14   11.98
  -4   8   4  556.55   11.62
   4   8  -4  550.63   11.54
  -4   8   4  394.30    9.75
  -4  -8   4  532.31   11.48
  -4  -8   4  482.32   10.14
   4  -8  -4  449.81   10.51
   4  -8  -4  562.71   11.14
   4   8  -3  597.51   10.80
  -4   8   3  554.04   10.23
   4   8  -3  579.06   11.32
   4  -8  -3  554.21    9.55
  -4  -8   3  589.30   11.22
  -4  -8   3  526.65    9.57
   4  -8  -3  448.10    9.03
   4   8  -2    4.82    1.64
  -4   8   2    2.60    1.22
   4   8  -2    1.30    1.44
  -4  -8   2    3.52    1.32
   4  -8  -2    0.62    0.74
  -4  -8   2    0.84    1.23
   4  -8  -2    2.63    2.46
   4   8  -1 4351.61   47.35
  -4   8   1 3477.97   37.26
   4   8  -1 3306.41   37.07
   4  -8  -1 3573.13   38.28
  -4  -8   1 3442.95   38.65
  -4  -8   1 3514.94   38.29
   4   8   0   59.25    3.82
   4   8   0   49.24    3.61
  -4   8   0   61.54    5.68
  -4  -8   0   47.35    3.92
   4  -8   0   66.42    5.72
   4  -8   0   60.31    3.92
   4  -8   0   56.27    3.29
  -4  -8   0   51.01    4.08
   4   8   1    2.31    1.73
  -4   8  -1    3.72    1.34
  -4  -8  -1    6.00    1.97
   4  -8   1    0.96    0.44
   4  -8   1    3.54    2.46
   4   8   2  745.84   13.04
  -4   8  -2  492.55    9.69
   4  -8   2  522.64    9.73
   4   8   3 2491.91   44.98
   4   8   3 1692.03   31.27
  -4   8  -3 1818.82   32.70
   4   8   3 1530.78   27.08
  -4   8  -3 1825.24   33.88
   4  -8   3 1984.56   36.33
   4  -8   3 1972.63   35.96
  -4  -8  -3 2014.78   35.50
   4   8   4  101.50   10.55
  -4   8  -4   72.59    3.89
   4   8   4   77.90    5.03
   4   8   4   66.29    3.62
  -4   8  -4   83.11    5.40
   4  -8   4   88.01    5.41
   4  -8   4   92.76    5.17
  -4  -8  -4   86.20    4.35
  -4   8  -5 1444.53   34.84
   4   8   5 1515.32   37.18
   4   8   5 1345.56   32.08
  -4   8  -5 1700.01   41.18
   4  -8   5 1590.45   38.46
   4  -8   5 1596.74   38.63
  -4  -8  -5 1701.49   40.76
   4   8   6  128.74    8.66
   4   8   6  181.00   13.35
  -4   8  -6  181.25   15.02
  -4  -8  -6  172.14   14.05
   4  -8   6  161.07   12.28
   4   8   7   10.51    2.50
   4   8   7   17.94    4.81
  -4   8  -7   28.34    5.25
  -4  -8  -7   30.33    4.95
   4  -8   7   23.92    5.05
   4   8   8  111.82   18.11
  -4   8  -8  106.23   14.20
   4  -8   8   92.67   23.56
  -4  -8  -8   86.94   11.78
  -4   8  -9  840.89   36.02
   4   8   9  661.49   30.67
   4  -8   9  749.29   31.46
  -4  -8  -9  754.20   31.01
   4   8  10   41.80    6.51
  -4   8 -10   -2.98    3.72
  -4  -8 -10    3.77    2.84
   4  -8  10    2.09    3.66
   4   8  11  309.98   23.89
  -4   8 -11  395.65   28.42
  -4  -8 -11  335.73   23.60
   4  -8  11  332.47   24.04
   4  10 -11   44.21   15.54
  -4  10  11   28.11   12.46
  -4 -10  11   74.89   13.96
   4 -10 -11   44.68   16.18
   4  10 -10  349.10   18.13
  -4  10  10  316.72   16.97
  -4 -10  10  365.00   19.03
   4 -10 -10  272.79   16.50
   4  10  -9  311.72   14.43
  -4  10   9  268.54   12.74
  -4 -10   9  315.58   15.17
   4 -10  -9  270.71   21.31
   4  10  -8  116.05   19.35
  -4  10   8  110.68   20.21
  -4 -10   8  103.24   19.34
   4 -10  -8   70.22   13.69
   4  10  -7  101.76    9.72
  -4  10   7  114.63   11.61
  -4 -10   7  114.07   16.39
   4 -10  -7   88.63   12.96
  -4  10   6   59.12    5.32
   4  10  -6   69.78    9.03
  -4 -10   6   83.20   12.12
   4 -10  -6   41.57    9.18
   4 -10  -6   57.51    5.33
  -4  10   5  462.79   12.41
   4  10  -5  538.96   14.40
  -4 -10   5  528.70   16.03
   4 -10  -5  510.64   13.34
  -4 -10   5  394.94   12.01
   4 -10  -5  390.92   13.41
   4  10  -4  489.73   13.07
   4  10  -4  463.70   11.18
  -4  10   4  435.90    8.86
   4 -10  -4  427.67    8.57
  -4 -10   4  513.74   11.09
  -4 -10   4  445.12    9.19
   4 -10  -4  337.31    7.76
   4  10  -3 1253.25   23.35
   4  10  -3 1092.32   20.68
  -4  10   3 1076.57   19.90
   4 -10  -3 1060.03   19.49
  -4 -10   3 1208.28   22.97
  -4 -10   3 1035.55   19.51
   4 -10  -3  730.18   15.04
  -4  10   2  215.37   10.10
   4  10  -2  198.49    9.86
   4  10  -2  234.61   11.28
  -4 -10   2  242.44   12.08
   4 -10  -2  324.01   18.29
   4 -10  -2  247.63   11.60
  -4 -10   2  213.82   10.44
   4 -10  -2  161.93    9.06
   4  10  -1  620.71   10.35
   4  10  -1  471.20    8.97
   4 -10  -1  559.96    8.71
   4 -10  -1  667.50   11.82
  -4 -10   1  500.97    9.85
  -4 -10   1  489.48    8.34
   4  10   0  132.88    6.41
   4  10   0   99.44    6.47
  -4  10   0  108.02    6.62
   4 -10   0  113.55    6.07
  -4 -10   0  111.34    6.37
  -4 -10   0   99.80    4.87
   4  10   1 1576.83   25.49
  -4 -10  -1 1593.07   26.18
   4 -10   1 1437.53   23.43
   4  10   2  879.40   15.86
  -4  10  -2  651.05   10.68
   4  10   2  604.00   11.64
  -4  10  -2  621.99   11.63
   4  10   3  738.01   14.74
   4  10   3  522.27   11.31
  -4  10  -3  515.85   11.12
  -4  10  -3  522.14   11.26
   4 -10   3  598.60   11.78
  -4 -10  -3  600.85   10.82
   4 -10   3  546.02   11.45
   4  10   4 1002.45   18.47
  -4  10  -4  807.58   14.80
   4  10   4  797.72   15.83
   4  10   4  667.21   11.68
  -4  10  -4  964.72   19.53
   4 -10   4  968.35   17.64
  -4 -10  -4  945.45   16.20
   4 -10   4  936.96   17.57
   4  10   5   32.16    5.72
  -4  10  -5   29.50    3.22
  -4  10  -5   32.53    6.27
   4  10   5   22.34    2.15
   4 -10   5   39.90    5.35
  -4 -10  -5   34.43    4.01
   4  10   6   73.03    6.86
   4  10   6  141.73   16.87
  -4  10  -6  111.62    9.42
  -4 -10  -6  112.76    9.63
   4 -10   6  134.94   15.79
   4  10   7  121.94   11.67
   4  10   7  168.24   16.57
  -4  10  -7  229.66   29.71
  -4 -10  -7  165.46   19.09
   4 -10   7  181.92   20.28
  -4  10  -8  115.68   11.88
   4  10   8  114.23   18.63
   4 -10   8   99.86   17.85
  -4 -10  -8   95.08   13.11
   4  10   9  126.96   17.60
  -4  10  -9  145.92   19.34
   4 -10   9  135.19   23.95
  -4 -10  -9  146.28   18.41
   4  10  10   99.17   30.65
  -4  10 -10  157.66   19.53
  -4 -10 -10  154.36   18.14
   4 -10  10   76.46   25.95
   4  10  11   55.69   11.61
  -4  10 -11   33.83   15.83
   4 -10  11   60.14   14.34
  -4 -10 -11   35.91   12.10
  -4  12  11   16.29    6.98
   4  12 -11   30.27    7.42
  -4 -12  11   13.90    4.79
   4 -12 -11   13.73    4.13
   4  12 -10  169.05   18.65
  -4  12  10  126.13   16.02
  -4 -12  10  157.03   22.99
   4 -12 -10  130.12   19.35
   4  12  -9   -0.52    3.38
  -4  12   9    3.67    3.13
  -4 -12   9   10.51    4.20
   4 -12  -9    1.95    2.86
   4  12  -8  242.69   29.17
  -4  12   8  186.49   21.96
  -4 -12   8  239.67   24.37
   4 -12  -8  176.85   20.82
   4  12  -7 1535.58   58.53
  -4  12   7 1285.70   50.09
  -4 -12   7 1574.54   59.37
   4 -12  -7 1175.54   46.39
  -4  12   6  269.86   21.66
   4  12  -6  270.75   20.27
  -4 -12   6  292.67   20.69
   4 -12  -6  228.61   15.15
   4 -12  -6  252.07   20.06
  -4  12   5    2.13    1.70
   4  12  -5    4.13    2.12
  -4 -12   5    9.25    4.06
   4 -12  -5    4.39    1.66
   4 -12  -5    9.21    2.94
   4  12  -4  386.80    8.75
   4  12  -4  316.06   19.01
  -4  12   4  317.53    6.80
   4 -12  -4  327.37   19.26
  -4 -12   4  388.54    9.31
  -4 -12   4  310.08    8.62
   4 -12  -4  255.31   11.92
   4  12  -3   71.16    4.85
   4  12  -3   65.43    7.89
  -4  12   3   59.43    4.95
   4 -12  -3   58.30    5.40
  -4 -12   3   77.71    7.78
  -4 -12   3   59.43    4.20
   4 -12  -3   49.61    6.50
  -4  12   2  584.95   10.76
   4  12  -2  553.49   11.41
   4  12  -2  692.23   14.11
  -4 -12   2  655.58   13.77
   4 -12  -2  768.94   15.16
   4 -12  -2  628.32   11.62
  -4 -12   2  577.82   11.31
   4  12  -1  312.02   14.98
   4  12  -1  423.01   19.66
  -4 -12   1  324.49   15.73
   4 -12  -1  403.01   19.12
  -4 -12   1  331.78   15.99
   4  12   0  681.57   10.99
   4  12   0  562.68   10.46
  -4 -12   0  618.89   11.69
   4 -12   0  575.97   10.75
  -4 -12   0  569.48    9.34
  -4  12  -1   18.07    2.50
   4  12   1   23.12    2.29
  -4  12  -1   25.87    2.23
   4 -12   1   38.10    3.15
  -4 -12  -1   25.11    3.72
   4 -12   1   22.11    2.51
  -4 -12  -1   25.20    1.82
   4  12   2  435.61    9.52
   4  12   2  293.61    7.82
  -4  12  -2  349.48    6.84
  -4  12  -2  341.19    8.29
   4 -12   2  423.30    8.27
   4 -12   2  323.87    7.62
   4  12   3  601.90   11.97
  -4  12  -3  422.70    9.58
  -4  12  -3  463.56    8.80
   4  12   3  407.79    9.41
  -4 -12  -3  590.48   10.01
   4 -12   3  518.82   11.03
   4 -12   3  456.55    9.87
  -4 -12  -3  511.42    8.78
   4  12   4  264.89    8.64
  -4  12  -4  302.31   11.31
  -4  12  -4  308.21    9.37
   4 -12   4  337.66    9.44
  -4 -12  -4  301.91    7.61
   4  12   5  557.19   16.86
  -4  12  -5  575.96   15.08
  -4  12  -5  685.23   18.47
   4  12   5  442.13   11.27
   4 -12   5  673.73   17.71
  -4 -12  -5  642.27   15.97
   4  12   6   61.75    4.97
   4  12   6   99.19   10.24
  -4  12  -6  108.40   10.89
  -4 -12  -6   90.89    8.41
   4 -12   6  104.87   12.09
   4  12   7   15.95    4.49
   4  12   7   36.12    7.76
  -4  12  -7   35.74    7.10
  -4 -12  -7   34.13    6.98
   4 -12   7   34.33    6.38
  -4  12  -8   91.66   19.63
   4  12   8   64.63    7.68
   4 -12   8   74.62   14.37
  -4 -12  -8   78.21   12.17
  -4  12  -9  323.94   31.22
   4  12   9  240.39   23.65
   4 -12   9  260.88   25.16
  -4 -12  -9  274.74   26.52
   4  12  10   15.63    5.74
  -4  12 -10   11.37    4.57
   4 -12  10   15.92    4.89
  -4 -12 -10    7.43    4.12
  -4  12 -11   21.94    5.53
   4  12  11   24.76    4.94
   4 -12  11   14.38    6.55
   4  14 -11  196.31   18.46
  -4  14  11  179.54   14.06
  -4 -14  11  169.77   28.37
   4 -14 -11  168.89   13.35
   4  14 -10   85.67   16.93
  -4  14  10   79.30   17.52
  -4 -14  10   74.87   18.42
   4 -14 -10   63.13   13.85
   4  14  -9   89.61   18.64
  -4  14   9   76.54    9.16
  -4 -14   9   89.39   14.24
   4 -14  -9   74.73   13.82
   4  14  -8  382.86   49.81
  -4  14   8  299.37   25.49
  -4 -14   8  384.63   20.53
   4 -14  -8  292.67   20.39
   4  14  -7  443.57   18.44
  -4  14   7  353.00   77.27
  -4 -14   7  427.89   93.89
   4 -14  -7  312.39   14.08
  -4  14   6  865.13   16.83
   4  14  -6 1089.19   19.90
  -4 -14   6 1109.52   20.40
   4 -14  -6  871.84   15.55
   4 -14  -6  813.42   16.63
  -4  14   5 2041.50   49.45
   4  14  -5 2571.79   62.50
  -4 -14   5 2574.01   62.76
   4 -14  -5 2089.58   50.53
   4 -14  -5 1729.36   42.83
  -4  14   4   99.18    8.35
   4  14  -4  128.87   12.53
  -4 -14   4  136.15   14.21
   4 -14  -4   86.37    8.34
  -4 -14   4   79.07    8.70
   4 -14  -4   86.84    9.81
  -4  14   3  589.83   11.25
   4  14  -3  614.65   12.23
   4  14  -3  758.16   14.35
  -4 -14   3  718.38   14.52
   4 -14  -3  845.84   17.24
   4 -14  -3  678.01   12.23
  -4 -14   3  616.10   11.78
   4 -14  -3  445.71   14.44
  -4  14   2 1967.72   34.74
  -4  14   2 1256.67   22.37
   4  14  -2 1236.25   23.33
   4  14  -2 1629.04   29.75
  -4 -14   2 1401.76   26.55
   4 -14  -2 1689.96   31.27
   4 -14  -2 1474.79   26.25
  -4 -14   2 1393.76   25.65
   4  14  -1  213.22   11.01
   4  14  -1  254.38   12.17
  -4 -14   1  204.80   10.44
   4 -14  -1  236.65   16.18
  -4 -14   1  209.88   10.06
  -4  14   0    4.05    1.28
   4  14   0    7.77    2.08
   4  14   0    9.25    1.21
  -4 -14   0   -0.03    2.37
   4 -14   0    7.65    2.50
  -4 -14   0    2.58    0.69
  -4  14  -1 1992.14   36.91
   4  14   1 2122.86   38.65
  -4  14  -1 1673.13   29.31
   4 -14   1 2581.69   45.23
  -4 -14  -1 2220.21   41.01
   4 -14   1 2192.75   39.95
  -4 -14  -1 2266.35   39.80
   4  14   2   50.16    6.56
   4  14   2   31.65    4.13
  -4  14  -2   38.22    2.23
  -4  14  -2   41.12    3.66
   4 -14   2   47.08    4.30
   4 -14   2   32.73    4.09
  -4 -14  -2   37.36    2.07
   4  14   3 1170.39   28.75
  -4  14  -3  784.36   20.15
  -4  14  -3  899.01   21.65
   4  14   3  755.04   20.53
  -4 -14  -3  847.74   19.94
   4 -14   3 1088.50   26.19
  -4 -14  -3  963.67   22.65
  -4  14  -4 1627.14   40.39
  -4  14  -4 1526.06   37.05
   4  14   4 1459.87   37.10
  -4 -14  -4 2195.73   52.28
   4 -14   4 1855.26   44.95
  -4 -14  -4 1744.55   41.65
   4  14   5  166.26   16.57
  -4  14  -5  165.24   14.70
  -4  14  -5  193.70   13.41
   4 -14   5  204.14   15.18
  -4 -14  -5  187.44   14.32
   4  14   6    0.13    0.79
   4  14   6   -0.80    2.98
  -4  14  -6    6.95    3.83
  -4 -14  -6    0.68    1.09
   4 -14   6   -1.81    2.18
   4  14   7  399.23   14.40
   4  14   7  586.12   22.19
  -4  14  -7  728.33   27.00
  -4 -14  -7  674.88   24.23
   4 -14   7  719.00   25.99
  -4  14  -8    3.96    5.13
   4  14   8    1.34    1.54
   4 -14   8    5.39    3.40
  -4  14  -9  108.49   23.66
   4  14   9  103.84   22.30
   4 -14   9  106.95   19.26
  -4 -14  -9   90.41   15.67
  -4  14 -10  146.07   28.88
   4  14  10   82.42   27.59
   4 -14  10  169.58   26.57
   4  16 -11    6.42    3.25
  -4  16  11    3.43    4.32
  -4 -16  11    5.38    3.23
   4 -16 -11    1.40    2.10
   4  16 -10   20.87    6.04
  -4  16  10   16.10    5.56
  -4 -16  10   14.61    6.02
   4 -16 -10    4.46    3.45
   4  16  -9   55.21    8.23
  -4  16   9   46.61    9.18
  -4 -16   9   74.60   11.40
   4 -16  -9   53.07    9.35
   4  16  -8   92.65   10.15
  -4  16   8   69.90   10.31
  -4 -16   8   79.98   10.40
   4 -16  -8   55.69    9.45
   4  16  -7   32.77    7.81
  -4  16   7   20.07    5.20
  -4 -16   7   24.18    7.12
   4 -16  -7   22.36    5.44
  -4  16   6  116.01   16.67
   4  16  -6  137.71   16.20
  -4 -16   6  141.42   14.64
   4 -16  -6   61.09   11.43
   4 -16  -6   82.76   11.86
  -4  16   5  365.24   11.68
   4  16  -5  499.09   16.04
  -4 -16   5  512.09   19.08
   4 -16  -5  459.96   15.73
   4 -16  -5  333.01   15.28
  -4  16   4  174.71    9.97
   4  16  -4  222.53   12.15
  -4 -16   4  211.92   12.00
   4 -16  -4  183.88    9.83
  -4 -16   4  155.30   15.97
   4 -16  -4  134.47    8.29
  -4  16   3   99.74    7.58
   4  16  -3   96.81   10.17
   4  16  -3  115.23    7.53
  -4 -16   3  139.20   13.42
   4 -16  -3  120.18   11.31
   4 -16  -3   98.44    7.60
  -4 -16   3   91.07   10.17
   4 -16  -3   76.00    6.33
  -4  16   2 2079.37   34.59
   4  16  -2 1898.58   32.57
   4  16  -2 1419.53   25.29
  -4  16   2 1377.76   23.13
   4 -16  -2 1946.25   33.87
  -4 -16   2 1610.18   28.75
  -4 -16   2 1628.16   28.03
   4  16  -1  187.36   14.83
   4  16  -1  200.69    9.46
  -4 -16   1  202.28   11.68
   4 -16  -1  166.26    9.35
  -4 -16   1  168.74    7.64
   4  16   0   93.40    5.91
   4  16   0  113.95    8.17
  -4  16   0   95.62   11.67
   4 -16   0   88.58   10.19
  -4 -16   0  128.59   13.38
  -4 -16   0   97.38    4.98
  -4  16  -1  932.51   17.81
   4  16   1  780.73   15.56
  -4  16  -1  697.41   11.61
   4 -16   1  902.18   15.13
  -4 -16  -1  901.11   17.31
   4 -16   1  852.37   16.12
  -4 -16  -1  880.49   15.08
   4  16   2   32.33    4.32
   4  16   2   28.17    3.67
  -4  16  -2   26.52    2.65
  -4  16  -2   27.25    3.71
   4 -16   2   32.58    4.15
  -4 -16  -2   24.75    2.70
  -4 -16  -2   21.86    2.55
  -4  16  -3    1.44    2.56
  -4  16  -3    0.08    0.79
   4  16   3    6.07    2.57
  -4 -16  -3    2.19    0.78
   4 -16   3    2.80    1.18
  -4 -16  -3    1.24    0.52
  -4  16  -4  683.77   21.38
  -4  16  -4  609.37   19.31
   4  16   4  614.94   20.26
  -4 -16  -4  827.62   23.86
   4 -16   4  784.31   23.39
  -4 -16  -4  688.05   20.06
   4  16   5   59.93   10.63
  -4  16  -5   42.60    9.67
  -4  16  -5   88.01   13.55
   4 -16   5   81.30   13.06
  -4 -16  -5   75.54    8.93
  -4  16  -6   35.41    7.82
   4  16   6   31.52    7.55
   4 -16   6   19.33    6.35
  -4 -16  -6   20.36    4.66
  -4  16  -7  218.65   21.34
   4  16   7  158.78   22.85
   4 -16   7  199.74   13.70
  -4 -16  -7  170.17   16.16
  -4  16  -8    9.27    4.94
   4  16   8    9.40    4.69
   4 -16   8    4.81    3.75
  -4 -16  -8    3.40    1.30
  -4  16  -9    6.49    3.00
   4  16   9    8.01    3.35
   4 -16   9    8.86    4.76
  -4 -16  -9    5.19    2.78
  -4  16 -10  103.29   35.78
   4  16  10  106.34   17.32
   4 -16  10   65.20   25.68
   4  18 -11   94.54   27.02
  -4  18  11   40.68   17.62
  -4 -18  11  115.19   14.64
   4 -18 -11   49.88   18.83
   4  18 -10   -0.30    3.80
  -4  18  10    3.77    3.60
  -4 -18  10    0.43    3.89
   4 -18 -10    4.17    3.56
   4  18  -9  313.10   17.54
  -4  18   9  261.05   15.25
  -4 -18   9  342.99   18.23
   4 -18  -9  230.43   26.17
   4  18  -8  249.63   29.03
  -4  18   8  167.98   21.12
  -4 -18   8  277.66   24.29
   4 -18  -8  176.63   20.28
   4  18  -7    3.68    3.75
  -4  18   7    7.03    3.61
  -4 -18   7   23.77    7.94
   4 -18  -7    3.31    2.38
  -4  18   6   75.87   13.81
   4  18  -6   92.22   20.25
  -4 -18   6  102.74   21.53
   4 -18  -6   39.67    9.86
   4 -18  -6   54.88   10.33
  -4  18   5  709.83   12.87
   4  18  -5  962.58   19.93
  -4 -18   5  946.79   17.87
   4 -18  -5  754.73   13.47
   4 -18  -5  582.82   12.31
  -4  18   4   65.25    6.53
   4  18  -4   64.29   10.74
  -4 -18   4   53.94    7.98
   4 -18  -4   93.26    8.21
   4 -18  -4   40.52    6.14
  -4  18   3  333.46   16.98
   4  18  -3  303.42   16.07
  -4  18   3  209.27   12.89
  -4 -18   3  279.11   16.74
  -4 -18   3  226.63   13.86
   4 -18  -3  175.55   14.79
  -4  18   2  477.32   11.79
  -4  18   2  578.55   13.93
   4  18  -2  652.66   16.47
  -4 -18   2  507.06   14.14
  -4 -18   2  533.41   14.04
   4  18  -1    1.32    1.66
   4  18  -1    2.78    1.81
  -4 -18   1    0.10    1.63
   4 -18  -1    0.27    1.88
  -4 -18   1    3.06    1.95
  -4  18   0  419.92   14.47
   4  18   0  389.04   10.80
   4  18   0  399.44   10.23
  -4 -18   0  462.30   12.85
  -4 -18   0  372.36    9.48
   4  18   1  847.41   21.30
   4  18   2  139.77    8.45
  -4  18  -2  194.33   11.06
  -4  18  -2  224.81   13.47
   4 -18   2  241.07   13.01
  -4 -18  -2  178.33    9.38
  -4 -18  -2  142.56    7.49
  -4  18  -3   19.13    4.37
  -4  18  -3    8.68    1.59
   4  18   3   12.35    3.18
  -4 -18  -3    9.70    1.59
   4 -18   3   12.59    2.93
  -4 -18  -3    7.80    1.51
   4  18   4  325.94   13.66
  -4  18  -4  374.65    8.68
  -4  18  -4  373.97    9.50
   4 -18   4  479.06   10.34
  -4 -18  -4  409.53    7.02
  -4 -18  -4  388.85    8.47
  -4  18  -5  265.29   17.60
  -4  18  -5  204.87   20.08
   4  18   5  209.52   10.18
  -4 -18  -5  318.30   62.35
   4 -18   5  284.06   11.78
  -4 -18  -5  234.46   22.59
  -4  18  -6  207.93   25.10
   4  18   6  178.04   17.91
   4 -18   6  228.67   22.25
  -4 -18  -6  186.25   17.81
  -4  18  -7  554.20   30.66
   4  18   7  416.96   21.89
   4 -18   7  560.11   28.05
  -4 -18  -7  500.83   24.63
  -4  18  -8   37.96    8.96
   4  18   8   42.84    6.45
   4 -18   8   63.85    6.53
  -4 -18  -8   37.53    5.67
  -4  18  -9    8.33    3.93
   4  18   9    7.07    4.69
   4 -18   9    4.27    3.47
  -4  18 -10   72.35   25.57
   4  18  10   62.17   17.70
   4 -18  10   40.04   17.71
   4  20 -10  490.97   41.51
  -4  20  10  305.79   26.74
  -4 -20  10  452.71   38.27
   4 -20 -10  355.79   30.39
   4  20  -9  184.09   28.48
  -4  20   9  105.42   23.46
  -4 -20   9  149.14   26.89
   4 -20  -9  125.34   20.69
   4  20  -8   23.79    4.84
  -4  20   8   10.96    4.96
  -4 -20   8   14.38    6.13
   4 -20  -8   13.38    5.24
   4  20  -7  128.46   14.90
  -4  20   7   82.08   13.14
  -4 -20   7  114.07   20.39
   4 -20  -7   79.62   11.82
  -4  20   6   42.85    7.15
   4  20  -6   49.69   11.58
  -4 -20   6   66.41   11.93
   4 -20  -6   26.11    4.97
   4 -20  -6   30.50    4.64
  -4  20   5  289.49   14.72
   4  20  -5  380.81   16.92
  -4 -20   5  374.88   16.56
   4 -20  -5  316.50   12.73
   4 -20  -5  218.15   10.39
  -4  20   4 1336.54   21.60
   4  20  -4 1193.51   20.82
  -4  20   4  792.72   14.34
  -4 -20   4 1101.99   20.29
   4 -20  -4  624.84   12.87
  -4  20   3  575.10   17.20
   4  20  -3  565.19   17.74
  -4  20   3  381.89   11.53
  -4 -20   3  516.48   18.56
  -4 -20   3  450.21   14.07
   4 -20  -3  268.80   10.98
  -4  20   2  185.22   10.11
   4  20  -2  204.96   11.08
  -4  20   2  157.25    8.65
  -4 -20   2  181.05   10.54
  -4 -20   2  147.36    8.90
   4  20  -1   55.14    4.72
  -4  20   1   42.67    3.55
  -4 -20   1   64.39    9.25
  -4 -20   1   38.25    5.53
  -4  20   0  369.27   21.35
   4  20   0  404.54   20.56
  -4 -20   0  444.26   25.62
  -4 -20   0  351.34   17.98
  -4  20  -1 1026.83   27.50
   4 -20   1 1059.75   25.37
  -4 -20  -1 1026.75   26.31
  -4 -20  -1  794.21   19.45
   4  20   2  924.64   28.92
  -4  20  -2  977.69   28.11
  -4  20  -2 1026.90   30.89
   4 -20   2 1256.94   36.16
  -4 -20  -2  964.99   27.78
  -4 -20  -2  728.98   21.15
   4  20   3  329.45   21.11
  -4  20  -3  331.11   12.81
  -4  20  -3  428.62   14.50
   4 -20   3  472.16   14.44
  -4 -20  -3  401.74   11.88
  -4 -20  -3  300.10    9.42
  -4  20  -4  139.28   15.47
  -4  20  -4  103.12    9.89
   4  20   4   83.79    9.27
  -4 -20  -4  115.93   10.81
   4 -20   4  137.77   15.74
  -4 -20  -4   98.17   10.65
  -4  20  -5  126.25   29.37
  -4  20  -5   70.14   15.00
   4  20   5   96.20   19.57
  -4 -20  -5  119.08   19.29
   4 -20   5  148.03   14.87
  -4 -20  -5  124.04   11.16
  -4  20  -6  349.73   18.85
   4  20   6  246.16   17.32
   4 -20   6  349.34   22.66
  -4 -20  -6  300.93   19.07
  -4  20  -7  260.60   27.45
   4  20   7  235.55   20.81
   4 -20   7  292.14   13.51
  -4 -20  -7  252.20   41.62
  -4  20  -8  248.99   32.55
   4  20   8  216.33   12.82
   4 -20   8  273.43   29.54
  -4  20  -9  125.29   31.07
   4  20   9   89.57   26.86
   4 -20   9  167.96   25.45
  -4  20 -10   16.07    7.57
   4  22 -10   51.00   13.04
  -4  22  10   21.29    9.05
  -4 -22  10   43.14    7.96
   4 -22 -10   23.38    8.80
   4  22  -9   21.70    4.85
  -4  22   9   16.34    4.50
  -4 -22   9   17.13    7.00
   4 -22  -9   12.11    5.36
   4  22  -8   34.38    7.36
  -4  22   8   24.00    4.81
  -4 -22   8   46.87    8.00
   4 -22  -8   27.83    5.73
   4  22  -7  532.35   23.09
  -4  22   7  341.35   15.20
  -4 -22   7  533.31   23.45
   4 -22  -7  337.55   20.32
   4  22  -6    6.13    2.32
  -4  22   6    6.50    3.23
  -4 -22   6   -0.71    3.40
   4 -22  -6    7.05    4.77
  -4  22   5  191.25   16.50
   4  22  -5  214.43   20.36
  -4  22   5  119.72   13.41
  -4 -22   5  169.36   20.19
   4 -22  -5  111.87    9.97
  -4  22   4  301.43   28.53
   4  22  -4  302.94   14.70
  -4  22   4  199.02   20.52
  -4 -22   4  267.26   52.73
   4 -22  -4  141.05   14.22
  -4  22   3   39.31    6.76
  -4  22   3   35.50    7.84
   4  22  -3   56.64   10.30
  -4 -22   3   61.94   11.30
  -4 -22   3   21.06    5.68
   4 -22  -3   27.81    5.60
  -4  22   2    2.92    0.79
  -4  22   2    0.17    0.51
   4  22  -2    1.09    1.37
  -4 -22   2    1.01    2.69
  -4 -22   2    2.42    2.18
   4  22  -1  446.12   14.02
  -4  22   1  449.89   12.99
  -4 -22   1  544.10   17.55
  -4 -22   1  407.64   13.73
  -4  22   0   80.57    9.39
   4  22   0   46.03    8.29
  -4 -22   0   64.29    9.50
  -4 -22   0   33.81    5.46
  -4  22  -1  161.41   10.34
  -4  22  -1  210.49   15.89
  -4 -22  -1  222.05   21.73
   4 -22   1  207.57   14.30
  -4 -22  -1  131.82    9.17
   4  22   2   44.93    7.93
  -4  22  -2   47.86    8.01
  -4  22  -2   73.39   14.54
   4 -22   2   42.53    7.82
  -4 -22  -2   38.93    7.57
  -4 -22  -2   27.40    5.31
   4  22   3  204.40    9.62
  -4  22  -3  207.86   41.25
  -4  22  -3  315.95   18.92
   4 -22   3  290.29   12.86
  -4 -22  -3  270.61   10.39
  -4 -22  -3  199.09    9.58
  -4  22  -4    3.44    5.25
  -4  22  -4    6.38    2.35
   4  22   4    0.61    1.74
  -4 -22  -4    3.60    1.28
   4 -22   4    0.66    1.15
  -4 -22  -4    1.59    0.98
   4  22   5  103.44   13.46
  -4  22  -5   73.99   17.85
  -4  22  -5  166.45   18.79
   4 -22   5  171.09   19.50
  -4 -22  -5  148.28   14.85
  -4  22  -6   21.80    3.88
   4  22   6   11.94    3.98
   4 -22   6   35.08    4.47
  -4 -22  -6   19.66    2.60
  -4  22  -7  364.74   17.07
   4  22   7  219.26   22.60
   4 -22   7  378.02   16.60
  -4  22  -8   49.08    8.68
   4  22   8   36.99    8.03
   4 -22   8   33.82    9.57
  -4  22  -9  258.22   28.03
   4  22   9  148.63   28.05
   4 -22   9  257.63   24.32
   4  24  -9   43.20   15.76
  -4  24   9   18.84    7.64
  -4 -24   9   46.56   13.47
   4 -24  -9   24.61    9.14
   4  24  -8    9.50    4.50
  -4  24   8    1.88    1.77
  -4 -24   8    9.59    3.64
   4 -24  -8   13.09    4.72
   4  24  -7  160.70   20.74
  -4  24   7   76.81   13.48
  -4 -24   7  139.47   23.92
   4 -24  -7   89.72   12.00
   4  24  -6  191.11   28.19
  -4  24   6   85.26   11.80
  -4 -24   6  148.31   26.21
   4 -24  -6   78.71   13.45
  -4  24   5    1.52    1.14
   4  24  -5    7.59    3.18
  -4  24   5    3.89    1.87
  -4 -24   5    3.46    1.99
   4 -24  -5    1.84    2.49
  -4  24   4  777.64   29.28
   4  24  -4  777.64   30.25
  -4  24   4  496.47   19.09
  -4 -24   4  680.67   27.05
   4 -24  -4  428.01   25.48
  -4  24   3   22.73    3.15
  -4  24   3   35.32    4.42
   4  24  -3   53.33    8.69
  -4 -24   3   25.79    5.69
   4 -24  -3   19.54    4.38
  -4  24   2   37.16    5.14
  -4  24   2   48.47   10.32
   4  24  -2   52.48    6.76
  -4 -24   2   68.04    9.06
  -4 -24   2   33.83    4.67
   4  24  -1  541.52   10.96
  -4  24   1  503.54    8.11
  -4 -24   1  656.67   14.23
  -4 -24   1  419.34    9.26
  -4  24   0  241.76   21.75
   4  24   0  219.22   16.78
  -4 -24   0  262.93   27.26
  -4 -24   0  154.57   11.70
  -4  24  -1    8.51    1.57
  -4  24  -1   14.22    3.79
   4 -24   1   16.49    2.80
  -4 -24  -1   26.53    4.34
  -4 -24  -1   10.13    2.64
   4  24   2  317.79   26.76
  -4  24  -2  262.04   11.31
  -4  24  -2  332.18   14.45
   4 -24   2  351.84   13.49
  -4 -24  -2  275.77   10.79
  -4 -24  -2  171.60    7.03
   4  24   3  193.59   19.31
  -4  24  -3  200.44   15.76
  -4  24  -3  315.93   32.72
   4 -24   3  250.80   20.68
  -4 -24  -3  226.95   18.62
  -4 -24  -3  159.21   13.09
  -4  24  -4   17.99    6.74
  -4  24  -4    4.82    1.89
   4  24   4    6.26    3.93
  -4 -24  -4    3.24    1.17
   4 -24   4    8.31    2.85
  -4 -24  -4    5.72    1.71
  -4  24  -5   81.65   14.44
   4  24   5   53.15    8.18
   4 -24   5   94.72   13.44
  -4 -24  -5   67.98    8.78
  -4  24  -6  576.51   24.76
   4  24   6  335.64   17.34
   4 -24   6  662.88   26.86
  -4  24  -7   51.59    7.84
   4  24   7   30.46    6.61
   4 -24   7   44.51   11.83
  -4  24  -8  174.64   32.36
   4  24   8   93.38   22.64
   4 -24   8  149.88   27.18
  -4  24  -9   61.23   13.83
   4  24   9   53.00    7.07
   4 -24   9   58.14   10.94
   4  26  -9   37.79   13.58
  -4  26   9   13.39    5.51
  -4 -26   9   14.61    7.50
   4 -26  -9    9.94    8.49
   4  26  -8  345.94   30.51
  -4  26   8  166.97   29.47
  -4 -26   8  333.24   34.77
   4 -26  -8  225.99   20.12
   4  26  -7  305.47   35.54
  -4  26   7  149.89   26.27
  -4 -26   7  329.86   19.29
   4 -26  -7  168.95   22.74
   4  26  -6   32.42    7.40
  -4  26   6   14.83    4.16
  -4 -26   6   26.11    7.69
   4 -26  -6    8.66    3.09
   4  26  -5   56.02    8.56
  -4  26   5   34.88    5.00
  -4 -26   5   55.95   10.52
   4 -26  -5   30.91    5.35
   4  26  -4    7.24    2.26
  -4  26   4    9.81    2.83
  -4 -26   4   10.72    4.34
   4 -26  -4    6.41    3.13
  -4  26   3   64.76   10.44
  -4  26   3  103.33   11.51
   4  26  -3  136.50   17.92
  -4 -26   3  135.48   14.06
   4 -26  -3   58.62    6.96
  -4  26   2  195.73   15.36
  -4  26   2  338.35   26.25
   4  26  -2  281.09   23.08
  -4 -26   2  372.01   30.00
   4  26  -1  783.90   29.95
  -4  26   1  658.83   24.44
  -4 -26   1  864.24   35.12
  -4 -26   1  544.98   20.95
   4  26   0    2.41    1.58
  -4  26   0    4.87    1.21
  -4  26   0    7.53    2.88
  -4 -26   0    5.29    2.94
  -4 -26   0    3.18    1.84
  -4  26  -1    7.39    2.52
  -4  26  -1    1.66    0.77
  -4 -26  -1    8.91    4.07
  -4 -26  -1    7.22    2.40
  -4  26  -2   30.62    7.64
   4  26   2   19.02    4.88
   4 -26   2   18.08    4.79
  -4 -26  -2   14.84    3.73
  -4 -26  -2    5.12    1.55
  -4  26  -3  514.80   20.04
   4  26   3  386.90   15.55
   4 -26   3  447.77   16.06
  -4 -26  -3  297.14   10.79
  -4  26  -4  394.99   28.93
   4  26   4  267.04   24.89
   4 -26   4  385.92   19.29
  -4 -26  -4  276.77   13.73
  -4  26  -5  187.78   18.84
   4  26   5  110.35   17.88
   4 -26   5  232.11   24.08
  -4  26  -6   10.76    4.24
   4  26   6   11.44    4.47
   4 -26   6   12.99    4.83
  -4  26  -7    5.94    4.62
   4  26   7    3.93    4.30
   4 -26   7    4.27    2.80
  -4  26  -8   -3.43    4.03
   4  26   8    4.05    2.59
   4 -26   8    5.19    3.20
   4  28  -8   24.52    7.00
  -4 -28   8    8.99    3.29
   4 -28  -8   13.93    4.25
   4  28  -7   98.20   27.70
  -4  28   7   68.12   22.44
  -4 -28   7   93.50   30.48
   4 -28  -7   73.21   13.14
   4  28  -6   78.28   19.36
  -4  28   6   49.64   10.06
  -4 -28   6   91.73   11.66
   4 -28  -6   37.59   10.22
   4  28  -5   76.86   17.04
  -4  28   5   55.87    7.86
  -4 -28   5   94.18   14.82
   4 -28  -5   54.79    8.93
   4  28  -4  376.37   16.65
  -4  28   4  235.06   10.57
  -4 -28   4  348.24   19.28
   4 -28  -4  140.03   18.08
   4  28  -3   23.16    4.14
  -4  28   3    8.84    2.34
  -4 -28   3   21.07    4.89
   4 -28  -3   18.38    5.22
   4  28  -2   83.33    7.64
  -4  28   2   30.08    4.75
  -4 -28   2  108.56   15.82
   4  28  -1   41.02    6.83
  -4 -28   1   46.20    7.16
  -4 -28   1   19.42    5.34
  -4  28   0  513.69   25.22
   4  28   0  511.84   18.50
  -4 -28   0  537.19   21.11
  -4 -28   0  302.12   57.84
  -4  28  -1  406.50   56.13
  -4 -28  -1  413.59   27.03
  -4  28  -2  218.03   21.91
   4  28   2  184.89   13.22
   4 -28   2  217.27   13.87
  -4 -28  -2   72.66   12.69
  -4  28  -3   27.35    5.72
   4  28   3    9.01    4.43
   4 -28   3   19.92    2.80
  -4 -28  -3    6.90    1.85
  -4  28  -4    9.89    3.20
   4  28   4    9.59    4.56
   4 -28   4   10.85    3.23
  -4  28  -5  151.60   16.88
   4  28   5   99.60   21.24
   4 -28   5  154.31   19.46
  -4  28  -6  301.89   18.13
   4  28   6  196.17   26.29
   4 -28   6  287.76   32.33
   4  28   7   53.82   19.27
  -4  28  -7  158.29   27.02
   4  28   8    4.84    3.77
  -4  28  -8   17.03    5.01
   4  30  -7  124.59   29.70
  -4 -30   7  177.30   27.02
   4 -30  -7   40.48   19.92
   4  30  -6  194.33   35.85
  -4 -30   6  177.93   29.97
   4 -30  -6   68.56   19.08
   4  30  -5   34.19    9.98
  -4 -30   5   14.24    4.78
   4  30  -4    2.23    2.91
  -4 -30   4    8.54    4.76
   4 -30  -4    6.89    3.11
   4  30  -3  195.71   22.88
  -4 -30   3  194.24   29.77
   4 -30  -3  128.44   13.78
   4  30  -2 1322.25  215.80
  -4 -30   2 1572.09   64.91
   4  30  -1   56.31   10.61
  -4 -30   1   72.89   10.40
  -4  30   0  220.67   22.14
   4  30   0  205.71   19.52
  -4 -30   0  194.28   26.50
  -4  30  -1  111.59   15.85
  -4 -30  -1   83.52   16.11
   4  30   2    3.97    2.89
  -4  30  -2    4.02    3.25
  -4 -30  -2    5.27    1.70
   4  30   3   65.20    9.84
  -4  30  -3  105.96   13.86
   4  30   4  927.95   43.65
  -4  30  -4 1149.91   53.91
   4  30   5  202.48   23.72
  -4  30  -5  224.88   30.10
   4  30   6   18.23    6.91
  -4  30  -6   46.68   11.42
   4  30   7   21.49    5.88
  -4  30  -7   21.01    7.60
   4  32  -7    7.99    5.15
   4 -32  -7    7.29    3.55
   4  32  -6   15.18    3.95
   4 -32  -6   11.82    5.52
   4  32  -5  392.96   25.92
  -4 -32   5  385.00   25.85
   4 -32  -5  175.13   18.36
   4  32  -4    3.66    1.39
  -4 -32   4    3.02    2.99
   4 -32  -4    3.52    2.34
   4  32  -3   55.01    7.29
  -4 -32   3   86.11   13.47
   4 -32  -3   23.42    5.20
   4  32  -2    2.92    2.52
  -4 -32   2   11.76    4.18
   4  32  -1    3.85    2.03
  -4 -32   1   10.05    3.60
  -4  32   0   10.71    4.07
   4  32   0   12.35    2.77
  -4 -32   0   14.11    4.49
  -4  32  -1 1192.62   55.60
  -4 -32  -1 1257.53   58.33
   4  32   2    6.27    3.29
  -4  32  -2   12.38    4.03
   4  32   3    1.52    2.61
  -4  32  -3    4.83    3.53
   4  32   4    3.23    2.94
  -4  32  -4   21.39    5.82
   4  32   5    3.61    3.75
  -4  32  -5   12.71    6.54
   4  32   6   15.01    6.87
  -4  32  -6   52.95   13.79
   4  34  -6   49.06   12.51
  -4 -34   6   72.21    7.52
   4 -34  -6   19.10    7.58
   4  34  -5   32.58    6.92
  -4 -34   5   32.30    4.57
   4 -34  -5   12.49    4.52
   4  34  -4    1.34    2.77
  -4 -34   4    3.90    3.07
   4 -34  -4    8.71    3.72
   4  34  -3    3.20    3.46
  -4 -34   3    7.63    4.46
   4 -34  -3   10.01    3.31
   4  34  -2  764.83   39.96
  -4 -34   2  860.22   46.39
   4  34  -1    8.49    1.75
  -4 -34   1    6.04    3.77
   4  34   0    8.60    3.16
  -4 -34   0    9.06    3.36
   4  34   1   20.41    5.88
  -4  34  -1   33.27    7.86
  -4  34  -2   10.05    3.43
   4  34   3    6.85    4.37
  -4  34  -3    0.33    2.98
   4  34   4  332.69   28.57
  -4  34  -4  445.46   39.25
   4  34   5   10.94    4.61
  -4  34  -5    3.38    4.22
   4  36  -4  496.92   34.52
  -4 -36   4  568.77   39.51
   4 -36  -4  264.85   23.87
   4  36  -3    2.48    2.11
  -4 -36   3    6.20    2.80
   4 -36  -3    3.13    2.71
   4  36  -2    6.32    3.41
  -4 -36   2    9.33    3.97
   4  36  -1    8.91    3.35
  -4 -36   1    5.50    2.87
  -4 -36   0  129.43   36.11
   4  36   1  142.34   29.55
  -4  36  -1  233.15   42.90
   4  36   2  292.02   25.94
  -4  36  -2  410.22   42.46
   4  36   3   10.63    3.67
  -4  36  -3    2.08    1.87
   4  36   4   -0.73    2.45
  -4  36  -4   11.26    4.03
  -4 -38   2    6.40    3.51
  -4 -38   1   90.77   28.18
  -4 -38   0    2.34    3.27
   4  38   1    9.89    4.09
  -4  38  -1    9.81    5.84
   4  38   2    2.39    2.96
  -4  38  -2   14.70    4.67
  -5   1  12   17.46    7.71
   5   1 -12   29.08    7.02
   5  -1 -12   32.37    5.59
  -5  -1  12    8.30    7.11
  -5   1  11    2.33    4.50
   5   1 -11    3.96    2.34
  -5  -1  11    3.84    2.77
   5  -1 -11   10.02    2.80
  -5   1  10  386.17   17.66
   5   1 -10  380.63   17.54
  -5  -1  10  358.37   17.65
   5  -1 -10  347.75   16.10
  -5   1   9   43.58    8.88
   5   1  -9   57.30   10.93
  -5  -1   9   49.05    7.71
   5  -1  -9   55.20    9.94
  -5   1   8    8.31    2.78
   5   1  -8   13.08    3.66
  -5  -1   8   16.62    5.84
   5  -1  -8    9.74    3.21
  -5   1   7  358.12   23.70
   5   1  -7  328.30   49.64
   5  -1  -7  261.12   21.46
  -5  -1   7  314.76   20.95
  -5   1   6  120.14   12.03
   5   1  -6  119.62   10.20
   5  -1  -6  123.95    7.84
  -5  -1   6  121.53   11.63
  -5   1   5   28.85    2.94
  -5   1   5   47.26    8.13
   5   1  -5   39.17    4.71
   5   1  -5   38.56    7.13
  -5  -1   5   53.81    7.47
   5  -1  -5   51.76    8.58
   5  -1  -5   42.21    6.29
  -5  -1   5   20.74    2.85
   5   1  -4 2272.45   41.07
  -5   1   4 2274.31   41.31
  -5   1   4 1741.92   32.04
   5   1  -4 1986.92   36.33
  -5  -1   4 2325.18   42.17
   5  -1  -4 1965.53   36.09
  -5  -1   4 1720.82   31.59
   5  -1  -4 2269.18   40.95
  -5   1   3  391.89   18.52
   5   1  -3  411.90   19.39
   5   1  -3  382.69    8.65
  -5   1   3  280.23    6.00
   5  -1  -3  401.77   18.88
  -5  -1   3  435.75   10.05
   5  -1  -3  358.19    7.59
  -5  -1   3  312.14    7.23
  -5   1   2  370.94   17.47
   5   1  -2  398.36   18.68
   5   1  -2  310.53   14.84
  -5   1   2  224.28   11.04
  -5  -1   2  367.39   17.30
   5  -1  -2  388.22   18.22
   5  -1  -2  292.07   14.08
  -5  -1   2  247.64   11.83
   5   1  -1  982.14   12.25
   5   1  -1  783.06    9.90
   5   1   0  607.10    7.97
  -5   1   0  572.93    8.16
   5   1   0  341.38    4.88
   5  -1   0  387.49    5.49
  -5  -1   0  538.78    7.55
   5  -1   0  612.20    9.37
   5   1   1  175.26   10.32
  -5   1  -1  199.15   11.43
   5   1   1  102.42    5.95
  -5  -1  -1  216.35   10.43
   5  -1   1  170.76    9.99
  -5  -1  -1  203.90   11.92
   5  -1   1   99.79    5.96
  -5   1  -2 2319.95   36.15
   5   1   2 3442.10   53.37
   5   1   2 3102.78   47.69
   5   1   2 2711.54   42.62
   5  -1   2 3491.89   54.00
  -5  -1  -2 2701.82   41.83
   5  -1   2 2484.38   39.52
   5  -1   2 2855.23   44.33
   5   1   3    2.61    1.91
   5   1   3   10.25    2.62
  -5   1  -3    6.81    1.05
  -5   1  -3    7.00    1.98
   5   1   3   10.60    1.66
   5  -1   3    5.25    1.49
  -5  -1  -3    5.12    1.36
   5  -1   3    3.34    1.47
   5   1   4  104.76    5.93
  -5   1  -4  100.91    5.28
  -5   1  -4  100.51   10.41
   5   1   4  103.61    5.74
  -5  -1  -4   98.32    5.44
   5  -1   4  101.29    6.02
  -5  -1  -4   92.77    6.68
   5  -1   4  116.22    9.10
  -5   1  -5  814.63   20.36
   5   1   5  762.04   19.70
  -5   1  -5  721.48   18.55
   5   1   5  793.56   19.57
   5  -1   5  773.82   20.57
  -5  -1  -5  828.37   20.48
   5  -1   5  803.45   20.02
   5   1   6  426.19   16.34
  -5   1  -6  473.76   15.08
   5   1   6  416.26   13.08
   5  -1   6  407.04   13.51
  -5  -1  -6  438.77   13.78
   5  -1   6  408.19   12.88
   5   1   7   11.10    5.03
  -5   1  -7    4.52    1.45
  -5  -1  -7    0.61    2.09
   5  -1   7    5.66    3.40
  -5   1  -8  629.83   23.00
   5   1   8  548.58   23.03
   5  -1   8  584.54   22.07
  -5  -1  -8  615.91   22.96
   5   1   9    9.33    5.46
  -5   1  -9   12.71    4.55
   5  -1   9   12.57    4.63
  -5  -1  -9   10.91    4.01
   5   1  10    6.23    3.86
  -5   1 -10    2.35    3.03
  -5  -1 -10    1.99    2.29
   5  -1  10    6.36    4.30
   5   1  11   97.68   17.49
  -5   1 -11   57.38   18.57
  -5  -1 -11   99.92   17.59
   5  -1  11   77.10   19.10
  -5   3  12   67.16   29.47
   5   3 -12  124.77   15.60
   5  -3 -12  147.68   13.59
  -5  -3  12  142.10   13.89
  -5   3  11   75.84   21.56
   5   3 -11  101.22   18.11
  -5  -3  11  120.96   19.31
   5  -3 -11   99.75   23.19
  -5   3  10   91.77   22.37
   5   3 -10   98.25   14.09
  -5  -3  10  108.43   12.69
   5  -3 -10   77.95   10.14
  -5   3   9  194.64   14.15
   5   3  -9  164.13   16.09
  -5  -3   9  176.83   13.29
   5  -3  -9  188.26   17.30
  -5   3   8  368.21   29.41
   5   3  -8  376.98   83.41
  -5  -3   8  372.46   29.75
   5  -3  -8  357.98   15.20
  -5   3   7   83.10    8.91
   5   3  -7   87.04    8.89
   5  -3  -7   97.56   13.54
  -5  -3   7   80.35   13.84
   5   3  -6  163.32   13.34
  -5   3   6  175.21   12.00
   5  -3  -6  144.77    8.40
   5  -3  -6  100.06    6.63
  -5  -3   6  163.60    9.96
   5   3  -5  880.21   16.83
  -5   3   5  879.45   18.08
   5   3  -5  866.25   16.23
  -5   3   5  650.02   12.72
   5  -3  -5  878.09   16.44
  -5  -3   5  900.76   17.10
  -5  -3   5  665.96   12.93
   5  -3  -5  820.73   16.75
   5   3  -4  607.82   14.52
  -5   3   4  638.38   12.94
   5   3  -4  655.69   13.36
  -5   3   4  468.05    9.98
  -5  -3   4  704.18   14.83
   5  -3  -4  524.29   11.26
  -5  -3   4  490.09   10.64
   5  -3  -4  602.09   12.02
  -5   3   3  146.66    7.59
  -5   3   3  106.40    5.83
   5   3  -3  146.35    7.84
   5   3  -3  132.98    7.29
  -5  -3   3  154.36    8.80
  -5  -3   3  120.25    6.32
   5  -3  -3  105.61    5.74
   5  -3  -3  146.83    7.46
   5   3  -2 3360.69   52.15
  -5   3   2 3143.91   48.51
   5   3  -2 2812.70   43.72
   5  -3  -2 3368.38   51.86
  -5  -3   2 3204.39   49.82
  -5  -3   2 2271.12   35.48
   5  -3  -2 2312.51   36.49
  -5   3   1  111.16    6.61
   5   3  -1  146.28    8.73
   5   3  -1  127.70    7.51
  -5  -3   1  119.86    7.25
   5  -3  -1  164.16    9.41
   5  -3  -1  118.53    7.36
  -5  -3   1  109.16    6.47
  -5   3   0  868.06   10.49
   5   3   0  559.69    7.06
   5   3   0  908.26   10.82
   5  -3   0  846.98   11.15
   5  -3   0  619.35    8.48
  -5  -3   0  742.89   12.44
  -5   3  -1 1299.44   21.66
   5  -3   1 1131.79   18.09
  -5   3  -2  100.84    6.37
   5   3   2  160.42    8.05
   5   3   2  146.64    7.04
   5   3   2  125.34    6.88
   5  -3   2  169.60    8.29
  -5  -3  -2  142.75    6.87
   5  -3   2  134.71    6.92
   5  -3   2  132.31    6.62
   5   3   3  724.77   14.69
  -5   3  -3  491.17   10.25
   5   3   3  544.50   11.40
  -5   3  -3  407.59    8.78
   5   3   3  586.97   11.06
   5  -3   3  552.63   11.38
   5  -3   3  582.70   11.49
  -5   3  -4 1643.97   28.64
   5   3   4 1658.31   29.37
   5   3   4 1780.31   30.19
  -5   3  -4 1658.22   28.78
   5  -3   4 1701.83   29.71
  -5  -3  -4 1639.99   28.01
   5  -3   4 1894.29   32.51
  -5  -3  -4 1573.76   27.90
   5   3   5   53.08    5.00
  -5   3  -5   65.61    8.10
  -5   3  -5   52.75    7.49
   5   3   5   48.43    3.42
   5  -3   5   52.87    9.00
   5  -3   5   61.38    6.52
  -5  -3  -5   60.03    4.15
   5   3   6  989.11   29.98
   5   3   6  927.65   27.30
  -5   3  -6 1003.84   31.12
  -5  -3  -6 1009.16   30.98
   5  -3   6  970.00   28.76
   5  -3   6  986.21   29.68
   5   3   7  277.69   11.31
   5   3   7  305.26   13.78
  -5   3  -7  330.48   13.64
  -5  -3  -7  354.99   14.31
   5  -3   7  291.79   13.12
   5   3   8   52.40    8.86
  -5   3  -8   58.10   12.44
   5  -3   8   61.52    8.27
  -5  -3  -8   55.29    7.85
   5   3   9   63.27   13.89
  -5   3  -9   52.28    8.39
  -5  -3  -9   54.30   12.31
   5  -3   9   52.53   10.91
   5   3  10  317.31   18.70
  -5   3 -10  336.32   18.89
  -5  -3 -10  319.77   17.61
   5  -3  10  299.14   17.55
   5   3  11   10.26    4.03
  -5   3 -11    2.46    1.94
  -5  -3 -11    7.89    4.23
   5  -3  11   -1.63    3.88
  -5   5  12   40.42   18.98
   5   5 -12   86.30   22.16
  -5  -5  12   96.87   11.68
   5  -5 -12   89.10    8.86
  -5   5  11  221.72   16.36
   5   5 -11  238.94   17.06
   5  -5 -11  189.00   35.77
  -5  -5  11  248.72   18.29
  -5   5  10   -1.70    3.85
   5   5 -10    6.67    5.20
  -5  -5  10    2.88    3.80
   5  -5 -10    0.58    3.80
   5   5  -9  305.62   20.42
  -5   5   9  300.66   20.00
  -5  -5   9  302.97   20.26
   5  -5  -9  326.55   17.67
   5   5  -8  956.02   37.41
  -5   5   8  904.91   35.02
  -5  -5   8  903.42   35.04
   5  -5  -8  790.18   30.98
   5   5  -7  476.05   10.67
  -5   5   7  483.38   11.17
  -5  -5   7  500.26   11.40
   5  -5  -7  438.97   10.25
   5   5  -6  546.52   15.11
  -5   5   6  521.85   14.19
   5  -5  -6  468.97   12.74
   5  -5  -6  455.95   13.17
  -5  -5   6  555.88   15.91
   5   5  -5  905.55   22.85
  -5   5   5  875.76   22.81
   5   5  -5  891.68   22.30
   5  -5  -5  885.42   21.93
  -5  -5   5  946.27   23.78
  -5  -5   5  842.07   21.14
   5  -5  -5  666.47   17.56
   5   5  -4   53.33    6.73
   5   5  -4   44.40    6.11
  -5   5   4   60.81    8.67
  -5   5   4   25.81    2.43
  -5  -5   4   65.56    7.82
  -5  -5   4   45.66    4.43
   5  -5  -4   46.52    6.25
   5  -5  -4   41.13    2.86
   5   5  -3 1269.18   20.82
  -5   5   3 1360.56   21.84
   5   5  -3 1375.39   22.53
  -5   5   3  893.09   16.28
  -5  -5   3 1411.56   23.38
   5  -5  -3 1011.71   17.69
  -5  -5   3 1111.02   18.30
   5  -5  -3 1326.59   21.27
   5   5  -2 1513.74   24.16
   5   5  -2 1617.54   26.14
  -5   5   2 1485.92   23.42
   5  -5  -2 1590.10   24.92
  -5  -5   2 1550.55   25.36
  -5  -5   2 1228.33   19.81
   5  -5  -2  986.38   16.78
   5   5  -1 3189.82   49.65
  -5   5   1 2877.65   44.15
   5   5  -1 3308.54   50.82
  -5  -5   1 2866.66   44.78
   5  -5  -1 4549.22   70.07
   5  -5  -1 3912.88   59.74
  -5  -5   1 2577.93   39.76
  -5   5   0 1035.68   16.45
   5   5   0  601.19   10.67
   5   5   0  687.79   11.07
   5  -5   0  757.78   12.18
   5  -5   0  884.19   14.97
  -5   5  -1  445.51    8.77
   5   5   1  360.44    5.96
   5   5   1  422.91    8.55
   5   5   1  326.97    5.45
   5  -5   1  408.91   18.96
  -5  -5  -1  491.00    9.19
   5  -5   1  307.80   14.59
   5  -5   1  409.36    7.23
  -5   5  -2   56.00    8.35
   5   5   2   74.94    5.54
   5   5   2   55.99    3.70
   5   5   2   63.08    3.15
   5  -5   2   60.37    4.02
   5  -5   2   84.72    5.02
   5  -5   2   65.57    7.84
  -5  -5  -2   72.53    3.96
   5   5   3 1669.11   30.70
   5   5   3 1202.79   22.85
  -5   5  -3 1135.59   21.31
  -5   5  -3  980.58   18.68
   5   5   3 1326.60   23.70
   5  -5   3 1253.59   23.18
   5  -5   3 1333.86   24.67
   5   5   4 1722.67   30.20
  -5   5  -4 1157.08   20.66
   5   5   4 1240.43   22.74
   5   5   4 1314.65   22.49
  -5   5  -4 1213.53   21.84
   5  -5   4 1261.47   22.75
  -5  -5  -4 1269.83   21.84
   5  -5   4 1384.42   24.36
   5   5   5  974.39   25.20
  -5   5  -5  985.12   24.89
  -5   5  -5  873.36   22.11
   5   5   5  928.15   22.86
   5  -5   5  992.24   26.89
   5  -5   5 1009.24   25.26
  -5  -5  -5 1008.39   24.74
   5   5   6    6.88    1.89
   5   5   6   15.84    4.31
  -5   5  -6   13.38    3.04
  -5  -5  -6   14.70    2.72
   5  -5   6   15.97    3.57
   5   5   7  130.51   12.44
   5   5   7  156.65   15.45
  -5   5  -7  211.64   22.27
  -5  -5  -7  149.12   15.43
   5  -5   7  161.19   15.99
   5   5   8   38.40   10.94
  -5   5  -8   39.99    6.82
   5  -5   8   41.77    7.42
  -5  -5  -8   34.99    7.02
   5   5   9  447.88   19.69
  -5   5  -9  514.26   21.85
   5  -5   9  454.11   19.76
  -5  -5  -9  437.67   20.89
   5   5  10  667.36   35.97
  -5   5 -10  842.02   44.33
  -5  -5 -10  744.42   38.79
   5  -5  10  712.35   37.93
   5   5  11  114.77   30.10
  -5   5 -11  194.88   14.84
  -5  -5 -11  115.42   23.08
   5  -5  11  157.16   12.88
  -5   7  12    6.94    4.83
   5   7 -12    6.69    4.16
  -5  -7  12    4.51    4.37
   5  -7 -12    3.65    3.37
  -5   7  11   13.20    6.67
   5   7 -11   12.68    4.04
  -5  -7  11   20.58    6.75
   5  -7 -11   13.64    6.45
   5   7 -10   50.13    7.18
  -5   7  10   34.88   10.00
  -5  -7  10   34.77   11.73
   5  -7 -10   31.82    9.27
   5   7  -9    5.37    3.01
  -5   7   9    3.51    3.31
  -5  -7   9    0.69    3.89
   5  -7  -9    5.91    3.46
   5   7  -8  106.34   20.85
  -5   7   8   92.21   15.12
  -5  -7   8   89.88   17.92
   5  -7  -8  105.70   21.80
   5   7  -7  492.81   12.34
  -5   7   7  478.41   10.73
  -5  -7   7  508.93   11.60
   5  -7  -7  447.64   16.46
  -5   7   6  101.86    6.74
   5   7  -6  128.94   10.98
  -5  -7   6  140.94   12.54
   5  -7  -6   91.58    6.97
   5  -7  -6  103.92    8.28
  -5   7   5   71.19    6.65
   5   7  -5   91.26   13.26
  -5  -7   5   89.76    6.94
   5  -7  -5   76.05    8.37
  -5  -7   5   54.54    4.21
   5  -7  -5   68.64    6.33
   5   7  -4    5.63    2.59
   5   7  -4    6.36    1.73
  -5   7   4    2.10    1.78
  -5   7   4    3.47    1.87
  -5  -7   4    0.49    2.26
   5  -7  -4    4.42    2.23
  -5  -7   4    3.01    2.09
   5  -7  -4    1.34    0.75
   5   7  -3    3.73    1.67
   5   7  -3    3.97    1.92
  -5   7   3   14.83    2.09
   5  -7  -3    8.31    1.96
  -5  -7   3   15.14    2.76
  -5  -7   3    5.50    2.09
   5  -7  -3    4.10    1.83
   5   7  -2  569.08   10.10
   5   7  -2  550.76   10.33
  -5   7   2  520.38    8.95
   5  -7  -2  549.96    9.21
  -5  -7   2  545.56   12.17
  -5  -7   2  468.63    8.45
   5  -7  -2  381.50    8.37
   5   7  -1  212.87   10.43
  -5   7   1  207.80    9.73
   5   7  -1  240.44   11.34
  -5  -7   1  210.81   10.56
   5  -7  -1  309.71   14.86
   5  -7  -1  248.48   11.61
  -5  -7   1  191.49    9.09
  -5   7   0  283.41   13.67
   5   7   0  199.15    9.76
   5   7   0  239.12   11.14
   5  -7   0  248.85   11.60
  -5  -7   0  216.26   10.90
   5  -7   0  276.68   13.70
  -5   7  -1  228.82   11.41
   5   7   1  221.55   10.15
   5   7   1  229.49   12.18
   5   7   1  257.93   11.82
  -5  -7  -1  246.19   12.16
   5  -7   1  189.38    9.36
   5  -7   1  209.31    9.84
   5  -7   1  235.99   11.19
   5   7   2  231.43   11.45
   5   7   2  184.70    8.48
   5   7   2  167.44    8.83
  -5   7  -2  151.88    9.29
   5  -7   2  166.43    8.29
   5  -7   2  186.53    9.49
   5   7   3  146.19   10.10
  -5   7  -3   80.01    4.92
  -5   7  -3  101.60    5.60
   5   7   3   96.06    5.93
   5   7   3   97.71    4.75
  -5  -7  -3   76.60    4.37
   5  -7   3  108.32    6.84
   5  -7   3  104.91    5.72
   5   7   4 1062.39   26.26
  -5   7  -4  724.55   18.11
   5   7   4  751.33   19.42
   5   7   4  767.94   18.55
  -5   7  -4  751.92   19.24
   5  -7   4  841.30   20.91
  -5  -7  -4  752.26   18.05
   5  -7   4  857.27   21.34
  -5   7  -5  762.91   19.43
   5   7   5  794.26   21.02
   5   7   5  759.20   18.78
  -5   7  -5  838.59   21.70
   5  -7   5  837.38   21.53
   5  -7   5  822.54   21.55
  -5  -7  -5  827.02   20.38
   5   7   6   43.08    9.46
   5   7   6   78.70   12.40
  -5   7  -6   69.03   14.58
  -5  -7  -6   63.85   11.31
   5  -7   6   58.96   12.28
   5   7   7  102.42    8.48
   5   7   7  112.71   19.53
  -5   7  -7  124.28   19.78
  -5  -7  -7  110.03   18.43
   5  -7   7  126.99   33.94
   5   7   8   14.14    5.34
  -5   7  -8   13.75    4.21
   5  -7   8   13.81    3.78
  -5  -7  -8   22.49    5.85
   5   7   9  287.46   53.84
  -5   7  -9  325.82   32.47
   5  -7   9  328.55   15.55
  -5  -7  -9  319.95   13.69
   5   7  10   55.52   17.96
  -5   7 -10   40.63   14.71
  -5  -7 -10   49.67   13.41
   5  -7  10   58.46   16.88
   5   7  11   88.38   24.88
  -5   7 -11  159.84   28.05
  -5  -7 -11   75.23   21.62
   5  -7  11   90.32   24.39
   5   9 -11   17.66    6.08
  -5   9  11   17.20    8.55
  -5  -9  11   36.69    8.47
   5  -9 -11   26.67    6.28
  -5   9  10  318.01   18.67
   5   9 -10  350.11   20.07
  -5  -9  10  328.79   21.15
   5  -9 -10  298.23   15.91
   5   9  -9  113.02   10.68
  -5   9   9   84.98   15.32
  -5  -9   9  111.21   17.77
   5  -9  -9   99.84   11.18
   5   9  -8  252.77   24.74
  -5   9   8  259.48   30.73
  -5  -9   8  275.32   31.45
   5  -9  -8  233.19   26.25
   5   9  -7  387.39   16.94
  -5   9   7  321.28   13.58
  -5  -9   7  369.12   16.79
   5  -9  -7  295.12   16.90
  -5   9   6    4.24    1.89
   5   9  -6    7.64    3.37
  -5  -9   6    5.23    3.33
   5  -9  -6    7.90    2.68
   5  -9  -6    4.68    2.97
  -5   9   5    2.68    1.75
   5   9  -5    7.69    2.23
  -5  -9   5    6.95    3.95
   5  -9  -5    8.47    1.35
  -5  -9   5    1.98    2.07
   5  -9  -5    4.00    1.31
   5   9  -4  935.01   17.74
  -5   9   4  913.87   16.55
   5   9  -4  897.37   16.79
   5  -9  -4  903.71   16.20
  -5  -9   4  990.95   18.84
  -5  -9   4  783.39   15.30
   5  -9  -4  663.26   13.41
   5   9  -3   37.47    2.66
   5   9  -3   43.08    3.57
  -5   9   3   62.88    6.86
   5  -9  -3   40.51    3.28
  -5  -9   3   59.68    5.84
  -5  -9   3   39.95    4.04
   5  -9  -3   38.54    6.44
   5   9  -2  262.90   12.77
  -5   9   2  269.07   12.55
   5   9  -2  328.22   15.52
  -5  -9   2  300.19   14.70
   5  -9  -2  372.97   17.95
   5  -9  -2  276.01   12.88
  -5  -9   2  255.68   12.27
   5  -9  -2  186.79    9.61
   5   9  -1 1294.00   21.33
  -5   9   1 1616.97   24.76
   5   9  -1 1660.19   25.95
  -5  -9   1 1344.67   22.32
   5  -9  -1 2014.66   32.19
   5  -9  -1 1449.53   22.24
  -5  -9   1 1347.47   21.19
   5   9   0   58.02    2.93
   5   9   0   59.32    5.85
  -5   9   0   65.14    4.72
  -5  -9   0   69.17    6.43
   5  -9   0   76.39    8.24
   5  -9   0   66.51    4.41
   5  -9   0   61.26    2.99
  -5  -9   0   41.36    2.20
  -5   9  -1   55.87    4.65
   5   9   1   67.30    8.13
   5  -9   1   55.33    4.04
   5  -9   1   61.15    4.38
  -5  -9  -1   64.03   10.07
   5  -9   1   47.71    4.58
   5   9   2 1063.43   20.31
   5   9   2  776.92   15.92
  -5   9  -2  725.35   13.58
  -5   9  -2  823.48   16.39
   5  -9   2  955.27   17.65
   5  -9   2  760.14   14.94
   5   9   3   24.15    3.32
  -5   9  -3   17.32    1.94
   5   9   3   23.61    4.45
  -5   9  -3   22.20    2.94
   5   9   3   13.93    1.42
   5  -9   3   18.70    3.43
   5  -9   3   22.08    3.39
   5   9   4  190.29   12.24
  -5   9  -4  177.00   10.83
   5   9   4  149.96    8.85
  -5   9  -4  193.05   14.07
   5  -9   4  198.24   12.13
  -5  -9  -4  178.08   10.53
   5  -9   4  189.43   16.80
  -5   9  -5  453.33   12.28
   5   9   5  491.59   19.87
  -5   9  -5  499.89   15.63
   5   9   5  423.10   10.79
   5  -9   5  517.47   14.34
  -5  -9  -5  510.97   12.83
   5   9   6   50.53    9.99
   5   9   6   82.13   14.22
  -5   9  -6   87.00    8.48
  -5  -9  -6   92.45    9.49
   5  -9   6   88.53   12.60
   5   9   7    4.74    1.54
   5   9   7    5.94    2.84
  -5   9  -7    5.21    3.14
  -5  -9  -7   15.15    3.84
   5  -9   7   13.96    5.86
  -5   9  -8  316.29   21.04
   5   9   8  299.30   20.10
   5  -9   8  308.07   20.33
  -5  -9  -8  301.94   19.41
  -5   9  -9   18.87    4.85
   5   9   9   13.17    4.50
   5  -9   9   17.26    4.98
  -5  -9  -9   16.69    5.66
   5   9  10   15.48    4.12
  -5   9 -10    1.47    2.76
  -5  -9 -10    3.68    1.68
   5   9  11   68.02   13.01
  -5   9 -11   85.38    7.84
   5  -9  11   85.83    9.34
   5  11 -11  637.50   54.98
  -5  11  11  497.45   41.79
  -5 -11  11  629.87   52.74
   5 -11 -11  497.96   42.62
   5  11 -10  148.40   17.66
  -5  11  10   78.30   22.10
  -5 -11  10  109.83   34.47
   5 -11 -10  117.80   14.34
   5  11  -9  236.19   24.06
  -5  11   9  212.70   19.14
  -5 -11   9  271.92   45.44
   5 -11  -9  193.27   18.38
   5  11  -8   82.56   11.53
  -5  11   8   60.94   12.34
  -5 -11   8   75.60   15.93
   5 -11  -8   61.55   12.35
   5  11  -7   32.48    8.47
  -5  11   7   30.64    6.01
  -5 -11   7   26.32    5.34
   5 -11  -7   23.13    5.70
  -5  11   6  349.17   24.55
   5  11  -6  365.15   24.50
  -5 -11   6  393.34   59.44
   5 -11  -6  347.62   52.36
   5 -11  -6  282.94   42.88
  -5  11   5 2332.24   56.25
   5  11  -5 2563.23   62.16
  -5 -11   5 2714.11   65.95
   5 -11  -5 2365.09   57.01
   5 -11  -5 1908.58   47.00
  -5  11   4  299.57    8.26
   5  11  -4  365.94   10.22
  -5 -11   4  369.70   13.89
   5 -11  -4  312.74    8.49
  -5 -11   4  272.85   12.96
   5 -11  -4  250.94    9.94
   5  11  -3 2787.23   47.15
   5  11  -3 2420.89   41.48
  -5  11   3 2503.28   41.84
   5 -11  -3 2492.44   41.68
  -5 -11   3 2810.78   48.15
  -5 -11   3 2222.43   37.80
   5 -11  -3 1837.06   32.19
   5  11  -2  123.50    6.70
  -5  11   2  117.22    5.99
   5  11  -2  139.18    7.76
  -5 -11   2  142.51   11.63
   5 -11  -2  174.97   10.93
   5 -11  -2  121.44    5.89
  -5 -11   2  126.06    9.10
   5 -11  -2   69.41    4.55
   5  11  -1   54.28    3.94
   5  11  -1   42.19    4.52
   5 -11  -1   39.16    2.43
   5 -11  -1   64.82    6.41
  -5 -11   1   58.59    8.98
  -5 -11   1   39.99    4.52
   5  11   0    6.67    0.88
   5  11   0    4.91    2.25
  -5  11   0   14.94    2.46
   5 -11   0   10.86    2.53
  -5 -11   0    9.98    2.50
  -5 -11   0    2.05    0.48
   5  11   1 4340.04  181.39
  -5  11  -1 3670.51   65.65
   5 -11   1 4078.77  170.49
   5  11   2  616.32   12.13
   5  11   2  440.67    9.58
  -5  11  -2  451.60    8.26
  -5  11  -2  504.11   11.24
   5 -11   2  597.68   10.69
   5 -11   2  503.05   10.80
   5  11   3 1649.61   29.08
   5  11   3 1101.16   20.63
  -5  11  -3 1179.34   20.43
  -5  11  -3 1121.28   20.74
   5 -11   3 1443.90   25.43
   5 -11   3 1185.74   21.48
  -5  11  -4   17.50    3.29
   5  11   4   20.82    3.74
  -5  11  -4   20.24    3.08
   5  11   4   13.61    1.74
   5 -11   4   21.76    2.65
  -5 -11  -4   19.72    2.22
   5  11   5  415.51   14.77
  -5  11  -5  402.94   12.62
  -5  11  -5  418.28   15.11
   5  11   5  306.11    9.31
   5 -11   5  425.75   15.19
  -5 -11  -5  426.03   12.85
   5  11   6    6.96    1.40
   5  11   6   21.16    4.62
  -5  11  -6   30.50    7.16
  -5 -11  -6   20.43    3.84
   5 -11   6   29.89    4.75
   5  11   7 1094.26   37.81
   5  11   7 1348.77   47.85
  -5  11  -7 1505.68   52.65
  -5 -11  -7 1518.49   52.20
   5 -11   7 1619.74   56.74
  -5  11  -8  373.13   31.86
   5  11   8  265.99   12.72
   5 -11   8  336.64   15.27
  -5 -11  -8  341.47   15.09
  -5  11  -9  465.92   23.18
   5  11   9  354.36   18.53
   5 -11   9  446.80   22.39
  -5 -11  -9  403.00   19.32
  -5  11 -10   21.13    5.88
   5  11  10   15.99    6.69
   5 -11  10   23.72    6.94
  -5  11 -11  155.95   17.70
   5  11  11   69.95   19.44
   5 -11  11   44.31   24.31
   5  13 -11  133.62   26.84
  -5  13  11  107.53   20.25
  -5 -13  11   78.31   27.02
   5 -13 -11  124.18   25.02
   5  13 -10   96.77   19.32
  -5  13  10   62.44   18.01
  -5 -13  10  107.65   26.45
   5 -13 -10   93.98   17.98
   5  13  -9  336.87   18.94
  -5  13   9  291.32   14.30
  -5 -13   9  373.89   17.28
   5 -13  -9  277.86   15.33
   5  13  -8   55.73    6.49
  -5  13   8   34.18    6.63
  -5 -13   8   44.36    9.08
   5 -13  -8   39.42    7.16
   5  13  -7   64.30   12.11
  -5  13   7   46.54    9.76
  -5 -13   7   73.09   12.69
   5 -13  -7   46.75    8.62
  -5  13   6  209.06   16.70
   5  13  -6  239.05   18.72
  -5 -13   6  261.35   21.59
   5 -13  -6  207.37   15.60
   5 -13  -6  185.32   16.75
  -5  13   5 1433.06   41.66
   5  13  -5 1695.94   49.62
  -5 -13   5 1693.96   49.85
   5 -13  -5 1528.20   44.32
   5 -13  -5 1171.14   36.42
  -5  13   4  748.05   18.93
   5  13  -4  931.60   23.32
  -5 -13   4  905.10   23.49
   5 -13  -4  810.42   19.87
  -5 -13   4  729.54   18.52
   5 -13  -4  604.06   16.25
  -5  13   3  545.68    9.89
   5  13  -3  525.90   11.12
   5  13  -3  673.42   12.95
  -5 -13   3  649.86   13.45
   5 -13  -3  760.47   14.86
   5 -13  -3  584.93   10.69
  -5 -13   3  543.44   10.57
   5 -13  -3  420.82   13.88
   5  13  -2   38.71    3.00
  -5  13   2   46.11    3.48
   5  13  -2   56.83    6.13
  -5 -13   2   34.64    4.17
   5 -13  -2   57.87    5.27
   5 -13  -2   44.29    3.54
  -5 -13   2   37.27    3.88
   5  13  -1   58.56    7.16
   5  13  -1   61.50    4.78
  -5 -13   1   64.18    8.81
   5 -13  -1   66.42    6.56
  -5 -13   1   51.64    4.13
  -5  13   0  143.06   10.60
   5  13   0  123.38    9.74
   5  13   0  147.96    7.14
  -5 -13   0  142.26    9.28
   5 -13   0  119.54    6.58
  -5 -13   0  113.15    6.41
  -5  13  -1 1071.01   19.68
   5  13   1 1101.97   20.09
  -5 -13  -1 1108.23   20.47
   5 -13   1 1127.11   20.50
  -5  13  -2  956.65   18.09
   5  13   2 1020.46   18.85
  -5  13  -2  726.58   12.60
   5 -13   2 1082.49   18.54
  -5 -13  -2 1039.10   19.69
   5 -13   2  890.74   16.78
  -5  13  -3  346.55    8.88
   5  13   3  329.68   10.01
  -5  13  -3  366.35   10.76
   5 -13   3  431.93   11.11
  -5  13  -4   -1.33    3.16
  -5  13  -4    5.57    1.84
   5  13   4    5.08    2.74
  -5 -13  -4    1.35    0.54
   5 -13   4    5.11    2.15
  -5 -13  -4    0.57    0.32
  -5  13  -5    0.61    1.52
   5  13   5    9.83    4.75
  -5  13  -5    2.65    3.00
   5 -13   5    8.53    2.92
  -5 -13  -5   -0.10    0.68
   5  13   6   61.51    8.17
   5  13   6  100.93   13.24
  -5  13  -6  122.59   19.84
  -5 -13  -6   99.46   12.37
   5 -13   6   99.40   14.82
   5  13   7  709.38   24.79
   5  13   7  949.39   38.08
  -5  13  -7 1180.70   41.97
  -5 -13  -7 1077.28   37.24
   5 -13   7 1133.22   39.96
  -5  13  -8  221.57   29.49
   5  13   8  224.61   20.60
   5 -13   8  240.17   21.83
  -5 -13  -8  226.50   20.78
  -5  13  -9   20.72    7.70
   5  13   9   20.00    7.45
   5 -13   9   12.36    3.57
  -5 -13  -9   14.79    6.61
  -5  13 -10    1.66    4.04
   5  13  10    3.04    5.58
   5 -13  10    8.42    4.69
   5  15 -11   22.75    6.46
  -5  15  11   11.52    4.81
  -5 -15  11   11.70    6.85
   5 -15 -11   11.86    5.05
   5  15 -10  319.90   25.96
  -5  15  10  275.56   20.22
  -5 -15  10  326.64   22.63
   5 -15 -10  231.81   24.38
   5  15  -9    8.77    4.45
  -5  15   9    7.91    5.26
  -5 -15   9    9.29    5.69
   5 -15  -9    6.53    2.59
   5  15  -8    1.73    1.87
  -5  15   8   -2.23    2.63
  -5 -15   8    4.39    2.75
   5 -15  -8    5.44    4.29
   5  15  -7  121.37   21.99
  -5  15   7   89.20   15.96
  -5 -15   7  121.51   13.70
   5 -15  -7   96.19   12.89
  -5  15   6    2.27    3.17
   5  15  -6    1.87    2.75
  -5 -15   6    7.50    4.28
   5 -15  -6   -0.77    1.52
   5 -15  -6    0.17    3.46
  -5  15   5  178.22   12.33
   5  15  -5  227.17   15.36
  -5 -15   5  232.44   17.67
   5 -15  -5  179.60   15.22
   5 -15  -5  178.55   13.11
  -5  15   4  790.85   19.97
   5  15  -4 1084.19   27.29
  -5 -15   4 1115.62   28.86
   5 -15  -4  909.50   22.46
  -5 -15   4  859.91   21.75
   5 -15  -4  678.94   19.71
  -5  15   3  150.96    9.03
   5  15  -3  184.00   11.29
  -5 -15   3  170.38   11.15
   5 -15  -3  152.70   10.47
  -5 -15   3  138.28    9.47
   5 -15  -3  117.34    9.52
  -5  15   2   22.02    2.55
   5  15  -2   29.95    4.54
  -5  15   2   15.29    1.91
   5  15  -2   16.13    2.23
   5 -15  -2   21.41    3.18
  -5 -15   2   32.02    3.98
  -5 -15   2   17.54    2.26
   5  15  -1  359.26   15.65
   5  15  -1  400.75    7.77
  -5 -15   1  337.58    8.48
   5 -15  -1  390.29    9.65
  -5 -15   1  313.52    6.23
  -5  15   0  121.23    6.82
   5  15   0  153.67    7.54
   5  15   0  151.85    6.73
  -5 -15   0  157.31    8.08
   5 -15   0  119.48    9.63
  -5 -15   0  143.83    7.07
  -5  15  -1   42.39    5.99
   5  15   1   30.17    2.92
  -5 -15  -1   48.49    5.21
   5 -15   1   36.48    4.64
  -5 -15  -1   22.08    1.57
  -5  15  -2  540.60   13.03
  -5  15  -2  702.41   18.82
  -5 -15  -2  695.86   18.98
   5 -15   2  813.48   19.55
   5  15   3  103.62   12.44
  -5  15  -3   91.92    7.87
  -5  15  -3   94.76    6.67
   5 -15   3  133.29    9.30
  -5  15  -4    8.16    2.98
  -5  15  -4   12.94    2.23
   5  15   4    0.00    2.92
  -5 -15  -4    4.04    0.66
   5 -15   4    7.15    1.97
   5  15   5  219.36   17.95
  -5  15  -5  231.61   17.30
  -5  15  -5  244.38   18.75
   5 -15   5  286.60   21.29
  -5 -15  -5  254.85   18.55
  -5  15  -6  180.26   15.81
   5  15   6  159.31   21.90
   5 -15   6  170.43   17.58
  -5 -15  -6  166.54   13.13
  -5  15  -7    9.27    4.86
   5  15   7    6.79    2.54
   5 -15   7   -2.09    2.49
  -5 -15  -7    4.17    1.71
  -5  15  -8  412.18   20.49
   5  15   8  341.82   15.89
   5 -15   8  414.37   18.20
  -5 -15  -8  379.60   15.58
  -5  15  -9   49.37   13.79
   5  15   9   38.52    8.66
   5 -15   9   50.34   11.64
  -5  15 -10   13.21    7.12
   5  15  10    5.25    4.88
   5 -15  10    3.64    4.32
   5  17 -10   31.67    7.81
  -5  17  10   23.15    7.87
  -5 -17  10   40.45    9.98
   5 -17 -10   21.76    6.68
   5  17  -9  196.46   32.79
  -5  17   9  139.35   19.54
  -5 -17   9  169.17   24.30
   5 -17  -9  146.68   21.66
   5  17  -8    8.75    3.83
  -5  17   8    4.19    2.27
  -5 -17   8    7.13    3.87
   5 -17  -8    6.30    2.74
   5  17  -7 1512.98   53.63
  -5  17   7 1149.94   40.24
  -5 -17   7 1441.95   50.93
   5 -17  -7 1003.19   36.83
  -5  17   6   46.92    8.74
   5  17  -6   52.42    8.99
  -5 -17   6   59.55   12.61
   5 -17  -6   25.30    7.48
   5 -17  -6   54.98   10.26
  -5  17   5  198.98   15.83
   5  17  -5  272.26   20.63
  -5 -17   5  260.41   20.64
   5 -17  -5  216.19   16.16
   5 -17  -5  164.51   13.06
  -5  17   4   84.40    8.86
   5  17  -4  125.41   11.88
  -5 -17   4   98.42    9.67
   5 -17  -4   79.19    7.43
  -5 -17   4   74.32    6.11
   5 -17  -4   62.31    5.94
  -5  17   3  341.49   17.29
   5  17  -3  471.04   53.53
  -5 -17   3  387.68   22.19
   5 -17  -3  397.58   45.04
  -5 -17   3  347.37   18.64
   5 -17  -3  229.69   12.76
   5  17  -2    1.72    1.02
  -5  17   2    2.93    0.55
  -5 -17   2    4.48    2.97
  -5 -17   2   -0.33    1.12
   5  17  -1 2880.03   67.62
  -5 -17   1 2658.13   63.91
  -5 -17   1 2346.50   55.20
   5  17   0   61.02    5.63
  -5  17   0   87.44   11.53
  -5 -17   0   87.20   11.90
  -5 -17   0   60.16    3.85
  -5  17  -1    7.19    2.08
  -5 -17  -1    4.29    1.35
  -5 -17  -1    2.91    0.70
  -5  17  -2    3.98    0.93
  -5  17  -2   17.11    3.09
  -5 -17  -2    1.51    2.59
   5 -17   2    5.50    0.94
   5  17   3 1044.48   31.55
  -5  17  -3 1307.33   37.62
  -5  17  -3 1479.21   43.79
   5 -17   3 1740.86   50.01
  -5  17  -4    8.88    2.28
   5  17   4   11.74    4.57
  -5  17  -4   13.70    4.88
   5 -17   4   18.72    4.10
  -5  17  -5  922.64   35.60
  -5  17  -5  844.43   31.76
   5  17   5  800.31   31.29
  -5 -17  -5 1162.73   42.84
   5 -17   5 1102.73   41.92
  -5 -17  -5  962.62   35.51
  -5  17  -6   22.44    7.36
   5  17   6   13.24    4.25
   5 -17   6   10.54    3.49
  -5 -17  -6   17.51    4.35
  -5  17  -7    4.24    2.59
   5  17   7    6.13    2.13
   5 -17   7    2.42    3.15
  -5 -17  -7    2.23    1.43
  -5  17  -8   20.03    5.52
   5  17   8   14.25    4.92
   5 -17   8   12.70    4.95
  -5  17  -9  272.54   20.88
   5  17   9  239.89   17.16
   5 -17   9  326.81   21.93
  -5  17 -10    7.49    4.85
   5  17  10    1.24    4.27
   5 -17  10    3.35    4.59
   5  19 -10    0.95    3.31
  -5  19  10    2.75    2.62
  -5 -19  10   23.11    7.24
   5 -19 -10   -0.45    3.46
   5  19  -9    3.41    3.20
  -5  19   9    1.54    3.03
  -5 -19   9    1.08    4.34
   5 -19  -9    6.06    2.06
   5  19  -8  377.00   17.04
  -5  19   8  277.43   13.17
  -5 -19   8  369.16   17.17
   5 -19  -8  220.02   26.29
   5  19  -7  147.31   20.00
  -5  19   7   96.54   12.91
  -5 -19   7  127.37   20.57
   5 -19  -7   88.64    8.11
  -5  19   6  379.95   16.28
   5  19  -6  524.16   22.90
  -5 -19   6  539.68   20.75
   5 -19  -6  410.67   15.23
   5 -19  -6  365.57   19.70
  -5  19   5   29.74    4.78
   5  19  -5   46.18    9.14
  -5 -19   5   35.60    8.05
   5 -19  -5   22.70    3.56
   5 -19  -5   24.21    4.69
  -5  19   4   25.71    4.67
   5  19  -4   23.72    5.11
  -5 -19   4   11.40    5.15
   5 -19  -4    9.57    1.94
   5 -19  -4    8.20    2.95
  -5  19   3   11.46    2.17
   5  19  -3   14.72    3.16
  -5  19   3   11.00    1.65
  -5 -19   3   13.22    3.10
   5 -19  -3   10.49    3.79
   5  19  -2 1836.69   53.05
  -5 -19   2 1473.35   43.48
  -5 -19   2 1381.01   40.02
   5  19  -1  112.65    6.27
  -5 -19   1  118.17    8.34
  -5 -19   1   93.57    6.64
  -5  19   0  463.36   52.92
   5  19   0  495.68   12.46
  -5 -19   0  563.55   17.83
  -5 -19   0  427.59   10.85
  -5  19  -1   12.10    2.93
  -5 -19  -1    7.44    2.63
  -5 -19  -1    3.93    1.00
  -5  19  -2   -0.04    0.29
  -5  19  -2    9.94    3.63
  -5 -19  -2    2.97    1.21
   5 -19   2    2.14    1.16
   5  19   3   19.78    4.36
  -5  19  -3   13.03    3.07
  -5  19  -3   35.64    7.30
   5 -19   3   24.20    5.27
   5  19   4  989.90   41.08
  -5  19  -4 1241.96   46.09
  -5  19  -4 1408.14   53.28
   5 -19   4 1678.11   62.39
  -5  19  -5  112.47   20.90
   5  19   5   99.28   25.67
  -5  19  -5   51.07   12.37
  -5 -19  -5   80.73   12.85
   5 -19   5   96.78   19.09
  -5 -19  -5   82.50   13.18
  -5  19  -6  292.88   19.72
   5  19   6  281.57   41.93
   5 -19   6  371.75   47.71
  -5 -19  -6  302.59   18.99
  -5  19  -7    1.24    3.74
   5  19   7    8.57    6.02
   5 -19   7    8.11    3.55
  -5  19  -8   65.60    9.04
   5  19   8   36.86    9.47
   5 -19   8   51.22    8.35
  -5  19  -9   68.57   15.11
   5  19   9   47.37   15.62
   5 -19   9   40.88   16.09
   5  21 -10   48.37    7.94
  -5  21  10   15.74    5.49
  -5 -21  10   34.57   11.88
   5 -21 -10   26.60   10.24
   5  21  -9    7.55    3.96
  -5  21   9    2.40    2.70
  -5 -21   9    7.63    4.21
   5 -21  -9    5.47    2.84
   5  21  -8  428.85   21.65
  -5  21   8  271.78   18.85
  -5 -21   8  348.66   25.67
   5 -21  -8  261.52   16.37
   5  21  -7  530.22   22.91
  -5  21   7  360.28   15.93
  -5 -21   7  499.79   22.52
   5 -21  -7  356.76   16.37
   5  21  -6  814.68   40.64
  -5  21   6  554.56   27.41
  -5 -21   6  754.76   37.74
   5 -21  -6  519.56   27.19
  -5  21   5  235.62   22.00
   5  21  -5  382.99   34.60
  -5 -21   5  332.40   26.86
   5 -21  -5  273.06   21.56
   5 -21  -5  205.45   17.09
  -5  21   4  253.68   24.43
   5  21  -4  259.60   26.19
  -5  21   4  156.60   15.86
  -5 -21   4  249.01   29.46
   5 -21  -4  149.84   32.40
  -5  21   3   44.45    6.85
  -5  21   3   55.97    9.64
   5  21  -3   63.17   12.54
  -5 -21   3   51.03    8.82
  -5 -21   3   40.34    8.45
   5 -21  -3   39.22    7.36
   5  21  -2 1620.65   27.17
  -5 -21   2 1484.53   27.80
  -5 -21   2 1248.73   20.57
   5  21  -1  555.79   16.81
  -5 -21   1  619.39   19.98
  -5 -21   1  525.76   15.77
  -5  21   0  950.96   29.82
   5  21   0  903.00   26.26
  -5 -21   0 1055.16   32.02
  -5 -21   0  792.08   23.10
  -5  21  -1  275.48   24.36
  -5 -21  -1  317.90   32.01
  -5 -21  -1  207.00   15.11
  -5  21  -2  118.38   17.27
   5  21   2   62.96    6.39
  -5  21  -2   36.74    6.07
   5 -21   2   69.41   10.96
  -5 -21  -2   96.79   13.93
  -5 -21  -2   67.99   10.56
   5  21   3   80.92    9.25
  -5  21  -3   86.01    8.14
  -5  21  -3  127.06   14.42
   5 -21   3  129.69   13.38
   5  21   4  433.95   24.75
  -5  21  -4  492.20   18.80
  -5  21  -4  676.00   27.11
   5 -21   4  760.47   28.83
   5  21   5  355.93   22.25
  -5  21  -5  348.37   12.91
  -5  21  -5  421.72   17.16
   5 -21   5  522.53   18.92
  -5  21  -6  473.15   20.98
   5  21   6  376.12   19.07
   5 -21   6  586.42   24.43
  -5  21  -7   46.46    8.44
   5  21   7   32.09    6.44
   5 -21   7   40.57   10.73
  -5  21  -8  132.74   21.05
   5  21   8   77.92   17.69
   5 -21   8  132.62   21.04
  -5  21  -9   26.99    7.14
   5  21   9   26.66    7.17
   5 -21   9   44.91    5.23
   5  23  -9   15.87    5.19
  -5  23   9    5.89    4.37
  -5 -23   9    9.99    4.08
   5 -23  -9   22.94    7.56
   5  23  -8    0.68    2.59
  -5  23   8    8.19    3.31
  -5 -23   8    5.65    2.56
   5 -23  -8    3.46    1.75
   5  23  -7   49.90   13.35
  -5  23   7   35.30    6.91
  -5 -23   7   59.22   12.15
   5 -23  -7   32.11   10.10
   5  23  -6    9.28    2.20
  -5  23   6    4.79    2.63
  -5 -23   6    4.36    2.11
   5 -23  -6   -0.88    2.97
   5  23  -5  240.43   19.42
  -5  23   5  120.85   14.27
  -5 -23   5  202.71   23.60
   5 -23  -5  128.34    9.88
  -5  23   4  723.28   27.15
   5  23  -4  709.59   27.59
  -5  23   4  437.57   16.78
  -5 -23   4  594.71   25.64
   5 -23  -4  365.61   22.84
  -5  23   3   87.04    8.20
   5  23  -3  117.31   16.69
  -5  23   3   64.39    7.89
  -5 -23   3   94.60   10.20
   5 -23  -3   51.64    7.10
   5  23  -2   77.31    9.86
  -5 -23   2   64.00    7.61
  -5 -23   2   36.50    7.24
   5  23  -1  104.42   10.41
  -5 -23   1  126.31   14.61
  -5 -23   1   50.40   11.42
  -5  23   0   73.90   13.68
   5  23   0   45.42    9.62
  -5 -23   0   68.35   12.49
  -5 -23   0   41.95    6.60
  -5  23  -1  411.71   26.36
  -5 -23  -1  435.54   29.13
  -5 -23  -1  294.12   11.55
  -5  23  -2 1816.00   68.25
   5  23   2 1279.86   48.61
   5 -23   2 1767.89   64.99
  -5 -23  -2 1332.57   49.05
  -5 -23  -2  962.80   35.54
   5  23   3   11.61    4.61
  -5  23  -3    0.32    0.55
  -5  23  -3    5.12    2.48
   5 -23   3    2.87    1.31
  -5 -23  -3    0.49    0.43
   5  23   4   21.69    5.18
  -5  23  -4   13.26    3.32
  -5  23  -4   25.22    5.67
   5 -23   4   13.73    4.74
  -5 -23  -4    5.24    1.45
  -5  23  -5   49.14    6.70
   5  23   5   28.83    5.03
   5 -23   5   57.98    5.75
  -5  23  -6   55.14    8.14
   5  23   6   37.89    7.48
   5 -23   6   47.69    9.31
  -5  23  -7   78.25   24.28
   5  23   7   54.61   14.48
   5 -23   7  136.81   17.20
  -5  23  -8  147.13   28.29
   5  23   8   86.00   29.20
   5 -23   8  197.68   31.01
  -5  23  -9    4.19    4.36
   5  23   9   -1.55    4.34
   5 -23   9    3.38    2.78
   5  25  -9    9.72    3.55
  -5 -25   9    2.15    3.23
   5 -25  -9    3.50    2.68
   5  25  -8    6.73    4.97
  -5  25   8    1.44    2.41
  -5 -25   8    4.49    3.78
   5 -25  -8   -2.33    3.02
   5  25  -7    1.18    3.39
  -5  25   7    4.54    1.98
  -5 -25   7    6.38    4.20
   5 -25  -7    6.54    2.24
   5  25  -6    4.07    2.85
  -5  25   6    0.48    1.59
  -5 -25   6    4.80    3.94
   5 -25  -6    5.29    2.14
   5  25  -5    4.57    2.83
  -5  25   5    1.64    1.44
  -5 -25   5   10.88    5.22
   5 -25  -5    2.71    2.94
   5  25  -4  947.09   46.43
  -5  25   4  532.42   25.93
  -5 -25   4  803.72   40.07
   5 -25  -4  451.36   27.75
  -5  25   3    1.72    0.67
  -5  25   3   -0.64    0.61
   5  25  -3    6.71    2.22
  -5 -25   3    1.45    3.05
   5 -25  -3    3.49    4.10
   5  25  -2   47.93    8.04
  -5 -25   2   57.46   11.76
  -5 -25   2   21.45    6.71
   5  25  -1   39.45    6.73
  -5 -25   1   62.74   11.80
  -5 -25   1   21.06    6.11
  -5  25   0   60.32   11.47
   5  25   0   31.56    8.04
  -5 -25   0   37.95    9.42
  -5 -25   0   13.40    4.37
  -5  25  -1  268.42   27.94
  -5 -25  -1  296.60   36.24
  -5 -25  -1  165.51   13.51
  -5  25  -2  734.54   27.42
   5  25   2  513.83   20.04
   5 -25   2  664.19   22.74
  -5 -25  -2  440.06   15.44
  -5 -25  -2  348.35   12.23
  -5  25  -3    6.57    2.67
   5  25   3    8.17    3.27
   5 -25   3    3.07    1.23
  -5 -25  -3    1.00    0.68
  -5  25  -4   -1.23    3.36
   5  25   4    0.39    2.81
   5 -25   4    3.57    2.00
   5  25   5   14.48    5.22
  -5  25  -5   35.95    6.01
  -5  25  -6  205.72   22.50
   5  25   6   99.17   20.37
   5 -25   6  234.06   24.79
  -5  25  -7   -1.38    4.53
   5  25   7    4.44    4.04
   5 -25   7    4.48    2.73
  -5  25  -8  205.78   26.52
   5  25   8  130.91   19.20
   5 -25   8  317.11   22.53
   5  27  -8  429.14   30.32
  -5 -27   8  435.07   30.98
   5 -27  -8  228.97   21.47
   5  27  -7    6.87    2.67
  -5 -27   7    4.28    3.95
   5 -27  -7    6.08    4.21
   5  27  -6  389.63   21.18
  -5 -27   6  372.34   19.42
   5 -27  -6  204.59   11.67
   5  27  -5  557.92   23.43
  -5  27   5  349.59   14.48
  -5 -27   5  501.48   22.06
   5 -27  -5  293.75   16.99
   5  27  -4  206.20   19.82
  -5  27   4  115.16   11.71
  -5 -27   4  183.86   18.85
   5 -27  -4   94.09   13.24
   5  27  -3  165.80   15.16
  -5 -27   3  171.92   23.89
   5 -27  -3   84.72    7.55
   5  27  -2  516.02   25.64
  -5 -27   2  649.20   32.71
   5  27  -1    4.61    1.77
  -5 -27   1   13.34    5.18
  -5 -27   1    2.74    1.41
  -5  27   0  341.00   37.17
   5  27   0  324.25   30.85
  -5 -27   0  396.64   81.27
  -5 -27   0  199.50   19.06
  -5  27  -1  516.72   27.22
  -5 -27  -1  585.90   30.03
  -5  27  -2  428.96   33.00
   5  27   2  303.96   43.46
   5 -27   2  271.71   16.95
  -5 -27  -2  182.22   11.64
  -5  27  -3  180.29   21.96
   5  27   3  135.50   13.08
   5 -27   3  108.31   11.47
  -5  27  -4  415.72   24.05
   5  27   4  277.06   21.04
   5 -27   4  349.67   14.43
  -5  27  -5   12.42    4.56
   5  27   5   -1.87    3.18
   5 -27   5    5.76    2.24
   5  27   6   75.77   18.23
  -5  27  -6  196.21   23.28
   5  27   7  297.13   29.06
  -5  27  -7  464.04   39.40
   5  27   8   51.47   17.13
  -5  27  -8  154.11   21.11
   5  29  -8   39.65    8.19
   5 -29  -8    4.33    3.83
   5  29  -7   67.73   21.44
  -5 -29   7  101.56   17.80
   5 -29  -7   49.90   10.24
   5  29  -6   10.26    3.59
  -5 -29   6    4.94    2.91
   5 -29  -6    4.99    2.55
   5  29  -5  102.11   16.37
  -5 -29   5   89.07   11.12
   5 -29  -5   51.42    7.26
   5  29  -4  458.98   19.58
  -5 -29   4  474.04   21.87
   5 -29  -4  193.47   21.98
   5  29  -3   11.53    4.60
  -5 -29   3    8.91    3.54
   5 -29  -3    8.73    4.48
   5  29  -2  193.63   16.79
  -5 -29   2  272.96   24.10
   5  29  -1  260.38   24.14
  -5 -29   1  330.61   17.29
  -5  29   0   36.15    6.09
   5  29   0   23.74    4.35
  -5 -29   0   46.37    7.34
  -5  29  -1  131.23   18.73
  -5 -29  -1  109.86   18.20
   5  29   2  148.89   14.17
  -5  29  -2  199.56   21.69
   5  29   3   82.43    9.85
  -5  29  -3  110.20   24.64
   5  29   4  187.52   27.62
  -5  29  -4  323.01   19.87
   5  29   5   42.56   10.42
  -5  29  -5   68.21   15.24
   5  29   6   20.24    4.60
  -5  29  -6   27.56    7.26
   5  29   7   88.13   16.52
  -5  29  -7  135.84   23.97
   5  31  -7  394.51   25.38
  -5 -31   7  296.42   28.80
   5 -31  -7  100.78   32.53
   5  31  -6   43.01   14.56
  -5 -31   6   42.65   10.99
   5 -31  -6   14.99    7.04
   5  31  -5   -0.64    2.58
  -5 -31   5    0.04    3.03
   5 -31  -5    5.17    3.35
   5  31  -4    7.70    2.84
  -5 -31   4    5.91    2.91
   5 -31  -4   13.67    5.13
   5  31  -3   11.47    4.40
  -5 -31   3   10.39    3.16
   5 -31  -3    5.46    3.12
   5  31  -2   35.70   10.55
  -5 -31   2   46.19   10.37
   5  31  -1 1119.01   44.05
  -5 -31   1 1268.47   50.76
   5  31   0    5.64    2.52
  -5 -31   0   14.13    4.59
  -5  31  -1   14.65    4.72
  -5 -31  -1   20.18    6.10
   5  31   2   54.51    9.11
  -5  31  -2   65.66   13.42
   5  31   3   49.30    9.38
  -5  31  -3   58.00   14.31
   5  31   4   84.49   16.04
  -5  31  -4  134.57   23.43
   5  31   5  221.73   23.63
  -5  31  -5  341.19   32.88
   5  31   6    3.33    3.59
  -5  31  -6   10.66    4.64
   5  33  -6   63.90   10.80
  -5 -33   6   72.18    8.36
   5 -33  -6   21.68    9.75
   5  33  -5   52.44    9.68
  -5 -33   5   32.76    9.05
   5 -33  -5   31.30    7.35
   5  33  -4  402.14   26.39
  -5 -33   4  483.96   31.72
   5 -33  -4  238.29   20.23
   5  33  -3   75.93   13.44
  -5 -33   3  110.62   18.05
   5 -33  -3   43.19    9.84
   5  33  -2    2.53    2.52
  -5 -33   2    6.03    1.99
   5  33  -1  652.37   33.94
  -5 -33   1  719.87   39.45
  -5 -33   0  330.71   39.21
  -5  33  -1    8.45    2.92
   5  33   1   15.23    5.62
  -5 -33  -1    5.16    1.99
   5  33   2  390.24   22.02
  -5  33  -2  520.06   37.50
   5  33   3  172.71   51.96
  -5  33  -3  212.74   39.53
   5  33   4    4.48    3.83
  -5  33  -4    4.31    4.23
   5  33   5  456.69   36.68
  -5  33  -5  688.26   47.84
   5  35  -5   55.35   21.39
  -5 -35   5  102.23   19.25
   5 -35  -5  100.42    8.94
   5  35  -4    2.26    2.28
  -5 -35   4    7.41    3.35
   5 -35  -4    4.14    3.29
   5  35  -3  208.20   31.72
  -5 -35   3  233.57   40.09
   5 -35  -3  107.40   17.96
   5  35  -2  189.23   31.30
  -5 -35   2  222.66   36.85
  -5 -35   1    6.46    2.52
  -5 -35   0   42.32   13.92
   5  35   1  422.89   40.49
  -5  35  -1  551.47   47.38
   5  35   2   -1.06    3.51
  -5  35  -2   11.23    3.60
   5  35   3   16.20    6.33
  -5  35  -3   23.05    6.13
   5  35   4   54.24   18.33
  -5  35  -4   79.37   27.85
  -5 -37   3   60.47   17.06
   5 -37  -3   29.80    8.91
  -5 -37   2   12.22    3.32
  -5 -37   1   18.09    6.53
  -5 -37   0   41.95   15.49
   5  37   1  273.73   20.88
  -5  37  -1  377.11   28.04
   5  37   2  111.40   14.19
  -5  37  -2  121.13   30.36
  -6   0  12   31.62   16.27
   6   0 -12   45.55   20.03
  -6   0  11    4.21    5.17
   6   0 -11   -1.56    4.03
  -6   0  10 2721.68  124.09
   6   0 -10 2555.49   19.90
  -6   0   9    8.44    4.62
   6   0  -9    7.67    4.33
  -6   0   8  745.12   29.73
   6   0  -8  665.58   26.51
  -6   0   7    4.58    1.74
   6   0  -7   10.21    3.26
  -6   0   6    1.92    2.62
   6   0  -6    6.93    2.68
  -6   0   5    5.95    3.06
   6   0  -5    2.71    2.09
   6   0  -5    4.18    1.60
  -6   0   4 7275.19  417.24
   6   0  -4 7271.87  416.98
   6   0  -4 6173.79  354.19
  -6   0   4 5403.08  310.02
  -6   0   3    5.16    1.86
   6   0  -3    0.86    1.38
   6   0  -3    6.36    1.61
  -6   0   3    4.06    1.61
  -6   0   2  552.44   10.18
   6   0  -2  645.42   11.24
   6   0  -2  501.16    9.33
  -6   0   2  412.18    7.76
  -6   0   1    2.37    1.88
   6   0  -1    0.51    1.42
   6   0  -1   -0.65    1.74
  -6   0   0  842.55   14.11
   6   0   0  848.02   14.24
   6   0   0  510.81    9.10
  -6   0  -1    0.83    1.65
   6   0   1    1.51    1.19
   6   0   1    0.91    1.30
   6   0   2 4906.57   86.70
   6   0   2 4094.05   72.69
  -6   0  -2 4865.93  203.02
   6   0   2 4505.32   79.32
   6   0   3   -0.56    1.59
   6   0   3    2.42    2.99
  -6   0  -3    1.52    1.60
   6   0   3   -0.51    1.24
   6   0   4  224.62   13.91
  -6   0  -4  161.23    9.90
   6   0   4  256.57   15.21
   6   0   5    3.05    2.00
  -6   0  -5    2.89    1.37
   6   0   5    2.68    1.70
   6   0   6 1172.07   21.23
  -6   0  -6 1186.66   20.28
   6   0   6 1180.64   19.89
   6   0   7    1.95    1.83
  -6   0  -7   -1.55    2.36
   6   0   8 1714.22  218.23
  -6   0  -8 1724.45   83.55
   6   0   9    2.53    3.08
  -6   0  -9   -1.59    2.66
  -6   0 -10   20.85    8.11
   6   0  11    2.04    4.43
  -6   0 -11    8.09    4.03
  -6   2  12    6.97    4.08
   6   2 -12    6.71    3.35
   6  -2 -12   17.22    6.35
  -6  -2  12    9.15    3.04
  -6   2  11   19.83    5.52
   6   2 -11    2.94    3.95
   6  -2 -11    5.75    3.81
  -6  -2  11   11.30    5.70
   6   2 -10   82.42   12.40
  -6   2  10   85.29   14.57
  -6  -2  10   87.83   19.77
   6  -2 -10   98.31   19.18
  -6   2   9  301.84   20.50
   6   2  -9  312.57   24.90
  -6  -2   9  305.76   22.61
   6  -2  -9  294.55   26.57
  -6   2   8    6.83    3.44
   6   2  -8    2.57    2.50
   6  -2  -8   12.19    5.84
  -6  -2   8    6.00    3.69
  -6   2   7  199.27   17.40
   6   2  -7  181.89   14.92
  -6  -2   7  209.39   16.48
   6  -2  -7  193.64   19.06
  -6   2   6    8.90    2.95
   6   2  -6    1.41    2.76
   6  -2  -6    2.18    1.44
  -6  -2   6    1.84    2.96
  -6   2   5   21.15    4.28
   6   2  -5   12.37    2.80
   6   2  -5   17.32    2.89
  -6  -2   5   18.59    3.48
   6  -2  -5   11.05    2.96
   6  -2  -5   14.42    2.75
  -6  -2   5    9.04    2.04
  -6   2   4  876.99   16.42
  -6   2   4  613.10   12.09
   6   2  -4  843.14   15.69
   6   2  -4  770.52   15.48
  -6  -2   4  882.00   17.52
  -6  -2   4  636.46   12.34
   6  -2  -4  690.00   13.67
   6  -2  -4  865.44   16.31
  -6   2   3  816.08   15.73
  -6   2   3  557.92   11.49
   6   2  -3  817.53   15.79
   6   2  -3  691.54   14.41
  -6  -2   3  812.12   16.82
   6  -2  -3  646.85   13.10
  -6  -2   3  590.18   11.91
   6  -2  -3  817.27   15.65
  -6   2   2   28.64    4.92
   6   2  -2   18.73    2.73
   6   2  -2   20.75    3.92
  -6  -2   2   23.67    3.53
   6  -2  -2   31.05    4.54
   6  -2  -2   19.38    2.74
  -6  -2   2   22.65    2.72
   6   2  -1  184.28    9.54
  -6   2   1  173.92    8.62
   6   2  -1  229.75   11.12
   6  -2  -1  249.72   11.80
  -6  -2   1  159.47    8.29
   6  -2  -1  173.18    8.64
  -6   2   0  106.54    6.38
   6   2   0  116.38    5.81
   6   2   0   72.27    3.93
   6   2   0   64.98    3.76
   6  -2   0  100.72    6.01
  -6  -2   0   98.82    5.49
   6  -2   0   78.79    4.09
   6   2   1  581.77   10.52
  -6   2  -1  819.50   14.20
   6  -2   1  591.06   10.31
   6  -2   1  535.87    9.56
   6  -2   1  437.13    8.08
   6   2   2  358.66    7.88
   6   2   2  340.95    7.08
   6   2   2  298.27    7.68
  -6   2  -2  291.39    6.57
   6  -2   2  358.26    9.31
  -6  -2  -2  373.46    7.67
   6  -2   2  307.59    6.95
   6  -2   2  317.63    7.06
   6   2   3   11.38    2.19
   6   2   3   14.27    2.59
   6   2   3   14.22    2.34
  -6   2  -3    6.21    1.56
   6  -2   3   19.72    3.51
  -6  -2  -3    9.62    1.71
   6  -2   3   12.90    3.14
   6  -2   3   14.37    1.91
   6   2   4   31.48    4.74
  -6   2  -4   17.97    3.24
   6   2   4   30.26    5.09
  -6   2  -4   16.52    1.95
   6   2   4   19.04    3.07
  -6  -2  -4   18.47    2.61
   6  -2   4   30.14    5.22
   6  -2   4   20.25    4.58
   6   2   5   21.43    3.69
  -6   2  -5   28.10    4.38
   6   2   5   19.05    3.38
   6  -2   5   29.98    3.78
  -6  -2  -5   19.99    2.91
   6  -2   5   22.00    3.16
   6   2   6   15.56    5.01
   6   2   6    6.51    2.13
  -6   2  -6   10.14    3.20
  -6  -2  -6   14.80    3.13
   6  -2   6    8.45    2.02
   6  -2   6    9.21    2.54
   6   2   7  339.17   27.71
  -6   2  -7  334.40   26.55
   6   2   7  294.73   23.23
   6  -2   7  318.17   25.53
  -6  -2  -7  327.20   25.92
   6   2   8  127.58   20.55
  -6   2  -8  152.18   10.87
   6  -2   8  109.26   16.48
  -6  -2  -8  153.12   10.67
   6   2   9   17.71    6.03
  -6   2  -9   19.00    5.04
   6  -2   9   20.61    4.70
  -6  -2  -9   16.46    4.58
  -6   2 -10   17.53    4.82
  -6  -2 -10   12.00    3.26
   6  -2  10   13.07    6.88
   6   2  11    8.82    5.20
  -6   2 -11    4.15    1.79
  -6  -2 -11    4.96    3.18
   6  -2  11   -0.41    4.39
  -6   4  11    1.13    2.71
   6   4 -11    7.76    3.77
  -6  -4  11    6.92    2.87
   6  -4 -11    4.39    3.04
   6   4 -10   24.63    6.63
  -6   4  10   27.48    5.29
  -6  -4  10   32.85    6.72
   6  -4 -10   34.44    9.39
   6   4  -9  206.29   20.73
  -6   4   9  166.47   23.70
  -6  -4   9  216.76   19.17
   6  -4  -9  198.18   28.15
   6   4  -8   24.22    7.94
  -6   4   8   11.22    3.86
  -6  -4   8   18.82    5.33
   6  -4  -8   12.77    4.96
  -6   4   7   98.72   12.87
   6   4  -7   94.85   10.48
  -6  -4   7  100.82    9.24
   6  -4  -7   67.37    8.76
  -6   4   6  197.55   14.56
   6   4  -6  160.38   11.21
  -6  -4   6  195.78   13.46
   6  -4  -6  176.94   14.81
  -6   4   5  248.84   15.46
   6   4  -5  219.26   13.83
  -6  -4   5  267.83   16.34
   6  -4  -5  228.25   13.78
   6  -4  -5  239.96   14.69
  -6   4   4   95.67    5.10
  -6   4   4   54.90    3.49
   6   4  -4   80.56    4.65
   6   4  -4   98.62    7.30
  -6  -4   4  108.04    6.16
   6  -4  -4   76.45    5.62
  -6  -4   4   75.42    8.73
   6  -4  -4   92.38    4.89
  -6   4   3  315.95    7.25
   6   4  -3  355.20    8.12
   6   4  -3  290.04    7.38
  -6  -4   3  354.48    8.61
   6  -4  -3  336.31    7.18
   6  -4  -3  272.95    6.84
  -6  -4   3  259.47    6.25
   6   4  -2    4.14    0.99
   6   4  -2    3.44    1.97
  -6   4   2    2.85    1.23
   6  -4  -2    2.25    1.79
  -6  -4   2    3.55    2.19
  -6  -4   2    4.20    1.81
   6  -4  -2    5.30    2.96
  -6   4   1   55.88    3.62
   6   4  -1   51.70    3.45
   6   4  -1   48.21    4.23
  -6  -4   1   52.16    7.94
   6  -4  -1   62.42    3.48
   6  -4  -1   86.99    5.65
   6  -4  -1   44.29    4.36
  -6   4   0   19.14    3.54
   6   4   0   18.70    2.48
   6   4   0   13.82    2.39
   6   4   0   15.32    2.30
   6  -4   0   14.63    2.48
  -6  -4   0   17.17    3.34
   6  -4   0   16.79    2.40
   6   4   1 1202.28   19.85
  -6   4  -1 1584.86   25.77
   6   4   1  968.77   15.48
   6   4   1  944.64   15.22
   6  -4   1 1053.42   17.12
   6  -4   1  945.43   15.84
   6  -4   1 1289.95   20.78
   6   4   2   19.77    3.81
   6   4   2    6.20    3.24
  -6   4  -2    7.09    2.04
   6   4   2    8.88    1.37
   6  -4   2    5.46    1.73
   6  -4   2    8.29    1.30
   6  -4   2    5.05    2.17
  -6  -4  -2   11.73    1.75
   6   4   3   87.59    6.56
   6   4   3   78.26    7.10
  -6   4  -3   42.50    3.08
   6   4   3   66.25    3.53
   6  -4   3   76.12    4.06
   6  -4   3   59.38    3.68
  -6  -4  -3   58.75    3.20
   6  -4   3   66.75    3.69
  -6   4  -4  337.46    9.47
   6   4   4  445.02   12.89
  -6   4  -4  399.15   10.82
   6   4   4  452.71   11.37
  -6  -4  -4  292.55    8.37
   6  -4   4  472.41   12.36
   6  -4   4  433.20   11.79
   6   4   5   38.41    7.13
  -6   4  -5   32.84    4.79
  -6   4  -5   38.89    5.62
   6   4   5   27.30    5.71
   6  -4   5   34.96    7.82
  -6  -4  -5   38.01    6.51
   6  -4   5   33.48    7.86
   6   4   6   22.07    4.97
  -6   4  -6   23.15    4.94
   6   4   6   16.58    3.95
   6  -4   6   24.48    5.17
  -6  -4  -6   13.82    3.38
   6   4   7  454.21   18.79
  -6   4  -7  504.04   20.22
   6   4   7  399.03   15.69
   6  -4   7  501.00   20.26
  -6  -4  -7  485.86   19.39
  -6   4  -8   50.85   11.71
   6   4   8   58.82   11.00
   6  -4   8   60.86    7.14
  -6  -4  -8   44.78    9.91
  -6   4  -9   24.21    5.91
   6   4   9   24.80    5.44
   6  -4   9   28.62    5.60
   6   4  10  187.29   30.00
  -6   4 -10  217.12   15.18
   6  -4  10  203.24   61.42
  -6  -4 -10  196.69   30.11
   6   4  11  101.26    9.81
  -6   4 -11   50.40   16.70
   6  -4  11   70.39    8.53
   6   6 -11   44.42   17.58
  -6   6  11   28.50   13.14
  -6  -6  11   51.99   11.50
   6  -6 -11   39.80   14.21
   6   6 -10   62.63   12.99
  -6   6  10   42.53   11.77
  -6  -6  10   47.56    9.54
   6  -6 -10   51.85    9.18
   6   6  -9    6.92    2.42
  -6   6   9   13.18    4.09
  -6  -6   9   10.30    4.13
   6  -6  -9    1.71    3.19
   6   6  -8  737.79   27.31
  -6   6   8  705.38   25.70
  -6  -6   8  783.25   28.90
   6  -6  -8  636.30   24.61
   6   6  -7  644.50   26.60
  -6   6   7  664.82   26.27
  -6  -6   7  653.15   26.93
   6  -6  -7  574.08   23.02
  -6   6   6 1545.03   45.88
   6   6  -6 1633.70   48.01
  -6  -6   6 1737.85   51.58
   6  -6  -6 1300.55   40.27
  -6   6   5   67.69    9.03
   6   6  -5   82.34    9.82
  -6  -6   5   82.56    7.47
   6  -6  -5   53.92    7.77
   6  -6  -5   75.24   11.39
   6   6  -4  150.13    7.58
  -6   6   4  176.58    8.44
   6   6  -4  149.02    7.22
  -6   6   4  111.40    6.17
  -6  -6   4  174.98    9.01
  -6  -6   4  120.62   10.42
   6  -6  -4  125.20    7.52
   6  -6  -4  176.79    8.29
  -6   6   3   45.23    3.16
   6   6  -3   52.98    5.44
   6   6  -3   55.71    6.46
  -6  -6   3   76.68   10.19
   6  -6  -3   52.58    5.03
   6  -6  -3   35.81    3.14
  -6  -6   3   38.19    2.82
   6   6  -2 3701.41   65.58
   6   6  -2 4615.08  192.83
  -6   6   2 3987.70   70.23
   6  -6  -2 4919.23  205.16
  -6  -6   2 4322.60   76.90
  -6  -6   2 3318.54   58.84
   6  -6  -2 3188.46  133.49
  -6   6   1  334.33   15.55
   6   6  -1  301.43   14.47
   6   6  -1  319.29   14.96
  -6  -6   1  286.33   13.99
   6  -6  -1  384.23   17.83
   6  -6  -1  437.77   20.73
  -6  -6   1  244.03   11.72
  -6   6   0 3281.38   50.34
   6   6   0 1978.29   31.57
   6  -6   0 2532.89   39.02
   6  -6   0 2638.46   41.39
  -6   6  -1   94.52    5.27
   6   6   1   77.80    7.26
   6   6   1   73.45    3.68
   6   6   1   76.32    3.76
   6  -6   1   67.89    3.83
  -6  -6  -1  100.71    8.89
   6  -6   1   77.98    8.78
   6  -6   1   99.02    5.12
   6   6   2  430.61    9.32
   6   6   2  437.52    8.20
   6   6   2  315.64    8.44
   6  -6   2  367.32    7.74
   6  -6   2  297.31    7.59
   6  -6   2  421.08   13.08
   6   6   3  374.83   16.73
   6   6   3  290.83   13.52
  -6   6  -3  229.68   10.83
   6   6   3  310.41   13.23
   6  -6   3  302.44   13.38
  -6  -6  -3  332.39   14.17
   6  -6   3  325.99   18.47
  -6   6  -4 2625.08   62.36
   6   6   4 3003.72  209.15
  -6   6  -4 3002.43  208.82
   6   6   4 2679.83   62.77
  -6  -6  -4 2467.66   57.85
   6  -6   4 3465.24  240.98
   6  -6   4 3322.71  231.08
  -6   6  -5  774.88   23.77
   6   6   5  783.88   24.32
  -6   6  -5  751.78   22.54
   6   6   5  805.97   23.57
   6  -6   5  832.28   25.12
  -6  -6  -5  723.10   21.24
   6   6   6  843.80   16.73
  -6   6  -6  884.91   16.36
   6   6   6  788.42   13.58
   6  -6   6  909.72   16.90
  -6  -6  -6  826.29   14.27
   6   6   7   47.49   10.35
   6   6   7   95.59   22.51
  -6   6  -7   78.44   15.92
  -6  -6  -7   56.13   14.21
   6  -6   7   95.49   20.79
  -6   6  -8  174.66   23.00
   6   6   8  187.52   17.26
   6  -6   8  173.29   16.31
  -6  -6  -8  156.35   14.17
  -6   6  -9   28.22    6.20
   6   6   9   27.19    5.82
   6  -6   9   29.80    5.29
  -6  -6  -9   27.97    7.04
  -6   6 -10  718.60   46.07
   6   6  10  662.53   43.00
   6  -6  10  738.74   47.55
  -6  -6 -10  659.73   42.60
   6   6  11  119.67   10.66
  -6   6 -11   56.94   20.92
   6  -6  11   81.27   23.54
   6   8 -11   78.14   18.25
  -6   8  11   66.04   12.72
  -6  -8  11   61.23   16.55
   6  -8 -11   46.78   15.95
   6   8 -10    9.11    3.79
  -6   8  10    4.61    3.09
  -6  -8  10   -0.92    4.68
   6  -8 -10   -4.53    3.48
   6   8  -9   25.82    4.75
  -6   8   9   11.78    4.70
  -6  -8   9   17.87    5.43
   6  -8  -9   19.35    4.03
   6   8  -8   66.03   13.65
  -6   8   8   52.11    9.81
  -6  -8   8   52.60   14.83
   6  -8  -8   66.70   13.51
   6   8  -7  684.52   27.11
  -6   8   7  612.22   26.71
  -6  -8   7  677.48   26.65
   6  -8  -7  521.32   22.12
  -6   8   6   40.11    6.57
   6   8  -6   43.76    9.82
  -6  -8   6   43.77    6.44
   6  -8  -6   17.44    4.46
   6  -8  -6   24.06    3.88
  -6   8   5   16.08    2.73
   6   8  -5   15.46    2.71
  -6  -8   5   18.69    3.50
   6  -8  -5   10.12    2.70
   6  -8  -5   16.37    2.83
   6   8  -4  107.10    7.20
  -6   8   4   99.35    6.77
   6   8  -4   99.25    9.89
   6  -8  -4  100.21    7.49
  -6  -8   4  103.74    7.54
  -6  -8   4   86.64    7.53
   6  -8  -4   90.23   13.50
  -6   8   3   77.10    4.04
   6   8  -3   85.61    4.80
   6   8  -3   82.55    5.49
  -6  -8   3   96.71    7.41
   6  -8  -3   84.00    5.81
  -6  -8   3   67.35    3.90
   6  -8  -3   78.81   10.42
  -6   8   2   33.03    2.24
   6   8  -2   25.87    2.44
   6   8  -2   40.69    7.26
  -6  -8   2   44.08    5.60
   6  -8  -2   44.14    5.82
   6  -8  -2   34.00    3.65
  -6  -8   2   32.61    3.29
   6  -8  -2   26.87    3.91
  -6   8   1 2133.56   37.67
   6   8  -1 1941.27   34.63
  -6  -8   1 1632.60   30.70
   6  -8  -1 2329.32   42.61
   6  -8  -1 2028.38   35.84
  -6  -8   1 1437.88   25.82
   6   8   0    5.57    2.46
   6   8   0    3.70    1.11
  -6  -8   0    4.01    1.44
   6  -8   0    1.97    0.86
   6  -8   0    3.85    2.58
   6  -8   0    2.01    0.81
  -6   8  -1  138.23    7.52
   6   8   1  116.80    6.41
   6   8   1  121.66    5.68
   6   8   1  136.72    6.43
   6  -8   1  108.80    5.84
  -6  -8  -1  143.62   11.91
   6  -8   1  110.13    9.09
   6  -8   1  131.34    6.73
  -6   8  -2  197.13    9.41
   6   8   2  286.24   12.89
   6   8   2  202.37    9.77
   6  -8   2  268.71   12.06
   6  -8   2  276.44   12.08
   6  -8   2  202.59   13.89
   6   8   3    6.46    2.31
  -6   8  -3    5.54    3.08
   6   8   3    8.83    3.83
  -6   8  -3    4.94    1.75
   6   8   3    3.76    0.75
  -6  -8  -3    9.27    1.26
   6  -8   3    6.42    1.75
   6  -8   3    3.80    1.34
  -6   8  -4   38.85    6.35
  -6   8  -4   38.97    3.49
   6   8   4   62.95   10.99
   6   8   4   41.78    4.67
  -6  -8  -4   34.56    4.10
   6  -8   4   38.64    6.74
   6  -8   4   55.50    6.84
  -6   8  -5  445.93   14.75
   6   8   5  505.23   16.50
  -6   8  -5  396.30   12.81
   6   8   5  466.15   13.86
   6  -8   5  516.82   18.65
  -6  -8  -5  412.34   12.37
   6   8   6    2.51    1.39
   6   8   6    6.67    2.24
  -6   8  -6    5.57    1.68
  -6  -8  -6    8.45    1.62
   6  -8   6    9.53    3.46
   6   8   7    0.48    1.11
   6   8   7    3.51    3.07
  -6   8  -7   -4.98    2.75
  -6  -8  -7    2.85    1.16
   6  -8   7    5.32    3.01
  -6   8  -8    3.90    3.48
   6   8   8    9.18    3.82
   6  -8   8   12.38    5.19
  -6  -8  -8   10.80    2.74
  -6   8  -9  155.79   19.22
   6   8   9  121.58   23.28
   6  -8   9  159.14   17.27
  -6  -8  -9  146.88   15.76
  -6   8 -10    2.39    3.93
   6   8  10   10.21    5.08
   6  -8  10   -0.16    3.58
   6  10 -11  149.72   26.69
  -6  10  11  123.69   26.72
  -6 -10  11  161.59   31.03
   6 -10 -11  118.25   28.00
   6  10 -10   54.26   12.13
  -6  10  10   49.58   12.91
  -6 -10  10   71.91   10.54
   6 -10 -10   50.53   11.67
   6  10  -9  205.50   20.26
  -6  10   9  221.95   21.77
  -6 -10   9  235.55   23.73
   6 -10  -9  197.44   25.77
   6  10  -8  180.78   18.65
  -6  10   8  164.15   16.86
  -6 -10   8  176.38   19.84
   6 -10  -8  154.68   13.26
   6  10  -7  451.33   18.65
  -6  10   7  373.16   81.70
  -6 -10   7  449.33   20.41
   6 -10  -7  375.37   18.99
  -6  10   6 1004.43   17.56
   6  10  -6 1048.53   20.69
  -6 -10   6 1137.41   21.00
   6 -10  -6 1039.58   17.97
   6 -10  -6  837.22   17.54
  -6  10   5  564.02   17.38
   6  10  -5  601.14   19.23
  -6 -10   5  611.72   19.43
   6 -10  -5  579.72   15.41
   6 -10  -5  463.08   14.91
  -6  10   4    9.68    1.96
   6  10  -4   11.30    2.00
  -6 -10   4   21.64    4.02
   6 -10  -4    8.47    1.58
  -6 -10   4    4.10    1.79
   6 -10  -4    0.85    2.32
   6  10  -3  853.30   15.75
   6  10  -3  777.39   15.30
  -6  10   3  719.60   12.98
   6 -10  -3  795.84   14.11
  -6 -10   3  820.81   18.51
  -6 -10   3  640.05   12.06
   6 -10  -3  564.37   12.11
  -6  10   2  737.79   12.77
   6  10  -2  705.51   13.59
   6  10  -2  732.02   13.50
  -6 -10   2  745.80   14.75
   6 -10  -2 1026.67   18.77
   6 -10  -2  742.66   12.86
  -6 -10   2  650.79   11.88
   6 -10  -2  533.13   13.85
  -6  10   1 1437.28   25.36
   6  10  -1 1180.52   21.82
   6  10  -1  926.71   18.06
   6 -10  -1 1032.11   18.42
   6 -10  -1 1342.03   25.20
  -6 -10   1 1037.18   20.71
  -6 -10   1  881.74   16.18
  -6  10   0 1559.13   29.21
   6  10   0 1207.83   22.93
   6  10   0 1481.03   26.25
   6 -10   0 1397.55   24.71
  -6 -10   0 1301.42   24.75
   6 -10   0 1377.03   25.75
   6 -10   0 1472.99   25.99
  -6  10  -1  682.10   13.73
   6  10   1  630.48   12.41
   6 -10   1  662.95   11.54
   6 -10   1  723.20   12.54
  -6 -10  -1  738.01   14.35
   6 -10   1  621.83   12.13
   6  10   2   37.34    3.60
  -6  10  -2   46.16    6.65
   6 -10   2   32.08    4.37
   6 -10   2   43.08    4.60
   6 -10   2   28.41    3.19
  -6  10  -3  425.36   10.92
   6  10   3  448.82   12.88
  -6  10  -3  446.05   12.36
   6 -10   3  521.44   13.41
   6 -10   3  445.60   12.26
   6  10   4  527.93   12.79
  -6  10  -4  652.72   16.62
   6  10   4  659.31   17.85
  -6  10  -4  595.36   15.99
   6 -10   4  760.84   19.58
  -6  10  -5  590.52   12.52
   6  10   5  598.57   15.13
  -6  10  -5  583.45   11.00
   6  10   5  526.69    8.92
   6 -10   5  685.61   13.73
  -6 -10  -5  552.94    9.45
   6  10   6   19.48    4.67
   6  10   6   39.48    7.11
  -6  10  -6   31.26    6.95
  -6 -10  -6   26.51    4.58
   6 -10   6   45.76    8.01
   6  10   7  112.26   11.69
   6  10   7  150.91   23.95
  -6  10  -7  175.68   23.15
  -6 -10  -7  145.45   14.63
   6 -10   7  168.79   22.91
  -6  10  -8   10.70    3.64
   6  10   8   11.66    3.72
   6 -10   8   10.14    5.13
  -6 -10  -8    4.99    2.31
  -6  10  -9  303.44   18.07
   6  10   9  226.42   29.02
   6 -10   9  294.69   16.95
  -6 -10  -9  250.71   28.86
  -6  10 -10  380.14   32.27
   6  10  10  348.44   30.00
   6 -10  10  372.77   31.61
   6  12 -11  149.23   26.08
  -6  12  11  103.52   24.13
  -6 -12  11  114.72   28.46
   6 -12 -11  121.74   24.26
   6  12 -10  116.36   25.65
  -6  12  10   70.98   24.81
  -6 -12  10   73.08   22.87
   6 -12 -10   91.67   22.88
   6  12  -9  632.92   27.64
  -6  12   9  570.47   23.78
  -6 -12   9  580.13   24.89
   6 -12  -9  509.64   23.34
   6  12  -8   63.60    7.37
  -6  12   8   32.08    7.90
  -6 -12   8   42.64   12.05
   6 -12  -8   46.11    8.13
   6  12  -7  289.32   23.44
  -6  12   7  239.35   20.30
  -6 -12   7  226.65   19.22
   6 -12  -7  227.92   18.87
  -6  12   6  134.37   10.69
   6  12  -6  173.15   18.13
  -6 -12   6  171.47   20.77
   6 -12  -6   98.53   11.79
   6 -12  -6  133.88   11.82
  -6  12   5  568.94   17.52
   6  12  -5  657.13   20.79
  -6 -12   5  611.91   19.46
   6 -12  -5  560.23   17.02
   6 -12  -5  435.36   17.14
  -6  12   4  301.17   15.60
   6  12  -4  339.81   19.45
  -6 -12   4  331.06   17.68
   6 -12  -4  305.75   15.82
  -6 -12   4  261.98   14.81
   6 -12  -4  249.58   16.43
  -6  12   3  893.70   21.41
   6  12  -3 1027.80   25.53
  -6 -12   3 1003.98   25.36
   6 -12  -3  998.41   23.94
  -6 -12   3  875.85   21.56
   6 -12  -3  704.42   19.93
   6  12  -2   57.04    3.77
  -6  12   2   61.84    3.94
   6  12  -2   70.20    5.50
  -6 -12   2   72.23    6.96
   6 -12  -2   86.65    7.53
   6 -12  -2   62.24    4.67
  -6 -12   2   56.31    5.26
   6 -12  -2   58.11    5.07
   6  12  -1   78.23    8.05
   6  12  -1   82.00    4.02
  -6 -12   1   76.96    6.60
   6 -12  -1   88.09    5.76
  -6 -12   1   64.15    6.18
   6  12   0  205.32    8.82
   6  12   0  179.27   14.38
  -6  12   0  212.23   11.30
   6 -12   0  179.84    8.54
  -6 -12   0  191.85    9.72
  -6 -12   0  135.75    5.89
   6  12   1  565.10   11.49
  -6  12  -1  557.71   13.52
  -6 -12  -1  675.16   13.75
   6 -12   1  595.73   10.18
   6 -12   1  604.46   12.07
  -6  12  -2  328.65    9.83
  -6 -12  -2  396.92   14.88
   6 -12   2  364.86    9.59
   6 -12   2  310.10   18.43
   6  12   3  526.25   18.16
  -6  12  -3  486.87   12.72
  -6  12  -3  602.00   16.32
   6 -12   3  672.21   17.38
   6  12   4    6.02    2.83
  -6  12  -4    1.15    1.18
  -6  12  -4    1.94    2.91
   6 -12   4    5.56    2.55
  -6  12  -5    4.00    2.56
   6  12   5    3.44    3.06
  -6  12  -5    6.28    2.50
   6  12   5    1.10    0.55
   6 -12   5   -2.21    2.03
  -6 -12  -5    1.00    0.63
   6  12   6   43.88    8.28
   6  12   6   83.72   17.72
  -6  12  -6   59.21   10.04
  -6 -12  -6   64.39   10.20
   6 -12   6   82.56   13.52
  -6  12  -7  569.80   28.93
   6  12   7  531.50   27.29
   6 -12   7  623.67   31.13
  -6 -12  -7  490.97   24.06
  -6  12  -8   53.61    8.41
   6  12   8   58.24    7.16
   6 -12   8   47.06   11.02
  -6 -12  -8   26.35    8.48
  -6  12  -9   40.85    9.79
   6  12   9   11.26    4.80
   6 -12   9   30.64    6.29
  -6  12 -10   13.18    4.85
   6  12  10    8.78    4.20
   6 -12  10   -0.51    3.08
   6  14 -11   36.91    7.97
  -6  14  11   18.51    8.03
  -6 -14  11   31.71   11.09
   6 -14 -11   17.22    5.57
   6  14 -10   97.14   27.99
  -6  14  10   68.31   22.89
  -6 -14  10  133.05   30.66
   6 -14 -10   88.41   17.64
   6  14  -9  256.31   27.15
  -6  14   9  239.30   25.58
  -6 -14   9  263.08   28.00
   6 -14  -9  179.57   25.32
   6  14  -8   72.64    4.54
  -6  14   8   75.28    4.38
  -6 -14   8   94.44   10.02
   6 -14  -8   80.67   15.36
   6  14  -7   10.46    3.49
  -6  14   7    0.24    2.59
  -6 -14   7   11.29    7.04
   6 -14  -7   13.58    5.55
  -6  14   6  166.21   16.07
   6  14  -6  184.58   22.85
  -6 -14   6  195.35   23.83
   6 -14  -6  132.45   15.53
   6 -14  -6  148.72   19.56
  -6  14   5  119.30    9.46
   6  14  -5  161.02   17.00
  -6 -14   5  168.04   17.11
   6 -14  -5  111.31   11.02
   6 -14  -5  100.05   13.91
  -6  14   4  338.71   51.06
   6  14  -4  425.31   13.62
  -6 -14   4  427.50   14.42
   6 -14  -4  382.37   11.74
  -6 -14   4  325.83   21.51
   6 -14  -4  296.00   14.48
  -6  14   3  149.38    7.91
   6  14  -3  179.12    9.76
  -6 -14   3  170.66   10.21
   6 -14  -3  148.06    9.70
  -6 -14   3  125.87   13.60
   6 -14  -3  130.03   14.20
   6  14  -2   87.76    7.56
   6 -14  -2   63.34    4.95
  -6 -14   2   73.17    5.95
  -6 -14   2   52.72    6.82
   6  14  -1  110.64    7.66
  -6 -14   1  122.85   13.23
  -6 -14   1   71.28    7.28
   6  14   0   57.11    4.57
  -6  14   0   72.11   11.00
  -6 -14   0   65.66    9.65
  -6 -14   0   33.16    3.29
  -6  14  -1  428.51   12.56
  -6 -14  -1  518.86   14.39
  -6  14  -2  478.58   13.95
   6 -14   2  555.50   13.79
  -6 -14  -2  535.83   14.95
   6  14   3  125.91   15.39
  -6  14  -3   87.51    8.24
  -6  14  -3  144.75   16.43
   6 -14   3  135.01   10.02
   6  14   4  129.18   10.81
  -6  14  -4  112.50   12.43
  -6  14  -4  139.57   11.29
   6 -14   4  176.81   14.40
  -6  14  -5   35.64    4.81
   6  14   5   38.57    6.75
  -6  14  -5   34.90    5.64
   6 -14   5   38.51    6.49
  -6  14  -6   14.08    4.54
   6  14   6   -0.61    3.25
   6 -14   6   14.70    4.88
  -6 -14  -6   11.40    3.48
  -6  14  -7  276.26   13.12
   6  14   7  243.08   13.34
   6 -14   7  281.03   16.14
  -6 -14  -7  240.23   20.07
  -6  14  -8   25.50    6.27
   6  14   8   27.11    6.61
   6 -14   8   24.68    7.79
  -6  14  -9   43.72   11.79
   6  14   9   44.03   12.54
   6 -14   9   37.40   14.30
  -6  14 -10   99.28   24.27
   6  14  10   89.38   16.72
   6 -14  10   60.31   25.18
   6  16 -10  396.77   34.47
  -6  16  10  293.39   25.67
  -6 -16  10  414.66   35.65
   6 -16 -10  318.31   27.77
   6  16  -9    0.03    3.62
  -6  16   9   -2.71    3.02
  -6 -16   9    3.97    3.34
   6 -16  -9   -2.10    3.51
   6  16  -8  438.82   19.25
  -6  16   8  328.38   15.27
  -6 -16   8  433.99   19.36
   6 -16  -8  297.95   23.51
   6  16  -7  470.08   24.10
  -6  16   7  370.48   21.22
  -6 -16   7  515.23   26.63
   6 -16  -7  344.21   20.25
  -6  16   6  121.74   10.34
   6  16  -6  147.59   15.14
  -6 -16   6  164.61   20.56
   6 -16  -6   77.50   15.54
   6 -16  -6  119.38   15.65
  -6  16   5  636.71   24.22
   6  16  -5  828.22   31.86
  -6 -16   5  839.94   34.29
   6 -16  -5  686.95   26.02
   6 -16  -5  495.86   20.12
  -6  16   4 1699.85   48.84
   6  16  -4 2127.81   61.61
  -6 -16   4 2063.34  309.39
   6 -16  -4 1802.66   51.79
  -6 -16   4 1564.83   45.47
   6 -16  -4 1287.87  193.57
  -6  16   3  571.30   16.66
   6  16  -3  787.67   23.71
  -6 -16   3  707.90   22.24
   6 -16  -3  637.63   18.63
  -6 -16   3  585.85   17.69
   6 -16  -3  480.26   22.62
   6  16  -2  227.96   12.02
  -6 -16   2  178.31   10.43
  -6 -16   2  160.82   10.39
   6  16  -1 1158.51   28.14
  -6 -16   1 1054.26   27.73
  -6 -16   1  836.97   20.50
   6  16   0  520.95   12.78
  -6  16   0  503.37   18.55
  -6 -16   0  586.21   16.84
  -6 -16   0  448.74   11.07
  -6  16  -1  173.69   12.91
  -6 -16  -1  218.51   22.25
  -6  16  -2 2200.87  329.91
   6 -16   2 2232.42   63.54
   6 -16   2 2807.91  420.59
  -6 -16  -2 2257.40  338.40
   6  16   3  563.74   18.27
  -6  16  -3  587.40   17.32
  -6  16  -3  849.53   26.12
   6 -16   3  922.89   26.91
   6  16   4    8.75    3.18
  -6  16  -4   12.37    2.84
  -6  16  -4   27.32    5.48
   6 -16   4   20.97    4.51
  -6  16  -5  340.50   13.78
   6  16   5  392.30   16.76
  -6  16  -5  402.47   18.63
   6 -16   5  491.16   19.63
  -6  16  -6  520.18   26.90
   6  16   6  504.45   26.41
   6 -16   6  618.40   31.43
  -6 -16  -6  497.92   24.01
  -6  16  -7   11.33    3.93
   6  16   7    5.05    3.80
   6 -16   7   19.53    3.70
  -6  16  -8  667.07   32.04
   6  16   8  582.97   28.61
   6 -16   8  733.13   34.67
  -6  16  -9  329.18   28.30
   6  16   9  300.79   29.98
   6 -16   9  351.37   29.73
  -6  16 -10   18.32    8.17
   6  16  10   16.74    7.26
   6 -16  10   21.95    6.34
   6  18 -10   -2.36    3.75
  -6  18  10    5.97    3.37
  -6 -18  10    5.85    4.82
   6 -18 -10   -0.13    3.63
   6  18  -9    2.10    2.95
  -6  18   9    5.80    2.61
  -6 -18   9    6.56    4.44
   6 -18  -9    6.36    4.93
   6  18  -8    8.64    3.09
  -6  18   8    1.29    1.99
  -6 -18   8    6.17    4.10
   6 -18  -8   10.65    5.32
   6  18  -7  576.54   24.49
  -6  18   7  463.75   19.80
  -6 -18   7  583.24   25.70
   6 -18  -7  406.28   28.08
  -6  18   6    8.62    3.22
   6  18  -6   15.90    5.43
  -6 -18   6   12.86    4.78
   6 -18  -6    4.06    2.20
   6 -18  -6   12.41    6.04
  -6  18   5   42.04    9.00
   6  18  -5   63.06   10.50
  -6 -18   5   54.70   10.01
   6 -18  -5   40.35    8.31
   6 -18  -5   29.56    6.20
  -6  18   4   18.12    3.65
   6  18  -4   18.82    3.87
  -6 -18   4    3.62    3.21
   6 -18  -4   11.98    2.50
   6 -18  -4   19.47    3.94
  -6  18   3  210.69   13.48
   6  18  -3  195.27   13.36
  -6  18   3  136.08    8.79
  -6 -18   3  182.38   20.45
  -6 -18   3  126.69    9.83
   6 -18  -3  105.94    8.40
   6  18  -2   21.91    3.46
  -6 -18   2   17.16    4.12
  -6 -18   2   10.63    2.39
   6  18  -1  587.04   17.45
  -6 -18   1  583.44   18.97
  -6 -18   1  452.62   13.69
   6  18   0    9.34    1.55
  -6  18   0   10.49    3.54
  -6 -18   0   17.69    4.33
  -6 -18   0    4.34    0.81
  -6  18  -1  228.72   16.77
  -6 -18  -1  258.61   21.44
  -6  18  -2   15.64    3.72
  -6 -18  -2   10.75    3.90
   6 -18   2    6.78    1.22
   6 -18   2    3.36    1.01
   6  18   3   69.35    6.76
  -6  18  -3   69.48    5.36
  -6  18  -3  106.42    9.93
   6 -18   3  119.38   10.58
  -6  18  -4   11.49    2.05
   6  18   4   18.04    4.18
  -6  18  -4   34.95    6.04
   6 -18   4   12.16    2.42
  -6  18  -5  275.42   52.78
   6  18   5  273.11   56.85
  -6  18  -5  325.08   13.88
   6 -18   5  411.01   15.92
  -6  18  -6    1.73    2.44
   6  18   6    5.64    3.55
   6 -18   6    4.41    2.10
  -6  18  -7   62.50   13.84
   6  18   7   54.09   12.96
   6 -18   7   71.11   16.00
  -6  18  -8   -0.64    4.02
   6  18   8    5.42    3.80
   6 -18   8    1.84    2.85
  -6  18  -9    1.92    4.44
   6  18   9    5.85    3.67
   6 -18   9    7.86    3.86
   6  20 -10   30.29   11.13
  -6  20  10   19.18    7.45
  -6 -20  10   42.76   15.62
   6 -20 -10   23.37   12.30
   6  20  -9    4.04    3.53
  -6  20   9    2.38    2.29
  -6 -20   9   10.31    6.47
   6 -20  -9    6.88    3.93
   6  20  -8  114.91   16.77
  -6  20   8   91.51   10.93
  -6 -20   8   72.28   21.01
   6 -20  -8   71.77    9.46
   6  20  -7    8.56    3.62
  -6  20   7    1.28    1.52
  -6 -20   7    4.58    3.79
   6 -20  -7    9.02    3.81
   6  20  -6  654.51   32.74
  -6  20   6  453.50   23.67
  -6 -20   6  620.89   31.56
   6 -20  -6  401.02   28.04
  -6  20   5   32.31    6.03
   6  20  -5   54.66    9.67
  -6 -20   5   44.47    7.91
   6 -20  -5   22.50    4.52
   6 -20  -5   31.73    6.32
  -6  20   4  364.08   13.86
   6  20  -4  345.64   19.65
  -6  20   4  231.81    9.17
  -6 -20   4  285.53   26.04
   6 -20  -4  212.67   22.40
  -6  20   3   12.61    2.67
  -6  20   3   13.90    2.88
   6  20  -3   17.94    3.67
  -6 -20   3   24.17    5.66
  -6 -20   3    8.68    2.02
   6 -20  -3   17.19    4.33
   6  20  -2  166.82   12.65
  -6 -20   2  160.21   19.16
  -6 -20   2  113.63   11.18
   6  20  -1  107.03   10.08
  -6 -20   1   99.66    8.80
  -6 -20   1   51.01   10.65
  -6  20   0  473.79   22.99
   6  20   0  456.35    7.93
  -6 -20   0  495.42   12.17
  -6 -20   0  369.30    6.78
  -6  20  -1    4.84    2.18
  -6 -20  -1    5.65    1.91
  -6 -20  -1    0.93    0.38
  -6  20  -2    5.79    2.16
   6 -20   2    0.79    0.49
   6 -20   2    1.09    0.56
  -6 -20  -2    3.41    1.80
   6  20   3    7.55    3.13
  -6  20  -3    0.69    1.05
  -6  20  -3    3.37    2.13
   6 -20   3    6.27    1.74
   6  20   4  435.95   18.21
  -6  20  -4  455.98   17.42
  -6  20  -4  665.74   27.80
   6 -20   4  758.13   28.68
  -6  20  -5   87.67    9.03
   6  20   5   61.99    8.61
   6 -20   5   93.61    8.08
  -6  20  -6   83.17   13.22
   6  20   6   64.48   13.92
   6 -20   6   82.06    7.12
  -6  20  -7    6.07    4.43
   6  20   7    1.20    3.75
   6 -20   7    6.77    3.77
  -6  20  -8   24.43    9.37
   6  20   8   15.33    6.28
   6 -20   8    8.73    5.22
  -6  20  -9    5.30    6.38
   6  20   9   12.30    4.51
   6 -20   9    5.24    4.16
   6  22  -9  296.08   28.60
  -6  22   9  163.30   30.33
  -6 -22   9  316.83   30.12
   6 -22  -9  187.30   20.56
   6  22  -8  422.65   24.21
  -6  22   8  259.10   16.62
  -6 -22   8  412.29   25.56
   6 -22  -8  261.63   20.88
   6  22  -7  350.23   17.76
  -6  22   7  222.45   24.37
  -6 -22   7  305.38   32.29
   6 -22  -7  225.32   12.55
   6  22  -6  635.22   28.32
  -6  22   6  423.36   19.10
  -6 -22   6  649.16   27.76
   6 -22  -6  378.18   23.15
   6  22  -5  302.32   24.21
  -6  22   5  208.41   13.84
  -6 -22   5  294.71   24.70
   6 -22  -5  174.47   12.50
  -6  22   4  460.62   16.10
   6  22  -4  431.91   16.35
  -6  22   4  295.57   56.50
  -6 -22   4  377.04   18.77
   6 -22  -4  248.83   12.47
   6  22  -3 1188.57   44.80
  -6 -22   3  963.71   37.46
  -6 -22   3  813.49   30.89
   6 -22  -3  534.82   25.46
   6  22  -2 2041.81   75.55
  -6 -22   2 2039.12   76.63
  -6 -22   2 1574.07   58.45
   6  22  -1  127.74   13.40
  -6 -22   1  179.74   23.41
  -6 -22   1  117.99   11.21
  -6  22   0 1099.12   42.30
   6  22   0 1172.51   43.35
  -6 -22   0 1305.05   49.62
  -6 -22   0  877.04   32.54
  -6  22  -1  340.65   23.64
  -6 -22  -1  376.02   24.46
  -6 -22  -1  221.01   20.29
  -6  22  -2  222.28   21.88
  -6 -22  -2  157.27   24.84
   6  22   3  192.21   16.14
  -6  22  -3  174.89   13.99
  -6  22  -3  341.67   33.36
   6 -22   3  296.89   23.11
  -6  22  -4  646.19   33.67
   6  22   4  403.68   27.25
   6 -22   4  710.26   34.54
  -6  22  -5  109.54   11.63
   6  22   5   69.91    9.62
   6 -22   5  104.88   14.58
  -6  22  -6  558.07   24.36
   6  22   6  377.03   17.73
   6 -22   6  648.64   26.31
  -6  22  -7  428.26   23.91
   6  22   7  343.70   20.82
   6 -22   7  529.55   28.16
  -6  22  -8  380.92   32.72
   6  22   8  290.11   26.70
   6 -22   8  438.06   36.67
   6  24  -9   14.99    7.29
  -6 -24   9    6.34    4.22
   6 -24  -9   12.78   10.02
   6  24  -8   10.93    4.46
  -6  24   8    2.29    2.32
  -6 -24   8    1.31    2.49
   6 -24  -8    4.31    2.35
   6  24  -7   45.52   11.68
  -6  24   7   25.17    6.95
  -6 -24   7   34.92    7.13
   6  24  -6    5.65    4.09
  -6  24   6    2.73    1.70
  -6 -24   6    5.39    2.62
   6 -24  -6    2.12    2.63
   6  24  -5    6.60    2.19
  -6  24   5    1.19    1.34
  -6 -24   5    8.58    3.41
   6 -24  -5   -0.13    2.60
   6  24  -4  622.14   30.96
  -6  24   4  410.24   19.93
  -6 -24   4  518.78   28.12
   6 -24  -4  311.42   21.37
   6  24  -3    6.66    2.66
  -6 -24   3    5.60    4.21
   6 -24  -3    4.01    3.17
   6  24  -2   44.67    9.28
  -6 -24   2   50.72   10.21
  -6 -24   2   17.40    5.30
   6  24  -1  421.72   16.46
  -6 -24   1  549.36   28.56
  -6 -24   1  381.62   14.77
  -6  24   0   16.33    5.43
   6  24   0   14.73    3.81
  -6 -24   0   11.71    4.08
  -6  24  -1  335.10   32.14
  -6 -24  -1  327.08   31.92
  -6 -24  -1  210.75   16.37
   6  24   2  383.04   16.17
  -6  24  -2  574.47   26.00
  -6  24  -3    4.63    1.92
   6  24   3    1.58    2.83
   6 -24   3    1.00    0.78
  -6  24  -4    7.88    3.05
   6  24   4    5.43    3.18
   6 -24   4    6.43    1.91
  -6  24  -5   62.05   12.84
   6  24   5   32.74    4.56
   6 -24   5   33.48    9.43
  -6  24  -6   31.60    7.85
   6  24   6   11.19    5.20
   6 -24   6   12.28    4.06
   6  24   7   12.10    4.93
  -6  24  -7   26.64    7.77
   6  24   8   98.58   31.17
  -6  24  -8  162.58   23.81
   6  26  -8   12.01    5.57
  -6 -26   8    5.20    3.44
   6 -26  -8    4.61    2.57
   6  26  -7   88.91   17.49
  -6 -26   7   56.52   20.15
   6 -26  -7   46.08    9.30
   6  26  -6    1.94    3.45
  -6 -26   6    6.92    4.90
   6 -26  -6    8.38    4.33
   6  26  -5  115.21   18.41
  -6 -26   5  105.13   11.73
   6 -26  -5   48.58   13.54
   6  26  -4   16.50    3.36
  -6 -26   4   19.52    4.25
   6 -26  -4    7.17    2.23
   6  26  -3  478.36   25.14
  -6 -26   3  462.32   28.49
   6 -26  -3  200.54   22.53
   6  26  -2   57.95    8.61
  -6 -26   2   75.27   10.10
  -6 -26   2   53.67    5.13
   6  26  -1    0.45    0.96
  -6 -26   1    6.49    3.04
  -6 -26   1    3.22    1.61
  -6  26   0    5.32    2.21
   6  26   0    3.77    1.35
  -6 -26   0    1.52    3.57
  -6  26  -1  698.71   36.34
  -6 -26  -1  754.44   37.67
   6  26   2   74.35   11.38
  -6  26  -2  102.52   14.19
   6  26   3  218.21   18.83
  -6  26  -3  299.52   51.94
   6  26   4    5.44    2.17
  -6  26  -4    1.03    3.50
   6  26   5    6.94    3.69
  -6  26  -5   21.33    7.14
   6  26   6   -3.37    3.78
  -6  26  -6    2.46    3.45
   6  26   7  129.55   32.35
  -6  26  -7  235.98   21.61
   6  28  -8   44.11   18.90
  -6 -28   8   44.46   18.16
   6 -28  -8   40.51   11.13
   6  28  -7   68.48   23.82
  -6 -28   7   64.52   20.05
   6 -28  -7   56.21   16.26
   6  28  -6  447.32   29.33
  -6 -28   6  412.89   27.44
   6 -28  -6  193.55   25.55
   6  28  -5   52.76   13.17
  -6 -28   5   55.81   10.48
   6 -28  -5   29.73    9.08
   6  28  -4   94.11   14.01
  -6 -28   4   97.44   20.78
   6 -28  -4   54.33   12.18
   6  28  -3   34.80    6.16
  -6 -28   3   28.20    6.94
   6 -28  -3   13.13    4.95
   6  28  -2  375.98   16.06
  -6 -28   2  478.62   21.44
   6  28  -1  175.24   17.54
  -6 -28   1  179.85   28.72
   6  28   0  514.40   20.93
  -6 -28   0  606.16   28.52
  -6  28  -1  162.44   21.04
  -6 -28  -1  135.00   17.67
   6  28   2   62.56   11.06
  -6  28  -2   95.53   11.74
   6  28   3   73.12   11.35
  -6  28  -3   96.79   16.95
   6  28   4  337.99   28.26
  -6  28  -4  531.24   26.37
   6  28   5  177.16   20.08
  -6  28  -5  280.46   20.49
   6  28   6   80.37   17.09
  -6  28  -6   78.75   29.38
   6  28   7  125.74   10.70
  -6  28  -7  167.38   13.39
   6  30  -7   40.11   10.29
  -6 -30   7   34.06    8.65
   6 -30  -7   19.50    6.45
   6  30  -6  291.08   24.93
  -6 -30   6  187.19   36.99
   6 -30  -6  133.04   20.60
   6  30  -5   19.70    3.50
  -6 -30   5   22.31    6.60
   6 -30  -5    5.49    3.16
   6  30  -4   84.42   17.40
  -6 -30   4   74.95   17.62
   6 -30  -4   49.21   10.03
   6  30  -3   84.52   13.11
  -6 -30   3   93.86   21.69
   6 -30  -3   51.74    8.46
   6  30  -2  113.21   12.59
  -6 -30   2  115.95   23.29
   6  30  -1    3.09    2.14
  -6 -30   1   19.23    6.11
  -6 -30   0  116.96   20.22
  -6  30  -1  146.47   24.07
  -6 -30  -1  115.82   22.23
   6  30   2  107.30   12.79
  -6  30  -2  150.41   22.37
   6  30   3   17.24    5.40
  -6  30  -3   34.89    7.85
   6  30   4  168.55   24.22
  -6  30  -4  262.05   30.56
   6  30   5   40.66    8.47
  -6  30  -5   31.19   11.45
   6  30   6    7.50    4.42
  -6  30  -6   11.94    4.39
   6  32  -6   28.22    6.37
  -6 -32   6   38.06    9.53
   6 -32  -6    9.72    5.46
   6  32  -5  250.03   23.39
  -6 -32   5  269.13   23.77
   6 -32  -5   42.89   19.75
  -6 -32   4   13.90    5.85
   6 -32  -4    9.17    2.53
   6  32  -3   88.88   14.26
  -6 -32   3  118.99   19.40
   6 -32  -3   40.08    8.54
   6  32  -2    9.44    3.48
  -6 -32   2    0.77    3.96
  -6 -32   1 1965.35  431.89
  -6 -32   0   19.15    6.55
  -6  32  -1  176.88   33.00
  -6 -32  -1  139.02   34.08
   6  32   2   19.62    6.11
  -6  32  -2    9.30    3.74
   6  32   3  190.56   22.28
  -6  32  -3  280.63   25.92
   6  32   4    2.18    3.48
  -6  32  -4    6.93    3.54
   6  32   5  425.47   31.56
  -6  32  -5  615.81   47.19
   6  34  -5   13.91    4.89
  -6 -34   5    9.67    3.63
   6 -34  -5    7.58    6.04
   6  34  -4  335.92   23.66
  -6 -34   4  446.04   31.46
   6 -34  -4   92.94   31.40
   6  34  -3    4.89    3.22
   6 -34  -3   -1.98    3.04
  -6 -34   2    5.08    2.65
  -6 -34   1   38.74    7.91
  -6 -34   0   -1.56    3.28
   6  34   1   -0.72    3.27
  -6  34  -1    6.58    2.97
   6  34   2  255.37   22.95
  -6  34  -2  306.69   38.02
   6  34   3    2.24    3.05
  -6  34  -3    7.66    2.89
   6  34   4   16.27    5.54
  -6  34  -4    5.16    3.27
  -6 -36   3   23.58    6.99
   6 -36  -3   17.22    7.37
  -6 -36   2   81.09   23.18
  -6 -36   1    9.14    3.83
  -6 -36   0   18.50    7.09
   6  36   1   20.33    6.15
   6  36   2   46.27    9.40
  -6  36  -2   35.64   11.30
  -7   1  11    3.58    2.48
   7   1 -11    6.49    5.78
   7  -1 -11    0.94    2.21
  -7  -1  11    4.35    3.15
  -7   1  10    3.32    2.20
   7   1 -10    2.96    1.99
  -7  -1  10   14.51    5.84
   7  -1 -10    3.83    3.14
  -7   1   9  244.32   21.66
   7   1  -9  235.64   39.03
   7  -1  -9  227.51   19.97
  -7  -1   9  266.28   24.28
  -7   1   8   96.33   13.13
   7   1  -8   89.64   20.25
   7  -1  -8   88.92    9.83
  -7  -1   8   97.71   10.51
  -7   1   7   12.70    4.54
   7   1  -7    2.24    2.35
  -7  -1   7    6.19    3.03
   7  -1  -7    5.31    2.04
  -7   1   6 1959.59   57.32
   7   1  -6 1763.85   51.73
   7  -1  -6 1754.20   51.49
  -7  -1   6 2002.82   58.69
  -7   1   5  226.25   12.41
   7   1  -5  192.87   10.81
  -7  -1   5  219.86   12.56
   7  -1  -5  197.31   12.87
   7  -1  -5  208.99   11.26
  -7   1   4    3.50    2.77
   7   1  -4    1.76    1.46
  -7   1   4    3.73    1.79
   7   1  -4    2.34    2.05
  -7  -1   4    2.33    2.63
   7  -1  -4    2.98    1.98
   7  -1  -4    1.55    1.32
  -7  -1   4    1.41    1.64
  -7   1   3  645.58   12.71
   7   1  -3  568.43   11.53
   7   1  -3  667.95   12.99
  -7   1   3  436.41   10.06
   7  -1  -3  677.77   12.81
  -7  -1   3  619.78   12.69
   7  -1  -3  539.84   14.07
  -7  -1   3  445.87    9.34
   7   1  -2  688.50   13.80
   7   1  -2  567.51   11.65
  -7  -1   2  533.53   11.35
   7  -1  -2  696.79   13.49
   7  -1  -2  504.08   12.79
  -7   1   1   27.64    2.72
   7   1  -1   41.95    6.02
   7   1  -1   20.16    2.04
  -7  -1   1   32.93    5.18
   7  -1  -1   28.02    2.18
   7  -1  -1   46.32    6.61
   7  -1  -1   25.83    5.12
  -7   1   0 3806.95   67.47
   7   1   0 2505.56   45.15
   7   1   0 3554.38   62.90
   7   1   0 2282.23   41.12
  -7  -1   0 3558.79   63.32
   7  -1   0 2717.82   48.51
   7  -1   0 3475.26   61.64
   7  -1   0 2168.15   39.06
   7   1   1  190.19    9.56
   7   1   1  161.46    7.98
   7  -1   1  189.02    9.35
   7  -1   1  165.74    8.23
  -7   1  -2    3.20    1.34
   7   1   2    0.80    1.83
   7   1   2    5.62    1.09
   7   1   2    1.65    2.38
   7  -1   2    8.18    1.73
  -7  -1  -2    7.07    1.99
   7  -1   2    2.38    1.40
   7  -1   2    1.50    0.86
   7   1   3  808.03   20.49
   7   1   3  652.54   17.43
   7   1   3  766.75   19.42
  -7   1  -3  682.58   17.24
   7  -1   3  810.87   20.17
  -7  -1  -3  650.78   16.20
   7  -1   3  688.10   17.83
   7  -1   3  773.52   19.03
   7   1   4  965.35   24.64
  -7   1  -4  687.70   17.63
   7   1   4 1096.52   26.92
   7  -1   4  984.46   24.91
   7  -1   4 1244.50   30.95
   7  -1   4 1122.23   27.62
  -7  -1  -4  751.78   18.96
   7   1   5   11.74    2.44
  -7   1  -5    9.90    2.91
   7   1   5    8.47    2.36
   7  -1   5   17.92    3.99
  -7  -1  -5    8.15    2.27
   7  -1   5   12.22    2.97
   7   1   6 1022.84   39.13
  -7   1  -6  856.22   32.40
   7   1   6  994.94   37.38
   7  -1   6 1018.54   38.95
  -7  -1  -6  811.75   31.62
   7  -1   6  967.60   36.41
   7   1   7   60.47   12.67
  -7   1  -7   60.17   11.80
  -7  -1  -7   48.86    7.99
   7  -1   7   50.23   11.35
   7   1   8    1.46    1.57
  -7   1  -8    3.19    2.61
  -7  -1  -8    4.91    2.24
   7  -1   8    5.74    2.45
   7   1   9  209.66   27.10
  -7   1  -9  234.18   26.68
   7  -1   9  220.55   27.83
  -7  -1  -9  249.73   28.20
   7   1  10  286.25   24.91
  -7   1 -10  310.37   26.29
  -7  -1 -10  285.28   24.36
   7  -1  10  323.45   28.06
  -7   3  11   34.90    7.25
   7   3 -11   24.99    8.30
  -7  -3  11   34.58    8.51
   7  -3 -11   18.40    6.50
   7   3 -10   85.28   20.71
  -7   3  10  108.20   13.76
  -7  -3  10   94.18   22.85
   7  -3 -10   85.78   13.88
   7   3  -9   31.40    6.25
  -7   3   9   34.88    4.60
  -7  -3   9   61.55    6.90
   7  -3  -9   41.83   10.59
   7   3  -8  391.55   15.78
  -7   3   8  381.12   17.48
  -7  -3   8  394.67   15.57
   7  -3  -8  335.53   17.07
  -7   3   7  303.78   12.88
   7   3  -7  274.05   14.64
  -7  -3   7  326.77   14.38
   7  -3  -7  290.91   14.98
  -7   3   6  658.71   13.06
   7   3  -6  659.17   13.81
  -7  -3   6  700.63   15.20
   7  -3  -6  576.84   17.03
   7   3  -5    8.64    2.11
   7  -3  -5    1.89    2.30
  -7  -3   5    2.99    2.73
   7  -3  -5    3.32    2.74
  -7   3   4  367.67   10.56
   7   3  -4  386.32   10.88
   7   3  -4  334.96   12.83
  -7  -3   4  393.67   14.11
   7  -3  -4  389.62   10.66
   7  -3  -4  312.85    9.55
  -7  -3   4  287.98    8.31
  -7   3   3  103.15    6.00
   7   3  -3  119.93    6.26
   7   3  -3  103.46    7.35
  -7  -3   3  108.12    6.01
   7  -3  -3  112.95    6.67
   7  -3  -3   97.82    5.95
  -7  -3   3   87.65    4.81
   7   3  -2  825.91   15.47
   7   3  -2  710.11   13.26
  -7  -3   2  694.99   13.45
   7  -3  -2  867.56   17.01
   7  -3  -2  614.61   12.13
  -7  -3   2  597.83   11.71
  -7   3   1  860.35   16.27
   7   3  -1  829.16   15.96
   7   3  -1  729.05   14.12
   7  -3  -1  949.70   17.80
   7  -3  -1 1120.42   21.00
   7  -3  -1  639.89   12.92
   7   3   0 1468.43   26.56
  -7   3   0 1601.87   29.03
   7   3   0 1037.70   19.07
   7  -3   0 1211.52   22.20
  -7  -3   0 1318.67   25.39
   7  -3   0 1431.98   26.29
   7   3   1   58.21    4.56
   7   3   1   65.47    4.02
   7   3   1   57.95    3.01
   7  -3   1   74.71    4.27
  -7  -3  -1  101.76    5.30
   7  -3   1   57.01    3.51
   7  -3   1   59.43    4.17
  -7   3  -2  203.26    9.78
   7   3   2  200.63    9.52
   7   3   2  193.58    8.58
   7   3   2  155.91    8.06
   7  -3   2  167.30    9.09
   7  -3   2  170.67   12.37
   7  -3   2  163.68    7.84
  -7   3  -3  245.61   15.86
   7   3   3  324.65   23.21
   7   3   3  301.82   21.41
   7   3   3  267.91    8.49
   7  -3   3  311.51   18.46
  -7  -3  -3  328.74    8.72
   7  -3   3  268.31    8.52
   7  -3   3  300.21    8.26
   7   3   4  419.64   48.08
  -7   3  -4  284.04   15.11
   7   3   4  475.87   53.91
   7  -3   4  409.19   21.38
   7  -3   4  549.51   62.35
   7  -3   4  440.28   22.51
  -7  -3  -4  332.17   17.07
   7   3   5  288.30   21.74
  -7   3  -5  214.05   16.27
   7   3   5  278.47   20.46
   7  -3   5  297.08   22.24
  -7  -3  -5  195.72   14.73
   7  -3   5  306.21   22.63
   7   3   6  452.71   18.83
  -7   3  -6  376.56   16.21
   7   3   6  445.01   17.23
   7  -3   6  455.12   18.61
  -7  -3  -6  356.40   14.70
   7   3   7   10.25    3.94
  -7   3  -7    6.02    2.70
   7   3   7    3.83    2.14
   7  -3   7   17.77    5.15
  -7  -3  -7    6.00    1.97
   7   3   8   29.76    6.45
  -7   3  -8   30.05    4.17
   7  -3   8   33.20    8.64
  -7  -3  -8   18.32    5.87
   7   3   9   11.71    5.65
  -7   3  -9   -0.31    2.08
   7  -3   9   25.10    8.01
  -7  -3  -9   10.52    2.80
   7   3  10   61.41   24.42
  -7   3 -10  117.22   25.04
  -7  -3 -10   99.14   16.26
   7  -3  10   67.20   22.20
   7   5 -11   28.75    8.07
  -7   5  11    9.15    6.27
  -7  -5  11    8.48    5.99
   7  -5 -11   19.85    8.07
   7   5 -10  306.78   17.67
  -7   5  10  369.02   21.55
  -7  -5  10  366.27   25.12
   7  -5 -10  311.82   18.03
   7   5  -9  128.56   18.74
  -7   5   9  141.75   17.14
  -7  -5   9  134.84   21.68
   7  -5  -9  115.37   16.82
   7   5  -8  180.36   20.81
  -7   5   8  176.97   22.86
  -7  -5   8  219.59   21.75
   7  -5  -8  187.42   21.68
  -7   5   7  153.80   19.12
   7   5  -7  165.46   20.87
  -7  -5   7  171.25   17.27
   7  -5  -7  156.17   17.40
  -7   5   6    1.18    2.68
   7   5  -6    0.86    2.87
  -7  -5   6    9.45    3.48
   7  -5  -6    1.79    1.86
  -7   5   5  102.89    7.51
   7   5  -5   93.51    6.25
   7  -5  -5   97.09    7.25
  -7  -5   5  130.19   13.33
   7  -5  -5   95.06    8.35
  -7   5   4 1047.89   25.78
   7   5  -4 1036.26   27.13
   7  -5  -4 1076.89   26.20
  -7  -5   4 1080.77   27.92
   7  -5  -4  894.60   22.78
  -7  -5   4  766.44   19.27
   7   5  -3  393.24    8.51
  -7   5   3  399.76    8.59
   7   5  -3  428.99    9.14
   7  -5  -3  431.94   10.40
  -7  -5   3  426.92   12.22
  -7  -5   3  311.37    6.88
   7  -5  -3  298.84    7.37
   7   5  -2   42.65    5.39
  -7   5   2   34.02    2.64
   7   5  -2   48.16    3.56
   7  -5  -2   46.24    5.46
  -7  -5   2   39.21    6.30
  -7  -5   2   38.39    4.96
   7  -5  -2   42.45    5.95
  -7   5   1  195.62    9.53
   7   5  -1  169.31    8.38
   7   5  -1  162.68    8.67
   7  -5  -1  205.92    9.99
   7  -5  -1  229.81   11.33
  -7  -5   1  157.56    8.54
   7  -5  -1  120.79    6.98
   7   5   0   72.16    3.80
  -7   5   0  113.07    5.86
   7   5   0   73.44    9.14
   7   5   0   98.04    5.59
  -7  -5   0   77.16    5.38
   7  -5   0   94.44   10.73
   7  -5   0   90.09    4.66
  -7   5  -1  662.55   12.87
   7   5   1  459.85    9.33
   7   5   1  409.35    7.91
   7  -5   1  429.49    8.28
  -7  -5  -1  654.09   13.26
   7  -5   1  518.25   10.47
   7  -5   1  386.52    7.97
   7   5   2 1418.52   25.26
   7   5   2 1484.89   24.96
   7   5   2 1184.79   22.39
  -7   5  -2 1370.55   24.16
   7  -5   2 1113.24   19.84
   7  -5   2 1325.83   23.16
   7   5   3  591.76   15.40
   7   5   3  483.14   13.09
  -7   5  -3  395.15   12.16
   7   5   3  553.49   13.47
   7  -5   3  491.09   12.96
   7  -5   3  584.69   15.50
   7  -5   3  521.32   13.64
  -7  -5  -3  624.60   15.13
  -7   5  -4    9.80    3.56
   7   5   4    8.04    2.87
   7   5   4    1.15    1.32
   7  -5   4    3.85    2.15
  -7  -5  -4    2.65    1.43
   7  -5   4    1.11    1.47
   7  -5   4    2.07    1.17
   7   5   5   15.50    3.95
   7   5   5   20.71    6.23
  -7   5  -5   22.30    4.28
  -7  -5  -5   13.63    3.36
   7  -5   5   30.63    6.99
   7   5   6   27.15    8.08
  -7   5  -6   33.45    6.86
   7   5   6   24.00    5.34
   7  -5   6   45.26   10.05
  -7  -5  -6   23.67    5.60
   7   5   7  227.79   15.66
  -7   5  -7  216.68   17.50
   7   5   7  197.13   12.87
   7  -5   7  242.68   17.73
  -7  -5  -7  208.73   13.74
   7   5   8  617.63   26.14
  -7   5  -8  668.40   27.38
   7  -5   8  648.02   26.84
  -7  -5  -8  583.49   23.91
   7   5   9    7.95    3.79
  -7   5  -9    9.00    4.17
   7  -5   9   11.36    5.87
  -7  -5  -9    8.68    3.16
   7   5  10   11.96    3.58
  -7   5 -10    4.10    2.92
   7   7 -11   40.72   16.71
  -7   7  11   34.26   12.52
  -7  -7  11   58.69   11.42
   7  -7 -11   67.42   14.85
   7   7 -10  275.25   31.32
  -7   7  10  246.55   29.22
  -7  -7  10  277.39   32.45
   7  -7 -10  228.88   30.16
   7   7  -9   38.76    7.38
  -7   7   9   20.21    6.03
  -7  -7   9   21.42    7.97
   7  -7  -9   27.05    6.23
   7   7  -8  303.87   20.26
  -7   7   8  290.77   19.39
  -7  -7   8  360.14   24.47
   7  -7  -8  268.54   20.00
   7   7  -7  540.30   21.85
  -7   7   7  521.18   21.01
  -7  -7   7  546.63   22.13
   7  -7  -7  439.53   20.90
   7   7  -6  255.38   19.40
  -7   7   6  237.74   18.13
  -7  -7   6  243.81   19.05
   7  -7  -6  234.78   22.65
  -7   7   5   54.77    7.97
   7   7  -5   52.66    8.05
   7  -7  -5   45.45    6.86
  -7  -7   5   69.42   10.51
   7  -7  -5   44.75    8.06
  -7   7   4  998.83   24.83
   7   7  -4 1023.19   25.81
   7  -7  -4  943.14   23.62
  -7  -7   4 1071.03   27.70
  -7  -7   4  806.28   20.46
   7  -7  -4  826.49   21.53
   7   7  -3   57.85    6.40
  -7   7   3   44.64    6.28
   7   7  -3   55.49    7.59
   7  -7  -3   54.66    6.47
  -7  -7   3   61.63   10.96
   7  -7  -3   32.24    3.70
  -7  -7   3   40.60    5.42
   7   7  -2 1152.59   20.94
  -7   7   2 1056.26   18.42
   7   7  -2 1178.04   20.76
  -7  -7   2 1072.63   20.12
   7  -7  -2 1551.83   27.52
   7  -7  -2 1304.86   22.52
   7  -7  -2  770.71   15.73
  -7  -7   2  894.92   15.95
  -7   7   1 1199.55   20.51
   7   7  -1  984.23   17.25
   7   7  -1  881.09   16.31
   7  -7  -1 1140.57   19.57
   7  -7  -1 1286.16   22.88
  -7  -7   1  920.56   17.55
  -7  -7   1  699.99   12.50
   7   7   0  749.54   13.16
   7   7   0  520.21   10.44
   7   7   0  591.66   10.56
   7  -7   0  674.65   12.07
  -7  -7   0  625.08   13.27
   7  -7   0  660.35   12.78
  -7   7  -1  100.85    5.84
   7   7   1   75.09    4.56
   7   7   1   82.00    4.00
   7   7   1   78.74    3.90
   7  -7   1   78.02    5.20
  -7  -7  -1   96.61    7.27
   7  -7   1   73.44    7.95
   7  -7   1   96.56    4.97
   7   7   2 1546.12   37.29
   7   7   2 1869.71   43.68
   7   7   2 1380.05   34.28
  -7   7  -2 1501.91   36.33
   7   7   2 1271.48   29.81
   7  -7   2 1548.87   37.00
   7  -7   2 1219.79   29.80
   7   7   3  139.96    8.55
   7   7   3  151.29    7.74
  -7   7  -3  124.38   10.42
   7  -7   3  173.50   11.30
   7  -7   3  136.27    9.52
   7  -7   3  145.00    8.68
   7   7   4  175.33   12.41
  -7   7  -4  165.04   11.74
   7   7   4  196.94   12.82
   7  -7   4  203.23   13.67
  -7  -7  -4  210.51   13.54
   7  -7   4  179.70   12.00
   7   7   5  591.93   10.14
   7   7   5  630.57   13.40
  -7   7  -5  489.97   11.55
  -7  -7  -5  465.56    8.34
   7  -7   5  625.30   13.12
   7   7   6  282.35   23.23
  -7   7  -6  245.98   19.92
   7   7   6  251.96   19.77
   7  -7   6  267.76   22.94
  -7  -7  -6  216.97   17.19
   7   7   7  111.53    7.59
   7   7   7  123.80   21.54
  -7   7  -7  145.08   10.71
  -7  -7  -7  119.96    8.83
   7  -7   7  169.52   17.72
   7   7   8  633.17   26.68
  -7   7  -8  660.96   27.60
   7  -7   8  625.04   27.17
  -7  -7  -8  520.20   21.06
   7   7   9   34.04    9.40
  -7   7  -9   30.12    9.29
   7  -7   9   29.60    6.41
  -7  -7  -9    7.75    2.68
  -7   7 -10   83.49   23.66
   7   7  10   76.83   24.18
   7  -7  10  114.90   20.43
   7   9 -11   12.82    4.65
  -7   9  11    4.90    3.64
  -7  -9  11    1.57    6.07
   7  -9 -11   11.58    3.92
   7   9 -10  488.32   32.24
  -7   9  10  454.33   29.64
  -7  -9  10  492.83   33.46
   7  -9 -10  414.34   32.36
   7   9  -9   51.12   13.40
  -7   9   9   35.68    9.75
  -7  -9   9   64.31   10.01
   7  -9  -9   51.00   10.05
   7   9  -8  236.64   16.36
  -7   9   8  231.49   15.77
  -7  -9   8  278.12   27.85
   7  -9  -8  205.89   19.83
   7   9  -7   35.77    7.93
  -7   9   7   36.55    7.11
  -7  -9   7   39.78    7.97
   7  -9  -7   26.67    6.88
  -7   9   6  161.99   12.53
   7   9  -6  206.77   20.66
  -7  -9   6  199.74   17.00
   7  -9  -6  155.42   11.86
   7  -9  -6  151.49   13.52
  -7   9   5  131.02    9.89
   7   9  -5  105.86   11.24
  -7  -9   5  146.85   13.65
   7  -9  -5   83.52    9.40
   7  -9  -5  107.56   10.39
  -7   9   4 2455.99  277.39
   7   9  -4 2591.10   63.14
   7  -9  -4 2480.17   59.68
  -7  -9   4 2751.49  310.91
  -7  -9   4 2087.71  235.88
   7  -9  -4 2077.06  234.81
  -7   9   3  218.77   13.13
   7   9  -3  255.87   18.44
  -7  -9   3  245.46   16.29
   7  -9  -3  235.32   13.90
  -7  -9   3  200.23   13.98
   7  -9  -3  164.41   10.55
  -7   9   2  488.67   12.22
   7   9  -2  543.89   13.99
   7   9  -2  509.00   13.57
   7  -9  -2  585.67   14.26
   7  -9  -2  679.48   17.56
  -7  -9   2  513.18   16.66
  -7  -9   2  398.99   11.42
   7  -9  -2  393.68   11.33
  -7   9   1    1.90    0.64
   7   9  -1    2.04    1.41
   7   9  -1    4.36    1.56
   7  -9  -1   -0.88    0.77
   7  -9  -1    2.32    1.70
  -7  -9   1    2.47    2.41
  -7  -9   1    0.39    0.55
   7   9   0   71.26    7.52
   7   9   0   67.92    3.29
  -7  -9   0   73.82    5.71
   7  -9   0   85.35    5.59
   7  -9   0   79.52    9.05
   7  -9   0   63.74    3.33
  -7   9  -1  923.89   23.08
   7   9   1  712.15   18.24
   7   9   1  865.93   20.28
   7   9   1  934.64   21.88
   7  -9   1  723.63   17.43
  -7  -9  -1  912.71   23.18
   7  -9   1  739.13   18.66
   7  -9   1  911.78   21.86
   7   9   2 2297.76   55.26
  -7   9  -2 2315.19   55.26
   7  -9   2 2236.12   53.28
   7   9   3  342.52   18.29
  -7   9  -3  340.65   19.04
   7  -9   3  425.27   21.68
   7  -9   3  378.82   19.43
   7  -9   3  348.65   18.11
  -7   9  -4  292.93   19.51
   7   9   4  311.90   20.98
  -7   9  -4  253.20   16.56
   7   9   4  274.18   17.41
   7  -9   4  346.69   52.53
  -7  -9  -4  390.40   24.71
  -7   9  -5   72.41   12.39
   7   9   5  119.40   14.20
  -7   9  -5  103.23   12.64
   7   9   5  102.71    9.62
   7  -9   5  122.00   15.87
  -7  -9  -5  104.02    9.74
   7   9   6   28.37    5.85
   7   9   6   44.89    8.26
  -7   9  -6   44.13    9.36
  -7  -9  -6   27.59    7.61
   7  -9   6   50.44    8.66
   7   9   7   97.14   15.76
  -7   9  -7  101.01   11.50
   7  -9   7  109.37   13.78
  -7  -9  -7   79.72    7.42
   7   9   8  933.66   38.11
  -7   9  -8  961.08   39.02
   7  -9   8 1012.50   40.72
  -7  -9  -8  771.04   31.26
  -7   9  -9  172.15   27.44
   7   9   9  135.95   25.82
   7  -9   9  169.46   26.39
  -7   9 -10   32.65    8.99
   7   9  10   13.76    6.17
   7  -9  10   37.96   10.93
   7  11 -11   27.35   10.35
  -7  11  11   13.79    8.11
  -7 -11  11   20.04    7.30
   7 -11 -11   19.36    7.15
   7  11 -10  118.79   23.16
  -7  11  10   59.94   22.03
  -7 -11  10  109.55   18.20
   7 -11 -10   77.57   23.16
   7  11  -9   14.71    6.23
  -7  11   9    0.38    2.98
  -7 -11   9   10.60    7.38
   7 -11  -9   -1.15    1.94
   7  11  -8    8.45    3.74
  -7  11   8    8.47    3.94
  -7 -11   8    3.32    4.14
   7 -11  -8   -0.74    3.35
   7  11  -7  389.23   15.27
  -7  11   7  354.44   14.01
  -7 -11   7  392.17   16.28
   7 -11  -7  299.38   12.89
  -7  11   6  448.96   19.05
   7  11  -6  488.13   19.73
  -7 -11   6  511.29   21.39
   7 -11  -6  380.42   15.81
   7 -11  -6  379.80   15.98
  -7  11   5  196.27   16.01
   7  11  -5  232.88   22.90
  -7 -11   5  214.91   18.36
   7 -11  -5  171.77   15.90
   7 -11  -5  165.40   14.25
  -7  11   4   21.10    4.12
   7  11  -4   28.08    4.89
   7 -11  -4   14.96    3.68
  -7 -11   4   20.10    4.37
  -7 -11   4   17.64    3.88
   7 -11  -4   13.97    4.08
  -7  11   3    4.31    1.59
   7  11  -3    7.39    2.04
  -7 -11   3    6.53    3.71
   7 -11  -3    6.53    1.72
  -7 -11   3    8.47    1.52
   7 -11  -3    4.85    2.41
  -7  11   2    7.07    1.48
   7  11  -2   10.02    1.91
   7 -11  -2    4.84    1.30
  -7 -11   2   10.31    4.55
  -7 -11   2    2.50    0.84
   7 -11  -2    7.83    2.36
   7  11  -1 2156.60   50.73
   7 -11  -1 1851.42   43.31
  -7 -11   1 1912.70   46.27
  -7 -11   1 1308.93   31.04
   7  11   0  477.48   11.55
   7 -11   0  470.54   11.27
   7 -11   0  459.28   11.10
   7 -11   0  395.24   10.93
  -7 -11   0  420.86   12.10
  -7  11  -1    9.15    2.15
  -7 -11  -1   18.44    3.58
   7 -11   1   16.88    1.73
   7 -11   1   16.38    2.07
   7 -11   1   18.34    3.22
  -7  11  -2   78.44    9.50
   7 -11   2   94.32    5.34
   7 -11   2   63.25    6.68
   7  11   3   33.21    5.75
  -7  11  -3   35.60    7.53
   7 -11   3   32.03    6.42
   7 -11   3   43.06    6.61
  -7  11  -4   17.11    3.35
   7  11   4   28.18    6.62
  -7  11  -4   26.33    4.90
   7 -11   4   23.16    4.81
   7  11   5 1156.69   42.60
   7  11   5 1610.12   60.70
  -7  11  -5 1401.04   52.85
  -7 -11  -5 1729.96   63.55
   7 -11   5 1726.61   64.29
   7  11   6  463.06   16.19
   7  11   6  605.53   23.46
  -7  11  -6  539.76   20.35
  -7 -11  -6  565.26   19.59
   7 -11   6  679.27   24.96
   7  11   7   61.15   14.36
  -7  11  -7   66.75    4.64
   7 -11   7   73.60    7.55
  -7 -11  -7   40.80    6.29
  -7  11  -8   55.14    8.38
   7  11   8   43.61    9.89
   7 -11   8   48.08    7.62
  -7  11  -9    6.69    3.67
   7  11   9   11.24    4.38
   7 -11   9    2.95    1.86
   7  11  10    9.90    4.04
   7 -11  10   23.26    5.43
   7  13 -11    1.89    4.28
  -7  13  11   -2.97    3.98
  -7 -13  11   14.18    6.06
   7 -13 -11   -2.12    3.69
   7  13 -10  144.04   29.43
  -7  13  10  146.81   22.42
  -7 -13  10  115.58   31.21
   7 -13 -10  117.89   22.59
   7  13  -9  300.16   15.96
  -7  13   9  228.38   23.99
  -7 -13   9  279.97    9.62
   7 -13  -9  238.28   14.54
   7  13  -8  296.64   26.28
  -7  13   8  242.61   21.18
  -7 -13   8  296.99   17.48
   7 -13  -8  194.34   22.15
   7  13  -7  252.41   24.68
  -7  13   7  198.26   20.17
  -7 -13   7  264.45   26.06
   7 -13  -7  173.90   18.92
  -7  13   6   48.87    9.99
   7  13  -6   42.16    7.94
  -7 -13   6   73.48   13.45
   7 -13  -6   22.00    6.07
   7 -13  -6   37.97    7.04
  -7  13   5    2.93    2.12
   7  13  -5    7.17    2.57
  -7 -13   5    7.70    3.14
   7 -13  -5    2.97    1.50
   7 -13  -5    6.52    2.72
  -7  13   4  711.35   21.07
   7  13  -4  900.78   27.00
  -7 -13   4  925.00   28.39
   7 -13  -4  815.77   23.98
   7 -13  -4  568.94   18.20
  -7 -13   4  648.48   19.68
  -7  13   3  461.57   11.61
   7  13  -3  502.37   13.40
  -7 -13   3  453.60   13.38
   7 -13  -3  503.13   12.65
  -7 -13   3  371.50   42.24
   7 -13  -3  354.37   11.80
   7  13  -2  157.95    9.12
  -7  13   2  146.39    7.59
  -7 -13   2  151.25    9.22
  -7 -13   2   98.74    6.86
   7 -13  -2  100.26    6.73
   7  13  -1    3.00    0.99
  -7 -13   1    4.18    3.70
  -7 -13   1    3.68    1.54
   7  13   0  688.27   16.61
  -7 -13   0  604.57   16.45
  -7  13  -1   85.57   10.22
  -7 -13  -1   79.65   12.34
   7 -13   1   94.00    5.82
   7 -13   1   90.32    4.73
  -7  13  -2 1229.45   31.06
  -7 -13  -2 1429.21   35.95
  -7  13  -3  718.39   22.34
   7  13   3  631.80   20.03
   7 -13   3  711.99   21.09
  -7  13  -4   63.02   11.16
   7  13   4  125.02   16.30
  -7  13  -4  119.54   18.07
   7 -13   4  116.48   12.52
  -7  13  -5   94.96   14.91
   7  13   5  141.92   13.37
  -7  13  -5  126.59   11.40
   7 -13   5  149.08   16.48
   7  13   6   25.60    5.77
  -7  13  -6   38.53    7.72
   7 -13   6   44.07    5.72
  -7 -13  -6   15.55    3.13
  -7  13  -7  183.46   16.39
   7  13   7  188.57   22.42
   7 -13   7  208.48   18.20
  -7  13  -8  296.28   15.61
   7  13   8  303.96   20.56
   7 -13   8  320.16   17.41
  -7  13  -9   39.53    7.85
   7  13   9   26.47    6.73
   7 -13   9   29.26    7.08
  -7  13 -10   24.31    7.43
   7  13  10   31.89   10.34
   7 -13  10   17.14    6.32
   7  15 -10   49.01   15.56
  -7 -15  10   52.71   11.02
   7 -15 -10   32.89   11.45
   7  15  -9   70.64   16.48
  -7  15   9   67.89    9.19
  -7 -15   9   46.33   13.74
   7 -15  -9   62.91   15.68
   7  15  -8  228.94   23.69
  -7  15   8  187.86   18.62
  -7 -15   8  221.75   22.07
   7 -15  -8  149.35   27.96
   7  15  -7   58.81    7.14
  -7  15   7   38.14    7.78
  -7 -15   7   60.88   13.61
   7 -15  -7   36.34    6.52
  -7  15   6  760.57   27.21
   7  15  -6  974.10   34.82
  -7 -15   6  950.81   34.48
   7 -15  -6  789.75   27.75
   7 -15  -6  659.81   24.49
  -7  15   5    9.57    2.22
   7  15  -5   10.16    2.70
  -7 -15   5   18.30    4.43
   7 -15  -5    8.63    2.74
   7 -15  -5    6.05    2.14
  -7  15   4    4.14    1.38
   7  15  -4    3.78    1.94
  -7 -15   4    4.87    3.31
   7 -15  -4    1.76    1.30
  -7 -15   4    6.58    2.81
   7 -15  -4    1.88    2.71
  -7  15   3   10.42    2.29
   7  15  -3   16.49    2.78
  -7 -15   3    9.20    2.77
   7 -15  -3    7.02    1.29
  -7 -15   3    6.13    1.55
   7 -15  -3    3.91    2.66
   7  15  -2 1249.04   36.50
  -7 -15   2 1116.43   33.54
  -7 -15   2  906.71   26.48
   7  15  -1   18.24    2.48
  -7 -15   1   19.99    3.63
  -7 -15   1    6.80    1.52
   7  15   0 1807.29   42.95
  -7 -15   0 1785.11   45.54
  -7 -15   0 1139.32   27.18
  -7  15  -1  132.75   13.00
  -7 -15  -1  137.94   10.96
  -7  15  -2   40.25    7.01
  -7 -15  -2   38.72    7.21
   7 -15   2   33.22    5.12
   7 -15   2   22.92    4.13
   7  15   3   87.41    8.32
  -7  15  -3  141.62   20.09
   7 -15   3   98.65   15.05
   7 -15   3  118.21   11.06
  -7  15  -4  882.03   32.97
   7  15   4  988.40   37.93
  -7  15  -4 1242.94   47.12
   7 -15   4 1325.58   49.57
  -7  15  -5   21.79    4.38
   7  15   5   38.20    7.20
  -7  15  -5   43.38    7.75
   7 -15   5   48.28    8.05
  -7  15  -6  619.74   31.58
   7  15   6  563.80   28.80
   7 -15   6  723.17   35.99
  -7  15  -7   16.45    5.48
   7  15   7   11.95    5.24
   7 -15   7    8.91    3.17
  -7  15  -8    5.64    3.20
   7  15   8    9.51    4.25
   7 -15   8    4.46    3.14
  -7  15  -9   46.00    9.07
   7  15   9   51.18   12.72
   7 -15   9   25.97   13.74
   7  17 -10    6.92    3.16
  -7  17  10    3.90    3.25
  -7 -17  10    8.00    3.13
   7 -17 -10    3.46    4.03
   7  17  -9  615.35   39.76
  -7  17   9  443.06   29.36
  -7 -17   9  663.78   43.08
   7 -17  -9  472.03   32.64
   7  17  -8    2.48    3.48
  -7  17   8    2.75    2.24
  -7 -17   8   -3.87    4.25
   7 -17  -8    0.89    3.40
   7  17  -7    8.25    4.26
  -7  17   7    0.00    1.83
  -7 -17   7    7.65    5.28
   7 -17  -7    3.55    2.54
  -7  17   6   17.09    4.89
   7  17  -6   39.73    7.61
  -7 -17   6   44.09    9.93
   7 -17  -6   20.26    5.01
   7 -17  -6   24.24    4.34
  -7  17   5  214.79   18.07
   7  17  -5  302.27   24.19
  -7 -17   5  296.18   24.65
   7 -17  -5  215.47   17.08
   7 -17  -5  185.14   21.52
  -7  17   4   13.80    2.89
   7  17  -4   19.81    4.02
  -7 -17   4   13.12    3.28
   7 -17  -4    5.77    1.78
  -7 -17   4    7.70    1.90
   7 -17  -4    6.32    2.74
   7  17  -3 2740.35   43.31
  -7  17   3 2361.28   36.00
  -7 -17   3 2346.52   38.91
   7 -17  -3 1653.66   28.41
   7  17  -2   98.69    8.82
  -7 -17   2  103.72   12.54
  -7 -17   2   63.32    6.49
   7  17  -1   16.19    2.69
  -7 -17   1    8.13    3.47
  -7 -17   1    4.54    1.44
   7  17   0  126.14    8.43
  -7 -17   0  185.11   13.77
  -7 -17   0  103.41    6.91
  -7  17  -1  675.73   21.47
  -7 -17  -1  821.29   25.84
  -7  17  -2   80.50   10.83
  -7 -17  -2   69.96   13.18
   7 -17   2   78.86    9.41
   7 -17   2   59.14    9.13
   7  17   3  505.72   20.57
  -7  17  -3  827.31   32.12
   7 -17   3  719.20   26.88
   7 -17   3  877.64   32.66
  -7  17  -4    5.69    1.78
   7  17   4   11.81    4.87
  -7  17  -4   12.04    4.32
   7 -17   4    5.04    2.32
   7  17   5   23.23    6.73
  -7  17  -5   10.10    3.46
  -7  17  -5   28.89    5.99
   7 -17   5   21.17    5.77
  -7  17  -6   43.17    5.21
   7  17   6   36.26    6.76
   7 -17   6   58.07    7.23
  -7  17  -7  338.54   17.88
   7  17   7  342.90   18.84
   7 -17   7  395.20   20.63
  -7  17  -8   17.31    6.47
   7  17   8    5.82    2.83
   7 -17   8    3.18    2.03
  -7  17  -9  195.24   16.20
   7  17   9  183.01   19.83
   7 -17   9  201.51   19.51
   7  19 -10   14.47    5.87
  -7  19  10    0.21    1.98
  -7 -19  10    6.27    2.86
   7 -19 -10    2.48    3.19
   7  19  -9   10.91    7.02
  -7  19   9   -2.47    2.36
  -7 -19   9    3.80    3.27
   7 -19  -9   -0.19    4.19
   7  19  -8  116.57   14.95
  -7  19   8   43.49   11.19
  -7 -19   8   78.86   25.33
   7 -19  -8   64.48    8.92
   7  19  -7  228.93   22.26
  -7  19   7  144.29   17.19
  -7 -19   7  244.47   31.55
   7 -19  -7  140.01   19.31
   7  19  -6  652.54   33.59
  -7  19   6  461.68   22.94
  -7 -19   6  629.61   31.97
   7 -19  -6  431.11   23.21
  -7  19   5   96.18   11.93
   7  19  -5  120.10   12.26
  -7 -19   5  141.00   21.27
   7 -19  -5   56.77   10.24
   7 -19  -5   79.11    9.27
  -7  19   4    2.53    1.71
   7  19  -4    5.51    2.68
  -7 -19   4    2.58    4.41
   7 -19  -4    2.04    1.15
   7 -19  -4   10.73    5.09
   7  19  -3  410.33   16.26
  -7 -19   3  326.17   14.23
  -7 -19   3  268.59   13.23
   7 -19  -3  209.80   10.17
   7  19  -2  541.61   10.07
  -7 -19   2  490.29   11.89
  -7 -19   2  366.06    7.35
   7  19  -1  616.99   10.63
  -7 -19   1  615.70   13.14
  -7 -19   1  423.85    7.62
   7  19   0  961.77   15.05
  -7 -19   0 1124.75   25.65
  -7 -19   0  691.94   11.02
  -7  19  -1  125.17   15.07
  -7 -19  -1  129.20   14.20
  -7  19  -2    5.87    2.76
  -7 -19  -2    3.56    2.93
   7  19   3    0.56    2.84
  -7  19  -3    8.16    3.26
   7 -19   3   -0.10    0.79
   7 -19   3    1.82    1.29
  -7  19  -4   98.59   10.65
   7  19   4  131.04   19.01
  -7  19  -4  187.66   22.06
   7 -19   4  174.37   18.14
  -7  19  -5  546.68   28.17
   7  19   5  370.21   20.15
   7 -19   5  550.72   27.41
  -7  19  -6  115.81   12.94
   7  19   6   77.07   14.14
   7 -19   6  104.19   16.99
  -7  19  -7   16.50    6.10
   7  19   7    7.45    3.41
   7 -19   7    0.92    1.55
  -7  19  -8    4.31    3.34
   7  19   8    9.86    5.54
   7 -19   8    4.92    2.77
  -7  19  -9    2.67    4.20
   7  19   9    4.86    4.85
   7 -19   9    2.35    2.58
   7  21  -9  113.73   25.47
  -7  21   9   90.04   15.96
  -7 -21   9   68.52   24.54
   7 -21  -9   64.90   23.65
   7  21  -8  234.65   20.39
  -7  21   8  157.24   24.26
  -7 -21   8  182.73   43.28
   7 -21  -8  111.49   29.63
   7  21  -7  149.50   23.08
  -7  21   7   93.82   12.92
  -7 -21   7  137.21   18.18
   7 -21  -7   74.47   18.85
   7  21  -6  214.42   18.79
  -7  21   6  151.76   13.70
  -7 -21   6  190.66   21.58
   7 -21  -6  113.12   21.05
   7  21  -5   14.74    3.66
  -7  21   5    8.86    2.93
  -7 -21   5   20.89    4.76
   7 -21  -5    9.89    4.56
   7  21  -4  827.53   29.79
  -7  21   4  619.08   21.30
  -7 -21   4  718.09   26.63
   7 -21  -4  439.40   25.15
   7  21  -3    2.66    1.48
  -7 -21   3   12.84    6.19
  -7 -21   3    7.26    1.97
   7 -21  -3    2.04    2.98
   7  21  -2   60.10   12.99
  -7 -21   2   72.27   14.67
  -7 -21   2   28.79    7.35
   7  21  -1  614.73   23.11
  -7 -21   1  707.39   28.10
  -7 -21   1  470.39   17.80
   7  21   0  142.13   13.63
  -7 -21   0  211.99   28.87
  -7 -21   0   94.28    9.33
  -7  21  -1    6.54    3.16
  -7 -21  -1    5.50    2.57
  -7  21  -2 1058.48   41.10
  -7 -21  -2 1044.56   40.47
   7  21   3  154.94   16.18
  -7  21  -3  218.86   31.83
   7 -21   3  217.54   20.57
   7 -21   3  229.40   21.70
  -7  21  -4   44.37   10.68
   7  21   4   27.54    4.95
   7 -21   4   40.79    6.31
  -7  21  -5  393.35   27.52
   7  21   5  259.61   24.01
   7 -21   5  449.14   18.76
  -7  21  -6   78.73   11.76
   7  21   6   33.55    8.80
   7 -21   6   36.12   11.75
  -7  21  -7    6.15    4.17
   7  21   7   13.30    5.55
   7 -21   7    5.53    3.32
  -7  21  -8  199.85   16.16
   7  21   8  129.96   26.94
   7 -21   8  223.18   17.96
   7  23  -9    6.79    3.62
  -7 -23   9    9.62    3.50
   7 -23  -9    3.15    3.81
   7  23  -8    5.43    3.09
   7 -23  -8   13.45    5.41
   7  23  -7  511.96   27.74
  -7 -23   7  482.82   27.76
   7 -23  -7  315.87   25.46
   7  23  -6  226.22   22.39
  -7 -23   6  180.07   21.86
   7 -23  -6  109.31   21.02
   7  23  -5  317.09   16.20
  -7 -23   5  281.15   25.23
   7 -23  -5  164.76   17.53
   7  23  -4   10.36    2.67
  -7 -23   4   -4.98    3.33
   7 -23  -4    0.75    2.91
   7  23  -3   25.24    7.46
  -7 -23   3   18.87    5.52
  -7 -23   3    7.26    2.99
   7 -23  -3   10.11    4.90
   7  23  -2  286.10   27.74
  -7 -23   2  314.37   60.97
  -7 -23   2  182.88   17.81
   7  23  -1  745.53   28.07
  -7 -23   1 1013.22   39.30
  -7 -23   1  661.92   24.88
   7  23   0  579.47   21.64
  -7 -23   0  670.17   26.80
  -7 -23   0  404.80   15.22
  -7  23  -1  110.60   18.68
  -7 -23  -1  107.29   14.94
   7  23   2   53.63    7.76
  -7  23  -2   77.09   12.39
  -7  23  -3   12.08    4.19
   7  23   3   -0.41    3.40
   7 -23   3    0.72    0.55
  -7  23  -4  312.87   25.03
   7  23   4  154.31   23.56
   7 -23   4  298.66   12.47
  -7  23  -5  414.92   24.56
   7  23   5  266.15   14.88
   7 -23   5  429.26   20.21
   7  23   6   69.55   16.97
  -7  23  -6  124.44   24.19
   7  23   7   14.98    5.72
  -7  23  -7   22.14    5.86
   7  23   8    2.91    2.28
  -7  23  -8    3.91    4.40
   7  25  -8   50.25   10.30
  -7 -25   8   25.02   10.85
   7 -25  -8   22.45    8.16
   7  25  -7   28.37   12.10
  -7 -25   7   40.96    8.63
   7 -25  -7   15.03    8.13
   7  25  -6   10.43    3.27
  -7 -25   6    6.01    3.67
   7 -25  -6   18.86    5.75
   7  25  -5   64.25   12.09
  -7 -25   5   66.67    8.41
   7 -25  -5   51.25    7.17
   7  25  -4  551.84   23.22
  -7 -25   4  478.07   21.21
   7 -25  -4  232.58   29.22
   7  25  -3  269.72   12.01
  -7 -25   3  249.24   23.97
   7 -25  -3  110.13   14.78
   7  25  -2  111.99   14.68
  -7 -25   2  137.07   18.63
   7  25  -1  637.74   31.03
  -7 -25   1  810.40   40.63
   7  25   0    3.42    1.01
  -7 -25   0   12.05    3.59
  -7  25  -1   84.47   11.08
  -7 -25  -1   73.29    9.67
   7  25   2  588.40   35.60
  -7  25  -2  853.09   47.43
   7  25   3  157.01   15.06
  -7  25  -3  222.52   25.57
   7  25   4    5.85    2.17
  -7  25  -4    3.98    3.82
   7  25   5  110.87   13.93
  -7  25  -5  253.01   30.13
   7  25   6   -0.46    3.76
  -7  25  -6    8.46    4.94
   7  25   7   20.88    5.59
  -7  25  -7   32.85    6.68
   7  27  -8  125.15   11.78
  -7 -27   8  126.15   11.56
   7 -27  -8   66.81    9.83
   7  27  -7  138.60   25.60
  -7 -27   7   78.34   29.16
   7 -27  -7   64.31   18.07
   7  27  -6   59.61   20.51
  -7 -27   6   85.22   28.01
   7 -27  -6   43.42   14.10
   7  27  -5   -1.43    2.70
  -7 -27   5    4.29    2.10
   7 -27  -5    4.72    2.18
   7  27  -4  255.92    6.73
  -7 -27   4  213.77   29.31
   7 -27  -4   98.66   17.53
   7  27  -3    6.79    2.75
  -7 -27   3    7.60    4.31
   7 -27  -3    6.49    3.18
   7  27  -2   43.68    9.14
  -7 -27   2   79.34    9.58
   7  27  -1  284.66   46.63
  -7 -27   1  295.42   31.30
  -7 -27   0  231.39   28.44
  -7  27  -1    9.41    3.62
  -7 -27  -1   16.23    4.55
   7  27   2  165.57   24.84
  -7  27  -2  287.01   30.84
   7  27   3   -0.04    2.42
  -7  27  -3    7.88    2.68
   7  27   4   93.92   12.26
  -7  27  -4  103.89   19.31
   7  27   5  224.70   19.61
  -7  27  -5  404.67   29.91
   7  27   6   38.72   14.74
  -7  27  -6   51.27   21.88
   7  27   7   13.52    6.41
  -7  27  -7   19.50    5.78
   7  29  -7   56.42   13.17
  -7 -29   7   39.13   14.42
   7 -29  -7   43.90    6.95
   7  29  -6   53.89   20.04
  -7 -29   6  113.22   18.03
   7 -29  -6   64.00   11.45
   7  29  -5   52.97   17.11
  -7 -29   5   91.52   15.12
   7 -29  -5   22.19    8.88
   7  29  -4  408.04   22.02
  -7 -29   4  411.05   22.95
   7 -29  -4  133.36   27.39
   7  29  -3  176.87   18.61
  -7 -29   3  175.20   36.75
   7 -29  -3   98.78   14.81
   7  29  -2   43.83    3.71
  -7 -29   2   50.75    9.32
  -7 -29   1  211.65   29.89
  -7 -29   0    5.94    3.20
  -7  29  -1  128.03   22.12
  -7 -29  -1  114.84   23.09
   7  29   2  602.52   34.95
  -7  29  -2  810.51   38.74
   7  29   3  140.02   25.31
  -7  29  -3  233.45   30.50
   7  29   4   -1.40    2.81
  -7  29  -4   17.56    6.81
   7  29   5   11.93    4.31
  -7  29  -5   31.19    8.56
   7  29   6    5.49    2.08
  -7  29  -6    3.74    4.57
   7  31  -6  113.92   17.48
  -7 -31   6  134.28   10.97
   7 -31  -6   46.27    9.96
   7  31  -5  114.43   25.79
  -7 -31   5  166.93   25.77
   7 -31  -5   37.90   15.85
   7  31  -4    8.44    3.40
  -7 -31   4    4.07    3.24
   7 -31  -4    8.50    3.94
   7  31  -3  459.06   29.54
  -7 -31   3  701.21   45.42
   7 -31  -3  274.55   25.35
  -7 -31   2   71.28   19.29
  -7 -31   1    6.58    4.24
  -7 -31   0  436.74   24.43
  -7  31  -1  519.63   28.91
  -7 -31  -1  495.38   30.65
   7  31   2   17.65    6.18
  -7  31  -2   29.46    7.49
   7  31   3  292.87   20.28
  -7  31  -3  408.47   38.62
   7  31   4  131.08   23.26
  -7  31  -4  144.02   36.37
   7  31   5    2.50    2.06
  -7  31  -5   -5.47    4.13
   7  33  -5   44.93   10.66
  -7 -33   5   31.45    7.82
   7 -33  -5   28.56    6.55
  -7 -33   4   10.40    3.86
   7 -33  -4    3.90    3.48
  -7 -33   3  271.43   17.25
   7 -33  -3   92.34   23.56
  -7 -33   2   69.20   17.44
  -7 -33   1    6.01    2.93
  -7 -33   0   84.23   21.53
  -7  33  -1  101.67   30.11
  -7 -33  -1  158.13   29.30
   7  33   2    4.57    4.12
  -7  33  -2    8.79    3.72
   7  33   3   95.49   20.15
  -7  33  -3  150.13   35.59
   7  33   4   39.15   14.34
  -7  33  -4   79.96   13.45
  -7 -35   3  143.02   33.30
   7 -35  -3   62.95   19.22
  -7 -35   2   35.51    9.21
  -7 -35   1    4.05    3.15
  -7 -35   0   29.05    7.63
   7  35   1  128.07   36.35
   7  35   2   19.40    5.95
  -7  35  -2   24.62    8.25
  -8   0  11    3.85    2.72
   8   0 -11    6.50    2.74
  -8   0  10   59.43   16.05
   8   0 -10   44.42   14.81
  -8   0   9   11.51    5.77
   8   0  -9    8.17    3.84
  -8   0   8  106.93   12.62
   8   0  -8   89.89    8.85
  -8   0   7    1.87    3.30
   8   0  -7    8.65    4.54
  -8   0   6  939.01   17.72
   8   0  -6  819.46   16.34
  -8   0   5   12.79    4.42
   8   0  -5    3.12    2.63
  -8   0   4  564.74   15.89
   8   0  -4  545.05   14.52
   8   0  -4  468.00   13.01
  -8   0   3    5.37    2.30
   8   0  -3    0.82    1.22
   8   0  -3    0.29    2.01
  -8   0   2  461.68   12.65
   8   0  -2  663.00   16.71
   8   0  -2  516.93   14.64
  -8   0   1    2.26    1.53
   8   0  -1    0.91    1.47
   8   0  -1    2.21    1.43
   8   0  -1    3.42    1.69
  -8   0   0 1278.34   23.07
   8   0   0  952.50   17.11
   8   0   0 1168.70   20.45
   8   0   0  815.29   14.95
  -8   0  -1    3.05    1.06
   8   0   1    1.28    1.54
   8   0   1    5.53    1.93
   8   0   2  467.52   12.43
   8   0   2  502.83   13.30
   8   0   2  505.07   12.89
   8   0   3    3.75    1.86
   8   0   3    3.98    2.30
  -8   0  -3    2.89    1.52
   8   0   3    1.83    1.13
   8   0   4   12.99    3.15
  -8   0  -4   12.74    2.60
   8   0   4   10.63    2.70
   8   0   5    5.06    3.02
  -8   0  -5   -0.90    1.68
   8   0   5    5.20    2.75
   8   0   6  249.13   21.87
  -8   0  -6  164.75   13.48
   8   0   6  245.70   19.49
   8   0   7   -1.53    2.79
  -8   0  -7    2.72    1.92
   8   0   8   12.06    3.60
  -8   0  -8    2.22    1.95
   8   0   9    3.57    2.86
  -8   0  -9    2.63    1.32
   8   0  10    4.13    4.40
  -8   0 -10    1.39    2.48
  -8   2  11   63.02   13.02
   8   2 -11   75.50   14.91
  -8  -2  11   49.91   14.81
   8  -2 -11   27.39   10.95
   8   2 -10  239.96   27.51
  -8   2  10  245.72   28.28
  -8  -2  10  272.35   31.55
   8  -2 -10  247.91   56.88
  -8   2   9   16.50    4.93
   8   2  -9   16.95    6.74
  -8  -2   9   23.95    6.65
   8  -2  -9   18.10    4.24
  -8   2   8   46.63    9.61
   8   2  -8   60.86    7.79
   8  -2  -8   50.36    9.61
  -8  -2   8   49.30    9.17
  -8   2   7  840.70   32.72
   8   2  -7  767.74   30.16
   8  -2  -7  760.68   30.62
  -8  -2   7  903.43   35.01
  -8   2   6 1418.82   53.37
   8   2  -6 1280.14   48.48
   8  -2  -6 1311.05   49.70
  -8  -2   6 1424.49   53.67
  -8   2   5  260.86   17.63
   8   2  -5  261.81   17.51
  -8  -2   5  257.41   17.23
   8  -2  -5  218.55   15.63
  -8   2   4  816.98   21.72
   8   2  -4  706.72   18.54
   8  -2  -4  833.00   21.17
  -8  -2   4  798.96   20.92
   8  -2  -4  723.34   19.04
  -8   2   3  127.22    8.06
   8   2  -3  134.66    9.55
   8   2  -3  149.90   10.96
   8  -2  -3  158.76    9.83
   8  -2  -3  123.70    9.75
  -8  -2   3  137.44    9.02
  -8  -2   3  103.01    6.66
  -8   2   2  889.40   21.83
   8   2  -2 1020.65   25.01
   8   2  -2 1218.51   29.68
   8  -2  -2 1273.91   30.66
   8  -2  -2 1014.84   25.04
  -8   2   1 1655.64   28.85
   8   2  -1 1188.47   21.35
   8   2  -1 1471.45   25.72
   8  -2  -1 1661.67   28.61
   8  -2  -1 1906.97   33.49
  -8  -2   1 1405.30   25.55
   8  -2  -1 1174.64   21.10
  -8   2   0 1821.48   31.25
   8   2   0 1598.40   27.39
   8   2   0 1191.74   21.34
   8   2   0 1081.95   19.05
   8  -2   0 1352.30   23.60
   8  -2   0 1540.44   26.82
   8  -2   0 1033.81   18.74
  -8  -2   0 1625.98   28.69
   8   2   1   86.50    5.52
   8   2   1   85.95    5.73
   8   2   1   94.75    6.18
   8  -2   1  125.19    8.12
  -8  -2  -1  164.34   10.77
   8  -2   1   83.54    5.64
   8  -2   1   84.22    5.51
   8   2   2 1206.01   29.53
   8   2   2 1363.11   32.43
   8   2   2 1190.90   29.38
  -8   2  -2 1542.93   37.04
   8  -2   2 1186.21   28.76
   8  -2   2 1238.33   31.57
   8   2   3    7.36    2.83
   8   2   3    1.90    2.79
   8   2   3    5.27    1.76
  -8   2  -3    4.16    1.32
   8  -2   3    5.32    1.67
  -8  -2  -3    5.52    1.58
   8  -2   3    8.59    3.00
   8  -2   3    6.97    1.84
  -8   2  -4  699.21   21.15
   8   2   4  770.55   23.63
   8   2   4  831.43   24.41
   8  -2   4  800.60   24.46
   8  -2   4  854.52   25.42
  -8  -2  -4  836.43   24.64
   8   2   5  589.12   23.21
  -8   2  -5  440.17   17.41
   8   2   5  603.05   22.92
   8  -2   5  593.78   25.07
  -8  -2  -5  506.19   19.50
   8  -2   5  593.91   22.77
   8   2   6  842.82   31.65
  -8   2  -6  530.31   19.91
   8   2   6  770.24   27.04
   8  -2   6  843.80   30.39
  -8  -2  -6  548.60   19.75
   8   2   7    2.78    2.64
  -8   2  -7   -1.02    2.02
  -8  -2  -7    4.64    2.18
   8  -2   7    6.47    2.53
   8   2   8  188.89   20.26
  -8   2  -8  165.43   19.72
  -8  -2  -8  175.91   18.53
   8  -2   8  211.84   22.65
   8   2   9    0.99    3.97
  -8   2  -9    0.35    2.15
   8  -2   9    8.93    5.70
  -8  -2  -9    1.69    1.65
   8   2  10  229.63   18.16
  -8   2 -10  207.53   15.29
   8  -2  10  251.22   18.89
   8   4 -11   44.09   19.37
  -8   4  11   38.28   16.67
  -8  -4  11   36.70   18.41
   8  -4 -11   44.82   20.93
   8   4 -10  672.89   43.54
  -8   4  10  658.40   43.93
  -8  -4  10  712.97   45.91
   8  -4 -10  563.34   36.61
   8   4  -9    6.18    3.35
  -8   4   9   -0.33    3.50
  -8  -4   9    9.93    4.66
   8  -4  -9    2.60    2.96
  -8   4   8  932.42   47.73
   8   4  -8  912.48   45.03
  -8  -4   8  936.59   46.44
   8  -4  -8  886.80   45.25
  -8   4   7   74.17   13.70
   8   4  -7   68.19   12.27
   8  -4  -7   73.79   17.73
  -8  -4   7   75.78   15.83
  -8   4   6  265.75   13.70
   8   4  -6  271.91   11.63
   8  -4  -6  230.50   46.56
  -8  -4   6  300.57   13.85
  -8   4   5   10.62    4.47
   8   4  -5    7.88    3.02
  -8  -4   5    1.86    2.26
   8  -4  -5    5.12    2.85
  -8   4   4 2183.82   52.92
   8   4  -4 2060.38   51.63
   8  -4  -4 2275.72   54.94
  -8  -4   4 2285.49   55.91
   8  -4  -4 1898.22   46.98
  -8  -4   4 1523.83   37.39
  -8   4   3    5.01    1.35
   8   4  -3    3.09    1.05
   8   4  -3    8.00    2.55
  -8  -4   3    5.26    1.81
   8  -4  -3    2.83    2.18
   8  -4  -3    4.56    1.84
  -8  -4   3    2.79    1.50
  -8   4   2 1053.42   25.48
   8   4  -2 1372.63   33.37
  -8  -4   2  988.61   24.57
   8  -4  -2 1423.00   34.12
   8  -4  -2 1672.32   40.20
   8  -4  -2  914.47   22.84
  -8   4   1  257.81   15.40
   8   4  -1  190.38   11.44
   8   4  -1  210.41   12.82
   8  -4  -1  251.63   16.75
   8  -4  -1  254.99   15.36
  -8  -4   1  188.21   11.88
   8  -4  -1  174.32   14.15
   8   4   0  725.06   17.72
  -8   4   0  869.72   21.16
   8   4   0  558.65   13.85
   8  -4   0  669.65   16.56
  -8  -4   0  744.65   19.20
   8  -4   0  713.46   18.18
   8   4   1   36.70    3.84
   8   4   1   31.56    3.09
   8   4   1   41.85    4.89
   8  -4   1   35.47    2.97
   8  -4   1   45.39    6.55
   8  -4   1   29.80    3.74
  -8  -4  -1   49.30    8.78
   8   4   2 1912.81   46.53
   8   4   2 2252.04   53.76
   8   4   2 1955.55   47.96
  -8   4  -2 2422.71   58.45
   8  -4   2 1723.90   42.10
   8  -4   2 1986.97   48.08
   8   4   3    5.69    2.87
   8   4   3   -0.47    0.97
  -8   4  -3   -0.68    1.75
   8  -4   3    1.33    1.21
  -8  -4  -3    3.63    1.11
   8  -4   3   -0.54    1.78
   8  -4   3    4.87    1.37
   8   4   4  704.11   15.38
   8   4   4  764.65   12.86
   8  -4   4  826.51   14.69
  -8  -4  -4  815.43   13.56
   8  -4   4  769.49   13.74
   8  -4   4  721.10   13.82
   8   4   5   95.15    9.08
   8   4   5  112.13   13.51
  -8   4  -5   72.54    7.65
  -8  -4  -5  105.52   10.09
   8  -4   5  131.33   15.70
   8   4   6  228.64   22.74
  -8   4  -6  184.20   18.17
   8   4   6  224.11   21.42
   8  -4   6  248.21   24.35
  -8  -4  -6  180.48   17.42
   8   4   7   43.52    5.17
  -8   4  -7   34.71    3.61
  -8  -4  -7   17.62    5.71
   8  -4   7   34.36    6.85
   8   4   8 1064.07   49.71
  -8   4  -8  837.44   39.12
   8  -4   8 1048.07   49.08
  -8  -4  -8  765.97   35.53
   8   4   9   45.67   13.35
  -8   4  -9   30.97    9.79
   8  -4   9   57.21   13.14
  -8  -4  -9   36.23    9.16
  -8   4 -10   78.18   16.72
   8   4  10   71.87   25.70
   8  -4  10   58.40   23.40
   8   6 -11    8.10    4.75
  -8   6  11   28.01    6.08
  -8  -6  11   20.76    3.37
   8  -6 -11   18.10    4.77
   8   6 -10   12.44    3.18
  -8   6  10   20.06    6.07
  -8  -6  10   23.43    5.45
   8  -6 -10   22.17    5.70
   8   6  -9  466.39   23.33
  -8   6   9  478.97   24.12
  -8  -6   9  482.51   24.09
   8  -6  -9  428.36   22.07
   8   6  -8   40.98    8.27
  -8   6   8   28.46    7.53
  -8  -6   8   41.60    5.64
   8  -6  -8   28.70    6.92
  -8   6   7  192.37   23.04
   8   6  -7  176.44   20.69
   8  -6  -7  169.98   21.69
  -8  -6   7  194.59   19.61
  -8   6   6  232.01   24.37
[truncated: 136,405 more chars]
