# Supplementary material
Source: MDPI journal article supplement (https://www.mdpi.com/2304-6740/5/3/53)
Supplement: s1 [file s1 › New folder/2-Cl123K.cif]

data_global
_audit_creation_date                               2017-03-26
_audit_creation_method                            'by CrystalStructure 4.2.2'
_audit_update_record                               ?

#==============================================================================
# PROCESSING SUMMARY (IUCr Office Use Only)

_journal_date_recd_electronic                      ?
_journal_date_from_coeditor                        ?
_journal_date_accepted                             ?
_journal_coeditor_code                             ?

#==============================================================================
# SUBMISSION DETAILS

_publ_contact_author_name                         'ENTER NAME'
_publ_contact_author_email                        'ENTER EMAIL ADDRESS'
_publ_contact_author_fax                          'ENTER FAX NUMBER'
_publ_contact_author_phone                        'ENTER PHONE NUMBER'
_publ_contact_letter
;
    ENTER TEXT OF LETTER
;
_publ_requested_journal                           'ENTER JOURNAL NAME HERE'
_publ_requested_category
                                               'CHOOSE FI FM FO CI CM CO or AD'
_publ_requested_coeditor_name                      ?

#==============================================================================
# TITLE AND AUTHOR LIST

_publ_section_title
;
    ENTER SECTION TITLE
;
_publ_section_title_footnote
;
    ENTER FOOTNOTE TO TITLE OF PAPER
;
loop_
_publ_author_name
_publ_author_footnote
_publ_author_address
' FIRST AUTHORS NAME '
;
  FIRST AUTHORS FOOTNOTES
;
;
  FIRST AUTHORS ADDRESS
;
_publ_section_synopsis
;
    ENTER SYNOPSIS
;

#==============================================================================
# TEXT

_publ_section_abstract
;
    ENTER ABSTRACT
;
_publ_section_comment
;
    ENTER TEXT
;
_publ_section_references
;
    ENTER OTHER REFERENCES

    Rigaku (2016). CrystalStructure. Version 4.2.2. 
    Rigaku Corporation, Tokyo, Japan.

    Altomare, A., Burla, M. C., Camalli, M., Cascarano, G. L., 
    Giacovazzo, C., Guagliardi, A., Moliterni, A. G. G., 
    Polidori, G. and Spagna, R. 
    (1999). J. Appl. Cryst. 32, 115-119.
    SIR97

    Sheldrick, G.M. (2008) SHELXL Version 2014/7, Acta Cryst. A64, 112-122.

    Rigaku (1998). REQAB. 
    Rigaku Corporation, Tokyo, Japan.

;
_publ_section_figure_captions
;
    ENTER FIGURE CAPTIONS
;
_publ_section_exptl_prep
;
    ENTER COMPOUND PREPARATION DETAILS
;
_publ_section_exptl_refinement
;
    ENTER SPECIAL DETAILS OF THE REFINEMENT
;

#==============================================================================
data_2-Cl123K

#==============================================================================
# CHEMICAL DATA

_chemical_formula_sum                             'C34 H21 Br2 Cl4 Fe N8 O10'
_chemical_formula_moiety                          'C34 H21 Br2 Cl4 Fe N8 O10'
_chemical_formula_weight                           1059.05
_chemical_melting_point                            ?

#==============================================================================
# CRYSTAL DATA
_space_group_crystal_system                        monoclinic
_space_group_name_H-M_alt                         'C 1 2/c 1'
_space_group_name_Hall                            '-C 2yc'
_space_group_IT_number                             15
loop_
 _space_group_symop_operation_xyz
 'x, y, z'
 '-x, y, -z+1/2'
 'x+1/2, y+1/2, z'
 '-x+1/2, y+1/2, -z+1/2'
 '-x, -y, -z'
 'x, -y, z-1/2'
 '-x+1/2, -y+1/2, -z'
 'x+1/2, -y+1/2, z-1/2'
#------------------------------------------------------------------------------
_cell_length_a                                     12.627(4)
_cell_length_b                                     30.551(9)
_cell_length_c                                     9.519(3)
_cell_angle_alpha                                  90.0000
_cell_angle_beta                                   96.239(7)
_cell_angle_gamma                                  90.0000
_cell_volume                                       3650.6(19)
_cell_formula_units_Z                              4
_cell_measurement_reflns_used                      6991
_cell_measurement_theta_min                        2.15
_cell_measurement_theta_max                        30.63
_cell_measurement_temperature                      123
#------------------------------------------------------------------------------
_exptl_crystal_description                         prism
_exptl_crystal_colour                              colorless
_exptl_crystal_size_max                            0.200
_exptl_crystal_size_mid                            0.200
_exptl_crystal_size_min                            0.200
_exptl_crystal_density_diffrn                      1.927
_exptl_crystal_density_meas                        ?
_exptl_crystal_density_method                     'not measured'
_exptl_crystal_F_000                               2100.00
_exptl_absorpt_coefficient_mu                      2.974
_exptl_absorpt_correction_type                     multi-scan
_exptl_absorpt_process_details                    'REQAB (Rigaku, 1998)'
_exptl_absorpt_correction_T_min                    0.343
_exptl_absorpt_correction_T_max                    0.552

#==============================================================================
# EXPERIMENTAL DATA

_diffrn_ambient_temperature                        123
_diffrn_radiation_type                            'Mo K\a'
_diffrn_radiation_wavelength                       0.71075
_diffrn_measurement_device_type                   'Rigaku Saturn724'
_diffrn_measurement_method                         \w
_diffrn_detector_area_resol_mean                   14.222
_diffrn_reflns_number                              16224
_diffrn_reflns_av_R_equivalents                    0.0989
_diffrn_reflns_theta_max                           27.527
_diffrn_reflns_theta_min                           3.242
_diffrn_reflns_theta_full                          25.242
_diffrn_measured_fraction_theta_max                0.994
_diffrn_measured_fraction_theta_full               0.998
_diffrn_reflns_Laue_measured_fraction_max          0.994
_diffrn_reflns_Laue_measured_fraction_full         0.998
_diffrn_reflns_point_group_measured_fraction_max   0.994
_diffrn_reflns_point_group_measured_fraction_full  0.998
_diffrn_reflns_limit_h_min                        -14
_diffrn_reflns_limit_h_max                         16
_diffrn_reflns_limit_k_min                        -39
_diffrn_reflns_limit_k_max                         39
_diffrn_reflns_limit_l_min                        -12
_diffrn_reflns_limit_l_max                         11
_diffrn_standards_number                           0
_diffrn_standards_interval_count                   .
_diffrn_standards_decay_%                          ?
_reflns_number_total                               4197
_reflns_number_gt                                  3537
_reflns_threshold_expression                       F^2^>2.0\s(F^2^)
_reflns_Friedel_coverage          0.000
_reflns_Friedel_fraction_max      .
_reflns_Friedel_fraction_full     .

#==============================================================================
# REFINEMENT DATA

_refine_special_details
;
    Refinement was performed using all reflections. The weighted 
    R-factor (wR) and goodness of fit (S) are based on F^2^.
    R-factor (gt) are based on F. The threshold expression of
    F^2^ > 2.0 sigma(F^2^) is used only for calculating R-factor (gt).
;
_refine_ls_structure_factor_coef                   Fsqd
_refine_ls_R_factor_all                            0.0778
_refine_ls_R_factor_gt                             0.0636
_refine_ls_wR_factor_ref                           0.1422
_refine_ls_wR_factor_gt                            0.1341
_refine_ls_number_restraints                       0
_refine_ls_hydrogen_treatment                      mixed
_refine_ls_number_reflns                           4197
_refine_ls_number_parameters                       274
_refine_ls_goodness_of_fit_ref                     1.106
_refine_ls_weighting_scheme                        calc
_refine_ls_weighting_details
          'w = 1/[\s^2^(Fo^2^)+(0.0482P)^2^+14.3611P] where P=(Fo^2^+2Fc^2^)/3'
_atom_sites_solution_hydrogens                     geom
_atom_sites_solution_primary                       direct
_atom_sites_solution_secondary                     difmap
_refine_ls_shift/su_max                            0.000
_refine_diff_density_max                           0.62
_refine_diff_density_min                          -0.70
_refine_ls_extinction_method                       none
_refine_ls_extinction_coef                         ?

loop_
_atom_type_symbol
_atom_type_description
_atom_type_scat_dispersion_real
_atom_type_scat_dispersion_imag
_atom_type_scat_source
  'C' 'C'  0.0033 0.0016 
;
International Tables for Crystallography
(Vol. C, Tables 4.2.6.8 and 6.1.1.4)
;
  'H' 'H'  0.0000 0.0000 
;
International Tables for Crystallography
(Vol. C, Table 6.1.1.4)
;
  'N' 'N'  0.0061 0.0033 
;
International Tables for Crystallography
(Vol. C, Tables 4.2.6.8 and 6.1.1.4)
;
  'O' 'O'  0.0106 0.0060 
;
International Tables for Crystallography
(Vol. C, Tables 4.2.6.8 and 6.1.1.4)
;
  'Fe' 'Fe'  0.3463 0.8444 
;
International Tables for Crystallography
(Vol. C, Tables 4.2.6.8 and 6.1.1.4)
;
  'Cl' 'Cl'  0.1484 0.1585 
;
International Tables for Crystallography
(Vol. C, Tables 4.2.6.8 and 6.1.1.4)
;
  'Br' 'Br'  -0.2901 2.4595 
;
International Tables for Crystallography
(Vol. C, Tables 4.2.6.8 and 6.1.1.4)
;

#==============================================================================
# ATOMIC COORDINATES AND THERMAL PARAMETERS

loop_
 _atom_site_label
 _atom_site_type_symbol
 _atom_site_fract_x
 _atom_site_fract_y
 _atom_site_fract_z
 _atom_site_U_iso_or_equiv
 _atom_site_adp_type
 _atom_site_occupancy
 _atom_site_site_symmetry_order  
 _atom_site_calc_flag
 _atom_site_refinement_flags_posn
 _atom_site_refinement_flags_adp
 _atom_site_refinement_flags_occupancy
 _atom_site_disorder_assembly
 _atom_site_disorder_group
Br1 Br 0.86098(4) 0.33672(2) 0.24956(5) 0.02813(17) Uani 1 1 d . . . . .
Fe1 Fe 0.5000 0.15253(3) 0.2500 0.0170(2) Uani 1 2 d S T P . .
Cl1 Cl 0.82243(9) 0.02208(4) 0.25629(12) 0.0237(3) Uani 1 1 d . . . . .
Cl2 Cl 0.95151(9) 0.09744(4) 0.42188(12) 0.0246(3) Uani 1 1 d . . . . .
O1 O 0.5582(2) 0.19403(10) 0.3779(3) 0.0205(7) Uani 1 1 d . . . . .
O2 O 0.4545(3) 0.25788(13) 0.4856(4) 0.0391(10) Uani 1 1 d . . . . .
O3 O 0.5631(3) 0.30518(11) 0.5892(3) 0.0261(8) Uani 1 1 d . . . . .
O4 O 0.7809(3) -0.07346(11) 0.4053(3) 0.0257(8) Uani 1 1 d . . . . .
O5 O 0.9047(3) -0.09330(11) 0.2672(3) 0.0260(8) Uani 1 1 d . . . . .
N1 N 0.4569(3) 0.10620(12) 0.1122(4) 0.0202(8) Uani 1 1 d . . . . .
N2 N 0.6360(3) 0.11095(12) 0.0867(4) 0.0190(8) Uani 1 1 d . . . . .
N3 N 0.6290(3) 0.14988(12) 0.1599(4) 0.0186(8) Uani 1 1 d . . . . .
N4 N 0.5402(3) 0.27702(12) 0.4988(4) 0.0220(8) Uani 1 1 d . . . . .
C1 C 0.5384(4) 0.09187(15) 0.0446(5) 0.0195(9) Uani 1 1 d . . . . .
C2 C 0.5268(4) 0.05897(15) -0.0575(5) 0.0250(10) Uani 1 1 d . . . . .
H1 H 0.5860 0.0485 -0.1012 0.030 Uiso 1 1 calc R U . . .
C3 C 0.4265(4) 0.04227(17) -0.0924(5) 0.0295(11) Uani 1 1 d . . . . .
H2 H 0.4158 0.0198 -0.1616 0.035 Uiso 1 1 calc R U . . .
C4 C 0.3400(4) 0.05792(17) -0.0272(5) 0.0275(11) Uani 1 1 d . . . . .
H3 H 0.2703 0.0468 -0.0526 0.033 Uiso 1 1 calc R U . . .
C5 C 0.3582(4) 0.08956(16) 0.0739(5) 0.0257(11) Uani 1 1 d . . . . .
H4 H 0.2999 0.1003 0.1189 0.031 Uiso 1 1 calc R U . . .
C6 C 0.7109(3) 0.17590(14) 0.1737(4) 0.0157(9) Uani 1 1 d . . . . .
C7 C 0.8123(4) 0.16328(15) 0.1149(5) 0.0213(10) Uani 1 1 d . . . . .
H6C H 0.8023 0.1656 0.0116 0.026 Uiso 1 1 calc R U . . .
H7A H 0.8310 0.1331 0.1422 0.026 Uiso 1 1 calc R U . . .
H8B H 0.8697 0.1830 0.1526 0.026 Uiso 1 1 calc R U . . .
C8 C 0.7016(3) 0.21771(14) 0.2461(4) 0.0171(9) Uani 1 1 d . . . . .
C9 C 0.7715(3) 0.25162(15) 0.2221(5) 0.0202(9) Uani 1 1 d . . . . .
H9 H 0.8250 0.2469 0.1609 0.024 Uiso 1 1 calc R U . . .
C10 C 0.7640(4) 0.29179(15) 0.2857(5) 0.0221(10) Uani 1 1 d . . . . .
C11 C 0.6888(4) 0.30016(15) 0.3773(5) 0.0192(9) Uani 1 1 d . . . . .
H10 H 0.6851 0.3279 0.4217 0.023 Uiso 1 1 calc R U . . .
C12 C 0.6194(4) 0.26700(15) 0.4023(5) 0.0200(9) Uani 1 1 d . . . . .
C13 C 0.6215(3) 0.22466(14) 0.3407(5) 0.0184(9) Uani 1 1 d . . . . .
C14 C 0.8692(4) -0.06982(15) 0.3631(5) 0.0210(10) Uani 1 1 d . . . . .
C15 C 0.9405(3) -0.03346(14) 0.4291(5) 0.0183(9) Uani 1 1 d . . . . .
C16 C 0.9197(3) 0.00983(15) 0.3940(5) 0.0191(9) Uani 1 1 d . . . . .
C17 C 0.9779(3) 0.04324(14) 0.4648(5) 0.0176(9) Uani 1 1 d . . . . .
H5 H 0.687(4) 0.1076(15) 0.035(5) 0.018(12) Uiso 1 1 d . . . . .
H11 H 1.0000 -0.091(4) 0.2500 0.12(5) Uiso 1 2 d S . P . .

loop_
 _atom_site_aniso_label
 _atom_site_aniso_U_11
 _atom_site_aniso_U_22
 _atom_site_aniso_U_33
 _atom_site_aniso_U_23
 _atom_site_aniso_U_13
 _atom_site_aniso_U_12
Br1 0.0262(3) 0.0272(3) 0.0315(3) 0.0022(2) 0.0053(2) -0.00924(19)
Fe1 0.0162(5) 0.0177(4) 0.0179(5) 0.000 0.0055(4) 0.000
Cl1 0.0222(6) 0.0261(6) 0.0222(5) 0.0004(5) 0.0001(5) 0.0011(4)
Cl2 0.0268(6) 0.0197(5) 0.0274(6) 0.0027(5) 0.0039(5) 0.0004(4)
O1 0.0219(17) 0.0204(16) 0.0209(16) -0.0028(13) 0.0103(13) -0.0040(13)
O2 0.026(2) 0.041(2) 0.054(2) -0.0188(19) 0.0182(18) -0.0119(17)
O3 0.0274(19) 0.0243(18) 0.0269(17) -0.0081(15) 0.0038(15) 0.0011(14)
O4 0.0193(17) 0.0307(19) 0.0278(18) 0.0010(15) 0.0059(14) -0.0040(14)
O5 0.0265(19) 0.0248(18) 0.0279(18) -0.0057(14) 0.0080(15) -0.0025(14)
N1 0.022(2) 0.022(2) 0.0179(18) 0.0011(16) 0.0060(15) -0.0003(16)
N2 0.0173(19) 0.022(2) 0.0192(19) -0.0039(16) 0.0081(16) -0.0021(15)
N3 0.0182(19) 0.0183(19) 0.0199(19) -0.0017(16) 0.0047(15) 0.0015(15)
N4 0.022(2) 0.022(2) 0.022(2) -0.0051(16) 0.0041(16) 0.0030(16)
C1 0.025(2) 0.020(2) 0.014(2) 0.0008(18) 0.0049(18) 0.0013(18)
C2 0.030(3) 0.023(2) 0.024(2) -0.002(2) 0.010(2) -0.002(2)
C3 0.034(3) 0.032(3) 0.023(2) -0.002(2) 0.006(2) -0.007(2)
C4 0.025(3) 0.033(3) 0.025(2) -0.001(2) 0.005(2) -0.010(2)
C5 0.024(3) 0.031(3) 0.024(2) 0.003(2) 0.008(2) -0.002(2)
C6 0.014(2) 0.020(2) 0.014(2) 0.0009(17) 0.0036(16) 0.0008(17)
C7 0.015(2) 0.023(2) 0.028(2) -0.0041(19) 0.0095(19) 0.0008(17)
C8 0.016(2) 0.021(2) 0.014(2) 0.0018(18) 0.0029(17) 0.0029(17)
C9 0.014(2) 0.026(2) 0.022(2) 0.0010(19) 0.0066(18) -0.0017(18)
C10 0.019(2) 0.022(2) 0.026(2) 0.0055(19) 0.0042(19) -0.0011(18)
C11 0.021(2) 0.016(2) 0.020(2) -0.0011(18) 0.0009(18) 0.0014(17)
C12 0.022(2) 0.019(2) 0.020(2) -0.0026(18) 0.0075(19) -0.0003(18)
C13 0.015(2) 0.021(2) 0.018(2) -0.0002(18) -0.0024(18) -0.0012(17)
C14 0.025(2) 0.020(2) 0.018(2) 0.0059(18) 0.0030(19) -0.0034(18)
C15 0.014(2) 0.022(2) 0.020(2) 0.0015(18) 0.0060(17) -0.0001(17)
C16 0.016(2) 0.022(2) 0.019(2) 0.0030(18) 0.0043(17) -0.0020(17)
C17 0.016(2) 0.020(2) 0.018(2) 0.0034(18) 0.0059(17) 0.0013(17)

#==============================================================================
_computing_data_collection
                                             'CrystalClear (Rigaku Inc., 2008)'
_computing_cell_refinement                         CrystalClear
_computing_data_reduction                          CrystalClear
_computing_structure_solution                      SIR97
_computing_structure_refinement
                                      'SHELXL Version 2014/7 (Sheldrick, 2008)'
_computing_publication_material
                                        'CrystalStructure 4.2.2 (Rigaku, 2016)'
_computing_molecular_graphics                     'CrystalStructure 4.2.2'

#==============================================================================
# MOLECULAR GEOMETRY

_geom_special_details
;
 All esds (except the esd in the dihedral angle between two l.s. planes)
 are estimated using the full covariance matrix.  The cell esds are taken
 into account individually in the estimation of esds in distances, angles
 and torsion angles; correlations between esds in cell parameters are only
 used when they are defined by crystal symmetry.  An approximate (isotropic)
 treatment of cell esds is used for estimating esds involving l.s. planes.
;

loop_
 _geom_bond_atom_site_label_1
 _geom_bond_atom_site_label_2
 _geom_bond_distance
 _geom_bond_site_symmetry_2
 _geom_bond_publ_flag
Br1 C10 1.896(5) . ?
Fe1 O1 1.853(3) . ?
Fe1 O1 1.854(3) 2_655 ?
Fe1 N3 1.923(4) 2_655 ?
Fe1 N3 1.923(4) . ?
Fe1 N1 1.966(4) . ?
Fe1 N1 1.966(4) 2_655 ?
Cl1 C16 1.736(5) . ?
Cl2 C17 1.729(4) . ?
O1 C13 1.305(5) . ?
O2 N4 1.224(5) . ?
O3 N4 1.229(5) . ?
O4 C14 1.230(5) . ?
O5 C14 1.280(5) . ?
O5 H11 1.235(9) . ?
N1 C1 1.345(5) . ?
N1 C5 1.358(6) . ?
N2 C1 1.382(6) . ?
N2 N3 1.386(5) . ?
N2 H5 0.86(5) . ?
N3 C6 1.300(6) . ?
N4 C12 1.462(5) . ?
C1 C2 1.395(6) . ?
C2 C3 1.372(7) . ?
C2 H1 0.9500 . ?
C3 C4 1.398(7) . ?
C3 H2 0.9500 . ?
C4 C5 1.365(7) . ?
C4 H3 0.9500 . ?
C5 H4 0.9500 . ?
C6 C8 1.462(6) . ?
C6 C7 1.503(6) . ?
C7 H6C 0.9800 . ?
C7 H7A 0.9800 . ?
C7 H8B 0.9800 . ?
C8 C9 1.396(6) . ?
C8 C13 1.441(6) . ?
C9 C10 1.376(6) . ?
C9 H9 0.9500 . ?
C10 C11 1.381(6) . ?
C11 C12 1.377(6) . ?
C11 H10 0.9500 . ?
C12 C13 1.422(6) . ?
C14 C15 1.522(6) . ?
C15 C16 1.382(6) . ?
C15 C17 1.394(6) 5_756 ?
C16 C17 1.389(6) . ?
C17 C15 1.394(6) 5_756 ?

loop_
 _geom_angle_atom_site_label_1
 _geom_angle_atom_site_label_2
 _geom_angle_atom_site_label_3
 _geom_angle
 _geom_angle_site_symmetry_1
 _geom_angle_site_symmetry_3
 _geom_angle_publ_flag
O1 Fe1 O1 93.7(2) . 2_655 ?
O1 Fe1 N3 91.73(14) . 2_655 ?
O1 Fe1 N3 91.57(14) 2_655 2_655 ?
O1 Fe1 N3 91.57(14) . . ?
O1 Fe1 N3 91.73(14) 2_655 . ?
N3 Fe1 N3 175.2(2) 2_655 . ?
O1 Fe1 N1 172.75(14) . . ?
O1 Fe1 N1 89.59(15) 2_655 . ?
N3 Fe1 N1 94.65(15) 2_655 . ?
N3 Fe1 N1 81.86(16) . . ?
O1 Fe1 N1 89.59(15) . 2_655 ?
O1 Fe1 N1 172.75(14) 2_655 2_655 ?
N3 Fe1 N1 81.86(16) 2_655 2_655 ?
N3 Fe1 N1 94.65(15) . 2_655 ?
N1 Fe1 N1 87.9(2) . 2_655 ?
C13 O1 Fe1 121.6(3) . . ?
C14 O5 H11 119(4) . . ?
C1 N1 C5 118.5(4) . . ?
C1 N1 Fe1 112.5(3) . . ?
C5 N1 Fe1 128.9(3) . . ?
C1 N2 N3 113.8(4) . . ?
C1 N2 H5 119(3) . . ?
N3 N2 H5 119(3) . . ?
C6 N3 N2 118.8(4) . . ?
C6 N3 Fe1 129.2(3) . . ?
N2 N3 Fe1 111.3(3) . . ?
O2 N4 O3 123.0(4) . . ?
O2 N4 C12 119.5(4) . . ?
O3 N4 C12 117.5(4) . . ?
N1 C1 N2 115.4(4) . . ?
N1 C1 C2 122.7(4) . . ?
N2 C1 C2 121.9(4) . . ?
C3 C2 C1 117.5(4) . . ?
C3 C2 H1 121.3 . . ?
C1 C2 H1 121.3 . . ?
C2 C3 C4 120.7(5) . . ?
C2 C3 H2 119.7 . . ?
C4 C3 H2 119.7 . . ?
C5 C4 C3 118.4(5) . . ?
C5 C4 H3 120.8 . . ?
C3 C4 H3 120.8 . . ?
N1 C5 C4 122.2(4) . . ?
N1 C5 H4 118.9 . . ?
C4 C5 H4 118.9 . . ?
N3 C6 C8 118.6(4) . . ?
N3 C6 C7 120.4(4) . . ?
C8 C6 C7 121.0(4) . . ?
C6 C7 H6C 109.5 . . ?
C6 C7 H7A 109.5 . . ?
H6C C7 H7A 109.5 . . ?
C6 C7 H8B 109.5 . . ?
H6C C7 H8B 109.5 . . ?
H7A C7 H8B 109.5 . . ?
C9 C8 C13 119.5(4) . . ?
C9 C8 C6 119.1(4) . . ?
C13 C8 C6 121.4(4) . . ?
C10 C9 C8 121.0(4) . . ?
C10 C9 H9 119.5 . . ?
C8 C9 H9 119.5 . . ?
C9 C10 C11 121.9(4) . . ?
C9 C10 Br1 119.3(3) . . ?
C11 C10 Br1 118.8(3) . . ?
C12 C11 C10 117.8(4) . . ?
C12 C11 H10 121.1 . . ?
C10 C11 H10 121.1 . . ?
C11 C12 C13 123.9(4) . . ?
C11 C12 N4 116.5(4) . . ?
C13 C12 N4 119.6(4) . . ?
O1 C13 C12 120.1(4) . . ?
O1 C13 C8 123.8(4) . . ?
C12 C13 C8 116.0(4) . . ?
O4 C14 O5 125.6(4) . . ?
O4 C14 C15 116.6(4) . . ?
O5 C14 C15 117.8(4) . . ?
C16 C15 C17 119.1(4) . 5_756 ?
C16 C15 C14 120.7(4) . . ?
C17 C15 C14 120.0(4) 5_756 . ?
C15 C16 C17 120.6(4) . . ?
C15 C16 Cl1 119.3(4) . . ?
C17 C16 Cl1 120.1(3) . . ?
C16 C17 C15 120.3(4) . 5_756 ?
C16 C17 Cl2 120.7(4) . . ?
C15 C17 Cl2 119.0(4) 5_756 . ?

loop_
 _geom_torsion_atom_site_label_1
 _geom_torsion_atom_site_label_2
 _geom_torsion_atom_site_label_3
 _geom_torsion_atom_site_label_4
 _geom_torsion
 _geom_torsion_site_symmetry_1
 _geom_torsion_site_symmetry_2
 _geom_torsion_site_symmetry_3
 _geom_torsion_site_symmetry_4
 _geom_torsion_publ_flag
O1 Fe1 O1 C13 -54.7(3) 2_655 . . . ?
N3 Fe1 O1 C13 -146.4(3) 2_655 . . . ?
N3 Fe1 O1 C13 37.1(3) . . . . ?
N1 Fe1 O1 C13 131.8(3) 2_655 . . . ?
C1 N2 N3 C6 -163.1(4) . . . . ?
C1 N2 N3 Fe1 25.2(4) . . . . ?
C5 N1 C1 N2 178.5(4) . . . . ?
Fe1 N1 C1 N2 1.9(5) . . . . ?
C5 N1 C1 C2 -3.6(7) . . . . ?
Fe1 N1 C1 C2 179.8(4) . . . . ?
N3 N2 C1 N1 -17.8(5) . . . . ?
N3 N2 C1 C2 164.3(4) . . . . ?
N1 C1 C2 C3 2.5(7) . . . . ?
N2 C1 C2 C3 -179.7(4) . . . . ?
C1 C2 C3 C4 0.0(7) . . . . ?
C2 C3 C4 C5 -1.3(8) . . . . ?
C1 N1 C5 C4 2.1(7) . . . . ?
Fe1 N1 C5 C4 178.2(4) . . . . ?
C3 C4 C5 N1 0.2(7) . . . . ?
N2 N3 C6 C8 177.6(4) . . . . ?
Fe1 N3 C6 C8 -12.3(6) . . . . ?
N2 N3 C6 C7 -1.8(6) . . . . ?
Fe1 N3 C6 C7 168.3(3) . . . . ?
N3 C6 C8 C9 -158.7(4) . . . . ?
C7 C6 C8 C9 20.7(6) . . . . ?
N3 C6 C8 C13 20.8(6) . . . . ?
C7 C6 C8 C13 -159.8(4) . . . . ?
C13 C8 C9 C10 -1.0(7) . . . . ?
C6 C8 C9 C10 178.6(4) . . . . ?
C8 C9 C10 C11 1.0(7) . . . . ?
C8 C9 C10 Br1 180.0(3) . . . . ?
C9 C10 C11 C12 -0.9(7) . . . . ?
Br1 C10 C11 C12 -179.8(4) . . . . ?
C10 C11 C12 C13 0.8(7) . . . . ?
C10 C11 C12 N4 -179.5(4) . . . . ?
O2 N4 C12 C11 151.7(5) . . . . ?
O3 N4 C12 C11 -27.3(6) . . . . ?
O2 N4 C12 C13 -28.5(7) . . . . ?
O3 N4 C12 C13 152.5(4) . . . . ?
Fe1 O1 C13 C12 145.4(4) . . . . ?
Fe1 O1 C13 C8 -39.4(6) . . . . ?
C11 C12 C13 O1 174.9(4) . . . . ?
N4 C12 C13 O1 -4.8(7) . . . . ?
C11 C12 C13 C8 -0.7(7) . . . . ?
N4 C12 C13 C8 179.6(4) . . . . ?
C9 C8 C13 O1 -174.6(4) . . . . ?
C6 C8 C13 O1 5.9(7) . . . . ?
C9 C8 C13 C12 0.8(6) . . . . ?
C6 C8 C13 C12 -178.7(4) . . . . ?
O4 C14 C15 C16 -73.5(5) . . . . ?
O5 C14 C15 C16 105.1(5) . . . . ?
O4 C14 C15 C17 100.8(5) . . . 5_756 ?
O5 C14 C15 C17 -80.6(5) . . . 5_756 ?
C17 C15 C16 C17 -1.1(7) 5_756 . . . ?
C14 C15 C16 C17 173.3(4) . . . . ?
C17 C15 C16 Cl1 177.0(3) 5_756 . . . ?
C14 C15 C16 Cl1 -8.7(5) . . . . ?
C15 C16 C17 C15 1.1(7) . . . 5_756 ?
Cl1 C16 C17 C15 -176.9(3) . . . 5_756 ?
C15 C16 C17 Cl2 -179.6(3) . . . . ?
Cl1 C16 C17 Cl2 2.4(5) . . . . ?

#==============================================================================
loop_
_geom_hbond_atom_site_label_D
_geom_hbond_atom_site_label_H
_geom_hbond_atom_site_label_A
_geom_hbond_site_symmetry_D
_geom_hbond_site_symmetry_H
_geom_hbond_site_symmetry_A
_geom_hbond_distance_DA
_geom_hbond_distance_DH
_geom_hbond_distance_HA
_geom_hbond_angle_DHA
_geom_hbond_publ_flag
N2 H5 O4 . . 6_555 2.886(5) 0.86(5) 2.08(5) 155(4) no
N2 H5 N3 . . . 1.386(5) 0.86(5) 1.95(5) 38(2) no

#==============================================================================
# Additional structures and associated data_? identifiers
# should be added at this point if there is more than one 
# structure analysis in the CIF.

_shelx_res_file
;

    shelxl.res created by SHELXL-2014/7

TITL fr1375
CELL  0.71075 12.62730 30.55100 9.51930 90.00000 96.23910 90.00000
ZERR  4 0.00370 0.00880 0.00290 0.00000 0.00740 0.00000
LATT 7
SYMM    -X,    +Y, .50-Z
SFAC C H N O FE CL BR
UNIT 136 84 32 40 4 16 8
L.S. 10
FMAP 2
PLAN 25
WPDB -2
HTAB
BOND $H
CONF
LIST 4
TEMP -149.8
ACTA
SIZE 0.200 0.200 0.200
WGHT    0.048200   14.361101
FVAR       0.46535
BR1   7    0.860976    0.336719    0.249561    11.00000    0.02623    0.02717 =
         0.03146    0.00217    0.00529   -0.00924
FE1   5    0.500000    0.152531    0.250000    10.50000    0.01622    0.01775 =
         0.01792    0.00000    0.00547    0.00000
CL1   6    0.822433    0.022076    0.256285    11.00000    0.02220    0.02608 =
         0.02224    0.00044    0.00011    0.00106
CL2   6    0.951513    0.097438    0.421884    11.00000    0.02679    0.01972 =
         0.02743    0.00269    0.00386    0.00037
O1    4    0.558183    0.194034    0.377902    11.00000    0.02191    0.02035 =
         0.02090   -0.00276    0.01034   -0.00397
O2    4    0.454514    0.257878    0.485598    11.00000    0.02585    0.04088 =
         0.05360   -0.01882    0.01823   -0.01186
O3    4    0.563138    0.305181    0.589248    11.00000    0.02742    0.02427 =
         0.02689   -0.00811    0.00384    0.00106
O4    4    0.780882   -0.073461    0.405319    11.00000    0.01926    0.03069 =
         0.02779    0.00102    0.00591   -0.00398
O5    4    0.904674   -0.093299    0.267218    11.00000    0.02647    0.02478 =
         0.02792   -0.00566    0.00796   -0.00254
N1    3    0.456915    0.106202    0.112167    11.00000    0.02167    0.02193 =
         0.01792    0.00106    0.00602   -0.00035
N2    3    0.635957    0.110951    0.086681    11.00000    0.01729    0.02202 =
         0.01916   -0.00389    0.00806   -0.00213
N3    3    0.628963    0.149884    0.159885    11.00000    0.01822    0.01835 =
         0.01994   -0.00173    0.00473    0.00148
N4    3    0.540198    0.277017    0.498786    11.00000    0.02233    0.02190 =
         0.02219   -0.00512    0.00411    0.00298
C1    1    0.538411    0.091867    0.044632    11.00000    0.02517    0.01996 =
         0.01402    0.00085    0.00487    0.00125
C2    1    0.526779    0.058967   -0.057503    11.00000    0.03008    0.02280 =
         0.02376   -0.00234    0.01021   -0.00207
AFIX  43
H1    2    0.586027    0.048523   -0.101233    11.00000   -1.20000
AFIX   0
C3    1    0.426534    0.042274   -0.092374    11.00000    0.03395    0.03173 =
         0.02336   -0.00241    0.00616   -0.00664
AFIX  43
H2    2    0.415773    0.019840   -0.161560    11.00000   -1.20000
AFIX   0
C4    1    0.340048    0.057920   -0.027192    11.00000    0.02468    0.03327 =
         0.02492   -0.00145    0.00499   -0.01029
AFIX  43
H3    2    0.270317    0.046818   -0.052579    11.00000   -1.20000
AFIX   0
C5    1    0.358244    0.089556    0.073875    11.00000    0.02358    0.03130 =
         0.02351    0.00331    0.00822   -0.00221
AFIX  43
H4    2    0.299923    0.100287    0.118936    11.00000   -1.20000
AFIX   0
C6    1    0.710858    0.175901    0.173683    11.00000    0.01353    0.01982 =
         0.01432    0.00089    0.00356    0.00077
C7    1    0.812289    0.163285    0.114929    11.00000    0.01463    0.02313 =
         0.02785   -0.00409    0.00948    0.00082
AFIX 137
H6C   2    0.802305    0.165560    0.011647    11.00000   -1.20000
H7A   2    0.830970    0.133094    0.142178    11.00000   -1.20000
H8B   2    0.869748    0.182971    0.152638    11.00000   -1.20000
AFIX   0
C8    1    0.701637    0.217711    0.246148    11.00000    0.01640    0.02066 =
         0.01447    0.00184    0.00291    0.00290
C9    1    0.771525    0.251624    0.222068    11.00000    0.01429    0.02562 =
         0.02173    0.00098    0.00665   -0.00169
AFIX  43
H9    2    0.825041    0.246912    0.160856    11.00000   -1.20000
AFIX   0
C10   1    0.764016    0.291787    0.285729    11.00000    0.01923    0.02188 =
         0.02571    0.00554    0.00424   -0.00108
C11   1    0.688810    0.300163    0.377347    11.00000    0.02092    0.01610 =
         0.02017   -0.00109    0.00091    0.00139
AFIX  43
H10   2    0.685095    0.327895    0.421693    11.00000   -1.20000
AFIX   0
C12   1    0.619389    0.267000    0.402306    11.00000    0.02157    0.01943 =
         0.02022   -0.00265    0.00749   -0.00025
C13   1    0.621523    0.224660    0.340744    11.00000    0.01546    0.02067 =
         0.01811   -0.00019   -0.00239   -0.00119
C14   1    0.869161   -0.069815    0.363119    11.00000    0.02469    0.02005 =
         0.01843    0.00589    0.00296   -0.00338
C15   1    0.940485   -0.033458    0.429087    11.00000    0.01372    0.02203 =
         0.01994    0.00149    0.00605   -0.00015
C16   1    0.919668    0.009833    0.393952    11.00000    0.01618    0.02247 =
         0.01910    0.00299    0.00428   -0.00202
C17   1    0.977926    0.043243    0.464842    11.00000    0.01570    0.01989 =
         0.01820    0.00344    0.00594    0.00133
H5    2    0.687363    0.107600    0.035228    11.00000    0.01786
H11   2    1.000000   -0.090601    0.250000    10.50000    0.11670
HKLF 4

REM  fr1375
REM R1 =  0.0636 for    3537 Fo > 4sig(Fo)  and  0.0778 for all    4197 data
REM    274 parameters refined using      0 restraints

END

WGHT      0.0482     14.3517

REM Instructions for potential hydrogen bonds
EQIV $1 x, -y, z-1/2
HTAB C2 O4_$1
EQIV $2 -x+3/2, -y+1/2, -z
HTAB C7 Br1_$2
EQIV $3 -x+3/2, -y+1/2, -z+1
HTAB C7 O3_$3
EQIV $4 x+1/2, -y+1/2, z-1/2
HTAB C7 O3_$4
HTAB C9 O2_$4
HTAB N2 O4_$1
EQIV $5 -x+2, y, -z+1/2
HTAB O5 O5_$5

REM Highest difference peak  0.621,  deepest hole -0.695,  1-sigma level  0.142
Q1    1   0.9635  0.3388  0.2528  11.00000  0.05    0.62
Q2    1   0.5634  0.2054  0.5152  11.00000  0.05    0.61
Q3    1   0.8584  0.3715  0.3462  11.00000  0.05    0.60
Q4    1   0.7043  0.2126  0.0177  11.00000  0.05    0.56
Q5    1   0.9237  0.0278  0.2514  11.00000  0.05    0.56
Q6    1   0.8570  0.1011  0.0188  11.00000  0.05    0.54
Q7    1   0.7581  0.2890  0.1528  11.00000  0.05    0.53
Q8    1   0.5021  0.1210  0.1583  11.00000  0.05    0.53
Q9    1   0.5984  0.1528  0.2266  11.00000  0.05    0.53
Q10   1   0.8627  0.1507 -0.0799  11.00000  0.05    0.52
Q11   1   0.5593  0.1175 -0.1058  11.00000  0.05    0.52
Q12   1   0.7139  0.2005 -0.0638  11.00000  0.05    0.52
Q13   1   0.8947  0.2716  0.2148  11.00000  0.05    0.52
Q14   1   0.8639  0.3047  0.1600  11.00000  0.05    0.52
Q15   1   0.8646  0.3006  0.3361  11.00000  0.05    0.52
Q16   1   0.9044  0.1896  0.2522  11.00000  0.05    0.51
Q17   1   0.9058  0.2493  0.1295  11.00000  0.05    0.50
Q18   1   0.4934  0.1336  0.0456  11.00000  0.05    0.50
Q19   1   0.6835  0.1510  0.2534  11.00000  0.05    0.49
Q20   1   0.3595  0.1223 -0.0516  11.00000  0.05    0.49
Q21   1   0.8567 -0.0213  0.2477  11.00000  0.05    0.48
Q22   1   0.6401  0.1912  0.0646  11.00000  0.05    0.47
Q23   1   0.5558  0.3389  0.5048  11.00000  0.05    0.47
Q24   1   0.7639 -0.0068  0.2567  11.00000  0.05    0.47
Q25   1   0.5000  0.2000  0.2500  10.50000  0.05    0.45
;

_shelx_res_checksum   32791

_shelx_hkl_file
;
   0   0  -2 9832.56  261.15
   0   0  -2 9442.01  232.27
   0   0  -2 9341.20  251.29
   0   0   2 9215.28  250.11
   0   0  -3   41.15   22.72
   0   0  -3   -3.17   11.03
   0   0  -3  -15.92   36.52
   0   0  -4 7368.34  269.97
   0   0  -4 7202.52  236.60
   0   0  -4 6851.26  279.46
   0   0  -5   79.98   40.54
   0   0  -5   35.12   15.05
   0   0  -5   -3.28   46.36
   0   0  -642605.92 3841.81
   0   0  -641008.98 1550.71
   0   0  -639952.09 1543.59
   0   0  -7   80.95   41.44
   0   0  -7    9.10   16.25
   0   0  -7   63.88   31.57
   0   0  -8 6912.74  524.82
   0   0  -8 9885.41   98.27
   0   0  -9   26.81   32.62
   0   0  -9    0.25   14.11
   0   0  -9    9.24   29.02
   0   0 -10 3037.25  352.03
   0   0 -11   60.32   32.34
   0   0 -12 4814.32  712.99
   0   2   2 8973.20  235.49
   0   2  -2 8336.51  230.54
   0   2  -2 8821.88  219.43
   0  -2   2 8063.26  200.02
   0  -2   2 8620.51  240.99
   0  -2  -2 7679.62  199.54
   0  -2  -2 8311.33  206.61
   0   2  -319279.58  504.08
   0   2   319817.56  506.79
   0   2  -321384.47  523.49
   0   2  -321699.79  560.31
   0  -2   320499.64  537.80
   0  -2  -320567.94  525.59
   0   2  -4 1176.04  198.15
   0   2  -4 1075.14   66.31
   0   2  -4 1414.53  199.07
   0  -2  -4  833.32   61.76
   0  -2  -4 1209.58   71.91
   0  -2   4 1264.46  248.45
   0  -2  -4 1137.90  185.92
   0   2  -5 1487.88  278.42
   0   2  -5 1557.66  156.52
   0   2  -5 1880.87  313.58
   0  -2  -5 1125.33  137.48
   0  -2  -5 1530.14  204.89
   0  -2   5 1623.02  171.37
   0  -2  -5 1528.37  136.12
   0   2  -6 1033.91  187.85
   0   2  -6  948.12  141.16
   0   2  -6  925.14   92.79
   0  -2  -6  777.30   75.70
   0  -2  -6  799.25  242.60
   0  -2  -6  604.58  123.24
   0   2  -7  442.46   80.40
   0   2  -7  400.64   85.55
   0   2  -7  394.82   73.07
   0  -2  -7  443.44   95.73
   0  -2  -7  521.50   93.08
   0  -2  -7  123.41   54.87
   0  -2  -7  412.42   81.76
   0   2  -8 1316.72  218.00
   0   2  -8 1600.23  160.17
   0  -2  -8 1579.45  124.50
   0  -2  -8 1647.27  181.62
   0   2  -9 1087.27  139.96
   0  -2  -9  461.73  157.79
   0  -2  -9 1040.80  146.74
   0  -2  -9 1246.25  194.68
   0   2 -10    2.80   24.20
   0  -2 -10   22.61   20.00
   0  -2 -10   22.23   27.33
   0   2 -11  119.62   42.71
   0   2 -11   31.82   23.76
   0   2 -12   31.37   34.66
   0  -2 -12   32.07   31.43
   0   4   1   75.25    8.68
   0   4  -1  185.93   57.18
   0   4  -1   82.41   18.39
   0   4   1   98.99   13.40
   0  -4   1  102.95   23.55
   0  -4   1   23.68   40.32
   0  -4  -1   94.59   13.63
   0  -4  -1  102.19   15.49
   0   4   2 2662.68   82.38
   0   4  -2 2417.64  107.45
   0   4  -2 2468.23   70.93
   0   4   2 2549.72   68.99
   0  -4   2 2328.26  104.59
   0  -4  -2 3032.87   80.41
   0  -4  -2 2475.19   66.57
   0  -4   2 2585.48   72.07
   0   4   3 9545.63  259.39
   0   4  -3 9099.56  230.47
   0   4  -3 8970.66  263.68
   0  -4   3 8791.42  221.88
   0  -4   3 8748.99  268.01
   0  -4  -3 9481.49  237.32
   0   4   4   86.62   36.32
   0   4  -4  131.45   46.83
   0   4  -4   43.19   49.32
   0   4  -4  125.72   26.62
   0  -4   4  128.34   65.15
   0  -4  -4  107.31   34.44
   0  -4  -4  115.45   29.04
   0  -4  -4  102.06   25.43
   0   4  -5 7730.32  259.56
   0   4  -5 7330.21  283.81
   0  -4  -5 7826.08  272.32
   0  -4  -5 7721.51  253.61
   0  -4   5 7464.99  354.25
   0  -4  -5 7657.15  325.44
   0  -4  -5 7586.00  262.39
   0   4  -6 4371.63  423.67
   0   4  -6 4072.31  172.81
   0   4  -6 3870.43  205.34
   0  -4  -6 3828.40  168.51
   0  -4   6 4293.53  228.70
   0  -4  -6 3768.94  188.36
   0  -4  -6 4033.44  159.40
   0  -4  -6 4253.75  180.95
   0   4  -7 1207.69  144.79
   0  -4  -7 1127.19  131.29
   0  -4  -7  902.74  156.45
   0  -4  -7  846.28  156.29
   0  -4  -7 1072.35  169.64
   0   4  -8   46.24   28.59
   0  -4  -8   16.01   16.20
   0  -4  -8    1.98   30.70
   0  -4  -8   57.06   29.06
   0   4  -9  191.58   52.03
   0  -4  -9  268.48   86.66
   0  -4  -9  203.25   63.97
   0  -4  -9  380.59   93.03
   0   4 -10  499.13   54.33
   0  -4 -10  446.65   68.70
   0  -4 -10  471.89   89.50
   0   4 -11  102.32   42.61
   0  -4 -11  153.64   42.22
   0  -4 -12   50.57   35.69
   0   6   0  418.99   49.69
   0   6   0  250.79   39.54
   0  -6   0  324.25   41.77
   0  -6   0  420.26   66.57
   0   6   1  280.91   23.34
   0   6  -1  264.10   29.80
   0   6   1  367.11   42.72
   0   6  -1  325.78   51.97
   0  -6  -1  412.83   50.30
   0  -6   1  432.10   79.19
   0  -6  -1  377.42   56.01
   0  -6   1  386.07   45.92
   0   6   267275.97 3724.68
   0   6  -259889.07 3317.81
   0   6  -256200.46 3125.46
   0   6   258323.74 3229.46
   0  -6   257756.75 3199.68
   0  -6  -261628.60 3411.11
   0  -6  -258389.81 3232.79
   0  -6   254635.36 3040.72
   0  -6  -312957.71  315.81
   0  -6   314899.78  413.28
   0   6   4 8137.87  302.95
   0   6  -4 8117.06  307.84
   0   6  -4 8546.99  285.03
   0  -6   4 7730.74  256.08
   0  -6   4 8433.74  323.19
   0  -6  -4 8242.76  272.02
   0  -6  -4 8512.70  279.78
   0   6  -5   49.25   50.71
   0   6   5   49.76   38.48
   0   6  -5  236.57   76.71
   0   6  -5   25.25   22.35
   0  -6  -5  110.94   44.40
   0  -6   5   81.93   46.49
   0  -6  -5   11.43   12.42
   0  -6  -5   -3.25   12.82
   0   6  -6 2636.85  428.92
   0   6  -6 2996.88  127.40
   0   6  -6 2899.29  165.70
   0  -6  -6 3314.25  131.79
   0  -6  -6 2907.88  162.02
   0  -6   6 3178.67  182.30
   0  -6  -6 3014.15  126.02
   0   6  -7   47.03   34.78
   0   6  -7   29.23   14.05
   0  -6  -7   39.52   19.58
   0  -6  -7   74.01   21.40
   0  -6   7  -50.36   73.88
   0  -6  -7  116.59   39.94
   0   6  -8 6892.72  512.62
   0  -6  -8 6839.26  504.69
   0  -6  -8 6179.60  481.71
   0  -6  -8 7069.54  524.81
   0   6  -9  911.94  171.85
   0  -6  -9  237.72   94.34
   0  -6  -9 1028.32  212.53
   0  -6  -9  790.54  207.61
   0   6 -10 2997.50  332.86
   0  -6 -10 3044.95  348.01
   0   6 -11   39.40   32.80
   0  -6 -11   32.63   36.96
   0   6 -12  733.47  119.02
   0   6 -12 1166.51  202.74
   0  -8   0 5118.50  132.01
   0   8   1  470.84   48.97
   0   8  -1  553.71   57.80
   0   8   1  511.41   64.79
   0   8  -1  548.53   64.23
   0  -8  -1  473.51   39.51
   0  -8   1  466.21  109.35
   0  -8  -1  456.06   61.50
   0  -8   1  487.89   43.00
   0   8   2  133.88   16.53
   0   8  -2   46.37   39.38
   0   8  -2  115.21   23.03
   0   8   2  117.66   22.80
   0  -8   2  223.57   77.73
   0  -8  -2  140.64   21.54
   0  -8  -2  156.96   24.76
   0  -8   2  134.33   25.04
   0   8   3 6263.26  161.52
   0   8  -3 5745.39  164.74
   0   8  -3 6081.86  202.70
   0  -8  -3 6046.72  149.88
   0  -8   3 5591.78  200.50
   0  -8  -3 5738.85  147.01
   0  -8   3 5649.38  150.92
   0   8   4  789.07  102.29
   0   8  -4  800.21   88.56
   0   8  -4  779.14   55.04
   0  -8   4  866.35   82.03
   0  -8   4  790.63  108.54
   0  -8  -4  732.91   45.01
   0  -8  -4  904.62   88.87
   0   8   5 3065.81  233.22
   0   8  -5 2887.96  165.80
   0   8  -5 2946.18  126.33
   0  -8   5 2682.60  112.11
   0  -8   5 2939.79  261.73
   0  -8  -5 3818.99  150.90
   0  -8  -5 3024.29  126.40
   0   8  -6   95.20   41.48
   0   8  -6  191.61   39.85
   0   8  -6  253.15   87.46
   0  -8  -6  153.70   33.75
   0  -8  -6  219.15   41.42
   0  -8   6  220.71   93.62
   0  -8  -6  250.18   76.14
   0  -8  -6  241.30   58.13
   0   8  -7  309.02   47.24
   0  -8  -7  317.93   68.32
   0  -8  -7  329.24   68.22
   0  -8  -7  259.43   70.01
   0  -8   7  451.24  108.36
   0  -8  -7  376.45   52.91
   0   8  -8   44.35   30.84
   0  -8  -8    5.63   11.87
   0  -8  -8   80.58   38.09
   0  -8   8   74.51  103.68
   0  -8  -8   32.21   17.65
   0   8  -9  500.98  106.43
   0  -8  -9  453.85   87.02
   0  -8  -9  403.70   80.63
   0   8 -10  103.67   39.95
   0  -8 -10   52.45   23.53
   0   8 -11  555.01  102.31
   0  10   0  652.56   72.04
   0  10   0  375.40   54.06
   0 -10   0  477.49   75.81
   0 -10   0  513.87   78.41
   0  10   114955.23  369.13
   0  10  -115471.91  384.73
   0  10  -116503.16  435.97
   0 -10   116087.50  399.28
   0 -10  -115477.10  380.67
   0 -10   113175.68  361.57
   0  10   2 5970.78  150.04
   0  10  -2 5168.57  140.18
   0  10   2 5615.85  143.58
   0  10  -2 4708.71  156.78
   0 -10   2 6021.91  214.06
   0 -10   2 4801.00  131.74
   0 -10  -2 5798.11  146.58
   0  10   314361.00  464.09
   0  10  -310065.46  357.38
   0  10  -312144.80  399.66
   0  10   312879.88  417.19
   0 -10   313032.33  476.17
   0 -10  -312529.93  402.49
   0 -10  -312836.47  414.66
   0 -10   312943.92  424.49
   0  10   416967.21  561.11
   0  10  -415810.82  560.22
   0  10  -414058.99  463.45
   0  10   415492.72  505.46
   0 -10   414540.21  527.22
   0 -10  -415363.60  494.85
   0 -10  -415459.13  502.13
   0 -10   414991.67  492.61
   0  10   5 5689.26  272.32
   0  10  -5 5346.74  258.01
   0  10  -5 4582.55  202.14
   0 -10   5 4819.10  192.99
   0 -10   5 5322.13  262.28
   0 -10  -5 5444.11  206.91
   0 -10  -5 5594.95  220.39
   0  10   6  173.18   39.07
   0  10  -6   64.17   35.59
   0 -10  -6   13.26    7.36
   0 -10   6   83.13   65.13
   0 -10  -6   21.40   15.59
   0  10  -7 4082.28  239.46
   0 -10  -7 3987.11  224.26
   0 -10  -7 4477.49  251.50
   0 -10  -7 4523.16  303.43
   0 -10   7 4794.22  332.91
   0 -10  -7 4665.31  266.61
   0  10  -8 2089.19  186.20
   0 -10  -8 1553.78  127.70
   0 -10  -8 1888.97  155.51
   0 -10   8 1622.47  562.47
   0 -10  -8 1192.80  357.60
   0 -10  -8 1843.90  166.91
   0  10  -9 3449.83  557.85
   0 -10  -9 3276.22  526.15
   0 -10   9 3375.66  580.04
   0 -10  -9 3946.50  635.71
   0  10 -10 2240.14  230.20
   0 -10 -10 1736.87  198.01
   0  10 -11 1054.39  171.31
   0 -10 -11  916.94  148.52
   0 -12   016729.83  413.75
   0 -12   018766.91  529.97
   0  12   1 6239.07  160.06
   0  12  -1 6632.26  174.86
   0  12  -1 6245.86  195.70
   0 -12   1 6440.11  169.57
   0 -12  -1 6392.04  164.90
   0 -12   1 6047.84  201.74
   0  12   210811.67  350.01
   0  12  -210101.46  361.67
   0  12  -210491.42  347.60
   0  12   211204.35  364.04
   0 -12   210501.86  397.54
   0 -12  -210746.78  348.82
   0 -12  -211566.46  379.94
   0 -12   210899.24  359.66
   0  12   310547.99  340.73
   0  12  -310623.02  384.20
   0  12  -311378.85  376.62
   0  12   312220.13  397.05
   0 -12   311590.99  433.97
   0 -12  -311749.50  379.62
   0 -12  -311417.98  370.59
   0 -12   312698.26  418.34
   0  12   4 4498.41  176.41
   0  12  -4 5572.02  418.56
   0  12  -4 5426.15  218.38
   0  12   4 6377.42  247.31
   0 -12   4 6444.26  321.82
   0 -12  -4 5722.20  217.74
   0 -12  -4 5838.28  226.02
   0 -12   4 5936.41  236.03
   0  12   5 2672.44  222.29
   0  12  -5 2802.73  357.63
   0  12  -5 2544.29  113.48
   0  12   5 2558.46  110.71
   0 -12   5 2593.11  173.53
   0 -12  -5 2781.74  109.24
   0 -12  -5 2931.89  119.98
   0 -12   5 2714.80  118.31
   0  12   6 4861.54  302.02
   0  12  -6 4616.90  246.17
   0 -12  -6 4983.49  253.32
   0 -12   6 4717.89  404.58
   0 -12  -6 5039.84  261.87
   0  12  -7 1278.00  193.05
   0 -12  -7 1319.68  194.78
   0 -12  -7 1378.30  223.02
   0 -12   7 1175.52  306.00
   0 -12  -7 1410.85  237.01
   0  12  -8 1825.66  227.52
   0 -12  -8 1861.42  222.66
   0 -12   8 1777.06  360.98
   0 -12  -8 1890.06  242.58
   0  12  -9  182.66   57.31
   0 -12  -9  178.29   41.96
   0 -12   9  237.55   98.87
   0 -12  -9  106.34   22.68
   0  12 -10  848.93   71.46
   0 -12 -10  857.57   98.74
   0  12 -11  148.72   66.19
   0 -12 -11    7.92   20.03
   0  14   0 3654.00  138.96
   0  14   0 2702.32  113.85
   0 -14   0 3440.59  122.63
   0 -14   0 3490.98  190.83
   0  14   1    9.06    9.50
   0  14  -1   31.21   12.13
   0  14   1   45.44   14.19
   0  14  -1   20.13   39.90
   0 -14  -1   41.67   49.38
   0 -14   1  138.95   65.79
   0 -14   1   37.44   18.53
   0  14   2  857.50   58.80
   0  14  -2  920.08   81.32
   0  14   2  949.44   91.63
   0  14  -2  958.32  170.56
   0 -14  -2  853.64   55.07
   0 -14   2  653.39   94.34
   0 -14  -2  816.20   83.03
   0 -14   2  949.14  117.44
   0  14   3 3798.88  128.41
   0  14  -3 3503.21  158.88
   0  14  -3 3191.39  120.81
   0  14   3 3961.03  136.86
   0 -14   3 3571.52  190.68
   0 -14  -3 4006.04  137.26
   0 -14  -3 4484.96  171.04
   0 -14   3 3944.74  143.38
   0  14   4   52.44   15.25
   0  14  -4   -8.64   27.66
   0  14   4   11.83   11.35
   0  14  -4   -2.47   50.63
   0 -14  -4   17.92   11.40
   0 -14   4  130.37  109.87
   0 -14  -4   27.50    7.48
   0 -14   4   21.69   20.43
   0  14   5  246.89   58.69
   0  14   5  225.40   35.49
   0  14  -5  309.68   62.34
   0 -14   5  526.53  126.06
   0 -14  -5  257.03   47.60
   0 -14  -5  295.65   43.60
   0  14   6 1441.64  203.63
   0  14  -6 1543.58  238.09
   0 -14  -6 1416.24  161.11
   0 -14   6 1955.51  208.25
   0 -14  -6 1511.28  209.96
   0  14  -7  600.19   98.16
   0 -14  -7  550.07   94.20
   0 -14   7  539.03  168.00
   0  14  -8  218.51   73.30
   0 -14  -8  240.99   58.63
   0 -14   8  465.16  152.39
   0 -14  -8  183.81   83.03
   0 -14  -8  268.59   74.35
   0  14  -9  309.88   45.25
   0 -14   9  237.68  116.92
   0 -14  -9  198.77   39.17
   0  14 -10   53.59   37.21
   0 -14  10   46.58  109.82
   0 -14 -10   81.60   29.96
   0  14 -11  104.69   41.31
   0  16   028819.84 2325.46
   0  16   021938.39  717.44
   0 -16   025881.56 2102.55
   0 -16   025856.06  838.56
   0  16   1 4129.14  143.44
   0  16  -1 5392.28  278.98
   0  16  -1 4385.79  157.48
   0  16   1 5155.50  188.21
   0 -16  -1 5171.04  219.31
   0 -16  -1 3958.94  139.10
   0 -16   1 3522.64  168.31
   0 -16   1 4157.11  148.92
   0  16   210927.88  357.18
   0  16  -211142.68  372.15
   0  16   211101.89  364.61
   0  16  -212606.62  451.74
   0 -16   212096.00  461.32
   0 -16   210978.80  366.51
   0 -16  -210628.03  349.14
   0  16   3 6730.40  257.97
   0  16  -3 6560.21  261.58
   0  16   3 7411.11  285.45
   0  16  -3 7157.51  342.40
   0 -16  -3 6933.39  266.17
   0 -16   3 6755.45  326.32
   0 -16  -3 6703.19  269.41
   0 -16   3 7241.60  284.88
   0  16   412848.53  493.09
   0  16  -410398.32  409.08
   0  16   410081.07  391.70
   0 -16  -410698.73  409.56
   0 -16  -413490.03  519.91
   0 -16   4 9994.77  451.94
   0  16   5 7920.99  415.14
   0  16  -5 5210.95  278.83
   0 -16  -5 5855.62  298.66
   0 -16   5 5688.38  350.11
   0 -16  -5 5398.40  278.84
   0  16   6 5463.10  313.24
   0  16  -6 9365.33  532.27
   0 -16   6 9459.63  588.68
   0 -16  -6 9643.67  538.97
   0  16   7 2068.03  279.22
   0  16  -7 2713.83  245.82
   0 -16  -7 2491.10  203.92
   0 -16   7 2189.21  545.43
   0 -16  -7 2636.79  220.52
   0  16  -8 1720.47  178.42
   0 -16  -8 1446.40  137.16
   0 -16   8 1340.06  346.78
   0  16  -9 1501.71  165.93
   0 -16   9  719.12  292.75
   0 -16  -9 1389.60  171.85
   0  16 -10 2500.39  472.67
   0 -16  10 1840.18  394.55
   0  16 -11  502.08  133.12
   0  18   0 2127.34   93.21
   0  18   0 1877.30  129.55
   0 -18   0 1847.74  224.69
   0 -18   0 2047.32   91.37
   0  18   1   43.84   15.28
   0  18  -1   59.32   17.92
   0  18  -1  -26.34   24.49
   0  18   1   24.12   16.05
   0 -18  -1   40.14   18.52
   0 -18  -1  -69.17   58.94
   0 -18   1  164.98   83.46
   0 -18   1   -1.06   16.95
   0  18   2  869.82   80.54
   0  18  -2  832.29   79.83
   0  18  -2 1164.74  124.99
   0  18   2  747.50   77.57
   0 -18   2  989.19  139.79
   0 -18  -2 1196.75  188.18
   0 -18  -2  889.58   78.09
   0 -18   2  795.25   74.31
   0  18   3 5569.37  216.70
   0  18  -3 6490.42  263.50
   0  18   3 6836.72  266.90
   0 -18  -3 6232.93  243.19
   0 -18  -3 4996.68  205.22
   0 -18   3 6538.52  327.51
   0  18   4 1532.39  320.43
   0  18  -4 1958.88  125.60
   0 -18  -4 1825.87  107.87
   0 -18   4 1845.60  198.51
   0 -18  -4 2034.93  165.28
   0  18   5    7.35    7.34
   0  18   5   24.99   19.58
   0  18  -5   63.70   41.60
   0 -18   5  163.12  105.04
   0 -18  -5   68.60   24.60
   0 -18  -5   57.72   19.07
   0  18   6  156.00   38.45
   0  18   6  188.10   47.52
   0  18  -6  313.53   67.18
   0 -18   6  306.82  100.89
   0 -18  -6  317.31   60.32
   0 -18  -6  294.82   46.58
   0  18  -7   98.22   43.53
   0 -18  -7   91.21   10.49
   0 -18   7  212.58  116.45
   0 -18  -7  102.24   19.49
   0  18  -8  467.62   86.60
   0 -18   8  530.94  142.16
   0 -18  -8  532.96   80.84
   0  18  -9  122.02   42.00
   0 -18   9   19.26   57.74
   0 -18  -9   29.16   13.67
   0  18 -10   25.39   38.21
   0  20   0 3408.15  142.66
   0  20   0 3171.87  138.74
   0 -20   0 3040.69  172.39
   0 -20   0 3431.20  157.52
   0  20   1 1683.67   76.60
   0  20  -1 1689.25   81.77
   0  20   1 2183.91  189.44
   0  20  -1 1245.43  175.63
   0 -20   1 2367.09  420.59
   0 -20  -1 1235.53  333.93
   0 -20   1 1671.76   80.50
   0 -20  -1 1706.37   81.72
   0  20   2  780.24  131.17
   0  20   2  519.74   90.58
   0  20  -2 1006.27  186.37
   0 -20   2  633.03  139.76
   0 -20  -2  664.46  112.71
   0 -20  -2  521.10   81.59
   0  20   3  982.64  119.65
   0  20   3 1080.00  132.15
   0  20  -3 1037.30  131.95
   0 -20   3 1251.41  196.61
   0 -20  -3  722.38  136.39
   0 -20  -3  952.88  118.25
   0  20   4  220.09   59.91
   0  20  -4  293.92   57.30
   0  20   4  311.48   41.46
   0 -20  -4  337.92   52.82
   0 -20  -4  213.25   56.50
   0 -20   4  468.85  152.24
   0  20   5 1344.98  221.69
   0  20  -5 1841.80  150.95
   0  20   5 1292.83  224.18
   0 -20  -5 1439.43  213.60
   0 -20  -5 1531.57  230.15
   0 -20   5 1407.32  530.09
   0  20   6  545.93  103.70
   0  20  -6  764.59  130.67
   0  20   6  470.63   70.31
   0 -20  -6  479.17   80.60
   0 -20  -6 1096.13  168.84
   0 -20   6  439.88  133.15
   0  20   7   32.64   20.20
   0  20  -7   -1.36   37.63
   0 -20   7  346.98  131.57
   0 -20  -7   61.28   26.42
   0  20  -8  163.52   58.49
   0 -20   8  105.71   60.48
   0 -20  -8   53.13   20.18
   0  20  -9  669.16   65.21
   0 -20   9  570.06  227.47
   0  20 -10  123.36   64.71
   0 -20  10  100.70   63.82
   0  22   0 5707.41  336.08
   0  22   0 5236.97  385.41
   0 -22   0 5330.20  336.47
   0 -22   0 5547.04  318.18
   0  22   1 6034.70  344.03
   0  22  -1 6246.31  362.55
   0  22   1 7602.18  435.81
   0 -22  -1 6004.11  380.01
   0 -22   1 5803.08  386.16
   0  22   211078.04  564.34
   0  22  -211758.07  605.06
   0  22   2 9975.45  515.38
   0 -22  -211422.59  582.90
   0 -22  -212107.12  652.90
   0 -22   211454.99  643.89
   0  22   3    8.48    8.46
   0  22  -3  175.81   73.03
   0  22   3   43.48   21.88
   0 -22  -3    2.76   14.69
   0 -22  -3  137.02   61.54
   0 -22   3  -10.86   85.54
   0  22   4 3181.91  249.61
   0  22  -4 4010.13  307.26
   0 -22  -4 3356.02  256.83
   0 -22   4 3224.50  297.91
   0 -22  -4 2325.89  182.76
   0  22   5 1450.84  110.00
   0  22   5 1088.29  171.38
   0  22  -5 1625.32  148.88
   0 -22   5 1379.12  231.95
   0 -22  -5 1145.11  184.18
   0 -22  -5 1132.39  140.53
   0  22   6 3753.44  394.90
   0  22  -6 3148.16  312.88
   0 -22  -6 2796.51  264.98
   0 -22   6 2643.30  319.29
   0 -22  -6 3496.53  339.11
   0  22  -7 3261.95  531.53
   0 -22   7 2801.49  500.71
   0 -22  -7 3770.27  617.88
   0  22  -8 5011.81  504.66
   0 -22   8 4447.63  605.48
   0 -22  -8 5895.65  116.58
   0  22  -9  -76.55   42.32
   0 -22   9  140.42  149.02
   0  22 -10  343.58  202.85
   0 -22  10  712.94  252.11
   0  24   0  100.86   34.58
   0 -24   0   92.62   67.52
   0  24   1  778.13  111.28
   0  24  -1  553.63   93.84
   0  24   1  796.83  118.83
   0 -24  -1  389.22   83.21
   0 -24  -1  398.75   81.96
   0 -24   1  669.35  145.43
   0  24   2  992.62  140.88
   0  24  -2 1144.69  144.34
   0 -24  -2  861.24  107.46
   0 -24   2 1041.96  164.13
   0 -24  -2 1075.40  215.21
   0  24   3  661.68  110.85
   0  24  -3  806.23  150.50
   0  24   3  442.32  111.04
   0 -24  -3  404.21   93.97
   0 -24  -3  783.75  171.19
   0 -24   3  953.66  201.54
   0  24   4 1084.81  130.94
   0  24  -4 1442.65   65.34
   0  24   4  959.63  145.69
   0 -24  -4 1226.82  142.43
   0 -24  -4 1456.14  372.71
   0 -24   4 1297.06  235.40
   0  24   5  194.09   42.90
   0  24  -5  135.79   44.60
   0  24   5   44.61   17.72
   0 -24  -5  105.94   28.52
   0 -24  -5   52.26   23.34
   0 -24   5   75.77  122.91
   0  24   6   10.24    6.36
   0  24  -6   45.85   37.04
   0 -24   6    3.35  102.13
   0 -24  -6    9.78   18.69
   0  24  -7  129.51   60.02
   0 -24   7  119.41   80.93
   0  24  -8   91.33   56.64
   0  24  -9  146.71   37.63
   0 -24   9  171.08   70.60
   0  26   0  161.86   32.53
   0 -26   0  177.34   81.17
   0  26   1 6630.76  492.47
   0  26  -1 6439.12  480.50
   0 -26   1 7623.05  619.69
   0 -26  -1 5794.04  464.92
   0  26   2   82.38   22.40
   0  26  -2   95.57   26.43
   0 -26  -2   18.01   21.87
   0 -26   2  160.66  101.04
   0 -26  -2  170.45   65.91
   0  26   3 5609.05  455.14
   0  26  -3 6500.41  533.70
   0 -26   3 6538.20  591.36
   0 -26  -3 6023.65  518.27
   0  26   4  803.74  145.33
   0  26  -4 1039.40  137.90
   0 -26  -4  354.20  118.53
   0 -26   4  637.08  187.95
   0 -26  -4  978.60  183.82
   0  26   5 2613.94  433.57
   0  26  -5 2643.24  431.90
   0 -26   5 3074.29  533.62
   0 -26  -5 3301.02  589.22
   0  26  -6  -46.01   37.85
   0 -26   6  195.63  152.78
   0  26  -7 2093.18  329.65
   0 -26   7 1063.66  362.37
   0  26  -8  244.17   84.54
   0 -26   8  163.47  142.31
   0  26  -9 1266.62  200.28
   0 -26   9  511.33  285.80
   0  28   0 3905.54  331.30
   0 -28   0 3556.21  886.75
   0  28   1 1932.01  235.18
   0  28  -1 1692.39  223.18
   0 -28   1 1223.90  210.49
   0 -28  -1 1598.89  227.29
   0  28  -2 1697.57  210.86
   0  28   2 1844.25  238.84
   0 -28   2 1692.87  257.12
   0 -28  -2 1630.79  233.22
   0  28   3 1579.57  185.92
   0  28  -3 1525.75  165.83
   0 -28   3 1891.11  251.64
   0 -28  -3  963.16  324.63
   0  28   4 1727.65  292.30
   0  28  -4 2012.08  329.71
   0 -28   4 1912.00  359.81
   0 -28  -4 1678.62  466.51
   0  28   5  167.01   51.21
   0  28  -5  312.38   59.69
   0 -28   5  243.33  108.83
   0 -28  -5  278.28   89.44
   0  28  -6 2469.80  255.07
   0 -28   6 2415.93  318.56
   0 -28  -6 2060.18  439.70
   0  28  -7  -29.67   42.44
   0 -28   7   41.95  120.94
   0  28  -8 1654.20  218.81
   0 -28   8  822.26  312.11
   0  30   0 1263.47  129.38
   0 -30   0 1189.08  282.27
   0  30  -1  159.29   47.45
   0  30   1   60.78   19.57
   0 -30   1  116.04  110.87
   0 -30  -1  185.72  107.26
   0  30  -2   94.61   32.59
   0  30   2  125.83   36.93
   0 -30   2  211.45  113.01
   0 -30  -2  208.89   91.11
   0  30   3  356.42   64.55
   0  30  -3  369.02   80.35
   0 -30   3  284.64  116.36
   0 -30  -3  104.90   58.82
   0  30   4  301.79   44.56
   0  30  -4  630.83   91.35
   0 -30   4  638.14  175.43
   0 -30  -4  189.65   56.21
   0  30  -5   59.07   37.85
   0 -30   5  160.91  130.21
   0 -30  -5  -52.45   57.80
   0  30  -6  855.85  181.81
   0 -30   6  848.70  249.98
   0  30  -7   63.57   43.04
   0 -30   7  350.81  152.19
   0  30  -8   45.97   33.01
   0 -30   8   -0.27  145.81
   0  32   0 1115.70  174.21
   0 -32   0 1115.13  186.05
   0  32   1 2984.29  329.62
   0  32  -1 2763.48  307.00
   0 -32   1 2501.54  334.92
   0 -32  -1 2359.31  702.23
   0  32  -2  176.61   43.04
   0  32   2   38.06   24.60
   0 -32   2  297.76  139.31
   0 -32  -2  381.91  120.30
   0  32   3 5789.04   84.35
   0  32  -3 5434.18  539.06
   0 -32   3 5237.39  625.04
   0  32   4  535.31  131.85
   0  32  -4  747.80  168.59
   0 -32   4  882.39  176.87
   0  32  -5 1548.38  343.63
   0 -32   5  556.68  335.85
   0 -32  -5  676.16  266.84
   0  32  -6  557.88  135.38
   0 -32   6  444.78  221.09
   0  32  -7 1477.60  231.03
   0 -32   7  474.83  362.09
   0  34   0 2013.92  206.76
   0 -34   0 1139.69  193.24
   0  34  -1   83.61   22.22
   0  34   1   50.46   24.39
   0 -34   1  206.73  144.48
   0 -34  -1   94.90   66.50
   0  34   2  168.99   89.53
   0  34  -2  396.65  105.24
   0 -34   2  390.06  175.95
   0 -34  -2  479.25  116.43
   0  34   3   76.49   25.36
   0  34  -3   -7.23   29.31
   0 -34   3   31.23  112.42
   0 -34  -3  110.04  110.36
   0  34  -4   43.32   33.66
   0 -34   4  442.90  207.10
   0 -34  -4   38.07   74.59
   0  34  -5  102.23   35.47
   0 -34   5   58.62  109.44
   0 -34  -5  125.06   67.84
   0  34  -6  453.38  161.16
   0 -34   6  793.75  233.79
   0  36   0   51.59   22.84
   0 -36   0  169.71  113.88
   0  36  -1   39.08   15.28
   0  36   1   51.20   15.56
   0 -36   1  104.02   99.04
   0  36   2  109.82   34.36
   0  36  -2  114.61   36.94
   0 -36   2  162.29  113.85
   0 -36  -2  125.08   96.70
   0 -36   3  272.47  122.29
   0 -36  -3   84.30   48.15
   0  36  -4  120.81   40.67
   0 -36   4   82.61  100.34
   0 -36  -4  166.36   67.49
   0  36  -5   26.93   35.10
   0 -36   5  236.20  134.94
   0  38   0  112.73   31.92
   0 -38   0  310.87  189.42
   0  38  -1 1835.33  238.26
   0  38   1 1777.30  224.77
   0 -38  -1 1470.45  243.28
   0 -38   1  863.31  309.09
   0  38   2  168.89  121.32
   0  38  -2  182.25   82.08
   0 -38   2  179.93  111.85
   0 -38  -2  338.77  153.83
   0  38  -3 1317.70  230.08
   0 -38  -3 1505.74  332.23
   1   1 -12   48.39   40.13
   1  -1 -12  104.17   36.92
   1   1 -11   87.08   34.91
   1  -1 -11  185.07   62.82
   1   1 -10  358.16   36.89
   1   1 -10  455.22  102.54
   1  -1 -10  358.90   34.76
   1  -1 -10  458.70  110.65
   1   1  -9  357.80   67.32
   1   1  -9   55.00   15.44
   1   1  -9  272.90   68.07
   1  -1  -9  103.95   38.80
   1  -1  -9  354.28  100.26
   1  -1  -9  295.79   73.48
   1   1  -8  826.07  297.72
   1   1  -8 1907.82  148.74
   1  -1  -8  700.10  227.71
   1  -1  -8 1727.89  134.10
   1  -1  -8 2108.24  206.06
   1   1  -7  168.84   80.87
   1   1  -7  135.50   50.10
   1   1  -7   66.82   23.07
   1  -1  -7   78.54   30.70
   1  -1  -7   98.35   50.88
   1  -1  -7  108.12   53.65
   1  -1  -7   81.12   39.35
   1   1  -6   63.85   42.37
   1   1  -6   15.38   18.04
   1   1  -6   73.68   60.57
   1  -1  -6   69.64   57.33
   1  -1  -6   30.45   14.45
   1  -1  -6   22.53   43.99
   1   1  -5 4366.64  201.32
   1   1  -5 4310.24  147.47
   1   1  -5 5058.37  458.55
   1  -1  -5 4663.26  206.61
   1  -1  -5 4726.77  159.39
   1  -1  -5 4651.79  207.71
   1   1  -4   54.24   12.44
   1   1  -4  214.00   40.18
   1  -1  -4   46.41   37.73
   1  -1  -4   68.42   17.50
   1  -1  -4   66.94   57.40
  -1  -1   4   56.47   11.96
   1   1  -3 1494.84  113.16
  -1   1   3 1427.40  106.35
   1   1  -3 1772.31  249.06
   1  -1  -3 1432.96  107.70
  -1  -1   3 1500.67  112.67
   1   1  -2 4192.74  152.51
   1   1  -2 4198.74  107.54
  -1   1   2 4219.78  105.20
  -1  -1   2 4456.91  115.42
   1  -1  -2 4104.71  103.21
   1  -1  -2 4088.11  108.19
   1   1   2   79.48   28.84
  -1   1  -2  184.24   50.11
   1   1   2   88.68   45.08
  -1   1  -2   60.63   29.76
   1  -1   2   95.04   43.10
   1  -1   2   33.02   18.42
  -1  -1  -2   41.80   23.32
  -1  -1  -2   40.62   21.96
   1   1   3  113.62   51.35
  -1   1  -3  123.95   39.24
   1   1   3  270.96   53.05
  -1   1  -3  138.57   45.90
   1  -1   3  279.87   50.89
   1  -1   3  130.17   60.70
  -1  -1  -3  122.00   31.92
  -1  -1  -3   59.43   26.79
  -1   1  -4 1850.46  215.19
   1   1   4 1765.46  304.21
  -1   1  -4 1590.04  115.68
  -1   1  -4 1506.45   95.35
   1  -1   4 1705.75  125.73
  -1  -1  -4 1481.17  102.25
  -1  -1  -4 1494.86  169.44
  -1   1  -5  489.24   76.01
  -1   1  -5  531.54   52.20
  -1   1  -5  431.17   66.58
  -1  -1  -5  413.51   73.21
  -1  -1  -5  449.28   43.80
  -1  -1  -5  576.56   90.01
   1  -1   5  539.47   89.66
  -1   1  -6   97.09   35.55
  -1   1  -6   -1.86   40.66
  -1   1  -6   31.60   15.33
  -1  -1  -6   25.05   14.75
  -1  -1  -6   18.81   34.16
  -1  -1  -6   21.61   18.46
  -1   1  -7   76.84   28.30
  -1   1  -7  195.84   59.99
  -1   1  -7  116.79   52.30
  -1  -1  -7   47.07   19.16
  -1  -1  -7  192.50   60.75
  -1   1  -8   70.24   26.47
  -1   1  -8   78.25   34.81
  -1  -1  -8   12.70   18.40
  -1  -1  -8   50.76   21.64
  -1   1  -9   44.63   25.34
  -1  -1  -9   61.55   60.35
  -1  -1  -9   53.70   26.41
  -1  -1  -9   39.39   26.18
  -1   1 -10  188.26   29.79
  -1  -1 -10  253.30   36.86
  -1  -1 -10  160.67   54.57
  -1   1 -11   51.65   37.13
  -1  -1 -11   40.16   26.66
  -1   1 -12   63.39   46.53
  -1  -1 -12   89.79   42.70
   1  -3 -12  407.49  105.90
   1   3 -11   38.97   27.26
   1   3 -11   53.47   27.09
   1  -3 -11   39.37   25.34
   1   3 -10 2257.39  254.68
   1   3 -10 2774.55  314.17
   1  -3 -10 2556.77  288.06
   1   3  -9   29.83   18.12
   1  -3  -9   10.52   15.47
   1  -3  -9    1.86   28.91
   1  -3  -9   32.88   28.25
   1   3  -8 2482.13  354.10
   1   3  -8 3107.04  235.35
   1  -3  -8 3052.27  229.35
   1  -3  -8 2674.59  224.14
   1  -3  -8 3281.16  251.28
   1   3  -7  186.28   72.69
   1   3  -7  481.41   62.56
   1  -3  -7  216.52   70.50
   1  -3  -7  354.36   49.44
   1  -3  -7  355.66  104.14
   1  -3  -7  467.59   95.60
   1   3  -6 4171.88  376.72
   1   3  -6 4551.01  223.67
   1   3  -6 4606.17  184.62
   1  -3  -6 4877.98  190.67
   1  -3  -6 4510.98  216.58
   1  -3  -6 3650.48  209.68
   1  -3  -6 4820.50  197.56
   1   3  -5  197.54   38.40
   1   3  -5  304.38   81.53
   1  -3  -5   46.53   16.87
   1  -3  -5  224.98   32.54
   1  -3  -5   69.07   48.81
  -1  -3   5  190.52   32.25
   1  -3  -5  175.80   34.56
   1   3  -4 3438.58  120.26
   1   3  -4 3587.95  170.48
   1  -3  -4 3820.99  145.94
  -1  -3   4 3605.29  124.34
  -1  -3   4 3697.76  172.06
   1  -3  -4 3626.41  120.79
   1  -3  -4 3592.11  128.39
   1   3  -3   72.88   47.43
   1   3  -3   74.70   26.82
  -1  -3   3   32.36   14.63
   1  -3  -3   53.06   12.22
   1  -3  -3   14.15    8.81
  -1  -3   3   76.69   51.39
   1  -3  -3   16.61   15.35
   1   3  -2 9035.86  225.72
  -1   3   2 8918.53  223.19
   1   3  -2 8970.91  257.27
   1  -3  -210307.29  253.83
  -1  -3   2 8259.05  208.01
  -1  -3   2 8510.65  250.31
   1  -3  -2 8658.99  216.59
   1  -3  -2 9117.34  220.69
  -1   3   1  714.55   54.84
   1   3  -1  832.66   63.25
   1   3  -1 1030.00   94.89
  -1   3   1  922.74   69.91
  -1  -3   1  895.65   68.63
  -1  -3   1  979.00  197.77
   1  -3  -1  951.35   72.06
  -1   3  -1  836.15   81.28
   1   3   1 1033.53   80.21
  -1   3  -1 1062.07   90.02
   1  -3   1  845.23   86.24
  -1  -3  -1 1349.86  101.70
   1  -3   1  830.79   75.72
  -1  -3  -1  989.36   72.60
  -1   3  -249384.50 2752.61
   1   3   250911.81 2824.62
  -1   3  -251602.77 2867.26
  -1   3  -246829.37 1136.10
  -1  -3  -250840.49 2818.87
   1  -3   247818.93 1180.21
  -1  -3  -239532.17  959.89
  -1  -3  -249022.58 2714.03
   1   3   3 7578.40  244.20
  -1   3  -3 7097.34  225.33
  -1   3  -3 7151.50  213.75
  -1   3  -3 6907.31  178.17
  -1  -3  -3 6903.70  195.76
   1  -3   3 6654.35  205.39
  -1  -3  -3 8484.17  230.11
  -1   3  -411911.46  551.18
   1   3   410574.94  372.36
  -1   3  -410025.19  357.60
  -1   3  -410300.73  338.53
  -1  -3  -410559.21  365.05
   1  -3   4 9114.28  395.60
  -1  -3  -411993.41  403.92
  -1   3  -5 1463.44  229.52
   1   3   5 1318.89  229.94
  -1   3  -5 1686.66  232.73
  -1   3  -5 1314.25  119.73
  -1  -3  -5 1638.74  205.67
   1  -3   5 1714.41  302.10
  -1  -3  -5 1519.54  155.04
  -1   3  -6 3978.64  318.28
  -1   3  -6 4136.59  169.37
  -1   3  -6 3730.31  194.29
  -1  -3  -6 3984.68  291.46
  -1  -3  -6 3789.85  151.96
   1  -3   6 4061.58  212.06
  -1  -3  -6 4306.39  201.48
  -1   3  -7   48.78   48.50
  -1   3  -7   12.82   26.45
  -1   3  -7   60.73   27.36
  -1  -3  -7   21.72   17.35
  -1  -3  -7  -49.17   37.65
  -1  -3  -7   65.91   31.07
  -1  -3  -7   13.79   19.04
  -1   3  -8 4946.93  371.28
  -1  -3  -8 4828.38  375.28
  -1  -3  -8 4897.80  377.39
  -1   3  -9   94.45   29.44
  -1  -3  -9   27.14   15.85
  -1  -3  -9   18.11   31.74
  -1  -3  -9  153.97   50.77
  -1   3 -10 2990.70  349.41
  -1  -3 -10 3400.95  377.55
  -1   3 -11   12.54   27.65
  -1  -3 -11   85.88   49.95
  -1   3 -12  316.67  153.87
   1   5 -12  108.43   54.06
   1  -5 -12   89.53   39.65
   1   5 -11   36.82   31.42
   1   5 -11   44.91   35.49
   1  -5 -11    8.40   25.62
   1   5 -10  298.47  110.54
   1  -5 -10  208.89   68.72
   1   5  -9    6.74   37.46
   1  -5  -9   48.49   20.38
   1  -5  -9    2.94   18.91
   1  -5  -9   57.25   28.07
   1   5  -8   73.40   29.26
   1  -5  -8   47.16   25.28
   1  -5  -8   47.27   19.12
   1  -5  -8  116.11   33.38
   1   5  -7   46.09   26.98
   1  -5  -7   19.70    7.66
   1  -5  -7    5.94   20.60
   1  -5  -7   73.10   37.81
   1   5  -6  225.92   59.95
   1   5  -6  429.43   79.85
   1   5  -6  396.40   50.46
   1  -5  -6  488.93   75.87
   1  -5  -6  319.04   74.98
   1  -5  -6  289.05   58.60
   1  -5  -6  368.38   46.34
   1   5  -5   96.31   26.92
   1   5  -5   59.67   53.21
   1  -5  -5  140.80   24.56
  -1  -5   5   73.12   16.27
  -1  -5   5  115.56   51.18
   1  -5  -5   82.74   12.76
   1  -5  -5   55.90   16.22
   1   5  -4  107.36   22.23
   1   5  -4   99.40   46.46
   1  -5  -4  197.18   32.46
   1  -5  -4  179.40   25.35
  -1  -5   4  392.97   71.11
  -1  -5   4  171.19   32.57
   1  -5  -4  151.16   35.54
   1   5  -3 1345.54  108.98
  -1   5   3 1506.26  118.73
   1   5  -3 1739.61  221.68
   1  -5  -3 1567.07   88.50
  -1  -5   3 1294.34   99.35
  -1  -5   3 1260.57  303.38
   1  -5  -3 1516.53  120.67
   1  -5  -3 1433.53  105.52
   1   5  -2 2141.51   64.51
   1   5  -2 2177.40  101.07
  -1   5   2 1771.36  102.74
  -1  -5   2 1958.23   60.23
  -1  -5   2 2063.30  109.15
   1  -5  -2 2241.98   64.03
   1   5  -1 1873.10   66.33
  -1   5   1 1587.95   89.60
   1   5  -1 1619.95  108.16
  -1   5   1 1701.60   97.57
  -1  -5   1 1789.80   54.53
   1  -5  -1 1762.87   99.37
  -1  -5   1 1728.38  119.34
   1  -5  -1 1715.04   98.68
  -1   5   0  299.92   27.35
   1   5   0  314.64   51.60
  -1   5   0  296.35   55.44
   1   5   0  239.75   32.39
  -1  -5   0  273.49   47.96
  -1  -5   0  276.52   46.18
   1  -5   0  301.46   59.86
   1  -5   0  247.19   22.44
   1   5   1 1134.15   85.46
  -1   5  -1 1486.76  160.61
  -1   5  -1 1266.42  100.22
   1   5   1 1276.50   94.25
   1  -5   1 1074.68   96.72
  -1  -5  -1 1393.22  103.77
  -1  -5  -1 1056.44   81.47
   1  -5   1 1252.80   95.20
  -1   5  -218556.64  500.04
   1   5   215882.91  392.23
  -1   5  -220226.21  497.10
  -1   5  -216996.90  439.96
   1   5   219379.74  470.65
  -1  -5  -216350.76  398.59
   1  -5   219605.99  515.20
  -1  -5  -219990.70  484.67
  -1   5  -3  157.69   64.40
   1   5   3   85.60   22.80
  -1   5  -3  108.54   54.51
  -1   5  -3   16.75   17.93
  -1  -5  -3   57.92   15.82
   1  -5   3   66.11   57.74
  -1  -5  -3   31.85   11.26
  -1   5  -4  396.63   77.40
   1   5   4  360.45   58.56
  -1   5  -4  604.07   83.74
  -1   5  -4  351.67   32.66
  -1  -5  -4  501.53   90.77
   1  -5   4  433.75   77.30
  -1  -5  -4  350.83   46.14
  -1  -5  -4  431.79   56.07
  -1   5  -5   90.49   63.27
   1   5   5  189.63   58.16
  -1   5  -5    2.65   44.16
  -1   5  -5   27.51   14.99
   1  -5   5   68.79   62.82
  -1  -5  -5   16.46   25.17
  -1  -5  -5   46.78   12.70
  -1  -5  -5   25.06   13.60
  -1   5  -6   72.94   39.99
   1   5   6   92.01   40.15
  -1   5  -6  199.00   73.28
  -1   5  -6  129.00   31.36
  -1  -5  -6   37.72   32.21
   1  -5   6   51.79   53.86
  -1  -5  -6   45.16   22.84
  -1  -5  -6  111.25   22.80
  -1   5  -7  404.47   68.76
  -1  -5  -7  460.97   58.55
  -1  -5  -7  171.82   63.78
   1  -5   7  464.83  103.90
  -1  -5  -7  327.59   80.71
  -1   5  -8  220.07   34.20
  -1  -5  -8  163.01   49.39
  -1  -5  -8   46.51   17.64
  -1  -5  -8   83.62   45.82
  -1  -5  -8  169.21   38.02
  -1   5  -9   44.76   35.77
  -1  -5  -9   48.08   22.23
  -1  -5  -9   50.52   26.92
  -1   5 -10  186.84   45.31
  -1  -5 -10   92.16   32.77
  -1  -5 -10   54.05   36.18
  -1  -5 -11   39.89   19.85
  -1   5 -12   32.63   28.88
  -1   5 -12  113.31   60.20
   1   7 -12  208.45  120.22
   1  -7 -12  302.47  117.71
   1   7 -11  172.73   67.15
   1  -7 -11  189.46   55.50
   1   7 -10  891.92  123.30
   1  -7 -10  841.79  111.59
   1   7  -9  161.13   48.11
   1  -7  -9   88.95   14.73
   1  -7  -9   80.66   27.45
   1   7  -8 1580.16  130.92
   1  -7  -8 1508.19  114.71
   1  -7  -8 1725.94  138.21
   1   7  -7  167.46   71.76
   1   7  -7  238.15   40.62
   1  -7  -7  273.72   38.12
   1  -7  -7  307.05   50.97
   1  -7  -7   60.66   40.19
  -1  -7   7  332.06  111.03
   1  -7  -7  228.12   54.57
   1   7  -6 3451.64  147.76
   1   7  -6 3446.48  196.06
   1  -7  -6 3029.97  122.69
   1  -7  -6 3458.05  137.09
  -1  -7   6 3665.18  317.64
  -1  -7   6 3184.35  131.48
   1  -7  -6 3269.65  137.22
   1   7  -5 1964.01  104.65
   1   7  -5 2414.07  148.59
   1  -7  -5 2226.53   89.54
  -1  -7   5 2059.74   91.12
  -1  -7   5 2511.17  368.86
   1  -7  -5 1888.40   75.33
   1  -7  -5 2067.78  115.24
   1   7  -4 4771.49  164.84
  -1   7   4 4913.77  168.79
   1   7  -4 4980.85  219.44
   1  -7  -4 4788.63  154.20
  -1  -7   4 5309.14  181.24
  -1  -7   4 5495.13  246.85
   1  -7  -4 4565.37  157.10
   1  -7  -4 5034.37  162.43
   1   7  -3  980.96   79.33
  -1   7   3 1218.17   94.16
   1   7  -3 1073.85  250.48
  -1  -7   3 1202.61  195.93
  -1  -7   3 1158.48   90.93
   1  -7  -3 1263.72   93.03
   1  -7  -3 1144.08   89.00
  -1   7   2   69.25    8.39
   1   7  -2  163.95   58.52
   1   7  -2    5.34   22.59
  -1   7   2   18.10    7.30
  -1  -7   2   44.40   61.24
  -1  -7   2   35.12   15.98
   1  -7  -2   52.67   18.42
   1  -7  -2   62.38    9.97
   1   7  -1 8088.58  205.55
  -1   7   1 7519.32  186.25
  -1   7   1 7964.05  198.86
   1   7  -1 8003.93  231.61
  -1  -7   1 7260.37  184.94
   1  -7  -1 7904.20  195.21
  -1  -7   1 7629.20  222.83
   1   7   0 9101.95  225.94
   1   7   0 9218.43  242.67
  -1   7   0 8925.15  226.74
  -1   7   0 9207.49  229.42
  -1  -7   010442.28  282.51
  -1  -7   0 8770.59  218.07
   1  -7   0 9605.01  238.37
  -1   7  -110390.98  260.46
  -1   7  -111725.18  320.67
  -1  -7  -110254.39  252.20
   1  -7   110470.00  262.87
  -1   7  -211461.32  315.88
  -1   7  -212419.87  310.56
   1   7   212098.88  296.06
   1  -7   212137.03  345.85
  -1  -7  -212445.90  305.34
  -1  -7  -211742.44  286.71
   1  -7   211071.41  277.11
  -1   7  -3  243.28   78.40
   1   7   3  212.97   61.81
  -1   7  -3  302.96   67.83
  -1   7  -3  234.33   86.80
  -1  -7  -3  250.54   37.27
   1  -7   3  118.27   60.09
  -1  -7  -3  228.24   31.81
  -1   7  -4 2532.76  193.32
   1   7   4 2622.21  173.15
  -1   7  -4 2457.63   94.05
  -1   7  -4 2769.53  275.10
  -1  -7  -4 3083.85  116.28
   1  -7   4 2479.34  140.39
  -1  -7  -4 2680.76   93.30
  -1   7  -5 5344.67  510.49
   1   7   5 5854.95  272.79
  -1   7  -5 5780.71  265.80
  -1   7  -5 5232.87  223.27
   1  -7   5 5261.04  263.41
  -1  -7  -5 5163.34  256.27
  -1  -7  -5 5465.93  215.47
  -1  -7  -5 5385.76  209.71
   1   7   6  422.65   82.26
  -1   7  -6  353.28  116.92
  -1   7  -6  349.82   79.00
  -1   7  -6  467.62   71.98
   1  -7   6  482.30  138.24
  -1  -7  -6  376.07  105.59
  -1  -7  -6  253.27   49.37
  -1  -7  -6  347.00   54.49
  -1   7  -7 1535.43  184.68
  -1  -7  -7 1439.16  187.02
  -1  -7  -7 1371.05  162.30
   1  -7   7 1731.98  307.38
  -1  -7  -7  987.15  265.40
  -1  -7  -7 1414.32  172.93
  -1   7  -8  837.29  105.37
  -1  -7  -8  697.75  101.64
  -1  -7  -8  359.33   79.74
   1  -7   8  802.32  156.09
  -1  -7  -8  670.15  110.23
  -1  -7  -8  651.48  106.66
  -1   7  -9 3055.84  296.68
  -1  -7  -9 2709.91  259.44
  -1  -7  -9 2777.48  269.98
  -1   7 -10   50.12   31.51
  -1  -7 -10    2.43   10.25
  -1  -7 -10   25.53   19.68
  -1   7 -11  108.38   35.35
  -1  -7 -11   56.32   22.25
   1   9 -11  410.61   96.88
   1  -9 -11  198.02   48.05
   1   9 -10  569.27  124.99
   1  -9 -10  397.65  118.73
   1   9  -9  536.17  109.46
   1  -9  -9  430.36   81.33
   1  -9  -9  378.92   91.94
   1   9  -8 2554.15  217.54
   1  -9  -8 1945.12  158.08
   1  -9  -8 2594.58  221.38
   1   9  -7  104.61   41.61
   1  -9  -7   23.30    7.43
   1  -9  -7   59.91   19.41
   1  -9  -7   33.61   40.41
  -1  -9   7  120.15   71.35
   1  -9  -7   84.10   27.21
   1   9  -6 4549.31  263.88
   1  -9  -6 4557.98  254.79
   1  -9  -6 4620.88  258.70
  -1  -9   6 4499.46  259.81
  -1  -9   6 3885.88  339.71
   1  -9  -6 5071.73  290.64
   1   9  -5  282.39   41.53
   1   9  -5  272.95   61.30
   1  -9  -5  256.10   30.97
   1  -9  -5  232.39   25.48
  -1  -9   5  309.16   72.39
  -1  -9   5  247.61   35.91
   1  -9  -5  209.13   36.28
   1   9  -4 7073.36  282.48
   1   9  -4 7070.20  241.48
  -1   9   4 7269.48  244.95
  -1  -9   4 6348.96  264.96
   1  -9  -4 6859.62  220.93
   1  -9  -4 7587.58  253.24
  -1  -9   4 7057.70  239.61
  -1   9   3  822.45   68.63
   1   9  -3  699.90   53.41
  -1   9   3  696.53   47.55
   1   9  -3  874.72   99.36
   1  -9  -3  740.46   46.18
  -1  -9   3  974.50  121.74
   1  -9  -3  762.73   63.42
  -1  -9   3  771.46  119.57
  -1   9   2 1243.82   92.40
  -1   9   2 1514.03  118.17
   1   9  -2 1341.16  108.64
   1   9  -2 1555.98  117.85
  -1  -9   2 1332.57  103.23
  -1  -9   2 1386.93  138.31
   1  -9  -2 1295.71  100.91
   1  -9  -2 1410.58  107.16
   1   9  -1 2622.46   79.85
  -1   9   1 2505.08   71.06
  -1   9   1 2509.23   77.11
   1   9  -1 2512.03  135.12
  -1  -9   1 2462.20   74.06
  -1  -9   1 2344.42  109.72
   1  -9  -1 2876.19   86.50
   1  -9  -1 2415.87   67.36
   1   9   020718.49  506.75
  -1   9   019944.11  493.72
   1   9   022937.25  579.52
   1  -9   022720.20  555.50
  -1  -9   018944.88  484.18
  -1  -9   022919.45  560.56
   1   9   1   32.97    8.08
  -1   9  -1    6.94   20.77
  -1   9  -1   19.46   37.55
   1   9   1   -9.95   10.49
   1  -9   1   27.61   12.65
  -1  -9  -1   12.85   10.69
   1  -9   1   29.12   51.55
  -1  -9  -1   49.22   29.74
   1   9   2 6107.07  154.65
  -1   9  -2 7038.90  214.65
  -1   9  -2 6685.06  176.44
   1   9   2 6668.96  166.80
   1  -9   2 6657.18  224.35
  -1  -9  -2 6682.92  167.19
  -1  -9  -2 7792.92  198.73
   1  -9   2 6166.27  162.93
   1   9   3  257.17   28.33
  -1   9  -3  294.90   77.96
  -1   9  -3  341.02   77.06
   1   9   3  316.57   25.27
   1  -9   3  136.94   68.11
  -1  -9  -3  371.25   36.49
  -1  -9  -3  326.33   38.88
   1  -9   3  299.95   65.74
  -1   9  -4 9247.01  364.69
   1   9   411266.99  385.26
  -1   9  -411002.16  375.39
  -1   9  -4 9087.83  335.05
  -1  -9  -410064.12  326.99
   1  -9   410769.03  407.63
  -1  -9  -411170.93  363.51
  -1   9  -5   88.26   40.49
   1   9   5   93.88   31.67
  -1   9  -5   11.70   12.88
  -1   9  -5   61.88   52.69
  -1  -9  -5   59.54   13.26
   1  -9   5  184.86  101.10
  -1  -9  -5   54.75   21.15
  -1   9  -6 4146.81  601.65
   1   9   6 5258.55  375.66
  -1   9  -6 4801.00  278.31
  -1  -9  -6 6327.20  358.93
   1  -9   6 4542.35  305.26
  -1  -9  -6 4558.24  279.25
  -1  -9  -6 5159.29  296.01
   1   9   7  231.93   60.31
  -1   9  -7  109.26   44.49
  -1  -9  -7   34.28   14.00
   1  -9   7  107.29   45.84
  -1  -9  -7   51.14   25.85
  -1  -9  -7   55.62   18.29
  -1   9  -8  794.78  115.56
  -1  -9  -8  526.63  107.47
   1  -9   8  612.46  204.48
  -1  -9  -8  480.81   80.96
  -1   9  -9  576.48  147.49
  -1  -9  -9  664.89  119.09
   1  -9   9  797.53  171.19
  -1  -9  -9  570.62   99.47
  -1   9 -10  314.13   61.69
  -1  -9 -10  287.44   54.51
  -1   9 -11  371.96   91.04
  -1  -9 -11  107.69   39.97
   1  11 -11   91.13   40.17
   1 -11 -11   -0.92   19.98
   1  11 -10   69.86   37.74
   1 -11 -10  -11.68   22.66
   1  11  -9  863.06  121.42
   1 -11  -9  964.27  122.49
   1  11  -8 1056.95  139.19
   1 -11  -8 1058.14  119.03
   1 -11  -8 1076.23  120.77
  -1 -11   8 1350.60  198.11
   1 -11  -8 1076.38  161.05
   1  11  -7  134.17   49.51
   1 -11  -7   41.02   10.15
   1 -11  -7   51.80   11.89
  -1 -11   7  183.52  103.77
   1 -11  -7  112.29   28.77
   1  11  -6 1194.29  149.37
   1 -11  -6 1217.66  145.14
   1 -11  -6 1213.35  143.99
  -1 -11   6 1315.09  388.69
   1 -11  -6 1316.00  276.62
   1  11  -5   37.43   66.67
   1  11  -5   65.26   30.67
  -1  11   5   37.87   13.76
  -1 -11   5  -48.76   75.17
   1 -11  -5   27.53    7.38
   1 -11  -5  -18.28   15.14
  -1 -11   5   21.64   19.53
  -1  11   4   -7.19    7.90
   1  11  -4   72.95   65.66
   1  11  -4   29.95   29.40
  -1  11   4   65.95   24.20
  -1 -11   4  127.55   69.24
   1 -11  -4   26.02   11.26
   1 -11  -4  -15.45   14.14
  -1 -11   4   41.61   20.27
  -1  11   3 4104.70  134.16
   1  11  -3 4603.75  164.38
   1  11  -3 4422.27  195.50
  -1  11   3 4523.14  154.57
   1 -11  -3 4335.55  142.25
  -1 -11   3 4261.74  199.22
   1 -11  -3 4347.70  148.32
  -1 -11   3 4768.84  166.48
  -1  11   2   66.51   10.97
   1  11  -2  124.74   47.58
  -1  11   2   42.12   17.33
   1  11  -2   76.10   27.45
  -1 -11   2   55.69   24.40
  -1 -11   2  352.13   98.84
   1 -11  -2   42.98   22.02
   1 -11  -2   80.61   15.48
  -1  11   1 4608.26  121.58
   1  11  -1 3907.14  108.12
  -1  11   1 4407.66  116.68
   1  11  -1 4372.39  144.10
  -1 -11   1 4361.62  119.15
  -1 -11   1 4625.15  180.61
   1 -11  -1 4375.20  128.47
   1 -11  -1 4614.24  120.97
   1  11   0  538.31   50.96
  -1  11   0  534.85   61.55
  -1  11   0  491.98   57.25
   1  11   0  592.77   69.42
  -1 -11   0  510.72   48.00
   1 -11   0  527.22   74.26
  -1 -11   0  496.08   82.58
   1 -11   0  515.91   44.66
   1  11   1 1981.55   57.62
  -1  11  -1 2180.67   69.27
  -1  11  -1 1370.31  131.43
   1  11   1 2204.79   67.47
  -1 -11  -1 2445.06   98.09
  -1 -11  -1 2307.81   68.86
   1 -11   1 2220.94   68.99
   1 -11   1 1925.50  110.30
   1  11   2 4709.12  156.66
  -1  11  -2 4934.27  197.78
  -1  11  -2 4917.15  172.14
   1  11   2 4995.79  164.53
   1 -11   2 4116.77  201.57
  -1 -11  -2 4620.73  153.22
  -1 -11  -2 3962.98  137.19
   1 -11   2 4904.72  169.15
   1  11   3 2892.75  105.48
  -1  11  -3 2074.84  118.78
  -1  11  -3 2462.53   95.68
   1  11   3 2574.11   93.15
   1 -11   3 2640.45   99.78
  -1 -11  -3 2545.72   87.00
   1 -11   3 2487.03  154.18
   1  11   4 1693.12  156.08
  -1  11  -4 2150.61  197.83
  -1  11  -4 2306.97   93.47
   1  11   4 2429.70   95.10
   1 -11   4 1878.30  147.63
  -1 -11  -4 2483.56   85.85
  -1 -11  -4 2362.42   82.61
   1 -11   4 2096.03   82.36
  -1  11  -5  137.67   61.87
   1  11   5  151.84   41.29
  -1  11  -5  230.24   50.22
  -1  11  -5   63.52   45.25
  -1 -11  -5  179.17   24.09
   1 -11   5  342.04  157.88
  -1 -11  -5  145.16   25.81
   1  11   6 1348.06  214.49
  -1  11  -6  887.58  112.66
  -1 -11  -6  928.09  119.79
   1 -11   6 1045.94  246.30
  -1 -11  -6  819.82  110.68
  -1 -11  -6 1029.10  135.17
   1  11   7   88.56   27.11
  -1  11  -7   54.17   33.99
  -1 -11  -7    5.55    6.09
  -1 -11  -7   -3.40   32.51
   1 -11   7  244.59  114.51
  -1 -11  -7   79.48   31.33
  -1  11  -8  144.43   42.25
  -1 -11  -8   48.55   26.33
   1 -11   8  117.84   78.69
  -1 -11  -8   93.44   24.99
  -1  11  -9   99.72   31.54
  -1 -11  -9   41.45   18.01
   1 -11   9  184.46  128.78
  -1 -11  -9   88.82   23.76
  -1 -11 -10  -24.35   16.58
  -1  11 -11  132.05   33.80
   1  13 -11  798.96  124.98
   1 -13 -11  360.72  149.14
   1  13 -10 2329.24  366.92
   1 -13 -10 1962.79  318.72
   1  13  -9  346.23   74.31
  -1 -13   9  407.32  132.85
   1 -13  -9  331.70   75.25
   1  13  -8  239.46   55.81
  -1 -13   8  195.75   89.85
   1 -13  -8   79.19   19.39
   1  13  -7 1582.00  133.53
  -1 -13   7 1318.49  340.48
   1 -13  -7 1599.12  130.44
   1  13  -6 1947.57  116.66
  -1 -13   6 2129.88  498.12
   1 -13  -6 2074.82  130.37
   1  13  -5 2811.25  124.40
  -1  13   5 2720.85  174.39
   1 -13  -5 2615.40  100.84
  -1 -13   5 2647.43  158.33
   1 -13  -5 2608.61  118.22
  -1 -13   5 2918.76  283.38
  -1  13   4 4556.64  176.15
   1  13  -4 5649.06  659.19
   1  13  -4 5449.82  221.66
  -1  13   4 5320.37  209.26
  -1 -13   4 4517.82  240.31
   1 -13  -4 5051.44  192.02
   1 -13  -4 5455.76  212.91
  -1 -13   4 5381.15  215.05
  -1  13   3 2942.37   99.51
   1  13  -3 2921.65  112.07
  -1  13   3 2984.95  123.71
   1  13  -3 2678.95  308.92
   1 -13  -3 2910.04   99.04
  -1 -13   3 3390.97  482.81
   1 -13  -3 2722.43   97.89
  -1 -13   3 2913.57  118.02
  -1  13   2 9605.74  311.59
   1  13  -210697.97  355.68
  -1  13   210223.41  334.46
   1  13  -2 9909.29  356.99
  -1 -13   210057.00  339.84
  -1 -13   2 9876.38  371.44
   1 -13  -211404.63  377.96
   1 -13  -210348.57  336.38
  -1  13   1 5475.05  184.66
   1  13  -1 5118.78  198.78
   1  13  -1 5194.85  178.17
  -1  13   1 4711.95  159.50
   1 -13  -1 5354.06  179.38
  -1 -13   1 4688.14  161.73
  -1 -13   1 5627.72  246.57
   1  13   0 2203.24   82.15
  -1  13   0 2320.31   87.27
  -1  13   0 2199.74   87.70
   1 -13   0 2365.80   87.31
  -1 -13   0 2119.49  108.26
   1 -13   0 2598.79  243.24
  -1 -13   0 2340.39   87.66
   1  13   1 1853.03   68.37
  -1  13  -1 1550.69  152.09
  -1  13  -1 1901.42   74.87
   1  13   1 2183.13   84.56
  -1 -13  -1 2132.82   79.84
   1 -13   1 2224.52  188.97
  -1 -13  -1 2192.86  172.45
   1 -13   1 1999.27  105.20
   1  13   2 4639.05  155.49
  -1  13  -2 4425.67  192.05
  -1  13  -2 4126.60  148.84
   1  13   2 4462.54  151.17
   1 -13   2 4928.13  172.48
  -1 -13  -2 4211.75  142.19
   1 -13   2 4853.50  227.58
   1  13   3 1105.71  112.01
  -1  13  -3 1413.75  183.60
  -1  13  -3 1096.95  102.96
   1  13   3 1209.80  108.20
   1 -13   3 1343.20  154.07
  -1 -13  -3 1280.80  127.57
  -1 -13  -3 1522.04  137.27
   1 -13   3 1083.93  170.14
   1  13   4 5906.36  240.16
  -1  13  -4 6415.15  284.25
  -1  13  -4 6960.60  277.14
   1  13   4 7105.23  273.31
   1 -13   4 6535.93  314.06
  -1 -13  -4 6736.15  256.81
  -1 -13  -4 6513.94  249.97
   1 -13   4 6096.66  240.89
   1  13   5   90.46   34.08
  -1  13  -5  168.19   42.82
  -1 -13  -5  110.02   19.90
   1 -13   5  134.11   99.53
  -1 -13  -5   77.66   13.92
   1  13   6 1748.93  236.85
  -1  13  -6 2277.51  136.43
  -1 -13  -6 2391.96  127.46
   1 -13   6 1663.74  222.19
  -1 -13  -6 2229.42  119.47
   1  13   7 2728.29  358.09
  -1  13  -7 2397.79  188.34
  -1 -13  -7 2744.67  204.20
  -1 -13  -7 1971.00  291.24
   1 -13   7 2777.13  579.15
  -1 -13  -7 2528.37  194.26
  -1  13  -8   74.53   31.41
  -1 -13  -8   21.27   10.99
  -1 -13  -8   27.93   10.77
   1 -13   8  184.32   80.18
  -1 -13  -8    4.95   14.77
  -1 -13  -8   69.53   20.41
  -1  13  -9   24.68   29.65
  -1 -13  -9   62.10   21.50
   1 -13   9   21.80   62.20
  -1 -13  -9    6.47   13.40
  -1  13 -10 2521.38  392.47
   1 -13  10 2602.58  441.65
  -1  13 -11  398.65  125.86
   1  15 -11   96.15   95.27
   1  15 -10  390.19  135.30
   1 -15 -10  298.21  100.91
   1  15  -9  343.88   67.59
  -1 -15   9  269.47  157.01
   1 -15  -9  252.33   72.41
   1  15  -8 1451.57  153.99
  -1 -15   8 1095.31  267.33
   1 -15  -8  962.79  228.52
   1  15  -7  -10.82   36.25
  -1 -15   7  107.47   53.21
   1 -15  -7   30.98   17.22
   1  15  -6 1957.75  127.33
  -1  15   6 1821.32  129.41
   1 -15  -6 2053.48  124.29
  -1 -15   6 2348.77  528.66
  -1  15   5 1272.22  174.53
   1  15  -5 1546.32  107.91
  -1  15   5 1318.39  277.00
   1 -15  -5 1257.99  151.72
   1 -15  -5 1314.87  283.45
  -1 -15   5 1033.43  167.04
  -1  15   4  716.48   90.62
   1  15  -4  631.43   70.78
  -1  15   4  676.57   68.06
   1  15  -4  749.97  112.09
   1 -15  -4  595.81   61.89
  -1 -15   4  713.62  126.86
   1 -15  -4  626.30   93.47
  -1 -15   4  513.12   67.74
  -1  15   3  322.32   43.64
   1  15  -3  444.68   82.54
  -1  15   3  284.03   36.14
   1  15  -3  268.74   59.01
  -1 -15   3  443.13  119.12
   1 -15  -3  523.56   92.51
   1 -15  -3  295.72   44.39
  -1  15   2 3518.99  120.78
   1  15  -2 3892.90  143.10
  -1  15   2 3736.62  134.86
   1  15  -2 3254.35  147.74
  -1 -15   2 3555.26  130.05
  -1 -15   2 3991.25  194.63
   1 -15  -2 3568.71  133.82
   1 -15  -2 3689.03  127.53
   1  15  -1  552.32   70.25
  -1  15   1  619.66   84.23
  -1  15   1  461.08   81.47
   1  15  -1  770.12  128.00
  -1 -15   1  414.57   45.06
  -1 -15   1  347.96   76.77
   1 -15  -1  344.04   80.14
   1 -15  -1  414.27   82.72
   1  15   0  106.33   19.90
  -1  15   0   57.69   22.69
  -1  15   0   88.06   28.16
   1  15   0   67.81   17.29
  -1 -15   0   95.86   23.59
   1 -15   0  177.47   55.62
  -1 -15   0   40.62   49.70
   1 -15   0   96.93   26.84
   1  15   1  377.36   55.05
  -1  15  -1  214.96   41.39
  -1  15  -1  358.69   48.10
   1  15   1  439.67   72.67
  -1 -15  -1  317.43   50.94
   1 -15   1  175.75   60.14
  -1 -15  -1  262.48   54.17
   1 -15   1  315.91   39.20
   1  15   2 7666.42  253.96
  -1  15  -2 7812.82  265.33
  -1  15  -2 9868.41  362.67
   1  15   2 8924.14  293.19
   1 -15   2 9312.83  367.57
  -1 -15  -210529.05  375.43
  -1 -15  -2 8766.08  290.10
   1 -15   2 8658.77  291.98
   1  15   3   20.23   10.66
  -1  15  -3  122.08   74.82
  -1  15  -3   71.59   25.34
   1  15   3   13.20    6.49
   1 -15   3  207.08  118.34
  -1 -15  -3    5.36   11.22
  -1 -15  -3   12.31   10.71
   1 -15   3    2.49   19.84
   1  15   4   24.21   16.62
  -1  15  -4   96.01   40.38
  -1  15  -4  223.17   86.58
   1  15   4   12.51    7.00
  -1 -15  -4   40.93   13.51
   1 -15   4   39.14   56.26
  -1 -15  -4   21.89   13.93
   1  15   5   18.21   28.45
   1  15   5    9.87    9.34
  -1  15  -5  119.74   54.50
   1 -15   5   83.16   60.08
  -1 -15  -5   28.14    8.57
  -1 -15  -5   10.69    7.09
   1  15   6   68.59   33.08
  -1  15  -6   28.88   31.82
  -1 -15  -6   52.94   13.71
   1 -15   6  303.62  137.00
  -1 -15  -6   30.77   13.40
   1  15   7 1135.22  192.63
  -1  15  -7 1069.65  148.27
  -1 -15  -7  820.73  114.97
   1 -15   7  939.23  193.01
  -1 -15  -7  918.20  134.02
  -1 -15  -7  926.80  143.09
   1  15   8 1219.82  129.10
  -1  15  -8 1265.18  138.74
   1 -15   8  743.92  222.48
  -1 -15  -8  527.96  193.68
  -1 -15  -8 1082.95  218.60
  -1  15  -9   43.21   20.03
   1 -15   9   45.66   94.22
  -1  15 -10  132.18   40.23
   1 -15  10  179.57  106.76
  -1  15 -11  133.77   57.23
   1  17 -11  110.06   61.32
   1  17 -10   78.62   33.48
  -1 -17  10  171.71  121.71
   1 -17 -10   12.96   18.56
   1  17  -9  171.68   38.80
  -1 -17   9  335.24  124.43
   1 -17  -9   39.76   16.79
   1  17  -8  679.21  147.08
  -1 -17   8  551.95  217.55
   1 -17  -8  501.42   79.94
   1  17  -7  118.50   59.01
  -1 -17   7  116.25   71.29
   1 -17  -7   77.86   17.39
   1  17  -6  163.12   48.87
  -1  17   6  105.10   39.97
   1 -17  -6   73.76   15.71
   1 -17  -6  207.09   41.77
  -1 -17   6  382.06  118.31
  -1  17   5  336.45   63.11
   1  17  -5  474.82   86.73
   1 -17  -5  287.68   49.79
  -1 -17   5  724.47  140.26
   1 -17  -5  325.52   55.02
  -1  17   4  162.06   27.52
   1  17  -4  347.47   57.79
  -1  17   4  228.48   31.13
   1 -17  -4  205.96   24.14
   1 -17  -4  357.52   71.71
  -1 -17   4  209.19   88.72
  -1  17   3   13.62    8.75
   1  17  -3    5.45   30.03
  -1  17   3   19.57   15.71
   1  17  -3  158.16   66.76
   1 -17  -3   40.49   13.89
  -1 -17   3  231.53  122.55
   1 -17  -3   24.18   16.87
  -1 -17   3   32.30   16.92
  -1  17   2  270.45   39.78
   1  17  -2  284.37   43.74
  -1  17   2  244.56   41.07
   1  17  -2  160.12   44.94
   1 -17  -2  204.90   40.94
  -1 -17   2  291.73  122.41
   1 -17  -2  225.19   44.01
  -1 -17   2  214.40   30.49
   1  17  -1   54.11   31.77
  -1  17   1   38.42   16.60
  -1  17   1  118.23   34.50
   1  17  -1  112.12   57.64
  -1 -17   1   68.99   22.29
   1 -17  -1  188.76   76.98
  -1 -17   1   55.35   39.11
   1 -17  -1   55.26   24.51
   1  17   0  177.79   35.89
   1  17   0  172.43   35.52
  -1  17   0  222.60   35.39
  -1  17   0  216.77   37.91
  -1 -17   0   65.41   31.61
  -1 -17   0  175.91   45.04
   1 -17   0  121.74   39.61
   1 -17   0  151.68   24.86
   1  17   1  850.05   99.85
  -1  17  -1  758.36   70.61
  -1  17  -1  572.02  138.15
   1  17   1  828.88  105.57
   1 -17   1  948.57  208.27
  -1 -17  -1  902.00  171.40
  -1 -17  -1  742.60   70.03
   1 -17   1  757.22   72.91
   1  17   2   64.75   19.29
  -1  17  -2    9.19   23.68
   1  17   2   31.59   10.02
  -1  17  -2  110.14   53.54
  -1 -17  -2   85.65   25.95
   1 -17   2  221.76  103.91
  -1 -17  -2   50.73   37.22
   1 -17   2   99.21   23.36
   1  17   3   24.95   16.21
  -1  17  -3  144.32   42.68
  -1  17  -3   66.18   55.96
   1  17   3   38.21   15.76
  -1 -17  -3   35.88   15.58
   1 -17   3   45.36   88.36
  -1 -17  -3   27.15   25.43
   1  17   4  809.06  134.37
   1  17   4  695.77   99.17
  -1  17  -4  722.80   94.61
   1 -17   4  305.57   86.04
  -1 -17  -4  833.32  141.97
  -1 -17  -4  681.13  108.56
   1  17   5  433.09   67.67
   1  17   5  468.28   79.98
  -1  17  -5  644.30   84.56
   1 -17   5  757.91  148.70
  -1 -17  -5  748.84  121.96
  -1 -17  -5  526.34   87.53
   1  17   6  844.69  156.94
  -1  17  -6  872.13  138.16
  -1 -17  -6  642.72  117.26
   1 -17   6  984.10  196.73
  -1 -17  -6  796.85  144.65
   1  17   7   89.37   35.81
  -1  17  -7  159.96   54.05
  -1 -17  -7   55.42   12.97
   1 -17   7   98.86   83.97
  -1 -17  -7   56.99   18.35
   1  17   8   62.69   22.63
  -1  17  -8   87.40   40.22
   1 -17   8   26.49   58.73
  -1 -17  -8   57.79   21.31
  -1  17  -9   -3.61   35.09
   1 -17   9  -92.92  108.59
  -1  17 -10  255.44   66.25
   1 -17  10  289.29  183.73
  -1  17 -11   17.48   28.68
   1 -17  11  145.86  133.61
   1  19 -10  295.65   81.90
  -1 -19  10  267.82  167.01
   1 -19 -10  167.68   50.13
   1  19  -9 1934.47  307.53
  -1 -19   9  661.01  275.57
   1 -19  -9 1460.36  245.56
   1  19  -8  955.08  225.81
  -1 -19   8  982.82  252.65
   1 -19  -8  901.20  167.30
   1  19  -7 1265.39  151.22
  -1 -19   7 1044.86  397.10
   1 -19  -7  870.79  203.04
   1  19  -6 1865.80  180.27
   1 -19  -6 1407.85  157.67
  -1 -19   6 1298.45  303.44
   1 -19  -6 1471.32  114.05
  -1  19   5   25.25   12.46
   1  19  -5   37.42   31.09
  -1  19   5    6.88   11.93
   1 -19  -5    6.37    7.16
   1 -19  -5   27.99   24.89
  -1 -19   5   44.27   99.85
  -1  19   4 2780.97  154.19
   1  19  -4 3655.83  201.21
  -1  19   4 3210.60  180.38
   1 -19  -4 3188.80  166.69
   1 -19  -4 3436.19  189.90
  -1 -19   4 3957.65  589.89
  -1  19   3 5264.10  298.39
   1  19  -3 6229.86  360.12
   1 -19  -3 5494.48  312.34
  -1 -19   3 5757.38  383.87
   1 -19  -3 4804.08  282.30
  -1  19   2 1104.37  116.85
   1  19  -2 1135.46  149.89
  -1  19   2 1226.96  157.15
   1  19  -2 1380.75  238.47
   1 -19  -2  925.86  126.90
  -1 -19   2 1329.67  213.64
   1 -19  -2  826.09  160.44
  -1 -19   2  990.01  138.22
  -1  19   1 5009.29  199.75
   1  19  -1 4920.74  199.13
   1  19  -1 6396.19  288.18
  -1  19   1 4285.51  172.46
  -1 -19   1 5074.81  345.93
   1 -19  -1 5657.80  287.89
   1 -19  -1 5174.37  208.48
  -1 -19   1 5128.43  207.58
   1  19   0 8332.07  323.83
  -1  19   0 8954.46  348.66
   1  19   0 6657.60  274.67
  -1  19   0 9210.69  361.88
  -1 -19   0 9310.25  414.05
   1 -19   0 8136.41  358.30
  -1 -19   0 7680.80  299.14
   1 -19   0 8620.03  334.86
   1  19   1  759.14   96.84
  -1  19  -1  629.58   69.69
   1  19   1  848.59  106.02
  -1  19  -1  489.73   75.18
  -1 -19  -1  861.29  166.31
   1 -19   1  825.50  179.90
  -1 -19  -1  549.48  108.00
   1 -19   1  634.63   66.75
   1  19   2 6272.25  245.69
  -1  19  -2 5906.30  243.91
   1  19   2 5215.95  205.90
  -1 -19  -2 5836.25  232.57
   1 -19   2 5674.36  229.35
  -1 -19  -2 6577.27  286.05
   1 -19   2 6275.18  311.57
   1  19   3 3101.61  179.39
   1  19   3 3571.93  206.35
  -1  19  -3 3403.34  203.57
   1 -19   3 3334.65  273.16
  -1 -19  -3 3942.80  246.74
  -1 -19  -3 3177.87  184.37
   1  19   4 3665.05  197.52
  -1  19  -4 3009.42  169.88
   1  19   4 2881.71  156.87
  -1 -19  -4 3056.64  161.78
  -1 -19  -4 2222.78  182.41
   1 -19   4 2975.81  369.38
   1  19   5 3703.89  251.20
   1  19   5 4152.53  237.30
  -1  19  -5 4377.40  260.34
   1 -19   5 3587.98  272.92
  -1 -19  -5 3878.82  266.09
  -1 -19  -5 4287.70  243.78
   1  19   6 2521.55  281.23
  -1  19  -6 2237.43  196.64
  -1 -19  -6 2595.69  215.21
   1 -19   6 2625.98  272.41
  -1 -19  -6 2861.36  264.13
   1  19   7  233.64   63.52
  -1  19  -7  440.65   93.56
   1 -19   7  181.51  105.46
  -1 -19  -7  448.41  112.90
  -1  19  -8 2110.73  243.09
   1 -19   8 1742.77  627.13
  -1 -19  -8 2273.47  257.87
  -1  19  -9 1592.15  256.79
   1 -19   9  889.05  391.20
  -1  19 -10 1617.77  221.80
   1 -19  10  996.84  336.70
   1  21 -10  233.57   92.36
  -1 -21  10   42.64  120.97
   1  21  -9  255.64   80.00
  -1 -21   9  257.78  157.05
   1  21  -8   88.26   22.34
  -1 -21   8   91.06   97.61
   1 -21  -8   43.39   12.29
   1  21  -7  144.62   51.14
  -1 -21   7  358.43  114.71
   1 -21  -7   45.43   24.54
  -1  21   6  657.64  130.13
   1  21  -6 1079.74  141.56
  -1 -21   6 1031.27  319.85
   1 -21  -6 1275.61  215.81
  -1  21   5  273.56   58.30
   1  21  -5  329.66   78.64
  -1  21   5  205.54   39.42
   1 -21  -5  224.35   54.82
   1 -21  -5  374.38   74.34
  -1 -21   5  532.37  176.33
  -1  21   4 1320.35  161.26
   1  21  -4 1656.95  115.35
   1 -21  -4 1113.97  133.24
  -1 -21   4 1272.58  214.64
   1 -21  -4 1083.95  186.13
  -1  21   3  287.72   58.68
   1  21  -3  370.27   85.32
  -1  21   3  333.64   54.44
   1 -21  -3  323.65   55.09
   1 -21  -3  246.30   65.91
  -1 -21   3  360.19  120.31
  -1  21   2  104.84   19.34
   1  21  -2  137.51   39.53
  -1  21   2   37.03   14.57
   1 -21  -2   36.80   17.61
   1 -21  -2   83.09   47.26
  -1 -21   2   76.66   57.67
  -1  21   1   35.44   16.31
   1  21  -1   42.46   15.81
   1  21  -1   18.80   13.56
  -1  21   1   33.07   14.36
   1 -21  -1   36.74   27.25
  -1 -21   1   66.08   73.94
   1  21   0 2120.43  134.73
  -1  21   0 2055.91  127.45
   1  21   0 1842.91  158.37
  -1  21   0 2269.61  189.84
  -1 -21   0 1937.22  164.46
   1 -21   0 2197.88  172.68
  -1 -21   0 1695.46  105.22
   1 -21   0 2089.98  128.93
   1  21   1   23.78   15.61
  -1  21  -1   99.37   38.27
   1  21   1   35.17   16.21
  -1 -21  -1   13.48   17.85
   1 -21   1   36.40   23.71
  -1 -21  -1  151.16   87.95
   1 -21   1  230.59   70.77
   1  21   2  169.67   26.21
  -1  21  -2  190.19   44.07
   1  21   2  104.35   18.41
  -1 -21  -2   41.87   25.50
   1 -21   2  270.32  110.59
   1  21   3  179.68   45.48
  -1  21  -3  179.14   70.73
  -1 -21  -3  102.36   29.00
   1 -21   3  339.23  104.74
  -1 -21  -3  178.25   81.23
   1  21   4  273.70   60.30
   1  21   4  236.77   58.98
  -1  21  -4  356.82   62.74
   1 -21   4  363.97  142.05
  -1 -21  -4  566.01  103.04
  -1 -21  -4  331.02   47.02
   1  21   5  190.14   32.16
   1  21   5  146.96   21.31
  -1  21  -5  282.75   54.35
   1 -21   5  188.52  109.58
  -1 -21  -5  124.87   29.36
  -1 -21  -5  206.58   25.73
   1  21   6 1632.88  285.12
  -1  21  -6 1629.91  205.69
   1  21   6 1232.53  185.90
  -1 -21  -6 1514.29  190.11
  -1 -21  -6 1287.13  243.09
   1 -21   6 1641.79  278.68
   1  21   7   88.76   38.79
  -1  21  -7   29.86   31.95
   1 -21   7  114.37  103.69
  -1  21  -8   93.24   62.99
   1 -21   8  170.23   75.80
  -1 -21  -8   39.96   12.98
  -1  21  -9   42.98   44.16
   1 -21   9  222.48  112.24
  -1  21 -10   55.40   46.00
   1 -21  10   70.50   80.67
   1  23 -10  318.17   58.89
  -1 -23  10   94.36  147.03
   1  23  -9 1530.84  246.48
  -1 -23   9  881.59  389.49
   1  23  -8  364.21   97.80
  -1 -23   8  310.86  181.76
   1 -23  -8  342.18   87.20
   1  23  -7  509.89   81.32
  -1 -23   7  352.36  193.45
   1 -23  -7  765.78  136.75
  -1  23   6   12.24    8.72
   1  23  -6   75.40   21.01
  -1 -23   6  251.99  130.88
   1 -23  -6   53.92   19.43
  -1  23   5   42.73   19.67
   1  23  -5  196.68   60.28
   1 -23  -5   31.09   14.29
  -1 -23   5  -10.38  119.27
   1 -23  -5   99.64   40.79
  -1  23   4  183.26   33.30
   1  23  -4   93.51   24.91
   1 -23  -4  101.26   29.49
  -1 -23   4  317.29  102.56
   1 -23  -4  158.92   46.65
  -1  23   3 4652.08  263.58
   1  23  -3 5127.99  304.41
   1 -23  -3 4321.34  248.36
  -1 -23   3 5248.55  361.60
   1 -23  -3 2784.45  184.68
  -1  23   2  132.88   29.02
   1  23  -2  181.64   41.46
  -1  23   2   96.40   30.89
   1 -23  -2  112.28   28.79
   1 -23  -2  384.54   99.79
  -1 -23   2  119.07   58.58
   1  23  -1 4483.39  238.26
  -1  23   1 4169.87  220.36
   1 -23  -1 4057.11  221.82
  -1 -23   1 4730.51  319.02
   1 -23  -1 4244.88  265.14
   1  23   0  390.15   74.94
  -1  23   0  392.85   71.41
   1  23   0  261.20   57.00
   1 -23   0  219.13   66.06
   1 -23   0  258.89   69.16
  -1 -23   0  183.95   68.22
   1  23   1   25.05    9.51
  -1  23  -1   18.60   33.51
   1  23   1   34.57   25.57
  -1 -23  -1   73.73   51.82
   1 -23   1  134.10   62.32
   1  23   2  106.61   30.05
  -1  23  -2  264.89   62.08
  -1 -23  -2   67.88   18.14
   1 -23   2  137.28   74.22
  -1 -23  -2  212.03   81.28
   1  23   3 4334.85  267.46
  -1  23  -3 4597.05  271.95
   1  23   3 4452.80  254.48
  -1 -23  -3 3947.22  228.33
  -1 -23  -3 4544.75  287.23
   1 -23   3 4591.68  329.57
   1  23   4   16.25   10.10
  -1  23  -4  -21.25   34.00
  -1 -23  -4   23.76   15.76
   1 -23   4   24.41   74.75
  -1 -23  -4    1.63   43.66
   1  23   5  961.90  194.99
  -1  23  -5 1105.26  148.92
  -1 -23  -5  926.41  151.71
   1 -23   5 1006.86  164.88
   1  23   6   58.81   42.55
  -1  23  -6   48.49   32.18
   1 -23   6   78.03  108.09
  -1 -23  -6   31.69   14.48
  -1  23  -7  355.15   68.01
   1 -23   7  389.16  139.51
  -1 -23  -7  114.11   30.87
  -1  23  -8   91.61   47.45
   1 -23   8  158.99   63.68
  -1  23  -9  928.76  163.65
   1 -23   9  424.60  185.19
   1  25  -9  403.99   95.83
  -1 -25   9  153.53  144.21
   1  25  -8  109.69   61.29
  -1 -25   8  227.89  130.47
   1 -25  -8   58.67   30.75
   1  25  -7  984.19  180.52
  -1 -25   7 1095.16  210.89
   1 -25  -7  751.77  192.95
   1  25  -6 3213.95  522.72
  -1 -25   6 2796.05  488.24
   1 -25  -6 2135.70  375.99
  -1  25   5  763.63  164.64
   1  25  -5  593.94  121.38
   1 -25  -5  288.88  110.33
  -1 -25   5  791.72  218.76
   1 -25  -5  557.98  161.92
  -1  25   4  998.67  174.67
   1  25  -4 1399.87  261.68
  -1 -25   4 1383.07  227.57
   1 -25  -4  827.00  189.91
   1  25  -3  -25.14   27.70
  -1  25   3   24.84   12.19
   1 -25  -3   11.83   14.12
  -1 -25   3  174.40  108.21
   1 -25  -3  129.16   80.70
   1  25  -2 1400.76  212.02
  -1  25   2 1414.15  244.04
   1 -25  -2  738.12  168.48
  -1 -25   2 1618.28  206.45
   1 -25  -2 1245.04  349.97
  -1  25   1 1969.42  127.75
   1  25  -1 1998.31  124.86
  -1 -25   1 2362.76  204.79
   1 -25  -1 1530.55  350.87
   1  25   0 2014.60  124.21
  -1  25   0 1835.63  114.76
  -1 -25   0 2470.10  207.96
   1 -25   0 1394.07  407.69
   1  25   1 4755.94  274.59
  -1  25  -1 4455.67  260.65
   1 -25   1 3746.95  563.81
  -1 -25  -1 4108.48  274.31
   1  25   2 3641.15  274.33
  -1  25  -2 3557.62  275.48
   1  25   2 3120.07  269.50
  -1 -25  -2 2734.99  398.99
   1 -25   2 3518.39  325.38
   1  25   3   36.90   22.82
   1  25   3   41.35   21.30
  -1  25  -3  -18.29   35.94
   1 -25   3   18.61  113.36
  -1 -25  -3   42.05   27.74
  -1 -25  -3   11.92   17.15
   1  25   4  991.06  178.02
  -1  25  -4 1412.38  179.92
  -1 -25  -4  975.93  175.50
   1 -25   4 1288.24  231.34
  -1 -25  -4 1018.30  256.50
   1  25   5  -20.07   17.22
   1  25   5   20.18   15.65
  -1  25  -5   21.28   37.57
   1 -25   5  494.72  189.86
  -1 -25  -5  198.48   75.89
  -1 -25  -5   26.34   13.88
   1  25   6  813.95  170.34
  -1  25  -6 1999.88  230.39
   1 -25   6 1282.11  316.58
  -1 -25  -6 1791.21  305.54
  -1  25  -7 1312.36  151.22
   1 -25   7  787.36  248.72
  -1 -25  -7  602.45  147.09
  -1  25  -8 1340.48  266.05
   1 -25   8  862.08  308.88
  -1  25  -9  103.61   34.71
   1 -25   9  230.21   86.26
   1  27  -9  119.63   48.87
  -1 -27   9   77.50   71.11
   1  27  -8   45.84   39.03
  -1 -27   8  200.57  120.20
   1  27  -7   37.71   42.96
  -1 -27   7  171.88  120.91
   1  27  -6   78.50   53.94
  -1 -27   6  257.48  115.00
   1 -27  -6   54.64   25.63
  -1  27   5   -2.42   13.80
   1  27  -5   27.61   21.90
  -1 -27   5  125.14  107.48
   1 -27  -5   33.58   12.52
  -1  27   4  387.60  104.23
   1  27  -4  468.97   96.88
   1 -27  -4  139.19   64.47
  -1 -27   4  570.53  170.53
   1 -27  -4  215.76  107.76
   1  27  -3   49.15   31.95
  -1  27   3   16.44   10.35
   1 -27  -3   33.96   26.19
  -1 -27   3  185.45  100.51
   1 -27  -3  222.33   95.72
   1  27  -2  185.06   34.85
  -1  27   2  216.40   41.46
   1 -27  -2  106.24   31.13
  -1 -27   2  482.96  157.14
   1 -27  -2  438.34   96.67
   1  27  -1  310.63   73.22
  -1  27   1  221.66   45.96
  -1 -27   1  126.07  110.16
   1 -27  -1   66.19   84.14
  -1  27   0  260.25   49.76
   1  27   0  215.10   37.69
  -1 -27   0   59.09   93.78
   1 -27   0  176.80   88.33
   1  27   1   46.87   25.43
  -1  27  -1   76.74   41.08
   1 -27   1   66.93   61.22
  -1 -27  -1  176.02  100.83
   1  27   2  -13.01   16.88
  -1  27  -2   61.79   31.93
   1 -27   2  -47.84  101.89
  -1 -27  -2   98.82   67.26
   1  27   3  259.18   56.79
  -1  27  -3  323.38   82.19
   1 -27   3  556.69  180.49
  -1 -27  -3  124.64   44.97
   1  27   4  256.40   80.18
  -1  27  -4  432.88   97.57
   1 -27   4  585.48  159.06
  -1 -27  -4  268.91  104.96
   1  27   5   82.25   41.15
  -1  27  -5   47.11   43.87
   1 -27   5   76.44  101.10
  -1 -27  -5  -13.85   47.42
   1  27   6  105.64   28.47
  -1  27  -6  473.03  122.47
   1 -27   6  414.82  183.86
  -1  27  -7  203.25   64.84
   1 -27   7  438.23  191.66
  -1  27  -8    2.72   48.91
   1 -27   8  224.09  151.98
   1  29  -8   25.23   39.71
  -1 -29   8  150.19   98.48
   1  29  -7  534.36  188.66
  -1 -29   7  182.66  147.79
   1  29  -6  191.47   66.16
  -1 -29   6  531.06  195.91
   1 -29  -6  124.94   29.20
   1  29  -5 1870.67  196.60
  -1 -29   5 1881.46  275.05
   1 -29  -5 2083.53  262.75
  -1  29   4  103.86   27.74
   1  29  -4  129.56   50.50
  -1 -29   4   47.65   98.48
   1 -29  -4  107.33   60.16
  -1  29   3  281.65   53.59
   1  29  -3  396.75  103.28
  -1 -29   3   46.88   96.02
   1 -29  -3  197.29   93.37
   1  29  -2   39.51   27.51
  -1  29   2   10.89    8.55
  -1 -29   2  117.22  133.66
   1 -29  -2  144.94   80.19
   1  29  -1  751.25  200.53
  -1  29   1  720.83  151.79
  -1 -29   1  722.47  189.40
   1 -29  -1  241.34  149.84
   1  29   0 1207.10  197.91
  -1  29   0 1066.86  162.13
  -1 -29   0  916.16  256.86
   1 -29   0  871.59  253.50
  -1  29  -1 4144.46  397.33
  -1 -29  -1 4330.89  587.55
   1 -29   1 4520.60  481.45
   1  29   2   17.40   17.37
  -1  29  -2   44.75   39.24
   1 -29   2  157.81  105.09
  -1 -29  -2  115.44   86.74
   1  29   3 1036.04  177.74
  -1  29  -3 1211.79  156.75
   1 -29   3  982.81  245.35
  -1 -29  -3  776.28  281.73
   1  29   4   24.32    7.72
  -1  29  -4  106.67   37.34
   1 -29   4  109.39  104.41
  -1 -29  -4   29.81   80.19
   1  29   5  917.09  155.33
  -1  29  -5 1005.21  121.38
   1 -29   5  611.64  206.33
   1 -29   6  139.46  117.66
  -1  29  -7  818.16  269.56
   1 -29   7 1405.14  303.58
  -1  29  -8   48.07   46.79
   1 -29   8   88.51   68.78
   1  31  -7   62.59   38.01
   1  31  -6   70.21   38.61
  -1 -31   6  440.19  183.70
   1 -31  -6   59.45   70.73
   1  31  -5  770.41   67.46
  -1 -31   5  631.20  188.72
   1 -31  -5  686.05  141.79
  -1  31   4  660.56  171.79
   1  31  -4  869.87  138.33
  -1 -31   4 1184.85  216.74
   1 -31  -4  656.95  256.07
  -1  31   3  177.11   43.30
   1  31  -3  255.07   60.26
  -1 -31   3  219.97  107.23
   1 -31  -3  212.08  119.96
   1  31  -2 2162.85  355.25
  -1  31   2 2118.23  353.22
  -1 -31   2 1884.46  366.99
   1 -31  -2 1670.31  453.42
   1  31  -1  760.39  170.15
  -1  31   1  558.59  125.15
  -1 -31   1  405.67   96.94
   1 -31  -1  552.10  128.77
  -1  31   0    5.03   21.00
   1  31   0   33.95   27.13
  -1 -31   0   81.73   99.81
   1 -31   0  118.61   62.25
  -1  31  -1  398.79   71.51
   1  31   1  379.31   98.42
  -1 -31  -1  617.43  125.21
   1 -31   1  361.66  147.27
   1  31   2  231.16   59.67
  -1  31  -2  156.11   42.90
   1 -31   2  371.46  147.04
  -1 -31  -2   87.39   65.54
   1  31   3  636.20   99.38
  -1  31  -3  782.50  140.64
   1 -31   3  475.57  165.09
  -1 -31  -3  292.74  133.76
   1  31   4  490.39  121.61
  -1  31  -4  740.40  166.43
   1 -31   4 1082.00  214.88
  -1 -31  -4  438.64  137.46
  -1  31  -5  382.55  137.20
   1 -31   5  407.06  181.71
  -1 -31  -5  344.72   95.59
  -1  31  -6  181.28   77.86
   1 -31   6  190.49  171.01
  -1  31  -7   56.21   43.99
   1 -31   7  226.95  139.22
   1  33  -6   15.20   40.17
  -1 -33   6  516.33  203.17
   1 -33  -6  161.14   78.98
   1  33  -5  309.50   89.41
   1 -33  -5  386.68  136.47
  -1  33   4  -14.12   13.04
   1  33  -4   36.01   26.87
  -1 -33   4   99.26   77.50
   1 -33  -4  -72.01   79.85
  -1  33   3  121.68   45.90
   1  33  -3  228.94   68.07
  -1 -33   3  177.63  121.87
   1 -33  -3  148.00   81.01
   1  33  -2  253.36   79.82
  -1  33   2  252.29   63.24
  -1 -33   2  457.87  168.50
   1 -33  -2  340.49  122.77
  -1  33   1   82.21   34.45
   1  33  -1  118.37   30.44
  -1 -33   1   96.62  101.79
   1 -33  -1  194.15   94.18
   1  33   0   31.80   27.72
  -1  33   0   27.23   23.45
   1 -33   0  112.59  123.14
  -1  33  -1  205.25   63.71
   1  33   1  210.79   42.74
   1 -33   1  107.92  107.66
  -1 -33  -1  272.36  108.22
   1  33   2   65.23   28.08
  -1  33  -2  169.05   41.24
   1 -33   2   43.79  119.83
   1  33   3  443.89  127.84
  -1  33  -3  411.42  153.48
  -1 -33  -3  331.50  108.91
   1 -33   3  362.06  141.44
  -1  33  -4   77.21   32.92
   1 -33   4  235.14  127.49
  -1 -33  -4  124.33   80.68
  -1  33  -5   67.88   41.17
   1 -33   5  123.65  126.50
  -1  33  -6   33.11   40.38
   1 -33   6  410.16  194.94
   1  35  -5  327.67  187.23
  -1 -35   5  778.23  203.42
   1 -35  -5  442.06  157.10
   1  35  -4   18.66   25.12
  -1 -35   4  148.27  110.09
   1 -35  -4  129.12   73.00
   1  35  -3 1447.06  278.66
  -1 -35   3 1271.54  306.52
   1 -35  -3  853.08  257.04
  -1  35   2 1377.47  260.70
  -1 -35   2 1083.90  257.82
   1 -35  -2  832.69  202.73
   1  35  -1 1539.12  260.58
  -1  35   1 1317.09  229.57
   1 -35  -1 1055.16  159.61
  -1 -35   1 2008.67  397.25
  -1  35   0  132.47   31.54
   1  35   0  133.31   44.96
   1 -35   0  212.58  112.03
  -1 -35   0   58.27  103.51
  -1  35  -1  958.51  124.94
  -1 -35  -1 1276.63  275.96
   1 -35   1  827.92  150.58
  -1  35  -2  115.97   35.58
  -1 -35  -2  116.35   92.76
   1 -35   2  270.61  126.76
   1  35   3 2041.71  334.06
  -1  35  -3 2187.90  343.59
  -1 -35  -3  767.99  388.60
   1 -35   3 1099.89  434.90
   1 -35   4  620.96  180.47
  -1 -35  -4  200.86   85.23
  -1  35  -5 2205.80  283.85
   1 -35   5 1669.15  368.51
   1  37  -4   57.69   31.34
  -1 -37   4  243.71  145.85
   1 -37  -4    2.69   48.72
   1  37  -3  109.36   33.06
  -1 -37   3  299.51  137.60
   1 -37  -3  137.48   74.84
   1  37  -2   59.43   18.69
  -1  37   2   60.58   21.16
  -1 -37   2  392.30  128.91
   1 -37  -2   99.91   73.14
   1  37  -1   69.05   26.31
   1 -37  -1   58.51   53.72
  -1 -37   1   99.48   93.27
  -1  37   0  490.26  145.64
   1  37   0  671.86  177.54
  -1 -37   0  854.69  299.52
   1 -37   0  533.14  151.69
   1  37   1   84.46   34.14
  -1  37  -1   42.50   26.75
   1 -37   1  -68.37   98.98
  -1 -37  -1   55.06   92.47
   1  37   2   43.69   21.18
  -1  37  -2   44.65   29.77
   1 -37   2  375.46  175.31
  -1 -37  -2  191.03   91.81
   1  37   3  288.22   71.37
  -1  37  -3  196.36   63.13
   1 -37   3  508.70  183.31
  -1 -37  -3  321.70  128.34
  -1  37  -4  187.70   54.96
   1  39  -2   41.87   29.94
  -1 -39   2   65.67  122.14
  -1  39   1   97.80   28.94
   1  39  -1   68.44   51.93
   1 -39  -1  186.98  121.08
  -1 -39   1  496.14  182.40
   1  39   0   20.03   22.02
  -1 -39   0    8.83  103.18
   1 -39   0   38.05  116.11
   1  39   1   68.00   33.95
  -1  39  -1  106.91   31.68
  -1 -39  -1   48.30   92.55
   1  39   2   28.35   10.71
  -1  39  -2   38.64   22.72
   1 -39   2   75.09  135.19
   2   0 -12   61.05   38.58
   2   0 -11   64.36   35.44
   2   0 -10    9.34   17.52
   2   0 -10  -45.29   29.38
   2   0  -8  265.85   84.81
   2   0  -8  566.91  132.43
   2   0  -8  638.28  145.11
   2   0  -7   -2.53   18.40
   2   0  -7   45.61   28.11
   2   0  -6  309.48   72.91
   2   0  -6  358.35   40.87
   2   0  -6  319.71   64.88
   2   0  -6  288.31   44.57
   2   0  -5   28.00   20.42
  -2   0   5    6.39    6.84
   2   0  -5   52.49   40.76
   2   0  -5   -6.00   20.78
   2   0  -4  398.71   32.92
  -2   0   4  442.98   31.64
   2   0  -4  540.98   72.75
   2   0  -4  352.14   39.79
   2   0  -3   47.23   18.14
  -2   0   3   20.58   12.82
   2   0  -3  -10.50   19.58
  -2   0   243034.61 1040.05
   2   0  -245371.53 1096.24
   2   0  -245449.53 1103.33
   2   0  -1   15.12    5.98
  -2   0   1    8.50    7.31
   2   0  -1   54.90   16.50
  -2   0   1    7.29   18.54
  -2   0   0 7205.55  182.49
   2   0   0 6017.66  154.47
   2   0   0 7498.21  184.03
  -2   0   0 7973.77  195.77
   2   0   1   68.79   33.05
  -2   0  -1    4.01   40.81
   2   0   1   24.74   21.38
  -2   0  -1   19.51    7.67
   2   0   2 6603.27  193.56
  -2   0  -2 9023.33  251.28
   2   0   2 8364.75  224.30
  -2   0  -2 8083.53  212.67
   2   0   3   65.41   34.99
  -2   0  -3   52.90   28.03
   2   0   3   82.40   35.70
  -2   0  -3    5.16   13.02
   2   0   4 1752.44  213.66
  -2   0  -4 1774.90  240.45
   2   0   4 1909.99   96.96
  -2   0  -4 1805.47  170.73
   2   0   5  149.96   36.42
  -2   0  -5   62.78   20.29
   2   0   5   47.80   42.22
  -2   0  -5  131.52   58.89
  -2   0  -6 2753.46  303.21
  -2   0  -6 2706.78  122.67
  -2   0  -6 2700.18  143.99
  -2   0  -7   -2.78   20.95
  -2   0  -7   58.22   33.65
  -2   0  -8   39.22   32.73
  -2   0  -8  -16.92   46.49
  -2   0  -9  -24.42   23.87
  -2   0 -10  103.88   49.81
  -2   0 -10   79.97   30.41
  -2   0 -11   21.38   41.87
  -2   0 -12   48.67   28.16
   2   2 -12  206.19   72.38
   2  -2 -12  188.70   69.49
   2   2 -11  480.38  124.44
   2  -2 -11  364.45   74.93
   2   2 -10  195.70   49.92
   2   2 -10  119.91   22.83
   2  -2 -10   93.28   35.77
   2  -2 -10  223.96   45.14
   2   2  -9  342.64   91.01
   2   2  -9  547.02  161.45
   2   2  -9  899.15  156.15
   2  -2  -9  236.73   73.24
   2  -2  -9  554.92  122.16
   2  -2  -9  899.71  156.78
   2   2  -8 1117.31  338.58
   2   2  -8 2398.50  186.98
   2  -2  -8 1366.51  208.66
   2  -2  -8 2241.77  171.34
   2  -2  -8 2277.14  195.76
   2   2  -7  659.85   80.37
   2   2  -7  545.09  150.06
   2  -2  -7  464.98  105.25
   2  -2  -7  668.50   93.41
   2  -2  -7  685.69  144.16
   2   2  -6  515.88  174.13
   2   2  -6  810.15   82.94
   2  -2  -6  728.26   71.12
  -2  -2   6  670.97   65.21
   2  -2  -6  627.20  127.28
   2  -2  -6  647.39  161.67
   2  -2  -6  744.27   78.38
   2   2  -5 2916.41  108.05
   2   2  -5 3083.58  258.23
   2  -2  -5 2517.41  140.52
   2  -2  -5 3017.81  104.00
   2  -2  -5 2712.68  140.59
  -2  -2   5 3046.16  107.48
   2  -2  -5 3022.08  127.16
   2   2  -4  164.18   35.64
  -2   2   4  167.53   31.34
   2   2  -4  162.04   39.19
   2  -2  -4  193.49   26.91
  -2  -2   4  178.00   33.86
   2  -2  -4  183.21   32.48
   2   2  -3  830.36  172.04
  -2   2   3  545.51   43.09
   2   2  -3  595.20   50.22
  -2  -2   3  487.72   40.58
   2  -2  -3  561.40   43.08
   2  -2  -3  528.86   48.79
   2   2  -2 6223.37  188.31
   2   2  -2 6013.49  151.10
  -2   2   2 5975.88  146.74
  -2   2   2 6455.94  165.94
  -2  -2   2 6583.65  165.54
   2  -2  -2 6014.75  155.80
   2  -2  -2 6226.85  152.76
   2   2  -1 4992.06  126.19
  -2   2   1 4594.68  116.94
   2  -2  -1 3702.80   97.67
  -2  -2   1 4717.91  118.46
   2  -2  -1 4926.40  125.79
  -2   2   0 1476.05  131.98
  -2   2   0 1378.20  102.46
   2   2   0 1859.92   62.54
   2   2   0 1205.23   89.91
  -2  -2   0 1274.09   96.32
   2  -2   0 1227.10   99.30
   2  -2   0 1335.05   99.54
  -2  -2   0 1284.83   96.25
  -2   2  -1 7307.34  200.36
  -2   2  -1 6827.57  173.24
   2  -2   1 8287.22  239.86
  -2  -2  -1 8298.07  213.28
  -2  -2  -1 7830.79  190.10
   2   2   213239.29  359.25
  -2   2  -210635.98  289.30
  -2   2  -213295.70  343.92
   2   2   212985.35  333.84
   2  -2   213104.90  368.12
  -2  -2  -211898.70  299.97
   2  -2   213017.23  345.48
   2   2   3 1909.61   97.07
   2   2   3 1489.29  148.86
  -2   2  -3 1395.48  119.52
  -2   2  -3 1714.82  119.37
   2  -2   3 1749.33  163.56
   2  -2   3 1734.50  122.49
  -2  -2  -3 1975.01   77.97
  -2  -2  -3 2219.56   94.81
   2   2   4 1656.67  291.38
   2   2   4 1607.17  119.82
  -2   2  -4 1333.51  211.18
  -2   2  -4 1562.02  238.13
  -2  -2  -4 1599.51  121.08
   2  -2   4 1647.48  190.92
  -2  -2  -4 1644.19  112.94
   2  -2   4 1897.92  292.71
   2   2   5 1706.45  157.99
  -2   2  -5 2000.57  119.20
  -2   2  -5 1407.93  140.53
  -2   2  -5 1713.12   77.34
   2  -2   5 1679.42  220.40
  -2  -2  -5 2002.21  144.44
  -2  -2  -5 2030.85  202.40
   2   2   6  183.66   73.97
  -2   2  -6   73.89   44.15
  -2   2  -6  154.58   63.42
  -2   2  -6   35.39   13.50
   2  -2   6  103.20   35.29
  -2  -2  -6   74.88   49.62
  -2  -2  -6   66.53   28.66
  -2   2  -7 1786.52  371.99
  -2   2  -7 2840.37  156.50
  -2   2  -7 2594.79  175.38
   2  -2   7 3363.19  226.74
  -2  -2  -7 2607.06  142.33
  -2  -2  -7 2703.09  179.11
  -2   2  -8  245.19   34.35
  -2  -2  -8  192.95   40.74
  -2  -2  -8  234.86   58.78
  -2  -2  -8  120.00   64.39
  -2   2  -9    0.77   26.40
  -2  -2  -9   51.39   25.52
  -2  -2  -9   69.78   33.13
  -2   2 -10   83.39   40.16
  -2  -2 -10  132.38   41.18
  -2  -2 -10  185.41   42.54
  -2   2 -11   28.45   27.88
  -2  -2 -11   89.42   41.35
  -2  -2 -11   30.31   19.79
   2  -4 -12   30.36   42.15
   2   4 -11  375.08  144.21
   2  -4 -11  201.62   80.16
   2   4 -10 1557.45  178.03
   2   4 -10 1845.99  218.31
   2  -4 -10 1683.73  194.39
   2   4  -9  294.31   72.86
   2  -4  -9  225.74   50.81
   2  -4  -9   85.80   32.34
   2   4  -8  341.28   68.90
   2  -4  -8  184.29   52.16
   2  -4  -8   97.80   36.22
   2  -4  -8  316.53   64.87
   2   4  -7 1609.76  206.26
   2   4  -7 1905.40  113.28
   2  -4  -7 2037.19  113.90
   2  -4  -7 1363.88  215.11
   2  -4  -7 1532.60  337.99
   2  -4  -7 2044.85  134.37
   2   4  -6 3163.46  180.89
   2   4  -6 3801.95  158.28
   2  -4  -6 3838.92  150.85
  -2  -4   6 3808.21  154.19
   2  -4  -6 2852.15  158.46
   2  -4  -6 3897.94  205.07
   2  -4  -6 4005.05  167.62
   2   4  -5 1015.09  210.82
   2   4  -5  883.33   84.35
   2  -4  -5 1126.49  100.48
  -2  -4   5 1040.15  106.35
   2  -4  -5 1170.53  156.68
   2  -4  -5 1045.84   99.99
   2   4  -4 1071.55  191.22
   2   4  -4  866.83   59.68
   2  -4  -4  880.91   52.10
  -2  -4   4  864.63   55.73
   2  -4  -4 1008.36  104.55
   2  -4  -4  998.05  103.89
   2   4  -3 2120.16  130.87
  -2   4   3 3153.23   77.79
   2   4  -3 3342.01   93.22
  -2   4   3 2641.85   79.01
  -2  -4   3 2893.29   81.05
   2  -4  -3 3195.73   91.17
   2  -4  -3 3130.01   77.40
   2   4  -2 5236.33  136.59
  -2   4   2 5943.88  144.70
  -2   4   2 5485.79  148.17
   2   4  -2 5688.62  219.63
   2  -4  -2 5370.23  137.70
  -2  -4   2 5646.46  145.10
  -2  -4   2 5786.56  190.26
   2  -4  -2 5899.82  152.37
   2   4  -1  249.88   49.38
  -2   4   1  246.59   31.97
   2   4  -1  289.80   41.79
  -2   4   1  260.83   24.33
   2  -4  -1  407.04   59.83
  -2  -4   1  235.21   55.39
   2  -4  -1  322.28   59.17
  -2  -4   1  328.46   55.05
  -2   4   0 2673.38   72.01
   2   4   0 2745.13   91.91
   2   4   0 2862.23   76.05
  -2  -4   0 3102.61   81.77
   2  -4   0 2902.54  186.31
  -2   4  -111286.63  312.89
   2   4   111123.95  279.65
   2  -4   110554.36  319.82
  -2  -4  -1 8947.87  221.94
   2  -4   111006.50  293.84
  -2   4  -219889.19  507.69
  -2  -4  -220766.22  512.89
  -2  -4  -218572.92  454.01
   2  -4   216982.27  439.64
   2  -4   218012.31  491.84
  -2  -4  -220045.96  484.94
  -2   4  -3 6387.99  219.03
   2   4   3 5898.51  184.28
  -2   4  -3 5630.25  174.08
   2  -4   3 4743.37  179.75
  -2  -4  -3 5151.71  139.84
  -2  -4  -3 6024.50  164.84
   2  -4   3 6280.72  202.88
  -2   4  -4 1911.68  121.52
   2   4   4 2484.00  161.68
  -2   4  -4 2075.04  270.84
  -2   4  -4 2033.31   86.99
   2  -4   4 2057.78  173.50
  -2  -4  -4 2149.84   97.96
  -2  -4  -4 1570.25   97.66
   2   4   5  766.33  141.13
  -2   4  -5  495.75   91.71
  -2   4  -5  640.71   86.77
  -2   4  -5  463.25   67.10
  -2  -4  -5  324.91   56.73
   2  -4   5  615.83  142.39
  -2  -4  -5  574.35   89.63
   2   4   6 3125.80  236.81
  -2   4  -6 3627.40  248.47
  -2   4  -6 2331.83  323.30
  -2   4  -6 3342.40  197.77
   2  -4   6 3276.76  224.72
  -2  -4  -6 3077.50  198.06
  -2  -4  -6 4184.65  255.32
  -2   4  -7 1398.80  214.47
  -2   4  -7 1301.08  180.96
   2  -4   7 1358.58  330.19
  -2  -4  -7 1320.63  167.05
  -2   4  -8   72.96   36.36
  -2  -4  -8   16.97   17.21
   2  -4   8  191.07   65.12
  -2  -4  -8   75.59   68.19
  -2  -4  -8   26.80   25.75
  -2   4  -9  488.59  117.53
  -2  -4  -9  429.50  138.33
  -2  -4  -9  402.03   88.25
  -2   4 -10   46.08   31.96
  -2  -4 -10  103.13   35.24
  -2  -4 -10   69.00   36.30
  -2   4 -11   88.79   46.52
  -2  -4 -11   20.67   25.11
   2  -6 -12   21.53   17.07
   2   6 -11 1287.32  287.91
   2  -6 -11 1440.57  275.15
   2   6 -10   13.93   28.17
   2  -6 -10   63.26   30.47
   2   6  -9  670.08  169.15
   2  -6  -9  584.98  113.90
   2  -6  -9  655.90  127.93
   2   6  -8  245.63   55.67
   2  -6  -8   18.30   12.46
   2  -6  -8   98.26   36.66
   2  -6  -8  219.56   50.62
   2   6  -7  745.17   96.09
   2  -6  -7  540.49  100.21
   2  -6  -7  688.36   79.67
  -2  -6   7  471.04   99.64
   2  -6  -7  603.77  101.30
   2  -6  -7  602.10   96.20
   2   6  -6  277.24   73.59
   2   6  -6  290.41   43.15
   2  -6  -6  190.98   39.87
  -2  -6   6  201.78   34.66
   2  -6  -6  161.13   36.70
   2  -6  -6  182.37   30.42
   2   6  -5 3681.84  194.04
   2   6  -5 3628.91  150.04
  -2  -6   5 3818.01  154.03
  -2  -6   5 3744.31  223.80
   2  -6  -5 3439.19  130.12
   2  -6  -5 3695.79  151.83
   2   6  -4 1517.95   96.29
  -2   6   4 1610.25   98.32
   2   6  -4 1694.61  128.91
  -2  -6   4 2140.25  400.69
   2  -6  -4 1648.39  120.51
  -2  -6   4 1655.16  101.29
   2   6  -3  730.50   61.54
  -2   6   3  695.39   57.49
   2   6  -3  610.27   72.46
  -2  -6   3  822.77  183.51
   2  -6  -3  691.65   58.05
  -2  -6   3  648.91   53.76
  -2   6   2 2573.32   80.53
   2   6  -2 1885.34   56.34
  -2   6   2 2006.06   50.73
   2   6  -2 2050.02   91.68
  -2   6   2 1999.78   59.07
  -2  -6   2 1995.15   66.34
  -2  -6   2 2151.92  108.59
   2  -6  -2 2122.71   62.36
  -2   6   1  -21.59   24.16
   2   6  -1   -0.32   37.61
   2   6  -1   23.61    9.39
  -2   6   1   -2.24    7.06
  -2   6   1   -1.81   11.74
  -2  -6   1  -16.93   14.94
  -2  -6   1   -2.82   51.56
   2  -6  -1   10.52   18.66
  -2   6   0 4654.46  150.11
   2   6   0 4484.81  116.15
   2   6   0 4060.13  138.80
  -2  -6   0 4190.24  129.09
  -2  -6   0 4093.80  105.94
   2  -6   0 4226.16  135.70
  -2   6  -1 4713.80  160.91
   2   6   1 4477.60  116.42
  -2   6  -1 4910.67  130.16
  -2   6  -1 3767.78  107.85
  -2  -6  -1 4924.47  136.87
  -2   6  -2 1343.73  138.96
   2   6   2 1793.58   61.26
  -2   6  -2 1957.84  160.26
  -2   6  -2 1772.58  104.41
  -2  -6  -2 1743.72  100.61
   2  -6   2 1764.37  129.10
  -2   6  -3 2132.60  335.05
   2   6   3 2201.68  197.09
  -2   6  -3 1870.56   97.47
  -2   6  -3 1499.31   91.70
  -2  -6  -3 1727.21  157.23
   2  -6   3 1637.07  153.91
  -2  -6  -3 1755.19  169.33
  -2  -6  -3 1755.86  153.57
  -2   6  -4  162.52   47.69
   2   6   4  176.10   45.02
  -2   6  -4  108.13   42.26
  -2   6  -4  153.93   30.29
  -2  -6  -4  118.12   35.63
   2  -6   4  138.12   65.96
  -2  -6  -4  107.51   21.23
  -2  -6  -4  159.39   24.26
  -2   6  -5 1604.54  284.73
   2   6   5 1783.15  224.26
  -2   6  -5 1160.01  173.22
  -2   6  -5 1615.91   79.20
   2  -6   5 1688.29  119.30
  -2  -6  -5 1505.96  152.14
  -2  -6  -5 1319.30  114.02
  -2  -6  -5 1603.51   69.09
  -2   6  -6   -6.44   52.61
   2   6   6   99.05   31.71
  -2   6  -6   62.44   43.31
  -2   6  -6   91.91   32.45
   2  -6   6   73.08   45.90
  -2  -6  -6   48.06   39.08
  -2  -6  -6   53.47   23.38
  -2  -6  -6   58.73   16.06
   2   6   7  261.74   74.13
  -2   6  -7  368.32   64.85
   2  -6   7  327.27  117.39
  -2  -6  -7  302.52   69.34
  -2  -6  -7  322.69   48.00
  -2   6  -8   68.21   42.98
  -2  -6  -8   48.94   24.02
  -2  -6  -8   29.39   16.81
   2  -6   8   89.62   81.14
  -2  -6  -8   95.91   39.57
  -2  -6  -8   68.45   22.56
  -2   6  -9   52.66   23.22
  -2  -6  -9   23.00   29.61
  -2   6 -10  231.69   56.92
  -2  -6 -10  127.23   30.05
  -2  -6 -10   79.67   23.65
  -2   6 -11  257.94   75.59
  -2  -6 -11  398.24   89.19
   2   8 -12  -31.93   52.91
   2  -8 -12   -6.41   27.05
   2  -8 -11   83.40   49.29
   2   8 -10  101.49   27.60
   2  -8 -10  143.40   43.19
   2   8  -9 1828.75  181.82
   2  -8  -9 1408.33  133.47
   2  -8  -9 1768.98  204.69
   2   8  -8  109.83   45.86
   2  -8  -8   15.60    6.51
   2  -8  -8    1.27    3.04
   2  -8  -8   27.12   21.56
   2   8  -7  623.99  121.00
   2  -8  -7  347.60   43.55
   2  -8  -7  538.96   91.12
   2   8  -6   98.30   31.37
  -2  -8   6  106.45   24.79
  -2  -8   6  300.80  110.85
   2  -8  -6   81.03   22.05
   2   8  -5  227.89   41.19
   2   8  -5  268.34   77.20
  -2  -8   5  473.56  106.32
  -2  -8   5  230.41   28.60
   2  -8  -5  275.33   44.80
   2   8  -4   50.34   26.58
  -2   8   4   39.52   22.55
   2   8  -4   92.68   58.17
  -2  -8   4  107.32   53.75
   2  -8  -4   21.27   15.44
  -2  -8   4   29.37   20.44
   2   8  -3 3958.76  140.17
   2   8  -3 3529.87  163.08
  -2   8   3 3817.36  137.40
  -2  -8   3 3660.35  129.05
  -2  -8   3 3580.50  235.01
   2  -8  -3 3551.28  124.22
  -2   8   2  177.99   30.33
   2   8  -2  144.96   24.63
  -2   8   2  145.26   14.17
  -2   8   2  141.94   23.05
   2   8  -2  187.52   51.75
  -2  -8   2  179.42   68.65
   2  -8  -2  204.61   37.47
  -2  -8   2  162.13   22.72
  -2   8   1  163.70   45.35
   2   8  -1   37.79   16.31
  -2   8   1   81.26   15.42
   2   8  -1   68.53   22.58
  -2   8   1   29.08    6.33
  -2  -8   1   67.73   26.36
  -2  -8   1  268.85   73.75
   2  -8  -1   52.17   24.96
  -2   8   0  866.56  179.99
   2   8   0  620.82  114.57
   2   8   0  576.56   48.64
  -2   8   0  721.02   70.42
  -2   8   0  832.94   71.44
  -2  -8   0  558.75   46.39
  -2  -8   0  576.75   71.90
   2  -8   0  473.82   60.10
  -2   8  -1 2684.77  136.20
   2   8   1 3232.38   87.26
  -2   8  -1 2112.29   90.49
  -2   8  -1 3070.38   88.96
  -2  -8  -1 3282.99  114.99
   2  -8   1 3304.69  132.01
  -2  -8  -1 3063.60   83.40
  -2   8  -2  131.77   54.37
   2   8   2  257.21   52.49
  -2   8  -2  229.32   47.21
  -2   8  -2  356.04   59.31
   2   8   2  199.65   22.88
  -2  -8  -2  229.02   36.35
   2  -8   2  153.94   51.82
  -2  -8  -2  380.40   57.31
  -2   8  -322765.31  780.37
   2   8   316987.61  553.34
  -2   8  -323466.21  763.27
  -2   8  -322428.65  749.20
  -2  -8  -321554.48  692.44
   2  -8   323409.45  794.75
  -2  -8  -318624.51  595.33
  -2   8  -4  102.07   52.13
   2   8   4   46.19   27.90
  -2   8  -4  112.16   54.08
  -2   8  -4   53.08   24.99
  -2  -8  -4  109.62   24.34
   2  -8   4   88.13   53.02
  -2  -8  -4   20.94    6.99
  -2  -8  -4    0.81    4.58
  -2   8  -5 3580.23  422.75
   2   8   5 2845.74  195.73
  -2   8  -5 3187.44  160.97
  -2   8  -5 3389.91  166.09
  -2  -8  -5 3853.79  291.70
   2  -8   5 3289.97  187.26
  -2  -8  -5 4158.67  168.48
  -2  -8  -5 3636.24  142.99
   2   8   6  330.88   78.48
  -2   8  -6  166.81   43.55
  -2   8  -6  275.72   48.59
   2  -8   6  113.28   87.67
  -2  -8  -6  195.55   52.93
  -2  -8  -6  194.18   40.52
  -2  -8  -6  234.59   28.30
   2   8   7  168.68   50.92
  -2   8  -7  151.68   41.27
  -2  -8  -7  124.06   29.10
   2  -8   7  -11.98   66.78
  -2  -8  -7   99.93   49.56
  -2  -8  -7  147.91   30.96
  -2   8  -8  152.78   33.18
  -2  -8  -8   56.88   29.17
  -2  -8  -8  173.05   24.77
   2  -8   8  146.91  115.87
  -2  -8  -8  103.33   37.93
  -2  -8  -8  118.05   26.27
  -2   8  -9 1459.12  241.40
  -2  -8  -9 1127.49  139.56
   2  -8   9 1427.53  287.79
  -2  -8  -9 1225.94  151.53
  -2   8 -10  110.45   40.24
  -2  -8 -10   68.69   19.53
  -2   8 -11  450.65  129.83
   2  10 -11  430.66   98.45
   2 -10 -11  266.09   88.33
   2  10 -10  105.22   35.05
   2 -10 -10   40.17   30.97
   2  10  -9 1284.98  213.83
   2 -10  -9 1620.54  273.04
   2  10  -8 2178.89  191.13
   2 -10  -8 2291.62  196.33
   2  10  -7 1310.00  163.81
  -2 -10   7 1376.10  217.10
   2 -10  -7 1318.50  158.57
   2  10  -6   57.32   28.75
  -2 -10   6   17.99   15.66
  -2 -10   6   76.87   58.84
   2 -10  -6   34.17   18.04
   2  10  -5 1240.59  112.51
   2  10  -5  982.80  247.87
  -2  10   5 1224.52  145.86
  -2 -10   5 1166.33  424.96
   2 -10  -5 1183.35  106.21
   2  10  -4 1726.76  147.67
  -2  10   4 1529.34  138.13
   2  10  -4 1992.24  152.60
  -2 -10   4 1934.69  374.67
   2 -10  -4 1605.13  144.59
  -2 -10   4 1680.50  152.97
  -2  10   3   87.47   20.68
   2  10  -3   97.33   25.47
   2  10  -3  164.08   57.23
  -2  10   3   54.59   12.34
  -2 -10   3   87.99   20.99
  -2 -10   3  149.84   48.57
   2 -10  -3  123.54   20.58
  -2  10   2 1097.75  126.47
   2  10  -2  986.39   79.95
  -2  10   2  948.32   72.13
  -2  10   2  986.74   78.48
   2  10  -2 1137.36  108.98
  -2 -10   2 1036.00  119.94
   2 -10  -2  796.76   68.75
  -2 -10   2  911.01   60.12
  -2  10   1 5925.29  151.48
   2  10  -1 5802.68  186.70
  -2  10   1 5887.42  153.01
  -2 -10   1 6061.64  159.91
   2 -10  -1 5243.68  133.74
  -2 -10   1 5507.71  183.46
  -2  10   0  485.78   48.16
   2  10   0  500.62   42.23
  -2  10   0  701.60   85.16
   2  10   0  645.34  108.54
  -2 -10   0  505.61   56.32
   2 -10   0  464.62   46.61
  -2 -10   0  409.56   56.57
   2 -10   0  544.96   91.14
  -2  10  -1  591.27   76.80
   2  10   1  555.10   81.03
   2  10   1  390.04   55.92
  -2  10  -1  465.79   44.41
  -2  10  -1  432.98   79.45
  -2 -10  -1  562.62  101.07
  -2 -10  -1  528.01   63.34
   2 -10   1  739.39  122.46
  -2  10  -2  591.00   87.59
   2  10   2  602.05   76.49
  -2  10  -2 1070.82  214.89
  -2  10  -2  557.04   42.76
   2  10   2  602.80   36.67
  -2 -10  -2  572.58   37.23
   2 -10   2  689.59   89.34
  -2 -10  -2  699.90   91.18
  -2  10  -3  325.71   88.18
   2  10   3  153.00   27.54
  -2  10  -3  121.94   25.52
  -2  10  -3   90.21   44.41
   2  10   3   95.25   13.64
  -2 -10  -3   87.49   23.47
   2 -10   3  123.25   76.01
  -2 -10  -3  104.71   21.26
  -2  10  -4 5675.24  336.38
   2  10   4 7865.38  351.86
  -2  10  -4 6396.09  254.48
  -2  10  -4 5819.57  420.98
  -2 -10  -4 6260.04  240.13
   2 -10   4 5946.31  288.21
  -2 -10  -4 6129.88  233.88
  -2  10  -5 3578.88  602.76
   2  10   5 3565.66  213.41
  -2  10  -5 3488.54  179.36
  -2  10  -5 3672.61  156.39
  -2 -10  -5 3536.52  195.49
   2 -10   5 3173.67  186.27
  -2 -10  -5 3121.34  124.68
  -2 -10  -5 3773.58  148.33
   2  10   6  765.89  116.37
  -2  10  -6  642.24  116.28
  -2 -10  -6  491.23   91.73
  -2 -10  -6  735.74  156.67
   2 -10   6  667.06  122.73
  -2 -10  -6  629.79  105.06
   2  10   7  863.06  169.00
  -2  10  -7  849.16  132.10
  -2 -10  -7  707.77  115.44
   2 -10   7  939.63  238.60
  -2 -10  -7 1024.99  168.16
  -2 -10  -7 1142.57  180.05
   2  10   8  292.96   87.28
  -2  10  -8  246.46   81.53
  -2 -10  -8  124.97   30.28
   2 -10   8  284.23   96.56
  -2 -10  -8  107.98   48.49
  -2 -10  -8  155.72   42.64
  -2  10  -9   71.03   44.03
  -2 -10  -9   -9.41   15.51
   2 -10   9  312.48  129.62
  -2 -10  -9   24.70   15.06
  -2  10 -10  431.44  184.98
   2 -10  10  797.89  168.84
  -2  10 -11  103.67   36.87
   2  12 -11  419.43   99.82
   2 -12 -11  171.80   61.91
   2  12 -10   33.66   36.61
   2  12  -9  793.60  180.21
   2 -12  -9  707.04  173.17
   2  12  -8  309.89   66.17
  -2 -12   8  527.91  171.04
   2 -12  -8  273.51   70.56
   2  12  -7 1163.88  229.53
  -2 -12   7  847.24  245.98
   2 -12  -7 1071.52  197.74
   2  12  -6  379.15   67.76
  -2 -12   6  195.31   83.36
   2 -12  -6  243.05   46.74
   2  12  -5  459.25   83.98
  -2  12   5  338.11   44.81
  -2 -12   5  370.77   44.16
   2 -12  -5  266.44   47.36
  -2 -12   5  252.19   97.01
   2  12  -4   53.22   42.86
  -2  12   4   89.04   16.88
   2  12  -4   65.59   63.27
  -2 -12   4  101.56   72.23
   2 -12  -4  150.35   25.25
  -2 -12   4  102.50   30.84
  -2  12   3 9334.90  315.12
  -2  12   310056.30  324.66
   2  12  -311132.11  373.33
  -2  12   310946.10  360.87
   2  12  -310004.03  372.06
  -2 -12   310703.00  403.57
   2 -12  -310140.65  334.36
  -2 -12   3 9505.08  317.55
   2  12  -2   89.64   24.06
  -2  12   2  112.19   18.94
   2  12  -2   82.79   48.73
  -2  12   2   87.51   15.83
  -2 -12   2  104.02   36.24
  -2 -12   2   60.38   28.23
   2 -12  -2  111.25   27.30
   2 -12  -2   86.55   13.30
   2  12  -1 3625.24  141.15
   2  12  -1 3366.42  159.55
  -2  12   1 3465.35  118.50
  -2  12   1 3721.92  128.26
  -2 -12   1 3944.83  175.30
  -2 -12   1 3704.41  131.06
   2 -12  -1 3587.23  146.41
   2 -12  -1 3514.25  119.10
   2  12   0  208.62   33.63
   2  12   0  284.49   63.61
  -2  12   0  309.93   49.69
  -2  12   0  355.58   65.90
   2 -12   0  199.81   20.07
  -2 -12   0  211.85   29.77
  -2 -12   0  237.34   64.71
   2 -12   0  174.46   45.97
   2  12   1   61.86   18.31
   2  12   1   39.09   11.14
  -2  12  -1   39.13   18.15
  -2  12  -1   83.11   31.69
  -2 -12  -1   80.53   21.84
   2 -12   1   88.72   69.25
  -2 -12  -1   72.64   39.84
   2 -12   1   42.44   15.66
   2  12   2  553.90   77.60
  -2  12  -2  894.54  184.40
  -2  12  -2  549.44   63.80
   2  12   2  498.58   51.93
  -2 -12  -2  575.23   86.20
  -2 -12  -2  517.83   45.63
   2 -12   2  660.91  127.87
  -2  12  -310692.42  409.94
   2  12   313625.78  450.50
  -2  12  -312037.26  400.35
  -2  12  -313063.91  465.59
   2  12   311919.83  385.75
  -2 -12  -312158.09  395.46
   2 -12   311066.47  418.52
  -2 -12  -3 9763.61  321.29
  -2  12  -4 2076.08  335.73
   2  12   4 1467.36  157.75
  -2  12  -4 1998.94   92.45
  -2  12  -4 1915.90  335.98
  -2 -12  -4 2387.90   96.51
   2 -12   4 1778.05  226.08
  -2 -12  -4 3064.33  123.72
   2  12   5 1520.30  331.23
  -2  12  -5 1596.45  104.89
  -2 -12  -5 1561.02   92.67
   2 -12   5 1478.72  332.96
  -2 -12  -5 1493.82  309.28
   2  12   6   60.47   37.12
  -2  12  -6   49.80   25.61
  -2 -12  -6   -1.63    5.38
   2 -12   6  110.54   83.91
  -2 -12  -6   14.53   20.26
  -2 -12  -6   12.51   12.19
   2  12   7   30.53   20.72
  -2  12  -7   59.93   26.94
  -2 -12  -7   -7.74    7.95
   2 -12   7   25.67   90.78
  -2 -12  -7   19.79   11.08
   2  12   8   77.36   40.41
  -2  12  -8   67.48   31.00
  -2 -12  -8   38.37   15.17
  -2 -12  -8   35.25   32.62
   2 -12   8  -46.30   92.16
  -2 -12  -8   49.95   19.73
  -2  12  -9  892.70  207.38
  -2 -12  -9  663.27  130.18
   2 -12   9  649.37  215.26
  -2 -12  -9  826.96  129.64
  -2  12 -10  104.85   44.38
   2 -12  10  202.87  103.93
  -2  12 -11  299.01   77.21
   2  14 -11  155.58   96.10
   2 -14 -11  197.99   98.33
   2  14 -10   73.14   37.33
   2 -14 -10   36.95   22.30
   2  14  -9  246.02   45.85
   2 -14  -9  246.40   36.01
   2  14  -8  615.50  150.80
  -2 -14   8  633.54  181.75
   2 -14  -8  600.35  125.82
   2  14  -7   42.73   37.70
  -2 -14   7  203.74   83.71
   2 -14  -7   23.94   23.51
   2  14  -6   69.76   33.87
  -2  14   6   23.04   17.96
   2 -14  -6   43.55   22.50
  -2 -14   6  313.36  113.22
   2  14  -5 1222.99  166.13
  -2  14   5  841.50  106.27
   2 -14  -5  982.32  121.83
  -2 -14   5  805.19  160.74
  -2  14   4   94.15   17.85
  -2  14   4   45.51    9.34
   2  14  -4   68.65   30.41
  -2  14   4   57.96   15.09
   2  14  -4  110.12   58.98
  -2 -14   4   91.48   54.42
   2 -14  -4  111.98   21.85
  -2 -14   4  147.14   22.71
  -2  14   3   11.55    6.28
   2  14  -3   48.15   35.62
  -2  14   3   37.89   21.67
   2  14  -3  118.95   84.30
  -2 -14   3   31.53   22.75
  -2 -14   3  163.45  112.70
   2 -14  -3   24.57   17.06
   2 -14  -3   37.28   10.05
   2  14  -2 3134.56  115.84
   2  14  -2 2982.09  151.05
  -2  14   2 3754.62  139.24
  -2  14   2 3589.34  127.20
  -2 -14   2 3248.57  165.39
  -2 -14   2 3174.03  118.56
   2 -14  -2 4074.67  150.90
   2 -14  -2 3341.19  114.58
   2  14  -1  368.70   71.65
  -2  14   1  290.21   45.54
  -2  14   1  232.60   42.97
   2  14  -1  308.51   54.90
  -2 -14   1  255.48   36.34
  -2 -14   1  275.22   67.57
   2 -14  -1  148.17   30.36
   2 -14  -1  202.90   24.78
   2  14   0 1340.98   95.37
  -2  14   0 1697.93  109.46
  -2  14   0 1211.36   78.01
   2  14   0 1841.07  169.52
  -2 -14   0 1315.66   82.76
   2 -14   0 1623.87  134.10
  -2 -14   0 1506.32  121.77
   2 -14   0 1280.50   78.69
   2  14   1  170.66   23.15
  -2  14  -1  128.83   28.33
  -2  14  -1   66.69   17.87
   2  14   1   43.39   14.45
  -2 -14  -1   46.28   14.14
   2 -14   1  161.41   56.75
  -2 -14  -1  121.77   50.26
   2 -14   1  105.27   16.58
   2  14   2 2498.73  100.12
   2  14   2 2650.34   94.14
  -2  14  -2 2688.49  103.71
  -2  14  -2 1481.36  139.07
  -2 -14  -2 2250.89   82.45
   2 -14   2 1594.58  167.89
  -2 -14  -2 2644.31  139.06
   2 -14   2 2212.06   85.22
  -2  14  -3   23.86   57.75
   2  14   3    0.44   17.64
  -2  14  -3   91.28   53.90
  -2  14  -3   45.53   24.56
   2  14   3    7.48    7.89
   2 -14   3   98.18   76.06
  -2 -14  -3   10.69    8.25
  -2 -14  -3   53.60   20.84
  -2  14  -4 2814.09  467.14
   2  14   4 2758.69  120.26
  -2  14  -4 3476.58  181.00
  -2  14  -4 3196.08  517.69
   2  14   4 3240.16  130.00
  -2 -14  -4 3578.94  142.20
   2 -14   4 3160.79  191.69
  -2 -14  -4 3598.55  145.56
   2  14   5  915.19  142.43
  -2  14  -5  781.12  123.05
  -2 -14  -5  750.59   91.73
   2 -14   5  633.41  122.95
  -2 -14  -5 1116.39  163.29
   2  14   6  686.23  114.22
  -2  14  -6 1147.73  189.12
  -2 -14  -6  966.63  126.64
  -2 -14  -6  799.96  171.70
   2 -14   6  804.00  133.53
  -2 -14  -6  985.17  124.30
   2  14   7   43.00   26.60
  -2  14  -7   55.55   26.87
  -2 -14  -7   47.94   16.22
  -2 -14  -7   -6.17   24.79
   2 -14   7  219.07   89.11
  -2 -14  -7   51.57   17.62
   2  14   8   29.97   41.55
  -2  14  -8  105.54   36.21
  -2 -14  -8   60.50   22.14
   2 -14   8  234.87  112.06
  -2 -14  -8   79.52   16.27
  -2  14  -9   12.65   31.68
  -2 -14  -9    9.25   15.78
   2 -14   9  110.40   67.67
  -2  14 -10  888.34  174.29
   2 -14  10  460.01  197.22
  -2  14 -11  199.40   81.20
   2 -14  11  102.23  102.90
   2  16 -11  221.11   58.72
   2  16 -10   33.04   31.60
   2 -16 -10   20.61   19.49
   2  16  -9  331.09   64.42
  -2 -16   9  191.40  114.75
   2 -16  -9  221.87   51.74
   2  16  -8  500.30  151.30
  -2 -16   8  268.65  208.07
   2 -16  -8  492.69  125.83
   2  16  -7  187.63   40.54
  -2 -16   7  188.39   79.23
   2 -16  -7  188.31   32.25
   2  16  -6   -7.83   34.49
  -2 -16   6   95.17   94.52
   2 -16  -6   38.38   11.08
   2  16  -5  751.79   97.19
  -2  16   5  642.77  107.46
   2 -16  -5  587.89  112.13
  -2 -16   5  651.97  177.52
  -2  16   4    6.02    3.94
   2  16  -4   35.55   29.85
  -2  16   4   48.76   18.73
   2 -16  -4   44.28   22.33
  -2 -16   4  285.43  119.53
  -2  16   3 1160.23  102.67
   2  16  -3 1121.78  102.09
  -2  16   3 1252.88  163.15
   2  16  -3  788.74   94.30
  -2 -16   3  807.81  162.88
  -2 -16   3  980.59  143.11
   2 -16  -3 1451.63  147.62
   2 -16  -3 1085.68   90.77
   2  16  -2  504.11   56.92
   2  16  -2  555.22   95.45
  -2  16   2  668.80   86.01
  -2  16   2  558.74   59.93
  -2 -16   2  564.00  107.81
  -2 -16   2  450.53   48.62
   2 -16  -2  595.45  110.90
   2 -16  -2  421.93   48.32
   2  16  -1  500.64   53.96
   2  16  -1  412.26   75.33
  -2  16   1  444.88   58.67
  -2  16   1  462.92   78.84
  -2 -16   1  510.32   92.36
  -2 -16   1  356.16   59.56
   2 -16  -1  277.27   48.35
   2 -16  -1  481.27   48.47
   2  16   0 1411.10  127.40
  -2  16   0 1844.94  176.40
  -2  16   0 1347.37  122.80
   2  16   0 1793.05  164.81
  -2 -16   0 1506.36  138.06
   2 -16   0 2049.91  131.00
  -2 -16   0 1514.20  162.32
   2 -16   0 1694.82  142.85
   2  16   1  258.94   30.79
   2  16   1  238.60   34.98
  -2  16  -1  217.06   32.14
  -2  16  -1  260.58   44.68
  -2 -16  -1  258.74   35.18
   2 -16   1  128.67   67.48
  -2 -16  -1  150.79   47.64
   2 -16   1  221.62   30.24
   2  16   2   81.51   21.19
  -2  16  -2   64.14   28.02
   2  16   2   50.68   11.49
  -2 -16  -2   61.27   16.99
   2 -16   2   75.51   26.16
  -2 -16  -2   42.02   36.06
   2 -16   2   98.56   73.49
   2  16   3  342.61   49.97
   2  16   3  375.65   56.50
  -2  16  -3  636.39  113.24
  -2  16  -3  453.24   95.48
  -2 -16  -3  454.21   54.91
  -2 -16  -3  468.85   68.57
   2 -16   3  527.60  103.02
   2 -16   3  351.15   42.60
   2  16   4   40.93   24.64
   2  16   4   66.71   17.86
  -2  16  -4  124.28   33.65
   2 -16   4  288.87   98.48
  -2 -16  -4   44.40   21.42
  -2 -16  -4  110.69   18.99
   2  16   5  146.12   38.51
  -2  16  -5  130.09   37.84
  -2 -16  -5  103.51   27.69
   2 -16   5  241.48   93.42
  -2 -16  -5  134.52   35.74
   2  16   6  938.63  166.75
  -2  16  -6  714.15  117.65
  -2 -16  -6  817.64  135.46
   2 -16   6  588.49  160.31
  -2 -16  -6 1153.30  203.88
   2  16   7   42.18   43.61
  -2  16  -7   65.18   17.49
  -2 -16  -7   31.54   10.52
   2 -16   7  328.33  136.51
  -2 -16  -7   90.97   46.15
  -2 -16  -7   40.97   16.77
   2  16   8   54.02   29.81
  -2  16  -8   54.66   33.25
   2 -16   8  365.21  151.06
  -2 -16  -8   24.22   14.81
  -2  16  -9    1.40   34.33
   2 -16   9  250.04  158.33
  -2  16 -10   11.50   38.44
   2 -16  10  121.02   43.60
   2  18 -11  158.23   74.24
   2  18 -10   61.88   33.57
   2 -18 -10   54.45   29.15
   2  18  -9 1287.27  155.82
  -2 -18   9 1859.04  278.90
   2 -18  -9  862.89  160.57
   2  18  -8   54.00   34.90
   2 -18  -8   61.94   24.64
   2  18  -7  911.22  155.29
  -2 -18   7  626.12  302.94
   2 -18  -7  873.65  171.69
   2  18  -6   43.34   32.88
  -2 -18   6   27.10   78.11
   2 -18  -6   21.68   17.17
  -2  18   5 1812.91  126.98
   2  18  -5 2489.50  173.10
  -2  18   5 1832.82  161.78
   2 -18  -5 2363.16  182.71
  -2 -18   5 2486.22  358.38
  -2  18   4  128.61   22.02
   2  18  -4  207.61   56.89
  -2  18   4  121.78   38.89
   2 -18  -4   95.91   21.56
   2 -18  -4  237.15   43.29
  -2 -18   4  307.92  131.10
   2  18  -3  391.32   57.26
  -2  18   3  518.69   74.09
  -2  18   3  421.27   77.84
   2  18  -3  471.70   84.84
  -2 -18   3  679.24  130.43
   2 -18  -3  543.77  108.32
   2 -18  -3  460.86   57.90
   2  18  -2  209.74   43.96
   2  18  -2   74.73   62.05
  -2  18   2  154.73   28.03
  -2  18   2   93.29   17.93
  -2 -18   2   75.23   83.04
  -2 -18   2   55.52   33.99
   2 -18  -2   87.00   45.26
   2 -18  -2   50.99   20.98
   2  18  -1 1846.69   85.19
  -2  18   1 1950.45   87.49
  -2  18   1 1523.17  159.19
   2  18  -1 2210.64  205.41
  -2 -18   1 1808.36   82.95
  -2 -18   1 2365.81  164.85
   2 -18  -1 1251.35  185.76
   2 -18  -1 1934.89   86.25
   2  18   0   69.43   25.00
   2  18   0   35.85   14.52
  -2  18   0   76.61   25.08
  -2  18   0   59.48   21.11
  -2 -18   0   80.78   30.31
   2 -18   0  134.68   94.62
  -2 -18   0  219.42  112.31
   2 -18   0   93.21   27.40
   2  18   1 5198.52  204.78
  -2  18  -1 4602.50  293.25
  -2  18  -1 4528.33  185.98
   2  18   1 5691.50  227.70
  -2 -18  -1 5216.04  207.00
   2 -18   1 5220.78  259.86
  -2 -18  -1 5243.83  258.02
   2 -18   1 4935.35  200.08
   2  18   2   11.79    8.66
   2  18   2   18.81   11.13
  -2  18  -2   20.96   12.40
  -2  18  -2   17.30   14.10
  -2 -18  -2    4.15   14.43
  -2 -18  -2  128.76   53.41
   2 -18   2  168.03   73.37
   2 -18   2   71.66   26.37
   2  18   3  295.17   49.85
   2  18   3  244.61   56.69
  -2  18  -3  382.86   56.62
   2 -18   3  289.73  129.01
  -2 -18  -3  266.01   58.67
  -2 -18  -3  362.83   61.12
   2  18   4   14.50   17.15
  -2  18  -4   43.00   27.88
  -2 -18  -4   36.76   16.57
   2 -18   4  143.22  118.39
  -2 -18  -4    9.27   20.14
   2  18   5 1658.07  193.58
   2  18   5 2063.71  121.12
  -2  18  -5 1857.35  137.23
   2 -18   5 1885.46  186.71
  -2 -18  -5 1663.03  150.70
  -2 -18  -5 1971.83  115.70
   2  18   6   90.19   41.39
  -2  18  -6   26.20   38.61
  -2 -18  -6   15.18    7.22
   2 -18   6  -46.13   90.08
  -2 -18  -6   -9.35   13.35
   2  18   7   27.00   40.85
  -2  18  -7   40.62   25.13
  -2 -18  -7   17.04   13.96
   2 -18   7  120.75  104.37
  -2 -18  -7    2.36   20.87
  -2 -18  -7   74.07   21.80
   2  18   8  144.16   48.53
  -2  18  -8   73.40   51.48
   2 -18   8  -13.87  104.70
  -2  18  -9   52.56   44.29
   2 -18   9  140.80   57.19
  -2  18 -10  -10.26   42.69
   2 -18  10  162.80  124.96
   2  20 -10  941.39  144.89
   2 -20 -10  836.06  115.28
   2  20  -9   32.67   61.04
  -2 -20   9  -15.31  118.79
   2 -20  -9   26.54   20.88
   2  20  -8   91.09   38.98
  -2 -20   8   13.62   78.12
   2 -20  -8   55.40   20.46
   2  20  -7   32.64   24.30
  -2 -20   7  135.91  110.00
   2 -20  -7   14.31   11.15
   2  20  -6 2269.74  199.61
  -2 -20   6 1927.87  501.33
   2 -20  -6 1910.08  233.36
  -2  20   5   46.26   20.00
  -2  20   5   -1.04    5.18
   2  20  -5   51.65   34.62
  -2 -20   5   71.32   94.21
   2 -20  -5   70.71   28.20
  -2  20   4  264.58   57.71
   2  20  -4  432.60   71.24
   2 -20  -4  223.52   59.39
  -2 -20   4  544.45  133.04
   2 -20  -4  396.00   69.80
  -2  20   3  605.05   85.21
   2  20  -3  742.61   95.46
  -2  20   3  594.85   86.61
   2 -20  -3  595.18   72.98
   2 -20  -3  663.04  119.84
  -2 -20   3  486.56  124.06
   2  20  -2   26.81   12.77
  -2  20   2   34.74   19.96
  -2  20   2   20.95   15.53
   2  20  -2  118.31   32.10
  -2 -20   2  112.86   77.66
   2 -20  -2   25.22   24.27
   2 -20  -2   26.25   16.25
   2  20  -1   37.27   16.64
  -2  20   1   58.40   21.18
   2  20  -1   49.49   44.71
  -2 -20   1   58.18   29.19
   2 -20  -1   55.74   58.14
  -2 -20   1   77.27   49.12
   2  20   0 8367.08  326.45
  -2  20   0 8623.84  339.45
  -2  20   0 9840.67  389.48
   2 -20   0 8341.89  326.92
  -2 -20   0 8489.04  379.38
   2 -20   0 8650.74  383.10
  -2 -20   0 7794.48  306.49
   2  20   1  390.11   65.75
  -2  20  -1  496.17  106.58
   2  20   1  244.52   71.55
  -2 -20  -1  215.30   34.43
   2 -20   1  225.78   31.38
   2 -20   1  474.82  114.73
  -2 -20  -1  311.57   79.19
   2  20   2 1000.14  133.20
  -2  20  -2  937.16  121.73
   2  20   2  735.87  108.61
  -2 -20  -2  889.22  131.77
   2 -20   2  673.69  162.94
   2  20   3  507.52   78.73
   2  20   3  463.21   65.77
  -2  20  -3  585.74   82.44
   2 -20   3  567.11  126.02
  -2 -20  -3  457.90   70.72
  -2 -20  -3  531.87   66.69
   2  20   4   45.63   14.47
  -2  20  -4   30.45   31.28
   2  20   4   10.20    9.83
  -2 -20  -4    5.83   12.67
   2 -20   4  121.46   95.48
   2  20   5   25.76   15.56
   2  20   5    8.65    8.30
  -2  20  -5   50.18   38.67
   2 -20   5   58.94   65.21
  -2 -20  -5   48.77   41.16
  -2 -20  -5   32.44   17.10
   2  20   6 4179.40  538.46
  -2  20  -6 3522.40  428.69
  -2 -20  -6 3473.96  414.58
   2 -20   6 3309.11  654.70
  -2 -20  -6 3033.40  365.45
   2  20   7  288.47   73.70
  -2  20  -7  492.39   90.03
   2 -20   7  151.03  105.02
  -2 -20  -7  273.20   61.51
  -2  20  -8  146.57   44.96
   2 -20   8  230.98  122.48
  -2  20  -9   56.75   40.89
   2 -20   9  125.48   78.04
  -2  20 -10  190.00   75.19
   2 -20  10  103.54   40.26
  -2 -22  10  -20.86  109.09
   2  22  -9  122.50   45.35
  -2 -22   9  155.44  105.47
   2 -22  -9   18.06   16.87
   2  22  -8   26.82   30.96
  -2 -22   8 -100.85  116.54
   2 -22  -8   35.48   22.51
   2  22  -7   69.40   29.11
  -2 -22   7  145.05   90.69
   2 -22  -7  226.53   60.42
   2  22  -6  397.61   96.89
  -2 -22   6  542.75  184.49
   2 -22  -6  681.69  163.72
  -2  22   5 1328.87  254.13
  -2  22   5 2088.19  174.64
   2  22  -5 2050.41  183.20
  -2 -22   5 1801.14  431.81
   2 -22  -5 1819.52  202.19
  -2  22   4  255.07   63.99
   2  22  -4  351.89   64.36
   2 -22  -4  220.76   43.04
  -2 -22   4  366.24  150.94
   2 -22  -4  323.24   68.59
   2  22  -3  889.76  152.60
  -2  22   3  789.83  110.36
   2 -22  -3  865.09  104.39
  -2 -22   3  972.04  171.85
   2 -22  -3  764.41  146.30
  -2  22   2   55.85   18.86
   2  22  -2   65.53   32.78
   2 -22  -2   45.42   24.82
  -2 -22   2   70.35   85.89
   2 -22  -2  144.25   65.54
   2  22  -1  248.72   47.91
  -2  22   1  294.69   48.83
   2 -22  -1  142.98   40.15
  -2 -22   1  465.73  147.10
   2 -22  -1  314.80   97.45
   2  22   0 3706.58  197.60
  -2  22   0 3540.15  192.45
   2  22   0 2584.48  183.42
   2 -22   0 3451.32  185.20
   2 -22   0 3389.22  233.91
  -2 -22   0 3979.07  279.74
   2  22   1 4413.58  231.75
   2  22   1 5308.59  280.60
  -2  22  -1 4277.84  232.57
  -2 -22  -1 4647.08  288.04
   2 -22   1 3931.58  258.93
  -2 -22  -1 3820.61  204.30
   2  22   2  103.85   35.56
  -2  22  -2  121.92   40.42
  -2 -22  -2   69.69   31.94
  -2 -22  -2  104.25   76.09
   2 -22   2    4.17   71.39
   2  22   3   70.37   24.42
   2  22   3    6.89   10.26
  -2  22  -3  102.24   42.53
   2 -22   3  143.34   94.58
  -2 -22  -3  115.96   67.90
  -2 -22  -3    1.00   15.02
   2  22   4  113.63   40.51
   2  22   4    7.40   10.48
  -2  22  -4   32.94   33.23
   2 -22   4  176.43  100.67
  -2 -22  -4   84.38   38.12
  -2 -22  -4    7.84   15.99
   2  22   5  254.03   58.83
  -2  22  -5  431.83   87.26
  -2 -22  -5  259.17   52.47
   2 -22   5  689.53  195.01
  -2 -22  -5  510.13  110.74
   2  22   6  921.37  205.20
  -2  22  -6  743.35  147.04
   2 -22   6  783.03  207.00
   2  22   7 1175.29  209.07
  -2  22  -7 1435.28  268.26
   2 -22   7 1678.14  256.25
  -2 -22  -7  917.76  163.18
  -2  22  -8   66.37   45.95
   2 -22   8  -30.43  111.86
  -2  22  -9  -29.24   40.64
   2 -22   9  123.07   72.49
   2  24  -9  361.47   87.15
  -2 -24   9  262.23  154.24
   2 -24  -9  332.76  118.57
   2  24  -8  -19.10   39.20
  -2 -24   8   17.30  106.36
   2  24  -7  433.74  138.15
  -2 -24   7  664.26  237.80
   2 -24  -7  768.15  150.32
   2  24  -6   51.13   51.66
  -2 -24   6  382.10  123.22
   2 -24  -6   76.60   33.14
  -2  24   5   11.30    5.67
   2  24  -5   42.21   35.68
  -2 -24   5  129.75  141.04
   2 -24  -5    4.20   21.51
  -2  24   4   52.69   15.06
   2  24  -4   39.11   46.10
   2 -24  -4   23.95   10.92
  -2 -24   4  -14.78   99.57
   2 -24  -4   73.07   45.97
   2  24  -3 1214.10  238.85
  -2  24   3 1014.60  169.77
   2 -24  -3  906.45  137.89
  -2 -24   3  928.95  200.23
   2 -24  -3  561.86  116.57
  -2  24   2   34.81   21.95
   2  24  -2   47.31   26.23
   2 -24  -2   -3.81   15.80
  -2 -24   2  412.81  134.78
   2 -24  -2   54.51   65.69
   2  24  -1 2415.69  146.79
  -2  24   1 2604.29  156.93
   2 -24  -1 2185.13  134.47
  -2 -24   1 3172.34  338.24
   2 -24  -1 2496.23  465.58
   2  24   0 1437.63  204.45
  -2  24   0 1387.79  174.64
   2  24   0 1262.59  165.12
   2 -24   0 1013.75  380.00
  -2 -24   0 1748.98  163.08
   2  24   1  531.59  105.57
  -2  24  -1  538.19   77.93
   2  24   1  457.80   98.39
   2 -24   1  519.30  136.50
  -2 -24  -1  538.07  112.91
   2  24   2  367.98   76.06
  -2  24  -2  322.71   64.06
   2  24   2  154.75   43.53
  -2 -24  -2  141.07   88.54
   2 -24   2  194.83  103.51
   2  24   3 1875.29  159.98
   2  24   3 1870.02  144.25
  -2  24  -3 1957.23  157.42
   2 -24   3 1673.70  211.49
  -2 -24  -3 1262.50  344.78
  -2 -24  -3 1676.56  132.68
   2  24   4   18.55   13.32
  -2  24  -4  104.52   35.65
   2  24   4   46.94   18.68
  -2 -24  -4  211.98   77.52
   2 -24   4   50.96  121.27
   2  24   5   21.92   16.91
  -2  24  -5  150.48   58.10
   2  24   5   45.53   17.79
  -2 -24  -5   29.73   36.90
   2 -24   5  209.24  143.27
   2  24   6  378.84   94.19
  -2  24  -6  845.33  157.89
  -2 -24  -6  719.47  154.00
  -2  24  -7  762.33  155.69
   2 -24   7  547.58  203.17
  -2  24  -8   21.90   48.78
   2 -24   8  244.16  121.91
  -2  24  -9  204.63  119.81
   2  26  -9  134.51   54.73
   2  26  -8  913.49  152.04
  -2 -26   8  644.02  308.35
   2 -26  -8  645.08  212.41
   2  26  -7   24.08   36.10
  -2 -26   7  340.21  171.99
   2 -26  -7  155.50   59.90
   2  26  -6  176.25   44.07
  -2 -26   6  361.01  186.14
   2 -26  -6  102.27   41.28
  -2  26   5  150.12   61.06
   2  26  -5  459.26   81.64
  -2 -26   5  490.25  191.69
   2 -26  -5  299.17   90.64
  -2  26   4 1170.19  142.79
   2  26  -4 1142.13  230.63
  -2 -26   4 1479.53  239.71
   2 -26  -4  600.36  171.67
   2  26  -3   46.89   27.18
  -2  26   3   48.12   19.88
   2 -26  -3   26.95   16.60
  -2 -26   3  263.36   87.25
   2 -26  -3  124.58   76.45
  -2  26   2 2220.34  219.56
   2  26  -2 2367.62  200.21
   2 -26  -2 1931.70  164.19
  -2 -26   2 1889.11  247.90
   2 -26  -2 2056.31  491.03
  -2  26   1  365.03   62.45
   2  26  -1  399.85   87.69
  -2 -26   1  365.22  100.08
   2 -26  -1  279.87  106.19
   2  26   0  842.69  181.31
  -2  26   0  846.58  166.88
  -2 -26   0 1164.23  208.65
   2 -26   0  654.25  143.94
   2  26   1  226.76   59.78
  -2  26  -1  332.92   78.19
   2  26   1  202.95   40.66
   2 -26   1  198.79   89.98
  -2 -26  -1  414.31  138.35
   2  26   2 1620.19  139.09
  -2  26  -2 1736.10  154.74
   2 -26   2 1377.44  222.53
  -2 -26  -2 1592.17  289.84
   2  26   3  700.51  150.08
  -2  26  -3  738.88  132.03
   2  26   3  342.81   65.08
  -2 -26  -3  501.63  155.80
   2 -26   3  656.44  225.40
   2  26   4  562.67  157.72
  -2  26  -4  949.79  182.48
   2 -26   4  951.17  250.68
  -2 -26  -4  680.92  193.28
   2  26   5  -20.33   22.25
   2 -26   5  136.44  124.77
  -2 -26  -5   80.40   55.70
   2  26   6   25.63   23.96
  -2  26  -6   92.14   41.28
   2 -26   6   57.36  119.27
  -2 -26  -6   58.81   25.88
  -2  26  -7  122.40   37.00
   2 -26   7   54.26  129.86
  -2  26  -8  597.38   68.70
   2 -26   8  481.42  158.76
  -2  26  -9  118.27   68.19
   2 -26   9  163.56  147.85
   2  28  -8  128.70   45.60
  -2 -28   8   61.75  148.39
   2  28  -7  579.17  111.39
  -2 -28   7  330.13  200.23
   2  28  -6  324.17   72.14
  -2 -28   6  132.06   88.33
   2  28  -5    1.46   26.78
  -2 -28   5  150.33   44.66
   2 -28  -5   27.00   27.30
  -2  28   4  128.59   49.79
   2  28  -4  171.34   50.03
  -2 -28   4  424.58  159.31
   2 -28  -4  237.72  104.62
  -2  28   3  953.15  194.81
   2  28  -3  952.96  180.84
   2 -28  -3  297.62  125.51
  -2 -28   3  810.37  196.74
   2 -28  -3 1145.74  239.85
  -2  28   2  276.23   82.89
   2  28  -2  324.60   76.12
  -2 -28   2  379.43  153.07
   2 -28  -2  233.51  121.49
  -2  28   1  280.59   64.48
   2  28  -1  274.13   72.38
  -2 -28   1   67.37  101.14
   2 -28  -1  440.80  132.81
   2  28   0   38.86   19.19
  -2  28   0   60.96   23.01
  -2 -28   0   -5.76   43.22
   2 -28   0  186.18   79.67
   2  28   1  271.75   70.28
  -2  28  -1  205.35   56.75
  -2 -28  -1  183.31   85.78
   2 -28   1  285.82   95.23
   2  28   2  476.51  134.62
  -2  28  -2  744.89  184.64
  -2 -28  -2  776.24  175.40
   2 -28   2  805.73  204.68
   2  28   3  324.53   93.15
  -2  28  -3  280.90   75.80
   2 -28   3  656.02  183.97
  -2 -28  -3  322.75   98.75
   2  28   4   14.98    7.44
  -2  28  -4   19.31   37.69
   2 -28   4  169.29  112.47
  -2 -28  -4   49.83   45.57
   2  28   5  213.39   68.03
  -2  28  -5  438.65   78.76
   2 -28   5  311.47  111.62
  -2 -28  -5  231.67   92.93
  -2  28  -6   80.72   60.20
   2 -28   6  250.41  130.41
  -2  28  -7   20.98   45.04
   2 -28   7  377.65  202.28
  -2  28  -8  199.63   70.28
   2 -28   8   63.42  110.56
   2  30  -8  233.87   94.27
  -2 -30   8  223.38  147.91
   2  30  -7   21.34   19.14
  -2 -30   7  -34.12  136.56
   2 -30  -7   45.84   16.65
   2  30  -6   87.54   25.07
  -2 -30   6  125.18  107.10
   2 -30  -6   42.94   35.84
   2  30  -5   -9.28   31.48
  -2 -30   5  141.84  129.08
  -2  30   4    2.36   12.41
   2  30  -4   45.16   17.59
  -2 -30   4  137.72  115.17
   2 -30  -4   58.78   68.38
   2  30  -3   54.29   26.08
  -2  30   3   30.19   15.45
  -2 -30   3   21.24   87.91
   2 -30  -3  208.59   98.61
   2  30  -2   65.20   16.15
  -2  30   2   88.51   31.28
  -2 -30   2   59.59   90.70
   2 -30  -2   95.48   74.13
  -2  30   1   33.19   10.44
   2  30  -1   44.94   17.00
  -2 -30   1  183.10  134.62
   2 -30  -1   62.51   73.56
  -2  30   0   87.79   25.92
   2  30   0   97.93   25.28
  -2 -30   0   38.57   72.65
   2 -30   0  271.16  126.65
   2  30   1   49.16   18.91
  -2  30  -1  157.62   67.57
  -2 -30  -1  295.14  122.56
   2 -30   1  257.21  100.03
   2  30   2  206.26   54.72
  -2  30  -2  256.87   63.81
   2 -30   2  530.45  157.66
  -2 -30  -2  361.56  111.54
   2  30   3   52.61   14.85
  -2  30  -3  221.75   47.96
   2 -30   3  -10.62  103.00
  -2 -30  -3  124.83   45.92
   2  30   4  356.42   59.68
  -2  30  -4  630.86  139.14
   2 -30   4  718.30  202.00
   2  30   5   23.29   32.27
  -2  30  -5   33.02   28.85
   2 -30   5  118.26  122.74
  -2  30  -6  212.23   58.73
   2 -30   6  295.65  133.45
   2 -30   7   93.48  121.68
   2  32  -7   73.53   36.80
  -2 -32   7  223.72  147.72
   2 -32  -7   50.56   23.09
   2  32  -6   91.42   43.83
  -2 -32   6  376.94  145.45
   2  32  -5   66.16   36.39
  -2 -32   5  161.52  118.71
   2 -32  -5  -22.47   78.87
   2  32  -4  129.65   42.48
  -2 -32   4   95.29  120.39
   2 -32  -4  333.32  143.38
  -2  32   3   27.12    9.08
   2  32  -3   52.63   17.84
  -2 -32   3   74.12   99.22
   2 -32  -3  -25.98   84.49
   2  32  -2   74.17   39.85
  -2  32   2   73.61   26.24
  -2 -32   2  227.04  124.78
   2 -32  -2   84.02   82.08
  -2  32   1  163.42   44.33
   2  32  -1  125.25   23.53
  -2 -32   1  376.59  109.38
   2 -32  -1  190.29   64.29
  -2  32   0  797.34  126.10
   2  32   0  917.33  187.82
  -2 -32   0  569.50  159.16
   2 -32   0  458.55   83.96
   2  32   1  340.41   75.40
  -2  32  -1  374.60  113.05
   2 -32   1  535.75  136.19
  -2 -32  -1  266.81  121.20
   2  32   2   62.46   16.50
  -2  32  -2  112.06   53.46
   2 -32   2  170.61  128.09
  -2 -32  -2   86.73   82.12
   2  32   3 1239.56  174.31
  -2  32  -3 1132.83  250.20
  -2 -32  -3 1271.99  196.12
   2 -32   3 1295.21  236.09
   2  32   4   25.82   15.22
  -2  32  -4   -0.24   34.12
   2 -32   4  281.09  146.43
  -2  32  -5   62.98   42.61
   2 -32   5  210.05  179.44
  -2  32  -6  168.99   44.79
   2 -32   6  235.56  132.22
   2  34  -6   69.49   30.82
  -2 -34   6  553.53  221.67
   2 -34  -6  -51.73   68.91
   2  34  -5  595.83  252.09
  -2 -34   5  560.20  196.63
   2  34  -4   40.99   23.41
  -2 -34   4  200.99  123.35
   2 -34  -4   61.47   73.45
  -2  34   3   91.96   23.02
   2  34  -3   97.63   31.25
  -2 -34   3  321.92  126.00
   2 -34  -3  206.80   93.87
   2  34  -2  246.86  107.97
  -2  34   2  294.58  109.67
  -2 -34   2  278.81  153.04
   2 -34  -2  220.76  118.57
  -2  34   1  296.10  116.83
   2  34  -1  293.22  116.13
  -2 -34   1 1050.00  185.96
   2 -34  -1  417.22  123.57
  -2  34   0   25.67   23.77
   2  34   0   11.82   13.89
  -2 -34   0   73.22  100.72
   2 -34   0  -32.72   83.73
   2  34   1  422.96  121.34
  -2  34  -1  450.49   82.32
   2 -34   1  448.05  187.30
   2  34   2  215.55   67.41
  -2  34  -2  125.10   58.12
  -2 -34  -2  250.26  155.39
   2 -34   2  158.34  121.10
   2  34   3  160.90   43.59
  -2  34  -3  107.86   40.88
   2 -34   3  672.39  207.22
   2  34   4  272.72  113.68
  -2  34  -4  808.77  142.65
   2 -34   4  597.23  147.19
  -2  34  -5  282.62  114.91
   2 -34   5  395.83  213.58
  -2  34  -6  370.35   67.43
   2  36  -5   74.23   32.65
  -2 -36   5  204.27  133.25
   2 -36  -5   89.60   46.95
   2  36  -4   67.38   30.45
  -2 -36   4  204.78  134.64
   2 -36  -4  290.29  120.96
   2  36  -3   52.11   20.50
  -2 -36   3   -2.13   58.42
   2 -36  -3  122.86   85.52
   2  36  -2   45.74   20.85
  -2 -36   2  244.91  122.44
   2 -36  -2  155.22   60.52
  -2  36   1  102.07   28.17
   2  36  -1   53.93   27.24
  -2 -36   1  -24.04   96.03
   2 -36  -1  121.53   53.70
   2  36   0  639.36  154.16
  -2  36   0  522.73  171.42
  -2 -36   0  939.12  234.95
   2 -36   0  653.58  193.88
   2  36   1   34.97   18.66
  -2  36  -1   58.40   29.21
   2 -36   1  187.75  156.81
  -2 -36  -1  141.55  121.12
  -2  36  -2 1019.61  166.68
  -2 -36  -2  478.64  242.46
   2 -36   2 1069.19  251.70
   2  36   3  122.35   35.38
  -2  36  -3  149.00   53.38
   2 -36   3  169.10  104.40
  -2 -36  -3  173.84  133.53
  -2  36  -4  235.57   92.42
   2 -36   4  403.32  166.85
   2  38  -3   59.09   26.79
  -2 -38   3  286.21  129.96
  -2  38   2   59.22   19.15
   2  38  -2   56.16   23.39
  -2 -38   2  216.15  118.58
   2 -38  -2  165.85  119.47
   2  38  -1   20.50   14.23
  -2  38   1   -8.36   18.68
   2 -38  -1  172.90  108.67
  -2 -38   1   66.28   96.97
  -2  38   0  110.68   49.48
   2  38   0  195.90   94.69
   2 -38   0  192.32  103.88
  -2 -38   0    7.08   83.16
   2  38   1  260.57  101.06
  -2  38  -1  210.16   83.59
   2 -38   1  433.68  208.19
  -2 -38  -1  274.07  120.07
   2  38   2   40.49   15.53
  -2  38  -2   68.71   31.31
   2 -38   2  300.07  169.19
  -2 -38  -2   81.99   78.01
   2  38   3   67.61   24.04
  -2  38  -3  145.36   39.13
   2 -38   3  163.27  123.42
   3   1 -12   65.70   74.16
   3  -1 -12   17.82   29.08
   3   1 -11   61.60   50.19
   3  -1 -11   36.27   36.47
   3   1 -10   54.70   32.66
   3  -1 -10   36.56   15.09
   3  -1 -10   59.50   29.51
   3   1  -9 4495.30  536.06
   3   1  -9 2714.98  567.09
   3   1  -9 5629.09  681.55
   3  -1  -9 4224.41  519.74
   3  -1  -9 5974.09  716.35
   3  -1  -9 4395.17  522.99
   3   1  -8 1790.93  143.51
   3   1  -8 1052.26  291.56
   3   1  -8 2398.46  222.40
   3  -1  -8 1218.48  287.76
   3  -1  -8 2192.90  190.24
   3  -1  -8 1626.51  123.78
   3   1  -7 4620.69  251.63
   3   1  -7 3718.58  200.75
   3  -1  -7 3894.77  201.57
   3  -1  -7 4707.39  274.09
   3  -1  -7 3837.42  231.17
   3   1  -6   78.78   28.24
   3   1  -6   90.14   16.00
   3   1  -6  293.72   75.95
   3  -1  -6  154.72   29.40
   3  -1  -6  197.65   56.13
   3  -1  -6  179.09   37.07
  -3  -1   6  114.84   24.62
   3   1  -5 1218.44  248.81
   3   1  -5 1166.60  104.68
  -3   1   5 1256.19  112.29
   3   1  -5 1279.70  121.46
   3  -1  -5 1185.69  105.97
  -3  -1   5 1175.63  106.43
   3  -1  -5 1365.51  186.57
   3   1  -4  920.82   57.81
  -3   1   4  951.06   57.17
   3   1  -4  945.88   94.29
   3   1  -4  950.95   83.53
   3  -1  -4  943.31   55.72
  -3  -1   4  878.61   55.88
   3  -1  -4 1118.79   75.92
   3   1  -325514.74  628.32
   3   1  -326445.64  642.72
  -3   1   329113.18  706.80
  -3  -1   328670.03  697.89
   3  -1  -328660.25  695.05
   3  -1  -327702.07  680.79
  -3   1   213824.01  346.31
   3   1  -213891.90  341.73
  -3   1   214017.99  342.10
   3   1  -213646.20  340.30
   3  -1  -212146.39  297.53
   3  -1  -213385.04  332.97
  -3  -1   213721.28  336.01
  -3   1   118828.43  461.29
   3   1  -116702.70  408.82
  -3   1   117155.71  418.29
   3   1  -117969.20  440.15
  -3  -1   119771.39  482.08
   3  -1  -119375.77  475.35
   3  -1  -118328.18  451.57
  -3  -1   118849.45  461.82
  -3   1   0   99.70   18.83
   3   1   0   25.95   23.44
  -3   1   0   64.12   13.38
   3   1   0   99.36   18.60
   3  -1   0   69.61   36.66
   3  -1   0   82.23   16.36
  -3  -1   0  103.27   15.47
  -3  -1   0   64.75    9.93
   3   1   1   89.41   18.05
   3   1   1   57.92   36.24
  -3   1  -1   75.65   39.62
  -3   1  -1   98.86   22.59
   3  -1   1   -0.05   44.85
   3  -1   1   57.19   20.10
  -3  -1  -1   59.09   10.81
  -3  -1  -1   79.73   26.73
   3   1   2   36.77   47.74
  -3   1  -2  154.33   66.49
  -3   1  -2   99.45   29.36
   3   1   2  129.16   39.59
   3  -1   2  105.59   42.64
   3  -1   2  116.26   44.35
  -3  -1  -2   93.99   18.27
  -3  -1  -2   31.84   24.33
  -3   1  -312093.66  406.24
  -3   1  -312069.27  428.95
   3   1   311084.03  375.45
   3  -1   311091.69  381.68
   3  -1   312243.07  443.35
  -3  -1  -312408.87  411.61
   3   1   4  522.05  124.30
   3   1   4  456.44  111.61
  -3   1  -4  475.77   85.90
  -3   1  -4  454.70   99.31
  -3  -1  -4  421.55   79.55
   3  -1   4  430.35   68.67
   3  -1   4  320.64   86.46
  -3  -1  -4  413.51   81.12
  -3   1  -513494.76  599.78
   3   1   513832.20  624.34
  -3   1  -512792.63  504.41
   3   1   513883.04  565.80
   3  -1   513515.07  564.19
  -3  -1  -516007.37 1453.14
   3  -1   513754.79  566.08
  -3  -1  -511763.83  462.86
  -3   1  -6   76.62   40.19
   3   1   6   25.01   70.81
  -3   1  -6   23.56   17.22
  -3  -1  -6  153.78   57.27
   3  -1   6   11.01   63.87
  -3  -1  -6   70.19   28.28
   3  -1   6   30.58   34.17
   3   1   7 1609.96  263.44
  -3   1  -7 1400.21  251.51
  -3   1  -7 2046.30  124.95
   3  -1   7 2065.66  169.30
  -3  -1  -7 2198.13  166.46
  -3  -1  -7 1468.32  343.46
  -3   1  -8  391.95   62.55
  -3   1  -8  126.92   52.82
  -3  -1  -8  238.84   29.95
  -3  -1  -8  135.93   52.63
  -3   1  -9 2386.03  387.46
  -3  -1  -9 2271.63  381.92
  -3   1 -10  121.02   35.38
  -3  -1 -10   57.55   32.91
  -3   1 -11  810.17  146.63
  -3   1 -11  638.48  135.27
  -3  -1 -11  702.19  133.62
  -3  -1 -11  367.71  171.01
   3   3 -12 2195.72  344.05
   3   3 -11  242.46  100.44
   3  -3 -11  162.38   55.50
   3   3 -10  968.45  133.83
   3  -3 -10  740.80  143.61
   3   3  -9 1076.50  264.80
   3   3  -9  988.10  190.48
   3  -3  -9  999.67  183.74
   3  -3  -9 1021.94  196.03
   3  -3  -9  320.78  112.94
   3   3  -8  104.32   40.58
   3   3  -8  139.03   29.26
   3   3  -8   70.89   34.19
   3  -3  -8   80.42   30.81
   3  -3  -8   76.22   19.38
   3  -3  -8  223.54   48.36
   3   3  -7  899.13  153.22
   3  -3  -7  763.27   88.14
   3  -3  -7  554.78  142.69
  -3  -3   7  679.09  104.83
   3  -3  -7  995.67  167.32
   3   3  -6 2977.06  327.48
   3   3  -6 3137.89  127.18
   3  -3  -6 3268.61  127.97
  -3  -3   6 3406.13  146.12
   3  -3  -6 3167.81  228.27
   3  -3  -6 3423.45  149.01
   3   3  -5  935.48  180.74
   3   3  -5  663.61   64.48
  -3   3   5  720.39   64.91
  -3  -3   5  716.73  113.03
   3  -3  -5  640.97   59.68
   3  -3  -5  731.07   74.98
   3   3  -4 6137.91  289.90
   3   3  -4 6119.26  202.91
  -3   3   4 6786.77  220.66
  -3  -3   4 5890.78  197.67
   3  -3  -4 6558.39  212.07
   3  -3  -4 5977.76  204.04
   3   3  -3 2688.19  224.27
  -3   3   3 2231.70   58.95
   3   3  -3 2345.23   67.57
  -3   3   3 2248.46   70.80
  -3  -3   3 2456.07   75.19
   3  -3  -3 2381.58   74.71
   3  -3  -3 2065.54   56.38
  -3   3   2 5344.78  133.00
   3   3  -2 5046.53  128.63
  -3   3   2 5053.08  133.16
   3  -3  -2 4839.40  125.90
  -3  -3   2 5130.56  130.97
   3  -3  -2 5289.09  144.69
   3   3  -1  621.38   55.64
  -3   3   1  570.59   56.71
   3   3  -1  546.63   47.12
  -3   3   1  595.69   48.94
   3  -3  -1  813.61   81.65
   3  -3  -1  481.70   41.61
  -3  -3   1  641.61   50.61
  -3   3   014239.64  367.76
   3   3   011889.47  291.21
  -3   3   012373.03  304.65
   3  -3   011804.21  291.39
  -3  -3   011879.16  293.62
   3  -3   011283.12  298.48
  -3   3  -1   28.74   10.94
  -3   3  -1   16.34   40.15
   3   3   1   54.44   27.34
   3   3   1    8.86    4.80
  -3  -3  -1   23.31   22.92
   3  -3   1   30.82   11.75
   3  -3   1  112.62   69.99
  -3  -3  -1   19.99    9.19
  -3   3  -221392.68  552.33
   3   3   223017.19  564.71
   3  -3   225332.72  667.60
  -3  -3  -221637.42  537.21
   3  -3   221921.33  558.88
   3   3   3 8420.74  282.95
   3   3   3 8016.29  288.61
  -3   3  -3 7404.49  273.36
  -3   3  -310167.55  350.22
   3  -3   3 9601.18  663.13
   3  -3   3 8558.58  309.31
  -3  -3  -3 8871.98  297.66
  -3  -3  -3 6908.31  235.76
   3   3   4 7040.84  248.33
  -3   3  -4 6385.65  320.60
   3   3   4 5866.13  224.94
  -3   3  -4 7311.29  266.13
  -3  -3  -4 5613.71  204.95
   3  -3   4 6841.34  268.12
   3  -3   4 7530.44  351.63
  -3  -3  -4 6375.61  222.62
  -3   3  -5  801.30  138.96
   3   3   5 1073.54  161.15
  -3   3  -5  767.02  117.42
  -3  -3  -5  601.20  111.20
   3  -3   5  882.25  129.91
  -3  -3  -5  942.37  206.90
   3  -3   5 1057.82  116.40
   3   3   6 1834.73  361.28
  -3   3  -6 1248.07  253.48
  -3   3  -6 1454.90  331.87
  -3   3  -6 1821.95  112.59
   3  -3   6 1533.72  361.97
  -3  -3  -6 1983.87  142.14
  -3  -3  -6 2216.33  154.34
   3   3   7  -72.59   63.52
  -3   3  -7   77.49   56.08
  -3   3  -7   12.18   24.71
   3  -3   7  157.76   79.09
  -3  -3  -7   85.99   64.29
  -3  -3  -7    2.35   10.21
  -3   3  -8 1530.25  135.55
  -3  -3  -8 1441.07   49.86
  -3   3  -9  776.02  153.91
  -3  -3  -9  903.79  116.07
  -3  -3  -9  650.06  156.49
  -3   3 -10 1346.13  145.52
  -3  -3 -10 1156.01  187.05
  -3  -3 -10  861.63  101.64
  -3   3 -11  131.85   35.48
  -3  -3 -11  165.18   37.58
   3   5 -12   54.41   44.55
   3  -5 -12   25.70   19.38
   3   5 -11 1278.71  406.71
   3  -5 -11 1108.57  216.86
   3   5 -10  115.40   36.60
   3   5 -10  179.40   56.23
   3  -5 -10   37.34   24.14
   3   5  -9  991.04  227.69
   3  -5  -9 1039.73  190.20
   3  -5  -9  337.44  115.61
   3  -5  -9 1006.65  190.13
   3   5  -8  225.40   55.84
   3  -5  -8  148.20   38.78
  -3  -5   8  276.31   48.08
   3  -5  -8  190.45   48.46
   3   5  -7 5090.49  270.48
   3  -5  -7 4716.16  239.73
   3  -5  -7 3417.77  182.48
  -3  -5   7 4893.31  255.92
   3  -5  -7 4650.24  257.85
   3   5  -6  218.58   39.44
   3  -5  -6  121.58   24.52
   3  -5  -6  129.98   26.03
  -3  -5   6  147.68   34.47
   3  -5  -6  103.64   24.16
   3   5  -5 5777.74  305.24
   3   5  -5 6417.92  249.52
   3  -5  -5 6693.90  251.94
  -3  -5   5 6684.88  260.18
   3  -5  -5 6296.03  246.92
   3  -5  -5 6451.70  254.86
   3   5  -4  956.47  210.32
   3   5  -4 1107.57   78.77
  -3   5   4 1169.11  107.72
  -3   5   4 1133.58   64.63
   3  -5  -4 1268.05   73.82
   3  -5  -4 1082.85   71.55
  -3  -5   4  997.39   66.71
   3   5  -3 1114.66  259.66
  -3   5   3  886.87   65.90
   3   5  -3  908.02   76.08
  -3   5   3  961.76   77.74
  -3  -5   3 1027.94   85.35
   3  -5  -3 1003.02   80.49
   3  -5  -3 1307.18  125.17
   3   5  -2  324.47   90.11
  -3   5   2  370.48   58.33
  -3   5   2  262.91   27.92
   3   5  -2  320.18   44.55
   3  -5  -2  322.02   48.81
   3  -5  -2  272.72   46.47
  -3  -5   2  330.82   55.66
   3   5  -1 9472.91  261.66
  -3   5   111121.76  295.25
   3   5  -110449.85  260.33
  -3  -5   110044.37  249.94
   3  -5  -111910.75  319.23
   3  -5  -1 9582.73  240.28
   3   5   0   33.40   30.69
  -3   5   0  -12.60   23.13
   3   5   0   36.27   17.73
  -3   5   0   29.75   15.10
  -3  -5   0   35.72   11.67
   3  -5   0   34.84   16.28
   3  -5   0  166.10   83.68
   3   5   114168.57  343.01
  -3   5  -111694.46  312.71
   3   5   114708.09  365.92
  -3  -5  -113913.35  343.36
   3  -5   115149.36  427.31
  -3   5  -2 2464.93   76.09
  -3   5  -2 2813.75  177.93
   3   5   2 2387.85   80.03
   3  -5   2 3347.38  123.27
   3  -5   2 3503.25  287.90
   3   5   3 4912.62  192.33
  -3   5  -3 5707.71  240.40
  -3   5  -3 5183.39  199.03
  -3  -5  -3 4521.44  159.19
   3  -5   3 3787.18  280.65
  -3  -5  -3 4609.58  156.37
   3  -5   3 4778.85  197.51
   3   5   4 1272.90  247.85
  -3   5  -4 1565.14  286.09
   3  -5   4 1161.98  147.94
  -3  -5  -4 1144.90  108.46
   3  -5   4 1392.34  153.76
  -3  -5  -4 1384.60  137.28
   3   5   5 2779.69  164.40
  -3   5  -5 2422.06  131.61
  -3   5  -5 2380.57  126.51
  -3   5  -5 2775.64  118.71
  -3  -5  -5 2988.79  156.83
   3  -5   5 2504.73  141.47
  -3  -5  -5 2391.74  107.71
   3   5   6 1191.33  224.62
  -3   5  -6  505.30  128.40
  -3   5  -6 1406.98  295.93
  -3   5  -6  699.06  178.16
  -3  -5  -6 1297.77  168.97
   3  -5   6 1530.77  448.83
  -3  -5  -6 1162.35  140.94
   3   5   7 4359.90  380.62
  -3   5  -7 3695.44  239.18
  -3   5  -7 5090.98  294.07
   3  -5   7 4927.94  322.76
  -3  -5  -7 4715.49  287.66
  -3  -5  -7 3313.85  196.95
  -3  -5  -7 4558.16  261.99
   3   5   8  184.02   86.74
  -3   5  -8   23.51   25.94
   3  -5   8   68.60   79.34
  -3  -5  -8  -17.36   36.60
  -3  -5  -8   -8.62   15.16
  -3   5  -9 1921.49  314.95
  -3  -5  -9 1695.93  276.78
  -3  -5  -9 1763.39  287.33
  -3   5 -10  144.25   40.14
  -3  -5 -10  139.74   47.03
  -3  -5 -10  128.77   27.20
  -3   5 -11  145.19   37.36
   3   7 -12   22.68   37.91
   3  -7 -12   39.59   32.31
   3   7 -11 1680.07  317.61
   3   7 -11 2384.47  455.34
   3  -7 -11 2114.87  399.13
   3   7 -10   31.68   24.66
   3  -7 -10   13.41   25.75
   3   7  -9 1043.65  244.13
   3  -7  -9  600.21  109.61
   3  -7  -9 1254.47  188.41
   3   7  -8   12.78   29.37
   3  -7  -8   31.21    4.96
   3  -7  -8    7.61    3.89
   3  -7  -8   78.96   39.64
   3   7  -7 4377.45  252.61
  -3  -7   7 4178.52  240.81
   3  -7  -7 4152.60  241.54
   3   7  -6   39.81   25.42
  -3  -7   6   53.38   18.88
   3  -7  -6   47.89   15.43
   3   7  -511181.75  427.89
   3   7  -510733.68  453.97
  -3   7   511626.44  447.44
  -3  -7   511242.20  435.73
   3  -7  -511912.05  462.33
   3   7  -4  773.61   72.92
   3   7  -4  979.98  225.90
  -3   7   4  955.31  134.94
  -3  -7   4  782.58   74.37
   3  -7  -4  844.45   81.65
   3   7  -3 4680.50  159.63
  -3   7   3 4759.45  152.81
   3   7  -3 4791.23  203.71
  -3   7   3 4941.68  181.61
  -3  -7   3 4747.96  162.52
  -3  -7   3 4580.54  208.88
   3  -7  -3 5132.03  175.67
   3   7  -2 2458.51  107.03
  -3   7   2 3006.99  101.66
   3   7  -2 2331.11   67.14
  -3   7   2 2401.66   71.45
   3  -7  -2 2498.71  123.23
  -3  -7   2 2528.38  126.35
   3  -7  -2 1981.22   67.56
  -3  -7   2 2412.99   71.70
   3   7  -117244.20  452.76
  -3   7   114951.94  384.33
  -3   7   117867.98  439.77
   3   7  -117571.89  431.60
   3  -7  -117401.01  454.58
  -3  -7   117699.64  463.64
  -3  -7   117558.34  431.74
   3  -7  -117553.37  432.12
   3   7   0  343.73   58.88
  -3   7   0  260.00   49.98
  -3   7   0  292.74   57.14
   3   7   0  240.72   65.73
   3  -7   0  220.02   78.32
  -3  -7   0  325.63   57.66
   3  -7   0  274.81   48.67
  -3  -7   0  250.95   44.23
   3   7   113910.17  345.09
   3   7   113266.23  330.01
   3  -7   114921.71  423.40
  -3   7  -2 1032.91  121.38
  -3   7  -2  651.99   57.00
   3   7   2  894.41   94.36
  -3  -7  -2  829.20   65.84
   3  -7   2  972.02  218.59
   3  -7   2  916.22  126.45
  -3   7  -3 5686.29  245.13
  -3   7  -3 5834.60  199.21
  -3   7  -3 6906.48  261.42
   3  -7   3 6179.03  251.38
  -3   7  -4 4260.31  294.55
   3   7   4 3121.00  181.53
  -3   7  -4 3794.51  164.72
  -3   7  -4 3353.69  123.20
  -3  -7  -4 3472.70  127.19
   3  -7   4 3344.57  168.78
  -3  -7  -4 4413.17  158.74
  -3  -7  -4 3777.42  125.11
  -3   7  -5 7827.71  571.14
   3   7   5 5549.73  303.87
  -3   7  -5 6269.33  276.13
  -3   7  -5 6579.01  264.20
  -3  -7  -5 6533.55  265.90
   3  -7   5 5661.63  271.26
  -3  -7  -5 6821.61  271.64
  -3  -7  -5 6683.68  257.13
   3   7   6  166.14   83.44
  -3   7  -6  225.01   78.42
  -3   7  -6  231.07   52.98
   3  -7   6  -11.21   61.81
  -3  -7  -6   96.86   43.35
  -3  -7  -6   97.12   30.61
   3   7   7 9760.32  475.82
  -3   7  -7 9733.23  120.52
  -3  -7  -7 8950.36  663.64
   3  -7   7 8893.17  690.40
  -3  -7  -7 9473.76  161.03
  -3  -7  -710564.92   90.79
   3   7   8   55.56   47.99
  -3   7  -8   40.34   32.72
   3  -7   8   -8.27   66.22
  -3  -7  -8   61.85   48.63
  -3  -7  -8   16.08   17.23
  -3   7  -9  384.08  116.76
  -3  -7  -9  328.02  135.79
  -3  -7  -9  298.97   71.76
  -3   7 -10   17.86   36.09
  -3  -7 -10   32.68   19.63
  -3   7 -11 1182.48  243.98
   3   9 -12   58.23   68.86
   3  -9 -12  -15.70   27.39
   3  -9 -11 2629.40  410.39
   3   9 -10  467.32  118.01
   3  -9 -10  457.14  136.63
   3   9  -9  818.68  157.36
   3  -9  -9  790.00  170.61
   3   9  -8 2426.43  206.34
   3  -9  -8 2390.68  203.91
   3   9  -7 3565.48  225.47
   3  -9  -7 3583.58  211.04
   3   9  -6  217.62   81.36
  -3  -9   6  187.50   40.01
   3  -9  -6  126.19   23.76
   3   9  -512096.55  463.96
  -3   9   511713.22  454.34
   3   9  -511866.73  500.70
  -3  -9   5 9733.94  440.62
   3  -9  -513103.03  502.55
  -3  -9   511902.07  456.99
   3   9  -4 3224.72  119.08
  -3   9   4 3400.28  125.70
   3   9  -4 3222.64  233.10
  -3  -9   4 2637.77  152.45
   3  -9  -4 3238.25  118.15
  -3  -9   4 2986.38  112.51
  -3   9   3 3307.40  108.55
   3   9  -3 2895.16  104.16
  -3   9   3 2919.96  113.50
   3   9  -3 2926.57  142.80
  -3  -9   3 3119.44  254.61
   3  -9  -3 2811.85  101.75
  -3  -9   3 2961.51  108.52
  -3   9   210937.25  361.62
   3   9  -212684.12  412.40
  -3   9   212623.42  405.88
   3   9  -212058.65  423.24
  -3   9   213945.29  453.60
  -3  -9   213619.04  444.24
  -3  -9   212127.84  487.43
   3  -9  -212753.20  416.07
  -3   9   1 4166.99  155.61
   3   9  -1 3567.20  129.18
   3   9  -1 3244.66   89.12
  -3   9   1 3440.83   91.67
  -3   9   1 3586.76  101.88
  -3  -9   1 3274.33   91.77
  -3  -9   1 3404.68  194.89
  -3   9   0  410.28   72.60
   3   9   0  353.98   55.27
  -3   9   0  252.58   28.27
   3   9   0  318.22   56.57
  -3   9   0  380.85   69.48
  -3  -9   0  336.55   39.79
  -3  -9   0  482.85   73.70
   3  -9   0  398.41   69.57
  -3   9  -127828.58  728.10
   3   9   125386.07  621.90
  -3   9  -128046.31  693.33
  -3   9  -125115.94  616.54
   3   9   128146.88  694.58
  -3  -9  -127664.34  683.89
  -3  -9  -129284.24  714.54
  -3   9  -2 2414.54  387.83
   3   9   2 1675.93  121.66
  -3   9  -2 1189.79   79.07
  -3   9  -2 1777.53  160.07
  -3  -9  -2 1892.27   69.40
   3  -9   2 2201.21  312.36
  -3  -9  -2 1843.50   67.93
  -3   9  -3 1406.19  272.24
   3   9   3 1048.11  107.40
  -3   9  -3 1166.45  108.73
  -3   9  -3 1565.03  156.69
  -3  -9  -3 1288.84  115.86
   3  -9   3 1341.50  181.03
  -3   9  -4 3977.93  520.56
   3   9   4 4780.02  335.04
  -3   9  -4 3629.56  177.01
  -3   9  -4 3818.31  160.65
   3  -9   4 3505.46  196.26
  -3  -9  -4 3225.75  133.30
  -3  -9  -4 3233.38  131.00
  -3  -9  -4 3707.02  140.73
  -3   9  -5 1366.44  168.99
   3   9   5 1009.93  159.04
  -3   9  -5  851.67  226.67
  -3   9  -5 1043.99  103.99
   3  -9   5 1063.02  144.51
  -3  -9  -5  872.03   92.18
  -3  -9  -5 1249.51  177.62
  -3  -9  -5 1132.33  111.32
   3   9   6  830.70  130.95
  -3   9  -6  597.12   79.44
  -3  -9  -6  536.47   97.57
   3  -9   6  458.44  110.32
  -3  -9  -6  441.11   52.91
   3   9   7 3751.16  533.26
  -3   9  -7 3924.98  299.97
  -3  -9  -7 4177.01  315.90
   3  -9   7 4535.52  380.12
  -3  -9  -7 3439.34  391.39
  -3  -9  -7 3823.13  284.09
   3   9   8  115.84   61.10
  -3   9  -8  175.29   37.39
  -3  -9  -8   74.12   29.19
   3  -9   8  145.83   65.08
  -3  -9  -8   57.97   43.00
  -3  -9  -8  118.62   22.29
  -3   9  -9   62.93   27.09
  -3  -9  -9   96.84   28.95
   3  -9   9  178.05   98.55
  -3  -9  -9   23.64   11.44
  -3   9 -10  581.02   57.19
   3  -9  10  407.99  134.26
  -3   9 -11  176.45   63.63
   3  11 -11  334.36  123.98
   3 -11 -11  374.58  107.64
   3  11 -10   60.56   28.31
   3 -11 -10   49.13   24.99
   3  11  -9 1289.65  192.64
   3 -11  -9 1111.31  141.61
   3  11  -8 1716.99  284.88
   3 -11  -8 1707.53  246.70
   3  11  -7 5235.06  392.87
   3 -11  -7 4883.44  368.26
   3  11  -6 5526.35  291.15
  -3  11   6 4674.80  248.15
   3 -11  -6 5282.67  277.15
  -3 -11   6 5654.63  352.67
   3  11  -5 7511.23  297.05
  -3  11   5 8173.87  321.66
  -3 -11   5 7979.53  314.20
   3 -11  -5 8379.27  327.99
  -3 -11   5 7404.33  425.40
   3  11  -4  214.69   30.43
  -3  11   4  244.62   33.08
  -3 -11   4  236.07   30.95
   3 -11  -4  252.26   41.40
  -3 -11   4  447.28   93.81
  -3  11   3 4308.49  147.88
   3  11  -3 4097.11  144.40
  -3  11   3 4480.95  146.93
  -3  11   3 4560.77  179.73
   3  11  -3 4699.79  206.38
  -3 -11   3 4115.78  318.36
   3 -11  -3 4399.61  153.18
  -3 -11   3 4146.50  148.22
  -3  11   2  931.91  131.28
   3  11  -2  677.36   71.29
  -3  11   2  637.66   52.98
   3  11  -2 1005.50  163.39
  -3  11   2  775.53   85.51
  -3 -11   2  823.67   81.18
  -3 -11   2  772.06  128.51
   3 -11  -2  627.74   46.12
  -3  11   1 1644.58  126.75
   3  11  -1 1442.42  115.52
   3  11  -1 1237.43   80.36
  -3  11   1 1284.21   87.41
  -3  11   1 1346.63   90.39
  -3 -11   1 1377.19  212.78
   3 -11  -1 1557.40  101.40
  -3 -11   1 1253.41   77.46
  -3  11   0   60.66   49.80
   3  11   0   16.46   10.65
  -3  11   0   31.56   22.33
   3  11   0   50.04   24.29
  -3  11   0   42.15   18.78
  -3 -11   0   12.51   10.48
  -3 -11   0   -1.44   39.33
   3 -11   0   39.24   25.39
  -3  11  -1 9808.12  412.04
   3  11   1 9561.62  314.30
   3  11   112067.19  401.93
  -3  11  -1 9834.11  324.72
  -3  11  -1 9938.23  332.74
  -3 -11  -1 9468.63  322.84
  -3 -11  -1 9881.51  324.04
   3 -11   110793.06  395.86
  -3  11  -2 9109.33  391.64
   3  11   2 8803.97  282.80
  -3  11  -2 8801.85  295.39
  -3 -11  -2 8477.79  283.46
   3 -11   2 7859.16  311.21
  -3 -11  -2 9204.81  301.35
  -3  11  -3 2457.15  388.30
   3  11   3 2535.50  104.55
  -3  11  -3 2803.72  107.29
  -3  11  -3 3034.26  149.43
  -3 -11  -3 2668.83   95.50
  -3 -11  -3 2445.52  124.74
   3 -11   3 2028.18  168.31
  -3  11  -4  163.62   64.61
   3  11   4  114.68   28.29
  -3  11  -4  294.60   67.74
  -3  11  -4  284.84   52.24
  -3 -11  -4  155.93   22.16
   3 -11   4  139.57   70.19
  -3 -11  -4  196.95   32.80
  -3 -11  -4  225.44   27.60
   3  11   5 2815.61  332.96
  -3  11  -5 1708.55  381.64
  -3  11  -5 2410.78  175.12
  -3 -11  -5 2363.30  145.60
   3 -11   5 2119.54  175.44
  -3 -11  -5 2358.43  139.47
  -3 -11  -5 2463.13  139.48
   3  11   6  876.28  155.29
  -3  11  -6 1058.40  163.99
   3 -11   6  921.25  243.16
  -3 -11  -6  955.30  124.51
  -3 -11  -6  908.04  113.53
   3  11   7  611.46  146.69
  -3  11  -7  767.89  146.69
  -3 -11  -7  338.66   68.52
   3 -11   7  602.16  141.12
  -3 -11  -7  534.65   83.57
  -3 -11  -7  400.51   76.16
   3  11   8  617.95  173.40
  -3  11  -8  512.94  169.08
  -3 -11  -8  211.39   61.18
   3 -11   8  436.29  148.54
  -3 -11  -8  348.17  131.03
  -3 -11  -8  329.38  106.55
  -3  11  -9  424.02   69.51
   3 -11   9  417.78  103.83
  -3  11 -10   34.31   37.95
   3 -11  10   63.57   51.83
   3 -13 -11   64.95   31.72
   3  13 -10  155.19   53.32
   3 -13 -10   43.31   19.81
   3  13  -9 2754.22  315.63
   3 -13  -9 2568.83  314.57
   3  13  -8 1461.02  233.44
   3 -13  -8 1349.98  217.77
   3  13  -7 4896.58  371.86
  -3 -13   7 5359.65  455.56
   3 -13  -7 4698.96  352.42
   3  13  -6  205.45   51.42
  -3 -13   6  210.39  123.02
   3 -13  -6  144.99   42.04
   3  13  -5  537.59   72.62
  -3  13   5  511.24   75.55
   3 -13  -5  634.27  107.95
  -3 -13   5  635.92  152.09
   3  13  -4  213.90   34.11
  -3  13   4  198.61   28.15
   3  13  -4  228.28   57.16
  -3 -13   4  347.53   82.70
   3 -13  -4  235.87   53.55
  -3 -13   4  161.48   27.50
  -3  13   313867.85  462.89
   3  13  -311298.77  374.00
  -3  13   312708.25  410.57
  -3  13   312315.59  407.19
   3  13  -312568.13  458.02
  -3 -13   311556.37  562.70
   3 -13  -311462.26  378.95
  -3 -13   311343.06  377.25
  -3  13   2 7269.88  264.04
   3  13  -2 7135.88  240.45
  -3  13   2 7334.43  246.31
  -3  13   2 7080.68  233.34
   3  13  -2 7374.62  282.91
  -3 -13   2 7222.22  285.29
  -3 -13   2 7820.18  268.30
  -3  13   112747.20  459.87
   3  13  -111276.31  369.78
  -3  13   112539.02  407.69
   3  13  -113144.78  457.16
  -3  13   111709.70  383.84
  -3 -13   113280.69  435.69
  -3 -13   111321.93  410.51
   3 -13  -112858.75  428.59
  -3  13   0  654.15  140.29
   3  13   0  535.96   47.09
  -3  13   0  567.71   55.93
   3  13   0  680.58   63.31
  -3  13   0  800.75   57.90
  -3 -13   0  541.25   39.12
  -3 -13   0  675.58  108.43
   3 -13   0  471.25   95.17
  -3  13  -1 4956.52  403.17
   3  13   1 4674.18  159.80
  -3  13  -1 4569.59  166.85
  -3  13  -1 4273.10  162.77
  -3 -13  -1 4950.66  188.72
   3 -13   1 4572.19  205.67
  -3 -13  -1 4349.03  148.59
  -3  13  -2   98.82   41.72
   3  13   2  126.51   23.34
  -3  13  -2  107.66   20.99
  -3  13  -2  183.24   40.38
   3  13   2   70.71   11.07
  -3 -13  -2  128.41   44.47
  -3 -13  -2  102.69   21.74
   3 -13   2  184.68   92.09
  -3  13  -3 2346.19  350.32
   3  13   3 2965.40  158.81
  -3  13  -3 1457.01  162.52
  -3  13  -3 2600.75  113.64
   3  13   3 2554.36   98.59
   3 -13   3 2330.21  292.02
  -3 -13  -3 2450.34   99.85
  -3 -13  -3 2319.50  114.53
   3  13   4 1537.89  200.81
  -3  13  -4 1915.78  120.88
  -3  13  -4 1801.20   89.12
   3 -13   4 1678.20  142.28
  -3 -13  -4 2669.80  143.25
  -3 -13  -4 1844.63  115.11
   3  13   5 5624.87  396.04
  -3  13  -5 4864.60  260.88
  -3 -13  -5 5025.52  260.28
  -3 -13  -5 4742.02  265.07
   3 -13   5 4366.07  284.17
  -3 -13  -5 6011.35  306.82
   3  13   6   -5.35   30.10
  -3  13  -6   12.09   27.44
  -3 -13  -6   10.47    8.53
  -3 -13  -6   66.28   27.28
   3 -13   6   52.09   52.79
  -3 -13  -6   15.36   10.21
   3  13   7 1086.55  155.03
  -3  13  -7  670.84  173.82
  -3 -13  -7  625.43  110.97
   3 -13   7 1136.33  210.85
  -3 -13  -7  660.52  149.15
  -3 -13  -7  684.04  111.29
   3  13   8  243.02   80.56
  -3  13  -8  289.86   66.51
   3 -13   8  112.80   90.52
  -3 -13  -8  153.18   42.32
   3  13   9 2105.05  480.59
  -3  13  -9 3308.15  336.32
   3 -13   9 1920.40  755.85
   3 -13  10  127.63   87.62
  -3  13 -11  234.41   93.00
   3 -13  11  917.05  213.40
   3  15 -11  129.53   44.45
   3  15 -10 1188.57  227.65
   3 -15 -10 1141.30  249.26
   3  15  -9  912.20  128.39
   3 -15  -9  754.76  170.39
   3  15  -8  168.63   55.97
   3 -15  -8   58.21   17.12
   3  15  -7  938.70  219.78
  -3 -15   7 1198.50  212.13
   3 -15  -7  935.60  184.66
   3  15  -6  299.52   56.66
  -3 -15   6  241.64   82.31
   3 -15  -6  241.15   50.39
   3  15  -5 3287.79  181.36
  -3  15   5 2952.00  185.68
   3 -15  -5 3195.90  172.31
  -3 -15   5 3112.64  645.53
  -3  15   4 1015.06  103.55
   3  15  -4 1109.83  112.68
  -3  15   4 1253.92  148.52
   3 -15  -4 1061.84  118.24
  -3 -15   4 1352.67  263.24
  -3  15   3 1596.79  195.15
   3  15  -3 1511.05  145.18
  -3  15   3 1656.82   69.10
   3  15  -3 1476.47  157.73
  -3 -15   3 1600.29   77.26
  -3 -15   3 2019.81  383.95
   3 -15  -3 1328.96  114.46
  -3  15   2  365.06   75.03
   3  15  -2  299.91   63.59
  -3  15   2  392.67   61.39
  -3  15   2  278.77   33.56
   3  15  -2  298.36   64.53
  -3 -15   2  381.96   73.09
   3 -15  -2  355.55   58.97
  -3 -15   2  303.88   46.58
  -3  15   1 3747.42  190.66
   3  15  -1 3954.41  151.91
  -3  15   1 3603.64  147.07
   3  15  -1 3580.68  152.08
  -3  15   1 3710.56  140.81
  -3 -15   1 4284.54  152.72
  -3 -15   1 5024.69  456.18
   3 -15  -1 3580.65  141.73
  -3  15   0 7977.69  307.79
   3  15   0 9276.81  308.38
  -3  15   0 8549.63  295.75
   3  15   0 8915.87  329.89
  -3 -15   0 8282.66  276.65
  -3 -15   0 8537.72  319.19
  -3  15  -1 1912.83  147.32
   3  15   1 2396.92   90.80
   3  15   1 1629.60  148.95
  -3  15  -1 1965.72   79.76
  -3  15  -1 2077.61  135.50
  -3 -15  -1 2286.06  110.52
  -3 -15  -1 1881.35   72.48
   3 -15   1 2304.73  307.03
  -3  15  -2  680.16  129.58
   3  15   2  679.58   94.65
  -3  15  -2  569.20  102.84
  -3  15  -2  590.58  104.34
   3  15   2  546.58   62.76
  -3 -15  -2  470.43   66.50
  -3 -15  -2  559.88   91.36
   3 -15   2  525.02  114.59
  -3  15  -3 7218.70  342.87
   3  15   3 7564.44  288.52
  -3  15  -3 8172.30  324.37
  -3 -15  -3 7661.19  306.40
   3 -15   3 6536.81  311.40
  -3 -15  -3 7367.01  285.00
   3  15   4   82.71   29.89
  -3  15  -4   56.46   19.17
  -3 -15  -4   76.96   19.54
   3 -15   4   73.29   75.93
  -3 -15  -4   62.89   22.15
   3  15   5 7742.80  458.51
  -3  15  -5 6117.10  323.86
  -3 -15  -5 5671.21  349.89
   3 -15   5 6152.44  387.52
  -3 -15  -5 4691.55  241.29
   3  15   6 2473.58  263.54
  -3  15  -6 2199.17  176.26
  -3 -15  -6 2011.71  161.15
   3 -15   6 1935.66  216.41
  -3 -15  -6 2588.48  195.22
   3  15   7 1481.74  238.55
  -3  15  -7 1802.15  223.04
  -3 -15  -7 1734.25  209.21
   3 -15   7 1675.23  254.44
  -3 -15  -7 1522.85  188.69
  -3  15  -8  158.93   60.62
   3 -15   8  262.43  136.55
   3  15   9  648.65  124.79
  -3  15  -9  952.77  111.42
   3 -15   9  724.69  277.04
  -3  15 -10   60.58   40.61
   3 -15  10  174.18   95.37
   3  17 -11  122.04   50.55
   3 -17 -11    5.57   15.37
   3  17 -10  383.47  100.25
   3 -17 -10  234.20   65.09
   3  17  -9  509.02  106.39
   3 -17  -9  290.60   83.44
   3  17  -8 4833.78  779.29
  -3 -17   8 5530.74  920.89
   3 -17  -8 4984.04  804.11
   3  17  -7  856.16  171.56
  -3 -17   7 1018.16  445.87
   3 -17  -7  955.77  207.19
   3  17  -6  312.00   59.57
  -3 -17   6  371.12  172.20
   3 -17  -6  362.61   73.03
   3  17  -5  956.84  122.09
  -3 -17   5 1237.83  342.21
   3 -17  -5 1108.01  174.01
  -3  17   4 1931.63  165.94
  -3  17   4 1815.23  104.87
   3  17  -4 1717.96  132.18
  -3  17   4 2015.57  169.47
   3 -17  -4 1953.68  180.74
  -3 -17   4 2128.03  272.76
  -3  17   3  793.10  142.72
  -3  17   3  820.94   77.67
   3  17  -3  870.91   99.47
   3  17  -3  964.82  184.94
  -3  17   3  877.39  118.33
  -3 -17   3  892.26  172.69
   3 -17  -3 1205.27  154.52
  -3  17   2 3359.99  163.53
   3  17  -2 3647.51  153.10
  -3  17   2 3653.23  147.18
   3  17  -2 3238.24  165.38
  -3  17   2 3881.34  172.24
  -3 -17   2 3291.20  144.01
  -3 -17   2 3633.85  220.52
   3 -17  -2 4092.09  179.46
  -3  17   1 3012.18  165.25
   3  17  -1 3009.85  124.77
  -3  17   1 2813.17  117.08
  -3  17   1 2897.20  131.92
   3  17  -1 2719.36  138.57
  -3 -17   1 3662.14  317.88
   3 -17  -1 2535.57  123.51
  -3 -17   1 3085.19  130.65
  -3  17   0 1426.28  148.15
   3  17   0 1932.45   84.66
   3  17   0 2189.65  118.80
  -3  17   0 2049.48   91.29
  -3  17   0 2862.79  134.40
  -3 -17   0 2260.59  143.36
  -3 -17   0 1958.70  176.50
   3 -17   0 2936.93  360.26
  -3  17  -1  850.44  110.52
   3  17   1 1077.68  123.13
   3  17   1  876.94  100.56
  -3  17  -1  984.51  118.46
  -3  17  -1 1334.89  197.59
  -3 -17  -1 1144.04  123.42
  -3 -17  -1  849.15   79.99
   3 -17   1 1084.45  136.56
  -3  17  -2 1002.84  171.68
   3  17   2 1160.18  130.48
  -3  17  -2 1071.69  124.66
  -3  17  -2 1130.86  112.77
   3  17   2 1083.97  105.25
  -3 -17  -2 1141.31  204.64
  -3 -17  -2 1154.88  140.54
   3 -17   2  840.96  127.12
   3  17   3 5094.45  300.06
   3  17   3 3995.64  225.64
  -3  17  -3 4006.59  235.97
   3 -17   3 4042.40  292.61
  -3 -17  -3 3635.64  259.25
  -3 -17  -3 3621.29  207.70
   3  17   4 5647.09  306.84
   3  17   4 5916.04  301.51
  -3  17  -4 5854.45  309.34
   3 -17   4 4676.00  304.99
  -3 -17  -4 6235.79  328.70
  -3 -17  -4 5403.02  278.32
   3  17   5  354.78   60.71
  -3  17  -5  511.71   86.86
  -3 -17  -5  415.50   70.06
   3 -17   5  179.81  103.82
  -3 -17  -5  485.68   86.64
   3  17   6  128.43   55.76
  -3  17  -6  193.03   43.28
  -3 -17  -6  137.70   16.51
  -3 -17  -6   86.18   31.01
   3 -17   6   68.52   77.47
  -3 -17  -6  108.89   22.11
   3  17   7 1838.01  243.55
  -3  17  -7 2411.64  248.56
   3 -17   7 2185.21  433.77
  -3 -17  -7 2570.11  250.24
   3  17   8  232.31   90.08
  -3  17  -8  132.81   46.94
   3 -17   8  135.61  111.06
  -3  17  -9  937.49   64.74
   3 -17   9  940.23  201.36
  -3  17 -10  582.54  132.04
   3 -17  10  416.73  262.09
   3  19 -10  331.59   86.46
   3 -19 -10   95.00   46.38
   3  19  -9   74.82   34.15
   3 -19  -9  115.08   33.76
   3  19  -8   36.34   28.92
  -3 -19   8  -13.08  100.54
   3 -19  -8   46.31   19.25
   3  19  -7   36.39   31.34
  -3 -19   7  -43.33  103.76
   3 -19  -7   21.27   10.83
   3  19  -6 1826.61  159.38
  -3 -19   6 1505.07  447.44
   3 -19  -6 1760.07  221.07
   3  19  -5 3539.21  273.06
  -3 -19   5 2952.70  563.82
   3 -19  -5 3119.59  235.87
  -3  19   4 2181.42  214.68
  -3  19   4 2617.73  134.98
   3  19  -4 2894.35  160.85
  -3 -19   4 2428.07  381.22
   3 -19  -4 3660.67  221.87
  -3  19   3  235.69   56.58
  -3  19   3  273.99   46.29
   3  19  -3  329.63   60.03
  -3  19   3  200.12   29.16
   3 -19  -3  192.86   38.46
  -3 -19   3  276.72   76.87
  -3  19   2  956.36  138.66
   3  19  -2  751.08   95.88
  -3  19   2  942.62  127.05
   3  19  -2  777.55  116.51
  -3  19   2  833.56  110.62
  -3 -19   2 1363.70  313.94
   3 -19  -2  779.30  146.75
  -3  19   1  341.27   67.78
   3  19  -1  669.55  121.67
  -3  19   1  413.49   45.45
  -3  19   1  373.99   56.45
  -3 -19   1  567.53   66.17
   3 -19  -1  347.08   68.55
  -3 -19   1  450.40   99.81
  -3  19   0 3948.22  214.22
   3  19   0 4784.75  192.38
   3  19   0 5924.53  287.11
  -3  19   0 4432.86  180.80
  -3  19   0 6155.30  251.55
  -3 -19   0 5105.87  245.94
  -3 -19   0 4835.94  197.47
   3 -19   0 5966.38  292.98
  -3  19  -1  984.55  151.16
   3  19   1 1121.41  140.58
   3  19   1  870.84  129.48
  -3  19  -1  945.47  148.57
  -3 -19  -1  778.72  125.32
   3 -19   1 1017.45  181.69
  -3 -19  -1  873.23  141.54
   3  19   2 3442.18  200.06
   3  19   2 2799.28  162.62
  -3  19  -2 3469.28  205.59
  -3 -19  -2 3730.70  236.69
   3 -19   2 3315.97  525.23
  -3 -19  -2 3391.79  196.47
   3  19   3   56.80   26.96
  -3  19  -3  182.38   51.87
   3  19   3   81.34   19.58
  -3 -19  -3   85.47   24.38
   3 -19   3  233.13   88.24
   3  19   4 1195.10  180.07
   3  19   4  864.01  113.60
  -3  19  -4 1078.53  143.67
   3 -19   4 1141.29  191.23
  -3 -19  -4  857.68  154.17
  -3 -19  -4  910.58  132.16
   3  19   5   45.21   28.01
  -3  19  -5   82.42   41.83
  -3 -19  -5   13.87    5.88
   3 -19   5   96.88   85.17
  -3 -19  -5   61.00   29.01
   3  19   6 2200.15  368.21
  -3  19  -6 1715.64  217.80
  -3 -19  -6 1632.82  197.27
   3 -19   6 2261.74  328.87
  -3 -19  -6 2165.50  303.41
   3  19   7 1399.68  151.07
  -3  19  -7 1670.12  389.73
   3 -19   7 1917.18  378.37
  -3  19  -8 1698.90  223.33
   3 -19   8 2086.80  279.45
  -3  19  -9    0.39   40.68
   3 -19   9  317.85  149.03
  -3  19 -10  468.08  105.94
   3  21 -10   59.80   33.56
   3 -21 -10   73.00   28.50
   3  21  -9 1935.46  368.80
  -3 -21   9 1785.81  386.33
   3 -21  -9 1458.06  290.37
   3  21  -8 1271.53  140.96
  -3 -21   8 1240.25  504.16
   3 -21  -8 1271.34  236.14
   3  21  -7 2138.39  350.99
  -3 -21   7 1725.10  603.73
   3 -21  -7 2079.58  356.74
   3  21  -6  264.72   61.37
  -3 -21   6  175.20  125.61
   3 -21  -6  426.47   92.84
  -3  21   5  138.19   29.84
   3  21  -5  567.89  117.22
  -3 -21   5  782.29  169.74
   3 -21  -5  626.18  116.85
  -3  21   4  208.08   56.47
   3  21  -4  158.50   46.02
  -3  21   4   84.91   23.37
  -3 -21   4  334.57  106.31
   3 -21  -4  130.11   39.34
  -3  21   3 2810.89  433.21
  -3  21   3 3326.70  174.68
   3  21  -3 3418.38  187.20
  -3 -21   3 4005.56  272.52
   3 -21  -3 3681.50  272.17
   3  21  -2 5514.42  291.12
  -3  21   2 6289.77  325.60
   3  21  -2 5363.22  408.48
  -3 -21   2 5657.13  345.07
   3 -21  -2 4302.14  238.03
   3  21  -1 3059.52  184.32
  -3  21   1 2963.09  175.15
   3  21  -1 2780.57  199.34
   3 -21  -1 3808.50  450.40
  -3 -21   1 3060.35  241.95
  -3  21   0  188.27   78.20
   3  21   0   86.66   17.91
  -3  21   0  118.51   33.51
   3  21   0   28.94   16.71
   3 -21   0  252.05  118.32
  -3 -21   0  115.23   68.18
   3  21   1 3647.80  195.96
  -3  21  -1 3691.88  199.70
   3  21   1 4069.29  217.59
  -3 -21  -1 3650.20  195.06
   3 -21   1 3770.15  282.53
  -3 -21  -1 4251.58  295.27
   3  21   2  674.17   83.89
  -3  21  -2  559.00  108.86
   3  21   2  431.84   87.34
   3 -21   2  793.83  150.23
  -3 -21  -2  691.46  118.69
   3  21   3 3002.81  175.89
   3  21   3 3459.17  196.49
  -3  21  -3 3153.42  191.63
   3 -21   3 2836.11  246.30
  -3 -21  -3 3943.13  303.55
  -3 -21  -3 3063.02  178.74
   3  21   4 4269.58  353.56
   3  21   4 3873.10  286.92
  -3  21  -4 4328.11  329.80
   3 -21   4 4049.87  371.10
  -3 -21  -4 3722.83  315.40
  -3 -21  -4 3522.88  270.81
   3  21   5 2564.53  250.83
  -3  21  -5 2944.90  251.29
   3  21   5 2764.75  225.26
   3 -21   5 3176.19  332.82
   3  21   6  257.17   83.84
  -3  21  -6  195.30   69.52
  -3 -21  -6   57.65   18.79
   3 -21   6  224.55  113.69
  -3 -21  -6  108.64   34.92
   3  21   7  321.78   81.46
  -3  21  -7  427.93   71.57
   3 -21   7  449.18  133.15
  -3  21  -8  -18.23   43.74
   3 -21   8  126.51  111.11
  -3  21  -9  679.21  122.02
   3 -21   9  245.51  172.87
   3  23 -10  452.93  194.13
   3 -23 -10  407.35  111.11
   3  23  -9  193.68   61.37
  -3 -23   9  113.85  129.13
   3 -23  -9  161.97   43.98
   3  23  -8 1094.13  189.75
  -3 -23   8 1030.23  399.59
   3  23  -7  879.16  145.98
  -3 -23   7  723.45  265.12
   3 -23  -7 1144.11  238.08
   3  23  -6  448.34  118.06
  -3 -23   6  518.86  199.74
   3 -23  -6  512.40   81.07
  -3  23   5 4283.08  535.61
  -3  23   5 5001.71  593.86
   3  23  -5 4050.88  489.67
  -3 -23   5 4421.76  787.67
   3 -23  -5 4708.90  567.28
  -3  23   4   84.68   36.34
   3  23  -4  209.19   38.55
  -3  23   4  133.49   29.99
  -3 -23   4  183.49   85.37
   3 -23  -4  192.98   43.63
  -3  23   3 1070.18  237.26
  -3  23   3 1484.15  124.06
   3  23  -3 1501.29  123.61
  -3 -23   3 1037.03  215.99
   3 -23  -3 1161.94  245.85
  -3  23   2 2236.99  170.54
   3  23  -2 2712.03  164.54
  -3  23   2 2930.43  208.15
  -3 -23   2 2638.14  216.33
   3 -23  -2 1620.85  251.13
   3  23  -1 1191.65  144.75
  -3  23   1 1316.29  202.72
   3  23  -1  833.76  121.16
  -3 -23   1 1423.39  203.50
   3 -23  -1 1635.88  161.01
   3  23   0 4142.76  239.29
  -3  23   0 4349.80  252.73
   3  23   0 2812.61  173.77
   3 -23   0 4189.40  288.55
  -3 -23   0 4376.94  307.13
   3  23   1 9975.57  560.25
  -3  23  -1 8950.83  506.17
   3  23   110478.34  589.89
   3 -23   1 9513.97  577.14
  -3 -23  -110506.32  666.14
   3  23   2 1686.30  140.50
  -3  23  -2 1367.38  167.47
   3  23   2 1396.27  168.39
   3 -23   2 1511.85  216.11
  -3 -23  -2 1738.11  149.96
   3  23   3 1269.70  201.24
  -3  23  -3 1496.41  125.63
   3  23   3 1088.26  201.36
  -3 -23  -3 1382.23  225.39
   3 -23   3 1324.92  283.73
   3  23   4 2264.04  232.47
  -3  23  -4 1792.32  159.31
   3  23   4 1898.55  156.64
  -3 -23  -4 1709.61  147.69
  -3 -23  -4 1744.29  324.13
   3 -23   4 1709.33  238.31
   3  23   5  920.26  176.16
  -3  23  -5  819.98  171.79
  -3 -23  -5  780.07  146.74
   3 -23   5  541.05  183.83
  -3 -23  -5  791.40  156.80
   3  23   6 2194.51  466.51
  -3  23  -6 2024.96  334.14
   3 -23   6 1676.50  323.13
  -3 -23  -6 1773.33  302.46
   3  23   7 1353.15  241.41
  -3  23  -7 1668.33  178.86
   3 -23   7  863.87  272.78
  -3  23  -8 1079.89  219.40
   3 -23   8 1535.48  343.90
  -3  23  -9   28.42   40.81
   3 -23   9  291.65  114.29
   3  25  -9  132.28   40.99
  -3 -25   9   29.42  112.79
   3 -25  -9   73.41   30.74
   3  25  -8  815.25  266.03
  -3 -25   8  810.80  361.41
   3 -25  -8 1142.46  293.83
   3  25  -7   41.85   25.36
  -3 -25   7  -11.97  114.46
   3 -25  -7   27.97   18.63
   3  25  -6 1306.13  228.11
  -3 -25   6 1235.76  287.71
   3 -25  -6 1007.71  258.34
  -3  25   5   91.61   22.84
   3  25  -5  273.49   75.19
  -3 -25   5  530.05  131.20
   3 -25  -5  365.47  108.60
  -3  25   4 1550.21  318.78
  -3  25   4 2148.27  256.89
   3  25  -4 2441.67  297.75
  -3 -25   4 2734.50  565.15
  -3  25   3   24.97   35.12
   3  25  -3   34.85   31.62
  -3  25   3   45.26   13.55
  -3 -25   3  243.01  143.68
   3 -25  -3   20.60   14.50
  -3  25   2 2672.94  243.18
  -3  25   2 4147.88  310.45
   3  25  -2 4079.04  315.52
  -3 -25   2 4192.44  366.87
   3 -25  -2 5150.92  424.88
   3  25  -1    2.12   23.99
  -3  25   1   57.62   34.38
  -3 -25   1  129.25   79.96
   3 -25  -1  -28.27   69.94
   3  25   0  802.59  122.89
  -3  25   0  684.05  110.39
   3  25   0  335.41   86.85
   3 -25   0  729.15  158.57
  -3 -25   0  759.76  165.38
   3  25   1  -11.45   17.15
  -3  25  -1   47.36   27.76
  -3 -25  -1  -59.49   55.84
   3 -25   1  145.87   87.20
   3  25   2 1155.77  150.87
  -3  25  -2 1255.42  193.12
   3  25   2  798.63  114.43
   3 -25   2  806.23  183.77
  -3 -25  -2 1048.36  148.32
   3  25   3  102.78   24.76
  -3  25  -3   96.03   40.39
   3  25   3   48.15   12.40
  -3 -25  -3   95.12   90.40
   3 -25   3  -25.81  126.78
   3  25   4 4777.40  483.96
  -3  25  -4 3631.12  380.12
   3 -25   4 4211.66  465.50
  -3 -25  -4 4300.46  471.61
   3  25   5   17.39   23.39
  -3  25  -5   59.72   36.57
   3 -25   5  270.47  120.25
  -3 -25  -5   58.27   36.27
   3  25   6  419.50   70.66
  -3  25  -6  951.48  139.88
   3 -25   6  920.33  229.71
  -3  25  -7   66.92   40.23
   3 -25   7   17.48   61.56
  -3  25  -8  145.60   57.81
   3 -25   8  157.67  124.16
  -3  25  -9  150.76   79.77
   3 -25   9   18.83  126.97
   3  27  -8   56.92   26.01
  -3 -27   8  128.23  124.21
   3 -27  -8  -12.56   29.56
   3  27  -7  250.61   89.01
  -3 -27   7  299.24  150.73
   3 -27  -7  150.35   51.62
   3  27  -6  637.84  145.46
  -3 -27   6  281.70  172.16
   3  27  -5  148.91   41.91
  -3 -27   5   83.72   78.14
  -3  27   4 1168.39  142.84
   3  27  -4 1153.88  149.54
  -3 -27   4 1206.35  227.02
   3 -27  -4  911.90  186.34
  -3  27   3  601.84  130.70
   3  27  -3  731.67  206.36
  -3 -27   3  619.18  180.86
   3 -27  -3  692.90  201.71
  -3  27   2   36.66   58.28
   3  27  -2  155.77   32.66
  -3  27   2  146.76   26.27
  -3 -27   2  174.88   72.41
   3 -27  -2  212.36  110.73
   3  27  -1 1574.89  202.20
  -3 -27   1 1429.07  223.84
   3 -27  -1 1375.49  394.78
   3  27   0  514.90  109.68
  -3  27   0  530.07  120.91
  -3 -27   0  371.04  102.95
   3 -27   0  256.85   81.43
   3  27   1  293.54   66.10
  -3  27  -1  441.21   85.20
   3  27   1  317.01   66.50
   3 -27   1  158.52   58.80
  -3 -27  -1  260.54  102.19
  -3  27  -2 1880.51  232.09
   3  27   2 1560.68  208.91
   3 -27   2 1325.80  277.06
  -3 -27  -2 1675.92  272.74
   3  27   3  406.23   53.50
  -3  27  -3  411.36   96.00
   3 -27   3  856.30  224.23
  -3 -27  -3  262.06   95.07
   3  27   4  122.24   53.83
  -3  27  -4  248.92   62.74
   3 -27   4  193.29  116.69
  -3 -27  -4  119.85   64.58
   3  27   5  567.39  137.02
  -3  27  -5  673.91  167.76
   3 -27   5  881.06  200.97
   3  27   6  407.38  113.19
  -3  27  -6  724.41  152.94
   3 -27   6  856.89  188.76
  -3  27  -7  690.84  131.92
   3 -27   7  484.21  145.98
  -3  27  -8  800.40  123.81
   3 -27   8  532.10  217.46
   3  29  -8   44.21   52.99
  -3 -29   8  119.53   98.20
   3 -29  -8   46.10   30.54
   3  29  -7  245.67   90.45
  -3 -29   7  155.57  112.53
   3 -29  -7  197.69   48.65
   3  29  -6  168.12   45.86
  -3 -29   6   90.54  118.68
   3 -29  -6   91.76   43.36
   3  29  -5  239.75   64.24
  -3 -29   5  292.66  137.06
   3 -29  -5  110.23   40.70
  -3  29   4  431.40   60.22
   3  29  -4  512.92  110.44
  -3 -29   4  948.31  207.20
   3 -29  -4  141.22   37.08
   3  29  -3 2135.83  353.82
  -3  29   3 1985.57  321.47
  -3 -29   3 2016.65  364.21
   3 -29  -3 2244.75  389.44
  -3  29   2  139.87   43.88
   3  29  -2  153.56   51.56
  -3 -29   2  389.49  143.72
   3 -29  -2  224.34   98.89
   3  29  -1 2764.28  269.12
  -3  29   1 3134.82  303.85
  -3 -29   1 2895.79  324.39
   3 -29  -1 2702.77  348.95
   3  29   0  135.91   53.87
  -3  29   0  292.55   84.17
  -3 -29   0  202.16  117.55
   3 -29   0  344.90  112.25
   3  29   1 1577.22  165.99
  -3  29  -1 1527.88  158.74
  -3 -29  -1  954.28  203.43
   3 -29   1 1425.89  186.17
   3  29   2  655.47  127.29
  -3  29  -2  668.50  101.64
   3 -29   2  832.13  195.60
   3  29   3 1681.69  302.07
  -3  29  -3 2002.70  331.64
   3 -29   3 1817.81  345.25
  -3 -29  -3 2140.47  372.38
   3  29   4  462.06   98.87
  -3  29  -4  615.00   93.58
   3 -29   4  421.31  166.47
   3  29   5 1726.68  327.54
  -3  29  -5 1885.66  297.84
   3 -29   5 2839.36  493.10
  -3  29  -6  513.42  181.52
   3 -29   6  931.06  271.38
  -3  29  -7  129.28   38.82
   3 -29   7  203.82  155.71
   3  31  -7  128.62   50.51
  -3 -31   7  -59.80  115.31
   3 -31  -7   91.01   41.10
   3  31  -6 2025.10  319.27
  -3 -31   6 1049.11  476.07
   3 -31  -6 1172.14  257.37
   3  31  -5  938.31  241.24
  -3 -31   5  673.85  241.26
   3 -31  -5  345.26  114.69
   3  31  -4 2985.29  309.23
  -3 -31   4 3099.00  392.85
   3 -31  -4 2855.62  529.00
  -3  31   3   49.94   23.11
  -3 -31   3  189.01  103.61
   3 -31  -3  106.10   79.08
  -3  31   2   67.15   24.32
   3  31  -2   67.61   30.94
  -3 -31   2  106.17  143.73
   3 -31  -2   70.03   72.79
   3  31  -1   -5.68   22.02
  -3  31   1   45.60   28.67
  -3 -31   1   67.46   80.28
   3 -31  -1  139.59   58.33
   3  31   0 1505.47  173.21
  -3  31   0 1235.52  196.76
  -3 -31   0 1503.51  251.79
   3 -31   0  950.35  297.25
   3  31   1 1248.16  117.45
  -3  31  -1 1052.45  155.69
  -3 -31  -1 1189.04  205.77
   3 -31   1 1189.56  258.52
   3  31   2 3627.59  399.22
  -3  31  -2 3724.42  418.48
  -3 -31  -2 3696.62  474.08
   3 -31   2 2415.94  610.93
   3  31   3   86.55   19.73
  -3  31  -3   98.00   39.44
   3 -31   3  486.08  162.24
  -3 -31  -3   65.23   56.71
   3  31   4  375.27  105.85
  -3  31  -4  343.17   83.44
  -3 -31  -4  210.83   95.06
   3 -31   4  114.50  119.15
  -3  31  -5   66.55   57.63
   3 -31   5   24.26  121.25
  -3  31  -6  809.75  123.01
   3 -31   6  426.91  160.89
  -3  31  -7  113.25   45.98
   3 -31   7  230.27   95.72
   3  33  -6  418.54  228.54
  -3 -33   6  673.21  420.45
   3 -33  -6  565.82  239.95
   3  33  -5  109.85   35.95
  -3 -33   5  116.18   74.85
   3 -33  -5  181.22   80.30
   3  33  -4 1251.51  289.73
  -3 -33   4  856.80  366.32
   3 -33  -4 1287.89  355.70
   3  33  -3  240.80   55.33
  -3  33   3   42.57   15.40
  -3 -33   3  169.98  145.20
   3 -33  -3  217.44   73.72
  -3  33   2  354.12  116.45
   3  33  -2  444.00  169.93
   3 -33  -2  211.00   76.00
  -3  33   1  869.74   53.12
   3  33  -1  849.20  115.27
  -3 -33   1  774.97  203.27
   3 -33  -1  754.07  210.58
   3  33   0  436.33   96.29
  -3  33   0  364.39   61.67
   3 -33   0  145.73  131.66
   3  33   1  310.25   60.67
  -3  33  -1  218.58   61.66
  -3 -33  -1  262.25  126.50
   3 -33   1  164.32  111.16
   3  33   2 1017.37   93.86
  -3  33  -2 1141.14  220.92
   3 -33   2  795.17  208.77
  -3 -33  -2  907.77  160.02
   3  33   3   63.48   22.48
  -3  33  -3   86.26   44.22
   3  33   4 2747.90  443.45
  -3  33  -4 2274.03  372.54
   3 -33   4 1451.98  812.90
  -3  33  -5  178.56   60.62
   3 -33   5  120.60  102.96
  -3  33  -6  103.22   62.83
   3 -33   6  251.09  134.11
   3  35  -5  280.22  106.43
  -3 -35   5  567.26  170.65
   3 -35  -5  567.31  156.57
   3  35  -4  133.98   45.08
  -3 -35   4  136.40   99.16
   3 -35  -4  186.92   76.30
   3  35  -3  269.25  116.30
  -3 -35   3  519.51  154.16
   3 -35  -3  232.04  103.11
  -3  35   2   -3.31   18.47
   3  35  -2   75.22   29.39
  -3 -35   2   55.74  140.69
   3 -35  -2  133.66   82.95
   3  35  -1 2032.75  399.97
  -3 -35   1 1215.84  496.13
   3 -35  -1  946.70  457.17
   3  35   0  110.08   46.81
  -3  35   0   23.50   26.09
  -3 -35   0  -49.77   97.19
   3 -35   0  139.24   62.30
   3  35   1  518.84  171.99
  -3  35  -1  661.97  220.08
   3 -35   1  346.65  181.93
   3  35   2  -18.38   20.75
  -3  35  -2   98.53   36.51
   3 -35   2  251.30  159.28
  -3 -35  -2  195.31  119.41
   3  35   3   80.62   27.65
  -3  35  -3  131.82   55.06
   3 -35   3  108.51  113.54
  -3  35  -4   22.33   38.99
   3 -35   4  386.99  196.38
  -3  35  -5   -1.19   40.95
   3 -35   5  156.91  146.08
   3  37  -4  939.79  185.76
  -3 -37   4  840.36  219.43
   3 -37  -4  323.95   88.31
   3  37  -3   60.51   27.65
  -3 -37   3  351.13  189.32
   3 -37  -3  142.82   91.13
   3  37  -2  885.69  194.88
  -3 -37   2  993.42  212.52
   3 -37  -2  447.04  207.50
   3  37  -1  227.77   96.81
  -3  37   1  219.31   98.50
  -3 -37   1  522.06  172.52
   3 -37  -1  207.11   90.08
   3  37   0  352.31   98.92
  -3  37   0  140.68   39.30
   3 -37   0   83.11   73.99
   3  37   1   45.75   27.45
  -3  37  -1   41.90   26.70
  -3 -37  -1   91.23   77.20
   3 -37   1  228.49  118.43
   3  37   2  192.04   85.19
  -3  37  -2  322.70  125.43
   3 -37   2  229.38  128.00
  -3  37  -3  534.37  145.43
   3 -37   3  898.38  231.64
  -3  39   0  481.35  224.04
   3 -39   0  869.28  235.03
   4   0 -11   65.01   41.89
   4   0 -10  116.25   35.24
   4   0  -9   12.25   11.91
   4   0  -9   60.99   42.21
   4   0  -8 1778.71  334.52
   4   0  -8 3123.12  233.23
   4   0  -8 3856.33  297.84
   4   0  -7    7.27    4.59
   4   0  -7   16.99   26.57
   4   0  -6 2154.52  125.56
  -4   0   6 2105.50  122.98
   4   0  -6 2108.48  132.93
   4   0  -5    9.71    8.39
  -4   0   5   22.74    5.55
   4   0  -5   63.60   27.70
   4   0  -4 4794.80  159.67
  -4   0   4 4695.41  158.13
   4   0  -4 4734.34  167.63
   4   0  -3    4.74    6.68
  -4   0   3    8.03    7.81
   4   0  -3    8.13   22.52
   4   0  -219757.46  483.26
  -4   0   224944.41  607.72
   4   0  -222882.29  562.21
  -4   0   223946.58  589.20
   4   0  -1  -22.13   20.25
  -4   0   1   17.07   10.17
  -4   0   1   49.75   15.15
   4   0  -1   37.51   21.97
  -4   0   0 4224.68  117.18
   4   0   0 4196.76  110.59
  -4   0   0 4375.78  113.95
   4   0   1   38.09   28.39
  -4   0  -1    3.16   11.17
   4   0   1   43.15   19.27
  -4   0  -1   18.75   12.89
   4   0   2 1078.35  138.39
  -4   0  -2  834.27  122.82
   4   0   2 1118.24  118.69
  -4   0  -2 1526.40   89.79
   4   0   3   76.50   52.38
  -4   0  -3  155.62   59.19
   4   0   3   71.87   31.46
  -4   0  -3   34.74   14.46
   4   0   4 4926.50  335.95
  -4   0  -4 5449.43  218.73
   4   0   4 4576.04  180.99
  -4   0  -4 5241.31  199.58
   4   0   5  -22.39   70.84
  -4   0  -5   74.05   38.51
   4   0   5   55.32   34.25
  -4   0  -5   -1.04   24.83
   4   0   6  619.83  169.83
  -4   0  -6  508.78  150.49
   4   0   6  557.07  138.35
  -4   0  -6  340.71   63.49
   4   0   7   39.67   45.52
   4   0   7  109.60   46.60
  -4   0  -7   22.38   33.69
  -4   0  -8  249.94   66.05
  -4   0  -8   70.01   32.57
  -4   0  -9   29.11   16.83
  -4   0 -10 1757.04  275.61
  -4   0 -11   24.65   30.50
  -4   0 -11    0.69   23.08
   4   2 -12   33.54   52.89
   4  -2 -12   90.64   42.80
   4   2 -11 2082.62  399.68
   4  -2 -11 1541.13  321.52
   4   2 -10 1171.74  158.22
   4  -2 -10  792.38  158.46
   4   2  -9 6436.23  616.40
   4   2  -9 5395.22  509.63
   4  -2  -9 5658.14  532.76
   4  -2  -9 6214.44  593.17
   4  -2  -9 4820.73  471.30
   4   2  -8   72.63   35.47
   4   2  -8   36.09   21.58
   4  -2  -8   25.09   11.82
  -4  -2   8   82.44   22.60
   4  -2  -8  132.76   49.03
   4  -2  -8   45.29   34.30
   4   2  -7 2127.06  140.40
   4   2  -7 2069.45  116.60
  -4  -2   7 2220.54  120.74
   4  -2  -7 2263.37  134.35
   4  -2  -7 2051.53  108.14
   4   2  -6  453.65   72.31
   4   2  -6  468.16   70.33
  -4   2   6  561.17   87.56
  -4  -2   6  388.68   63.30
   4  -2  -6  530.30   75.94
   4  -2  -6  464.02   62.72
   4   2  -513073.31  495.10
  -4   2   514468.91  545.72
   4   2  -514201.88  547.01
   4  -2  -514599.88  550.42
  -4  -2   512734.74  483.31
   4  -2  -513501.02  518.93
   4   2  -4  194.23   56.57
   4   2  -4  250.34   43.84
   4   2  -4  115.18   30.75
  -4   2   4  266.18   42.50
   4  -2  -4  239.77   41.93
   4  -2  -4  197.20   36.36
  -4  -2   4  331.39   48.36
   4   2  -328271.01 2452.21
   4   2  -328949.90 2508.61
  -4   2   327526.64  880.68
  -4   2   327472.31  888.24
   4  -2  -337730.98 3269.40
   4  -2  -325824.30  832.84
  -4  -2   326550.21  851.31
  -4   2   2  475.53   39.21
   4   2  -2  460.04   38.48
   4   2  -2  476.95   44.11
  -4   2   2  493.79   45.60
   4  -2  -2  524.16   74.54
  -4  -2   2  518.69   42.31
   4  -2  -2  615.92   94.87
  -4   2   1 4156.30  114.45
  -4   2   1 3546.47  100.27
   4   2  -1 3476.37   94.41
  -4  -2   1 3860.43  102.69
   4  -2  -1 3784.06  112.31
  -4  -2   1 3598.08   98.44
  -4   2   0   33.85   11.71
   4   2   0   69.98   32.04
   4   2   0   -0.78   10.14
  -4   2   0    9.84   11.97
   4  -2   0  209.93   62.03
  -4  -2   0   28.00   14.03
   4  -2   0   27.22   10.29
  -4  -2   0   29.00   15.36
  -4   2  -128464.46  692.15
   4   2   126724.05  647.99
   4  -2   130623.08  749.58
  -4  -2  -131097.23  767.85
   4  -2   126339.12  670.41
  -4  -2  -128535.78  691.74
  -4   2  -2   99.22   54.84
   4   2   2  111.00   43.98
  -4   2  -2   54.19   15.23
   4   2   2   76.70   30.36
   4  -2   2  193.42   39.64
  -4  -2  -2   84.35   25.86
   4  -2   2   57.00   49.22
  -4  -2  -2   63.60   10.57
   4   2   3 3824.61  240.95
  -4   2  -3 5072.23  203.36
  -4   2  -3 3444.97  124.07
   4   2   3 4950.94  178.28
   4  -2   3 5366.77  469.28
   4  -2   3 5166.15  198.36
  -4  -2  -3 4422.11  154.04
  -4  -2  -3 3615.96  134.35
   4   2   4  676.91   92.98
  -4   2  -4  729.27  109.02
   4   2   4  453.33   68.61
  -4   2  -4  521.47   71.06
   4  -2   4  746.90  156.46
   4  -2   4  623.92  140.68
  -4  -2  -4  693.05  128.80
  -4  -2  -4  370.51   74.68
   4   2   5 4699.27  251.35
  -4   2  -5 4315.31  239.56
   4   2   5 4341.24  227.71
  -4   2  -5 4290.80  228.28
   4  -2   5 4435.87  424.17
   4  -2   5 4452.26  210.51
  -4  -2  -5 4288.21  187.13
   4   2   6  152.66   64.66
  -4   2  -6   26.64   28.65
   4  -2   6  139.74   70.00
  -4  -2  -6   52.60   25.45
  -4  -2  -6   86.74   42.73
   4  -2   6  154.78   63.80
   4   2   7 6384.64  741.31
  -4   2  -7 6886.74  512.63
  -4   2  -7 6240.80  478.77
  -4  -2  -7 6165.90  470.36
   4  -2   7 6111.70  522.59
   4   2   8   53.14   91.46
  -4   2  -8   50.21   30.22
   4  -2   8   63.60   55.36
  -4  -2  -8   42.88   35.02
  -4   2  -9 1789.59  296.86
  -4   2 -10   58.17   54.30
  -4  -2 -10   60.74   34.41
  -4  -2 -10   24.18   24.30
  -4   2 -11  346.85   89.56
  -4  -2 -11  196.23   53.03
   4   4 -12  276.59   83.16
   4  -4 -12  213.61   64.01
   4   4 -11 1733.14  402.44
   4  -4 -11 1611.71  307.53
   4   4 -10   51.54   21.10
   4   4 -10  112.95   45.89
   4  -4 -10   19.74   25.62
   4   4  -9   84.86   36.61
   4   4  -9  128.14   51.54
   4  -4  -9  120.75   47.87
   4  -4  -9   50.40   13.09
   4   4  -8  347.93   68.34
   4   4  -8  291.76   83.26
   4  -4  -8  407.94   49.10
   4  -4  -8  351.82   81.89
   4  -4  -8  167.47   36.12
   4   4  -7 4514.20  256.41
   4   4  -7 4796.98  282.97
   4  -4  -7 3901.17  248.79
  -4  -4   7 4400.12  251.29
   4  -4  -7 4482.76  271.85
   4  -4  -7 4894.44  272.99
   4   4  -6  435.42   78.75
  -4   4   6  415.14   50.98
   4  -4  -6  400.46   60.13
  -4  -4   6  459.31  113.29
   4  -4  -6  484.64   68.61
   4   4  -5 5067.87  420.21
   4   4  -5 4942.49  195.34
  -4   4   5 5321.10  202.85
  -4  -4   5 4621.61  184.13
   4  -4  -5 4713.40  179.62
   4  -4  -5 4788.35  194.87
   4   4  -4 2649.88  203.47
   4   4  -4 2862.65  101.54
  -4   4   4 2746.51  103.56
  -4   4   4 2901.16   98.22
   4  -4  -4 3523.10  121.01
   4  -4  -4 2859.93  107.69
  -4  -4   4 2817.89  102.01
   4   4  -3 5924.45  242.74
   4   4  -3 5861.22  199.36
  -4   4   3 6071.56  197.01
  -4   4   3 6499.68  220.54
  -4  -4   3 5578.49  187.69
   4  -4  -3 6522.87  229.89
   4  -4  -3 5355.27  181.53
   4   4  -2  485.82   43.13
  -4   4   2  347.51   29.40
   4   4  -2  530.78   83.82
  -4   4   2  586.38   86.78
   4  -4  -2  729.45  132.19
  -4  -4   2  493.77   67.30
   4  -4  -2  354.56   35.22
  -4   4   116959.89  418.72
   4   4  -115454.46  381.76
   4   4  -115613.52  385.31
   4  -4  -116107.78  398.93
   4  -4  -117567.48  451.29
  -4  -4   117714.09  435.67
  -4   4   0 2123.04   62.17
  -4   4   0 2605.12  110.45
   4   4   0 2941.78  143.90
   4   4   0 2069.19   59.78
  -4  -4   0 2168.57   63.63
   4  -4   0 1943.19   67.49
   4  -4   0 2176.69  195.11
   4   4   1  730.80   66.96
  -4   4  -1  932.19   90.42
   4   4   1  819.49   62.04
  -4   4  -1  768.02   66.76
   4  -4   1 1192.13  144.44
  -4  -4  -1  798.71   84.54
   4  -4   1  852.61   87.89
  -4  -4  -1  847.76   66.50
   4   4   2 1674.71  134.36
  -4   4  -2 1267.29   97.49
  -4   4  -2 1423.96  103.12
   4   4   2 1165.30   80.36
   4  -4   2 1108.72  128.43
  -4  -4  -2 1634.99  103.81
   4  -4   2 1474.11  118.03
  -4  -4  -2 1352.91   76.54
   4   4   3 4994.57  171.89
  -4   4  -3 5088.51  204.98
   4   4   3 5650.61  278.38
  -4  -4  -3 5007.22  177.81
   4  -4   3 5438.15  417.55
   4  -4   3 3915.86  244.78
   4   4   4 2224.64  100.75
   4   4   4 1818.81  277.16
  -4   4  -4 2032.89  123.58
  -4   4  -4 3112.91  150.24
   4  -4   4 2147.99  310.54
   4  -4   4 2196.37  136.68
  -4  -4  -4 3045.86  132.75
  -4  -4  -4 1992.01   93.69
  -4   4  -5 6584.99  518.61
   4   4   5 8369.81  379.76
  -4   4  -5 8266.96  345.74
   4  -4   5 7881.23  802.92
   4  -4   5 7032.23  335.03
  -4  -4  -5 6219.42  270.01
  -4  -4  -5 7521.31  303.08
   4   4   6  192.65   96.31
  -4   4  -6  190.18   60.83
   4  -4   6  257.39  100.25
  -4  -4  -6   41.18   24.91
  -4  -4  -6  158.62   47.93
   4  -4   6  245.59   68.51
   4   4   7 5168.12  544.07
  -4   4  -7 4441.27  349.34
  -4   4  -7 3864.80  311.68
  -4  -4  -7 3918.43  319.91
   4  -4   7 4387.67  359.61
   4   4   8   18.65   35.75
  -4   4  -8   49.77   29.36
   4  -4   8  -41.37   61.30
  -4  -4  -8    7.79   15.68
  -4  -4  -8   22.37   19.57
  -4   4  -9 1502.77  245.27
  -4  -4  -9 1509.85  174.24
  -4  -4  -9 1395.20  157.66
  -4   4 -10  141.15   51.21
  -4  -4 -10   58.19   27.51
  -4   4 -11  505.17  138.94
   4   6 -12   39.24   41.39
   4  -6 -12   77.10   48.49
   4   6 -11   14.61   18.13
   4   6 -11  132.23   53.08
   4  -6 -11   14.05   27.32
   4   6 -10  261.28   98.08
   4   6 -10  519.84  194.80
   4  -6 -10  502.22  136.77
   4   6  -9  112.94   32.09
   4   6  -9  335.02   97.24
   4  -6  -9   25.11   12.56
   4  -6  -9  232.63   61.10
   4   6  -8  803.50  115.13
   4  -6  -8  239.64   53.33
   4  -6  -8  857.96  107.51
   4   6  -7  151.88   39.82
  -4  -6   7  120.79   31.88
   4  -6  -7  179.15   47.56
   4   6  -6  118.00   26.85
   4  -6  -6   58.18   12.39
   4  -6  -6   18.90   11.67
  -4  -6   6   10.79   17.21
   4  -6  -6   66.39   31.61
   4   6  -5 2729.86  409.19
   4   6  -5 2670.61  116.23
  -4   6   5 2609.32  114.69
  -4   6   5 2620.15   99.87
   4  -6  -5 1950.79   80.65
   4  -6  -5 2723.70  129.17
  -4  -6   5 2495.02  105.10
   4   6  -4 2315.01  209.18
   4   6  -4 2291.35   86.88
  -4   6   4 2376.49   80.62
  -4   6   4 2661.93  163.52
  -4  -6   4 2349.74   91.35
   4  -6  -4 2318.89   90.86
   4  -6  -4 2669.13  116.34
   4   6  -3  552.91   77.85
  -4   6   3  580.51   46.52
   4   6  -3  551.26   48.05
  -4   6   3  489.99   63.46
   4  -6  -3  561.49   83.76
  -4  -6   3  656.41  113.45
   4  -6  -3  622.97   91.35
   4   6  -2 2400.32  237.34
  -4   6   2 2084.97   76.58
   4   6  -2 2088.20   76.56
  -4   6   2 2006.91   90.19
  -4  -6   2 2119.03   76.73
   4  -6  -2 2018.45   84.62
   4  -6  -2 1701.85  116.20
   4   6  -1 1585.96  177.07
  -4   6   1 1721.80  167.14
   4   6  -1 1324.52  102.96
  -4   6   1 1423.99  110.53
  -4  -6   1 1350.12  103.50
   4  -6  -1 1254.80   96.94
   4  -6  -1 1593.51  260.42
   4   6   0 6843.21  215.22
  -4   6   0 6789.02  196.54
   4   6   0 5898.34  155.21
  -4   6   0 6838.71  175.08
   4   6   0 6617.50  170.27
  -4  -6   0 5693.00  150.77
   4  -6   0 7296.41  280.98
   4   6   1 1883.63   70.92
  -4   6  -1 1764.12  120.58
   4   6   1 2225.80  111.09
   4   6   1 1947.96   51.08
  -4  -6  -1 1970.67   61.62
   4  -6   1 1562.10   99.60
   4  -6   1 2211.08  182.64
   4   6   2 1188.59  121.84
  -4   6  -2 1231.69  104.80
  -4   6  -2 1271.98   80.91
   4  -6   2 1360.50  280.23
   4  -6   2 1140.45  100.29
  -4  -6  -2  986.89   64.78
   4   6   3 5924.57  236.27
  -4   6  -3 4168.33  177.83
   4  -6   3 4378.10  212.89
   4  -6   3 4473.89  187.28
  -4   6  -4 3509.55  175.11
   4   6   4 4239.75  239.70
  -4   6  -4 5110.72  230.22
   4  -6   4 3487.68  481.40
   4  -6   4 3589.31  193.01
  -4  -6  -4 4843.52  199.06
  -4  -6  -4 4263.31  162.42
   4   6   5   78.34   41.84
  -4   6  -5   18.09   42.32
  -4   6  -5  153.68   44.25
   4  -6   5  103.42   84.89
   4  -6   5  107.63   58.42
  -4  -6  -5   75.24   38.16
  -4  -6  -5  120.75   26.97
  -4  -6  -5  106.22   20.68
   4   6   6 4850.75  369.37
  -4   6  -6 4722.43  266.12
  -4   6  -6 4787.02  276.10
  -4  -6  -6 4358.13  234.96
   4  -6   6 5286.57  325.57
  -4  -6  -6 4617.76  251.63
  -4  -6  -6 4983.62  256.11
   4   6   7  847.23  183.59
  -4   6  -7 1006.25  174.48
   4  -6   7  807.58  252.68
  -4  -6  -7  440.32  154.20
  -4  -6  -7  760.07  121.07
   4   6   8  432.35  112.20
  -4   6  -8  546.22  156.89
   4  -6   8  614.68  270.15
  -4  -6  -8  249.74   82.84
  -4  -6  -8  553.74   93.64
  -4   6  -9   56.92   32.76
  -4  -6  -9   63.77   33.40
   4  -6   9   75.87   59.11
  -4  -6  -9   29.60   23.25
  -4   6 -10   74.33   40.42
  -4  -6 -10   68.85   42.39
  -4   6 -11  145.09   75.68
   4   8 -12  101.59   74.97
   4   8 -11   43.61   31.32
   4   8 -11  153.48   68.82
   4  -8 -11  178.97   51.02
   4   8 -10  150.26   50.31
   4  -8 -10  231.53   53.06
   4   8  -9  633.22  117.25
   4  -8  -9  833.08  111.15
   4   8  -8 1513.49  195.76
   4  -8  -8 1660.55  158.40
   4   8  -7 8113.21  456.70
   4  -8  -7 8437.06  478.68
   4   8  -6   42.34   21.61
  -4  -8   6    8.77   17.38
   4  -8  -6   66.50   29.94
   4   8  -5 4699.37  190.35
   4   8  -5 4662.87  235.71
  -4   8   5 4825.33  197.15
  -4  -8   5 4557.91  184.34
   4  -8  -5 5110.64  208.39
   4   8  -4 2030.77   79.08
  -4   8   4 1966.93   65.18
   4   8  -4 1939.56  146.90
  -4   8   4 1980.33   81.05
  -4  -8   4 1772.44  150.80
   4  -8  -4 2112.54  112.63
   4   8  -3 5636.56  249.38
  -4   8   3 4938.80  160.59
   4   8  -3 5258.84  185.93
  -4   8   3 5358.01  183.80
  -4  -8   3 5858.01  199.51
   4  -8  -3 5823.92  198.14
   4  -8  -3 5301.43  231.17
   4   8  -2  504.91   66.70
  -4   8   2  401.08   49.59
  -4   8   2  517.60   59.68
   4   8  -2  431.79   33.96
   4  -8  -2  565.30   78.45
   4  -8  -2  521.73   77.71
  -4  -8   2  605.47   64.38
   4   8  -119341.43  647.25
  -4   8   118700.35  619.50
   4   8  -120702.97  667.64
  -4   8   117230.18  557.86
   4  -8  -118749.74  631.24
  -4  -8   120477.51  660.57
   4  -8  -118697.07  604.05
   4   8   0  107.16   30.02
  -4   8   0   34.71   18.56
   4   8   0   82.47   19.31
  -4   8   0   48.20   15.84
  -4  -8   0   84.05   16.83
   4  -8   0  128.57   33.78
   4  -8   0  120.94   61.19
   4   8   1 2325.20   99.22
  -4   8  -1 1937.10  100.48
   4   8   1 2885.54  112.94
   4   8   1 2152.68   73.81
  -4   8  -1 2813.02  106.34
   4  -8   1 2885.46  238.75
   4  -8   1 1584.51  105.41
  -4  -8  -1 2357.78   85.26
   4   8   2 2705.50  162.94
  -4   8  -2 2203.73  156.27
  -4   8  -2 2477.44   99.87
   4  -8   2 2569.74  302.20
   4  -8   2 2672.45  140.70
  -4  -8  -2 2481.26   99.26
   4   8   3 7794.67  269.56
  -4   8  -3 9011.11  357.46
  -4   8  -3 7921.68  270.85
   4  -8   3 9830.01  389.60
   4  -8   3 9117.95  341.91
  -4  -8  -3 9524.19  317.81
  -4   8  -4 1917.28  249.05
   4   8   4 2500.14  287.82
  -4   8  -4 2245.26  100.28
  -4   8  -4 3087.34  160.20
  -4  -8  -4 3039.22  131.97
   4  -8   4 2142.18  171.07
   4   8   5 6027.97  383.02
  -4   8  -5 6568.24  375.96
  -4   8  -5 7576.33  455.93
  -4  -8  -5 8704.74  505.10
   4  -8   5 6574.39  411.20
  -4  -8  -5 6760.89  382.62
   4   8   6  300.67  111.04
  -4   8  -6  356.01   55.86
  -4   8  -6  179.47   55.71
  -4  -8  -6  200.26   55.72
   4  -8   6  420.85   91.81
  -4  -8  -6  219.56   57.95
  -4  -8  -6  238.80   41.98
   4   8   7  101.60   94.39
  -4   8  -7  117.29   34.47
  -4  -8  -7   51.02   22.04
   4  -8   7   11.15   71.62
  -4  -8  -7  136.17   34.97
  -4  -8  -7   80.02   16.01
   4   8   8  104.09   54.13
  -4   8  -8  236.22   83.25
   4  -8   8  179.15   86.72
  -4  -8  -8  205.39   68.15
  -4  -8  -8  223.49   58.30
   4   8   9 2370.47  305.18
  -4   8  -9 2661.39  305.41
   4  -8   9 1727.61  437.69
  -4   8 -10   90.66   62.42
  -4  -8 -10  126.66   43.09
   4  -8  10  154.11  120.51
  -4   8 -11 1242.65  210.85
   4  10 -11  249.64   81.89
   4  10 -11  698.29  127.72
   4 -10 -11  230.65   77.02
   4 -10 -10  595.69   63.62
   4  10  -9 1333.90  212.48
   4 -10  -9 1687.84  276.99
   4  10  -8   29.51   15.43
   4 -10  -8    2.73   24.22
   4  10  -7   40.45   19.68
   4 -10  -7  117.56   38.64
   4  10  -6  240.32   49.02
  -4 -10   6  219.30   61.21
   4 -10  -6  220.18   65.49
   4  10  -5 4615.14  189.66
  -4  10   5 4963.48  202.98
   4 -10  -5 4830.02  204.14
  -4 -10   5 4281.86  175.90
   4  10  -4  583.63   70.86
   4  10  -4  531.40  111.62
  -4  10   4  470.04   48.56
  -4 -10   4  632.57   63.20
   4 -10  -4  597.72   59.66
  -4  10   3 7958.30  261.64
   4  10  -3 8313.09  277.08
   4  10  -3 8773.67  332.35
  -4  10   3 8226.88  266.85
  -4  10   3 8482.99  284.40
  -4 -10   3 9046.33  303.04
   4 -10  -3 8194.58  274.68
  -4 -10   3 8214.26  320.62
  -4  10   2   73.56   21.58
   4  10  -2   95.91   45.74
   4  10  -2   67.58   22.08
  -4  10   2   27.68   11.07
  -4  10   2   28.60   15.06
  -4 -10   2   80.51   77.41
   4 -10  -2   36.09   23.71
  -4 -10   2   35.63   20.52
   4  10  -1 2704.62  127.70
  -4  10   1 2273.90   98.53
  -4  10   1 2916.27  104.89
  -4 -10   1 2898.69  103.92
   4 -10  -1 2695.37  143.04
  -4 -10   1 2872.36  142.58
   4  10   0  604.88   64.61
  -4  10   0  650.75   79.38
  -4  10   0  509.21   43.76
   4  10   0  535.93  100.88
   4 -10   0  554.60   87.52
  -4 -10   0  717.33   76.44
   4 -10   0  708.12   79.47
  -4 -10   0  632.89   64.01
   4  10   115053.76  490.27
   4  10   115784.29  515.11
   4 -10   115734.75  561.72
  -4 -10  -119194.80  619.98
  -4  10  -2 2042.99  136.91
   4  10   2 2303.77  110.88
  -4  10  -2 1885.36   81.13
  -4  10  -2 1923.38   81.82
  -4 -10  -2 2206.74  102.45
   4 -10   2 1696.10  168.33
  -4  10  -3 6556.42  309.56
   4  10   3 4263.21  179.35
  -4  10  -3 4925.38  211.35
  -4  10  -3 4157.79  173.34
  -4 -10  -3 5508.15  215.32
   4 -10   3 4750.93  230.22
  -4  10  -4 1995.97  346.68
   4  10   4 2335.56  284.47
  -4  10  -4 1921.41   92.09
  -4  10  -4  881.64  117.87
  -4 -10  -4 1645.70   74.32
   4 -10   4 1848.56  139.36
   4  10   5  303.82   68.31
  -4  10  -5  287.01   49.76
  -4  10  -5  429.81  101.30
  -4 -10  -5  207.77   41.46
   4 -10   5  149.67   99.33
   4  10   6  148.11   58.89
  -4  10  -6  175.21   41.64
  -4 -10  -6   57.45   23.64
   4 -10   6  229.93  109.04
  -4 -10  -6   73.01   19.51
  -4 -10  -6  100.38   21.25
   4  10   7 2521.26  523.05
  -4  10  -7 2783.97  236.83
   4 -10   7 2489.45  251.20
   4  10   8  255.14  105.55
  -4  10  -8  217.95   63.78
   4 -10   8  212.76   92.22
  -4 -10  -8  108.77   21.17
   4  10   9 1270.30  303.56
  -4  10  -9 1486.36  158.87
   4 -10   9  876.28  422.58
  -4  10 -10  208.55   67.55
   4 -10  10  236.12  105.59
  -4  10 -11 1108.16  184.17
   4  12 -11   73.18   24.10
   4 -12 -11   15.05   14.90
   4  12 -10 1193.81  200.54
   4 -12 -10 1344.93  217.34
   4  12  -9   96.43   27.86
   4 -12  -9   30.96   22.39
   4  12  -8 1689.61  255.53
   4 -12  -8 1768.15  249.83
   4  12  -7 4420.87  334.67
   4 -12  -7 4645.81  356.54
   4  12  -6 2315.32  147.36
   4 -12  -6 2398.04  144.94
   4  12  -5 1028.13  170.97
  -4  12   5  887.89  112.18
  -4 -12   5  728.85  102.11
   4 -12  -5  806.45  125.67
  -4 -12   5 1170.07  181.12
   4  12  -4 2771.33  123.85
  -4  12   4 2790.09  219.23
   4  12  -4 2613.11  167.39
  -4 -12   4 2856.94  199.72
   4 -12  -4 2815.23  119.95
  -4 -12   4 2644.99  114.81
  -4  12   3  708.30  100.31
   4  12  -3  781.69  127.84
  -4  12   3  540.65   46.97
   4  12  -3  400.70   81.31
  -4  12   3  487.60   48.97
  -4 -12   3  617.22   59.85
  -4 -12   3  658.70  131.11
   4 -12  -3  606.59  102.24
  -4  12   2 5461.41  223.56
   4  12  -2 6170.94  209.22
  -4  12   2 6658.48  233.18
  -4  12   2 6410.54  215.06
   4  12  -2 6529.82  256.11
  -4 -12   2 6380.91  290.44
  -4 -12   2 6986.50  237.98
   4 -12  -2 6100.07  208.23
  -4  12   1  267.02   56.88
   4  12  -1  402.33   67.01
  -4  12   1  256.19   28.61
   4  12  -1  363.30   57.76
  -4  12   1  319.79   47.24
  -4 -12   1  325.34   64.99
  -4 -12   1  257.77   80.47
   4 -12  -1  421.50   66.96
  -4  12   0 5025.11  214.29
   4  12   0 4558.82  158.52
  -4  12   0 4556.17  157.50
   4  12   0 4762.64  237.75
  -4  12   0 4219.07  146.63
  -4 -12   0 4714.92  161.30
  -4 -12   0 4800.18  340.22
   4 -12   0 3797.49  145.79
  -4  12  -1 2027.34  148.21
   4  12   1 1915.60   80.45
   4  12   1 1841.28  158.19
  -4  12  -1 1701.95  146.00
  -4  12  -1 2373.44   96.78
  -4 -12  -1 1947.17  172.61
  -4 -12  -1 1826.14  151.81
   4 -12   1 2674.43  389.47
  -4  12  -2 3559.60  533.46
   4  12   2 3691.83  141.76
   4  12   2 3085.40  100.61
  -4  12  -2 3010.27  136.89
  -4  12  -2 2767.95  120.76
   4 -12   2 3159.63  189.52
  -4 -12  -2 3220.64  113.84
  -4  12  -3 4252.39  524.93
   4  12   3 3859.73  165.30
  -4  12  -3 4028.80  167.41
  -4  12  -3 2788.72  126.04
  -4 -12  -3 4322.78  175.31
   4 -12   3 3266.05  178.83
   4  12   4 2415.29  184.67
  -4  12  -4 3207.58  192.31
  -4  12  -4 1830.81  201.55
  -4 -12  -4 3232.20  208.26
   4 -12   4 3096.89  225.13
   4  12   5 3850.20  251.27
  -4  12  -5 3390.16  186.74
   4 -12   5 3713.70  255.23
   4  12   6  747.77  153.02
  -4  12  -6  752.96  195.97
  -4 -12  -6  513.65  114.86
   4 -12   6  653.88  143.06
  -4 -12  -6  452.09  100.22
  -4 -12  -6  885.35  135.94
   4  12   7  715.37  154.99
  -4  12  -7  639.08  125.00
  -4 -12  -7  277.02   67.92
   4 -12   7  653.51  163.52
  -4 -12  -7  370.34   67.25
  -4 -12  -7  360.21   73.27
   4  12   8  597.59  143.06
  -4  12  -8  727.06  102.75
   4 -12   8  749.00  249.53
  -4 -12  -8  404.61   81.63
   4  12   9 1164.26  308.92
  -4  12  -9 1848.70  237.99
   4 -12   9 1262.71  594.12
  -4  12 -10  229.74   66.09
   4 -12  10  150.60   87.58
  -4  12 -11  131.42   46.82
   4  14 -11 1365.04  183.84
   4 -14 -11 1390.03  194.25
   4  14 -10   -2.25   24.45
   4 -14 -10   22.80   20.95
   4  14  -9  428.59  138.78
   4 -14  -9  645.27   94.37
   4  14  -8  833.68  233.78
   4 -14  -8 1012.94  222.73
   4  14  -7 5020.76  412.53
   4 -14  -7 5235.15  444.36
   4  14  -6 5621.46  322.56
  -4 -14   6 6171.04  408.41
   4 -14  -6 5957.81  340.25
   4  14  -517400.21 2839.02
  -4 -14   517145.51  917.63
   4 -14  -517316.24 2824.76
  -4  14   4   61.62   11.06
   4  14  -4  115.67   27.23
   4  14  -4   -5.86   48.51
  -4  14   4   68.81   18.97
  -4 -14   4  124.74   75.57
   4 -14  -4  159.62   36.38
  -4  14   3 4515.40  185.21
   4  14  -3 4735.43  189.87
  -4  14   3 4741.08  182.19
   4  14  -3 5184.59  248.21
  -4  14   3 5234.73  209.40
  -4 -14   3 4939.58  199.52
  -4 -14   3 4110.27  263.31
   4 -14  -3 4713.63  194.65
  -4  14   2 4547.62  223.47
   4  14  -2 4095.91  165.80
  -4  14   2 3989.54  157.87
   4  14  -2 4051.83  195.28
  -4  14   2 3903.34  162.86
  -4 -14   2 4668.47  362.84
   4 -14  -2 5303.89  219.65
  -4  14   1 3878.81  171.30
   4  14  -1 3416.83  152.04
   4  14  -1 3426.33  122.52
  -4  14   1 3393.94  120.72
  -4  14   1 3542.35  129.29
  -4 -14   1 3724.54  185.81
   4 -14  -1 3665.60  140.71
  -4 -14   1 3228.22  118.12
  -4  14   0  419.97   94.54
   4  14   0  520.98   68.05
  -4  14   0  446.38   81.10
   4  14   0  252.19   41.17
  -4  14   0  349.75   53.07
  -4 -14   0  401.17   45.20
  -4 -14   0  389.04   85.74
   4 -14   0  262.58   54.26
  -4  14  -115357.67 1495.76
   4  14   114379.89  547.35
   4  14   118390.43 1660.51
  -4  14  -114991.98  571.84
  -4  14  -118135.95 1637.41
  -4 -14  -114697.36  577.48
  -4 -14  -114663.60  556.30
   4 -14   118878.52 1720.11
  -4  14  -2   86.31   31.59
   4  14   2  102.43   29.31
  -4  14  -2  186.54   43.37
  -4  14  -2  168.34   33.00
   4  14   2  106.54   18.49
  -4 -14  -2   90.86   34.72
  -4 -14  -2  183.88   24.43
   4 -14   2   90.78   46.05
   4  14   3 7924.54  321.43
  -4  14  -3 7310.39  292.66
  -4  14  -3 5700.93  236.51
  -4 -14  -3 7877.84  305.65
   4 -14   3 5744.80  273.54
   4  14   4 4603.16  330.83
  -4  14  -4 5403.38  312.96
  -4 -14  -4 5911.06  336.38
   4 -14   4 6017.44  402.22
   4  14   5 1705.96  228.97
  -4  14  -5 1617.45  245.51
  -4 -14  -5 1476.45  182.85
   4 -14   5 1743.06  449.16
   4  14   6  742.05  141.77
  -4  14  -6  692.93  170.63
  -4 -14  -6  481.62   85.51
   4 -14   6  593.22  140.75
   4  14   7 2210.33  304.83
  -4  14  -7 3187.83  387.58
  -4 -14  -7 2365.44  284.80
   4 -14   7 2964.23  398.88
  -4 -14  -7 2018.04  242.20
  -4 -14  -7 3584.01  425.52
   4  14   8  144.86   84.18
  -4  14  -8  211.45   53.23
   4 -14   8  186.00   94.66
   4  14   9  524.95  135.49
  -4  14  -9  898.89  136.37
   4 -14   9  464.80  190.14
  -4  14 -10  264.56   70.79
   4 -14  10   36.67   83.11
   4  16 -11   59.50   20.38
   4 -16 -11   14.61   25.14
   4  16 -10  -30.29   24.93
   4 -16 -10    2.86   23.17
   4  16  -9   52.34   27.03
   4 -16  -9   84.03   26.88
   4  16  -8  125.54   44.82
   4 -16  -8  112.95   55.85
   4  16  -7 1091.54  138.49
  -4 -16   7 1348.29  239.44
   4 -16  -7 1054.84  166.72
   4  16  -6  633.79  112.81
  -4 -16   6  567.97  148.39
   4 -16  -6  589.05  112.38
   4  16  -5  797.08  138.83
  -4 -16   5  683.15  195.58
   4 -16  -5  745.03  114.70
  -4  16   4  364.28   63.58
   4  16  -4  388.83   79.29
  -4  16   4  277.04   40.55
  -4 -16   4  317.52  190.78
   4 -16  -4  382.51   68.23
  -4  16   3  545.53   83.07
   4  16  -3  864.56  104.65
  -4  16   3  784.27   89.19
  -4  16   3  777.26   90.28
   4 -16  -3 1053.68  107.65
  -4 -16   3  727.58  122.56
  -4  16   2 9866.67  409.27
   4  16  -2 8488.67  341.11
  -4  16   2 8966.16  345.52
   4  16  -2 8744.33  378.23
  -4  16   2 8870.78  351.67
  -4 -16   2 8919.54  350.25
  -4 -16   2 9259.33  410.28
   4 -16  -210654.71  422.79
  -4  16   1 4779.96  250.55
   4  16  -1 4574.47  184.81
  -4  16   1 4974.06  196.62
   4  16  -1 4361.63  312.02
  -4  16   1 4784.00  218.45
  -4 -16   1 4884.36  196.70
  -4 -16   1 4798.26  274.05
   4 -16  -1 4229.05  182.59
  -4  16   0 1487.19  255.37
   4  16   0 1543.41  145.69
  -4  16   0 1485.55  139.65
   4  16   0 1405.30  217.90
  -4  16   0 1186.50  103.76
  -4 -16   0 1567.82  207.17
  -4 -16   0 1235.93  239.98
   4 -16   0 1039.64  150.72
   4  16   1 2110.53   91.96
   4  16   1 1424.20  120.64
  -4  16  -1 2102.71  135.74
  -4  16  -1 2659.36  148.75
  -4 -16  -1 2109.33  143.77
  -4 -16  -1 2047.72   88.50
   4 -16   1 2727.45  229.20
  -4  16  -2    9.40   45.43
   4  16   2   90.60   32.92
   4  16   2   68.23   14.74
  -4  16  -2  173.56   35.62
  -4 -16  -2  103.60   34.90
   4 -16   2   74.24   61.53
  -4 -16  -2   94.49   20.72
   4  16   3  503.70  102.14
   4  16   3  281.84   34.74
  -4  16  -3  427.13   92.75
  -4 -16  -3  332.66   50.24
   4 -16   3  119.37   67.29
  -4 -16  -3  330.32   62.65
   4  16   4 3096.31  176.35
  -4  16  -4 3727.28  204.85
  -4 -16  -4 3566.63  192.73
   4 -16   4 3460.47  620.95
   4  16   5 2592.47  391.09
  -4  16  -5 1702.33  139.98
   4 -16   5 1531.77  193.77
   4  16   6   99.23   42.04
  -4  16  -6   60.02   32.96
  -4 -16  -6   47.55   16.52
   4 -16   6  155.22  123.25
   4  16   7  475.51  113.81
  -4  16  -7  465.27   97.44
   4 -16   7  550.75  217.73
   4  16   8   43.22   50.96
  -4  16  -8   78.87   57.88
   4 -16   8   35.85   99.23
  -4  16  -9  211.89   65.30
   4 -16   9  219.41   88.53
  -4  16 -10  484.64  229.26
   4 -16  10  409.41  155.19
   4  18 -10  366.94  169.74
   4 -18 -10  517.94  152.59
   4  18  -9 1431.44  227.53
   4 -18  -9 1571.63  246.64
   4  18  -8 1168.12  145.70
   4 -18  -8  983.59  203.56
   4  18  -7  661.75  126.92
  -4 -18   7 1130.14  289.23
   4  18  -6  853.70  171.54
  -4 -18   6  638.91  254.94
   4 -18  -6  630.08  103.91
   4  18  -5 3103.99  239.01
  -4 -18   5 2411.33  535.62
   4 -18  -5 3120.02  184.56
  -4  18   4 2900.48  184.25
   4  18  -4 3354.22  182.05
  -4  18   4 3073.30  157.19
  -4 -18   4 2857.29  288.73
   4 -18  -4 4219.20  232.02
  -4  18   3 2547.43  278.61
   4  18  -3 2453.66  152.54
  -4  18   3 2369.09  139.45
  -4 -18   3 2544.18  346.27
   4 -18  -3 2794.06  187.60
  -4  18   2 1236.36  229.58
   4  18  -2 1166.23  145.96
  -4  18   2 1173.03  142.22
   4  18  -2  866.63  138.79
  -4 -18   2 1376.89  367.93
   4 -18  -2 1205.87  215.26
  -4  18   1 1190.54  167.05
   4  18  -1 1192.98  142.14
  -4  18   1 1187.86  128.91
   4  18  -1 1376.28  163.54
  -4 -18   1 1118.62  269.69
   4 -18  -1  885.60  136.67
  -4  18   0 3953.21  216.87
   4  18   0 4236.21  174.01
   4  18   0 4312.59  195.09
  -4  18   0 3933.52  162.84
  -4 -18   0 3854.80  195.24
   4 -18   0 5012.01  254.48
  -4 -18   0 4079.40  168.27
  -4  18  -1 3531.81  571.12
   4  18   1 4236.12  258.25
   4  18   1 3176.85  184.93
  -4  18  -1 3917.30  228.39
  -4 -18  -1 4425.09  273.16
   4 -18   1 5187.50  618.51
  -4 -18  -1 4092.00  235.74
   4  18   2 4017.70  239.27
   4  18   2 3090.60  184.92
  -4  18  -2 4098.35  241.67
  -4 -18  -2 4061.52  350.02
   4 -18   2 3793.79  261.04
  -4 -18  -2 3836.64  220.86
   4  18   3  624.59  109.19
   4  18   3  383.10   45.45
  -4  18  -3  444.06   63.68
  -4 -18  -3  465.00   68.76
   4 -18   3  204.24   84.32
  -4 -18  -3  372.92   77.39
   4  18   4  488.80   80.35
  -4  18  -4  361.26   62.96
  -4 -18  -4  317.12   65.13
   4 -18   4  123.02   98.65
  -4 -18  -4  416.22   59.53
   4  18   5 3265.06  303.33
  -4  18  -5 4908.04  416.70
  -4 -18  -5 4489.66  365.30
   4 -18   5 5250.39  473.26
   4  18   6 1998.36  333.17
  -4  18  -6 2632.40  323.26
   4 -18   6 2236.03  317.43
   4  18   7 1759.72  338.12
  -4  18  -7 2579.57  421.20
   4 -18   7 2570.23  464.00
   4  18   8  267.16  107.88
  -4  18  -8  409.75   98.40
   4 -18   8  450.52  151.18
  -4  18  -9   64.94   48.40
   4 -18   9  121.48   81.59
  -4  18 -10   65.65   40.06
   4 -18  10  140.02  104.37
   4  20 -10  385.59  171.27
   4 -20 -10  462.20  169.77
   4  20  -9  532.68  203.61
   4 -20  -9  775.39  104.78
   4  20  -8  104.59   36.64
  -4 -20   8  146.60  106.99
   4  20  -7 2044.45  358.29
  -4 -20   7 1657.78  533.33
   4 -20  -7 1966.16  357.34
   4  20  -6  522.69  122.66
  -4 -20   6  330.09  121.42
   4 -20  -6  479.23   96.38
   4  20  -5 1268.59  152.95
  -4 -20   5  842.98  303.99
   4 -20  -5 1760.44  269.93
  -4  20   4 1376.27  189.80
   4  20  -4 2094.20  130.95
  -4  20   4 1929.07  115.60
  -4 -20   4 1732.43  404.53
   4 -20  -4 3100.75  337.74
  -4  20   3 4408.20  255.27
   4  20  -3 4260.84  226.85
  -4  20   3 4507.03  233.46
  -4 -20   3 4453.71  342.49
   4 -20  -3 4953.71  270.64
   4  20  -2   76.83   31.91
  -4  20   2   69.21   27.46
   4  20  -2   -2.21   43.29
  -4 -20   2  186.49   72.16
   4 -20  -2   24.73   18.91
  -4  20   1 1262.44  204.26
   4  20  -1 1193.97  146.43
  -4  20   1 1243.44  152.55
   4  20  -1  961.71  168.02
  -4 -20   1 1235.17  264.83
   4 -20  -1 1046.46  222.02
  -4  20   0 2042.97  334.74
   4  20   0 2330.70  141.47
  -4  20   0 2363.42  145.05
   4  20   0 2567.65  173.46
   4 -20   0 2984.11  235.26
  -4 -20   0 2189.87  166.34
   4  20   1 3450.68  185.56
  -4  20  -1 3452.76  188.62
   4  20   1 3241.91  203.12
   4 -20   1 4160.32  277.19
  -4 -20  -1 3310.66  207.52
   4  20   2 4040.91  215.08
  -4  20  -2 4178.22  246.91
   4  20   2 3722.57  193.42
   4 -20   2 3184.62  219.21
  -4 -20  -2 4119.70  263.83
   4  20   3 5889.94  342.55
  -4  20  -3 4742.12  298.51
   4  20   3 4679.72  261.83
   4 -20   3 3879.92  273.32
  -4 -20  -3 4564.55  273.99
   4  20   4   36.22   19.39
  -4  20  -4  183.31   40.37
   4  20   4   76.55   17.60
  -4 -20  -4  107.12   31.31
   4 -20   4   17.91   80.89
   4  20   5 1157.20  197.36
  -4  20  -5 1317.43  199.57
  -4 -20  -5  623.15  123.67
   4 -20   5 1030.59  194.85
   4  20   6 1650.23  349.86
  -4  20  -6 1814.94  258.20
   4 -20   6 1156.93  400.64
   4  20   7  405.25   92.51
  -4  20  -7  610.24  116.32
   4 -20   7  418.32  128.12
   4  20   8  700.49   85.06
  -4  20  -8 1086.53  246.47
   4 -20   8 1335.99  269.64
  -4  20  -9 1180.79  303.49
   4 -20   9 1094.26  502.74
   4  22 -10  294.47  121.31
   4  22  -9   93.56   29.11
   4 -22  -9  127.22   34.31
   4  22  -8   70.32   21.04
  -4 -22   8   85.85  102.93
   4 -22  -8   25.12   16.90
   4  22  -7  646.41  160.41
  -4 -22   7  380.50  174.21
   4 -22  -7  785.83  123.58
   4  22  -6   15.30   19.76
  -4 -22   6  148.48   74.64
   4 -22  -6   11.05   48.26
  -4  22   5   39.84   11.87
   4  22  -5  112.97   29.96
  -4 -22   5   89.14   38.23
   4 -22  -5  342.34   82.38
  -4  22   4 2797.45  321.03
   4  22  -4 2956.61  247.84
  -4  22   4 2738.67  222.25
  -4 -22   4 2176.41  559.08
   4 -22  -4 3204.12  290.44
  -4  22   3   99.46   48.43
   4  22  -3  237.08   52.32
  -4  22   3  191.44   42.75
  -4 -22   3  275.82   68.66
   4 -22  -3  222.65   42.64
  -4  22   2   35.01   50.79
   4  22  -2   71.97   28.64
  -4  22   2   75.35   29.51
  -4 -22   2  205.45  122.05
   4 -22  -2   71.07   34.12
  -4  22   1  567.88  134.06
   4  22  -1  690.68  126.58
  -4  22   1  774.64  122.09
   4  22  -1  574.15  126.89
  -4 -22   1  566.40  111.43
   4 -22  -1  446.28  117.20
  -4  22   0  605.14  138.32
   4  22   0  870.17  116.54
  -4  22   0  658.26   85.03
   4  22   0  861.59  182.36
  -4 -22   0  952.37  283.84
   4 -22   0  784.70  139.27
   4  22   1   33.21   16.06
  -4  22  -1    3.28   18.51
   4  22   1   16.19   12.20
   4 -22   1  219.60  114.72
  -4 -22  -1   18.31   54.75
   4  22   2 1430.84  220.93
  -4  22  -2 1289.89  158.79
   4  22   2 1034.69  136.73
   4 -22   2 1772.97  235.30
  -4 -22  -2 1359.66  227.89
   4  22   3  602.37  127.93
  -4  22  -3  867.71  203.61
   4  22   3  514.68   92.15
   4 -22   3  484.64  136.33
  -4 -22  -3  571.64  103.03
  -4  22  -4   64.41   29.61
   4  22   4   35.33   10.52
   4 -22   4  242.27  106.13
   4  22   5  147.26   51.72
  -4  22  -5  299.84   98.42
   4 -22   5  211.35  112.71
  -4 -22  -5  152.36   49.25
   4  22   6  870.98  174.47
  -4  22  -6  928.84  179.07
   4 -22   6  533.40  210.78
   4  22   7  348.25  110.73
  -4  22  -7  522.80  158.84
   4 -22   7  712.12  192.35
  -4  22  -8  934.90  186.28
   4 -22   8 1081.30  286.78
  -4  22  -9  925.25  143.79
   4 -22   9  366.95  149.35
   4  24  -9  342.64  122.65
   4 -24  -9  432.75  133.68
   4  24  -8  649.09  189.18
  -4 -24   8 1153.68  286.34
   4 -24  -8 1144.38  251.42
   4  24  -7  855.26  235.86
  -4 -24   7  824.89  331.76
   4 -24  -7 1307.86  279.82
   4  24  -6 1803.25  296.51
  -4 -24   6 1143.42  596.00
   4 -24  -6 2381.86  433.30
  -4  24   5    4.57    2.30
   4  24  -5   42.00   20.32
  -4 -24   5  228.02  114.46
   4 -24  -5   29.42   29.15
  -4  24   4  912.86  260.36
   4  24  -4 1597.05  200.53
  -4  24   4 1536.39  184.52
  -4 -24   4 1965.17  343.73
   4 -24  -4 1378.30  248.13
  -4  24   3  207.80   86.85
  -4  24   3  412.92   69.33
   4  24  -3  431.83   61.97
  -4 -24   3  490.36  148.85
   4 -24  -3  280.64   61.03
  -4  24   2 2156.05  375.11
   4  24  -2 2997.92  237.31
  -4  24   2 3186.09  241.89
  -4 -24   2 3621.78  321.40
   4 -24  -2 1980.42  249.91
   4  24  -1 4320.32  325.69
  -4  24   1 4589.91  345.02
  -4 -24   1 4719.35  401.21
   4 -24  -1 5617.09  469.96
   4  24   0  833.69  184.60
  -4  24   0  883.09  138.53
   4  24   0  334.98   89.15
   4 -24   0  503.32  133.40
  -4 -24   0  501.54  166.85
   4  24   1  217.89   35.30
  -4  24  -1  182.72   41.88
   4  24   1  149.20   48.76
   4 -24   1  151.60   85.14
  -4 -24  -1  185.66   66.99
   4  24   2  345.98   70.71
  -4  24  -2  437.13   86.10
   4  24   2  244.89   37.23
   4 -24   2  499.75  125.76
  -4 -24  -2  302.51   82.46
   4  24   3 2191.72  200.61
  -4  24  -3 2366.45  202.72
   4  24   3 2197.23  262.89
   4 -24   3 1966.99  232.85
   4  24   4 1357.31  229.38
  -4  24  -4 1303.17  137.18
  -4 -24  -4 1438.00  153.90
   4 -24   4 1567.69  242.80
   4  24   5  586.43   86.89
  -4  24  -5  737.14  160.97
   4 -24   5 1074.43  205.60
  -4 -24  -5  778.36  107.51
   4  24   6 1131.38  227.23
  -4  24  -6 1944.67  213.32
   4 -24   6 1490.57  549.59
   4  24   7  396.38  104.59
  -4  24  -7  319.91   89.66
   4 -24   7  335.98  160.38
  -4  24  -8  276.24   64.33
  -4  24  -9  217.47   49.83
   4 -24   9  517.54  220.33
   4  26  -9  270.13   47.02
  -4 -26   9  386.83  136.86
   4  26  -8 1470.47  234.78
  -4 -26   8 1178.03  320.92
   4 -26  -8  972.86  169.82
   4  26  -7  208.79   67.28
   4 -26  -7  107.68   52.28
   4  26  -6  131.59   34.40
  -4 -26   6  229.94  178.97
   4 -26  -6   70.28   40.87
   4  26  -5 2310.49  376.22
  -4 -26   5 1666.99  531.29
   4 -26  -5 1644.61  343.19
   4  26  -4  442.13  114.88
  -4  26   4  229.06   75.64
  -4 -26   4  508.75  153.44
   4 -26  -4  269.66   85.79
  -4 -26   3  840.36  251.01
   4 -26  -3  490.51  126.70
  -4  26   2  534.05  169.60
   4  26  -2 1262.43  208.31
  -4  26   2  970.28  171.55
  -4 -26   2 1107.63  205.39
   4 -26  -2 1311.48  346.16
   4  26  -1 1581.24  151.99
  -4 -26   1 1840.43  205.34
   4 -26  -1 2587.57  277.81
   4  26   0   40.71   19.15
  -4  26   0   33.85   25.36
   4  26   0   27.26   15.60
   4 -26   0  -40.15   86.63
  -4 -26   0   56.92   36.05
   4  26   1 1905.09  233.26
  -4  26  -1 1942.03  239.11
  -4 -26  -1 1943.73  272.85
   4 -26   1 1653.69  248.20
   4  26   2   33.38   31.60
  -4  26  -2   46.12   26.86
   4  26   2   30.74   17.62
   4 -26   2  208.34  145.54
  -4 -26  -2   60.77   33.85
   4  26   3 1406.47  189.58
  -4  26  -3 1926.84  194.38
  -4 -26  -3 2171.85  235.71
   4 -26   3 1478.52  455.91
   4  26   4 1680.03  308.45
  -4  26  -4 2008.82  330.33
   4 -26   4 1957.37  374.44
  -4 -26  -4 1644.48  280.53
   4  26   5  463.96   92.63
  -4  26  -5  616.05   93.65
   4 -26   5  287.06  185.71
   4  26   6  155.03   58.83
  -4  26  -6  276.70   73.19
   4 -26   6  303.24  134.31
  -4  26  -7  695.14  124.66
   4 -26   7  483.87  202.69
  -4  26  -8  135.43   64.99
   4 -26   8  337.66  210.42
   4  28  -8  303.47  155.76
  -4 -28   8  370.63  250.10
   4 -28  -8  484.93  131.61
   4  28  -7  214.62   67.85
  -4 -28   7   -8.21   91.33
   4 -28  -7  100.78   36.27
   4  28  -6  774.10  112.72
  -4 -28   6  409.74  214.73
   4 -28  -6  391.38  119.43
   4  28  -5   86.61   36.12
  -4 -28   5  134.54  115.26
   4 -28  -5   51.07   45.47
   4  28  -4 1254.82   59.80
  -4  28   4  757.98  119.66
  -4 -28   4  861.03  246.11
   4 -28  -4  697.47  159.85
  -4  28   3  178.51   61.30
   4  28  -3  261.25   63.32
  -4 -28   3  277.57  115.92
   4 -28  -3   96.03   52.89
   4  28  -2 3373.71  325.69
  -4  28   2 4010.61  385.19
  -4 -28   2 3051.83  820.95
   4 -28  -2 3749.59  391.80
   4  28  -1    3.16   21.74
  -4  28   1   18.04   18.53
  -4 -28   1  282.02  120.88
   4 -28  -1  171.82   61.24
   4  28   0 2839.47  275.58
  -4  28   0 2903.62  282.48
  -4 -28   0 2707.95  415.63
   4 -28   0 1733.76  504.78
   4  28   1  304.91   80.52
  -4  28  -1  297.03   98.35
   4  28   1  233.49   74.92
   4 -28   1  220.08   96.70
  -4 -28  -1  278.31  152.16
   4  28   2  582.29  115.98
  -4  28  -2  512.55  102.23
  -4 -28  -2  447.60  107.07
   4 -28   2  275.74   99.27
   4  28   3  129.56   39.86
  -4  28  -3  169.18   64.09
  -4 -28  -3  178.55   70.39
   4 -28   3  108.18  112.80
   4  28   4 1492.52  248.74
  -4  28  -4 1489.60  320.78
   4 -28   4 1714.09  270.77
   4  28   5  463.92  144.71
  -4  28  -5  733.88  125.62
   4 -28   5  478.67  139.20
  -4  28  -6 1578.79  304.01
   4 -28   6 2582.24  542.80
  -4  28  -7  260.96   78.50
   4 -28   7  270.30  130.76
   4  30  -7  433.39  149.04
  -4 -30   7  488.18  279.98
   4 -30  -7  238.22   65.49
   4  30  -6 1022.25  199.29
  -4 -30   6  468.44  175.37
   4 -30  -6  821.65  241.10
  -4 -30   5  439.61  203.47
   4 -30  -5  850.81  180.67
   4  30  -4  578.93  209.89
  -4 -30   4  948.36  267.74
   4 -30  -4  164.58   52.73
  -4  30   3 1533.94  188.61
   4  30  -3 1750.79  201.30
  -4 -30   3 1835.85  286.03
   4 -30  -3 1879.80  265.41
  -4  30   2 4973.42  542.27
   4  30  -2 4975.45  545.59
  -4 -30   2 4938.56  586.60
   4 -30  -2 5782.25  226.05
   4  30  -1   86.47   33.53
  -4  30   1   70.48   34.32
  -4 -30   1  144.58   94.58
   4 -30  -1  -36.88   78.70
   4  30   0 1463.13  246.25
  -4  30   0 1490.45  276.52
  -4 -30   0 1139.10  369.90
   4 -30   0 1636.84  305.13
   4  30   1 2879.89  320.84
  -4  30  -1 2917.92  325.54
  -4 -30  -1 2632.52  387.97
   4 -30   1 2545.30  383.17
   4  30   2  537.36  125.63
  -4  30  -2  689.29   95.58
   4 -30   2  435.16  137.85
   4  30   3   52.24   20.22
  -4  30  -3  283.19   61.42
   4 -30   3  488.25  240.14
   4  30   4 4129.54  672.90
  -4  30  -4 3670.60  567.74
   4 -30   4 4611.52  263.09
   4  30   5  392.45   90.86
  -4  30  -5  560.58  102.82
   4 -30   5  406.47  246.45
  -4  30  -6  385.10  111.03
   4 -30   6  479.83  224.39
  -4  30  -7  560.23  212.21
   4 -30   7  362.53  130.36
   4  32  -6   44.86   18.41
  -4 -32   6  174.58   58.46
   4 -32  -6   47.10   24.93
   4  32  -5  451.61  214.78
  -4 -32   5  357.89  232.62
   4 -32  -5  260.28   94.94
   4  32  -4  187.05   67.21
  -4 -32   4 -127.99  107.89
   4 -32  -4  211.88   84.56
  -4  32   3  209.74   63.43
   4  32  -3  443.52  125.11
  -4 -32   3  432.95  184.35
   4 -32  -3  239.36   92.08
  -4  32   2  191.61   65.22
   4  32  -2  184.75   44.92
  -4 -32   2  269.98  170.14
   4 -32  -2  125.83  124.84
   4  32  -1  535.22  110.70
  -4  32   1  420.34  124.12
  -4 -32   1  302.51  113.14
   4 -32  -1  351.33  177.60
   4  32   0  102.11   43.55
  -4  32   0  156.32   49.32
  -4 -32   0  207.50   99.56
   4 -32   0  333.19  113.86
   4  32   1 2514.29  255.03
  -4  32  -1 2524.90  291.48
  -4 -32  -1  770.12  406.53
   4 -32   1 2122.58  286.43
   4  32   2  152.96   34.65
  -4  32  -2  322.84   79.46
   4 -32   2  335.37  189.00
  -4 -32  -2  146.26   81.47
   4  32   3  117.07   47.23
   4 -32   3  316.77  202.87
   4  32   4    6.31   16.62
  -4  32  -4   85.37   47.48
   4 -32   4  224.31  185.54
   4  32   5  205.96   85.42
  -4  32  -5  490.99  113.03
   4 -32   5  403.42  154.27
  -4  32  -6  495.69  100.30
   4 -32   6  487.91  181.09
   4  34  -5  378.93  165.59
  -4 -34   5  355.42  161.24
   4 -34  -5  222.37   98.25
   4  34  -4  282.87  145.88
  -4 -34   4  837.49  265.35
   4  34  -3  112.54   40.26
  -4 -34   3  160.61  114.41
   4 -34  -3  201.06   74.23
  -4  34   2 2194.50  411.38
   4  34  -2 2045.34  399.01
  -4 -34   2 2720.63  548.27
   4 -34  -2 1630.66  411.38
  -4  34   1   65.44   32.22
   4 -34  -1  255.73  138.58
   4  34   0  466.71   87.46
  -4 -34   0  108.29   97.75
   4 -34   0  151.29  100.18
   4  34   1  337.87   95.25
  -4  34  -1  412.97  123.46
  -4 -34  -1  382.61  144.21
   4 -34   1  466.76  232.59
   4  34   2  856.53  222.32
  -4  34  -2  716.42  207.03
   4 -34   2  528.18  305.52
  -4  34  -3   92.56   46.35
   4 -34   3  111.17  131.84
  -4  34  -4  720.50  108.32
   4 -34   4  930.44  240.87
  -4  34  -5   52.70   42.89
   4 -34   5   88.40  130.56
   4  36  -3   81.39   25.73
  -4 -36   3   57.50   60.91
   4 -36  -3   74.52   51.65
  -4  36   2   98.62   29.28
   4  36  -2   43.36   26.47
  -4 -36   2  267.82  136.86
   4 -36  -2  232.49   96.19
   4  36  -1  243.03  107.90
  -4  36   1  242.21   60.01
  -4 -36   1  135.87   90.84
   4 -36  -1  165.31   93.89
   4  36   0 1248.98  219.64
  -4  36   0 1014.52  269.33
   4 -36   0 1341.97  264.48
   4  36   1   74.16   16.33
  -4  36  -1  115.85   34.41
   4 -36   1  259.31  130.80
   4  36   2 1205.94  233.68
  -4  36  -2 1151.53  250.50
   4 -36   2 1436.94  238.62
   4  36   3   74.13   32.06
  -4  36  -3  132.63   72.65
   4 -36   3  303.21  135.07
   4 -38  -2  317.10  136.28
  -4  38   1  172.28   51.70
  -4 -38   1  157.41  103.96
   4  38   0   18.04   20.42
  -4  38   0   37.18   27.62
  -4 -38   0   13.24   82.74
   4 -38   0   -5.16   95.45
   4  38   1   28.81   17.31
  -4  38  -1   11.95   29.89
   4 -38   1  281.57  173.97
   5   1 -12   35.62   40.22
   5  -1 -12  140.25   50.51
   5   1 -11   89.49   29.00
   5  -1 -11  181.50   54.91
   5   1 -10   90.19   31.70
   5   1 -10  178.87   54.51
   5  -1 -10   82.42   21.46
   5  -1 -10  215.97   53.00
   5   1  -9 1123.69  210.21
   5   1  -9 1278.47  139.24
   5  -1  -9 1316.94  127.61
   5  -1  -9 1656.72  171.12
   5   1  -8   68.48   35.31
   5   1  -8   26.00   15.82
  -5  -1   8   62.69   17.34
   5  -1  -8   68.74   33.01
   5  -1  -8   13.21   14.75
   5   1  -7 1320.60  165.05
   5   1  -7 1496.69  176.55
  -5   1   7 1409.23  166.77
  -5  -1   7 1305.88  154.42
   5  -1  -7 1442.63  171.26
   5  -1  -7 1316.34  209.32
   5   1  -6  399.10   51.38
   5   1  -6  402.53   68.48
  -5   1   6  415.74   65.72
  -5  -1   6  423.36   68.38
   5  -1  -6  452.39   81.11
   5  -1  -6  446.64   76.25
   5   1  -5  116.19   20.91
   5   1  -5  118.50   43.07
  -5   1   5   38.72    9.20
  -5  -1   5   76.38   18.93
   5  -1  -5   82.35   28.66
   5  -1  -5   61.03   13.91
   5   1  -4 2905.34  107.74
  -5   1   4 2852.30   98.67
   5   1  -4 2843.10  111.79
   5  -1  -4 2675.59   96.96
  -5  -1   4 2655.27   94.29
   5  -1  -4 2140.75   86.36
   5   1  -3 5575.16  187.70
  -5   1   3 6073.61  208.11
  -5   1   3 5902.56  193.96
   5   1  -3 5752.79  197.25
   5  -1  -3 5957.98  204.55
  -5  -1   3 6043.81  199.94
   5   1  -2 4932.88  168.17
   5   1  -2 6924.95  236.74
  -5   1   2 5380.61  184.02
  -5   1   2 5325.98  177.43
   5  -1  -2 5545.61  192.45
   5  -1  -2 5352.01  184.12
  -5  -1   2 5652.36  187.90
  -5  -1   2 5371.86  183.03
   5   1  -1 5066.81  153.22
   5   1  -1 5012.58  133.62
  -5   1   1 4855.65  129.62
  -5  -1   1 4529.71  120.46
   5  -1  -1 5227.32  139.37
  -5  -1   1 4965.11  133.54
   5   1   0  569.36   64.78
  -5   1   0  564.74  104.22
   5   1   0  502.15   91.13
  -5   1   0  613.89   51.23
   5  -1   0  744.35  151.11
  -5  -1   0  645.21   55.13
  -5  -1   0  546.11   48.57
   5  -1   0  513.39   48.67
   5   1   1   70.61   18.08
   5   1   1   28.30   59.99
  -5   1  -1   32.96   15.10
  -5   1  -1   21.59   23.56
   5  -1   1   -3.99   55.03
   5  -1   1   52.90   19.69
  -5  -1  -1   74.05   25.50
  -5  -1  -1   25.65   11.81
   5   1   2 5048.43  251.54
  -5   1  -2 4697.37  155.40
   5   1   2 6059.12  247.64
  -5  -1  -2 4301.10  200.28
   5  -1   2 6039.50  226.73
   5  -1   2 4688.69  358.66
  -5  -1  -2 4952.91  164.02
   5   1   3  295.50   65.16
   5   1   3  521.71   98.20
  -5   1  -3  801.51  147.83
  -5   1  -3  498.68   56.83
   5  -1   3  473.71   71.08
   5  -1   3  293.83   67.45
  -5  -1  -3  608.82   71.83
  -5  -1  -3  334.88   60.89
  -5   1  -4 3389.18  254.37
   5   1   4 2164.50  182.20
  -5   1  -4 2148.55   94.37
   5   1   4 2561.31  126.35
   5  -1   4 2695.85  314.43
   5  -1   4 2426.84  169.57
  -5  -1  -4 2220.43  104.33
  -5  -1  -4 1776.51  140.22
   5   1   5 5073.72  425.51
  -5   1  -5 2741.93  161.78
  -5   1  -5 5227.49  335.71
   5   1   5 3946.00  248.08
   5  -1   5 4607.72  511.66
   5  -1   5 4274.69  264.41
  -5  -1  -5 2723.25  167.11
  -5  -1  -5 3004.17  190.86
  -5   1  -6   35.24   45.59
   5   1   6   27.67   89.25
   5   1   6   71.97   52.07
   5  -1   6   92.13   43.89
   5  -1   6   29.78   46.01
  -5  -1  -6   44.15   27.60
   5   1   7  670.17  139.47
   5   1   7  672.99  107.85
   5  -1   7  668.58  173.75
   5  -1   7  419.03  167.22
  -5  -1  -7  499.23  144.44
   5   1   8  207.40  123.74
  -5   1  -8  507.57   99.73
  -5   1  -8  323.49   99.78
   5  -1   8  470.18  124.56
  -5   1  -9  144.34   50.03
  -5  -1  -9  149.54   58.47
  -5   1 -10  106.52   28.56
  -5  -1 -10  141.61   50.37
  -5   1 -11  322.76  102.72
  -5  -1 -11  331.44   84.91
   5   3 -12  305.08   64.56
   5   3 -11  501.95  109.33
   5  -3 -11  457.25   90.80
   5   3 -10  352.79   78.44
   5  -3 -10  320.89   64.21
   5   3  -9   77.09   37.83
   5   3  -9  164.89   56.06
   5  -3  -9   55.13   20.62
   5  -3  -9  122.29   46.64
   5   3  -8  258.49   88.80
   5   3  -8  433.39   91.76
   5  -3  -8  223.18   69.26
  -5  -3   8  336.44   62.24
   5  -3  -8  394.30   74.04
   5  -3  -8  257.47   52.68
   5   3  -7   15.84   12.00
  -5   3   7   30.33    9.74
   5   3  -7   73.95   33.83
   5  -3  -7   34.93   14.52
  -5  -3   7   31.73   15.91
   5  -3  -7   38.52   28.68
   5   3  -6   54.83   15.43
  -5   3   6    1.78    7.50
   5   3  -6   11.73    9.68
   5  -3  -6   16.71    8.36
  -5  -3   6   12.59   11.41
   5  -3  -6   46.69   26.96
   5   3  -5 1935.43  321.01
   5   3  -5 2514.05  104.10
  -5   3   5 2473.52  100.12
   5   3  -5 2322.93  116.96
  -5  -3   5 2244.77   95.93
   5  -3  -5 2214.51  102.96
   5  -3  -5 2014.34   81.75
  -5   3   4 2113.60   73.79
   5   3  -4 2521.90   90.69
  -5   3   4 2117.22   86.98
   5   3  -4 2269.64   94.24
   5  -3  -4 2594.85   97.40
  -5  -3   4 2293.75   86.55
   5  -3  -4 2149.54   86.49
   5   3  -3    8.45    7.92
  -5   3   3   38.82   12.74
   5   3  -3   22.49   24.10
  -5   3   3   43.42   15.41
   5  -3  -3   15.36   14.80
  -5  -3   3    9.31   12.52
   5  -3  -3  -20.18   20.86
  -5   3   2 8786.30  286.12
   5   3  -2 8456.51  278.12
  -5   3   2 9497.71  313.40
   5   3  -2 9417.46  312.10
  -5  -3   2 9744.84  318.28
   5  -3  -2 9969.10  329.02
  -5   3   1  143.35   27.54
   5   3  -1  154.58   33.67
  -5   3   1  143.10   36.51
   5   3  -1  132.18   20.71
   5  -3  -1  122.28   61.13
  -5  -3   1  111.62   14.79
   5  -3  -1  116.67   18.18
  -5   3   0  356.05   62.26
   5   3   0  433.96   84.83
   5   3   0  424.51   45.41
  -5   3   0  403.29   36.34
   5  -3   0  483.76   91.39
  -5  -3   0  372.58   65.08
   5  -3   0  371.52   33.02
  -5  -3   0  499.81   62.49
   5   3   1 1225.08   75.28
  -5   3  -1 1582.31  118.16
   5   3   1 1076.70  104.53
  -5   3  -1 1267.72   75.46
   5  -3   1 1322.15  196.09
   5  -3   1 1460.87  101.75
  -5  -3  -1 1718.96  157.30
  -5  -3  -1 1300.30   76.79
   5   3   2  -15.66   17.83
   5   3   2  111.59   42.55
  -5   3  -2   57.36   17.13
  -5   3  -2    9.29    6.56
  -5  -3  -2   30.98   23.58
   5  -3   2   15.12   35.74
   5  -3   2  125.20   74.05
  -5  -3  -2   -3.56    5.42
   5   3   3 1856.64  160.31
  -5   3  -3 2088.55  259.40
   5   3   3 1585.42  172.24
  -5   3  -3 2007.89  111.46
  -5  -3  -3 1785.36  156.71
   5  -3   3 1866.24  192.69
   5  -3   3 2068.63  393.92
  -5  -3  -3 1666.86  145.82
   5   3   4 3147.89  137.75
  -5   3  -4 3423.30  325.53
   5   3   4 2893.53  267.79
  -5   3  -4 2718.87  117.81
  -5  -3  -4 2783.01  131.87
   5  -3   4 3018.03  154.90
   5  -3   4 3308.94  405.79
  -5  -3  -4 3592.36  140.92
   5   3   5  111.78   76.49
   5   3   5   60.24   33.02
  -5   3  -5   41.16   15.10
   5  -3   5   39.57   38.00
  -5  -3  -5   47.58   22.61
   5  -3   5  108.87   59.11
  -5  -3  -5   13.17   10.93
   5   3   6 2459.57  409.92
   5  -3   6 1701.03  283.55
   5  -3   6 2587.06  188.01
  -5  -3  -6 2567.76  168.31
   5   3   7   83.45   69.08
  -5   3  -7   82.11   43.27
   5  -3   7   42.94   39.61
   5  -3   7  252.18  139.08
  -5  -3  -7   25.90   28.04
   5   3   8  113.41   63.09
  -5   3  -8   71.03   19.06
   5  -3   8   57.12   68.52
  -5  -3  -8   24.53   13.57
  -5   3  -9  222.27   50.47
  -5  -3  -9  161.29   39.09
  -5   3 -10   85.54   29.30
  -5  -3 -10   69.94   29.96
  -5  -3 -11   65.86   30.27
   5   5 -12  144.36   84.36
   5  -5 -12    7.98   37.17
   5   5 -11 1317.07  221.35
   5  -5 -11 1192.05  203.16
   5   5 -10   43.25   16.56
   5   5 -10  101.31   70.00
   5  -5 -10   80.64   34.81
   5   5  -9 1587.54  257.62
   5   5  -9 1952.37  343.11
   5  -5  -9  905.78  108.63
   5  -5  -9 1599.25  265.90
   5   5  -8 3014.20  289.55
   5   5  -8 2675.19  220.43
   5  -5  -8 2130.24  172.62
   5  -5  -8 3074.76  266.94
   5  -5  -8 2115.54  201.77
   5   5  -7 1420.65  171.47
   5   5  -7 1742.65  203.95
   5  -5  -7  958.08  175.46
  -5  -5   7 1413.53  168.67
   5  -5  -7 1484.57  181.40
   5  -5  -7 1903.45  110.63
   5   5  -6  385.47   72.86
  -5   5   6  446.03   60.11
   5   5  -6  477.39   75.39
   5  -5  -6  285.49   60.70
  -5  -5   6  349.44   66.61
   5  -5  -6  371.14   56.81
   5   5  -5 4609.49  230.31
   5   5  -5 4949.99  196.25
  -5   5   5 4701.30  182.59
   5   5  -5 5296.74  224.02
  -5  -5   5 4928.71  196.74
   5  -5  -5 5090.73  207.59
   5  -5  -5 4602.81  180.51
   5   5  -4 1553.76  334.47
   5   5  -4 1484.29  138.64
  -5   5   4 1426.70  117.94
   5   5  -4 1423.11  125.42
  -5   5   4 1404.03  123.98
   5  -5  -4 1319.90  115.36
   5  -5  -4 1184.01  111.57
  -5  -5   4 1783.65  140.69
   5   5  -3 7476.79  357.05
   5   5  -3 6847.90  228.18
  -5   5   3 6854.36  224.82
  -5   5   3 7077.35  242.04
   5   5  -3 6541.71  226.04
   5  -5  -3 5810.30  200.65
   5  -5  -3 8843.57  305.03
  -5  -5   3 6790.39  227.16
   5   5  -2 2076.78   78.37
  -5   5   2 2467.42   91.28
   5   5  -2 2102.91   80.79
  -5   5   2 2056.36   78.48
   5  -5  -2 2286.90  178.45
  -5  -5   2 2152.20   77.98
   5  -5  -2 2028.27   79.29
   5   5  -117973.01  581.54
  -5   5   116131.41  528.50
   5   5  -120196.04  651.43
  -5   5   121609.93  698.75
   5  -5  -119394.15  647.02
  -5  -5   121340.88  687.81
   5  -5  -119344.84  625.14
  -5   5   0 1343.74   82.36
  -5   5   0 1674.74  120.49
   5   5   0 1665.25  107.43
   5   5   0 1342.28   80.97
  -5  -5   0 1413.60   84.63
   5  -5   0 1120.39   72.24
   5  -5   0 1333.57  122.55
   5   5   1 1166.28   87.64
  -5   5  -1 1356.07  102.04
  -5   5  -1 1130.36   68.34
   5   5   1 1112.87   64.45
   5  -5   1 1569.08  143.83
  -5  -5  -1 1092.88   77.56
   5  -5   1 1071.48   71.92
   5   5   2  837.14   76.12
  -5   5  -2  870.53  181.48
  -5   5  -2  798.90   55.34
   5   5   2  477.69   93.16
   5  -5   2  857.43  158.11
   5  -5   2  751.90   82.68
  -5  -5  -2  803.61  108.89
  -5  -5  -2  652.85   46.94
   5   5   3 5967.88  259.36
  -5   5  -3 5504.89  269.73
  -5   5  -3 5398.43  187.90
   5  -5   3 4911.46  286.69
   5  -5   3 4566.45  201.18
  -5  -5  -3 5860.09  208.64
   5   5   4  804.16  197.37
  -5   5  -4  864.99  145.99
  -5   5  -4  581.30  127.36
   5  -5   4  991.15  182.62
   5  -5   4  904.93  124.00
  -5  -5  -4  825.23  158.85
  -5  -5  -4  712.83   65.76
   5   5   5 3356.17  277.28
   5  -5   5 3066.93  312.29
  -5  -5  -5 4150.75  246.04
   5  -5   5 4192.50  271.25
  -5  -5  -5 3191.74  183.30
   5   5   6  178.31   52.11
  -5   5  -6  102.93   61.10
   5  -5   6  128.07   63.11
   5  -5   6   -0.45   77.86
   5   5   7  302.64   87.93
  -5   5  -7  247.20   71.67
   5  -5   7  145.95   57.43
  -5  -5  -7  110.16   37.17
  -5   5  -8   68.97   30.15
   5  -5   8   81.81   76.55
  -5  -5  -8   28.86   12.29
   5   5   9 1238.82  208.95
  -5   5  -9 1012.31  171.86
   5  -5   9  843.80  299.96
  -5  -5  -9  680.88  179.74
  -5   5 -10 1012.10  199.54
   5   7 -11  347.51   93.84
   5   7 -11  730.50  135.03
   5  -7 -11  463.15  124.83
   5   7 -10   45.42   15.93
   5   7 -10   53.85   61.59
   5  -7 -10  199.96   47.61
   5   7  -9   -2.92   15.15
   5   7  -9  132.81   53.88
   5  -7  -9  142.85   46.43
   5   7  -8  184.60   36.93
   5   7  -8  373.82   79.38
   5  -7  -8  226.54   49.81
   5   7  -7   13.39   11.21
  -5  -7   7   -5.30   12.76
   5  -7  -7    0.83   26.24
   5   7  -6   95.56   35.49
   5  -7  -6   30.47   11.45
  -5  -7   6  166.86   44.17
   5  -7  -6   90.58   37.06
  -5   7   5 1043.06   95.25
   5   7  -5 1048.74  102.51
  -5   7   5  966.85  132.90
   5  -7  -5  904.77  108.58
   5  -7  -5 1110.04  134.62
  -5  -7   5  985.74   96.42
   5   7  -4  127.07   83.75
  -5   7   4  154.65   17.44
   5   7  -4  157.18   33.20
  -5   7   4  121.05   23.44
  -5  -7   4  171.09   29.24
   5  -7  -4  196.34   46.10
   5  -7  -4  191.27   30.63
   5   7  -3  863.44  163.93
   5   7  -3  755.92   73.34
  -5   7   3  758.37   80.24
  -5   7   3  743.40   72.50
  -5  -7   3  934.81  116.27
   5  -7  -3  726.46   70.36
   5  -7  -3  763.16  113.20
   5   7  -2 1499.50  117.44
  -5   7   2 1381.18   85.87
   5   7  -2 1465.88   88.28
  -5   7   2 1615.88  111.05
  -5  -7   2 1660.63  101.71
   5  -7  -2 1641.85  135.15
   5  -7  -2 1188.77  118.59
   5   7  -1 2447.77  173.37
  -5   7   1 3264.51  139.64
   5   7  -1 2282.95   99.29
   5   7  -1 2367.41   90.26
  -5   7   1 2528.91   92.29
   5  -7  -1 2497.35   93.96
   5  -7  -1 3021.89  163.94
  -5  -7   1 2408.55   87.47
   5   7   0  521.94   76.06
  -5   7   0  476.82   93.74
   5   7   0  642.43  101.26
   5   7   0  513.95   36.38
  -5   7   0  534.45   38.93
   5  -7   0  660.64  115.61
   5  -7   0  498.95   88.01
  -5  -7   0  521.19   72.87
   5   7   1 2555.04  114.04
  -5   7  -1 2707.56  137.43
   5   7   1 2687.75  112.92
   5   7   1 2593.67   86.62
  -5   7  -1 2654.08   94.61
   5  -7   1 2220.57   92.95
   5  -7   1 3014.37  406.66
  -5  -7  -1 2672.53   97.71
   5   7   2  264.40   57.86
  -5   7  -2  263.02   55.07
  -5   7  -2  408.11   78.17
   5  -7   2  421.27   95.86
   5  -7   2  335.54   77.99
  -5  -7  -2  215.29   43.77
   5   7   3  385.75   81.41
  -5   7  -3  252.73   59.31
  -5   7  -3  223.58   44.58
   5  -7   3  298.20   74.17
   5  -7   3  416.96   82.72
  -5  -7  -3  306.05   57.55
  -5   7  -4 2556.30  376.93
   5   7   4 3073.76  217.97
  -5   7  -4 2321.49  106.19
   5  -7   4 3123.49  273.02
   5  -7   4 3153.14  319.72
  -5  -7  -4 3678.32  159.40
   5   7   5   81.79   37.02
   5  -7   5  269.46  108.97
  -5  -7  -5   68.34   38.82
   5  -7   5  226.62   74.55
  -5  -7  -5  107.51   26.79
   5   7   6   68.48   54.77
  -5   7  -6   30.67   24.92
  -5   7  -6  154.05   66.24
   5  -7   6  224.88   90.09
  -5  -7  -6   -0.37    5.74
  -5  -7  -6   52.08   15.00
   5   7   7 1045.58  169.53
  -5   7  -7 1420.34  170.16
   5  -7   7 1164.20  280.24
  -5  -7  -7 1183.31  148.47
   5   7   8   -1.72   62.89
  -5   7  -8  262.57   52.89
   5  -7   8   93.07   53.50
   5   7   9   76.65   58.56
  -5   7  -9   66.81   32.57
   5  -7   9  100.50   62.13
  -5   7 -10   82.32   48.28
  -5  -7 -10   67.24   33.45
   5  -7  10  188.41  103.98
  -5   7 -11   64.32   44.18
   5   9 -11   51.50   34.62
   5  -9 -11   43.05   27.16
   5   9 -10  248.92   77.90
   5   9 -10  412.61   98.31
   5  -9 -10  244.35   71.29
   5   9  -9  168.60   72.05
   5  -9  -9  353.58   67.04
   5   9  -8 1880.66  235.35
   5  -9  -8 1940.40  238.67
   5   9  -7  218.85   41.25
   5  -9  -7  133.33   44.38
   5   9  -6   21.95   16.49
  -5  -9   6   -9.27   18.97
   5  -9  -6   48.99   28.40
   5   9  -5  320.80   72.35
  -5  -9   5  317.62   62.87
   5  -9  -5  434.93   82.01
  -5   9   4  601.43   59.22
   5   9  -4  639.32   77.08
   5   9  -4  618.29  126.91
  -5   9   4  548.73   54.23
   5  -9  -4  524.77   82.50
   5  -9  -4  666.86   88.98
   5   9  -3  462.34  154.07
  -5   9   3  416.22   49.48
   5   9  -3  302.67   37.13
  -5   9   3  288.41   42.99
  -5  -9   3  327.96   39.54
   5  -9  -3  377.32   54.87
   5  -9  -3  400.58   61.95
   5   9  -2 1192.71  201.72
  -5   9   2  894.13  102.68
   5   9  -2 1380.77  124.55
  -5   9   2 1281.69  117.07
  -5  -9   2 1454.32  144.79
   5  -9  -2 1332.40  124.61
   5  -9  -2 1159.38  186.84
   5   9  -1 3074.20  147.19
  -5   9   1 3113.48  243.29
   5   9  -1 2909.70  104.99
  -5   9   1 2865.07  103.81
  -5  -9   1 2842.65  101.87
   5  -9  -1 2629.41   98.60
   5  -9  -1 2832.38  161.67
   5   9   0 1007.97   76.47
  -5   9   0 1045.28  207.29
   5   9   0  767.00   52.19
   5   9   0  886.34   55.85
  -5   9   0  921.66   67.06
   5  -9   0  962.97   94.00
   5  -9   0 1089.89  237.02
  -5  -9   0  987.55   63.25
   5   9   1  289.59   40.39
  -5   9  -1  288.20   51.61
   5   9   1  374.26   81.98
   5   9   1  271.40   26.52
  -5   9  -1  318.79   66.75
   5  -9   1  339.22   61.97
   5  -9   1  184.12   63.75
  -5  -9  -1  284.00   50.50
   5   9   2  510.08   98.68
  -5   9  -2  367.34   67.95
  -5   9  -2  444.80   99.78
   5  -9   2  547.78  128.44
   5  -9   2  627.91  118.00
  -5  -9  -2  390.75   65.16
   5   9   3  836.37  130.49
  -5   9  -3  572.53  115.79
  -5   9  -3  941.61   86.95
   5  -9   3  654.87  123.07
   5  -9   3  882.61  176.37
  -5  -9  -3  898.25  122.22
  -5   9  -4  257.92   54.29
   5   9   4  415.71   92.30
  -5  -9  -4  374.56   67.16
   5  -9   4  787.84  167.22
   5  -9   4  378.67  141.99
   5   9   5  120.96   73.06
  -5   9  -5   64.74   25.58
  -5   9  -5   30.65   15.24
  -5  -9  -5   38.76   16.67
   5  -9   5  164.54   85.63
   5   9   6 1651.76  250.49
  -5   9  -6 1888.26  153.45
   5  -9   6 1631.73  178.79
  -5  -9  -6 1395.52  203.25
   5   9   7  286.71  117.49
  -5   9  -7  455.30   84.51
   5  -9   7  486.79  136.56
  -5  -9  -7   61.67   19.72
  -5  -9  -7  281.20   46.87
   5   9   8  130.93   47.34
  -5   9  -8  120.09   41.63
   5  -9   8  179.51   96.56
  -5  -9  -8   82.74   25.06
   5   9   9  215.48  105.70
  -5   9  -9  270.93   72.89
   5  -9   9  128.77   76.60
  -5   9 -10   58.28   38.47
   5  -9  10   -8.00   69.44
   5  11 -11 2607.57  345.94
   5 -11 -11 1771.76  291.07
   5 -11 -10  195.70   67.79
   5  11  -9   72.62   26.07
   5 -11  -9   74.40   29.68
   5  11  -8  185.38   57.99
   5 -11  -8  173.24   57.50
   5  11  -7  349.38   51.51
   5 -11  -7  376.69   78.24
   5  11  -6 4555.21  262.03
   5 -11  -6 4554.12  263.67
   5  11  -5 7227.82  414.36
   5 -11  -5 5721.50  327.84
  -5  11   4  677.30   67.72
   5  11  -4  761.79   83.33
  -5  11   4  546.39   69.62
  -5  11   4  775.62   71.52
   5  11  -4  586.48   92.16
   5 -11  -4  853.83  139.65
  -5 -11   4  635.85   69.40
  -5  11   3 8667.26  331.78
   5  11  -3 9204.76  354.01
  -5  11   3 9327.36  366.79
  -5  11   3 8598.15  325.65
   5  11  -3 9402.93  401.13
   5 -11  -3 9285.11  358.91
  -5 -11   3 9957.37  385.71
   5  11  -2  157.23   59.98
  -5  11   2  307.82   44.89
   5  11  -2  246.65   52.66
  -5  11   2  180.62   25.58
  -5 -11   2  228.99   33.21
   5 -11  -2  245.64   47.79
   5 -11  -2  163.51   36.49
   5  11  -1  216.94   46.18
  -5  11   1  453.36   91.80
   5  11  -1  450.52   85.58
  -5  11   1  258.48   29.92
  -5 -11   1  313.71   39.30
   5 -11  -1  468.94   72.39
   5 -11  -1  287.95   49.49
   5  11   0   26.87   25.79
  -5  11   0   13.18   25.22
   5  11   0   21.88   14.70
  -5  11   0   -3.86   14.60
  -5 -11   0   16.47    9.73
   5 -11   0   55.59   28.40
   5 -11   0  121.85   45.28
  -5  11  -113434.81  444.65
  -5  11  -111978.95  423.91
   5  11   115449.91  511.84
   5  11   113897.55  448.94
  -5 -11  -115575.14  508.66
   5 -11   112951.10  479.87
   5  11   2 2366.12  121.09
  -5  11  -2 1812.20  116.25
  -5  11  -2 2490.64  137.04
   5 -11   2 1812.60  180.82
   5 -11   2 2040.11  238.71
  -5 -11  -2 2302.73  161.55
  -5  11  -3 3215.56  173.30
   5  11   3 3412.65  152.95
  -5  11  -3 3818.97  162.33
  -5  11  -3 3548.91  153.24
  -5 -11  -3 3888.14  157.68
   5 -11   3 3198.89  178.66
   5  11   4   78.85   25.78
  -5  11  -4   65.82   24.30
  -5  11  -4   33.62   19.36
  -5 -11  -4   16.33    8.39
   5 -11   4  111.95   47.21
   5  11   5 1450.42  218.48
  -5  11  -5 1932.71  123.92
  -5 -11  -5 1434.22  177.67
   5 -11   5 1814.41  168.35
   5  11   6   87.72   35.94
  -5  11  -6   70.99   46.17
   5 -11   6   14.43   64.33
   5  11   7 4184.99  553.77
  -5  11  -7 2805.12  341.97
   5 -11   7 2586.24  345.94
   5  11   8 1589.07  358.82
  -5  11  -8 1738.03  286.60
   5 -11   8  881.72  404.12
   5  11   9  700.35  161.78
  -5  11  -9 1218.88  198.14
   5 -11   9  761.89  352.24
   5  11  10   74.47   83.07
  -5  11 -10   60.10   50.35
   5 -11  10  116.11  100.04
   5 -13 -11  179.60   52.60
   5  13 -10  128.14   43.10
   5 -13 -10   78.78   19.97
   5 -13  -9  149.96   33.65
   5  13  -8  366.65   98.52
   5 -13  -8  401.45   64.65
   5  13  -7  433.82   78.68
   5 -13  -7  392.46   76.21
   5  13  -6 1329.11  188.71
   5 -13  -6 1374.88  215.12
   5  13  -5 4029.53  214.81
   5 -13  -5 4032.75  224.90
  -5  13   4 1779.52  100.87
   5  13  -4 1772.69  116.34
  -5  13   4 1894.79  108.42
   5 -13  -4 2219.90  157.38
  -5  13   3  229.36   34.72
   5  13  -3  421.17   77.25
  -5  13   3  313.61   37.46
  -5  13   3  377.61   60.56
   5  13  -3  361.34  110.64
   5 -13  -3  450.83   65.47
  -5 -13   3  334.53   64.40
  -5  13   2  203.64   34.84
   5  13  -2  293.33   61.83
  -5  13   2  210.77   26.73
   5  13  -2  242.15   61.17
  -5  13   2  242.68   41.66
  -5 -13   2  191.13   26.39
  -5 -13   2  122.15   60.80
   5 -13  -2  287.53   55.94
  -5  13   1   35.52   20.65
   5  13  -1   80.61   22.29
  -5  13   1   61.34   15.40
   5  13  -1   72.05   19.76
  -5  13   1   64.66   28.40
  -5 -13   1   54.44   16.46
  -5 -13   1  155.77   42.49
   5 -13  -1   27.18   14.96
  -5  13   0  479.41   64.78
   5  13   0  701.01  110.84
  -5  13   0  626.68   96.15
  -5  13   0  507.84   47.72
   5  13   0  576.61   84.07
   5 -13   0  539.05   84.42
  -5 -13   0  624.86   67.76
  -5  13  -1  994.69  119.50
   5  13   1  592.54   57.94
  -5  13  -1  761.06   98.66
  -5  13  -1  775.01   85.55
   5  13   1  688.42   66.80
   5 -13   1  671.77  109.13
  -5 -13  -1  761.84   89.56
  -5  13  -2 2806.42  176.66
   5  13   2 2538.96  120.82
   5  13   2 2034.78   77.59
  -5  13  -2 2085.01   93.92
  -5  13  -2 2837.00  127.50
   5 -13   2 2436.45  173.38
  -5 -13  -2 2379.07  116.24
   5  13   3  456.42   87.14
  -5  13  -3  442.32   82.33
  -5  13  -3  343.69   80.02
  -5 -13  -3  441.41   75.01
   5 -13   3  489.81  104.95
   5  13   4   63.11   34.78
  -5  13  -4   69.18   30.61
  -5 -13  -4   12.25   14.27
   5 -13   4   84.94   48.63
   5  13   5  462.24   97.70
  -5  13  -5  466.93  108.80
  -5 -13  -5  306.44   65.92
   5 -13   5  247.55  117.75
   5  13   6  222.66   64.63
  -5  13  -6  410.23   74.01
   5 -13   6  664.30  230.29
   5  13   7 1443.78  166.82
  -5  13  -7 1485.89  154.42
   5 -13   7 1237.30  186.00
   5  13   8  313.47   61.24
  -5  13  -8  331.51   59.85
   5 -13   8  219.53   89.17
  -5  13  -9   30.76   37.67
   5 -13   9  190.17   86.09
  -5  13 -10   58.57   37.76
   5 -13  10  150.48  116.21
   5  15 -11   15.11   25.95
   5 -15 -11   -3.27   25.88
   5  15 -10  299.14  114.73
   5 -15 -10  397.04  109.09
   5  15  -9  139.24   46.72
   5 -15  -9   44.90   18.59
   5  15  -8   11.21   14.69
   5 -15  -8   -7.01   21.84
   5  15  -7   22.75   11.38
   5 -15  -7   48.83   28.23
   5  15  -6  179.35   43.05
   5 -15  -6   66.37   27.24
   5  15  -5 3542.29  207.09
   5 -15  -5 3814.63  222.91
  -5  15   4 1532.28  181.21
   5  15  -4 1597.64  184.75
  -5  15   4 1536.30  173.33
  -5 -15   4 1538.63  211.45
   5 -15  -4 1733.00  238.33
  -5  15   3   65.65   25.08
   5  15  -3   61.63   18.94
  -5  15   3   36.37   17.47
   5  15  -3   98.51   68.33
  -5 -15   3  164.66   71.32
   5 -15  -3   38.75   12.11
  -5  15   2   49.46   33.56
   5  15  -2   48.51   23.04
  -5  15   2   76.50   16.43
  -5  15   2   13.24    8.28
  -5 -15   2   98.38   77.26
   5 -15  -2   62.20   33.85
  -5 -15   2   24.38   18.99
  -5  15   1   63.88   41.87
   5  15  -1   22.51   10.19
  -5  15   1   37.80   15.04
   5  15  -1   53.46   49.83
  -5  15   1   21.99   14.48
  -5 -15   1   20.27   12.81
  -5 -15   1   57.66   28.47
   5 -15  -1   89.07   29.32
  -5  15   0  859.18  124.46
   5  15   0  727.86  102.94
  -5  15   0  602.21   79.19
   5  15   0  716.63  131.56
  -5  15   0  617.69  111.31
  -5 -15   0  584.47   88.29
  -5 -15   0  748.65  158.71
   5 -15   0  677.38  140.01
  -5  15  -1   79.97   57.81
   5  15   1   41.69   14.59
   5  15   1   61.20   37.24
  -5  15  -1   16.38   19.56
  -5  15  -1  100.45   44.65
  -5 -15  -1  101.96   41.70
  -5 -15  -1   30.45   16.68
   5 -15   1  152.02   70.95
  -5  15  -2  428.39  101.00
   5  15   2  610.60  111.64
  -5  15  -2  721.44  146.50
   5  15   2  411.23   54.40
  -5 -15  -2  512.23   86.90
   5 -15   2  612.25  123.42
   5  15   3   63.61   25.53
  -5  15  -3  102.66   32.13
  -5 -15  -3  156.45   24.23
   5 -15   3   43.80   66.34
   5  15   4   46.66   31.96
  -5  15  -4   90.22   27.64
  -5 -15  -4   43.38   20.81
   5 -15   4  158.28   74.38
   5  15   5   12.28   45.29
  -5  15  -5  110.38   39.71
   5 -15   5  100.23   87.34
   5  15   6  286.06  100.40
  -5  15  -6  408.95   87.53
   5 -15   6  320.62  137.01
   5  15   7  386.15  109.06
  -5  15  -7  620.59   90.86
   5 -15   7  203.78  108.83
   5  15   8  173.72   52.56
  -5  15  -8  438.24  137.52
   5 -15   8  793.86  215.42
  -5  15  -9   48.67   52.58
   5 -15   9   93.88   90.19
  -5  15 -10   80.72   50.36
   5 -15  10   38.23   64.27
   5  17 -10   30.37   11.51
   5 -17 -10  -13.51   24.19
   5  17  -9 1747.37  272.91
   5 -17  -9 1655.72  308.58
   5 -17  -8  129.55   26.79
   5  17  -7 2543.50  247.62
   5 -17  -7 2479.89  296.03
   5  17  -6   25.90   15.61
   5 -17  -6  -14.08   22.23
   5  17  -5 1869.81  166.37
  -5 -17   5 1828.12  212.42
   5 -17  -5 2194.60  234.10
  -5  17   4 1843.90  305.50
   5  17  -4 2519.49  170.87
  -5  17   4 2734.52  141.36
  -5 -17   4 2095.33  428.92
   5 -17  -4 2504.99  139.89
  -5  17   3 2484.32  162.61
   5  17  -3 2630.31  145.27
  -5  17   3 2348.72  124.46
   5  17  -3 2808.94  189.29
  -5 -17   3 2067.14  407.31
   5 -17  -3 4105.42  390.64
  -5  17   2  712.51  126.56
   5  17  -2  752.79  103.62
  -5  17   2  978.01  138.93
   5  17  -2  848.30  138.73
  -5 -17   2  716.47  172.94
   5 -17  -2 1028.76  180.13
  -5  17   1 6228.98  448.18
   5  17  -1 5093.94  292.90
  -5  17   1 4865.92  278.31
   5  17  -1 5400.77  330.66
  -5 -17   1 4728.73  371.38
   5 -17  -1 4537.95  270.95
  -5  17   0    7.14   53.92
   5  17   0   17.83   16.14
  -5  17   0   -2.25   19.59
   5  17   0   71.68   29.23
  -5 -17   0   81.92   65.90
   5 -17   0   30.33   32.95
  -5  17  -1   69.29   62.15
   5  17   1   20.08   13.99
  -5  17  -1   23.27   16.20
   5  17   1  135.61   45.18
  -5 -17  -1   26.40   11.45
  -5 -17  -1   14.50   32.48
   5 -17   1  285.98  107.54
   5  17   2  334.99   56.60
   5  17   2  228.70   37.17
  -5  17  -2  453.16   94.48
  -5 -17  -2  310.07   82.70
   5 -17   2  371.22  101.10
  -5 -17  -2  356.32   58.65
   5  17   3 7818.18  450.72
  -5  17  -3 6986.19  367.56
   5 -17   3 6485.34  380.53
   5  17   4  362.94   75.79
  -5  17  -4  604.75  118.97
   5 -17   4  230.00  110.80
   5  17   5 1014.40  159.54
  -5  17  -5 1093.20  135.26
   5 -17   5 1169.92  195.02
   5  17   6 1351.88  164.21
  -5  17  -6  977.10  246.97
   5 -17   6 1095.80  248.96
   5  17   7  148.01   69.81
  -5  17  -7   88.23   32.46
   5 -17   7  107.09   76.60
   5  17   8  291.43  129.76
  -5  17  -8  176.02   60.29
   5 -17   8  204.60  108.25
  -5  17  -9  198.30   50.56
   5 -17   9  329.28  145.78
  -5  17 -10  336.89   87.12
   5 -17  10  236.44   92.83
   5  19 -10   29.48   23.57
   5 -19 -10   44.40   22.83
   5 -19  -9   87.45   28.28
   5  19  -8  271.49   59.55
   5 -19  -8  247.93   65.85
   5  19  -7  300.20   70.21
   5 -19  -7  226.01   64.57
   5  19  -6  535.19  117.08
  -5 -19   6 1063.99  195.61
   5 -19  -6  445.37   93.05
   5  19  -5  864.94  130.27
  -5 -19   5  992.88  247.28
   5 -19  -5  867.76  153.28
  -5  19   4  305.63   83.09
   5  19  -4  552.02  108.61
  -5  19   4  474.03   65.21
  -5 -19   4  146.52   98.67
   5 -19  -4  688.76  137.02
  -5  19   3   24.54   22.96
   5  19  -3   20.70   23.05
  -5  19   3   -2.19   11.50
  -5 -19   3  109.16   77.31
   5 -19  -3   20.86   35.89
   5  19  -2 2123.62  121.88
  -5  19   2 2240.19  121.49
   5  19  -2 1994.51  215.69
  -5 -19   2 1975.10  273.27
   5 -19  -2 2462.09  147.16
   5  19  -1   17.99   20.19
  -5  19   1   62.32   27.86
  -5 -19   1   67.99   58.08
   5 -19  -1   30.68   28.75
  -5  19   0  305.83   84.83
   5  19   0  355.51   62.31
  -5  19   0  379.35   56.99
   5  19   0  419.22   77.74
  -5 -19   0   87.62   70.04
   5 -19   0  220.75   78.71
   5  19   1  650.91  129.12
  -5  19  -1  535.23   71.43
   5  19   1  317.32   55.84
   5 -19   1  636.90  129.12
  -5 -19  -1  543.99  120.29
   5  19   2   58.03   25.16
  -5  19  -2   54.95   27.36
   5  19   2   16.45   10.13
   5 -19   2  135.33   57.10
  -5 -19  -2   11.47   22.23
   5  19   3 1160.45  207.95
  -5  19  -3  956.79  140.82
   5 -19   3  991.63  319.45
   5  19   4 1341.07  249.26
  -5  19  -4 1787.63  145.07
   5 -19   4 1732.09  526.17
   5  19   5   97.98   41.31
  -5  19  -5  253.78   66.50
   5 -19   5  283.37  147.57
   5  19   6  301.31  147.78
  -5  19  -6  496.00  110.92
   5 -19   6  311.32  146.48
   5  19   7   58.09   32.74
  -5  19  -7   56.34   23.28
   5 -19   7  267.02  136.71
  -5  19  -8  173.48   48.16
   5 -19   8  661.15  175.63
  -5  19  -9  146.15   43.62
   5  21 -10  224.94   49.51
   5 -21 -10  157.23   43.55
   5  21  -9   88.26   31.37
   5 -21  -9   63.74   27.85
   5  21  -8  899.48  210.81
   5  21  -7 1075.81  136.66
  -5 -21   7 1694.40  261.00
   5 -21  -7 1072.94  185.18
   5  21  -6 2274.37  224.49
  -5 -21   6 2765.63  319.01
   5 -21  -6 2112.26  219.55
   5  21  -5  438.32  122.19
  -5 -21   5  376.55  106.60
   5 -21  -5  794.84  175.98
  -5  21   4  435.30  111.01
  -5  21   4  804.89   92.48
   5  21  -4  852.48  132.42
  -5 -21   4  680.43  239.76
   5 -21  -4  937.52  175.00
  -5  21   3  819.34  188.05
   5  21  -3 1202.02  187.50
  -5  21   3 1604.03  125.33
  -5 -21   3 1356.06  397.65
   5 -21  -3 1753.00  287.58
  -5  21   2 4994.27  542.56
   5  21  -2 5391.62  308.79
  -5  21   2 5054.87  287.83
  -5 -21   2 5476.69  427.17
   5 -21  -2 4474.68  276.07
  -5  21   1 1201.77  177.19
   5  21  -1 1259.63  153.52
  -5  21   1 1232.93  149.97
   5  21  -1  953.94  131.38
  -5 -21   1 1012.48  238.12
   5 -21  -1  881.22  186.84
   5  21   0 2419.08  159.05
  -5  21   0 2375.33  143.89
   5  21   0 2333.44  257.22
   5 -21   0 3051.04  601.00
  -5 -21   0 2473.68  436.54
   5  21   1   61.96   21.07
  -5  21  -1   50.55   36.36
   5  21   1   44.45   19.36
   5 -21   1   56.81   48.40
  -5 -21  -1   -5.04   44.39
   5  21   2   11.87    9.44
  -5  21  -2  -12.38   27.66
   5  21   2    8.20    6.73
   5 -21   2  239.81   85.06
  -5 -21  -2   79.81   41.62
   5  21   3  472.63  105.52
  -5  21  -3  324.04   60.58
   5  21   3  198.09   35.74
   5 -21   3  307.87  108.46
  -5 -21  -3  167.63   54.53
   5  21   4 1210.88  206.77
  -5  21  -4 1406.69  181.73
   5 -21   4 1628.33  381.00
   5  21   5  939.69  240.28
  -5  21  -5 1439.63  222.12
   5 -21   5 1610.07  233.92
   5  21   6 1529.36  243.99
  -5  21  -6 1483.57  175.67
   5 -21   6 1835.74  274.75
   5  21   7  137.03   58.62
  -5  21  -7   57.70   40.55
   5 -21   7  276.70  119.89
   5  21   8  117.07   53.85
  -5  21  -8  198.18   94.06
   5 -21   8  182.22   98.79
  -5  21  -9  249.14   77.19
   5  23  -9   95.54   31.19
   5 -23  -9    5.66   19.90
   5  23  -8   49.21   25.41
   5 -23  -8   48.92   24.40
   5  23  -7   53.67   42.92
  -5 -23   7  262.11  156.36
   5 -23  -7   69.67   25.30
   5  23  -6   18.98   26.17
  -5 -23   6  282.96  150.28
   5 -23  -6   39.77   33.89
   5  23  -5 1252.27  129.25
  -5 -23   5  940.19  334.22
   5 -23  -5 1494.85  248.12
  -5  23   4   75.64   29.18
  -5  23   4  124.62   28.39
   5  23  -4  139.80   42.64
  -5 -23   4  114.14   92.46
   5 -23  -4  134.59   39.53
  -5  23   3  285.61   71.05
   5  23  -3  462.63   82.38
  -5  23   3  401.97   81.10
  -5 -23   3  240.31  137.58
   5 -23  -3  546.35  103.67
  -5  23   2  679.63  138.88
   5  23  -2  742.23  134.28
  -5  23   2  872.20  141.51
  -5 -23   2  622.09  188.47
   5 -23  -2  588.49  169.44
  -5  23   1   -4.77   39.59
   5  23  -1   38.72   28.21
  -5  23   1   68.21   31.60
   5  23  -1  108.31   59.37
  -5 -23   1   71.75   51.56
   5 -23  -1   97.14   38.76
   5  23   0   11.16   25.30
  -5  23   0   55.56   18.95
   5  23   0   11.18   32.15
   5 -23   0  258.70   89.98
  -5 -23   0  159.89   52.61
   5  23   1 1725.26  173.65
  -5  23  -1 1625.55  131.68
  -5 -23  -1 1818.74  273.79
   5 -23   1 1572.47  318.33
   5  23   2 1991.09  238.06
  -5  23  -2 2485.42  212.25
   5  23   2 2190.63  189.71
   5 -23   2 2013.19  239.27
  -5 -23  -2 2005.44  348.02
   5  23   3   61.62   21.58
  -5  23  -3   34.09   31.61
   5  23   3   26.54   11.96
   5 -23   3   23.22   97.44
  -5 -23  -3   41.54   24.98
   5  23   4  437.95  112.23
  -5  23  -4  490.76  126.17
   5 -23   4  526.13  171.06
   5  23   5   27.84   17.53
  -5  23  -5   79.83   37.75
   5 -23   5  405.75  165.17
  -5  23  -6  177.38   43.62
   5 -23   6  115.03  116.41
  -5  23  -7  494.02   95.17
   5 -23   7  301.35  137.38
  -5  23  -8   96.02   64.22
   5 -23   8  381.14  187.75
   5  25  -9   13.26   21.50
   5 -25  -9  163.56   56.77
   5  25  -8   38.22   22.53
   5 -25  -8  106.67   56.71
   5  25  -7   74.80   27.99
  -5 -25   7  275.97  187.89
   5 -25  -7  166.34   49.90
   5  25  -6   90.13   25.86
  -5 -25   6   25.87  118.80
   5 -25  -6  127.86   44.55
   5  25  -5  197.32   62.07
  -5 -25   5  223.74   77.20
   5 -25  -5  136.47   41.88
  -5  25   4  562.01  115.28
   5  25  -4  512.79  147.88
  -5 -25   4  356.22  195.73
   5 -25  -4  417.57  116.83
   5  25  -3  142.86   45.79
  -5  25   3  147.75   33.01
  -5 -25   3  116.33   97.79
   5 -25  -3  128.41   36.94
  -5  25   2   31.43   54.23
   5  25  -2   52.74   26.38
  -5  25   2   67.39   31.62
  -5 -25   2  140.46   56.70
   5 -25  -2   93.91   43.21
   5  25  -1   88.07   24.84
  -5  25   1  161.97   37.78
  -5 -25   1  165.27   99.42
   5 -25  -1  -28.23   83.17
   5  25   0  297.58   50.75
  -5  25   0  315.56   51.54
  -5 -25   0  153.09   96.91
   5 -25   0  233.87  103.04
   5  25   1  271.21   71.18
  -5  25  -1  215.10   47.09
  -5 -25  -1  350.67  104.54
   5 -25   1  151.04  114.51
   5  25   2   95.12   26.47
  -5  25  -2  303.03   71.65
   5  25   2   94.25   23.86
   5 -25   2  382.93  161.52
  -5 -25  -2   93.49   54.25
   5  25   3  203.19   57.88
  -5  25  -3  109.00   30.81
  -5 -25  -3  114.77   48.75
   5 -25   3  245.16  101.72
   5  25   4   34.32   18.79
  -5  25  -4   -5.08   35.25
   5 -25   4   94.89  116.10
  -5  25  -5  179.89   48.63
   5 -25   5  246.24  121.62
   5  25   6   71.61   24.30
  -5  25  -6   90.90   42.58
   5 -25   6  320.46  150.02
  -5  25  -7  268.73   81.55
   5 -25   7  384.87  204.25
  -5  25  -8   59.77   32.60
   5 -25   8  235.71  122.21
   5  27  -8 1497.38  194.19
  -5 -27   8 1216.36  275.60
   5 -27  -8 1033.24  274.30
   5  27  -7  172.86   58.83
  -5 -27   7  314.13  124.86
   5 -27  -7  149.88   35.89
   5  27  -6 1054.14  161.85
  -5 -27   6  853.23  276.60
   5 -27  -6  981.54  240.48
   5  27  -5  869.59  110.14
  -5 -27   5  744.72  259.56
   5 -27  -5  741.35  216.89
  -5  27   4 1070.42  142.82
   5  27  -4 1270.35  119.33
  -5 -27   4  646.69  192.85
   5 -27  -4  970.93  240.87
  -5  27   3  224.07   76.35
   5  27  -3  391.66   91.74
  -5 -27   3  433.06  140.99
   5 -27  -3  188.28   72.87
   5  27  -2 1709.17  173.95
  -5  27   2 1738.52  197.12
  -5 -27   2 1544.41  372.42
   5 -27  -2 1558.23  364.56
   5  27  -1  600.05  144.34
  -5  27   1  439.05   86.76
  -5 -27   1  660.09  238.05
   5 -27  -1  506.23  137.93
   5  27   0  518.06  137.16
  -5  27   0  527.24  117.31
   5 -27   0  517.30  177.99
   5  27   1  463.95  131.44
  -5  27  -1  405.35   46.03
   5  27   1  275.75   74.45
   5 -27   1  217.89  101.74
  -5 -27  -1  426.92  102.13
   5  27   2 1481.68  277.77
  -5  27  -2 1467.22  243.00
  -5 -27  -2  989.17  352.72
   5 -27   2 1480.42  330.95
   5  27   3  259.46   74.52
  -5  27  -3  285.62   85.47
  -5 -27  -3  134.11   58.63
   5 -27   3  207.81   76.19
   5  27   4  492.10   71.89
  -5  27  -4  475.70  124.03
   5 -27   4  538.96  194.75
   5  27   5   65.33   36.62
  -5  27  -5   84.72   38.56
   5 -27   5  750.15  208.04
   5  27   6   91.03   46.05
   5 -27   6  511.37  186.30
  -5  27  -7  659.90  102.87
   5 -27   7  550.98  181.03
   5  29  -7  106.00   44.21
  -5 -29   7  149.96  158.82
   5 -29  -7   50.55   27.98
   5  29  -6  275.52   87.36
  -5 -29   6  199.19  118.14
   5 -29  -6  216.94   55.24
   5  29  -5  252.57   70.84
   5 -29  -5  114.93   22.87
   5  29  -4  939.87  188.21
  -5 -29   4  790.64  271.63
   5 -29  -4  486.97  146.76
  -5  29   3   71.12   26.65
   5  29  -3   34.24   27.91
  -5 -29   3  187.51  133.99
   5 -29  -3  107.32   42.41
   5  29  -2   50.58   21.36
  -5  29   2    5.97   21.50
  -5 -29   2  195.88   84.50
   5 -29  -2    4.50   78.12
   5  29  -1  306.52   95.55
  -5  29   1  450.63   97.21
  -5 -29   1  250.06   90.51
   5 -29  -1  382.19  136.42
   5  29   0   36.01   22.64
  -5  29   0   12.62   27.88
  -5 -29   0   73.36   71.17
   5 -29   0  145.63   65.58
   5  29   1  116.03   35.53
  -5  29  -1  172.94   43.47
   5 -29   1  119.44   81.99
   5  29   2  169.47   34.47
  -5  29  -2   92.83   27.65
  -5 -29  -2  439.76   90.53
   5 -29   2  148.17  118.07
   5  29   3   18.87   20.08
  -5  29  -3  120.63   37.34
   5 -29   3   93.87  142.68
   5  29   4   25.11   31.93
  -5  29  -4   -5.56   33.82
   5 -29   4    5.73  131.03
   5  29   5  -14.05   27.82
  -5  29  -5  -18.21   41.53
   5 -29   5  193.26  137.40
   5  29   6  105.96   47.06
  -5  29  -6  353.31   86.08
   5 -29   6  636.01  190.86
  -5  29  -7  486.83   94.21
   5 -29   7  352.19  131.17
   5  31  -7   93.40   46.33
  -5 -31   7  372.23  159.65
   5  31  -6   55.71   28.13
  -5 -31   6   88.83   57.11
   5 -31  -6   64.35   32.60
   5  31  -5   46.88   17.03
  -5 -31   5    4.88   65.93
   5 -31  -5  102.91   43.91
   5  31  -4  227.92   51.25
  -5 -31   4  117.59  126.38
   5 -31  -4  124.94   38.00
   5  31  -3   23.79   26.12
  -5 -31   3  106.75   88.99
   5  31  -2   51.20   39.46
  -5  31   2   86.59   33.99
  -5 -31   2   72.72   56.65
   5 -31  -2  179.26   83.67
   5  31  -1  884.69  146.68
  -5  31   1 1073.54  140.87
  -5 -31   1  516.27  213.04
   5 -31  -1  821.40  225.79
   5  31   0   30.43   24.56
  -5  31   0  100.90   46.28
  -5 -31   0  139.03   84.60
   5 -31   0  207.99  138.57
   5  31   1   25.72   20.99
  -5  31  -1   35.94   44.12
  -5 -31  -1   56.25   52.18
   5 -31   1  -61.76   94.86
   5  31   2  656.64  119.38
  -5  31  -2  683.52   52.72
  -5 -31  -2  377.98  141.48
   5 -31   2  458.40  270.33
   5  31   3   54.28   22.15
  -5  31  -3   80.70   29.91
   5 -31   3  138.33  121.73
   5  31   4  211.88   76.75
  -5  31  -4  316.51   85.12
   5 -31   4  405.64  171.97
   5  31   5  127.12   59.87
  -5  31  -5   -6.49   42.91
   5 -31   5   61.69  119.38
  -5  31  -6  114.70   49.66
   5 -31   6  157.84   97.80
   5  33  -6 1150.11  201.01
  -5 -33   6  433.85  228.54
   5 -33  -6  518.74  102.42
   5  33  -5   72.55   25.79
  -5 -33   5  242.15  109.83
   5 -33  -5   46.10   26.57
   5  33  -4 1251.16  224.35
  -5 -33   4  787.70  236.90
   5 -33  -4 1038.61  301.71
   5  33  -3   52.65   19.90
  -5 -33   3   66.22   45.24
   5 -33  -3   76.02   90.63
   5  33  -2  194.91   49.21
  -5 -33   2  368.31  164.91
   5 -33  -2  208.68   87.91
   5  33  -1 1385.33  252.71
  -5  33   1 1730.13  271.59
  -5 -33   1 1260.05  290.70
   5 -33  -1 1030.25  269.89
   5  33   0 2377.52  369.83
  -5  33   0 2367.66  369.95
  -5 -33   0 1501.84  456.44
   5 -33   0 2163.45  374.88
   5  33   1   35.85   15.58
  -5  33  -1  126.34   52.75
   5 -33   1   82.76  109.13
   5  33   2  559.98  194.95
  -5  33  -2  992.45  194.79
   5 -33   2  488.96  183.73
   5  33   3  127.21   57.49
  -5  33  -3  223.41   59.98
   5 -33   3  455.35  210.56
   5  33   4  241.98  112.14
  -5  33  -4  233.97   64.61
   5 -33   4  341.11  155.44
  -5  33  -5 1504.65  235.30
   5 -33   5  542.65  159.31
   5  35  -4  -15.21   27.77
  -5 -35   4   91.61   83.86
   5 -35  -4  456.17  179.65
   5  35  -3  146.96   80.91
  -5 -35   3   73.74  105.12
   5 -35  -3  292.06  156.88
   5  35  -2  467.75  188.58
  -5  35   2  329.41  115.78
  -5 -35   2  336.84  107.63
   5 -35  -2  617.43  146.86
   5  35  -1  112.23   44.10
  -5  35   1  112.01   36.66
  -5 -35   1   79.36   64.94
   5 -35  -1  183.95   93.85
   5  35   0   79.96   31.35
  -5  35   0  109.48   47.08
  -5 -35   0   83.14   54.04
   5 -35   0   54.34   48.07
   5  35   1  326.68   99.49
  -5  35  -1  257.53   75.61
   5 -35   1  134.22   91.07
  -5  35  -2   95.82   39.84
   5 -35   2  198.86   80.05
   5  35   3   22.48   18.98
   5 -35   3  -36.41  142.76
   5  35   4   58.07   38.66
  -5  35  -4  221.66   59.85
   5 -35   4   49.63  151.80
   5  37  -2  224.95   77.40
  -5 -37   2  171.92  105.95
   5  37  -1   20.18   25.87
  -5  37   1   46.66   38.48
  -5 -37   1   42.91   98.32
   5 -37  -1   71.57   97.78
   5  37   0  236.66   81.84
   5 -37   0  276.36  103.86
   5  37   1  144.00   51.32
  -5  37  -1   93.15   39.38
   5 -37   1  264.24  158.84
   5  37   2  192.60   66.48
   5 -37   2  227.04  142.38
   6   0 -11   80.15   34.77
   6   0 -10 9987.22  161.00
   6   0  -9   20.32   11.31
   6   0  -9    1.55   25.36
  -6   0   8 1619.64  200.71
   6   0  -8 1848.79  233.84
   6   0  -7   15.09    8.55
  -6   0   7   11.04   11.50
   6   0  -7   37.38   28.27
   6   0  -6   33.06   15.41
  -6   0   6   30.35   13.57
   6   0  -6   67.95   44.46
   6   0  -5   11.21   10.24
  -6   0   5   39.84   20.03
   6   0  -5   23.52   11.40
   6   0  -420856.23 1878.42
  -6   0   424011.01 2160.78
   6   0  -423704.68 2136.11
   6   0  -3   34.71   23.03
  -6   0   3   14.51   11.60
   6   0  -3   21.00   24.58
  -6   0   3   25.79   19.41
   6   0  -2 2467.13  147.16
  -6   0   2 2341.61   85.19
   6   0  -2 2441.23   91.89
  -6   0   2 2381.63   91.08
   6   0  -1    9.35   18.67
  -6   0   1    2.82   10.23
  -6   0   1   39.23   25.01
   6   0  -1   36.66   18.40
   6   0   0 6015.28  245.08
  -6   0   0 4613.04  169.13
   6   0   0 4303.65  151.09
  -6   0   0 4450.84  151.42
   6   0   1  -52.77   50.17
  -6   0  -1   17.74   15.69
   6   0   1   40.17   15.57
  -6   0  -1    4.46   10.97
   6   0   2 9734.70  358.93
  -6   0  -2 8560.46  294.61
  -6   0  -2 9790.63  319.93
   6   0   3  219.62   64.98
  -6   0  -3   39.78   24.83
   6   0   3   16.29   26.04
  -6   0  -3    1.29    8.64
   6   0   4 2123.41  159.67
   6   0   4 2544.48  132.95
  -6   0  -4 3083.37  127.11
   6   0   5   45.61   86.10
   6   0   5   61.54   49.11
  -6   0  -5   -2.39   12.89
   6   0   6 5117.59  817.06
   6   0   6 5128.19  397.28
  -6   0  -6 4303.54  322.64
   6   0   7   94.42   81.05
   6   0   7   83.52   22.70
   6   0   8 3320.35  645.45
  -6   0  -9   40.29   41.23
  -6   0 -10  666.86  119.14
   6   2 -11  139.85   56.75
   6  -2 -11  122.07   49.82
   6   2 -10   22.72   41.65
   6  -2 -10   45.59   20.43
   6   2  -9  336.80   86.38
   6   2  -9  540.89  100.05
   6  -2  -9  452.19   86.09
   6  -2  -9  230.55   75.70
   6   2  -8  243.26   73.70
  -6   2   8  253.85   57.72
   6   2  -8  430.55   93.77
   6  -2  -8  195.13   53.76
  -6  -2   8  170.69   34.92
   6  -2  -8  268.07   61.91
  -6   2   7  150.80   34.44
   6   2  -7  175.31   42.34
   6   2  -7  289.87   66.54
   6  -2  -7  125.01   30.82
   6  -2  -7  203.43   45.52
  -6  -2   7  168.13   35.15
  -6   2   6  179.38   41.26
   6   2  -6  169.54   48.80
   6   2  -6  185.27   46.56
   6  -2  -6  136.79   40.66
   6  -2  -6  180.95   46.89
  -6  -2   6  114.96   29.39
   6   2  -5   -0.74   10.48
  -6   2   5   28.12   10.78
   6   2  -5   79.24   29.23
   6  -2  -5   49.98   21.36
  -6  -2   5   40.33   23.82
   6  -2  -5   61.41   23.95
   6   2  -4 1937.08   90.74
   6   2  -4 1999.93   86.63
  -6   2   4 1961.79   90.14
  -6   2   4 1880.52   77.31
   6  -2  -4 2247.69  118.32
   6  -2  -4 1985.41   91.28
  -6  -2   4 2015.82   85.54
  -6   2   3 2028.31   74.38
   6   2  -3 1698.14  142.07
  -6   2   3 1928.78   78.36
   6   2  -3 1754.48  150.93
   6  -2  -3 1937.98   84.26
  -6  -2   3 1910.85   70.51
   6  -2  -3 1928.01   79.08
   6   2  -2  230.21   32.70
   6   2  -2  197.87   37.41
  -6   2   2  161.23   29.51
  -6   2   2  167.90   28.71
  -6  -2   2  166.30   30.19
   6  -2  -2  122.59   26.54
   6  -2  -2  171.99   34.48
   6   2  -1   33.26   29.82
  -6   2   1   25.09   14.12
   6   2  -1   21.82   17.00
  -6   2   1    8.51   15.33
   6  -2  -1   72.34   45.79
  -6  -2   1   25.98   14.73
   6  -2  -1   51.72   30.02
  -6  -2   1   20.18   11.21
   6   2   0   77.84   14.28
  -6   2   0   33.46   18.95
   6   2   0   65.09   30.83
  -6   2   0   67.86   15.58
  -6  -2   0   34.65   11.82
   6  -2   0   23.07   16.07
   6  -2   0  115.32   77.78
  -6  -2   0   48.99   14.09
   6   2   1 1706.99  143.10
   6   2   1 2687.88  203.42
  -6   2  -1 1458.24  143.17
  -6   2  -1 1838.52  153.30
   6  -2   1 1908.47  303.83
   6  -2   1 2197.85   95.49
  -6  -2  -1 2245.74  109.13
  -6  -2  -1 1738.80  143.77
   6   2   2   23.04   50.89
  -6   2  -2   28.49   10.52
  -6   2  -2  103.32   18.31
   6   2   2  100.82   19.86
   6  -2   2   84.74   47.39
   6  -2   2   73.33   18.71
  -6  -2  -2   88.64   26.96
  -6  -2  -2  131.63   21.74
   6   2   3  166.63   53.66
   6   2   3  105.52   37.05
  -6   2  -3   52.51   23.20
  -6   2  -3   69.30   20.00
  -6  -2  -3   65.37   32.66
   6  -2   3   62.38   48.38
  -6  -2  -3   69.26   13.93
   6  -2   3  103.67   52.77
  -6   2  -4   55.89   68.12
   6   2   4  108.70   50.64
  -6   2  -4    6.44   12.74
   6   2   4   45.40   33.61
   6  -2   4   62.71   76.49
  -6  -2  -4   15.45   22.39
   6  -2   4  112.19   59.12
  -6  -2  -4   22.94    7.63
  -6   2  -5  354.62  109.75
   6   2   5  367.60  116.59
   6   2   5  374.80   71.21
   6  -2   5  597.87  102.43
   6  -2   5  450.24  154.18
  -6  -2  -5  332.67   60.59
   6   2   6  -22.36   69.45
   6   2   6   49.90   20.60
  -6   2  -6   33.39   20.02
   6  -2   6  287.06  104.86
   6  -2   6  124.89   87.95
  -6  -2  -6   20.25   10.48
   6   2   7  373.94  138.32
  -6   2  -7  136.12   49.96
   6  -2   7  515.09  159.25
   6  -2   7  526.18  141.22
   6   2   8  150.60   60.61
   6  -2   8  164.45   90.41
   6  -2   8  113.13   82.70
   6   2   9  263.66  145.16
  -6   2  -9  230.60   54.57
  -6   2 -10   86.05   50.41
  -6  -2 -10   81.75   39.41
   6   4 -11  137.67   49.31
   6  -4 -11   72.18   47.29
   6   4 -10  178.43   67.73
   6   4  -9  238.75   58.33
   6  -4  -9  254.44   57.18
   6  -4  -9   27.30   19.79
   6   4  -8  112.32   49.03
   6   4  -8  181.86   28.94
  -6  -4   8   88.32   18.24
   6  -4  -8   74.77   16.11
   6  -4  -8   67.81   17.58
  -6   4   7  541.16   88.93
   6   4  -7  464.48   87.50
   6   4  -7  575.90  128.75
   6  -4  -7  481.01  104.85
   6  -4  -7  614.27  119.93
  -6  -4   7  404.11   82.41
  -6   4   6  108.85   26.93
   6   4  -6   86.20   44.23
   6   4  -6  148.11   45.30
   6  -4  -6  108.96   29.90
   6  -4  -6  137.85   42.84
  -6  -4   6   93.23   27.97
   6   4  -5  513.15   67.45
  -6   4   5  667.34  106.37
   6   4  -5  654.87  131.53
   6  -4  -5  556.35   92.85
  -6  -4   5  509.47   66.83
   6  -4  -5  591.31  101.85
   6   4  -4  238.54   70.45
   6   4  -4  274.88   47.05
  -6   4   4  193.65   30.95
  -6   4   4  222.82   33.09
   6   4  -4  292.38   46.51
   6  -4  -4  157.03   32.14
  -6  -4   4  197.42   28.56
   6  -4  -4  204.21   39.40
  -6   4   3  120.07   20.14
   6   4  -3  124.49   25.78
   6   4  -3  105.81   28.09
  -6   4   3  133.21   28.70
   6  -4  -3   43.62   22.30
  -6  -4   3  112.69   19.60
   6  -4  -3   87.06   14.95
  -6   4   2 1448.03  130.78
   6   4  -2 1462.39  135.74
   6   4  -2 1661.52  149.70
  -6   4   2 1711.91  144.08
   6  -4  -2 1970.04  232.05
  -6  -4   2 1938.70  122.60
   6  -4  -2 1628.80  150.69
  -6   4   1  741.32  131.56
   6   4  -1  907.45   69.85
  -6   4   1  722.47   48.61
   6   4  -1  666.27   56.11
   6  -4  -1  850.59  127.05
  -6  -4   1  919.82   70.23
   6  -4  -1  619.74   44.76
  -6   4   0 2294.93   91.14
   6   4   0 2729.58  115.14
  -6   4   0 3046.84  108.47
   6   4   0 2720.00   99.32
   6  -4   0 2501.76  125.81
  -6  -4   0 2668.79   96.46
   6  -4   0 2696.60  110.94
  -6  -4   0 2774.08   99.23
   6   4   1 4710.79  155.89
   6   4   1 4487.38  295.51
  -6   4  -1 3673.00  140.76
   6  -4   1 5319.07  189.90
   6  -4   1 4479.41  299.60
  -6  -4  -1 5088.13  170.06
   6   4   2  106.89   22.01
  -6   4  -2  235.85   51.69
   6   4   2  302.28   85.12
  -6   4  -2  159.42   41.00
  -6  -4  -2  224.58   52.32
   6  -4   2  144.82   34.87
   6  -4   2  292.69  105.22
  -6  -4  -2  138.34   20.42
   6   4   3   85.46   27.33
   6   4   3  153.42   71.82
  -6   4  -3   30.28   43.28
  -6  -4  -3   21.27   20.16
   6  -4   3  262.71  119.52
   6  -4   3   85.33   39.57
  -6  -4  -3   25.81   11.21
   6   4   4  239.35   98.94
   6   4   4  193.59   38.82
  -6   4  -4  164.01   38.29
   6  -4   4   55.37   72.19
  -6  -4  -4  212.63   52.02
   6  -4   4  177.87   55.46
  -6  -4  -4  157.45   26.05
   6   4   5  331.06   75.05
   6   4   5  246.09   65.65
  -6   4  -5  251.02   75.24
   6  -4   5  128.81   88.58
  -6  -4  -5  394.59   59.51
   6  -4   5  577.28  110.02
   6   4   6 1109.06  212.90
  -6   4  -6  455.97  148.77
   6  -4   6 1266.03  285.51
  -6  -4  -6  991.59  149.40
   6  -4   6 1080.56  261.85
   6   4   7 1385.24  380.06
  -6   4  -7  419.68  152.15
   6  -4   7 1393.38  355.61
   6  -4   7 1097.01  191.37
   6   4   8  167.52   97.99
  -6   4  -8  192.72   56.38
   6  -4   8  148.61   92.63
   6   4   9  109.03   55.08
  -6   4  -9   41.76   31.39
  -6  -4 -10   71.75   27.83
   6   6 -11  -66.55   40.25
   6  -6 -11   55.26   32.99
   6   6 -10  358.14   94.35
   6   6 -10  700.76  142.69
   6  -6 -10  459.99  126.66
   6   6  -9    8.89   15.54
   6   6  -9   10.92   31.19
   6  -6  -9   -5.46   25.23
   6   6  -8 3660.24  449.21
   6   6  -8 3064.84  367.18
   6  -6  -8 2420.68  288.77
   6  -6  -8 3050.72  369.57
   6  -6  -8 1987.30  247.15
   6   6  -7 1050.22  220.95
   6   6  -7  661.77  129.52
  -6   6   7  758.17  115.42
   6  -6  -7  752.67  168.79
   6  -6  -7  294.40   70.10
   6   6  -6 4752.53  249.19
  -6   6   6 4510.79  230.48
   6   6  -6 4263.03  235.70
  -6  -6   6 3903.14  207.92
   6  -6  -6 4082.81  232.65
   6   6  -5   90.67   19.42
  -6   6   5   70.97   15.34
   6   6  -5   82.97   48.00
   6  -6  -5   45.62   22.26
  -6  -6   5  111.56   34.35
   6  -6  -5  116.04   35.25
   6   6  -4 2074.22  330.92
   6   6  -4 1855.72   81.20
   6   6  -4 1832.48   94.29
  -6   6   4 1834.88   82.85
  -6   6   4 1753.24   83.03
   6  -6  -4 2131.06  232.41
  -6  -6   4 1703.79   76.70
   6  -6  -4 1789.95   93.24
   6   6  -3  433.38  108.70
  -6   6   3  219.01   29.78
   6   6  -3  297.74   61.11
   6   6  -3  280.03   40.45
  -6   6   3  242.47   34.50
   6  -6  -3  294.75   44.79
   6  -6  -3  238.46   43.67
  -6  -6   3  223.99   40.54
   6   6  -224698.57  833.88
  -6   6   227363.05 2208.73
   6   6  -222237.39  721.43
   6   6  -223112.78  750.81
  -6   6   224316.62  790.13
   6  -6  -223535.78  764.18
   6  -6  -222800.33  757.45
  -6  -6   223685.49  767.24
  -6   6   1   21.73   12.93
   6   6  -1  123.44   40.09
   6   6  -1   27.29   16.06
  -6   6   1   98.77   26.44
   6  -6  -1   73.09   21.29
  -6  -6   1   86.66   18.22
   6  -6  -1   94.05   21.27
   6   6   0 8621.18  285.94
   6   6   0 9332.43  320.85
  -6   6   0 8457.57  284.23
  -6  -6   0 8501.82  283.43
   6  -6   0 7453.36  278.98
   6   6   1  640.42   74.66
  -6   6  -1 1079.84  221.33
  -6   6  -1  752.42   70.95
   6   6   1  597.31   55.32
   6  -6   1  510.07   83.33
  -6  -6  -1  635.69   68.80
   6  -6   1  681.37   96.54
  -6   6  -2 4140.09  163.75
  -6   6  -2 4867.37  264.71
   6   6   2 3591.86  243.92
  -6  -6  -2 3810.63  158.11
   6  -6   2 4682.50  264.72
   6   6   3 1581.34  173.36
  -6   6  -3 1477.35  115.34
  -6   6  -3 1619.73   77.56
   6  -6   3  999.52  247.94
   6  -6   3 1167.43  233.50
  -6  -6  -3 1562.04  142.56
  -6  -6  -3 1146.08  104.04
  -6   6  -414703.10 3034.33
   6   6   414157.89 2942.17
  -6  -6  -416103.93 3323.98
   6  -6   414640.61 3028.60
   6  -6   412261.53  759.35
  -6  -6  -410452.50  581.10
   6   6   5  982.78  198.37
  -6   6  -5  829.32  138.56
   6  -6   5  825.75  305.66
   6  -6   5  872.56  138.32
  -6  -6  -5 1043.27  117.54
  -6   6  -6 2799.72  221.22
   6   6   6 4557.80  392.47
   6  -6   6 4266.24  355.70
  -6  -6  -6 4844.17  356.99
   6  -6   6 3699.55  442.73
  -6  -6  -6 3759.13  277.45
   6   6   7  386.70  148.24
  -6   6  -7  295.30   64.50
   6  -6   7  237.08  105.56
  -6  -6  -7  137.53   37.55
   6   6   8 1948.27  550.11
  -6   6  -8 2005.87  332.18
   6  -6   8 1196.11  409.67
  -6   6  -9   16.72   34.60
   6  -6   9   -5.27   33.38
  -6   6 -10 2230.91  351.07
  -6  -6 -10 1873.81  293.68
   6   8 -11   35.26   19.63
   6   8 -11   62.06   36.78
   6  -8 -11   62.51   31.91
   6   8 -10   85.95   36.67
   6   8 -10  281.28  102.24
   6  -8 -10   78.55   35.67
   6   8  -9   58.52   29.70
   6   8  -9  216.33   51.48
   6  -8  -9   80.07   26.41
   6   8  -8  236.21   63.66
   6   8  -8  242.94  115.12
   6  -8  -8  213.12   62.29
   6   8  -7  471.30   99.79
   6   8  -7  533.96   84.59
   6  -8  -7  457.19   80.43
   6   8  -6  669.64   85.68
  -6   8   6  597.37   71.89
   6   8  -6  648.81   94.11
  -6  -8   6  470.26   81.13
   6  -8  -6  661.96  104.50
  -6   8   5   22.63    7.46
   6   8  -5  113.72   30.16
   6   8  -5   26.88   26.54
   6  -8  -5   30.34   20.15
   6  -8  -5  -18.92   22.55
  -6  -8   5  135.61   40.74
   6   8  -4   48.91   25.31
  -6   8   4   16.46    7.54
   6   8  -4   56.78   24.53
   6   8  -4   51.00   28.45
  -6  -8   4   -4.56   19.06
   6  -8  -4   45.82   16.80
   6  -8  -4   46.57   20.25
   6   8  -3  499.32   82.53
  -6   8   3  387.02   53.03
   6   8  -3  512.11   50.41
   6   8  -3  510.31   52.79
  -6   8   3  468.42   71.10
   6  -8  -3  341.51   57.87
   6  -8  -3  424.31   59.50
  -6  -8   3  470.79   66.34
   6   8  -2  445.19   80.64
  -6   8   2  387.59   52.34
   6   8  -2  460.64   57.67
   6   8  -2  411.36   43.79
  -6   8   2  580.23   81.84
   6  -8  -2  381.67   80.94
   6  -8  -2  458.70   75.10
  -6  -8   2  427.38   45.59
   6   8  -1 3138.86  210.53
  -6   8   1 2211.43  104.86
   6   8  -1 2542.25  101.56
   6   8  -1 2826.81  103.33
  -6   8   1 3139.98  115.90
   6  -8  -1 2859.54  110.77
   6  -8  -1 3670.41  180.26
  -6  -8   1 2974.38  108.97
   6   8   0   34.81   13.42
  -6   8   0   35.64   43.76
   6   8   0   43.89   19.10
   6   8   0   38.70   17.40
  -6   8   0    7.85   13.77
   6  -8   0  132.85   37.59
   6  -8   0   84.82   38.38
  -6  -8   0   17.98   20.05
   6   8   1  935.19  135.39
  -6   8  -1 1003.47  112.91
   6   8   1  957.69  170.28
   6   8   1  860.54   78.50
  -6   8  -1  887.50   82.35
   6  -8   1  983.23  167.95
   6  -8   1  864.08  141.97
  -6  -8  -1 1015.35  103.94
   6   8   2   95.11   24.25
  -6   8  -2  160.30   52.72
   6   8   2  103.72   33.35
  -6   8  -2   99.52   21.74
  -6  -8  -2  122.55   24.46
   6  -8   2  231.11   81.71
   6  -8   2  158.73   60.96
   6   8   3   93.42   56.16
  -6   8  -3   77.60   51.47
  -6   8  -3  220.53   46.18
   6  -8   3  155.84   78.18
   6  -8   3  274.72   84.65
  -6  -8  -3  121.90   22.69
  -6   8  -4   86.41   17.24
   6   8   4   83.45   53.66
  -6  -8  -4   36.04   20.90
   6  -8   4  130.25   37.29
   6  -8   4  136.36   76.24
   6   8   5  123.35   64.91
  -6   8  -5   84.92   37.13
   6  -8   5   99.01   59.33
   6  -8   5  -33.83   60.53
   6   8   6   55.59   29.01
  -6   8  -6   43.82   28.84
   6  -8   6    9.54   71.15
   6   8   7   61.84   76.03
  -6   8  -7   98.19   35.72
   6  -8   7   93.86   39.63
  -6  -8  -7   16.13    6.83
  -6  -8  -7    7.04    3.92
   6   8   8  100.86   78.55
  -6   8  -8  122.88   48.22
   6  -8   8  151.56   70.00
   6   8   9  230.39  101.66
  -6   8  -9  564.54   58.35
   6  -8   9  202.53  145.12
   6   8  10   24.66  101.60
  -6   8 -10   36.06   32.91
   6  10 -11   98.71   41.50
   6  10 -11  170.17   64.05
   6 -10 -11   82.48   19.83
   6  10 -10   99.65   44.51
   6 -10 -10   43.19   17.90
   6  10  -9   61.00   26.32
   6  10  -9   66.72   38.13
   6 -10  -9  109.45   29.57
   6  10  -8 1408.68  171.43
   6  10  -8 1546.84  168.46
   6 -10  -8 1435.24  196.27
   6  10  -7 1601.34  153.94
   6 -10  -7 1733.90  175.75
   6  10  -6 4440.70  254.19
   6 -10  -6 4686.53  272.76
   6  10  -5  932.81  130.01
  -6  10   5  881.11  100.00
   6 -10  -5  820.55  121.07
   6 -10  -5 1141.30  175.38
   6  10  -4 1006.19  167.03
   6  10  -4 1278.53  160.58
  -6  10   4 1416.65  293.19
  -6 -10   4 1445.73  302.28
   6 -10  -4 1424.34  310.41
   6 -10  -4 1307.02  174.89
   6  10  -3 1440.16  281.66
  -6  10   3 1749.47  123.43
   6  10  -3 1474.62   72.08
  -6  10   3 1603.10   88.25
  -6 -10   3 1647.96  107.78
   6 -10  -3 1587.69   79.73
   6 -10  -3 1535.06  138.38
   6  10  -2 4110.77  233.33
  -6  10   2 3344.88  137.88
   6  10  -2 4240.04  185.41
  -6  10   2 4728.20  190.49
  -6 -10   2 4037.61  162.79
   6 -10  -2 4201.88  169.40
   6 -10  -2 4571.38  263.92
   6  10  -1 5901.49  232.36
  -6  10   1 7950.83  330.55
   6  10  -1 5680.64  222.52
   6  10  -1 5693.53  260.28
  -6  10   1 6212.47  243.25
   6 -10  -1 6165.55  323.66
   6 -10  -1 8431.92  336.81
   6  10   0 7382.08  321.80
  -6  10   0 8153.43  341.92
   6  10   0 6699.32  263.54
   6  10   0 7525.47  288.15
  -6  10   0 8125.03  314.09
   6 -10   0 8320.88  330.08
   6 -10   0 8178.81  500.00
  -6 -10   0 8326.10  321.26
   6  10   1 1386.38  170.31
  -6  10  -1 1115.25  113.20
   6  10   1 1372.49  128.64
   6  10   1 1303.21  110.04
  -6  10  -1 1186.33  110.93
   6 -10   1  931.81  128.03
   6 -10   1 1166.50  276.86
  -6 -10  -1 1209.53  106.43
   6  10   2  723.71   83.65
  -6  10  -2  563.83  112.66
  -6  10  -2  677.32   90.37
   6 -10   2  826.23  204.78
   6 -10   2 1195.39  145.05
  -6 -10  -2  860.58   96.71
  -6  10  -3 1233.93  160.23
   6  10   3  785.30  156.35
  -6 -10  -3  996.59  153.72
   6 -10   3 1094.57  324.44
   6 -10   3 1128.28  273.58
   6  10   4 3280.65  334.80
  -6  10  -4 2817.10  159.55
   6 -10   4 2367.77  221.82
   6 -10   4 2458.68  381.08
   6  10   5 3424.25  317.44
  -6  10  -5 3327.96  207.02
   6 -10   5 3908.76  292.93
   6  10   6  227.52   71.22
  -6  10  -6  269.81   69.63
   6 -10   6   98.40   31.90
   6  10   7  -25.61   86.20
  -6  10  -7   57.69   31.22
   6 -10   7   81.54   81.35
   6  10   8  496.96  182.51
  -6  10  -8  438.95   80.55
   6 -10   8  508.68  108.99
   6  10   9  732.14  278.02
  -6  10  -9  831.14  284.94
   6 -10   9  922.17  347.56
  -6  10 -10 1119.30  167.71
   6 -10  10  586.16  289.25
   6  12 -11  117.16   52.13
   6  12 -11  244.31  108.55
   6  12 -10  304.67  155.77
   6  12 -10  633.44  225.83
   6 -12 -10  646.90  141.57
   6  12  -9  216.17   96.65
   6 -12  -9  381.11  117.79
   6  12  -8  235.96   69.95
   6 -12  -8  213.37   56.70
   6  12  -7 1216.20  154.16
   6 -12  -7 1245.33  202.46
   6  12  -6 1358.35  203.10
   6 -12  -6 1499.50  219.73
   6  12  -5 1488.16  212.22
  -6  12   5 1167.95  130.98
   6 -12  -5 1214.98  150.32
  -6  12   4 2287.09  130.26
   6  12  -4 2600.36  156.80
  -6  12   4 2358.83  134.28
   6 -12  -4 2499.64  151.93
   6  12  -3 1262.64  147.55
  -6  12   3  994.35   95.93
   6  12  -3 1180.86  113.56
  -6 -12   3  994.68   96.66
   6 -12  -3  779.00  141.02
   6 -12  -3 1128.52  133.66
   6  12  -2  372.45   77.65
  -6  12   2  407.67   58.42
   6  12  -2  362.76   80.04
  -6  12   2  252.64   38.85
  -6 -12   2  238.58   46.91
   6 -12  -2  276.38   53.27
   6 -12  -2  247.50   87.96
   6  12  -1  182.28   55.31
  -6  12   1   74.34   33.17
   6  12  -1  151.49   31.32
  -6  12   1  138.36   26.46
  -6 -12   1  109.36   20.50
   6 -12  -1  166.34   47.94
   6 -12  -1  245.01   81.31
   6  12   0 1326.46  126.60
  -6  12   0 1628.32  104.84
   6  12   0 1298.01  142.04
   6  12   0 1363.34  114.51
  -6  12   0 1535.88  151.37
   6 -12   0 1401.36  170.22
   6 -12   0 1512.51  312.67
  -6 -12   0 1694.00   96.95
   6  12   1  514.75   57.99
  -6  12  -1  527.76   98.10
   6  12   1  924.04  160.03
   6  12   1  436.63   59.18
  -6  12  -1  471.86   80.66
   6 -12   1  512.62   99.05
   6 -12   1  471.71  101.91
  -6 -12  -1  571.54   68.57
   6  12   2 3062.03  165.78
  -6  12  -2 2323.28  154.14
  -6  12  -2 4331.53  185.46
   6 -12   2 2846.94  198.20
   6 -12   2 3666.38  213.86
  -6 -12  -2 2951.95  190.92
   6  12   3 1108.00  201.56
   6 -12   3  703.27  126.66
   6 -12   3 1251.17  182.36
   6  12   4   73.82   61.93
  -6  12  -4   45.15   35.04
   6 -12   4  111.33   70.05
   6  12   5   84.72   52.61
  -6  12  -5  168.76   46.99
   6 -12   5  205.70   79.53
   6  12   6  549.90  136.51
  -6  12  -6  643.52  150.86
   6 -12   6  640.32  171.45
   6  12   7   80.38   50.33
  -6  12  -7  476.99   86.32
   6 -12   7  420.99  128.01
   6  12   8  300.99  137.16
  -6  12  -8  368.04   76.91
   6 -12   8  500.99  166.03
   6  12   9  237.04   99.08
  -6  12  -9   10.53   37.68
   6 -12   9  104.79   57.07
   6  14 -11   80.65   32.66
   6 -14 -11   34.03   15.79
   6  14 -10   64.09   20.09
   6 -14 -10   80.62   26.55
   6  14  -9  228.12   81.77
   6 -14  -9  321.81   60.65
   6  14  -8  265.71   82.00
   6 -14  -8  236.78   59.91
   6  14  -7   -5.75   20.27
   6 -14  -7   60.64   26.05
   6  14  -6  784.11  108.34
   6 -14  -6  651.34  115.34
   6  14  -5  235.75   59.93
   6 -14  -5  118.70   35.38
  -6  14   4   -1.56    7.56
   6  14  -4   28.33   13.07
  -6  14   4   12.99    9.41
   6 -14  -4   34.13   16.38
  -6  14   3   19.06    9.73
   6  14  -3  -17.47   20.14
  -6  14   3   24.11   15.70
   6  14  -3   -0.89   30.63
   6 -14  -3   51.32   21.55
  -6  14   2  478.97   89.68
   6  14  -2  550.10  119.04
  -6  14   2  351.28   46.56
   6 -14  -2  633.57  132.16
  -6  14   1  416.18   59.79
   6  14  -1  422.51   78.27
  -6  14   1  389.46   48.15
   6  14  -1  370.78   62.36
   6 -14  -1  451.10   91.00
  -6  14   0  224.79   62.16
   6  14   0  464.76   86.78
  -6  14   0  394.89   81.93
   6  14   0  288.44   47.05
   6 -14   0  326.94   72.11
   6  14   1 1184.27  168.57
  -6  14  -1 1373.65  296.46
   6  14   1 1203.30  178.05
   6  14   1 1237.98  149.28
   6 -14   1  826.22  188.39
   6  14   2  141.30   46.59
  -6  14  -2   42.60   23.85
   6 -14   2  229.46  102.30
   6  14   3   68.00   44.56
  -6  14  -3   36.58   27.14
   6 -14   3  169.98   81.97
   6  14   4  280.89   63.08
  -6  14  -4  311.18   82.98
   6 -14   4  209.76   74.33
   6  14   5   99.05   53.35
  -6  14  -5  280.97   52.89
   6 -14   5  191.30   97.31
   6  14   6    5.13   32.51
  -6  14  -6   39.24   20.42
   6 -14   6   74.76   80.08
   6  14   7  525.13  122.76
  -6  14  -7  948.01  192.28
   6 -14   7  439.82  181.22
   6  14   8  277.41  100.09
  -6  14  -8  274.52   72.99
   6 -14   8  154.62  105.20
  -6  14  -9  210.91   49.80
   6 -14   9   85.50   96.80
  -6  14 -10  166.41   87.39
   6 -14  10  132.53  120.12
   6  16 -10  479.49  216.04
   6 -16 -10  651.11  155.66
   6  16  -9   73.63   26.07
   6 -16  -9   59.42   25.06
   6  16  -8 1494.00  170.06
   6 -16  -8 1205.07  221.44
   6  16  -7  129.00   43.53
   6 -16  -7  245.32   65.57
   6  16  -6 1174.95  150.86
   6 -16  -6 1030.78  191.21
   6  16  -5 3574.89  280.25
   6 -16  -5 3859.47  301.11
  -6  16   4 6367.30  357.30
   6  16  -4 6107.58  347.80
  -6  16   4 6141.64  342.79
   6 -16  -4 5853.85  343.40
  -6  16   3 6340.75  338.89
   6  16  -3 4996.49  264.43
  -6  16   3 5127.98  275.99
   6  16  -3 4652.09  282.44
   6 -16  -3 4582.51  243.56
  -6  16   2  787.76  133.11
   6  16  -2 1047.79  131.51
  -6  16   2  932.37  114.63
   6  16  -2  980.03  151.81
   6 -16  -2 1361.13  307.33
  -6  16   1  803.13  137.44
   6  16  -1  748.29   94.77
  -6  16   1  867.73  107.69
   6  16  -1  594.04   90.92
   6 -16  -1  986.39  195.09
  -6  16   0 3036.17  239.83
   6  16   0 3574.30  209.03
  -6  16   0 3672.08  223.74
   6  16   0 3886.13  260.71
   6 -16   0 3094.91  302.78
   6  16   1 1384.08  291.65
  -6  16  -1 1487.51  310.66
   6 -16   1 2202.39  360.33
   6  16   211222.69  617.12
  -6  16  -2 9457.84  489.96
   6 -16   2 9985.47  554.52
   6  16   3 3632.16  222.29
  -6  16  -3 4128.07  245.34
   6 -16   3 3063.28  225.41
   6  16   4  128.61   44.08
  -6  16  -4  201.38   40.99
   6 -16   4  160.33   68.88
   6  16   5  745.07  137.02
  -6  16  -5  225.95   39.44
   6 -16   5  243.14  151.10
  -6  16  -6 3266.37  319.37
   6 -16   6 2418.47  713.15
   6  16   7  172.11   69.92
  -6  16  -7  278.37   46.76
   6 -16   7  512.86  141.95
   6  16   8 2506.51  455.84
  -6  16  -8 2692.20  421.66
   6 -16   8 1380.16  623.81
   6  16   9  684.04  252.70
  -6  16  -9 1148.57  269.07
   6 -16   9  731.66  314.18
   6  18 -10   54.85   14.62
   6 -18 -10   32.93   20.31
   6  18  -9   38.06   20.08
   6 -18  -9   35.73   13.06
   6  18  -8  226.21   86.21
   6 -18  -8  321.84   86.71
   6  18  -7  733.47  188.59
   6 -18  -7  737.48  131.98
   6  18  -6  423.37  113.15
   6 -18  -6  383.78   79.49
   6  18  -5  683.68  126.23
   6 -18  -5  720.66  123.91
  -6  18   4  317.68   88.84
   6  18  -4  833.95  128.68
  -6  18   4  687.37  118.04
   6 -18  -4  871.07  165.29
  -6  18   3  480.23  118.02
   6  18  -3  753.38   96.99
  -6  18   3  670.30   81.84
  -6 -18   3  787.07  139.65
   6 -18  -3 1133.50  170.17
  -6  18   2  154.68   55.58
   6  18  -2  207.67   51.44
  -6  18   2  307.52   45.29
   6  18  -2  159.78   68.83
  -6 -18   2   38.71   58.10
   6 -18  -2  219.02   69.49
  -6  18   1  214.96   64.72
   6  18  -1  349.92   80.95
  -6  18   1  293.55   59.42
   6  18  -1  309.05   59.50
  -6 -18   1  369.84   92.25
   6 -18  -1  191.03   67.28
  -6  18   0 1069.75  141.65
   6  18   0 1309.60  154.75
  -6  18   0 1366.37  160.73
   6  18   0  974.88  142.64
   6 -18   0 1177.52  200.63
   6  18   1 1526.18  201.69
  -6  18  -1 1669.90  194.15
   6  18   1 2017.93  131.96
   6 -18   1 2115.12  177.62
   6  18   2   45.05   28.40
  -6  18  -2   64.82   27.74
   6  18   2   35.22   10.78
   6  18   2   43.99   16.39
   6 -18   2  123.19   83.47
   6  18   3  918.93  168.81
  -6  18  -3  999.38  154.58
   6 -18   3  861.36  175.22
   6  18   4 1387.89  247.94
  -6  18  -4 2198.99  189.36
   6 -18   4 1543.16  306.78
   6  18   5  192.68   46.03
  -6  18  -5  430.84  103.27
   6 -18   5  236.68  116.08
   6  18   6  167.80   92.50
  -6  18  -6   73.32   22.47
   6 -18   6    0.32   96.08
   6  18   7  155.50   67.64
  -6  18  -7  435.34   99.61
   6 -18   7  543.80  152.32
   6  18   8   66.76   81.22
  -6  18  -8   87.67   56.14
   6 -18   8  112.51   78.02
  -6  18  -9   85.05   51.53
   6 -18   9   88.93  114.67
   6  20 -10  171.92   66.23
   6 -20 -10  269.33   90.58
   6  20  -9  105.50   38.99
   6 -20  -9   61.75   25.52
   6 -20  -8   77.63   38.79
   6  20  -7  150.28   33.96
   6  20  -6  415.30  123.70
   6 -20  -6  406.53  100.07
   6  20  -5 1098.40  187.70
   6 -20  -5 1088.62  191.20
  -6  20   4  662.14  109.47
   6  20  -4 1382.11  200.62
  -6  20   4 1428.24  162.75
  -6 -20   4 1824.98  241.19
   6 -20  -4 2058.59  347.14
   6  20  -3  102.31   38.66
  -6  20   3   17.70   13.43
  -6 -20   3  210.04  106.10
   6 -20  -3   97.02   32.82
  -6  20   2   95.85   29.02
   6  20  -2  113.31   40.84
  -6  20   2   66.29   18.91
  -6 -20   2  116.15   75.02
   6 -20  -2   89.74   49.52
   6  20  -1   68.69   28.39
  -6  20   1  121.77   33.94
  -6 -20   1  226.68   83.26
   6 -20  -1   98.84   33.05
   6  20   0   51.48   23.80
  -6  20   0   75.16   23.48
   6  20   0   82.94   39.68
  -6 -20   0   72.40   70.82
   6 -20   0  132.10   52.19
   6  20   1  577.97  109.93
  -6  20  -1  691.66  140.49
   6  20   1  330.19   75.20
   6 -20   1  490.91  115.39
   6  20   2  781.85  128.21
  -6  20  -2  597.84  125.19
   6  20   2  279.01   54.69
   6 -20   2  651.96  204.86
   6  20   3  127.36   38.24
  -6  20  -3   58.01   28.47
   6 -20   3  235.61  111.09
   6  20   4  745.81  144.18
  -6  20  -4  741.89  128.89
   6 -20   4  588.14  163.69
   6  20   5   91.87   31.54
  -6  20  -5   91.12   39.86
   6 -20   5  244.28  112.76
   6  20   6  -88.84   58.57
  -6  20  -6   46.28   22.33
   6 -20   6   32.72  109.87
   6  20   7  238.08   89.99
  -6  20  -7  243.83   61.56
   6 -20   7  274.50  164.79
   6  20   8  157.09   90.01
  -6  20  -8   23.37   42.93
   6 -20   8   86.73   61.21
  -6  20  -9   34.96   43.43
   6 -20   9  138.46  105.71
   6  22  -9  248.34  139.00
   6 -22  -9  285.56  108.58
   6  22  -8 1214.14  297.75
   6 -22  -8 1385.05  289.31
   6  22  -7  502.12  140.76
   6 -22  -7  429.01  128.10
   6  22  -6 2310.75  273.49
   6 -22  -6 2901.64  413.28
   6  22  -5 1078.40  220.73
  -6 -22   5 1306.93  216.44
   6 -22  -5 1423.01  241.24
  -6  22   4  194.15   85.63
   6  22  -4  390.53  110.66
  -6  22   4  335.10   72.70
  -6 -22   4  178.08   94.24
   6 -22  -4  458.02  102.67
  -6  22   3 3235.19  316.76
   6  22  -3 3671.64  305.25
  -6  22   3 4108.94  335.05
  -6 -22   3 4207.16  427.21
   6 -22  -3 4062.73  345.64
  -6  22   2 7814.85  652.03
   6  22  -210840.39  157.17
  -6  22   2 9918.83  153.89
  -6 -22   210574.96  257.84
   6 -22  -2 9082.86  744.22
   6  22  -1   71.45   27.23
  -6  22   1   68.34   24.20
   6  22  -1   26.35   33.96
  -6 -22   1  219.46  104.77
   6 -22  -1  120.30   37.65
   6  22   0 4299.43  328.09
  -6  22   0 4284.43  323.53
   6  22   0 4311.63  339.37
   6 -22   0 5791.06  737.86
  -6 -22   0 3899.78  438.10
   6  22   1  281.26   57.61
  -6  22  -1  261.59   64.06
  -6 -22  -1  250.90   76.88
   6 -22   1  296.31  129.70
   6  22   2   72.49   31.51
  -6  22  -2   47.68   27.32
   6  22   2   30.70   10.24
   6 -22   2  217.57  105.87
   6  22   3 1623.34  295.07
  -6  22  -3 1418.36  178.93
   6 -22   3 1221.77  292.22
   6  22   4 2343.89  317.11
  -6  22  -4 3335.72  325.61
   6 -22   4 2694.18  630.65
   6  22   5   18.17   23.53
  -6  22  -5   72.05   26.80
   6 -22   5  -46.78   93.37
   6  22   6 2588.59  358.36
  -6  22  -6 2195.24  275.61
   6 -22   6 2131.41  303.81
   6  22   7  916.42  249.85
  -6  22  -7 1078.64  342.48
   6 -22   7 1589.37  391.96
  -6  22  -8 1394.11  190.53
   6 -22   8  597.54  273.41
   6  24  -9   95.42   46.94
   6 -24  -9   89.84   22.95
   6  24  -8   37.89   15.43
   6 -24  -8   46.54   16.73
   6  24  -7  207.75   63.39
   6 -24  -7  175.87   67.93
   6  24  -6   64.90   17.74
  -6 -24   6  -16.82   92.92
   6 -24  -6  194.20   57.09
   6  24  -5   51.53   27.12
  -6 -24   5  184.31   99.37
   6 -24  -5   93.11   42.51
   6  24  -4  220.25   89.64
  -6  24   4  210.37   67.41
  -6 -24   4  217.75   85.64
   6 -24  -4  301.42   93.13
  -6  24   3   89.36   52.00
   6  24  -3  235.99   55.39
  -6  24   3  293.56   57.26
  -6 -24   3  478.75  171.12
   6 -24  -3  124.20   42.83
  -6  24   2  327.74   94.14
  -6  24   2  459.41   80.47
  -6 -24   2  319.51  126.69
   6 -24  -2  389.34  100.06
   6  24  -1 2949.84  357.05
  -6  24   1 2501.40  302.04
   6  24  -1 1849.15  368.85
  -6 -24   1 2139.71  616.88
   6 -24  -1 1605.80  274.29
   6  24   0  133.98   49.78
  -6  24   0  231.19   50.87
   6  24   0  126.63   35.50
  -6 -24   0   65.20   52.25
   6 -24   0  177.69   99.67
   6  24   1 2338.91  284.15
  -6  24  -1 2651.39  321.37
  -6 -24  -1 2177.35  398.15
   6 -24   1 2209.35  589.54
   6  24   2  102.94   22.23
  -6  24  -2  206.08   54.34
   6  24   2   77.82   18.28
   6 -24   2  160.38   95.96
  -6 -24  -2  140.68   42.01
   6  24   3   93.01   34.72
  -6  24  -3   58.00   33.45
   6 -24   3  -18.89   87.17
   6  24   4  185.63   81.54
  -6  24  -4  270.19   73.64
   6 -24   4  389.57  129.96
   6  24   5  160.59   46.87
  -6  24  -5  288.02   85.29
   6 -24   5  463.46  164.35
   6  24   6   83.34   74.30
  -6  24  -6  106.21   54.50
   6 -24   6  111.55   71.39
  -6  24  -7  133.85   46.44
   6 -24   7  323.60  142.61
  -6  24  -8  107.10   51.44
   6 -24   8  234.97  125.03
   6 -26  -8   -1.84   38.76
   6  26  -7 1225.69  288.36
   6 -26  -7 1550.03  357.27
   6  26  -6   61.28   29.12
  -6 -26   6   13.88   98.27
   6 -26  -6   17.71   31.38
   6  26  -5  130.41   34.16
  -6 -26   5  -56.15   90.10
  -6  26   4  305.36   40.77
   6  26  -4  335.95  117.79
  -6 -26   4  503.14  191.42
   6 -26  -4  337.96   84.03
   6  26  -3  928.06  121.46
  -6  26   3  680.52  145.22
  -6 -26   3  650.30  195.94
   6 -26  -3  514.29  137.20
   6  26  -2 1943.36  206.54
  -6  26   2 1698.10  168.36
  -6 -26   2 1053.27  436.29
   6 -26  -2  933.81  248.91
   6  26  -1 1157.28  249.06
  -6  26   1  946.88  178.30
  -6 -26   1  583.40  221.55
   6 -26  -1 1589.52  244.67
   6  26   0   76.94   32.20
  -6  26   0   96.79   32.90
  -6 -26   0   15.22   27.07
   6 -26   0   53.79   71.67
   6  26   1  767.20  205.74
  -6  26  -1  855.54  208.09
  -6 -26  -1  477.43  215.63
   6 -26   1  810.01  235.47
   6  26   2   17.86   18.23
  -6  26  -2  -10.06   31.76
  -6 -26  -2   31.34   34.71
   6 -26   2   43.25   82.31
   6  26   3  665.98  126.38
  -6  26  -3  645.41  175.02
   6 -26   3  367.37  144.93
   6  26   4  165.21   61.29
  -6  26  -4  276.77   64.07
   6 -26   4  144.66  123.36
   6  26   5  655.88  110.65
  -6  26  -5 1046.58  200.64
   6 -26   5 1184.83  252.76
   6  26   6   78.71   59.63
  -6  26  -6  -17.56   37.89
   6 -26   6  259.24  116.61
   6  26   7   64.56   51.27
  -6  26  -7  217.77   92.23
   6 -26   7  365.29  164.31
   6  28  -7  334.50   96.47
   6 -28  -7  213.71   82.48
   6  28  -6  742.62  126.15
  -6 -28   6  305.38  145.50
   6 -28  -6  446.57  128.75
   6  28  -5  102.43   27.27
  -6 -28   5  262.53   91.08
   6 -28  -5   69.01   32.54
   6  28  -4 1482.12  159.17
  -6 -28   4  816.04  402.30
   6 -28  -4  788.77  227.89
   6  28  -3   68.73   44.19
  -6  28   3   38.94   26.34
  -6 -28   3  105.77   68.80
   6 -28  -3  103.16   45.75
   6  28  -2  480.82  157.73
  -6  28   2  581.76   78.77
   6 -28  -2 1025.72  236.79
   6  28  -1  349.55   84.76
  -6  28   1  349.82   73.62
  -6 -28   1  101.77   89.43
   6 -28  -1  389.63  127.19
   6  28   0 1368.98  178.15
  -6  28   0 1342.21  170.32
   6 -28   0 1486.48  316.63
   6  28   1   28.72   22.60
  -6  28  -1   68.12   30.65
  -6 -28  -1   -1.13   39.32
   6 -28   1  218.50  100.61
   6  28   2 1105.75  142.26
  -6  28  -2 1045.42  199.46
   6 -28   2 1052.41  396.41
   6  28   3  210.02   64.12
  -6  28  -3  181.53   47.88
   6 -28   3  275.31  110.21
   6  28   4  369.82   98.30
  -6  28  -4  495.16   89.49
   6 -28   4  568.42  150.36
   6  28   5  670.45  144.34
  -6  28  -5  709.53  227.98
   6 -28   5  707.07  192.20
   6  28   6  244.44   83.15
  -6  28  -6  387.93   96.89
   6 -28   6  577.10  182.01
   6  30  -7   33.87   19.39
  -6 -30   7   -7.08  107.74
   6 -30  -7   73.43   54.25
   6  30  -6  554.97  186.09
  -6 -30   6  143.23  117.99
   6 -30  -6  424.87  139.75
   6  30  -5   67.74   30.35
  -6 -30   5  -35.53   96.16
   6 -30  -5   29.30   29.10
   6  30  -4   62.58   25.53
   6 -30  -4   -8.43   41.36
   6  30  -3  483.68  101.75
  -6 -30   3  311.24  141.85
   6 -30  -3  208.06   60.86
   6  30  -2  206.45   55.63
  -6  30   2  244.75   57.72
  -6 -30   2  145.69  102.49
   6 -30  -2  230.41  130.53
   6  30  -1  932.90  205.55
  -6  30   1 1093.63  122.33
  -6 -30   1  515.16  213.26
   6 -30  -1  636.19  180.92
   6  30   0  216.09   68.95
  -6  30   0  223.98   53.58
   6 -30   0  420.40  185.78
   6  30   1  607.12  179.78
  -6  30  -1  718.80  144.52
  -6 -30  -1  347.40  116.04
   6 -30   1 1106.06  186.84
   6  30   2  104.42   30.82
  -6  30  -2  156.11   57.03
   6 -30   2   93.87   84.96
   6  30   3   83.52   38.26
  -6  30  -3  120.86   38.48
   6 -30   3  302.45  118.12
  -6  30  -4  614.30  112.11
   6 -30   4  550.28  204.58
   6  30   5   38.37   33.96
  -6  30  -5  129.93   48.16
   6 -30   5  314.81  154.68
  -6  30  -6  106.48   64.07
   6 -30   6  349.29  164.62
   6  32  -6  195.04   51.49
   6 -32  -6   67.21   25.58
   6  32  -5 1108.34  194.66
  -6 -32   5  873.72  417.36
   6 -32  -5  704.41  196.79
   6  32  -4  910.37  152.74
  -6 -32   4  629.76  171.14
   6 -32  -4  309.88  121.88
   6  32  -3  700.51  227.72
  -6 -32   3  511.41  286.12
   6 -32  -3  649.31  233.70
   6  32  -2    0.48   26.61
  -6  32   2   31.24   21.27
  -6 -32   2  222.50  151.68
   6 -32  -2  154.62  136.16
   6  32  -1 3161.63  488.89
  -6  32   1 3267.26  504.61
  -6 -32   1 1158.94  579.47
   6 -32  -1 2014.55  721.43
   6  32   0   91.82   38.11
  -6  32   0   74.27   29.29
  -6 -32   0   37.41   96.70
   6 -32   0  248.27  124.57
   6  32   1 1097.84  240.08
  -6  32  -1 1438.68  277.55
   6 -32   1 1265.88  295.37
   6  32   2  192.19   88.86
  -6  32  -2  360.30  119.12
   6 -32   2  503.39  141.02
   6  32   3 1128.23  294.32
  -6  32  -3 1201.70  195.42
   6 -32   3  874.66  451.31
   6  32   4   51.16   25.43
  -6  32  -4    2.66   27.77
   6 -32   4  198.19  134.55
  -6  32  -5  363.42   97.55
   6 -32   5  283.07  166.30
   6  34  -5  154.36   64.72
  -6 -34   5  299.88  158.27
   6 -34  -5  136.36   63.30
   6  34  -4  713.21  112.53
  -6 -34   4  382.62  194.86
   6 -34  -4  324.98  154.20
   6  34  -3   55.72   32.96
  -6 -34   3   44.80  111.14
   6 -34  -3  113.41   91.60
   6  34  -2  563.12  127.79
  -6  34   2  213.43   76.92
  -6 -34   2  142.58   72.93
   6 -34  -2  198.24  128.88
   6  34  -1   21.83   28.53
  -6  34   1   16.95   35.12
   6 -34  -1  306.11  131.77
   6  34   0   37.63   27.10
  -6  34   0   33.17   33.67
   6 -34   0  -54.24   87.53
   6  34   1  169.81   58.68
  -6  34  -1  216.20   45.35
   6 -34   1  153.79  107.82
   6  34   2  108.46   29.87
  -6  34  -2  239.17   71.79
   6 -34   2  541.25  205.17
   6  34   3   91.71   36.14
   6 -34   3  247.95  112.51
   6  34   4   80.73   34.08
   6 -34   4  105.26  126.08
   6  36  -3   14.05   21.98
  -6 -36   3  141.77   95.55
   6 -36  -3   92.89   63.09
   6  36  -2  120.29   54.22
  -6 -36   2  173.45   92.25
   6 -36  -2  225.74   66.37
   6  36  -1   58.22   23.43
  -6 -36   1  138.83  103.10
   6 -36  -1  194.92  109.89
   6 -36   0  164.09  136.15
   6  36   1   71.04   35.65
  -6  36  -1   61.39   39.74
   6 -36   1  -51.18   97.84
   6  36   2  162.56   85.20
   7   1 -11   70.84   51.87
   7  -1 -11   73.72   35.69
   7   1 -10   58.61   49.23
   7  -1 -10   65.53   39.16
   7   1  -9  691.09  102.04
   7   1  -9  601.18  105.41
   7  -1  -9  381.98   85.73
   7  -1  -9  816.14  128.17
  -7   1   8  714.94  159.60
   7   1  -8 1104.87  209.28
   7   1  -8 1107.36  262.16
   7  -1  -8 1046.92  192.80
   7  -1  -8 1123.26  221.06
   7   1  -7  231.27   54.50
  -7   1   7  257.07   35.82
   7   1  -7  327.92   51.23
   7  -1  -7  184.61   34.29
  -7  -1   7  181.87   37.16
   7  -1  -7  269.78   64.19
   7   1  -6 6844.78  384.55
  -7   1   6 6633.91  372.66
   7   1  -6 6989.01  402.23
   7  -1  -6 9735.43  547.44
  -7  -1   6 7029.60  395.71
   7  -1  -6 7097.40  407.70
   7   1  -5 1966.50  124.37
   7   1  -5 1629.33   98.86
  -7   1   5 1860.02  110.10
  -7  -1   5 1740.75  105.47
   7  -1  -5 2429.43  169.90
   7  -1  -5 1997.84  152.61
   7   1  -4  302.66   39.52
  -7   1   4  264.75   47.85
   7   1  -4  198.74   32.90
   7  -1  -4  289.38   43.04
  -7  -1   4  252.94   43.89
   7  -1  -4  173.72   33.99
   7   1  -3 2696.08  122.43
  -7   1   3 2483.18  109.04
   7   1  -3 2352.69  111.93
  -7   1   3 2332.06  102.46
   7  -1  -3 2253.46  102.68
  -7  -1   3 2386.02   97.41
   7  -1  -3 2429.93  109.19
   7   1  -2 2766.14  158.78
   7   1  -2 2903.05  124.32
  -7   1   2 2865.34  116.47
  -7   1   2 2757.59  117.21
   7  -1  -2 2791.49  117.51
   7  -1  -2 2293.03  106.91
  -7  -1   2 2958.25  126.48
  -7  -1   2 2912.22  118.43
   7   1  -1  244.68   50.66
  -7   1   1  161.42   28.61
   7   1  -1  224.44   46.30
  -7   1   1  146.21   23.30
   7  -1  -1  212.70   45.29
   7  -1  -1  244.31   56.01
  -7  -1   1  187.72   29.85
  -7  -1   1  251.04   30.48
  -7   1   011936.02  401.32
   7   1   010946.44  358.49
  -7   1   010948.03  359.93
   7  -1   013569.53  485.30
   7  -1   010136.99  333.04
  -7  -1   0 9066.03  299.06
   7   1   1 2873.22  119.16
   7   1   1 2625.78  325.70
  -7   1  -1 1875.87  113.43
  -7   1  -1 1998.56   84.43
  -7  -1  -1 2438.10  114.90
   7  -1   1 2445.30  326.94
  -7  -1  -1 2133.75   88.89
   7  -1   1 2736.21  116.05
   7   1   2   70.74   59.46
  -7   1  -2   23.40   15.23
  -7   1  -2   27.03   12.42
   7   1   2   34.91   14.98
   7  -1   2   10.64   38.29
   7  -1   2   31.89   19.81
  -7  -1  -2    8.92   15.89
  -7  -1  -2   61.75   15.10
   7   1   3 3107.95  218.85
  -7   1  -3 3338.55  132.66
   7   1   3 3500.73  183.03
   7  -1   3 3361.00  159.49
  -7  -1  -3 3287.42  130.04
   7  -1   3 2779.48  243.52
   7   1   4 2322.29  162.93
   7   1   4 2748.76  164.61
  -7   1  -4 2662.85  145.45
   7  -1   4 3074.21  230.99
   7  -1   4 2987.50  181.85
  -7  -1  -4 2595.98  135.21
  -7   1  -5  105.19   39.54
   7   1   5  276.15  127.10
   7   1   5  321.62   72.22
   7  -1   5  112.19   49.07
   7  -1   5  271.60   95.61
  -7  -1  -5   92.43   30.20
   7   1   6 2931.81  318.23
   7   1   6 2419.49  226.43
   7  -1   6 2689.32  241.57
   7  -1   6 2285.35  475.85
  -7  -1  -6 3342.83  282.77
  -7   1  -7  138.63   75.54
   7   1   7  702.54  181.69
   7  -1   7  341.47   97.36
  -7  -1  -7  133.85   62.22
   7  -1   7  160.42   86.32
   7   1   8   62.78   47.98
   7  -1   8   56.96  111.37
   7  -1   8   -4.92   42.07
   7   1   9 1489.94  307.68
  -7   1  -9 1465.24  232.51
  -7   1 -10  428.07   99.88
  -7  -1 -10  214.34  122.59
   7   3 -11   47.47   39.03
   7  -3 -11   50.39   32.25
   7   3 -10 1219.46  335.06
   7  -3 -10 1461.66  235.62
   7   3  -9   28.77   19.34
   7   3  -9   31.60   47.71
   7  -3  -9   60.06   30.45
   7   3  -8 3733.87  354.76
   7   3  -8 4172.04  406.70
   7  -3  -8 4158.67  395.06
   7  -3  -8 3794.99  368.06
   7   3  -7  388.46   84.22
  -7   3   7  423.23   64.81
   7   3  -7  531.12   81.81
   7  -3  -7  318.72   84.56
  -7  -3   7  375.91   63.11
   7  -3  -7  572.03   80.33
   7   3  -6 4760.92  281.00
   7   3  -6 4476.97  254.60
  -7   3   6 4411.05  249.96
   7  -3  -6 4500.59  262.75
   7  -3  -6 4764.86  283.66
   7   3  -5  399.37   87.10
   7   3  -5  332.70   64.74
  -7   3   5  244.96   47.52
  -7  -3   5  231.51   46.07
   7  -3  -5  263.91   48.36
   7  -3  -5  272.88   51.79
   7   3  -4 6394.78  257.57
   7   3  -4 6154.61  246.99
  -7   3   4 6528.83  252.31
  -7  -3   4 6506.13  254.22
   7  -3  -4 5672.21  230.04
   7  -3  -4 6922.59  276.58
   7   3  -3   48.18   28.07
  -7   3   3   -4.13    9.24
   7   3  -3   78.86   38.78
  -7   3   3   21.78   12.53
   7  -3  -3   77.86   35.67
  -7  -3   3   26.45   11.79
   7  -3  -3    4.86   23.83
  -7   3   2 8573.70  328.19
   7   3  -210364.22  427.64
  -7   3   2 8921.33  344.85
   7   3  -2 8937.91  345.93
   7  -3  -212850.00  520.56
  -7  -3   2 9712.80  372.07
   7  -3  -2 9096.19  352.44
   7   3  -1 1547.09  152.01
  -7   3   1 1884.63   84.87
  -7   3   1 1729.15  146.28
   7   3  -1 1526.23  137.71
   7  -3  -1 2231.49  203.03
  -7  -3   1 1369.48  123.12
   7  -3  -1 1538.22  142.50
  -7  -3   1 1471.54  134.12
   7   3   010091.00  330.59
  -7   3   011351.49  382.90
   7   3   0 9949.88  343.39
  -7   3   011983.95  394.18
  -7  -3   010551.45  349.04
   7  -3   010743.08  355.55
   7  -3   012544.63  450.43
  -7  -3   012051.62  395.60
  -7   3  -1 1029.12   97.59
  -7   3  -1  936.14   81.62
   7   3   1  890.72   75.26
   7   3   1  914.91  114.47
   7  -3   1  942.71  113.57
  -7  -3  -1 1334.16  120.67
   7  -3   1 1246.59  157.33
  -7  -3  -1  954.29   82.74
  -7   3  -2 5679.72  222.88
   7   3   2 7202.30  331.83
  -7   3  -2 4477.51  219.06
   7   3   2 4583.77  182.08
   7  -3   2 4707.55  224.93
  -7  -3  -2 5868.96  225.09
  -7   3  -3  971.89  118.20
   7   3   3  816.33  134.44
   7   3   3 1106.17  151.39
   7  -3   3 1033.60  246.63
   7  -3   3  886.92  162.16
  -7  -3  -3  957.25  117.54
   7   3   4 6226.99  330.52
   7   3   4 5653.77  330.85
  -7   3  -4 5411.17  283.27
   7  -3   4 6185.21  388.00
  -7  -3  -4 4381.15  223.74
   7  -3   4 5729.82  323.21
  -7   3  -5   21.12   22.34
   7   3   5   83.34   58.05
   7   3   5   50.07   28.37
   7  -3   5   76.12   80.74
   7  -3   5  -12.92   88.85
  -7  -3  -5   27.97   13.24
  -7   3  -6 5349.26  437.57
   7   3   6 5527.06  757.58
   7   3   6 4952.75  410.00
   7  -3   6 5110.87  474.16
   7  -3   6 5266.41  919.59
  -7  -3  -6 4382.52  354.88
   7   3   7  -69.13   83.75
   7  -3   7  176.62   75.58
   7  -3   7   73.22   34.18
   7   3   8 1617.34  398.04
   7  -3   8 1275.13  195.10
   7   3   9  174.89  121.50
  -7   3  -9   24.74   21.46
  -7   3 -10 1926.27  251.69
  -7  -3 -10 1802.04  230.18
   7   5 -11  442.74  113.60
   7  -5 -11  157.36   52.85
   7   5 -10 1325.42  219.81
   7  -5 -10  849.90  171.95
   7   5  -9  508.63   80.47
   7   5  -9  672.93   98.83
   7  -5  -9  669.13  126.84
   7   5  -8  503.24  107.07
   7  -5  -8  563.15  146.97
   7  -5  -8  181.12   61.11
   7   5  -7 1078.58  137.02
   7   5  -7 1025.31  148.81
  -7   5   7  973.99  127.52
   7  -5  -7 1101.77  211.96
   7  -5  -7  609.98  115.96
   7   5  -6  338.14   62.42
   7   5  -6  400.42   78.91
  -7   5   6  427.00   54.49
   7  -5  -6  496.84  102.93
   7  -5  -6  327.57   58.13
  -7   5   5  412.92   65.39
   7   5  -5  470.50   59.00
   7   5  -5  381.64   59.91
   7  -5  -5  303.75   54.34
   7  -5  -5  379.12   57.33
  -7  -5   5  420.83   54.75
   7   5  -4 2066.85  169.95
   7   5  -4 1694.32  102.53
   7   5  -4 1954.24  123.74
  -7   5   4 1954.80  113.67
   7  -5  -4 2612.13  239.33
   7  -5  -4 1927.41  124.66
  -7  -5   4 1702.57  146.97
  -7   5   3 2093.22  112.68
   7   5  -3 1786.88   99.69
  -7   5   3 1895.53   88.64
   7   5  -3 1728.89   85.26
   7  -5  -3 2362.52  270.37
  -7  -5   3 2055.62  107.57
   7  -5  -3 1997.31   91.03
   7   5  -2  119.70   45.92
  -7   5   2   33.29   22.38
  -7   5   2   52.52   23.35
   7   5  -2   -4.12   16.73
   7  -5  -2  122.23   50.62
  -7  -5   2   11.28   14.80
   7  -5  -2   47.04   18.13
  -7   5   1 1030.53   95.48
   7   5  -1 1298.34  127.36
  -7   5   1 1014.86   97.13
   7   5  -1 1028.49   89.03
   7  -5  -1 1209.69  178.52
  -7  -5   1 1266.43  155.31
   7  -5  -1 1034.38   98.50
  -7   5   0  120.16   24.73
   7   5   0  162.69   44.53
   7   5   0  126.67   26.97
  -7   5   0  103.32   18.60
   7  -5   0  122.07   48.47
  -7  -5   0  122.61   22.28
   7  -5   0  140.66   28.12
  -7   5  -1 1685.38  116.90
   7   5   1 2248.87  183.85
   7   5   1 2315.70   92.19
  -7   5  -1 2285.95   95.16
   7  -5   1 2070.93  133.17
  -7  -5  -1 2167.28  102.68
   7  -5   1 2588.70  148.19
  -7  -5  -1 2573.48  104.50
   7   5   2 1174.98  112.64
  -7   5  -2 2102.99  305.51
   7   5   2 2218.88  148.83
  -7   5  -2 1664.53   71.73
  -7  -5  -2 1822.45  170.77
   7  -5   2 1153.09  114.63
   7  -5   2 1738.44  162.81
  -7  -5  -2 1654.59   72.97
  -7   5  -3 1894.99  114.24
   7   5   3 2839.06  241.93
   7   5   3 1984.08  122.02
   7  -5   3 2467.31  179.59
   7  -5   3 2118.15  187.61
  -7   5  -4    4.94   13.29
   7   5   4  104.96   67.16
   7   5   4   39.66   16.20
   7  -5   4  146.72   69.25
   7  -5   4  224.86   73.98
  -7  -5  -4    8.53    7.13
   7   5   5  -42.48   47.22
  -7   5  -5   32.92   26.04
   7  -5   5  106.70   76.37
   7  -5   5  182.09   90.87
  -7  -5  -5   14.38    5.77
   7   5   6  314.02  137.18
  -7   5  -6  192.16   79.99
   7  -5   6  504.62  165.85
   7  -5   6  423.40   95.08
  -7  -5  -6  258.71   44.02
   7   5   7 1180.29  189.44
   7  -5   7  711.86  209.71
   7  -5   7  495.52  130.90
   7   5   8  993.48  211.63
  -7   5  -8  670.72  135.22
   7  -5   8  720.41  225.54
   7   5   9  112.12   96.43
  -7   5  -9   49.37   39.16
   7  -5   9  160.47   82.71
   7   5  10   36.10   96.54
  -7   5 -10   33.04   46.05
   7   7 -11   98.58   47.03
   7  -7 -11   95.06   35.66
   7   7 -10 2595.38  494.86
   7  -7 -10 1882.25  356.68
   7   7  -9   75.97   26.29
   7   7  -9  175.80   65.02
   7  -7  -9  217.12   40.24
   7   7  -8 1974.07  193.17
   7   7  -8 2124.77  217.99
   7  -7  -8 1969.90  196.98
   7   7  -7 2110.22  236.00
   7   7  -7 2166.36  183.76
  -7   7   7 2113.28  171.39
   7  -7  -7 2293.46  250.34
   7  -7  -7 1522.75  149.94
   7   7  -6 1942.02  127.73
   7   7  -6 2199.74  132.02
  -7   7   6 2012.37  115.56
   7  -7  -6 2169.52  145.88
   7  -7  -6 1581.69  279.68
  -7   7   5  494.92   72.09
   7   7  -5  573.97  110.77
   7   7  -5  583.26  100.36
   7  -7  -5  469.05   72.94
   7  -7  -5  560.46   78.49
  -7  -7   5  414.21   78.91
   7   7  -4 6683.12  380.24
  -7   7   4 7067.62  396.34
   7   7  -4 6701.27  391.20
   7  -7  -4 6939.56  402.88
   7  -7  -4 6746.67  386.62
  -7  -7   4 6137.16  349.33
   7   7  -3 1087.43  245.84
  -7   7   3  927.17   90.62
   7   7  -3 1014.07  116.10
   7   7  -3  987.68   97.92
  -7   7   3  690.31  109.95
   7  -7  -3 1094.29  119.85
   7  -7  -3  836.00  135.33
  -7  -7   3  875.92  126.05
   7   7  -2 8248.02  352.75
  -7   7   2 8937.72  348.50
   7   7  -2 7194.23  281.66
   7   7  -2 8547.51  332.23
  -7   7   2 8217.72  319.40
   7  -7  -2 7835.87  304.85
   7  -7  -2 6455.47  272.52
  -7  -7   2 7904.01  312.65
  -7   7   1 3994.30  180.42
   7   7  -1 5705.26  237.51
  -7   7   1 4698.84  187.94
   7   7  -1 4602.36  181.93
   7  -7  -1 3878.38  185.74
  -7  -7   1 5317.53  210.34
   7  -7  -1 4485.37  179.68
  -7   7   0 4678.55  193.18
   7   7   0 5227.79  225.65
   7   7   0 4754.31  185.04
  -7  -7   0 4716.84  188.71
   7  -7   0 5754.38  284.05
   7  -7   0 5805.93  254.72
   7   7   1 3126.81  262.11
  -7   7  -1 4033.91  195.50
   7   7   1 2938.61  114.70
  -7   7  -1 3167.68  129.07
   7  -7   1 3900.85  285.75
  -7  -7  -1 3124.24  129.80
   7  -7   1 3213.54  142.16
   7   7   2 5880.94  227.28
   7   7   2 5833.26  244.38
   7  -7   210937.30  654.78
   7  -7   2 6061.59  254.97
   7   7   3   48.59   12.34
   7   7   3  168.47   38.02
   7  -7   3  126.37   88.95
   7  -7   3  194.26   63.02
   7   7   4  846.79  215.35
  -7   7  -4 1102.04  133.14
   7  -7   4 1167.50  223.46
   7  -7   4  882.81  143.74
   7   7   5 2707.43  259.26
  -7   7  -5 4095.62  310.51
   7  -7   5 3057.63  349.41
   7  -7   5 3757.98  548.66
   7   7   6 1194.97  170.84
   7  -7   6 1214.93  329.53
   7  -7   6 1233.73  401.61
   7   7   7  196.69  105.06
  -7   7  -7   40.17   27.34
   7  -7   7  110.34   81.87
   7   7   8 2626.67  681.76
  -7   7  -8 3551.00  358.53
   7  -7   8 2398.99  622.30
   7   7   9   60.73   51.31
  -7   7  -9   40.39   39.52
   7   9 -11  180.92   57.84
   7  -9 -11   54.01   25.72
   7   9 -10 1804.28  380.44
   7  -9 -10 1765.07  362.67
   7   9  -9  105.34   42.29
   7  -9  -9   53.62   24.96
   7   9  -8 1281.13  160.69
   7   9  -8 1477.30  251.61
   7  -9  -8 1369.52  247.84
   7   9  -7  381.22   86.36
   7   9  -7  479.31   99.76
   7  -9  -7  355.54   67.98
   7   9  -6 5748.54  435.76
   7   9  -6 5986.92  445.99
  -7   9   6 5377.29  394.93
   7  -9  -6 5691.65  429.57
   7  -9  -6 5337.67  402.08
   7   9  -5  364.01   78.98
   7   9  -5  358.45   68.37
  -7   9   5  324.44   47.88
   7  -9  -5  381.91   74.19
   7  -9  -5  348.94   63.31
   7   9  -412447.61  703.30
  -7   9   412860.26 2652.65
   7   9  -412500.08  702.02
   7  -9  -412851.08 2652.31
   7  -9  -414881.21 3079.70
   7   9  -3  281.98   89.58
  -7   9   3  264.67   39.85
   7   9  -3  224.40   52.07
   7   9  -3  206.76   40.73
  -7  -9   3  117.24   18.42
   7  -9  -3  247.68   64.22
   7  -9  -3  317.47   71.77
   7   9  -2 5924.31  269.73
  -7   9   2 4202.16  173.05
   7   9  -2 5063.15  202.89
   7   9  -2 5032.39  218.35
  -7   9   2 5677.56  228.11
   7  -9  -2 5026.17  202.62
   7  -9  -2 5753.43  334.56
  -7  -9   2 5254.89  209.92
   7   9  -1  179.55   43.80
  -7   9   1  127.54   45.65
   7   9  -1  149.56   32.69
  -7   9   1  165.90   25.81
   7   9  -1  138.23   18.79
   7  -9  -1  139.35   25.38
   7  -9  -1  251.97   93.85
  -7  -9   1  150.08   24.68
   7   9   0 4126.62  198.17
  -7   9   0 5965.39  367.89
   7   9   0 5228.75  253.03
   7   9   0 4435.70  173.02
  -7   9   0 4291.01  173.64
   7  -9   0 5192.46  215.64
   7  -9   0 4934.34  280.39
  -7  -9   0 4518.57  181.32
   7   9   1 3578.86  213.73
  -7   9  -1 4727.07  234.49
   7   9   1 4034.18  196.07
  -7   9  -1 3642.28  154.51
   7   9   1 3505.49  136.32
   7  -9   1 3252.61  145.09
   7  -9   1 4006.76  349.09
  -7  -9  -1 3900.37  165.27
  -7   9  -212441.29  697.59
   7   9   211157.67  637.39
   7   9   212329.34  690.39
   7  -9   216566.69 3425.34
   7  -9   211766.41  794.60
   7   9   3  671.58  151.80
  -7   9  -3  351.06   84.36
   7  -9   3  583.27  117.83
   7  -9   3  678.85  139.02
   7   9   4 4750.59  364.13
   7  -9   4 4135.54  432.64
   7  -9   4 4017.78  385.09
   7   9   5 2069.19  195.37
   7  -9   5 1899.38  454.16
   7  -9   5 2295.37  221.71
   7   9   6 1601.44  245.38
   7  -9   6 2641.79  361.06
   7   9   7  250.27  130.70
  -7   9  -7   65.94   31.09
   7  -9   7  124.65  107.38
   7   9   8 4529.81  717.59
  -7   9  -8 4898.65  489.73
   7  -9   8 4780.83  508.40
   7   9   9  149.96   49.04
  -7   9  -9   73.07   40.70
  -7   9 -10  484.31  283.00
   7  11 -11   52.49   18.25
   7  11 -11  137.49   53.43
   7 -11 -11   78.93   39.27
   7  11 -10  208.52  120.69
   7  11 -10  547.70  138.20
   7 -11 -10  488.32  161.67
   7  11  -9   80.28   31.33
   7  11  -9   40.99   32.88
   7  11  -8   16.03   19.24
   7  11  -8  157.36   63.68
   7 -11  -8  157.00   50.25
   7  11  -7  722.38  123.06
   7  11  -7  704.01  124.25
   7 -11  -7  775.11  161.81
   7  11  -6 1381.08  164.41
   7  11  -6 1243.69  153.59
   7 -11  -6 1425.83  231.68
   7  11  -5  928.61  124.42
   7  11  -5  881.92  124.70
  -7  11   5  654.94   89.08
   7 -11  -5  691.16   89.37
   7 -11  -5  721.24  119.84
   7  11  -4   43.95   20.88
  -7  11   4   20.55   10.27
   7  11  -4   42.28   22.68
   7 -11  -4   16.67   19.55
   7 -11  -4   54.19   24.66
   7  11  -3  156.26   38.64
  -7  11   3   95.54   24.36
   7  11  -3  101.64   35.92
   7  11  -3  120.92   30.88
   7 -11  -3   48.77   37.83
   7 -11  -3   88.76   29.16
   7  11  -2   44.53   21.94
  -7  11   2   15.40   13.83
   7  11  -2   55.17   26.09
   7  11  -2   70.28   28.05
   7 -11  -2  114.56   59.07
   7 -11  -2   53.08   16.13
   7  11  -1 5137.56  204.97
   7  11  -1 4466.90  182.69
   7  11  -1 5064.86  447.78
   7 -11  -1 6949.75  292.57
   7 -11  -1 5836.21  642.71
   7  11   0 1523.33  182.19
  -7  11   0  954.51  112.29
   7  11   0 1062.66  102.98
   7  11   0  989.25  104.88
  -7  11   0  983.63  113.08
   7 -11   0  965.56  181.38
   7 -11   0 1215.47  168.05
   7  11   1    9.23   23.98
  -7  11  -1   22.30   27.90
   7  11   1   40.02   10.11
   7  11   1   24.37   16.16
  -7  11  -1   34.28   14.52
   7 -11   1  164.28   78.05
   7 -11   1   81.68   41.57
  -7  11  -2   32.24   17.47
   7  11   2  129.86   50.60
   7  11   2   48.58    8.82
   7 -11   2   40.13   36.23
   7 -11   2  146.15   42.78
   7  11   3  214.50   67.56
   7 -11   3  336.52   97.15
   7 -11   3  314.34  114.64
   7  11   4  -49.85   54.93
   7 -11   4  178.85  108.80
   7 -11   4  108.04   52.80
   7  11   5 3493.89  404.16
  -7  11  -5 3710.28  309.25
   7 -11   5 3815.50  360.75
   7  11   6 2789.99  416.74
  -7  11  -6 3283.67  319.16
   7 -11   6 3526.49  394.33
   7  11   7  196.83   87.03
  -7  11  -7  289.80   43.34
   7 -11   7  248.47  148.39
  -7  11  -8   43.07   31.70
   7 -11   8   87.75   93.45
   7  11   9  323.92  101.22
  -7  11  -9  153.57   47.08
   7 -11   9  174.12   67.14
   7  11  10  -40.23  103.30
  -7  11 -10  132.40   70.05
   7 -11  10   99.69   64.65
   7  13 -10  201.22  149.39
   7 -13 -10  525.78  136.56
   7  13  -9  601.68  107.90
   7  13  -9  527.56  189.63
   7 -13  -9  691.33  153.11
   7  13  -8 1952.63  217.95
   7  13  -8 1946.40  229.41
   7 -13  -8 1908.34  217.20
   7  13  -7  501.47  154.82
   7 -13  -7  382.35  103.18
   7  13  -6 1880.18  163.16
   7 -13  -6 1797.61  239.45
   7  13  -5  616.33  115.93
  -7  13   5  454.86   75.74
  -7  13   5  636.82   98.56
   7 -13  -5  594.43  114.65
  -7  13   4 3815.47  214.90
   7  13  -4 4485.01  259.22
   7 -13  -4 3833.03  224.76
   7  13  -3 2314.69  129.83
  -7  13   3 2109.06  120.98
   7  13  -3 2099.72  157.30
   7 -13  -3 1746.62  328.97
   7 -13  -3 2392.26  189.29
   7  13  -2 1917.36  120.00
  -7  13   2 1384.04  296.71
   7  13  -2 1800.97  138.14
   7 -13  -2 1367.48  363.66
   7 -13  -2 1610.48  109.85
   7  13  -1 1884.05  123.54
   7  13  -1 1915.00  118.88
   7  13  -1 2079.29  153.26
   7 -13  -1 2711.19  246.46
   7 -13  -1 1722.55  373.53
   7  13   0 7380.38  419.82
  -7  13   0 9124.94  535.48
   7  13   0 7980.81  463.17
   7  13   0 8708.35  489.09
   7 -13   0 8027.70  611.93
   7 -13   0 8361.84  483.79
   7  13   1 1381.34  286.30
   7  13   1 1719.97  174.20
   7  13   1 1204.47  152.25
   7 -13   1 1010.95  133.46
   7 -13   1  847.36  248.27
   7  13   2 7614.25  404.58
   7 -13   2 7253.08  441.06
   7 -13   210287.54  569.09
   7  13   3 5658.76  357.67
   7 -13   3 6012.97  407.05
   7 -13   3 6347.99  401.78
   7  13   4 2077.15  362.85
  -7  13  -4 1413.63  225.31
   7 -13   4 1255.91  260.98
   7  13   5   40.76   38.31
  -7  13  -5   79.51   37.18
   7 -13   5  -53.45   81.62
   7  13   6 1069.34  254.73
  -7  13  -6 1379.68  147.60
   7 -13   6  745.89  253.62
   7  13   7 2009.59  357.43
  -7  13  -7 2449.31  277.54
   7 -13   7 2722.55  365.96
  -7  13  -8 1827.40  323.93
   7 -13   8 1686.60  300.62
  -7  13  -9  610.00  182.84
   7 -13   9  449.47  183.55
   7  15 -10  561.17  168.34
   7  15 -10 1099.41  163.06
   7 -15 -10  923.90  126.53
   7  15  -9   89.37   41.53
   7 -15  -9  106.18   30.70
   7  15  -8 1936.85  200.36
   7 -15  -8 1871.28  261.56
   7  15  -7  335.92   62.20
   7 -15  -7  231.92   60.10
   7  15  -6 2033.77  248.11
   7 -15  -6 2171.79  317.39
   7  15  -5   27.82   24.03
  -7  15   5    0.90    2.67
  -7  15   5   19.40    7.33
   7 -15  -5   53.38   18.95
  -7  15   4  982.24  148.45
   7  15  -4  997.82  184.47
  -7  15   4  845.88  103.78
   7 -15  -4  956.03  151.13
  -7  15   3  237.62   59.65
   7  15  -3  603.17  116.58
  -7  15   3  377.55   57.70
   7 -15  -3  463.30   91.01
  -7  15   2 9533.82  504.44
   7  15  -2 6962.80  372.39
  -7  15   2 6998.16  363.34
   7  15  -2 6952.62  386.80
   7 -15  -2 9088.36  485.51
  -7  15   1   37.14   35.00
   7  15  -1  115.49   33.32
  -7  15   1   97.79   28.22
   7  15  -1   -1.85   33.12
   7 -15  -1  206.39   59.52
   7  15   0 4351.41  231.11
  -7  15   0 4924.83  259.25
   7  15   0 5177.73  288.24
   7  15   0 4624.44  239.77
   7 -15   0 4600.21  252.39
   7  15   1  138.54   45.84
  -7  15  -1   53.91   27.32
   7  15   1   -3.33    9.94
   7  15   1   42.73   12.86
   7 -15   1   28.07   24.23
   7  15   2 1521.51  259.34
  -7  15  -2 1382.09  167.57
   7 -15   2 1569.83  372.70
   7  15   3  -51.57   28.74
  -7  15  -3   18.26   28.97
   7 -15   3  102.89   74.13
   7  15   4 4552.48  429.27
  -7  15  -4 6189.18  518.31
   7 -15   4 5252.50  465.79
   7  15   5  784.09  178.75
  -7  15  -5  662.43  165.33
   7 -15   5  306.12  104.98
   7  15   6 2244.80  481.84
  -7  15  -6 2223.84  364.53
   7 -15   6 1845.54  489.80
   7  15   7  202.07   82.92
  -7  15  -7  237.92   71.34
   7  15   8   -9.74   78.42
  -7  15  -8  218.43   84.84
   7 -15   8  715.40  189.66
  -7  15  -9   -8.64   37.84
   7 -15   9  -16.56  108.28
   7  17 -10   22.22   26.60
   7  17 -10   43.91   42.34
   7 -17 -10   86.71   32.63
   7  17  -9 1428.66  274.33
   7 -17  -9 1316.39  294.30
   7  17  -8   36.82   23.95
   7 -17  -8   32.24   27.29
   7  17  -7  294.03  100.18
   7 -17  -7  356.04   81.46
   7  17  -6  168.36   74.34
   7 -17  -6  180.71   51.28
   7  17  -5 1902.35  163.80
  -7  17   5 1792.13  144.92
   7 -17  -5 1530.48  134.28
  -7  17   4   13.39   11.66
   7  17  -4   63.32   29.48
  -7  17   4   22.23   16.03
   7 -17  -4   18.24   16.17
  -7  17   3 6344.71  360.99
   7  17  -3 9088.50  512.57
  -7  17   3 8994.36  502.99
   7 -17  -311920.94 1759.08
  -7  17   2  398.10   73.19
   7  17  -2  726.09  103.58
  -7  17   2  601.43   85.35
   7  17  -2  544.20  123.73
   7 -17  -2  564.18   93.44
  -7  17   1  433.41   97.96
   7  17  -1  546.99  100.66
  -7  17   1  515.17   81.95
   7  17  -1  565.04   87.00
   7 -17  -1  528.39  109.72
   7  17   0  756.17  150.42
  -7  17   0  670.22  111.17
   7  17   0  739.88  136.91
   7 -17   0  398.63  102.96
   7  17   1 4071.20  247.36
  -7  17  -1 3413.32  202.70
   7  17   1 2813.37  161.97
   7  17   1 3095.11  192.47
   7 -17   1 3804.31  499.78
   7  17   2  101.59   50.04
  -7  17  -2   88.88   33.02
   7 -17   2  177.09  114.26
   7  17   3 1450.88  259.62
  -7  17  -3 1706.60  139.90
   7 -17   3 1575.95  180.26
   7  17   4  149.20   54.69
  -7  17  -4  270.02   73.67
   7 -17   4  168.57   76.17
   7  17   5 2007.30  338.80
  -7  17  -5 1644.82  264.17
   7 -17   5 1494.42  223.95
   7  17   6   84.66   64.93
  -7  17  -6  100.32   50.23
   7 -17   6  155.35   98.44
   7  17   7  464.01   99.78
  -7  17  -7  579.66  144.59
   7 -17   7  766.97  147.82
   7  17   8  -38.71   54.19
  -7  17  -8   95.04   41.79
   7 -17   8   98.38   62.75
   7  17   9  373.26  144.94
  -7  17  -9  408.64  141.97
   7 -17   9  480.38  215.84
   7  19 -10  251.52   39.29
   7 -19 -10  186.46   43.15
   7  19  -9  106.55   25.36
   7 -19  -9    4.20   23.97
   7  19  -8 1322.50  216.46
   7 -19  -8 1304.68  233.53
   7  19  -7 1377.13  158.33
   7 -19  -7 1281.64  161.42
   7  19  -6 1869.77  306.46
   7 -19  -6 1894.94  343.70
   7  19  -5  890.93  151.10
  -7  19   5  590.89   96.37
   7 -19  -5  606.38  136.70
  -7  19   4  900.46  122.94
   7  19  -4 1466.51   56.40
  -7  19   4 1341.10  171.20
   7 -19  -4 1828.07  170.01
  -7  19   3 4727.13  482.87
   7  19  -3 4333.33  328.02
  -7  19   3 4434.01  330.24
   7 -19  -3 5141.13  400.83
  -7  19   2 3947.22  401.29
   7  19  -2 4080.25  308.36
  -7  19   2 4693.36  350.40
   7 -19  -2 5554.16  438.52
   7  19  -1 4346.68  328.67
  -7  19   1 4717.25  353.53
   7 -19  -1 3765.72  295.74
   7  19   0 4529.73  343.42
  -7  19   0 4980.19  388.28
   7  19   0 4107.27  349.27
   7 -19   0 3287.33  261.78
   7  19   1 1018.74  173.07
  -7  19  -1 1532.43  169.78
   7  19   1 1078.57  159.99
   7  19   1 1369.83  210.49
   7 -19   1 1896.05  345.51
   7  19   2 2629.08  311.91
  -7  19  -2 2158.35  209.26
   7 -19   2 2373.59  243.52
   7  19   3  116.84   52.18
  -7  19  -3  125.33   31.18
   7 -19   3   23.92   72.12
   7  19   4 1338.90  215.17
  -7  19  -4 1866.50  189.67
   7 -19   4 1536.60  391.52
   7  19   5 5602.05  407.01
   7 -19   5 4769.58  805.09
   7  19   6 1144.14  231.72
  -7  19  -6 1139.27  130.41
   7 -19   6  832.59  225.50
   7  19   7  257.68   86.32
  -7  19  -7  151.30   48.49
   7 -19   7  273.54  142.07
   7  19   8  531.34  194.33
  -7  19  -8  483.92  229.58
   7 -19   8  879.27  229.52
   7  21  -9  107.55   36.18
   7 -21  -9   87.49   33.60
   7  21  -8  543.20  149.23
   7 -21  -8  727.16  146.81
   7  21  -7   15.56   26.62
   7 -21  -7   68.02   23.80
   7  21  -6 1540.22  243.19
   7 -21  -6 1643.95  283.81
   7  21  -5  288.67   52.36
   7 -21  -5  326.36   81.34
  -7  21   4 1590.33  212.01
   7  21  -4 2562.37  312.07
  -7  21   4 2451.74  293.24
   7 -21  -4 3553.46  482.26
   7  21  -3  351.76   71.65
  -7  21   3  193.02   32.27
   7 -21  -3  172.06   50.29
   7  21  -2   76.57   24.36
  -7  21   2   53.24   28.24
   7 -21  -2   93.81   36.96
   7  21  -1  606.35  107.98
  -7  21   1  682.28  143.84
   7 -21  -1  603.56  110.40
   7  21   0  478.35   99.42
  -7  21   0  756.75  132.18
   7  21   0  293.11   79.44
   7 -21   0  326.75   66.52
   7  21   1   12.60   13.72
  -7  21  -1   18.17   27.10
   7  21   1   26.68    7.13
   7 -21   1   52.08   78.64
   7  21   2 3662.22  499.49
  -7  21  -2 2900.04  351.80
   7  21   2 2606.49  309.57
   7  21   2 2184.32  259.69
   7 -21   2 2748.81  659.15
   7  21   3  404.10   49.22
  -7  21  -3  347.24  113.29
   7 -21   3  419.46  130.68
   7  21   4   48.45   41.99
  -7  21  -4   72.70   20.75
   7 -21   4   58.69   79.57
   7  21   5  206.60   51.13
  -7  21  -5  346.13   55.69
   7 -21   5  311.95  169.71
   7  21   6   99.07   45.99
  -7  21  -6   57.20   42.57
   7 -21   6  310.71  132.32
   7  21   7   14.47   39.72
  -7  21  -7   50.36   28.35
   7 -21   7  190.32  122.57
   7  21   8  273.09  108.98
  -7  21  -8  456.32  141.58
   7 -21   8  330.71  152.13
   7  23  -9  293.28  100.83
   7 -23  -9  211.54   52.27
   7  23  -8   64.90   29.12
   7 -23  -8   56.11   23.97
   7  23  -7 2237.63  349.39
   7 -23  -7 1988.79  375.09
   7  23  -6  292.80   93.51
   7 -23  -6  339.69   83.63
   7  23  -5 1578.31  183.44
   7 -23  -5 1739.58  326.76
   7  23  -4  474.85  134.41
  -7  23   4  452.56   74.56
   7 -23  -4  417.02   96.33
   7  23  -3  107.24   42.42
   7 -23  -3  160.02   63.76
   7  23  -2 1009.68   50.10
  -7  23   2 1131.50  162.08
   7 -23  -2  681.78  196.63
   7  23  -1 4186.73  502.93
  -7  23   1 4312.81  516.46
   7 -23  -1 2689.29  335.84
   7  23   0 1221.86  156.20
  -7  23   0 1230.55  165.12
   7 -23   0 1324.58  340.02
   7  23   1  746.40  187.89
  -7  23  -1  966.25  206.99
   7  23   1  299.00  110.34
   7 -23   1  839.98  209.49
   7  23   2   21.00   21.32
  -7  23  -2   17.28   29.96
   7  23   2    2.82    4.06
   7 -23   2   71.94   64.73
   7  23   3  551.96  108.00
  -7  23  -3  471.11   90.86
   7 -23   3  518.44  105.21
   7  23   4  267.54   56.76
  -7  23  -4  465.55   96.25
   7 -23   4  337.05  107.76
   7  23   5  719.99  227.55
  -7  23  -5 1032.30  284.50
   7 -23   5 1356.77  230.09
   7  23   6  110.78   65.55
  -7  23  -6  104.16   41.87
   7 -23   6   57.37  118.41
  -7  23  -7  501.84  115.28
   7 -23   7  293.62  173.76
   7  25  -8  226.01   91.34
   7 -25  -8  266.19   95.04
   7  25  -7   63.19   37.64
   7 -25  -7  -16.42   41.12
   7  25  -6 1406.16  227.27
   7 -25  -6 1856.10  354.73
   7  25  -5  574.85  117.02
   7 -25  -5  492.97  151.34
   7  25  -4 2552.08  286.00
  -7  25   4 2460.80  270.10
   7 -25  -4 2153.41  398.51
   7  25  -3 2547.45  414.98
  -7 -25   3 2547.08  448.36
   7 -25  -3 1557.96  395.59
   7  25  -2 1465.68  269.08
  -7  25   2 1600.05  295.67
  -7 -25   2 1630.49  309.57
   7 -25  -2 1037.71  247.59
   7  25  -1 2045.71  205.04
  -7  25   1 2072.21  204.73
   7 -25  -1  918.10  250.15
   7  25   0 1316.14  140.40
  -7  25   0 1471.76  148.51
   7 -25   0 2059.21  283.81
   7  25   1  349.22   87.23
  -7  25  -1  519.24  109.94
   7 -25   1  529.88  145.71
   7  25   2 4870.26  789.49
  -7  25  -2 3783.87  612.25
   7  25   3 1231.42  220.64
  -7  25  -3 1192.68  185.50
   7 -25   3 1213.20  207.66
   7  25   4  610.28  208.04
  -7  25  -4  584.86  155.06
   7 -25   4 1066.37  268.46
   7  25   5   99.08   50.85
  -7  25  -5  276.38   72.43
   7 -25   5  371.09  134.02
   7  25   6  378.28  107.67
  -7  25  -6  452.03  147.45
   7 -25   6  355.43  205.08
  -7  25  -7  403.19   62.43
   7 -25   7  452.65  191.42
   7  27  -7  175.26   53.70
   7 -27  -7  264.88   79.28
   7  27  -6  462.34  199.97
   7 -27  -6  471.08  156.98
   7  27  -5  -13.67   27.41
   7 -27  -5   -5.14   40.64
   7  27  -4  396.20  138.41
  -7 -27   4  410.76  130.03
   7 -27  -4  410.44  110.10
   7  27  -3  548.50   82.23
  -7  27   3  620.28   85.67
  -7 -27   3  672.93  148.38
   7 -27  -3  343.31   83.20
   7  27  -2  249.72   72.01
  -7  27   2  184.98   27.86
  -7 -27   2  102.93   69.01
   7 -27  -2  193.78   47.49
   7  27  -1  239.94   52.68
  -7  27   1  247.02   35.29
  -7 -27   1  233.79  109.59
   7 -27  -1   98.38   58.52
   7  27   0  714.17  161.07
  -7  27   0  837.55  192.98
  -7 -27   0  323.05   76.84
   7 -27   0  849.20  257.41
   7  27   1  -16.89   21.90
  -7  27  -1  -15.82   29.70
   7 -27   1  124.00   61.31
   7  27   2  162.64   59.57
  -7  27  -2  167.60   38.52
   7 -27   2  173.30  109.40
   7  27   3   58.86   23.29
  -7  27  -3   65.25   35.34
   7 -27   3  379.76  179.98
   7  27   4  146.45   60.25
  -7  27  -4  399.67   94.84
   7 -27   4  206.79  123.20
   7  27   5  234.36   62.99
   7 -27   5  606.81  228.22
   7  27   6  142.34   68.50
  -7  27  -6  284.43  102.68
   7 -27   6  145.09  169.61
   7  29  -7  159.07  117.93
   7 -29  -7  463.45  152.78
   7  29  -6   12.11   27.77
   7 -29  -6   99.89   53.30
   7  29  -5 1153.25  186.22
   7 -29  -5  664.72  192.54
   7  29  -4  394.69  144.00
  -7 -29   4  180.18   95.65
   7 -29  -4  368.82  114.92
   7  29  -3 1937.81  305.56
  -7  29   3 1887.09  293.31
  -7 -29   3 2061.42  382.42
   7 -29  -3  986.82  246.09
   7  29  -2  255.36   72.34
  -7  29   2  317.89   61.34
   7 -29  -2  190.32   98.53
   7  29  -1 1922.51  219.27
  -7  29   1 1892.62  195.19
  -7 -29   1 1815.49  253.11
   7 -29  -1 2107.15  261.08
   7  29   0  478.13  156.67
  -7  29   0  444.69   93.49
  -7 -29   0  310.82  106.60
   7 -29   0  559.60  163.96
   7  29   1 1650.89  233.59
  -7  29  -1 2009.16  207.41
   7 -29   1 1906.00  291.90
   7  29   2 1125.99  270.03
  -7  29  -2  646.73  169.42
   7 -29   2  801.81  206.99
   7  29   3 2279.91  435.32
   7 -29   3 1256.40  438.52
   7  29   4   39.49   14.84
  -7  29  -4   63.86   24.60
   7 -29   4  233.74   93.94
   7  29   5  160.75   57.27
  -7  29  -5  135.59   48.34
   7 -29   5  615.69  185.65
   7  31  -6  800.49  137.26
   7 -31  -6  307.85   90.51
   7  31  -5  602.35  178.13
   7 -31  -5  385.98  121.68
   7  31  -4   76.96   36.25
  -7 -31   4  137.18   88.41
   7 -31  -4  108.45   55.65
   7  31  -3  769.45  132.46
  -7 -31   3  679.83  205.43
   7 -31  -3  485.96  101.07
   7  31  -2  772.91   67.12
  -7  31   2  618.65  165.81
   7 -31  -2  726.33  246.04
   7  31  -1  249.08   73.03
  -7  31   1  117.46   28.90
   7 -31  -1  137.51  110.12
   7  31   0 2017.83  385.41
  -7  31   0 1738.31  368.37
   7 -31   0 1314.49  442.86
   7  31   1  648.19  137.88
  -7  31  -1  848.84  166.86
   7 -31   1  535.77  168.55
   7  31   2  228.73   69.88
  -7  31  -2  520.55   92.86
   7 -31   2  375.76  184.23
   7  31   3  274.78  109.67
  -7  31  -3  199.38   41.46
   7 -31   3  306.18  145.35
  -7  31  -4 1661.57  217.49
   7 -31   4  834.85  322.79
   7  31   5   -2.56   30.54
  -7  31  -5   93.43   48.72
   7 -31   5  157.06  183.17
   7  33  -4   23.01   20.03
  -7 -33   4   50.57   90.04
   7 -33  -4   91.85   38.06
   7  33  -3 1048.27  166.62
  -7 -33   3  965.16  193.56
   7 -33  -3  566.29  151.17
   7  33  -2  134.82   37.55
  -7 -33   2   -2.56   83.00
   7 -33  -2  278.83  137.00
   7  33  -1   12.90   29.24
  -7  33   1   48.01   31.46
  -7 -33   1  120.21   90.33
   7 -33  -1  128.31   83.26
   7  33   0   38.49   22.97
  -7  33   0   32.44   28.52
   7 -33   0  -40.10  105.35
   7  33   1  289.58  164.23
  -7  33  -1  372.44  158.58
   7 -33   1  594.03  151.01
   7  33   2  177.55   90.85
  -7  33  -2  388.38   98.17
   7  33   3  139.60   77.37
   7 -33   3  201.88  112.49
   7  35  -3  865.05  197.90
  -7 -35   3  905.48  233.89
   7 -35  -3 1176.10  256.84
   7  35  -2  215.23  130.07
  -7 -35   2  -35.13   72.12
   7 -35  -2   42.77  126.81
   7  35  -1  715.13  223.64
   7 -35  -1  527.85  137.52
   7  35   0   49.80   28.49
  -7  35   0   38.40   32.25
   7 -35   0   11.03  100.15
   7  35   1 1339.69  259.14
  -7  35  -1 1645.24  312.09
   7 -35   1  579.86  385.05
   8   0 -11   89.28   26.07
   8   0 -10 1725.57  332.28
   8   0  -9   34.79   32.40
   8   0  -8 1185.89  151.61
   8   0  -8 1549.63  257.24
   8   0  -7   35.12   20.79
  -8   0   7   57.19   22.45
   8   0  -7   31.03   34.30
   8   0  -6  158.75   43.21
  -8   0   6   87.72   30.19
   8   0  -6   71.57   28.90
   8   0  -5   43.93   29.28
  -8   0   5   18.97   11.97
   8   0  -5   42.28   28.43
   8   0  -4 7446.07  432.14
  -8   0   4 7353.32  415.08
   8   0  -4 7295.72  416.36
   8   0  -3   46.19   27.34
   8   0  -3   26.73   24.44
  -8   0   3   43.62   27.02
   8   0  -2 9130.31  371.65
  -8   0   2 9557.14  368.80
   8   0  -212156.85  469.83
  -8   0   211299.92  439.36
   8   0  -1   87.71   48.67
  -8   0   1   19.14   15.49
   8   0  -1   62.18   28.08
  -8   0   1  -17.28   18.89
   8   0   0   69.08   59.96
  -8   0   0   44.89   28.10
   8   0   0   71.23   15.22
  -8   0   0   21.17   14.89
   8   0   1   38.85   62.15
  -8   0  -1    8.70   24.12
   8   0   1   40.38   14.29
  -8   0  -1   47.67   21.89
   8   0   2 6438.20  554.06
   8   0   2 4347.70  251.71
  -8   0  -2 5901.94  338.41
   8   0   3   61.18   33.39
   8   0   3  101.24   48.03
  -8   0  -3    6.46   10.44
   8   0   4 1442.51  204.20
   8   0   4 1680.30  131.00
  -8   0  -4 1397.79  164.91
   8   0   5  227.70  112.52
   8   0   5  123.82   52.07
  -8   0  -5   24.82   12.51
   8   0   6  210.58   87.59
   8   0   6  477.97  108.27
  -8   0  -6   79.84   41.72
   8   0   7  182.35   60.71
   8   0   7   69.65   49.97
   8   0   8   81.17   63.95
   8   0   9  -25.61  100.95
  -8   0 -10  314.99  199.87
   8   2 -11   20.51   39.88
   8  -2 -11  109.02   40.46
   8   2 -10  743.56  141.14
   8  -2 -10  581.78  117.29
   8   2  -9   64.46   33.66
   8  -2  -9  150.45   51.18
   8   2  -8   44.15   21.35
   8   2  -8   44.88   15.41
   8  -2  -8   13.00   11.77
   8  -2  -8    7.66   28.64
   8   2  -7 3554.48  426.12
  -8   2   7 3451.33  412.04
   8   2  -7 3776.48  457.09
   8  -2  -7 4065.21  492.09
   8   2  -6 4088.16  310.96
   8   2  -6 3821.18  285.31
  -8   2   6 4049.96  301.46
  -8  -2   6 4247.37  317.56
   8  -2  -6 4423.10  338.20
   8  -2  -6 4202.55  326.98
   8   2  -5  469.63  158.12
   8   2  -5  672.22  124.31
  -8  -2   5  408.19   81.70
   8  -2  -5  513.33   92.66
   8  -2  -5  449.57   78.80
   8   2  -4 3089.46  193.99
   8   2  -4 2615.95  171.81
  -8   2   4 2545.13  147.66
  -8  -2   4 2354.09  138.99
   8  -2  -4 2621.08  159.98
   8  -2  -4 2454.66  176.48
   8   2  -3   77.87   26.97
  -8   2   3   21.09   10.62
   8   2  -3   58.75   32.59
  -8   2   3   56.39   21.98
   8  -2  -3  -27.66   24.52
  -8  -2   3   45.68   17.30
   8  -2  -3   29.48   33.43
  -8   2   2 3580.41  145.04
   8   2  -2 3246.38  155.34
  -8   2   2 3908.17  163.50
   8   2  -2 3806.22  156.69
   8  -2  -2 5322.58  247.47
  -8  -2   2 3675.81  158.49
   8  -2  -2 3785.49  156.82
  -8  -2   2 3758.63  159.25
   8   2  -1 4535.17  200.61
   8   2  -1 5709.07  225.06
  -8   2   1 5510.29  219.40
   8  -2  -1 6629.23  394.34
  -8  -2   1 5615.58  222.49
   8  -2  -1 5606.14  225.61
  -8  -2   1 5733.14  234.82
   8   2   0 2589.94  106.45
  -8   2   0 3182.20  180.87
   8   2   0 1999.60  140.35
  -8   2   0 2799.95  117.31
  -8  -2   0 2353.21  100.81
   8  -2   0 2552.07  106.74
   8  -2   0 2821.41  187.65
  -8  -2   0 3028.95  128.23
   8   2   1  336.22   35.42
   8   2   1  687.31  143.54
  -8   2  -1  353.35   78.22
  -8   2  -1  425.39   71.42
   8  -2   1  580.46  100.11
  -8  -2  -1  360.09   53.76
   8  -2   1  600.60  105.86
   8   2   2 6336.64  515.72
   8   2   2 4223.70  252.66
  -8   2  -2 4915.85  279.62
   8  -2   2 4984.33  448.03
   8  -2   2 3449.68  216.40
  -8  -2  -2 4742.44  268.93
   8   2   3   78.14   87.76
   8   2   3  450.67   96.84
  -8   2  -3  236.95   49.98
   8  -2   3  206.21   80.31
   8  -2   3  145.60   53.82
  -8  -2  -3  288.13   43.14
   8   2   4 1811.88  133.19
   8   2   4 1325.46  214.59
  -8   2  -4 1321.35  157.84
   8  -2   4 1849.58  255.49
  -8  -2  -4 1360.96  162.39
   8  -2   4 1557.96  320.31
   8   2   5 1398.04  277.21
   8   2   5  852.53  198.77
  -8   2  -5  974.02  117.16
   8  -2   5 1288.51  267.74
   8  -2   5 1130.33  151.29
  -8  -2  -5 1052.00  120.70
   8   2   6 1015.77  223.26
   8   2   6 1147.87  198.70
  -8   2  -6 1433.58  176.23
   8  -2   6  889.27  224.44
   8  -2   6 1212.72  344.74
  -8  -2  -6 1003.08   48.20
   8   2   7  101.25   56.38
   8   2   7   47.36   30.83
   8  -2   7 -108.64  101.62
   8  -2   7   41.49   25.37
   8   2   8  341.38  107.68
   8  -2   8  422.61  142.25
   8  -2   8  278.86   99.51
   8   2   9  -24.28  112.79
  -8   2  -9   40.39   30.94
  -8   2 -10  139.09   47.25
  -8  -2 -10  251.49   46.38
   8   4 -11   22.29   25.07
   8  -4 -11   58.82   23.22
   8   4 -10 2586.97  492.71
   8  -4 -10 2564.66  485.73
   8   4  -9   45.65   20.43
   8   4  -9   37.26   35.36
   8  -4  -9   -6.90   31.15
   8   4  -8 1875.84  309.59
   8   4  -8 2418.89  390.78
   8  -4  -8 1640.96  270.35
   8  -4  -8 2329.85  384.05
  -8   4   7   19.94    8.24
   8   4  -7   40.08   19.17
   8   4  -7   27.15   33.40
   8  -4  -7   10.88   12.13
   8  -4  -7    7.95   23.15
   8   4  -6 2848.15  222.81
   8   4  -6 2619.78  198.83
   8  -4  -6 2068.32  171.42
   8  -4  -6 2604.40  202.65
   8   4  -5 1589.37  240.06
  -8   4   5 1425.33  170.37
   8   4  -5 1500.85  181.95
   8  -4  -5 1144.52  165.18
  -8  -4   5 1479.98  176.32
   8  -4  -5 1551.29  187.40
   8   4  -4 7185.32  380.56
   8   4  -4 6266.46  336.72
  -8  -4   4 7504.12  385.08
   8  -4  -4 7286.51  389.33
   8  -4  -4 5329.95  300.04
  -8   4   3   34.91   15.56
   8   4  -3   66.90   45.27
   8   4  -3   37.52   22.29
   8  -4  -3   55.57   28.61
   8  -4  -3   44.44   20.41
  -8  -4   3   56.35   22.61
  -8   4   2 3197.44  131.99
   8   4  -2 3879.14  195.14
  -8   4   2 3482.32  146.57
   8   4  -2 3620.55  166.35
   8  -4  -2 4289.42  352.82
  -8  -4   2 4002.45  162.99
   8  -4  -2 3893.95  161.22
   8   4  -1  -22.99   29.30
  -8   4   1   31.05   25.63
  -8   4   1   22.22   14.19
   8   4  -1   33.48   24.11
   8  -4  -1   78.15   31.68
  -8  -4   1   16.54    8.70
   8  -4  -1   24.09   15.97
   8   4   0 4717.01  206.81
  -8   4   0 5300.75  223.95
   8   4   0 5417.97  211.91
  -8   4   0 5525.41  219.83
   8  -4   0 5486.92  464.39
   8  -4   0 4891.31  199.20
  -8  -4   0 5450.14  218.93
  -8   4  -1 2169.56   92.88
   8   4   1 1709.02  166.04
   8   4   1 2064.46   88.49
   8  -4   1 2297.80  109.31
   8  -4   1 2205.62  364.49
  -8  -4  -1 2226.59   94.16
   8   4   2 3735.79  216.25
   8   4   2 4402.82  543.45
   8  -4   2 3294.89  225.32
   8  -4   2 2888.48  173.87
  -8  -4  -2 3398.84  193.45
  -8   4  -3  107.19   44.74
   8   4   3  170.14   66.81
   8   4   3  207.20   58.50
   8  -4   3  416.32   75.96
   8  -4   3  403.58  110.12
  -8  -4  -3  111.10   29.56
  -8   4  -4 1943.85  115.93
   8   4   4 2123.89  172.05
   8   4   4 1904.03  138.31
   8  -4   4 2358.71  169.91
   8  -4   4 2412.59  238.32
  -8  -4  -4 2089.96  119.70
  -8   4  -5   31.71   19.66
   8   4   5  207.96   46.74
   8   4   5  124.10   29.80
   8  -4   5  224.52   93.19
   8  -4   5  -74.44   83.87
  -8  -4  -5   21.38    9.02
   8   4   6 1604.69  234.94
  -8   4  -6 1317.19  132.75
   8  -4   6 1003.76  326.54
   8  -4   6 1185.42  108.92
  -8  -4  -6 1021.49  187.08
   8   4   7 1338.90  327.93
   8  -4   7  834.37  286.88
   8  -4   7 1302.98  200.19
   8   4   8 1704.28  471.50
   8  -4   8 1575.79  311.22
   8  -4   8  829.81  357.68
   8   4   9  212.41  109.20
  -8   4  -9  120.08   58.99
   8   6 -11  156.70   67.23
   8  -6 -11  185.08   55.51
   8   6 -10 1098.13  222.30
   8  -6 -10 1021.84  202.34
   8   6  -9  389.69  100.09
   8   6  -9  546.27  120.38
   8  -6  -9  558.84  119.73
   8   6  -8  243.05   76.83
   8   6  -8  425.89   90.81
   8  -6  -8  119.77   41.87
   8  -6  -8  252.48   54.73
   8   6  -7 1115.91  152.73
   8   6  -7  747.16  125.09
  -8   6   7  540.34  106.30
   8  -6  -7  691.75  166.98
   8  -6  -7  563.99  148.07
   8   6  -6 1850.81  154.01
   8   6  -6 1885.17  147.43
  -8   6   6 1703.25  144.81
   8  -6  -6 1957.30  252.66
   8  -6  -6 1628.64  238.87
   8   6  -5  607.94   84.63
   8   6  -5  568.06   73.95
  -8   6   5  494.29   77.58
   8  -6  -5  453.73   77.78
   8  -6  -5  536.33   92.66
   8   6  -4 4769.63  280.11
   8   6  -4 4426.18  243.85
  -8   6   4 5553.20  287.43
   8  -6  -4 5330.74  280.87
   8  -6  -4 5503.55  304.58
   8   6  -3  853.46  112.77
  -8   6   3  974.44  128.28
   8   6  -3  938.04  121.14
   8  -6  -3 1156.35  209.11
   8  -6  -3 1360.46  296.45
  -8  -6   3  839.11  138.34
   8   6  -2 3383.69  198.13
   8   6  -2 4514.43  268.93
  -8  -6   2 3435.68  199.08
   8  -6  -2 3481.91  204.23
   8  -6  -2 3730.95  389.11
  -8   6   1 1640.24   85.51
   8   6  -1 1928.20  105.25
   8   6  -1 1873.17   83.17
  -8   6   1 1776.13   90.56
   8  -6  -1 1667.55  199.92
  -8  -6   1 1848.69  155.49
   8  -6  -1 1472.47   69.22
   8   6   0 1383.30  131.89
   8   6   0 1565.54   87.40
  -8   6   0 1117.91  110.31
  -8   6   0 1424.74   67.37
   8  -6   0 1440.81  194.68
   8  -6   0 2039.59   99.24
   8   6   1 1166.83  140.99
   8   6   1  913.06  203.36
  -8   6  -1 1288.22  158.20
   8  -6   1 1431.71  345.96
   8  -6   1 1091.71  164.13
  -8   6  -2  741.32   93.18
   8   6   2 1272.87  286.06
   8   6   2  819.92  118.60
   8  -6   2  566.87  135.89
   8  -6   2 1029.02  218.70
   8   6   3 2107.15  214.80
   8   6   3 1593.86  214.75
   8  -6   3 1506.06  250.16
   8  -6   3 2029.47  325.28
  -8  -6  -3 1439.48  162.95
   8   6   4 5584.87  472.39
   8  -6   4 4899.88  765.68
   8  -6   4 4819.25  313.78
  -8  -6  -4 3921.71  218.29
   8   6   5  291.81   92.30
   8  -6   5  210.40  100.28
   8  -6   5  150.27   87.93
   8   6   6  504.38  143.24
   8  -6   6  312.40  151.86
   8  -6   6  518.46  180.42
   8   6   7  948.42  187.98
   8  -6   7  649.06  124.82
   8   6   8  259.27  111.81
  -8   6  -8  312.41   67.81
   8  -6   8  351.90  146.98
   8   6   9  207.51   95.18
  -8   6  -9   73.60   52.94
   8   8 -11  176.51   75.76
   8  -8 -11   51.39   28.31
   8   8 -10   37.02   16.45
   8   8 -10   24.82   42.96
   8  -8 -10   87.23   28.56
   8   8  -9  784.38   97.77
   8   8  -9  804.66   71.76
   8  -8  -9  811.76  170.10
   8   8  -8  647.49  110.91
   8   8  -8  775.80  115.89
   8  -8  -8  614.03  140.73
   8   8  -7  104.44   26.92
   8   8  -7   98.77   48.75
   8  -8  -7   96.13   41.08
   8   8  -6  360.92   74.05
   8   8  -6  246.64   50.32
  -8   8   6  235.15   27.09
   8  -8  -6  229.02   35.47
   8  -8  -6  148.89   38.80
   8   8  -5  198.99   59.27
   8   8  -5  141.98   34.91
  -8   8   5  142.70   32.32
   8  -8  -5  247.85   56.29
   8  -8  -5  106.59   37.14
   8   8  -4 1934.29  113.88
   8   8  -4 1838.09  304.92
  -8   8   4 1956.35  116.78
   8  -8  -4 2190.70  128.71
   8  -8  -4 1773.57  302.09
   8   8  -3 3719.50  221.06
   8   8  -3 3247.23  190.26
   8   8  -3 3667.61  307.34
   8  -8  -3 3747.95  221.47
   8  -8  -3 3279.36  235.71
  -8   8   2 1594.66  103.05
   8   8  -2 2015.44  132.86
   8   8  -2 1305.67  286.99
   8   8  -2 1459.42  304.65
   8  -8  -2 1261.41  238.06
   8  -8  -2 1593.70  130.39
  -8   8   1   24.01   18.95
   8   8  -1   80.12   25.59
  -8   8   1   38.03   20.24
   8   8  -1  131.67   69.04
   8   8  -1   40.82   23.02
   8  -8  -1   77.11   44.44
   8  -8  -1   56.77   25.17
   8   8   0   43.21   17.39
   8   8   0   21.53   33.36
   8   8   0   61.96   29.79
  -8   8   0   32.35   20.81
   8  -8   0  167.01   93.33
   8  -8   0   44.59   13.68
  -8   8  -1 1216.07  147.90
   8   8   1 1326.30  317.53
   8   8   1 1561.83  112.75
   8   8   1 1143.86  137.83
   8  -8   1 1365.45  309.88
   8  -8   1 1097.01  196.00
   8   8   2   21.93   20.98
   8   8   2   -8.82   32.32
   8   8   2    2.68    6.00
  -8   8  -2   24.67   18.25
   8  -8   2   16.80  102.38
   8  -8   2   -2.13   22.73
   8   8   3 3184.77  321.53
  -8   8  -3 2359.96  139.58
   8  -8   3 2635.65  600.36
   8  -8   3 2570.02  278.77
   8   8   4 1625.48  239.88
   8  -8   4 1309.40  301.86
   8  -8   4 1418.49  321.75
   8   8   5  127.08   63.53
   8  -8   5  165.38  123.58
   8   8   6  271.11  104.73
   8  -8   6   42.14   53.02
   8  -8   6  132.18   79.55
   8   8   7 1057.50  219.46
  -8   8  -7  706.18   96.27
   8  -8   7  605.73  164.84
   8   8   8   81.56   93.70
  -8   8  -8   -4.31   36.07
   8  -8   8  -23.45   73.94
   8   8   9  180.16  130.76
  -8   8  -9  586.08  160.91
   8  10 -10   -5.48   17.50
   8  10 -10   62.52   59.67
   8 -10 -10   32.69   12.50
   8 -10  -9   29.69   26.71
   8  10  -8 1797.50  212.91
   8  10  -8 1879.51  236.05
   8 -10  -8 1854.38  319.93
   8  10  -7  199.10   62.78
   8  10  -7   81.23   45.70
   8 -10  -7  123.35   48.43
   8  10  -6 3250.22  341.68
   8  10  -6 3359.33  279.47
  -8  10   6 3175.31  256.91
   8 -10  -6 3153.05  308.59
   8 -10  -6 2431.49  324.38
   8  10  -5  391.78   71.81
   8  10  -5  497.28  102.04
  -8  10   5  384.95   63.88
   8 -10  -5  518.75  103.76
   8 -10  -5  403.13   92.01
   8  10  -4   27.28   23.56
   8  10  -4   78.63   27.07
  -8  10   4   16.24    9.21
   8 -10  -4   49.52   14.67
   8 -10  -4   87.75   48.79
   8  10  -3  191.27   48.14
   8  10  -3  312.41   72.41
   8  10  -3   75.68   39.76
   8 -10  -3  216.17   50.74
   8 -10  -3  362.57   75.29
   8  10  -2 2110.48  129.89
  -8  10   2 2218.03  136.16
   8  10  -2 2075.74  288.25
   8  10  -2 2666.95  161.48
   8 -10  -2 2457.72  200.48
   8 -10  -2 2363.60  188.67
   8  10  -1  860.65  106.97
   8  10  -1 1138.61  149.01
   8  10  -1  577.85  207.86
   8 -10  -1 1229.00  224.47
   8 -10  -1  916.45  146.64
  -8  10   0 7249.75  416.35
   8  10   0 9053.31  521.12
   8  10   010928.20  628.76
   8  10   011347.92  635.30
   8 -10   011710.81  789.88
   8 -10   012110.29  691.99
   8  10   1  496.11   65.00
   8  10   1  551.18  149.25
   8  10   1  391.83   84.60
   8 -10   1  326.08   67.74
   8 -10   1  286.06   99.55
   8  10   2 1932.02  122.34
   8  10   2 2279.27  173.19
   8  10   2 2406.68  148.48
   8 -10   2 3653.05  592.44
   8 -10   2 2301.87  520.61
   8  10   3  319.39   83.17
   8 -10   3  178.78   95.35
   8 -10   3  131.95   92.31
   8  10   4 2036.11  239.99
   8 -10   4 1426.23  345.91
   8 -10   4 1163.39  303.86
   8  10   5  261.85   94.95
   8 -10   5   85.85   89.62
   8 -10   5  514.65  141.61
   8  10   6 1981.63  427.72
   8 -10   6 2250.99  412.29
   8 -10   6 2341.41  469.63
   8  10   7  110.43   60.12
  -8  10  -7  146.00   39.09
   8 -10   7  149.45   95.40
   8  10   8  460.37  184.54
  -8  10  -8 1008.13  198.34
   8 -10   8  951.50  220.78
   8  10   9   86.03   47.02
  -8  10  -9   65.02   40.55
   8  12 -10  565.72  215.80
   8 -12 -10  546.78  176.93
   8  12  -9  123.52   60.74
   8  12  -9  349.62  127.67
   8 -12  -9  223.07   69.29
   8  12  -8 1952.53  219.31
   8  12  -8 1898.50  225.23
   8 -12  -8 1794.83  212.06
   8  12  -7  950.67  123.29
   8  12  -7  990.96  214.80
   8 -12  -7 1064.59  199.81
   8  12  -6 2325.72  290.40
  -8  12   6 2282.37  271.14
  -8  12   6 2606.31  309.44
   8  12  -6 2277.61  283.00
   8 -12  -6 2480.91  321.37
   8  12  -5  989.54  189.53
   8  12  -5  992.34  156.91
  -8  12   5  724.23  101.35
   8 -12  -5  814.58  150.36
   8 -12  -5  756.17  152.74
   8  12  -4 1830.43  118.91
  -8  12   4 1738.60  116.67
   8  12  -4 2198.91  135.15
   8 -12  -4 1918.01  132.02
   8 -12  -4 1626.88  285.28
   8  12  -3   53.38   31.12
   8  12  -3   64.84   33.13
   8 -12  -3   66.80   72.15
   8 -12  -3   54.88   24.38
   8  12  -2 4676.08  247.52
   8  12  -2 4482.28  244.13
   8  12  -2 4186.67  520.85
   8 -12  -2 4624.04  245.88
   8 -12  -2 4741.74  359.32
   8  12  -1 1842.67  305.83
  -8  12   1 1690.77  222.83
   8  12  -1 1966.00  168.88
   8  12  -1 2114.58  115.99
   8 -12  -1 2337.61  301.92
   8 -12  -1 2995.63  224.07
   8  12   0 4048.82  213.65
   8  12   0 4401.04  268.25
   8  12   0 3698.78  211.06
   8 -12   0 4038.50  226.01
   8 -12   0 3770.44  317.40
   8  12   1 2352.82  126.06
   8  12   1 2902.41  262.59
   8  12   1 2154.21  139.47
   8 -12   1 1864.29  335.86
   8 -12   1 1647.75  540.58
   8  12   2 3581.77  248.51
   8  12   2 3491.70  197.07
   8 -12   2 3157.08  438.71
   8 -12   2 4536.87  317.17
   8  12   3  284.32   82.34
   8 -12   3  289.97   80.72
   8 -12   3  380.23  124.05
   8  12   4 1883.83  210.21
   8 -12   4 1555.23  232.26
   8 -12   4 1072.75  270.76
   8  12   5  311.14   98.92
  -8  12  -5  328.64   85.03
   8 -12   5  390.59  193.06
   8  12   6 1592.68  285.58
  -8  12  -6 2181.09  375.56
   8 -12   6 2767.15  480.34
   8  12   7   86.66   43.87
  -8  12  -7  -22.10   38.84
   8 -12   7  110.05   94.78
   8  12   8 1083.35  387.66
  -8  12  -8 1903.49  363.06
   8  12   9  167.52   67.78
  -8  12  -9  282.11  121.31
   8 -12   9  221.50   79.80
   8  14 -10   62.09   39.55
   8  14 -10  101.65   44.49
   8 -14 -10   39.62   20.41
   8  14  -9  339.22   79.60
   8  14  -9  341.63  116.00
   8 -14  -9  481.11   89.61
   8  14  -8  120.57   35.25
   8  14  -8   18.98   39.59
   8 -14  -8  234.10   54.96
   8  14  -7 1726.62  291.35
   8  14  -7 1798.99  328.00
   8 -14  -7 1726.08  283.43
   8  14  -6  393.45   94.56
   8  14  -6  373.42  127.59
   8 -14  -6  425.15  108.58
  -8  14   5 2931.95  237.67
   8  14  -5 3158.85  264.39
  -8  14   5 3060.66  248.24
   8  14  -5 2770.94  235.64
   8 -14  -5 2691.62  227.17
   8  14  -4 1253.73  200.20
  -8  14   4 1176.92  174.61
   8  14  -4 1387.07  208.79
   8 -14  -4 1364.71  208.54
   8 -14  -4 1245.83  200.71
   8  14  -3  724.23   96.80
   8  14  -3  797.47  131.82
   8 -14  -3  594.80  148.68
   8 -14  -3  683.45  136.65
   8  14  -2  249.00   68.06
   8  14  -2  311.57   57.00
   8  14  -2  305.04   66.66
   8 -14  -2  364.77   86.68
   8 -14  -2  185.65   89.76
   8  14  -1 2757.59  175.03
  -8  14   1 3351.22  371.92
   8  14  -1 2241.55  153.73
   8  14  -1 2723.85  159.69
   8 -14  -1 2750.18  283.19
   8 -14  -1 3395.88  209.31
   8  14   0 1690.76  100.17
   8  14   0 2476.16  230.35
   8  14   0 1914.32  136.09
   8 -14   0 1356.21  249.68
   8 -14   0 1453.61  343.91
   8  14   1 1398.71  163.73
   8  14   1 1817.28  138.49
   8  14   1 1245.63  154.71
   8 -14   1  890.27  179.82
   8 -14   1 1067.72  309.92
   8  14   2  158.65   49.16
   8 -14   2  123.24  131.41
   8 -14   2  245.90  103.12
   8  14   3  848.23  189.09
   8 -14   3  794.92  195.76
   8 -14   3  625.65  227.57
   8  14   4   71.46   50.25
  -8  14  -4   39.20   29.56
   8 -14   4   66.04   47.25
   8  14   5 1600.55  350.69
  -8  14  -5 1568.25  161.41
   8 -14   5 1201.10  438.97
   8  14   6    1.01   57.40
  -8  14  -6   57.11   35.30
   8 -14   6  122.31   93.05
   8  14   7  950.86  133.35
  -8  14  -7 1073.25  269.14
   8 -14   7 1758.03  323.40
   8  14   8  381.53  164.92
  -8  14  -8  233.65   47.25
   8 -14   8  282.52  115.32
   8  14   9  159.84  115.55
  -8  14  -9  250.90   67.60
   8 -14   9  304.52  103.08
   8  16 -10 1111.56  179.89
   8  16 -10  726.44  220.91
   8  16  -9   41.02   24.68
   8  16  -9    4.60   41.66
   8 -16  -9   32.36   36.76
   8  16  -8 1067.88  196.35
   8  16  -8  867.56  162.30
   8 -16  -8 1097.11  248.11
   8  16  -7  290.33   84.11
   8 -16  -7  367.77   88.23
   8  16  -6   57.93   15.98
   8 -16  -6  -25.64   24.39
  -8  16   5   21.96    8.97
   8  16  -5   58.86   25.33
  -8  16   5   29.14    9.50
   8 -16  -5  -16.88   26.39
   8  16  -4 2737.47  231.09
  -8  16   4 2414.42  198.86
   8 -16  -4 2298.15  200.10
  -8  16   3  110.37   28.02
   8  16  -3  163.64   43.08
  -8  16   3  113.27   24.84
   8 -16  -3  214.03   58.23
   8  16  -2 1108.69  189.15
  -8  16   2  736.62  118.66
   8  16  -2  798.86  142.14
   8  16  -2  728.15  112.32
   8 -16  -2 1452.95  175.62
   8  16  -1  358.55   99.70
  -8  16   1  370.11   51.07
   8  16  -1  242.05   64.13
   8  16  -1  434.21   91.12
   8 -16  -1  686.20  140.22
   8  16   0 1159.70  248.09
  -8  16   0  761.47   98.34
   8  16   0  713.40  105.43
   8  16   0  778.93   95.14
   8 -16   0  762.95  150.39
   8  16   1  327.70   77.26
  -8  16  -1  206.77   43.96
   8  16   1  273.87   53.48
   8  16   1  155.17   35.05
   8 -16   1   73.75   37.26
   8  16   2 3307.04  332.87
  -8  16  -2 3379.33  302.77
   8 -16   2 3717.51  326.59
   8  16   3  439.30   94.40
  -8  16  -3  702.25  146.48
   8 -16   3  829.39  160.93
   8  16   4   95.52   24.90
  -8  16  -4   56.78   47.41
   8 -16   4   24.64   74.63
   8  16   5  401.69  146.74
  -8  16  -5  333.23   69.57
   8 -16   5  247.93  101.96
   8  16   6  185.12   94.80
  -8  16  -6  -44.00   36.00
   8 -16   6   35.13  102.38
   8  16   7   33.48   58.49
  -8  16  -7   86.96   53.06
   8 -16   7   70.76   78.36
   8  16   8  335.58  111.92
  -8  16  -8  438.98  104.16
   8 -16   8  458.71  184.72
   8  18  -9  454.21  131.83
   8  18  -9  461.68  112.86
   8 -18  -9  258.83  107.81
   8  18  -8 1077.79  210.36
   8 -18  -8  790.09  122.49
   8  18  -7  120.59   43.94
   8 -18  -7   38.59   29.74
   8  18  -6 2553.15  414.68
   8 -18  -6 2523.04  413.52
   8  18  -5    8.44   20.85
  -8  18   5   35.39    7.04
   8 -18  -5   30.51   22.51
  -8  18   4  875.48  183.39
   8  18  -4 1232.82  155.15
  -8  18   4 1360.50  171.26
   8 -18  -4 1481.02  255.87
  -8  18   3  117.01   33.91
   8  18  -3  362.74   81.77
  -8  18   3  201.39   29.50
   8 -18  -3  385.97   76.40
  -8  18   2 1709.24  307.84
   8  18  -2 1720.04  147.99
  -8  18   2 1957.21  165.44
   8  18  -2 1384.38  234.11
   8 -18  -2 1863.34  251.69
   8  18  -1   12.78   21.39
  -8  18   1   34.45   11.90
   8  18  -1   13.96   35.88
   8  18  -1   10.90   16.02
   8 -18  -1   33.55   21.33
   8  18   0 3690.01  280.12
  -8  18   0 4413.57  333.29
   8  18   0 4012.24  299.04
   8 -18   0 3028.61  371.76
   8  18   1 2462.04  241.55
  -8  18  -1 2170.18  187.25
   8  18   1 2026.01  165.50
   8  18   1 1768.34  211.30
   8 -18   1 3000.09  307.08
   8  18   2 1376.14  220.31
  -8  18  -2 1487.84   61.26
   8 -18   2 1442.63  177.90
   8  18   3  157.31   49.53
  -8  18  -3  268.83   73.60
   8 -18   3  253.57  105.25
   8  18   4  319.27  110.02
  -8  18  -4  525.36  107.39
   8 -18   4  505.42  137.29
   8  18   5   65.64   60.71
  -8  18  -5   80.30   54.24
   8 -18   5  186.14   58.79
   8  18   6 1412.87  210.66
  -8  18  -6  811.09  248.83
   8 -18   6  721.20  190.90
   8  18   7  245.47  104.75
  -8  18  -7  353.91  113.43
   8 -18   7  425.18  161.26
   8  18   8  169.91   62.86
  -8  18  -8  374.69  135.06
   8 -18   8  413.67  166.25
   8  20  -9  808.02  124.11
   8  20  -8  295.84   75.97
   8 -20  -8   92.95   22.24
   8  20  -7  594.81  179.10
   8 -20  -7  817.53  145.20
   8  20  -6   14.77   41.86
   8 -20  -6   38.45   20.93
   8  20  -5 1421.87  236.09
   8 -20  -5 1097.41  196.47
   8  20  -4 4619.47  441.51
  -8  20   4 4574.69  432.99
   8 -20  -4 5706.58  562.22
   8  20  -3 1424.40  177.55
  -8  20   3 1370.23  167.38
   8 -20  -3 1611.31  305.75
   8  20  -2  631.12  162.08
  -8  20   2  662.84  159.88
   8 -20  -2  642.00  178.21
   8  20  -1 1509.27  134.99
  -8  20   1 1754.37  151.05
   8 -20  -1 1650.41  279.80
   8  20   0   -4.60   21.96
  -8  20   0   24.04   24.67
   8  20   0   52.03   30.23
   8  20   0   16.87   10.70
   8 -20   0  138.73   41.18
   8  20   1 2294.56  336.52
  -8  20  -1 2183.63  267.25
   8  20   1 1943.53  232.78
   8  20   1 2067.26  274.90
   8 -20   1 2261.78  476.29
   8  20   2 2895.97  385.72
  -8  20  -2 2740.35  333.64
   8 -20   2 2382.93  644.99
   8  20   3 1067.72  278.68
  -8  20  -3 1184.18   59.12
   8 -20   3 1157.36  247.32
   8  20   4 1034.10  202.97
  -8  20  -4 1607.90  309.20
   8 -20   4 1548.61  293.01
  -8  20  -5  456.55  157.93
   8 -20   5  671.50  221.50
   8  20   6  -22.84   59.39
  -8  20  -6  241.42   96.83
   8 -20   6   62.17  119.38
   8  20   7  235.04   99.83
  -8  20  -7  298.07   83.00
   8 -20   7  303.07  133.97
   8  20   8  145.67   87.43
  -8  20  -8   87.01   48.33
   8 -20   8   22.43  132.52
   8  22  -8  117.84   47.60
   8 -22  -8   15.06   19.44
   8  22  -7   68.85   37.84
   8 -22  -7   59.64   28.65
   8  22  -6  813.62  162.14
   8 -22  -6  744.20  234.03
   8  22  -5  468.30  125.07
   8 -22  -5  573.24  136.70
   8  22  -4   62.33   22.93
  -8  22   4   36.38   18.61
   8 -22  -4   41.10   17.78
   8  22  -3 4261.24  408.89
  -8  22   3 4309.01  412.09
   8 -22  -3 4884.70  475.79
   8  22  -2  656.35  191.86
  -8  22   2  515.52  128.12
   8 -22  -2  575.86  147.89
   8  22  -1 1078.22  230.36
  -8  22   1 1087.08  224.25
   8 -22  -1  955.53  281.43
   8  22   0  755.23  199.89
  -8  22   0  925.41  227.09
   8 -22   0  362.84  117.22
   8  22   1  480.46  109.17
  -8  22  -1  408.90   69.05
   8  22   1  351.70   95.03
   8 -22   1  330.24  145.13
   8  22   2  198.67   69.70
  -8  22  -2  243.60   88.57
   8 -22   2  228.18   64.96
   8  22   3 3759.62  620.30
  -8  22  -3 4091.40  662.31
   8 -22   3 3308.46  563.70
   8  22   4  910.87  194.15
   8 -22   4 1269.89  289.38
   8  22   5  126.35   34.57
  -8  22  -5  223.07   62.55
   8 -22   5  281.12  141.26
   8  22   6  279.68   96.20
  -8  22  -6  104.73   43.39
   8 -22   6  297.49  137.76
   8  22   7   80.64   60.03
  -8  22  -7  371.78  130.97
   8 -22   7  248.31  147.85
   8  24  -8  657.63  115.83
   8 -24  -8  301.35  122.31
   8  24  -7   26.76   15.73
   8 -24  -7   20.95   20.68
   8  24  -6 1211.09  293.25
   8 -24  -6 1172.03  354.82
   8  24  -5  608.73  169.04
   8 -24  -5  594.73  168.12
   8  24  -4 2203.79  249.12
  -8  24   4 1901.82  233.49
   8 -24  -4 1807.68  398.72
   8  24  -3  374.34   63.16
  -8  24   3  275.57   32.37
   8 -24  -3  155.03   52.23
   8  24  -2 1219.46  193.29
  -8  24   2 1484.09  243.35
   8 -24  -2  987.53  219.10
   8  24  -1  355.71   82.93
  -8  24   1  300.69   57.07
   8 -24  -1   92.06   40.02
   8  24   0 1212.40  167.30
  -8  24   0 1279.86  197.61
   8 -24   0 1303.75  327.53
   8  24   1   11.21   23.15
  -8  24  -1    9.34   30.71
   8  24   1    5.06    7.25
   8 -24   1  112.03  135.73
   8  24   2  590.89  156.06
  -8  24  -2  685.55  132.71
   8 -24   2  347.67  124.22
   8  24   3   70.35   33.23
  -8  24  -3   63.16   37.33
   8 -24   3   79.81   91.86
   8  24   4 1211.45  280.50
  -8  24  -4 1662.27  264.18
   8 -24   4 1283.29  261.57
   8  24   5   72.23   36.11
  -8  24  -5   88.87   32.83
   8 -24   5  318.97  175.91
   8  24   6 1129.00  221.30
  -8  24  -6  583.30  305.25
   8 -24   6 1125.70  263.99
   8  24   7  -24.27   63.67
  -8  24  -7   55.98   31.34
   8 -24   7  334.18  157.48
   8  26  -7  207.32  118.12
   8 -26  -7  300.39   82.34
   8  26  -6  219.92   80.26
   8 -26  -6  255.87   89.65
   8  26  -5  341.84  133.26
   8 -26  -5  298.83  101.98
   8  26  -4   98.03   35.64
   8 -26  -4  117.11   46.17
   8  26  -3  759.20  221.83
  -8  26   3  690.58  162.10
   8 -26  -3  673.46  196.37
   8  26  -2  486.53  153.47
  -8  26   2  415.20  105.98
   8 -26  -2  435.21  113.65
   8  26  -1  438.73  101.57
  -8  26   1  521.28   84.86
   8 -26  -1  244.54   65.50
   8  26   0 1117.08  167.09
  -8  26   0 1288.20   57.63
   8 -26   0 1200.81  300.90
   8  26   1  986.66  159.42
  -8  26  -1 1330.53  157.40
   8 -26   1  867.00  240.24
   8  26   2  349.52   78.04
  -8  26  -2  204.55   55.08
   8 -26   2  385.44  180.41
   8  26   3  255.84   86.70
  -8  26  -3  314.56   72.35
   8 -26   3  240.68  107.99
   8  26   4  638.66  184.59
  -8  26  -4  676.69  169.97
   8 -26   4  509.94  163.64
   8  26   5   79.58   25.27
  -8  26  -5  139.46   49.32
   8 -26   5  286.22  208.59
  -8  26  -6  310.30  107.76
   8 -26   6  666.97  215.03
   8  28  -7 2316.07  359.48
   8 -28  -7 1867.50  377.14
   8  28  -6  153.43   75.47
   8 -28  -6  147.75   58.23
   8  28  -5  498.94  174.05
   8 -28  -5  367.93  135.26
   8  28  -4  664.48  153.41
   8 -28  -4  427.13  112.89
   8  28  -3  932.88   98.50
  -8  28   3  517.06  158.35
   8 -28  -3  564.14  156.37
   8  28  -2   47.87   27.95
  -8  28   2   33.76   24.00
   8 -28  -2  101.71   32.13
   8  28  -1 2444.47  266.59
  -8  28   1 2715.51  273.86
   8 -28  -1 1795.17  578.11
   8  28   0   -1.12   23.19
  -8  28   0   52.53   41.95
   8 -28   0  336.99  119.41
   8  28   1 2176.96  367.34
  -8  28  -1 3376.74  522.59
   8 -28   1 1974.76  791.23
   8  28   2  349.70   88.18
  -8  28  -2  353.84   81.62
   8 -28   2  213.50  114.54
   8  28   3  270.31   83.98
  -8  28  -3  290.65   72.56
   8 -28   3  320.83  153.49
   8  28   4  346.71   91.33
  -8  28  -4  395.96  130.10
   8 -28   4  209.78  143.90
   8  28   5  644.73  198.23
  -8  28  -5 1892.56  246.93
   8 -28   5 1669.97  325.52
   8  30  -6   67.09   27.35
   8 -30  -6   76.01   31.70
   8  30  -5  907.41  130.85
   8 -30  -5  357.05  116.28
   8  30  -4 1574.39  250.94
   8 -30  -4  640.34  243.73
   8  30  -3   12.42   30.46
   8 -30  -3   -5.41   43.25
   8  30  -2  267.71  105.92
   8 -30  -2  377.14  107.44
   8  30  -1  597.78  167.54
  -8  30   1  679.56  117.06
   8 -30  -1  541.23  170.39
   8  30   0   87.09   40.12
  -8  30   0   55.90   27.82
   8 -30   0   94.91   99.16
   8  30   1   -2.88   26.57
  -8  30  -1   77.48   34.37
   8 -30   1  168.77   96.85
   8  30   2  898.74  227.89
  -8  30  -2  646.79  178.83
   8  30   3   38.86   14.88
  -8  30  -3   51.67   39.13
   8 -30   3  -68.34  110.46
   8  30   4  273.19   70.29
  -8  30  -4  133.00   42.77
   8 -30   4  112.19   57.73
   8  32  -4   61.24   32.48
   8 -32  -4   55.49   20.87
   8  32  -3   58.79   35.72
   8 -32  -3  -29.15   84.70
   8  32  -2   83.79   41.73
   8 -32  -2  104.73   93.50
   8  32  -1 1381.78  313.80
   8 -32  -1 1699.82  319.02
   8  32   0   11.22   18.27
  -8  32   0   38.17   27.06
   8 -32   0  122.34   53.47
   8  32   1  277.13   72.79
  -8  32  -1  277.37   74.68
   8 -32   1   32.88  107.47
   8  32   2  585.53  200.75
  -8  32  -2  838.67  126.33
   8 -32   2  636.90  180.05
   8  32   3  106.91   49.08
  -8  32  -3   12.15   35.10
   8 -32   3  -14.15  114.36
   8  34  -2  192.58   57.89
   8 -34  -2  161.63  156.38
   8  34  -1  168.40   93.26
   8 -34  -1  287.68  162.49
   8  34   0  -10.83   27.58
  -8  34   0   17.56   41.85
   8 -34   0  208.89  107.62
  -8  34  -1  522.76  146.24
   8 -34   1  491.71  197.67
   9   1 -11  367.44  156.25
   9  -1 -11  517.82  153.38
   9   1 -10  179.30   77.92
   9  -1 -10  108.57   53.99
   9   1  -9   12.18   14.41
   9   1  -9   23.13   22.40
   9  -1  -9   94.97   33.63
   9   1  -8   13.62   12.50
   9   1  -8   40.95   21.17
   9  -1  -8   17.80   19.40
   9  -1  -8   39.52   19.96
   9   1  -7  582.74  155.93
  -9   1   7  521.83   99.64
   9   1  -7  786.18  186.57
   9  -1  -7  488.27  141.70
  -9  -1   7  465.66   89.65
   9  -1  -7  761.20  184.49
   9   1  -6  958.37  180.87
   9   1  -6  810.77  101.59
  -9   1   6  847.11  127.77
   9  -1  -6  704.30  165.17
   9  -1  -6 1018.24  139.72
  -9   1   5  455.53   91.34
   9   1  -5  538.10   91.76
   9  -1  -5  551.86   89.68
  -9  -1   5  413.39   92.04
   9  -1  -5  680.36  126.58
   9   1  -4   57.37   27.00
  -9   1   4  119.83   25.64
   9   1  -4  124.71   33.98
   9  -1  -4   70.65   31.27
  -9  -1   4   96.81   24.98
   9  -1  -4  136.99   35.27
   9   1  -3   20.05   42.86
  -9   1   3   28.55   16.11
   9   1  -3   22.10   25.73
   9  -1  -3   34.26   23.76
  -9  -1   3   28.30   15.31
   9  -1  -3  -17.07   22.20
   9   1  -2 1228.73  159.44
   9   1  -2 1894.00  125.84
  -9   1   2 1498.96  314.42
  -9  -1   2 1640.46   99.49
   9  -1  -2 1605.71  100.52
   9  -1  -2 1371.43  316.14
  -9  -1   2 1614.33  103.04
  -9   1   1 1675.98  105.83
   9   1  -1 1150.83  199.16
   9   1  -1 1481.01  308.02
   9  -1  -1 1494.70  313.25
   9  -1  -1 2175.69  175.93
  -9  -1   1 1903.40  121.01
   9   1   0 1256.48  154.52
   9   1   0 1909.13  283.52
   9  -1   0 2127.52  193.91
   9  -1   0 1373.95  285.83
   9   1   1 1027.49  158.66
   9   1   1 1393.83  165.43
  -9   1  -1  992.67  126.33
   9  -1   1 1329.51  182.09
   9  -1   1 1291.34  153.20
  -9  -1  -1 1132.14  131.94
   9   1   2  389.02  108.12
  -9   1  -2  319.82   50.01
   9   1   2  351.28   60.22
   9  -1   2  435.47   75.05
  -9  -1  -2  254.80   51.08
   9  -1   2  307.08   82.90
   9   1   3  -78.04   62.81
  -9   1  -3   20.00   14.55
   9   1   3   61.41   27.25
   9  -1   3  215.24   70.23
  -9  -1  -3    8.35   13.50
   9  -1   3   19.13   51.06
  -9   1  -4 1121.99  166.30
   9   1   4 1154.16  254.58
   9   1   4 1146.88  222.40
   9  -1   4  889.68  154.11
   9  -1   4 1369.86  244.50
   9   1   5  102.57  113.48
   9   1   5   52.89   44.40
  -9   1  -5   60.79   18.75
   9  -1   5  195.30  114.45
   9  -1   5   41.36   49.98
  -9  -1  -5   51.76   14.00
   9   1   6 1181.49  208.62
   9   1   6 1085.36  220.69
   9  -1   6  803.02  320.04
   9  -1   6 1020.04  266.45
   9   1   7  126.10   63.55
   9  -1   7  377.69  122.15
   9  -1   7  105.88   58.49
   9   1   8  165.16   84.48
   9  -1   8  216.07  130.44
   9   1   9  -84.67  107.25
   9  -1   9  205.30  181.29
   9   3 -10   84.37   40.50
   9  -3 -10  129.65   33.85
   9   3  -9   42.82   15.95
   9   3  -9   78.89   36.71
   9  -3  -9  105.63   32.58
   9   3  -8  119.74   46.66
   9  -3  -8   43.34   23.22
   9  -3  -8   39.09   23.32
   9   3  -7  965.05  185.67
   9   3  -7  661.89  140.88
   9  -3  -7  503.74  142.24
   9  -3  -7  899.80  216.99
   9   3  -6   95.25   29.22
  -9   3   6   67.79   14.50
   9   3  -6  115.35   44.90
   9  -3  -6   56.38   29.78
   9  -3  -6  146.56   34.84
   9   3  -5  904.18  150.29
   9   3  -5  882.56  176.05
  -9   3   5  533.71  108.61
   9  -3  -5  487.84   97.93
   9  -3  -5  700.58  111.65
   9   3  -4   78.13   45.39
   9   3  -4  154.01   37.41
  -9   3   4  119.77   27.19
   9  -3  -4   24.13   12.81
   9  -3  -4  122.37   42.34
   9   3  -3   29.52   19.51
   9   3  -3   11.84   24.78
  -9   3   3   10.89   10.29
   9  -3  -3   81.12   37.20
   9  -3  -3   40.26   57.47
   9   3  -2  109.56   31.44
   9   3  -2   91.04   45.06
  -9   3   2   85.04   24.40
   9  -3  -2   81.24   24.31
   9  -3  -2   37.17   56.41
   9   3  -1 1617.66  157.09
  -9   3   1 2206.00  140.01
   9   3  -1 1823.60  112.77
  -9   3   1 1777.28  111.02
   9  -3  -1 1964.46  152.48
   9  -3  -1 1788.67  111.86
  -9  -3   1 1733.11  109.20
  -9   3   0  820.92  164.11
   9   3   0  613.17  140.13
   9   3   0  791.47  109.79
   9  -3   0  832.08  142.02
   9  -3   0 1008.31  188.79
  -9   3  -1 1098.40  147.80
   9   3   1 1760.29  321.67
   9   3   1 1681.20  200.25
   9  -3   1 1356.61  221.80
   9  -3   1 1209.20  165.40
  -9  -3  -1 1281.23  148.24
   9   3   2  108.00   70.82
   9   3   2   82.68   23.24
   9  -3   2  -24.36   60.40
   9  -3   2   36.00   20.64
  -9  -3  -2    0.88   10.74
   9   3   3  244.92  101.10
  -9   3  -3  135.63   33.52
   9   3   3  263.83   66.45
   9  -3   3  131.24   56.14
  -9  -3  -3  142.91   29.88
   9   3   4  117.01   57.52
   9   3   4   78.86   49.95
   9  -3   4  158.24   86.63
   9  -3   4  115.66   54.11
  -9  -3  -4   24.37   11.78
  -9   3  -5  904.81  148.73
   9   3   5  784.96  238.13
   9   3   5  877.99  199.58
   9  -3   5 1065.92  170.16
   9  -3   5 1296.73  487.44
  -9  -3  -5 1035.17  125.25
   9   3   6   -1.31   57.69
   9   3   6    9.99   15.72
   9  -3   6  -13.60  107.06
   9  -3   6   15.06   53.58
   9   3   7  159.64   65.36
   9  -3   7  118.05   92.37
   9  -3   7  168.21   78.91
   9   3   8   99.92   76.92
   9  -3   8  193.03  127.33
   9   3   9  169.44   89.68
  -9   3  -9    4.80   38.18
   9   5 -10  198.45   85.76
   9  -5 -10  234.87   76.79
   9   5  -9  137.48   56.41
   9   5  -9  191.01   45.39
   9  -5  -9  260.20   66.61
   9   5  -8  166.40   54.71
   9   5  -8   43.34   22.96
   9  -5  -8   50.59   24.83
   9  -5  -8   24.34   27.74
   9   5  -7   35.21   34.33
   9   5  -7   42.05   18.61
   9  -5  -7   -5.37   22.76
   9  -5  -7   54.13   40.07
  -9   5   6   44.61   12.83
   9   5  -6   79.72   26.17
   9   5  -6   38.11   33.40
   9  -5  -6  105.42   51.13
   9  -5  -6   65.22   31.69
  -9   5   5  125.32   24.80
   9   5  -5  110.68   26.85
   9   5  -5  197.15   64.61
   9  -5  -5   71.49   30.93
   9  -5  -5  107.28   29.53
   9   5  -4 1797.64  115.23
   9   5  -4 2453.44  155.79
  -9   5   4 1987.85  125.99
   9  -5  -4 2300.17  260.84
   9  -5  -4 2131.16  300.14
   9   5  -3  713.71   92.76
   9   5  -3  768.04  147.91
  -9   5   3  766.94  113.84
   9  -5  -3  769.11  129.17
   9  -5  -3  601.10  113.12
   9   5  -2  529.08  110.35
   9   5  -2  479.37  100.53
  -9   5   2  295.31   63.14
   9  -5  -2  478.00   95.69
   9  -5  -2  529.79   96.11
   9   5  -1  117.71   33.80
  -9   5   1  128.02   46.73
   9   5  -1  254.33   60.96
   9  -5  -1  134.73   36.47
   9  -5  -1   90.58   52.25
  -9   5   0 2130.61  119.44
   9   5   0 1737.67  318.18
   9   5   0 1907.86  104.50
   9  -5   0 2700.62  156.16
   9  -5   0 1757.14  323.53
  -9   5  -1  156.42   42.45
   9   5   1  154.46   58.37
   9   5   1  134.09   38.41
   9  -5   1  299.70   59.11
   9  -5   1  135.33   67.31
  -9  -5  -1  152.06   36.90
  -9   5  -2 1229.60  173.20
   9   5   2 1898.64  215.22
   9   5   2 1282.77  160.00
   9  -5   2 1115.88  140.36
   9  -5   2 1832.86  184.67
  -9  -5  -2 1438.31  169.98
   9   5   3  391.33  124.47
   9   5   3  326.32   65.18
   9  -5   3  251.55  107.21
   9  -5   3  199.46   87.25
  -9  -5  -3  219.66   31.08
  -9   5  -4  145.28   40.22
   9   5   4  348.56  130.33
   9   5   4  284.46   73.89
   9  -5   4  262.69   66.89
   9  -5   4  187.93   97.22
  -9  -5  -4  155.36   33.45
   9   5   5  120.80   33.39
   9   5   5  431.44  113.07
   9  -5   5  479.17  192.52
   9  -5   5  447.72  142.46
  -9  -5  -5   65.74   23.27
   9   5   6  302.31  145.74
   9  -5   6  -10.14   98.94
   9  -5   6  155.97   94.65
   9   5   7   80.89   98.39
   9  -5   7  207.34  108.13
   9  -5   7  165.00  100.53
   9   5   8 1026.94  317.97
   9  -5   8  708.76  213.27
   9   5   9   40.30  114.40
  -9   5  -9   51.96   36.47
   9   7 -10  145.13   74.14
   9   7 -10  429.11  101.07
   9  -7 -10  397.02  128.94
   9   7  -9  165.63   54.52
   9   7  -9  391.69   86.39
   9  -7  -9  261.94   73.31
   9   7  -8  962.34  134.90
   9   7  -8 1138.18  152.84
   9  -7  -8  715.68  161.83
   9   7  -7   11.83   10.82
   9   7  -7    3.81   36.54
   9  -7  -7   18.19   17.71
   9  -7  -7   18.95   29.03
   9   7  -6  772.45  185.97
   9   7  -6  885.23  148.55
   9  -7  -6  923.48  162.96
   9  -7  -6 1063.58  215.73
   9   7  -5  927.39  174.56
   9   7  -5  803.23  123.89
  -9   7   5  910.39  137.51
   9  -7  -5 1302.82  242.12
   9  -7  -5  869.32  183.38
   9   7  -4  237.14   57.28
   9   7  -4  225.88   57.50
  -9   7   4  207.79   49.94
   9  -7  -4  247.46   57.43
   9  -7  -4  235.44   56.92
   9   7  -3  526.38   70.57
   9   7  -3  851.86  123.62
  -9   7   3  637.46  119.18
   9  -7  -3  893.18  145.15
   9  -7  -3  802.18  167.87
   9   7  -2   47.62   27.95
  -9   7   2  108.16   33.53
   9   7  -2   34.15   32.38
   9  -7  -2  128.45   37.00
   9  -7  -2  -79.16   51.34
   9   7  -1   70.89   20.90
  -9   7   1  128.85   36.80
   9   7  -1  126.21   49.93
   9  -7  -1   90.04   27.10
   9  -7  -1   84.54   31.08
   9   7   0 1267.54  179.92
   9   7   0 1266.96  145.90
   9  -7   0  741.09  116.50
   9  -7   0 1383.90  171.44
   9   7   1  528.02  106.21
   9   7   1  550.50   73.11
   9  -7   1  685.39  151.73
   9  -7   1  651.27   95.52
   9   7   2 1814.96  108.57
   9   7   2 3457.91  393.46
   9  -7   2 2578.25  217.87
   9  -7   2 1509.98  252.45
   9   7   3 3129.42  445.80
   9   7   3 2832.44  250.82
   9  -7   3 3364.11  471.37
   9  -7   3 2768.99  388.83
   9   7   4  216.02   57.52
   9  -7   4  122.05  110.26
   9  -7   4  352.99  101.85
   9   7   5  116.89   73.80
   9  -7   5  173.51   87.73
   9  -7   5  345.54  160.65
   9   7   6  152.03   56.91
   9  -7   6  376.00  134.74
   9  -7   6  354.78  132.95
   9   7   7  162.43   68.80
   9  -7   7  319.08  135.01
   9  -7   7  150.60   83.12
   9   7   8  447.59  118.97
  -9   7  -8  375.02   79.25
   9  -7   8  133.40   68.23
   9   7   9  698.15  263.24
  -9   7  -9  459.19  222.81
   9   9 -10   48.71   44.57
   9   9 -10  243.14   73.29
   9  -9 -10  246.17   69.38
   9   9  -9 1065.57  204.69
   9   9  -9 1100.79  222.70
   9  -9  -9  812.96  248.51
   9   9  -8  232.54   74.42
   9   9  -8  455.35  106.20
   9  -9  -8  259.97   65.88
   9   9  -7  151.52   40.72
   9   9  -7   49.93   37.48
   9  -9  -7  115.14   41.41
   9   9  -6  169.41   38.30
   9   9  -6   49.15   16.52
  -9   9   6   20.32    9.17
   9  -9  -6  128.21   48.57
   9  -9  -6  100.17   40.14
   9   9  -5    1.70   32.58
[truncated: 105,538 more chars]
